# Supplementary material for: Comparative Genomics Analysis of Repetitive Elements in Ten Gymnosperm Species: “Dark Repeatome” and Its Abundance in Conifer and Gnetum Species
Source: MDPI journal article supplement (doi:10.3390/life11111234), 2021-11-15
Supplement: s1 [file s1]

A.

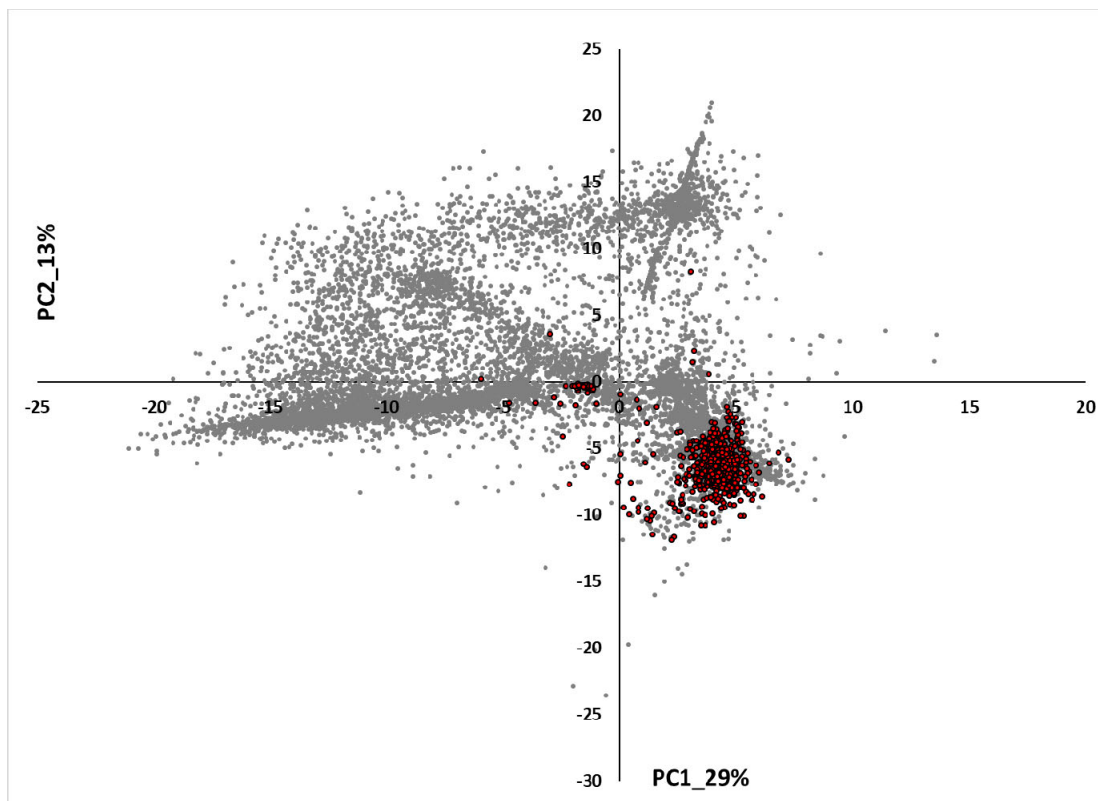

B.

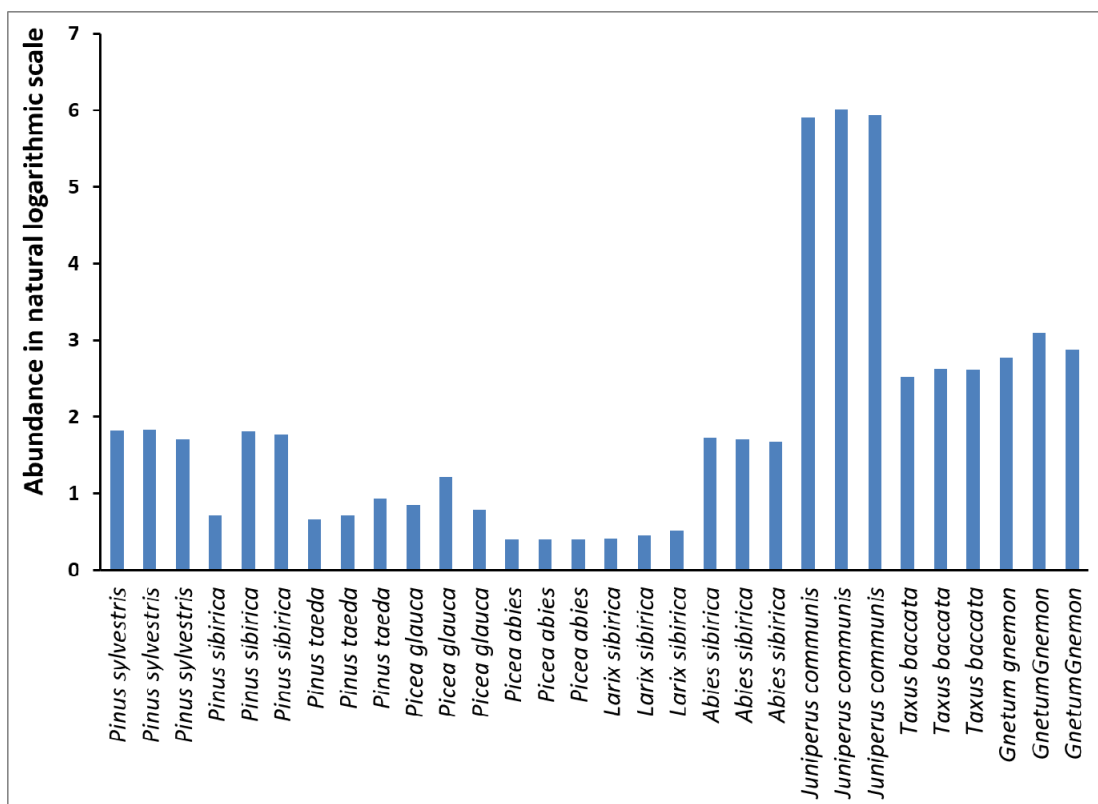

Figure S3. PC1-PC2 distribution of kChains annotated as *Cyprinus carpio* genomic sequences

A. Projection of *kChains* on the PC1-PC2 plane. Dots on the graph represent *kChains*. Dots colored red denote *kChains* annotated as *Cyprinus carpio* genome elements.

B. Average abundance levels of kChains annotated as *Cyprinus carpio*.
