# Supplementary material for: Comparative Genomics Analysis of Repetitive Elements in Ten Gymnosperm Species: “Dark Repeatome” and Its Abundance in Conifer and Gnetum Species
Source: MDPI journal article supplement (doi:10.3390/life11111234), 2021-11-15
Supplement: s1 [file s1]

A.

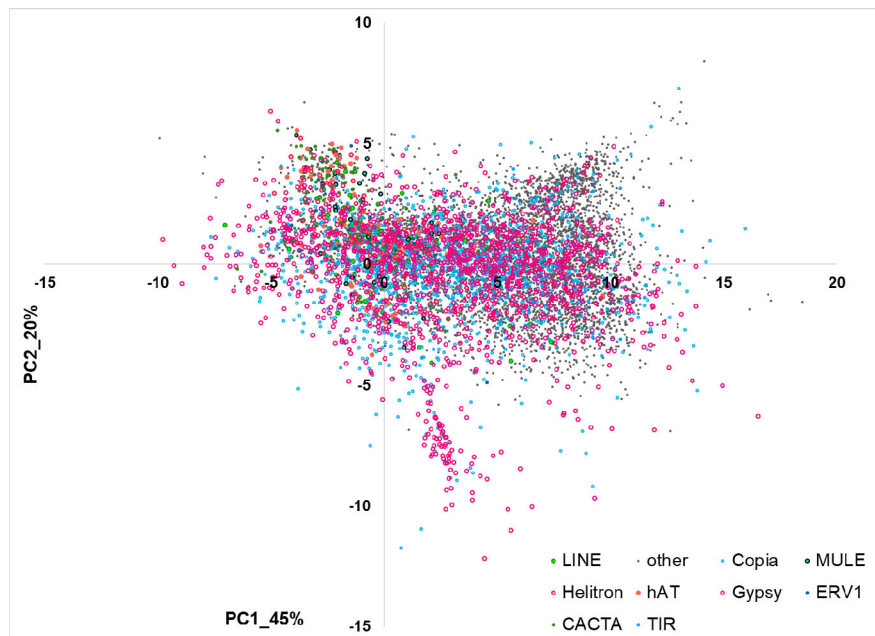

B.

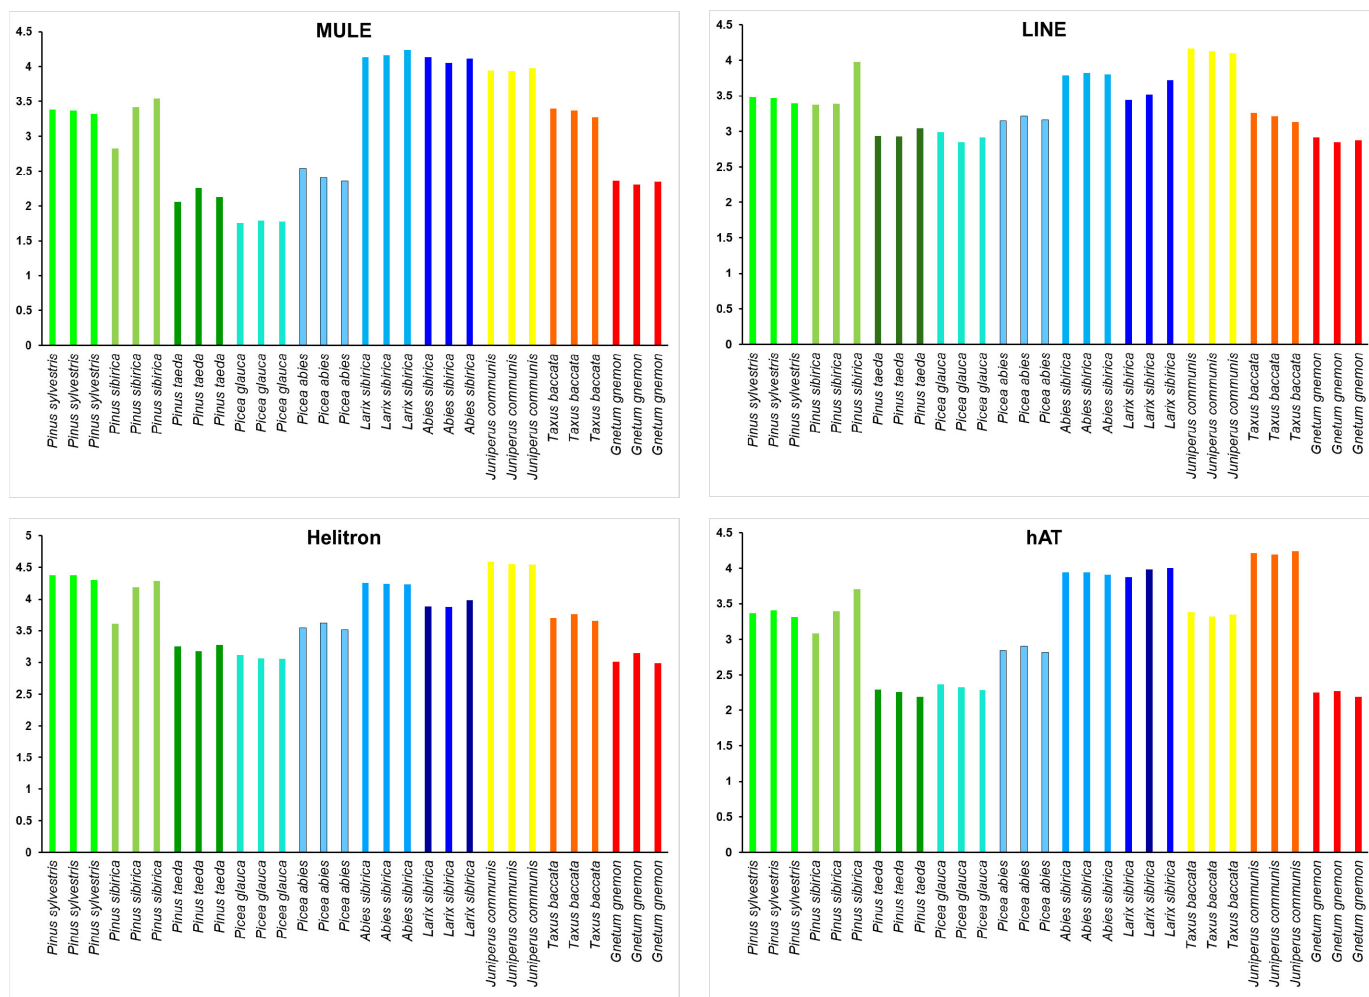

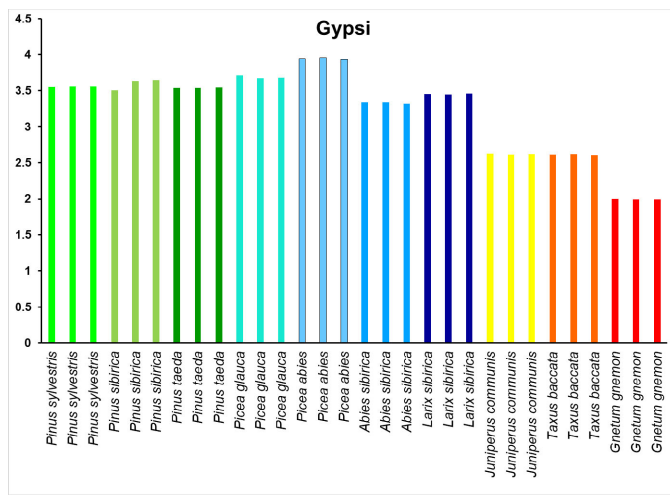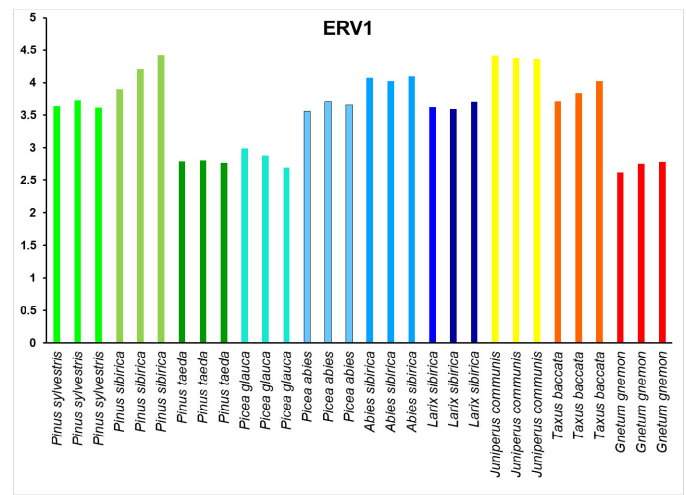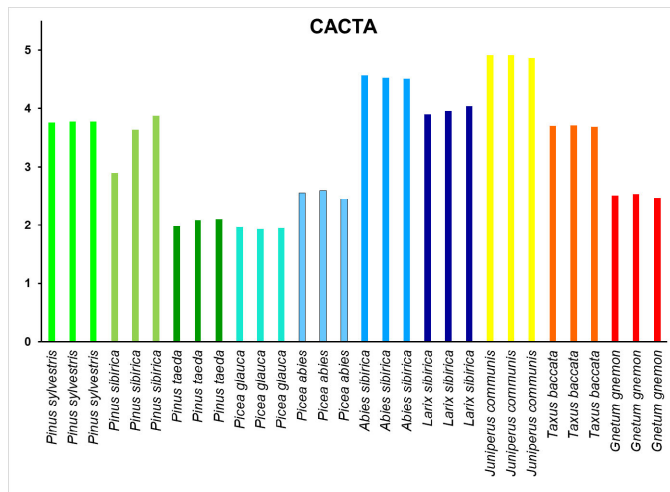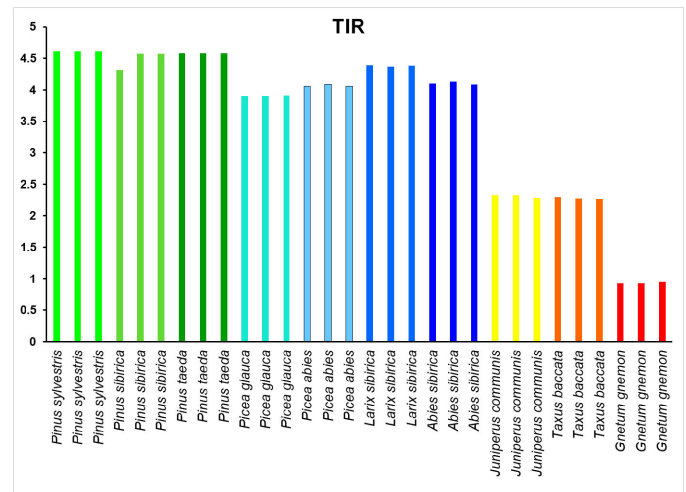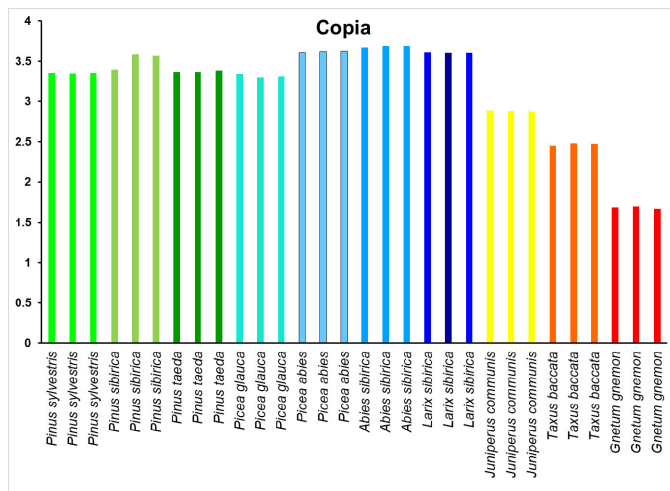

**Figure S1. Abundance of families of known repeats across plant species**

- A.** Projection of RepBase and PIER repeats on the PC1-PC2 plane. Dots on the graph represent repeats. Different colors denote repeats from different families.
- B.** Average abundance levels of repeats from different families across 30 plant species
