# Supplementary material for: Comparative Genomics Analysis of Repetitive Elements in Ten Gymnosperm Species: “Dark Repeatome” and Its Abundance in Conifer and Gnetum Species
Source: Life (Basel). 2021 Nov 15;11(11):1234. doi: 10.3390/life11111234 (PMC8620675; doi:10.3390/life11111234)
Supplement: Supplementary file 1 [file life-11-01234-s001.zip]

Archive with 8 entries (8 files):
- Figure_S2_SimplifiedKnownPhylogeny.pdf
- Table_S2_Abundances_of_RE_from_RepBase_and_PIER_databases.txt
- Table_S3_Abundance_matrix_of_cpDNA-kChains.txt
- Table_S4_Abundance_matrix_of_kChains_aligned_CyprinusCarpio.txt
- Table_S5_Abundance_matrix_of_nuclear_genomic_Kchains_withSequences.xlsx
- Table_S1_Species taxonomy and links to the sequencing data used in the study.xlsx
- Figure_S1_Abundance of families of known repeats across plant species.pdf
- Figure_S3_PC1-PC2 distribution of kChains annotated as Ciprinus carpio genomic sequences.pdf
