# Supplementary material for: Comparative Genomics Analysis of Repetitive Elements in Ten Gymnosperm Species: “Dark Repeatome” and Its Abundance in Conifer and Gnetum Species
Source: Life (Basel). 2021 Nov 15;11(11):1234. doi: 10.3390/life11111234 (PMC8620675; doi:10.3390/life11111234)
Supplement: Supplementary file 1 [file life-11-01234-s001.zip › Table_S1_Species taxonomy and links to the sequencing data used in the study.xlsx]

## Sheet: Table S1
Unranked	Division or Phylum	Class	Subclass	Order	Family	Genus	Subgenus	Section	Species	SRA	Links
Gymnosperms	Pinophyta (aka Coniferophyta or Coniferae)	Pinopsida	Pinidae	Pinales	Pinaceae	Pinus	Pinus	Australes	Loblolly pine (Pinus taeda)	SRR1049544	UC Davis, USA (http://pinegenome.org/pinerefseq/)
								Pinus	Scots pine (Pinus sylvestris)	ERR268440	http://www.ncbi.nlm.nih.gov/sra/ERX242667%5Baccn%5D
							Strobus	Strobus	Siberian stone pine (Pinus sibirica)	PRJNA774651	https://www.ncbi.nlm.nih.gov/bioproject/PRJNA774651a Genome Research and Education Center, Siberian Federal University, Russia (Krutovsky et al. 2014)PRJNA774651
						Picea	*	Clade I	White spruce (Picea glauca)	SRR525204	Genome Sciences Centre, British Columbia Cancer Agency and Institute for Systems and Integrative Biology, Université Laval, Canada (https://dendrome.ucdavis.edu/treegenes/species/more_spec/pagl_detail.php)
								Clade III	Norway spruce (Picea abies)	ERX242646	Umeå Plant Science Centre, Umeå University, Sweden (ftp://plantgenie.org/Data/ConGenIE/)
						Abies	*	Balsamea	Siberian fir (Abies sibirica)	ERX242659	http://www.ncbi.nlm.nih.gov/sra/ERX242659%5Baccn%5D
						Larix	*	Larix	Siberian larch (Larix sibirica)	PRJNA774651	Author’s data Genome Research and Education Center, Siberian Federal University, Russia (Krutovsky et al. 2014)https://www.ncbi.nlm.nih.gov/bioproject/PRJNA774651
				Cupressales	Cupressaceae	Juniperus	Juniperus	Oxycedrus	Common juniper (Juniperus communis)	ERX242663	http://www.ncbi.nlm.nih.gov/sra/ERX242663%5Baccn%5D
					Taxaceae	Taxus	*	**	English yew (Taxus baccata)	ERX242665	http://www.ncbi.nlm.nih.gov/sra/ERX242665%5Baccn%5D
	Gnetophyta	Gnetopsida	Gnetidae	Gnetales	Gnetaceae	Gnetum	*	Gnetum	Gnetum (Gnetum gnemon)	ERX242661	http://www.ncbi.nlm.nih.gov/sra/ERX242661%5Baccn%5D
Krutovsky K.V., Oreshkova N.V., Putintseva Yu.A., Ibe A.A., Deych K.O., Shilkina E. A.(2014) Preliminary results of de novo whole genome sequencing of the Siberian larch (Larix sibirica Ledeb.) and the Siberian stone pine (Pinus sibirica Du Tour). Siberian Journal of Forest Science, 1(4), 79–83 (in Russian with English abstract) [11]
