# Supplementary material for: Comparative Genomics Analysis of Repetitive Elements in Ten Gymnosperm Species: “Dark Repeatome” and Its Abundance in Conifer and Gnetum Species
Source: Life (Basel). 2021 Nov 15;11(11):1234. doi: 10.3390/life11111234 (PMC8620675; doi:10.3390/life11111234)
Supplement: Supplementary file 1 [file life-11-01234-s001.zip › Table_S2_Abundances_of_RE_from_RepBase_and_PIER_databases.txt]

Table S2. Abundance matrix of RepBase and PIER repeats across 30 samples of conifers
Class	Order	Superfamily	Family	RE_Name_Database_Name	Juniperus_communis	Juniperus_communis	Juniperus_communis	Taxus_baccata	Taxus_baccata	Taxus_baccata	Pinus_sylvestris	Pinus_sylvestris	Pinus_sylvestris	Pinus_sibirica	Pinus_sibirica	Pinus_sibirica	Larix_sibirica	Larix_sibirica	Larix_sibirica	Picea_glauca	Picea_glauca	Picea_glauca	Pinus_taeda	Pinus_taeda	Pinus_taeda	Picea_abies	Picea_abies	Picea_abies	Gnetum_gnemon	Gnetum_gnemon	Gnetum_gnemon	Abies_sibirica	Abies_sibirica	Abies_sibirica
Transposon	TIR	TIR	TIR	PtDTX_10_B_PIER	0	0	1.38629	0	0	0.693147	5.56909	5.59052	5.59326	5.44917	5.36254	5.40961	5.34589	5.22726	5.23513	5.55512	5.56961	5.5182	5.28981	5.24165	5.25015	5.76611	5.7197	5.82505	0	0	0	5.71016	5.59653	5.71703
Transposon	TIR	TIR	TIR	PtDTX_10_PIER	2.5177	1.91692	2.5123	1.79176	1.38629	0.693147	5.64554	5.6206	5.64694	5.3614	5.20401	5.22945	5.28092	5.30531	5.32206	5.19018	5.26546	5.20308	5.2206	5.1534	5.22942	5.57864	5.47227	5.55839	1.38629	1.64866	0.693147	4.8469	4.77401	4.73771
Transposon	TIR	TIR	TIR	PtDTX_100_PIER	1.74469	2.012	2.07944	2.14951	2.11373	2.04629	4.9992	5.00989	5.01481	3.61826	3.54258	3.52733	4.78289	4.72523	4.61774	4.83727	4.7136	4.63387	5.2867	5.26845	5.24983	4.84206	4.83913	4.85403	0.693147	2.74727	2.07944	4.50828	4.33449	4.34783
Transposon	TIR	TIR	TIR	PtDTX_106_PIER	3.18399	2.92884	3.06027	1.93284	1.38629	1.89184	3.25311	3.26873	3.21723	3.28282	3.42443	3.42678	3.81986	3.85038	3.75334	4.91162	4.92172	4.89199	3.25463	3.13004	3.22024	5.24772	5.33146	5.26365	2.90612	2.40394	2.89775	3.03086	3.05765	3.00815
Transposon	TIR	TIR	TIR	PtDTX_108_PIER	1.43508	1.45529	0.693147	1.55463	1.33977	0.980831	4.36569	4.33248	4.29768	4.72954	5.1838	5.19527	5.26105	5.39909	5.35997	4.89662	4.80106	4.75411	4.64198	4.62565	4.63391	5.03061	5.09364	5.10184	0	0.693147	0	5.12211	5.01589	5.11762
Transposon	TIR	TIR	TIR	PtDTX_11_B_PIER	3.64021	4.06781	3.73265	4.21951	4.19167	3.82864	4.13714	4.16273	4.19178	5.33084	5.48966	5.48771	4.4298	4.39487	4.40882	4.558	4.51882	4.64171	3.98824	4.00447	3.99867	4.5147	4.61512	4.61142	3.05636	3.09104	3.29584	4.23623	4.40635	4.35565
Transposon	TIR	TIR	TIR	PtDTX_11_C_PIER	0	0	0	0	0	0	3.92263	3.7668	3.97594	5.80604	6.49884	6.50491	4.89229	4.76606	4.82979	4.02781	4.16878	4.31348	3.85381	4.01317	3.89981	4.42807	4.44656	4.49267	0	0	0	5.53919	5.59148	5.39843
Transposon	TIR	TIR	TIR	PtDTX_11_PIER	0	0.693147	0.693147	2.89037	3.00311	3.91202	5.15685	5.13743	5.13303	6.43247	6.75561	6.74552	6.2612	6.25997	6.26111	5.75859	5.7128	5.74457	5.11804	5.08214	5.12032	5.89891	5.88895	5.87398	0	0	0.693147	5.77812	5.83494	5.84991
Transposon	TIR	TIR	TIR	PtDTX_110_B_PIER	0	0.693147	0	0	0	0	4.35868	4.26038	4.34199	2.7321	2.86007	3.18694	3.08089	3.36071	3.22308	5.90556	5.5846	5.74234	4.66226	4.72053	4.75577	5.48341	5.38692	5.25723	0	0	0	1.95238	2.80232	2.3394
Transposon	TIR	TIR	TIR	PtDTX_114_B_PIER	1.43508	0	0.693147	0.693147	0.693147	1.38629	5.63809	5.63441	5.67039	4.14433	4.3029	4.41499	5.24139	5.38214	5.33955	5.84625	5.96674	5.89555	5.47519	5.40402	5.37469	4.96083	5.17169	5.14925	0.693147	0	0	4.50242	4.39413	4.26913
Transposon	TIR	TIR	TIR	PtDTX_121_C_PIER	0	0	0	1.85428	1.55242	1.5329	4.28865	4.23797	4.27391	5.12745	5.30282	5.32884	5.32713	5.38553	5.34003	4.13035	4.03925	4.14847	4.25062	4.18035	4.3088	4.45992	4.48987	4.49388	0	0	0	4.22967	4.24585	4.24141
Transposon	TIR	TIR	TIR	PtDTX_121_D_PIER	0	0	0.693147	1.30406	1.42603	1.31568	4.42897	4.37556	4.3902	5.36589	5.60412	5.56038	5.25546	5.22005	5.20277	3.3852	3.64271	3.54556	4.46973	4.4635	4.55282	4.41858	4.51663	4.63544	0	0	0	4.73944	4.73641	4.72856
Transposon	TIR	TIR	TIR	PtDTX_122_PIER	3.09496	3.34918	3.22115	2.51632	2.29775	2.57588	4.17241	4.18717	4.18349	4.91401	5.36278	5.32968	4.87217	4.90873	4.9431	3.26361	3.1612	3.20862	4.27787	4.27417	4.31138	3.50436	3.46035	3.50137	2.00653	2.33075	2.26868	3.56368	3.61305	3.61606
Transposon	TIR	TIR	TIR	PtDTX_123_B_PIER	1.509354559	2.036882362	2.355031422	1.446918983	1.819158984	1.572396263	3.730935087	3.712212606	3.674892085	2.10566956	2.613424454	2.51532269	2.403651402	2.892896346	2.615876431	1.76766143	1.609437912	1.725509262	4.137306665	4.169674644	4.122546457	1.609437912	1.714799228	1.982814996	1.098612289	0	0	5.186502734	5.483651049	5.409559054
Transposon	TIR	TIR	TIR	PtDTX_125_PIER	1.80246	1.84103	1.85428	4.39339	4.14771	4.22391	4.15742	4.15606	4.20634	4.57607	4.97834	4.80558	5.72778	5.52956	5.72762	1.52886	1.16513	1.21584	4.21907	4.26661	4.19024	1.31847	1.16475	1.55725	0	0.693147	0.693147	4.48398	4.57556	4.55285
Transposon	TIR	TIR	TIR	PtDTX_128_PIER	6.39147	6.41142	6.32809	2.41215	2.72607	2.50844	4.14732	4.12799	4.18252	4.99961	5.12377	5.07394	6.38755	6.30355	6.27344	6.34877	6.4214	6.35479	3.93334	3.95279	3.95086	6.5699	6.56449	6.62783	2.22389	2.13828	2.15948	7.29336	7.29115	7.25498
Transposon	TIR	TIR	TIR	PtDTX_129_PIER	1.90848	2.14843	2.37639	3.77673	3.69694	3.83154	4.29492	4.25725	4.24587	4.76382	5.06811	4.99152	3.82817	3.70292	3.76442	3.47431	3.30941	3.40901	4.26364	4.28597	4.32074	3.41073	3.35373	3.32151	0	0	0	3.26943	3.31029	3.37311
Transposon	TIR	TIR	TIR	PtDTX_13_B_PIER	0.693147	1.67398	1.58045	2.77259	1.96361	2.30259	5.74388	5.7234	5.66959	4.95122	5.36316	5.30983	4.98836	5.05195	5.09342	4.79388	4.76885	4.69189	6.15527	6.12439	6.13757	4.9557	4.78991	4.84805	0	0	1.17865	4.33503	4.40025	4.44128
Transposon	TIR	TIR	TIR	PtDTX_13_PIER	3.804119258	3.738752365	3.976928334	2.990161787	2.749102569	2.571619371	4.927007278	4.955150773	4.972698024	3.067103647	3.60650006	3.559618928	3.997179997	4.028970136	4.071161227	2.870169051	2.94237369	2.825133733	6.133408889	6.107152055	6.051639656	2.838610518	2.770210897	2.82081325	3.027821851	2.583423803	2.744420702	3.433341835	3.455031944	3.438011355
Transposon	TIR	TIR	TIR	PtDTX_132_PIER	5.80353	5.78239	5.66064	3.65066	3.57981	3.67207	5.47707	5.56944	5.51926	6.50103	6.05538	5.96757	3.91804	3.97265	3.76352	7.11899	6.79342	6.98929	5.31315	5.18965	5.33064	7.43838	7.4729	7.35538	2.36713	2.11021	2.83321	4.7365	4.87649	4.9288
Transposon	TIR	TIR	TIR	PtDTX_134_PIER	1.38629	2.05645	1.91692	1.77071	2.22848	2.27235	4.9025	4.86933	4.92767	4.53086	4.89046	4.86461	5.19509	5.17279	5.12967	0.967584	1.09861	1.17007	5.09791	5.04545	5.00607	1.25276	1.06087	1.38629	0	0.693147	0	4.15424	4.24722	4.21497
Transposon	TIR	TIR	TIR	PtDTX_135_PIER	2.63296	2.58515	2.33178	1.64782	2.12904	2.51023	4.60491	4.65691	4.59136	5.06805	5.47657	5.49053	6.14874	6.0176	6.12139	4.74071	4.50387	4.55647	4.75036	4.67281	4.75873	4.50279	4.58693	4.50041	1.40983	1.16315	2.04307	4.80339	4.68082	4.67676
Transposon	TIR	TIR	TIR	PtDTX_142_PIER	2.25769	2.04841	2.34692	2.77945	2.90666	2.70406	4.69803	4.67232	4.69802	5.51609	5.75332	5.75103	4.38956	4.39144	4.44908	4.04479	4.01392	4.01864	4.29904	4.29228	4.32574	4.64472	4.62059	4.62908	3.00847	3.37505	3.18584	3.38272	3.32007	3.34425
Transposon	TIR	TIR	TIR	PtDTX_144_PIER	5.49975	5.42384	5.40414	0	0.693147	0.693147	4.28588	4.30963	4.28982	4.44145	4.7586	4.74728	5.35722	5.36705	5.37342	5.75444	5.80043	5.74005	3.80212	3.88237	3.94169	5.531	5.51108	5.58838	0	1.42139	0.693147	5.95659	6.01274	6.02845
Transposon	TIR	TIR	TIR	PtDTX_145_D_PIER	0	0	0	1.44989	1.47331	1.35095	5.69018	5.72534	5.7155	5.90718	6.13395	6.13021	5.81789	5.86917	5.82585	4.38035	4.39407	4.38264	5.84101	5.84205	5.82699	4.78014	4.78122	4.77469	0	0.693147	0	4.18601	4.18338	4.16079
Transposon	TIR	TIR	TIR	PtDTX_145_PIER	0	0.693147	0.693147	1.88529	1.59322	1.77253	4.01608	4.06736	4.07003	4.29831	4.48112	4.4631	5.12012	5.17075	5.1986	4.15944	4.19483	4.23946	4.06512	4.02646	4.00145	4.65285	4.61447	4.62542	0.693147	0	0	4.19404	4.20333	4.13528
Transposon	TIR	TIR	TIR	PtDTX_147_PIER	4.16255	3.76947	3.39777	2.48491	2.70136	2.79728	4.54463	4.50306	4.50472	4.89925	5.08496	5.02002	4.73942	4.70005	4.74853	4.54522	4.52613	4.53578	4.53645	4.44705	4.48969	4.74635	4.85133	4.82203	2.3206	2.12261	1.62746	4.45915	4.40773	4.38414
Transposon	TIR	TIR	TIR	PtDTX_15_PIER	3.61444	3.55108	3.59398	2.83321	2.65042	3.12457	4.6202	4.62967	4.58429	4.78943	5.3469	5.32706	3.79135	3.81922	3.6747	2.90128	2.94625	2.89639	4.52833	4.47876	4.53143	3.2026	3.15709	3.06041	1.7346	1.53393	1.06784	3.85206	3.72532	3.74448
Transposon	TIR	TIR	TIR	PtDTX_151_PIER	3.08089	2.89999	2.79728	2.19165	2.27251	2.12669	4.87873	4.82161	4.85823	3.55221	3.97081	3.89303	4.02299	4.03364	3.8834	5.46808	5.50918	5.40642	5.2882	5.26143	5.24907	5.62136	5.50525	5.58555	1.02962	1.29392	1.06784	5.2607	5.33333	5.17418
Transposon	TIR	TIR	TIR	PtDTX_152_PIER	0.693147	0.693147	0.693147	0.693147	1.0116	1.79176	4.30479	4.22852	4.29056	4.53694	4.80558	4.84732	5.06075	5.02091	5.01748	4.07503	4.07979	4.0538	4.20022	4.17537	4.21038	4.31641	4.31869	4.26212	0	0	0.693147	5.43271	5.41266	5.43818
Transposon	TIR	TIR	TIR	PtDTX_16_B_PIER	2.40612	3.07269	2.53898	1.59283	1.69757	1.82455	4.18935	4.15578	4.15923	4.83633	5.0832	5.02737	5.57313	5.5583	5.6352	4.11418	4.06425	4.13808	4.12659	4.12088	4.11634	4.63413	4.59938	4.64613	2.63906	0.693147	1.79176	4.12713	4.16715	4.1263
Transposon	TIR	TIR	TIR	PtDTX_161_D_PIER	2.01807	2.63009	2.3979	0.693147	0.693147	0.693147	4.59465	4.59621	4.66225	5.06028	5.22381	5.18622	4.01458	4.14611	4.14887	3.97077	3.85039	4.25592	4.59964	4.64659	4.71668	4.66268	4.46766	4.5033	0	0.693147	0	3.94825	4.16194	3.95484
Transposon	TIR	TIR	TIR	PtDTX_166_B_PIER	1.69168	0.693147	0.693147	1.29098	1.8563	1.79176	5.77161	5.74086	5.72292	4.6639	4.73411	4.77944	3.55266	3.4785	3.53788	4.95003	4.88047	4.9583	5.86904	5.90308	5.9193	5.18697	5.17398	5.23477	0	1.21924	0	2.77882	3.07864	2.67101
Transposon	TIR	TIR	TIR	PtDTX_168_B_PIER	1.83828	1.23214	1.79176	0.693147	0	1.50408	5.17828	5.20182	5.2632	3.92377	3.89606	4.01436	2.66522	2.41976	2.63764	2.22621	2.0826	2.18304	5.10998	5.08512	5.19296	2.47598	2.38617	2.38933	0.693147	0	0	3.12394	3.31494	3.20314
Transposon	TIR	TIR	TIR	PtDTX_174_PIER	2.14316	2.56187	2.25479	1.96944	1.65694	1.65068	3.6329	3.5516	3.50662	4.16266	4.72184	4.64388	5.97981	5.98899	5.92526	4.69036	4.57041	4.77683	3.6941	3.61266	3.63733	4.74296	4.77474	4.67519	1.38629	1.29098	1.64866	4.20212	4.29843	4.33877
Transposon	TIR	TIR	TIR	PtDTX_175_PIER	3.31023	3.1537	3.3818	3.44335	3.19588	3.3074	5.04198	5.01301	5.05115	6.2836	6.34577	6.31367	3.64803	3.64375	3.61692	5.6004	5.54785	5.55021	4.77933	4.7424	4.71934	6.60995	6.61348	6.59962	0.693147	0.693147	1.60944	3.8377	3.85766	3.8718
Transposon	TIR	TIR	TIR	PtDTX_177_PIER	0	0	0	2.41429	2.20765	1.91817	3.95617	3.92709	3.98392	3.87167	4.25521	4.22675	6.1622	6.11208	6.18352	4.38281	4.31358	4.43525	3.93846	4.17046	4.11132	5.05253	5.05055	5.09319	0	0	0	5.06627	5.13756	5.20908
Transposon	TIR	TIR	TIR	PtDTX_179_PIER	6.40391	6.53242	6.44914	0.693147	1.06784	0	4.71436	4.68579	4.70471	5.02088	5.19063	5.2097	6.34856	6.31497	6.32649	6.57925	6.65089	6.56108	4.27312	4.26727	4.28877	6.43515	6.46422	6.47914	1.23547	1.25276	1.33829	6.97591	7.00349	6.94407
Transposon	TIR	TIR	TIR	PtDTX_18_B_PIER	2.70805	3.21314	2.07944	2.58022	2.89037	1.97408	5.2351	5.24442	5.26332	4.1482	4.2614	4.19789	4.81503	5.07075	5.00324	5.24038	5.44399	5.33228	4.64929	4.77876	4.74106	5.39504	5.37109	5.26698	0	0	1.72277	3.16875	3.06942	2.90528
Transposon	TIR	TIR	TIR	PtDTX_181_PIER	1.4816	1.08619	0.693147	2.23547	2.38679	2.33434	3.49491	3.32949	3.4647	3.05798	3.10818	3.06882	5.74355	5.58086	5.56478	4.61806	4.67445	4.52687	3.44356	3.54416	3.56052	4.83353	4.84801	4.79496	0.693147	1.12059	0.693147	4.99973	5.05378	5.1055
Transposon	TIR	TIR	TIR	PtDTX_183_PIER	4.68044	4.58052	4.71167	4.93869	4.92561	4.98384	4.96881	4.92638	4.9729	5.51267	5.51753	5.50439	5.80265	5.79798	5.77672	5.7671	5.7264	5.73429	4.546	4.6027	4.4977	5.99936	6.03288	6.03653	0.693147	0	0	5.57663	5.63597	5.55787
Transposon	TIR	TIR	TIR	PtDTX_2_B_PIER	2.24071	2.35291	2.7591	3.64893	3.66284	3.68516	3.78521	3.80834	3.77217	4.91597	5.20463	5.1433	3.70042	3.68537	3.75489	3.80532	3.88984	3.95981	3.80281	3.81871	3.7321	3.90123	3.8569	3.95052	0	0	0	3.88821	3.85557	3.82599
Transposon	TIR	TIR	TIR	PtDTX_2_PIER	2.95895	2.36592	2.80232	4.72679	4.79353	4.70833	5.04413	5.00663	4.98939	4.89644	5.13764	5.11251	4.81695	4.85419	4.75833	4.66609	4.72434	4.70028	4.92447	4.85779	4.84835	4.62252	4.64807	4.57322	0.693147	0	0	4.80881	4.76116	4.78939
Transposon	TIR	TIR	TIR	PtDTX_21_B_PIER	3.27484	3.11863	3.19818	3.67128	3.73361	3.42219	4.84319	4.89544	4.83286	4.63294	4.74908	4.74802	4.53972	4.51104	4.51021	3.88632	3.98776	3.97506	5.20803	5.22903	5.237	4.15988	4.14156	4.15598	1.28093	0	1.28093	4.48832	4.54603	4.45252
Transposon	TIR	TIR	TIR	PtDTX_21_PIER	3.47577	2.75891	3.22911	3.30811	3.37657	3.49608	4.89183	4.91244	4.88112	5.54509	5.71355	5.70341	5.30709	5.30109	5.29476	4.71492	4.72617	4.75204	5.17633	5.22321	5.189	4.83575	4.86843	4.82919	0.693147	0	0	5.08203	5.05887	5.04657
Transposon	TIR	TIR	TIR	PtDTX_22_B_PIER	0.693147	0.693147	0	0.693147	0	0.693147	3.35873	3.26531	3.44075	1.31219	0.965081	1.66255	1.46634	1.2164	0.693147	3.2884	3.29171	2.97553	5.02243	5.13946	5.12112	2.32239	2.94444	2.47374	0.693147	0	0	4.06044	4.33073	3.29584
Transposon	TIR	TIR	TIR	PtDTX_22_PIER	1.757857918	1.679642849	1.36330461	1.252762968	1.609437912	1.196250061	4.323258102	4.410128065	4.268919525	1.734601644	1.945910149	1.850028377	1.821612726	1.734601644	1.945910149	1.098612289	1.098612289	1.098612289	5.017723447	5.042243774	5.034136954	1.550598322	1.386294361	1.904238091	1.098612289	1.098612289	1.386294361	1.098612289	1.386294361	1.722766598
Transposon	TIR	TIR	TIR	PtDTX_24_PIER	3.00568	2.9598	2.83503	3.85446	3.80196	3.83279	5.02684	5.01058	5.02897	5.1117	5.37316	5.38119	5.30128	5.16708	5.1982	4.5114	4.72632	4.60309	4.98644	4.96135	4.95311	4.52854	4.50131	4.62804	1.59263	1.6524	2.19722	4.39981	4.41073	4.49441
Transposon	TIR	TIR	TIR	PtDTX_25_B_PIER	2.17125	2.06002	1.82813	3.80335	3.45439	3.72319	5.20489	5.21124	5.20691	4.69135	4.967	4.9679	5.27487	5.33244	5.28447	1.32311	1.36524	1.56454	5.29394	5.28913	5.2754	1.52121	1.53148	1.16575	1.38629	0	0	4.55317	4.56338	4.57791
Transposon	TIR	TIR	TIR	PtDTX_25_PIER	2.0149	2.56802	2.4463	4.52462	4.22868	4.38301	5.35019	5.3002	5.3391	5.38147	5.73503	5.70458	5.82892	5.84094	5.87073	1.55585	0.992388	1.35239	5.35146	5.35273	5.3412	1.46494	1.34117	1.30625	0	1.02165	0	4.97423	4.93986	4.96768
Transposon	TIR	TIR	TIR	PtDTX_26_B_PIER	4.13976	4.08892	4.42439	0.8675	1.49752	1.113	5.02865	5.03309	5.03964	4.25608	4.56619	4.56787	4.08904	4.06732	4.10952	4.46055	4.34155	4.3645	4.99641	4.96522	4.96465	4.54113	4.59731	4.64992	2.26176	0.693147	0.693147	3.97137	3.97391	3.97728
Transposon	TIR	TIR	TIR	PtDTX_27_D_PIER	0	0	0	0	0	0.693147	4.66872	4.82902	4.73002	5.5069	5.30042	5.29392	2.90264	2.63906	2.63906	4.20902	4.40013	4.14779	4.62015	4.48647	4.39293	4.82737	4.99488	4.9412	0	0	0	1.93634	2.82666	1.70475
Transposon	TIR	TIR	TIR	PtDTX_27_E_PIER	1.19625	1.02339	1.79176	4.58333	5.43299	4.65966	5.62255	5.65026	5.6539	5.31379	5.53855	5.58355	4.89075	4.81456	4.86431	5.78274	5.71767	5.73734	5.53886	5.53651	5.55595	5.92824	5.95814	5.90255	0	0	0	4.08672	4.00329	4.02808
Transposon	TIR	TIR	TIR	PtDTX_27_PIER	1.0116	0.693147	1.06784	4.23279	4.87647	4.12961	6.08843	6.09011	6.10304	5.50059	5.7649	5.81845	4.94009	4.93573	4.96634	6.10241	6.11128	6.11967	5.9925	5.98705	5.98434	6.30852	6.25579	6.33922	0.693147	1.02962	1.7346	4.18521	4.09921	4.15705
Transposon	TIR	TIR	TIR	PtDTX_28_B_PIER	4.84812	4.81027	4.75266	4.63753	4.56901	4.53998	4.14552	3.98109	4.03194	5.68125	5.67717	5.6632	6.0895	6.12792	6.13356	5.27063	5.30109	5.26677	3.57011	3.65828	3.53917	6.24214	6.25759	6.29154	0	0	0	5.35672	5.39336	5.34275
Transposon	TIR	TIR	TIR	PtDTX_28_PIER	4.53339	4.73662	4.55105	4.86348	4.72618	4.89208	4.21369	4.15066	4.24094	4.62226	4.5044	4.50245	5.42941	5.41491	5.37331	4.75117	4.73217	4.75884	3.77909	3.7566	3.88779	5.34918	5.35652	5.38784	0.693147	0	0	4.94896	5.08568	4.9027
Transposon	TIR	TIR	TIR	PtDTX_29_B_PIER	3.23487	3.24283	3.32592	3.92916	4.09964	4.08696	3.83632	3.89219	3.78108	5.10459	5.25709	5.25466	4.29088	4.2316	4.32854	2.30259	2.11669	2.22298	4.01507	3.97495	3.88357	2.606	2.51969	2.60206	0	1.38629	1.60944	3.84907	3.82021	3.7795
Transposon	TIR	TIR	TIR	PtDTX_30_B_PIER	1.38629	1.04145	0	0	0	0	5.13187	5.00331	4.90853	0	1.76099	1.13498	1.79176	1.17865	0.693147	0.693147	1.38629	2.04307	4.92241	4.93751	4.90904	0.693147	1.31219	0	0	0	0	1.91239	1.97835	1.7148
Transposon	TIR	TIR	TIR	PtDTX_30_PIER	1.568615918	1.4663363	1.329136536	2.570847315	2.65592147	2.453519177	5.201619224	5.206366538	5.190815671	3.391295183	3.414024758	3.569789002	2.402548068	2.702910348	2.528803911	2.872558484	3.135494216	2.833213344	5.666921375	5.605592486	5.582672661	3.084525812	3.121747994	2.755016481	1.609437912	1.098612289	1.280933845	3.292847216	3.157744825	3.044522438
Transposon	TIR	TIR	TIR	PtDTX_31_C_PIER	0	0	0	0	0	0	5.36677	5.41491	5.43744	0	0	0.693147	0	0	0	0	0	0	5.42871	5.44305	5.4736	0	0	0	0	0	0	0	0	0
Transposon	TIR	TIR	TIR	PtDTX_32_PIER	2.83615	3.1856	2.8348	1.7463	1.79176	1.58204	5.91639	5.89828	5.9009	2.94909	3.9363	3.85165	4.59965	4.66502	4.61083	2.34644	2.33727	2.48811	5.2989	5.30657	5.29673	2.34947	2.76116	2.21417	1.36524	1.34993	0.693147	4.57459	4.57329	4.42912
Transposon	TIR	TIR	TIR	PtDTX_33_B_PIER	2.43142	2.20461	2.17181	3.86023	4.31441	4.6383	4.75622	4.79315	4.79463	4.89682	5.09784	5.10365	5.42253	5.43968	5.45316	2.60317	2.89189	2.92998	4.77689	4.7756	4.74511	2.99118	2.99911	3.0265	0	0	0.693147	3.74056	3.66836	3.65949
Transposon	TIR	TIR	TIR	PtDTX_33_PIER	2.59162	2.91777	2.78719	3.9762	4.48567	4.36227	4.47694	4.47055	4.48112	4.86039	5.07346	5.07949	5.3593	5.35069	5.35568	2.38858	2.7178	2.55042	4.47479	4.45415	4.43427	2.81979	2.80532	2.77259	0	0	0.693147	3.87202	3.77201	3.70361
Transposon	TIR	TIR	TIR	PtDTX_34_B_PIER	0	0	0	0.693147	0	0	4.44694	4.57632	4.53511	3.3398	3.6714	3.60713	5.10602	5.09335	5.14241	4.60799	4.59012	4.69256	4.04735	4.11587	4.06798	4.49455	4.76472	4.47278	0	0	0	4.09746	4.24257	4.20534
Transposon	TIR	TIR	TIR	PtDTX_34_PIER	0	0	0	0.693147	0.693147	0	4.91989	4.96642	4.9575	3.17729	3.46417	3.44999	4.99468	5.14022	4.98573	5.32973	5.24013	5.31013	4.76865	4.73334	4.72422	4.29931	4.51811	4.22587	0	0.693147	0	4.4106	4.36661	4.4714
Transposon	TIR	TIR	TIR	PtDTX_35_C_PIER	2.89729	2.24852	2.98456	4.17377	3.67946	4.01818	4.74178	4.71251	4.72084	4.2019	4.43366	4.52289	5.04101	5.08209	5.1177	4.73945	4.72898	4.79515	4.72827	4.72364	4.61246	4.9026	4.86928	4.86897	0.693147	0.693147	1.29928	4.22152	4.23155	4.28944
Transposon	TIR	TIR	TIR	PtDTX_35_PIER	3.401197382	3.325036021	2.970414466	1.098612289	1.098612289	1.197703191	5.393236561	5.351531066	5.354555913	3.784348712	4.138032845	4.106895469	3.585990881	3.629660094	3.664092275	4.590056548	4.343919701	4.426841049	5.724764145	5.731832048	5.722152704	4.152597747	4.203787732	4.237427072	1.34117408	1.853891973	1.478102963	3.058190507	3.046282792	3.199815322
Transposon	TIR	TIR	TIR	PtDTX_36_B_PIER	1.38629	0.693147	0.693147	0.693147	0.693147	1.23788	5.22992	5.21953	5.23545	2.68944	2.74783	2.80371	3.88894	3.94387	4.01237	2.57334	3.05929	2.46309	4.5879	4.55133	4.53635	2.89381	3.06427	3.04255	0	0.748719	0	3.53154	3.58199	3.54274
Transposon	TIR	TIR	TIR	PtDTX_36_PIER	0.693147	0.693147	0.693147	0.693147	0.693147	0.693147	5.53298	5.54248	5.58124	2.29288	2.84993	3.0214	4.99781	5.15269	5.07552	4.25425	4.52911	4.54025	4.98237	5.00659	4.95821	4.28433	4.05017	4.14933	0	0.693147	0	4.09352	3.7739	4.05617
Transposon	TIR	TIR	TIR	PtDTX_37_B_PIER	2.28853	2.73302	3.15103	2.36989	2.42518	2.34828	3.99441	4.01672	3.99499	4.6492	4.83637	4.80112	5.30227	5.23727	5.2538	4.48838	4.36709	4.42578	3.97059	4.02957	3.98866	4.82525	4.86095	4.86326	2.62211	2.91957	2.47871	4.15317	4.12849	4.15425
Transposon	TIR	TIR	TIR	PtDTX_38_PIER	6.16164	6.02029	5.73342	4.32661	4.46673	4.50896	3.89321	3.88813	3.90385	3.50526	3.80065	3.83617	4.10493	4.04068	4.13573	3.76838	3.72206	3.84721	3.98176	3.93826	3.91182	3.83805	3.85232	3.78834	3.00196	2.49595	2.15543	4.3246	4.3665	4.2514
Transposon	TIR	TIR	TIR	PtDTX_4_B_PIER	2.03229	2.18864	1.99655	5.38154	4.67683	5.08691	4.54064	4.58769	4.58005	5.08868	5.35557	5.3372	5.09089	5.02292	5.10857	5.7378	5.6144	5.69041	4.64377	4.65408	4.65317	5.43922	5.53092	5.50452	4.5459	4.90222	4.62162	5.13798	5.10561	5.12198
Transposon	TIR	TIR	TIR	PtDTX_4_C_PIER	0	0	0	0	0	0	4.6745	4.67901	4.67214	5.58303	6.28571	6.40782	3.34109	3.5198	3.38627	4.28221	4.57814	4.68829	4.54173	4.52855	4.43806	3.94849	3.82529	4.19302	0	0	0	4.28063	4.15192	4.17823
Transposon	TIR	TIR	TIR	PtDTX_4_PIER	2.31867	2.222	2.13236	5.40788	5.00792	5.48871	4.55577	4.56363	4.57224	5.11936	5.42497	5.40303	5.12567	5.11507	5.17478	6.02363	5.91466	5.92898	4.61323	4.61505	4.64092	5.74715	5.74886	5.72157	4.68716	5.15521	4.66738	5.19087	5.2056	5.22776
Transposon	TIR	TIR	TIR	PtDTX_41_PIER	2.8596	3.07797	2.67149	1.8718	1.4604	1.49752	5.43428	5.36935	5.4085	4.03155	4.30149	4.30819	4.35334	4.39537	4.38494	3.60569	3.54482	3.67157	5.36139	5.39944	5.32654	4.06208	4.20195	4.20368	0.693147	0.693147	0	3.4039	3.39668	3.37821
Transposon	TIR	TIR	TIR	PtDTX_42_PIER	7.61412	7.55363	7.6284	5.32811	5.74101	5.32788	4.5774	4.31878	4.49862	2.38774	3.14062	3.52636	4.33488	4.23169	4.25834	1.38629	0.693147	0.693147	2.58323	2.47208	2.52763	2.89828	2.44854	2.98134	2.65926	3.20227	2.902	6.12985	5.88876	6.1271
Transposon	TIR	TIR	TIR	PtDTX_44_PIER	3.78419	3.89046	3.80348	4.29242	4.79579	3.8889	4.60517	4.56058	4.55651	4.92541	4.92806	5.06873	4.83905	4.8287	4.87919	5.22071	5.23201	5.17745	4.44852	4.34489	4.41145	5.40921	5.44752	5.35128	0	0	0	4.94455	4.94263	4.94371
Transposon	TIR	TIR	TIR	PtDTX_46_PIER	0	0	0	0	0	0	4.35252	4.30053	4.32101	4.27907	4.25179	4.24349	5.48338	5.49657	5.47905	1.54992	1.41099	1.39569	3.64103	3.67905	3.68942	1.38629	1.65823	1.13498	0	0	0	4.27401	4.26133	4.34841
Transposon	TIR	TIR	TIR	PtDTX_50_PIER	1.72277	2.07944	2.02815	1.60944	1.74297	0.693147	3.76226	3.80484	3.73501	3.67611	3.77469	3.82965	5.63388	5.63386	5.59663	4.62284	4.53518	4.71064	3.4842	3.54722	3.54153	4.60415	4.78667	4.63864	0	0	0	5.43562	5.43573	5.44891
Transposon	TIR	TIR	TIR	PtDTX_54_PIER	0	0.693147	0	0	0	0	5.523	5.59949	5.51669	3.68958	3.75884	3.69869	1.43075	1.29928	2.61496	0.693147	0.693147	1.31219	5.36536	5.38721	5.26172	0	0	0	0	0	0	1.72924	1.64866	0.744439
Transposon	TIR	TIR	TIR	PtDTX_55_PIER	5.26865	5.26389	5.31963	5.50533	5.58869	5.58869	3.74121	3.77929	3.82049	4.4474	4.38661	4.35296	3.87595	3.70325	3.7653	4.20283	4.23048	4.23314	3.98505	3.96766	3.97155	3.81671	3.7668	3.9311	0	0	0	2.98781	3.13883	3.13983
Transposon	TIR	TIR	TIR	PtDTX_56_PIER	3.012259936	2.753272102	3.213863283	2.763074859	2.671351638	2.611201505	2.936587182	2.929368087	2.926709044	2.325353905	2.534418776	2.512302921	3.118423246	3.131608415	3.225326971	3.029887293	3.019053214	2.977222011	2.934744773	3.066614692	3.138429036	3.201102817	3.333375253	3.279361143	2.079441542	2.095340727	2.061422673	4.865308899	5.066278116	4.96284463
Transposon	TIR	TIR	TIR	PtDTX_59_PIER	3.45143	3.46574	3.35988	1.81118	0.693147	1.50408	4.14018	4.12851	4.09967	5.0296	5.34619	5.34008	3.31582	3.30192	3.14637	3.89324	3.92748	3.90529	4.08888	4.07417	4.06233	4.48552	4.45899	4.44666	1.58045	0.693147	1.7492	3.42397	3.43098	3.41723
Transposon	TIR	TIR	TIR	PtDTX_6_C_PIER	3.13816	3.00718	3.0076	2.7793	3.17369	3.21265	4.38483	4.41551	4.38904	4.59784	5.20296	5.1592	4.04888	3.87567	3.88975	3.17277	3.19609	3.18411	4.60528	4.614	4.57873	2.97886	3.09143	3.05723	0.693147	0.693147	2.07944	3.71586	3.76028	3.80327
Transposon	TIR	TIR	TIR	PtDTX_6_PIER	0	0	0	0.798507	0	0	5.58897	5.64591	5.66867	4.83133	5.23802	5.24947	3.97924	3.81614	3.767	4.71008	4.54191	4.61741	5.70483	5.65337	5.63366	4.44641	4.56612	4.5152	0.693147	0	0.693147	2.43361	2.48051	2.27098
Transposon	TIR	TIR	TIR	PtDTX_63_PIER	5.54963	4.78807	5.24147	2.96438	3.10628	3.08997	3.64885	3.63643	3.65263	3.73203	4.08174	4.01556	4.90916	4.91429	4.90249	4.06168	4.15743	3.99181	3.49945	3.45417	3.45543	4.50965	4.59445	4.53749	3.62126	3.88841	3.58025	3.9993	4.1632	4.03621
Transposon	TIR	TIR	TIR	PtDTX_65_PIER	3.215	3.30811	3.16231	1.56862	1.34491	1.60944	5.07155	5.08047	5.0716	2.90743	2.91663	2.84829	4.12767	4.03138	3.90712	4.05701	3.78454	3.80154	4.56086	4.56783	4.52678	4.14565	4.19432	4.2683	2.07944	1.49752	1.57554	3.74188	3.83681	3.63717
Transposon	TIR	TIR	TIR	PtDTX_70_PIER	1.098612289	0	0	1.098612289	1.098612289	0	2.010727649	2.025374668	1.893012561	1.098612289	1.635754571	1.098612289	1.098612289	1.098612289	1.945910149	0	1.098612289	0	1.098612289	1.349925976	1.539345866	1.098612289	1.098612289	0	1.609437912	1.098612289	1.098612289	5.198497031	4.96284463	4.795790546
Transposon	TIR	TIR	TIR	PtDTX_71_PIER	1.098612289	1.098612289	0	0	0	0	3.878766074	3.961079801	3.902067615	2.621903904	3.305504795	3.204809354	0	0	0	0	0	0	5.275202259	5.20877005	5.200974622	0	1.098612289	1.098612289	0	0	0	0	0	0
Transposon	TIR	TIR	TIR	PtDTX_72_PIER	3.98718	3.80666	3.55162	2.34181	1.9818	2.25957	4.66259	4.67463	4.63392	5.08739	5.41106	5.43259	4.70565	4.72438	4.68602	4.73897	4.62882	4.74186	4.70444	4.71549	4.70969	5.28764	5.26496	5.27201	1.94591	1.26113	1.47331	4.8597	4.85446	4.81146
Transposon	TIR	TIR	TIR	PtDTX_86_PIER	0.9904	1.60944	0.723919	1.38629	0	0	4.80658	4.8297	4.85917	3.75125	3.7426	3.7575	4.56576	4.51856	4.53466	5.26856	5.30827	5.31234	4.6137	4.57448	4.57324	5.22585	5.25942	5.26686	0	0	0	4.88488	4.99802	5.01617
Transposon	TIR	TIR	TIR	PtDTX_87_PIER	0	0	0	0	0	0	4.23048	4.31065	4.1729	4.91913	5.06562	5.18344	0	0	0	0	0	0	4.18459	4.33566	4.31303	0	0	0	0	0	0	0	0	0
Transposon	TIR	TIR	TIR	PtDTX_9_B_PIER	3.72703	3.98107	3.58699	2.34181	2.25129	2.30139	4.76264	4.77753	4.8064	5.31773	5.59814	5.579	5.10505	5.11563	5.12593	3.83087	3.88553	3.87492	4.76021	4.76724	4.80245	4.34829	4.40118	4.40704	3.48395	4.34812	4.5254	3.82945	3.73504	3.86609
Transposon	TIR	TIR	TIR	PtDTX_9_PIER	1.35239	1.79176	0.938271	1.68256	1.84521	1.53039	5.37163	5.39197	5.38157	5.65891	5.92885	5.89607	5.67435	5.59132	5.61833	4.49216	4.50166	4.56171	5.49225	5.50874	5.47295	5.0186	4.9804	4.94832	0	1.38629	0	4.53985	4.41624	4.39882
Transposon	TIR	TIR	TIR	PtDTX_91_PIER	1.77649	1.81916	2.18707	1.60944	2.33368	0.693147	4.76398	4.70127	4.7049	5.18788	5.41211	5.38783	3.81287	3.68301	3.76438	1.87503	1.7107	1.78086	4.60155	4.61195	4.55154	1.90114	1.99646	1.79176	0	0	0.693147	3.3763	3.31462	3.33666
Transposon	TIR	TIR	TIR	PtDTX_95_PIER	5.03044	4.82276	5.06575	5.28742	5.38025	5.35737	3.98072	4.07355	3.92751	4.3535	4.70637	4.77851	4.08215	4.13379	4.18029	3.31419	3.56752	3.28895	4.02488	3.98898	4.20449	4.09434	3.71844	3.97608	0	0	0	3.8192	3.94696	4.0398
Transposon	TIR	TIR	TIR	PtDTX_97_PIER	3.56953	3.54458	3.14631	3.44202	3.19244	3.57846	3.31211	3.47462	3.27691	5.20992	5.25279	5.23498	3.39003	3.01448	3.32098	3.86451	3.82137	3.66783	3.27147	3.21259	3.21735	3.54674	3.91622	3.55535	0	0	0	2.55981	2.53327	2.99573
Transposon	TIR	MULE	MULE-MuDR	DTM_MuDR-11N_VV_PIER	5.83794	5.86258	5.71571	5.03125	4.66015	4.85019	4.94114	5.0533	4.98519	2.96871	3.80983	4.2687	4.39297	4.42667	4.38874	1.09861	0	1.49549	2.07944	2.00882	1.54045	2.51023	2.75457	2.11718	3.55942	3.8712	3.63038	5.33211	5.03412	5.10796
Transposon	TIR	MULE	MULE-MuDR	DTM_MuDR-21_VV_PIER	5.56048	5.23149	5.55239	4.55981	4.55226	4.0897	4.95784	4.37389	4.32532	3.36994	4.77588	4.82335	3.98898	4.00213	4.01143	1.0033	0.693147	0.693147	2.58022	1.82455	1.86075	2.81341	2.38774	2.42238	2.94444	3.2821	3.32071	5.01487	4.7185	4.99368
Transposon	TIR	MULE	MULE-MuDR	DTM_MuDR-5_VV_PIER	3.55344	3.14631	3.32773	3.4761	3.46574	3.20158	4.21951	4.18459	3.48295	3.8471	4.79579	4.08718	5.1656	4.75516	4.78332	2.04022	2.45674	2.79321	3.06473	3.53612	3.14169	3.98279	3.91772	4.21951	2.59739	2.67415	1.29928	2.97553	3.50941	4.2153
Transposon	TIR	MULE	MULE-MuDR	DTM_MuDR-8_VV_PIER	5.94895	6.07236	5.9291	5.66599	5.32707	5.23726	4.9255	5.02344	5.61162	2.84158	3.19309	3.49362	3.30214	3.04018	2.98946	1.09861	0.693147	0	1.38629	2.11453	2.18122	1.44036	1.5235	1.12393	2.98801	2.7191	3.5132	6.17431	6.1104	5.48894
Transposon	TIR	MULE	MULE-MuDR	DTM_MuDR1_HV_PIER	6.71039	6.71955	6.69649	5.49614	5.47855	5.3268	5.64819	5.66912	5.23947	3.26449	4.63715	5.16288	5.11048	5.03207	4.91894	1.29928	1.38629	0	1.60944	2.61007	1.34373	2.3979	2.48491	1.89712	3.34404	3.29053	2.65926	5.8296	5.70304	5.79707
Transposon	TIR	MULE	MULE-MuDR	DTM_MuDR1_ZM_PIER	1.91692	3.03495	3.09104	0	0	0	2.26176	1.91692	2.37955	0	3.53806	3.44042	4.86445	4.94164	5.00529	2.58022	3.22684	3.24259	0	0	0.693147	1.64866	2.30259	2.02815	0.693147	0	0	4.32015	4.1957	4.12066
Transposon	TIR	MULE	MULE-MuDR	DTM_VANDAL6_PIER	2.453725532	2.605153315	3.234749174	1.721442507	2.268683886	2.069780019	1.488076733	0	1.4663363	2.134704758	2.944438979	2.782953571	4.729350493	3.974475603	4.064744092	1.76766143	1.832581464	1.877701664	1.533929576	1.386294361	1.945910149	2.995732274	2.681021529	2.662585501	2.633549331	2.553048048	2.079441542	5.109400106	4.852897076	5.174532607
Transposon	TIR	MULE	MULE-MuDR	DXX_MERMITE18D_sativa	4.32585	5.16427	5.06375	4.72612	4.60517	4.49663	5.27811	5.35793	5.05716	5.80082	6.6475	6.03879	5.58135	5.56178	5.68358	4.3448	4.85203	4.61936	4.60517	4.51243	4.67948	5.6748	5.00239	5.66692	4.96284	4.79461	4.83097	5.33341	4.95069	4.68923
Transposon	TIR	MULE	MULE-MuDR	LONGPAL1_celrep	1.79176	0.693147	0	0	0	0	0	0.693147	0.693147	0	0	0.693147	5.00171	4.9464	4.80129	2.75154	2.30259	1.79176	0.693147	0.693147	0	1.7346	2.36713	2.07944	0	0	0	5.4453	5.44674	5.36753
Transposon	TIR	MULE	MULE-MuDR	MERMITE18B_oryrep	2.871681512	3.010330203	3.209419252	2.833213344	2.409194828	2.590264665	3.897633978	3.452783633	3.724765286	3.569532696	4.924031107	5.043425117	3.290124284	3.229487323	3.142715903	3.706579382	3.135494216	3.069600574	2.833213344	3.05906851	2.25479408	4.367637354	4.196127687	4.163337211	2.197224577	2.087740758	2.427745295	3.787432099	4.055504976	3.695996567
Transposon	TIR	MULE	MULE-MuDR	MERMITE18D_oryrep	3.0869	4.02859	3.56311	3.26903	2.93689	3.24705	4.37126	4.49024	3.99235	4.70824	5.02508	4.78363	3.61477	3.85923	4.07996	2.73003	3.36236	3.38197	3.21523	4.03044	4.11321	4.20682	3.63759	4.33073	3.35574	2.84158	3.01226	4.33073	3.75908	3.55315
Transposon	TIR	MULE	MULE-MuDR	MuDr-1_HV_grasrep	4.14841	4.36847	4.41482	3.55794	3.23475	3.18727	3.88271	3.96301	4.05512	4.03247	4.36628	5.17897	3.42426	3.94297	4.06732	0	1.46634	0.693147	1.32914	1.82813	1.79176	2.33537	1.94591	1.28093	2.61007	3.054	2.18707	3.77276	3.28604	3.4012
Transposon	TIR	MULE	MULE-MuDR	MuDR-1_NV_nemrep	5.48811	5.39135	5.2599	3.8221	3.81551	3.77046	3.42751	3.58906	3.3322	2.65926	3.13549	3.32844	3.23765	3.56105	3.53867	0	0	0.693147	1.38629	1.02962	1.91692	1.56862	1.06087	0.693147	1.29392	0.893816	2.16905	3.65842	3.66821	3.7467
Transposon	TIR	MULE	MULE-MuDR	MuDR-10_GM_edcotrep	3.06891303	3.227589748	3.319202492	2.145095846	2.21193036	2.095340727	2.463853241	2.421851472	2.300256384	3.991903854	2.815229063	2.847232265	6.49023176	6.150351138	6.160964676	2.940674006	2.956991445	3.091042453	1.945910149	1.894174652	2.017797494	2.538976503	2.814659936	3.085198136	2.15397487	2.793205969	2.664084381	3.828641396	4.020086066	4.040855877
Transposon	TIR	MULE	MULE-MuDR	MuDR-11_GM_edcotrep	3.199709315	3.113879687	3.331579315	3.6954379	4.196237573	3.994093195	2.294863357	2.163105761	2.088124981	1.741497222	1.584120104	2.058387707	6.811312658	6.823145743	6.888368565	2.995732274	2.351375257	1.580449787	1.791759469	2.030169887	1.712977772	1.545924999	1.713797928	1.365816106	2.694282527	2.65179726	2.46548595	2.188295947	2.353878787	2.564949357
Transposon	TIR	MULE	MULE-MuDR	MuDR-11B_GM_edcotrep	2.074219179	2.254382806	2.295895769	2.518647633	2.333530312	2.171648046	1.507075121	1.841769524	1.243194479	1.421386371	1.634916557	1.469290396	6.121206895	5.913503006	6.310069176	2.024381953	2.374905755	3.610917913	1.265665091	1.686398954	1.491653877	2.206840419	2.284235769	2.246496107	2.126399075	2.330755553	2.171249003	4.199079882	3.63162633	3.941119565
Transposon	TIR	MULE	MULE-MuDR	MuDR-12_ALy_edcotrep	1.981001469	1.913649615	1.62924054	1.309920747	1.098612289	1.299283893	1.265665091	1.098612289	1.568615918	3.463129384	1.578184575	1.335001067	6.403022721	5.949154467	5.764821128	1.203971804	1.609437912	1.609437912	0	1.098612289	1.098612289	1.285196968	1.427117156	1.178654996	1.098612289	1.35812377	1.4663363	3.044522438	3.819280327	3.064726478
Transposon	TIR	MULE	MULE-MuDR	MuDR-12_CCri_plnrep	5.043425117	3.816865814	4.010962953	1.098612289	0	1.098612289	1.945910149	1.887069649	2.397895273	0	2.197224577	1.609437912	1.609437912	1.413693065	2.564949357	1.098612289	1.098612289	0	0	1.945910149	2.564949357	1.519826066	2.014903021	1.098612289	1.945910149	1.098612289	2.564949357	2.397895273	1.609437912	1.609437912
Transposon	TIR	MULE	MULE-MuDR	MuDR-14_SBi_grasrep	2.79728	2.79728	3.46574	6.89163	6.72623	6.54879	2.45101	2.79728	2.54945	0	0.693147	0.693147	0.693147	1.58697	1.13498	1.28093	0.693147	1.91692	4.77632	4.68213	4.78749	1.38629	0	0	1.79176	1.38629	1.79176	3.23689	2.79728	3.15506
Transposon	TIR	MULE	MULE-MuDR	MuDR-16_ALy_edcotrep	5.48618	5.91765	6.11907	4.87672	5.10257	5.0654	5.39168	5.24143	5.86489	3.40631	4.56435	5.11919	4.16777	4.7185	4.72246	0.693147	1.29928	0.693147	1.89712	2.61496	1.14513	2.98134	2.11453	2.07944	2.96675	3.50941	2.30259	5.74158	4.8109	5.10393
Transposon	TIR	MULE	MULE-MuDR	MuDr-1x_SP_spurep	2.708050201	2.243744441	2.442347035	2.114532344	2.221615789	2.114532344	2.028148247	2.32238772	2.036882362	1.887069649	1.704748092	1.717651753	6.17752909	5.749240108	5.835103092	3.791736088	3.628776415	3.699537455	2.240709689	1.686398954	2.197224577	3.516509218	3.153957498	3.258096538	2.197224577	1.686398954	1.734601644	4.534251891	5.018748956	4.958169383
Transposon	TIR	MULE	MULE-MuDR	MuDR-2_ECa_edcotrep	3.146305132	2.90416508	2.917770732	1.349925976	1.945910149	1.791759469	1.913649615	2.397895273	1.504077397	2.360854001	2.833213344	2.329492811	4.965637928	5.455321115	5.051988348	2.602689685	2.282382386	2.397895273	1.791759469	2.240709689	1.098612289	2.708050201	2.624668592	2.174751721	2.104134154	1.945910149	2.442347035	3.601042282	4.24563401	4.506454213
Transposon	TIR	MULE	MULE-MuDR	MuDR-2_FV_edcotrep	5.40268	5.54518	5.47227	3.4012	3.4012	3.17805	3.95124	4.09434	3.91202	3.2581	4.40672	5.0876	3.82864	4.2485	4.30407	0	0	0	0.693147	1.38629	0.693147	2.30259	1.79176	1.79176	0	0.693147	1.79176	3.95124	3.68888	3.82864
Transposon	TIR	MULE	MULE-MuDR	MuDR-21_VV_dcotrep	5.07583	4.86583	5.03442	4.36764	4.0571	3.80666	4.69987	4.45686	4.40609	3.68503	4.4786	4.87977	4.01143	3.99558	4.14259	1.57554	0.693147	1.02962	2.93964	2.54945	2.43612	2.55902	2.4375	2.96183	2.81495	3.3322	3.01553	4.89859	4.42634	4.90704
Transposon	TIR	MULE	MULE-MuDR	MuDr-3_HM_invrep	6.91461	6.8235	7.11108	5.20401	5.36726	5.2218	4.93583	5.15329	4.77606	4.42911	5.2291	4.90651	3.95801	3.75206	3.64741	3.76452	3.40674	3.43105	4.46502	4.87629	3.76672	3.17008	3.41005	3.4414	3.20403	3.23332	2.94444	5.15349	4.85024	4.99225
Transposon	TIR	MULE	MULE-MuDR	MuDR-4_GM_edcotrep	4.988485113	5.424950017	5.261653382	4.116322925	3.358056729	3.448764576	2.732742814	3.152736022	3.295836866	2.76000994	3.580428055	3.797733859	3.339321978	3.26448761	3.359604257	2.437500527	2.530166781	2.442347035	2.397895273	2.140066163	2.302585093	2.75805867	2.147709817	2.197224577	2.512302921	2.197224577	2.335374593	3.295836866	3.453157121	3.580428055
Transposon	TIR	MULE	MULE-MuDR	MuDR-5_VV_dcotrep	4.2711	3.71357	4.07754	3.99514	3.91202	3.85545	5.36247	5.44304	4.68973	4.54025	5.81114	5.03349	5.90185	5.47761	5.49922	2.61683	2.92023	3.29584	4.12713	3.94696	4.38559	4.66344	4.42485	4.75646	3.27083	3.12457	2.59026	3.76299	3.6853	4.67416
Transposon	TIR	MULE	MULE-MuDR	MuDR-7_ALy_edcotrep	1.550598322	1.553347869	1.491653877	1.335001067	1.400892291	1.493926046	1.76766143	1.272966076	1.996554376	5.484796933	1.098612289	1.694594904	1.386294361	1.845826164	2.228476659	0	1.098612289	1.098612289	1.526056303	1.098612289	1.704748092	1.098612289	2.197224577	1.533929576	3.044522438	3.012259936	2.913903806	1.945910149	1.4663363	1.216395324
Transposon	TIR	MULE	MULE-MuDR	MuDR-7_Mad_edcotrep	2.331572858	2.25878262	2.382627493	4.768563733	5.09598084	4.504846962	2.754571126	2.76361735	2.84987957	1.203971804	1.335001067	2.273597997	1.519826066	1.32175584	2.602689685	1.609437912	1.098612289	1.645156346	2.329492811	2.221615789	2.658348622	1.504077397	1.098612289	1.098612289	2.268683886	2.505525937	2.351375257	1.76766143	1.609437912	1.89256362
Transposon	TIR	MULE	MULE-MuDR	MuDR-7N1_ZM_grasrep	0	0	0	0	1.098612289	0	0	0	0	0	1.098612289	1.098612289	1.609437912	2.397895273	2.197224577	0	1.609437912	0	0	0	0	0	0	0	1.504077397	2.014903021	2.197224577	5.422744945	5.43590303	5.564520407
Transposon	TIR	MULE	MULE-MuDR	MuDR-8_Mad_edcotrep	4.95489	5.04435	4.58282	3.77365	3.84659	3.20403	4.95784	4.96683	4.51196	4.13946	5.48448	5.57653	4.56755	4.53413	4.46502	3.23587	2.35454	2.3383	3.91867	3.29584	3.50856	3.64632	3.65599	3.8712	2.07944	1.72924	2.0149	4.35474	4.37306	4.32722
Transposon	TIR	MULE	MULE-MuDR	MuDR-N3_BF_	4.30744	3.90197	4.20469	5.48583	5.72824	5.70295	3.17805	3.01226	2.82477	2.99573	3.58352	3.48636	3.02852	3.3673	3.07578	3.3322	2.5539	2.63906	1.72277	3.29584	2.66259	2.75154	2.90612	2.54945	1.79176	2.45674	2.63906	3.55535	3.94573	3.45789
Transposon	TIR	MULE	MULE-MuDR	MuDR1_HV_grasrep	5.40268	5.42053	5.45722	4.52991	4.483	4.26111	5.00915	4.90774	4.48381	3.06027	4.36945	4.61402	4.74369	4.49981	4.59368	0	0	0	1.8718	2.17475	1.70475	2.63906	1.28093	2.26868	2.97893	2.46081	2.23359	4.82831	4.69237	5.07048
Transposon	TIR	MULE	MULE-MuDR	MUDSOLT1_edcotrep	5.08623	5.28574	5.17048	3.82864	3.69511	3.91772	4.25166	4.46303	4.39445	2.11021	3.12457	3.90701	3.63004	3.71008	3.66995	0	0	0.693147	1.92529	1.72277	0.693147	1.74297	1.96611	1.94591	2.03688	1.79176	2.50844	4.23048	4.44768	4.23048
Transposon	TIR	MULE	MULE-MuDR	VANDAL13_athrep	4.67948	4.28013	4.34381	3.82137	3.91202	3.7495	4.33822	4.25662	4.16278	3.51651	4.56695	5.12226	4.16334	4.18532	4.48112	0	0.693147	0.693147	2.03688	1.91692	2.5177	2.77259	2.3979	2.81341	2.93386	1.28093	1.84583	3.78986	4.15888	3.98898
Retrotransposon	LINE	L1	L1	HAL1-1H_Cpo_rodrep	6.18031	6.15768	5.98069	4.78749	4.79082	4.19828	4.94977	5.03881	4.96584	4.48112	4.49088	5.91505	4.65586	4.49237	5.51074	4.68213	4.16278	4.66029	4.90774	4.95348	4.96517	4.15441	3.97029	4.22537	5.20034	5.0295	5.15714	4.90032	5.05199	4.92484
Retrotransposon	LINE	L1	L1	L1_AC_7_vrtrep	5.51444	5.23894	5.38964	4.4403	4.57176	4.49833	4.74442	4.76122	4.76669	4.70953	5.25933	5.46118	4.68675	4.65966	4.55697	4.84943	4.6944	4.05178	4.97969	4.33679	4.42162	4.30407	3.82864	4.10708	2.85263	3.32115	3.10234	4.46361	4.43379	4.40958
Retrotransposon	LINE	L1	L1	L1-1_JC_edcotrep	1.098612289	1.098612289	1.098612289	0	0	0	1.098612289	1.098612289	1.098612289	5.053509581	1.098612289	1.871802177	1.216395324	1.985914895	2.197224577	1.098612289	0	1.098612289	1.386294361	1.752538623	1.098612289	1.098612289	0	1.435084525	0	0	1.098612289	1.4663363	1.198695906	1.665006953
Retrotransposon	LINE	L1	L1	L1-1_PAb_plnrep	1.11923	1.70138	1.32687	4.08317	2.82336	2.95869	4.02367	3.961	3.97192	3.9468	4.2489	4.22107	4.44389	4.39492	4.39923	5.6906	5.60518	5.61232	4.34292	4.22506	4.2331	5.49642	5.49923	5.5049	0	0.693147	0	4.31828	4.44878	4.38596
Retrotransposon	LINE	L1	L1	L1-1_STu_edcotrep	5.51022	5.6326	5.56042	6.29163	6.30755	6.23415	6.19527	6.17399	6.15973	3.81671	5.16536	5.2157	4.96731	5.01417	5.07441	4.1972	4.23144	4.60833	5.94658	6.03913	5.97256	5.45804	5.25651	5.23729	5.23276	5.15566	5.12357	4.61649	4.79546	4.79506
Retrotransposon	LINE	L1	L1	L1-10_PI_plnrep	5.7142	5.54741	5.27585	0	0	0.693147	0	0	0	0	0	0	0	0	0	2.21297	1.63761	0.693147	0	0	0	1.63761	1.38629	1.96611	0	0	0	0	0	0
Retrotransposon	LINE	L1	L1	L1-11_PI_plnrep	0	0	0	0	0	0	2.708050201	2.944438979	2.833213344	4.143134726	5.283203729	5.132852927	1.098612289	1.098612289	0	0	0	0	0	0	0	0	1.098612289	0	0	0	0	1.098612289	0	0
Retrotransposon	LINE	L1	L1	L1-11_STu_edcotrep	5.13094	4.61347	5.01693	3.41646	2.47506	3.16515	3.53612	3.94849	4.32744	1.95881	2.77259	2.49595	2.67644	2.20573	2.73437	3.98327	3.85621	3.90868	4.2485	4.37733	4.39907	4.10039	4.03899	3.8712	2.31912	2.16645	2.07944	2.83103	2.40323	3.29053
Retrotransposon	LINE	L1	L1	L1-112_DR_zebrep	1.360976553	1.681758574	1.72066439	4.437934267	5.461710913	4.374039825	2.197224577	1.845826164	2.197224577	2.595254707	1.725509262	1.871802177	2.131627125	2.68881981	1.757857918	1.791759469	1.32175584	2.251291799	1.349925976	1.098612289	1.098612289	2.48490665	1.909542505	2.833213344	2.397895273	2.351375257	2.014903021	1.945910149	2.433613355	2.649212731
Retrotransposon	LINE	L1	L1	L1-12_ALy_edcotrep	1.098612289	1.223775432	1.4663363	1.974081026	1.36687706	1.686398954	1.496643165	0	1.504077397	1.098612289	1.504077397	1.791759469	1.098612289	1.386294361	1.582409925	4.828313737	5.231108617	4.472780998	1.609437912	1.421386371	1.299283893	5.556828062	5.099866428	4.442651256	1.098612289	0	0	1.098612289	0	1.098612289
Retrotransposon	LINE	L1	L1	L1-13_GM_edcotrep	2.93222	3.19575	2.89037	2.49674	3.3322	3.42318	4.36628	4.57912	3.81299	4.92906	6.00697	5.91755	4.90342	4.81421	4.9218	3.41225	2.63906	3.37872	3.20545	3.09708	3.2581	5.06733	5.04986	4.95759	2.81341	2.33537	2.77259	3.975	4.00733	3.68051
Retrotransposon	LINE	L1	L1	L1-1A2_Sar_mamrep	9.13069	9.28889	8.4673	3.95843	5.4999	2.53898	3.85015	5.04343	3.32023	1.79176	3.45527	4.44656	2.03688	1.89712	2.99573	5.53075	4.55388	4.50351	2.15948	2.36713	2.99573	1.89712	1.29928	2.3557	6.78672	6.02908	5.85533	3.14988	4.77632	4.31303
Retrotransposon	LINE	L1	L1	L1-1B_Opr_mamrep	5.03695	4.66658	5.10854	3.46574	3.12926	3.2581	4.19469	4.23618	3.78419	3.79709	3.39003	4.83401	3.16407	3.51651	4.2237	3.72167	3.15396	3.24019	4.14313	4.1795	3.66589	3.06027	3.98368	3.67207	4.37486	4.53106	4.49663	3.60705	3.31419	3.79174
Retrotransposon	LINE	L1	L1	L1-2_PAb_plnrep	1.79176	1.38629	0.900787	2.41591	1.805	1.62992	4.29344	4.2554	4.25196	3.0263	3.08029	3.11725	2.40735	2.03432	2.25205	5.90308	5.87054	5.88385	4.52227	4.51904	4.52942	5.96518	5.97969	5.94871	0.693147	0	0	3.18864	2.92371	2.84158
Retrotransposon	LINE	L1	L1	L1-2_SMo_plnrep	1.72277	2.03688	1.16315	5.16192	5.27939	5.2575	3.66722	3.24519	3.45677	2.11021	2.19722	1.94591	1.09861	0.693147	0.693147	1.29928	1.67398	0.693147	2.42037	2.89037	2.50844	1.65823	1.94591	0.693147	4.0355	4.20965	3.55535	3.06805	3.3673	3.19185
Retrotransposon	LINE	L1	L1	L1-2_STu_edcotrep	4.40794	4.18868	4.01842	5.99468	5.76552	6.03035	6.20382	6.15292	6.0393	3.87365	3.22154	3.42888	3.97656	3.80666	3.4889	3.7013	3.47816	3.75342	5.84619	5.70846	5.63734	3.14899	3.81482	3.35067	4.89328	4.98301	5.00106	4.44768	4.48703	4.45801
Retrotransposon	LINE	L1	L1	L1-20_CPa_edcotrep	2.47694	2.99573	2.584	4.10134	4.13071	5.05897	3.24843	2.98946	3.46126	1.66501	1.83258	1.17007	2.20461	1.85238	2.12823	1.95881	0.944462	0.693147	3.42937	3.56483	3.44362	1.89712	1.67398	1.7346	2.26868	2.85263	1.88273	1.34373	1.70475	1.74297
Retrotransposon	LINE	L1	L1	L1-21_Lch_vrtrep	1.098612289	1.098612289	1.098612289	1.098612289	1.098612289	1.098612289	1.098612289	1.815290432	1.098612289	4.128209613	4.416301242	6.03787092	1.098612289	1.421386371	1.098612289	0	1.098612289	1.098612289	0	0	1.098612289	1.098612289	1.098612289	0	0	0	1.265665091	1.098612289	1.098612289	1.098612289
Retrotransposon	LINE	L1	L1	L1-24C_ACar_vrtrep	5.12132	4.9303	4.90332	3.68888	3.92287	3.8636	3.98252	4.29118	4.09434	4.00299	3.66205	4.36639	3.41225	3.64051	4.11001	3.2581	4.23893	3.87498	4.07254	4.17348	3.87498	3.60352	3.11221	2.65835	4.60684	5.11399	4.355	3.52636	3.95714	3.69165
Retrotransposon	LINE	L1	L1	L1-25_ACar_vrtrep	5.50736	5.31444	4.84979	3.71965	3.83406	3.7317	4.11904	4.30744	4.42185	3.78419	3.3673	5.07517	3.47462	3.4095	4.23048	3.48124	3.51898	3.68888	4.09434	3.79424	4.09017	2.42775	3.24705	3.44202	4.13517	4.35028	4.33073	4.26619	4.483	4.03326
Retrotransposon	LINE	L1	L1	L1-2a_MD_mamrep	4.760548683	5.023492288	4.907494535	3.819648911	3.305886202	3.309849342	2.145398978	2.925690638	2.749294506	2.104134154	2.440275326	2.422667705	6.735570966	6.744335944	6.62783236	4.422120764	4.631295918	4.564348191	2.532020807	2.790803079	2.48490665	4.956531035	4.950177325	4.936629881	3.053552968	3.288401888	3.295836866	5.791399502	5.777308611	5.843544417
Retrotransposon	LINE	L1	L1	L1-3_CR_chlrep	1.44692	1.3173	1.70475	4.74493	4.55458	5.02508	0	0	0.693147	1.31219	0	0	0	1.30625	0	0	0	0	0	0	1.29928	0	0	0.693147	0	0	0	0	1.29928	1.14513
Retrotransposon	LINE	L1	L1	L1-3_GM_edcotrep	3.387210013	3.68227771	3.23065814	2.564949357	2.620078363	2.803360381	4.591747503	4.502187951	4.029653141	3.882907225	5.200820297	5.045036721	3.585150939	3.278042443	3.244153632	3.330102302	2.68881981	3.147023154	3.715786686	3.5767908	3.615232914	3.456073749	3.513334882	3.571876427	1.4663363	2.302585093	2.54099551	4.358132172	4.34668698	4.344934654
Retrotransposon	LINE	L1	L1	L1-3_PAb_plnrep	1.241713577	1.174118568	1.178654996	0	0	1.349925976	2.023377676	2.261374481	2.098490208	2.773032374	3.171016627	3.152859946	2.581011968	2.539402726	2.500271339	5.506939998	5.377281031	5.395090113	2.485747962	2.37389408	2.359074116	5.012613336	4.992111449	4.998468241	0	0	0	2.645060702	2.651585664	2.620798795
Retrotransposon	LINE	L1	L1	L1-34_DR_zebrep	5.84788	5.54257	5.78894	3.93634	4.47082	3.56825	4.36182	4.61512	4.48815	4.64439	3.91602	5.3222	3.46126	3.78116	4.70296	3.62946	3.75081	4.57752	4.57067	4.49443	4.53845	3.81318	4.2403	3.38125	4.91466	4.66186	4.85981	3.97343	4.29242	4.23411
Retrotransposon	LINE	L1	L1	L1-36_ACar_vrtrep	5.20894	5.02315	4.93756	4.1454	3.59357	3.14272	3.93987	3.91999	3.11721	4.47734	3.81036	4.68213	3.22458	4.36036	4.93687	3.49651	3.11906	3.67727	3.73767	3.99333	3.8712	3.85251	3.64109	4.30407	4.04464	4.18325	3.82675	3.16688	4.35243	3.87875
Retrotransposon	LINE	L1	L1	L1-37_AAe_invrep	7.09525	6.92731	6.79992	5.44781	5.51846	4.93087	5.99645	6.1591	5.76754	5.10291	5.10595	6.87446	5.287	5.3959	6.0129	5.46489	4.88658	5.51846	6.15433	6.2106	5.94149	4.8997	5.40268	4.81826	6.2186	6.13286	6.03495	5.46489	5.65073	5.41857
Retrotransposon	LINE	L1	L1	L1-39_DR_zebrep	5.00952	5.16397	5.20558	3.83586	3.011	3.32195	4.66029	4.60517	4.14049	3.56752	2.87168	5.03509	2.81091	3.06027	3.44343	3.93183	3.39003	3.26903	3.67515	4.23203	4.10853	2.17125	2.73003	2.92674	4.55237	3.80983	4.42784	3.41225	3.75342	4.07187
Retrotransposon	LINE	L1	L1	L1-4_PAb_plnrep	3.18956	3.56145	3.30567	2.47654	2.41591	1.38629	4.23149	4.27235	4.29622	2.88861	3.4173	3.10009	2.87362	2.93339	3.16919	5.84544	5.77683	5.81702	4.54019	4.48799	4.5409	5.86873	5.87713	5.85879	0.693147	0.693147	0.693147	3.37398	3.15221	3.12981
Retrotransposon	LINE	L1	L1	L1-40_AAe_invrep	5.071416766	4.556505014	4.275121872	1.098612289	1.871802177	1.098612289	2.251291799	1.098612289	1.280933845	3.109060959	2.024381953	2.983153491	1.36330461	1.665006953	2.197224577	1.504077397	1.435084525	1.791759469	1.098612289	1.4663363	1.098612289	2.00148	1.927891644	2.268683886	2.197224577	1.887069649	2.944438979	1.609437912	1.815290432	1.326870737
Retrotransposon	LINE	L1	L1	L1-42_ACar_vrtrep	4.848116365	5.117035269	5.339723191	2.813412717	2.564949357	2.833213344	3.635391648	4.285466174	3.84261076	1.922787732	1.860752118	2.525728644	2.665789672	2.875641577	2.649983139	1.349925976	1.780585607	1.504077397	1.531476371	1.945910149	1.575535671	2.372789097	2.677975799	1.871802177	1.655422239	1.499953349	1.32175584	2.226424092	1.845826164	2.197224577
Retrotransposon	LINE	L1	L1	L1-44_XT_	5.45471	5.14333	5.28754	3.95714	4.44656	4.04012	4.35671	4.82276	4.62676	5.3125	4.78749	6.18367	4.51186	4.65616	5.21436	4.17083	3.99689	3.63759	4.59848	4.42715	4.76807	4.3388	4.46014	4.21951	4.94571	4.8699	4.89512	4.42684	4.70048	4.67928
Retrotransposon	LINE	L1	L1	L1-46_AAe_invrep	7.9278	7.71244	7.7074	6.00071	5.78074	5.29832	6.34388	6.45873	6.11865	6.82356	5.41037	6.80116	5.8186	6.06204	6.25958	5.75644	5.29957	5.96165	6.49602	6.51212	6.38688	5.15081	5.98141	5.40605	6.82002	6.90048	6.73102	5.34165	6.18031	5.9162
Retrotransposon	LINE	L1	L1	L1-48_DR_zebrep	5.019595035	4.872874016	5.039734444	3.236715743	3.437378223	3.119912581	2.880747818	2.789120073	2.744420702	2.295895769	2.43645143	2.93562658	2.781480325	2.619707029	2.842709291	1.804497989	1.567177384	1.911719393	1.223775432	2.040655234	1.913649615	2.061422673	1.972343406	2.272731887	2.212973247	2.260025131	2.235690732	3.133139271	2.915308243	3.119762422
Retrotransposon	LINE	L1	L1	L1-49_NN_edcotrep	4.44691978	4.414450261	5.160204064	3.17805383	3.263577643	2.785011242	2.582547445	3.101091789	2.956065861	3.555348061	4.046941935	3.835860925	4.797442074	5.037387573	5.137267945	3.028523709	3.270834298	2.910991045	2.730026934	2.328180712	2.491294537	3.380994674	3.978641861	3.761200116	3.351853064	2.956747133	4.197201948	3.129261791	3.141273138	3.449987546
Retrotransposon	LINE	L1	L1	L1-53_DR_zebrep	5.17737	5.00187	5.0185	4.18434	4.06862	3.9881	3.44189	3.5352	3.37021	3.41167	3.55891	3.86598	2.91099	2.86684	3.40262	3.16035	2.94952	3.15208	3.83498	3.52995	3.48343	2.92591	3.03769	2.93022	3.66356	3.46574	3.41419	3.04452	3.18968	3.32424
Retrotransposon	LINE	L1	L1	L1-55_ACar_vrtrep	5.17953	5.12762	4.97259	3.95672	3.93672	3.26903	4.50811	3.92426	4.14086	3.30998	2.61496	4.45046	3.58352	4.2237	3.83198	3.60414	3.26903	3.82864	4.12354	4.4102	3.86073	2.83321	3.44468	2.69848	4.34812	4.3631	4.61086	3.8122	3.68331	3.77276
Retrotransposon	LINE	L1	L1	L1-55_XT_	4.92635	5.115	4.72999	3.09104	3.47816	3.2581	5.93973	6.03069	5.52654	4.62382	6.37518	6.2116	4.09226	4.11197	3.68015	3.56247	3.89367	3.79324	4.82028	4.85852	4.31812	4.63796	4.9312	4.96221	3.05636	2.7379	3.14988	6.1185	6.07304	5.95819
Retrotransposon	LINE	L1	L1	L1-56_DR_zebrep	5.02596	4.90602	4.93591	4.86397	5.05772	5.0895	3.94204	3.99093	3.78872	3.71214	4.08766	3.94481	3.39512	3.16279	3.14988	3.62434	2.90508	3.23212	2.8184	2.94444	2.21664	3.82468	3.94696	3.24357	2.77259	2.48491	2.62708	4.21295	4.25135	4.60231
Retrotransposon	LINE	L1	L1	L1-59_DR_zebrep	4.7863	5.09375	4.37144	3.32023	3.07269	2.84491	3.46092	3.89589	3.12926	3.55535	2.48491	3.89046	2.27213	3.11935	3.76892	2.70197	3.2581	3.57422	4.25325	3.7297	3.51453	2.48491	2.8679	2.61007	4.89485	3.88156	3.93934	3.51651	3.37522	2.60487
Retrotransposon	LINE	L1	L1	L1-6_MD_mamrep	2.164964207	2.1690537	2.923161581	1.533929576	1.098612289	1.386294361	1.098612289	0	1.349925976	5.082782297	1.609437912	2.63905733	1.985914895	2.360854001	2.351375257	1.550598322	1.658228077	1.504077397	0	0	1.098612289	1.098612289	1.791759469	2.014903021	1.098612289	1.098612289	1.704748092	1.504077397	2.140066163	0
Retrotransposon	LINE	L1	L1	L1-6_ZM_grasrep	4.683981366	4.143134726	4.584967479	1.44238401	1.265665091	1.315676062	1.241713577	1.098612289	1.386294361	1.609437912	1.609437912	1.545924999	1.098612289	1.386294361	1.098612289	0	0	0	1.504077397	0	1.609437912	0	1.098612289	1.098612289	1.098612289	1.098612289	0	6.165417854	6.836259277	6.146329258
Retrotransposon	LINE	L1	L1	L1-61_ACar_vrtrep	4.53413	4.79697	5.3822	4.86946	4.97969	4.95759	4.48676	4.14666	5.05716	2.80611	4.11321	4.82831	3.93032	3.86423	3.53087	0.693147	1.04145	0	1.46634	2.15948	1.47591	2.41591	2.42775	1.51983	2.42775	1.64412	3.00992	5.03857	5.00562	5.12056
Retrotransposon	LINE	L1	L1	L1-61_DR_zebrep	5.139	5.23354	4.34381	1.38629	0	0	1.55537	1.79176	1.55335	0	0	1.89712	1.38629	0.693147	1.38629	0	0	0	0.693147	0	1.06784	1.38629	0.693147	1.79176	0.980831	1.02962	1.0033	1.38629	1.28093	1.33977
Retrotransposon	LINE	L1	L1	L1-67_ACar_vrtrep	7.56385	7.58448	7.42058	6.06909	6.01755	5.59471	6.40263	6.62274	6.35871	5.82379	5.75935	7.25033	5.05625	5.92892	6.12936	5.4474	4.98886	5.47162	6.19032	5.78264	6.4186	5.6912	5.94999	5.9551	6.73993	6.7809	6.55251	5.96101	6.09582	6.07304
Retrotransposon	LINE	L1	L1	L1-7_Cis_invrep	4.36945	4.82671	5.23431	3.8111	3.50255	3.16125	4.17746	3.68888	3.63279	3.87812	3.79324	5.03435	2.87168	3.73767	4.35243	3.73767	3.85439	3.61989	4.10539	3.98155	4.08317	3.56105	3.45316	3.50255	4.2312	3.19867	3.84588	4.18965	3.37043	4.25986
Retrotransposon	LINE	L1	L1	L1-7_CR_chlrep	2.917770732	3.020424886	2.970414466	2.240709689	2.397895273	2.602689685	2.564949357	2.014903021	2.397895273	6.331145915	3.005682604	4.168214411	3.186352633	3.673765816	3.601868986	2.48490665	2.32238772	2.397895273	2.533696814	2.564949357	2.433613355	3.663561646	3.339321978	3.795489189	2.734367509	2.772588722	3.135494216	3.433987204	3.169685581	2.76000994
Retrotransposon	LINE	L1	L1	L1-7_STu_edcotrep	0.980831	0.693147	0.693147	3.40901	3.05891	3.26236	4.66254	4.70048	4.45076	2.06142	2.23359	2.18864	2.75457	2.19722	2.67798	2.51389	2.53017	1.8718	5.3043	5.11452	4.82415	0.693147	2.42154	2.35454	1.25276	1.38629	1.06784	2.41866	2.9245	2.23907
Retrotransposon	LINE	L1	L1	L1-71_ACar_vrtrep	5.84727	5.68273	5.69997	4.47082	4.5254	4.09909	3.95124	4.12713	3.8889	2.65926	3.88303	4.09909	3.55126	3.61477	3.55126	0.693147	0.693147	1.58045	0.693147	1.0033	1.04145	0.693147	2.21297	1.29098	1.84583	1.69168	1.28093	3.95551	3.53806	3.83346
Retrotransposon	LINE	L1	L1	L1-9_GM_edcotrep	5.200566711	4.781523971	5.206750173	3.677143355	3.45946629	3.295836866	5.267553989	5.333737598	4.805969964	5.291071176	6.654888074	6.032460127	4.676560182	4.574710979	5.149428652	5.206569335	4.767416578	4.616436482	4.60693363	4.718498871	4.369447852	5.553513695	5.176149733	5.18178355	3.258096538	3.254594258	3.468572501	5.302752517	5.096084897	5.286371296
Retrotransposon	LINE	L1	L1	L1-93_Cis_invrep	5.18178	5.28047	4.96981	2.99573	3.2581	3.21219	3.82071	4.08877	3.5443	3.05243	2.79902	4.24188	2.41591	2.54945	3.74132	3.2581	3.08274	3.11034	3.30199	3.09104	3.23689	1.75786	2.5337	2.50144	3.92729	3.60187	3.7612	2.94921	3.12676	3.59357
Retrotransposon	LINE	L1	L1	L1-95_ACar_vrtrep	4.13859	4.84979	5.18018	4.59656	3.81404	4.40672	4.01096	4.10978	4.79165	3.50941	4.33312	5.1607	4.43421	4.1869	4.45435	2.38482	2.33537	1.75786	2.59525	1.22378	2.10413	2.30259	1.79176	1.68176	2.83855	3.11668	2.81341	4.73369	4.17439	4.19431
Retrotransposon	LINE	L1	L1	L1-95_Cis_invrep	5.62281	5.27811	4.5719	3.77659	3.75342	3.61631	4.44656	4.46207	3.89182	3.21888	3.20545	4.84156	2.95491	3.57235	3.71135	3.00403	3.14988	3.96651	3.65498	3.31419	3.82137	3.12676	2.5123	2.61496	4.37366	4.33511	4.36097	3.75342	3.87812	4.03129
Retrotransposon	LINE	L1	L1	L1-N3_FV_edcotrep	7.56673	7.55946	7.42655	5.55914	5.31485	5.70511	6.42714	6.35541	6.04501	6.7372	7.50923	7.53412	6.80639	6.8969	6.90093	4.52613	4.68213	4.70773	4.75359	4.64054	4.70048	7.0639	7.12383	7.09838	5.77082	5.75194	5.70511	6.69555	6.60014	6.60394
Retrotransposon	LINE	L1	L1	L1A-2_MD_mamrep	4.90209	4.68213	5.0123	2.70805	3.19867	2.71409	1.69168	2.23359	1.99243	1.54045	1.88273	2.20728	2.81341	2.92674	2.37955	0	0.693147	0	0	0.693147	0	0	0	0	0.693147	0	0	2.92162	2.07944	2.90612
Retrotransposon	LINE	L1	L1	LINE_CH_mamrep	3.61919974	3.847102545	4.143134726	2.397895273	2.676800303	2.611201505	3.627413541	3.218875825	3.120896887	5.294740979	3.638969413	4.210958025	4.220637949	3.927459251	4.331506725	3.253814305	3.168390625	3.318373588	2.708050201	2.961828998	2.813412717	2.926741188	3.208825489	3.295836866	3.083436327	3.243193733	3.290124284	3.113515309	3.509411821	3.458497267
Retrotransposon	LINE	L1	L1	LINE1-60_SBi_grasrep	2.694627181	2.610069793	2.384822928	0	0	0	0	1.098612289	0	1.098612289	0	1.609437912	1.098612289	0	0	0	1.098612289	1.098612289	1.098612289	1.098612289	1.421386371	1.252762968	1.098612289	1.098612289	5.0360236	4.643515516	5.074279666	1.098612289	1.098612289	1.098612289
Retrotransposon	LINE	L1	L1	RIL_ATLINE1_10A_PIER	3.316779004	3.295836866	2.89652501	1.386294361	1.791759469	1.945910149	1.098612289	1.098612289	1.504077397	1.609437912	1.421386371	1.315676062	5.308817051	4.655016935	4.791649753	1.824549292	2.00148	1.516348465	1.098612289	1.609437912	1.098612289	2.45673863	1.712977772	1.722766598	1.098612289	1.945910149	1.791759469	3.751854253	3.657130756	4.189654742
Retrotransposon	LINE	L1	L1	RIL_LINE-2_SMo_PIER	3.392829132	3.188416617	3.218875825	4.828313737	5.192956851	5.093750201	3.248434627	2.983153491	3.33220451	1.981001469	2.583997552	2.463853241	1.945910149	2.217225442	2.507377283	2.48490665	1.832581464	2.621038824	2.931193752	2.876385516	3.135494216	3.314186005	3.068052935	2.691243083	4.073291153	4.01186834	4.327438444	4.102643365	4.166665224	3.826663354
Retrotransposon	LINE	L1	L1	RIL_LINE1-60_SBi_PIER	1.987874348	2.379546134	2.212973247	1.098612289	0	0	1.504077397	1.098612289	0	1.504077397	0	1.098612289	0	0	1.098612289	1.098612289	1.098612289	1.098612289	1.098612289	1.098612289	1.098612289	0	1.098612289	1.098612289	4.994309416	5.063499687	5.041578251	1.098612289	1.098612289	0
Retrotransposon	LINE	L1	L1	RIL_SHALINE2_MT_PIER	1.06784	1.72722	1.92181	0.693147	1.47331	1.79176	0	0	0.693147	1.38629	0	1.38629	3.96217	4.61436	4.21641	1.33977	2.07944	0	0	0	0.693147	1.02962	1.0033	1.51413	0.693147	0	0	5.16841	5.80413	5.18084
Retrotransposon	LINE	L1	L1	RIL_VLINE3_VV_PIER	1.77834	1.99243	1.64223	1.49549	0.693147	1.06784	3.59273	2.80336	3.29584	3.69654	5.75995	5.139	4.31141	4.43082	4.04524	2.3896	1.93284	0.693147	2.20728	2.67728	2.92998	3.63429	3.43801	3.65928	2.05412	2.36713	2.59931	2.76116	3.16407	2.28424
Retrotransposon	LINE	L1	L1-Tx1	Tx1-1_CGi_invrep	6.45666	6.31219	6.17691	4.95454	5.10098	5.41075	5.99832	6.04234	5.38862	5.8038	6.03219	5.91789	5.52184	5.51343	5.83846	5.45532	5.3452	4.98543	4.93904	4.3535	4.48441	5.44366	5.75113	5.72951	4.49184	4.24563	4.80566	6.17295	5.66157	5.42993
Retrotransposon	LINE	L1	L1-Tx1	Tx1-10_CQ_invrep	4.46207	4.5254	3.86741	3.4012	3.16407	2.68558	3.29584	3.79174	3.84303	3.13549	3.17805	5.01728	3.98155	4.03719	4.40323	3.39003	3.43399	3.16407	3.81404	4.04888	3.66356	4.00125	3.49651	3.34639	3.85015	3.83586	3.66356	2.73003	2.81704	3.20791
Retrotransposon	LINE	L1	L1-Tx1	Tx1-11_CGi_invrep	4.6323	4.69346	4.69627	3.84099	3.38197	2.90732	5.24965	4.81939	5.19203	5.42432	6.00256	5.94984	4.13701	4.07641	3.98613	3.36499	3.37112	3.36499	4.99213	4.92725	4.43265	4.84222	4.4328	4.58025	2.91777	2.40486	2.73003	5.62144	4.95465	4.42551
Retrotransposon	LINE	L1	L1-Tx1	Tx1-2_DR_zebrep	5.90725	6.3391	6.1909	3.76892	3.70793	3.99514	4.88927	5.08052	3.82351	3.54228	3.39003	5.35659	2.70805	3.68051	4.60517	4.18965	3.89473	4.6137	5.01823	4.76095	5.02388	2.96183	3.42318	3.48636	5.41292	5.40653	5.51074	4.00236	4.16408	4.41482
Retrotransposon	LINE	L1	L1-Tx1	Tx1-2_LCh_vrtrep	4.369447852	3.401197382	3.610917913	1.609437912	1.098612289	1.098612289	1.098612289	1.098612289	1.098612289	1.098612289	1.098612289	1.609437912	1.386294361	0	1.609437912	1.609437912	1.098612289	2.014903021	0	0	0	5.153291594	4.475711631	4.553876892	1.349925976	2.131627125	1.609437912	0	0	0
Retrotransposon	LINE	L1	L1-Tx1	Tx1-20_DR_zebrep	4.7458	5.14749	5.06939	3.81036	4.17219	3.23024	4.34597	4.62986	3.98508	3.96081	5.85179	6.11621	3.69793	4.06903	4.59236	3.66783	3.90629	3.885	4.99914	4.66501	4.80402	3.85923	4.09434	3.4761	4.29729	4.84306	4.33511	4.15627	4.55237	3.8712
Retrotransposon	LINE	L1	L1-Tx1	Tx1-25_DR_zebrep	2.449987339	2.809402695	2.599833759	1.349925976	1.880313545	1.098612289	1.725509262	1.554628972	1.757857918	1.882731465	1.686398954	1.550598322	5.22721334	5.453182077	4.579852378	3.520460802	3.314186005	3.676300672	1.609437912	1.945910149	1.665006953	2.242946547	2.649212731	3.020424886	1.098612289	2.197224577	1.871802177	5.898331745	5.665041646	5.798334792
Retrotransposon	LINE	L1	L1-Tx1	Tx1-3_DR_zebrep	5.01595	4.66932	4.58256	3.48636	3.31054	2.86537	3.81991	3.93834	3.23737	3.41225	2.18122	4.55538	2.40323	2.34857	3.06898	2.74544	2.65089	3.28149	3.38777	2.80672	3.61092	2.43838	2.23907	2.09495	3.94898	3.7287	3.77563	3.20337	3.07658	2.93049
Retrotransposon	LINE	L1	L1-Tx1	Tx1-34_DR_zebrep	5.03695	4.42684	4.29667	4.67096	4.6217	4.91559	4.74493	4.00733	4.17182	4.38203	4.94164	4.93687	5.59471	5.01948	5.6618	4.72147	4.62823	4.70653	3.87812	4.31749	4.25797	4.82296	5.00618	5.02826	4.2485	4.30407	4.2244	4.89784	4.61841	3.92855
Retrotransposon	LINE	L1	L1-Tx1	Tx1-4_DR_zebrep	4.99043	4.55738	4.67283	3.20158	3.61989	2.82138	4.42285	4.19397	4.42285	3.7612	3.7612	5.14943	3.25037	3.90533	4.43082	3.49043	3.43399	3.97406	4.31303	4.36522	4.2485	3.7281	3.37872	2.97893	3.71135	3.44275	3.63759	4.01337	3.91202	4.08877
Retrotransposon	LINE	L1	L1-Tx1	Tx1-4_SK_invrep	5.69432	5.8522	5.93921	5.02607	4.23542	4.55738	5.34233	4.7318	4.50719	4.95112	4.06044	6.00717	3.63466	4.51961	5.62522	4.31214	4.28063	4.98588	5.32463	5.21494	5.21494	3.20053	3.63759	3.93183	5.85984	4.98981	5.68131	4.65396	4.37518	4.94402
Retrotransposon	LINE	L1	L1-Tx1	Tx1-43_DR_zebrep	2.427745295	2.360854001	2.694627181	2.505525937	2.243744441	2.602689685	3.250374492	2.751537441	2.344549155	3.555348061	4.266194819	4.294365501	5.122772794	5.025195445	4.89496253	2.451005098	2.542727344	1.85629799	2.448536536	2.131627125	1.89256362	3.084525812	2.882401188	2.036882362	1.904238091	2.397895273	2.602689685	3.100092289	2.516453765	2.522082003
Retrotransposon	LINE	L1	L1-Tx1	Tx1-45_DR_zebrep	5.26528	5.30455	5.18303	4.55124	4.64164	4.55838	5.13874	4.97597	5.1402	3.67449	4.17083	5.31567	4.73839	4.99552	5.0662	1.28093	0.693147	0.693147	2.61007	2.81341	2.44235	2.5539	2.82477	2.69848	3.61477	3.53612	3.50656	4.66579	4.62216	4.40183
Retrotransposon	LINE	L1	L1-Tx1	Tx1-47_DR_zebrep	4.61347	4.33551	4.44656	3.3322	3.50656	3.24519	4.58788	4.65396	4.56435	4.36097	3.32023	5.16397	3.03655	3.93183	4.42285	3.3322	2.59026	3.95763	4.14841	4.10853	4.46973	3.41225	3.04452	2.99573	4.01337	4.0555	3.85923	3.69654	3.91867	4.40672
Retrotransposon	LINE	L1	L1-Tx1	Tx1-5_CQ_invrep	6.41959	6.17691	6.22456	4.45124	4.99043	4.2999	5.40155	5.53733	4.9047	4.76431	3.8471	6.52686	4.55651	5.07985	5.87704	4.76003	4.2485	4.7728	5.40829	5.40941	5.32057	4.12713	4.50258	4.33073	5.64721	5.42495	5.28193	5.06101	5.06119	5.28827
Retrotransposon	LINE	L1	L1-Tx1	Tx1-5_DR_zebrep	5.28438	5.09139	5.6748	3.85015	3.57422	3.56752	3.85015	4.0355	3.22331	3.3322	2.89037	5.00299	3.3499	3.40489	3.65785	4.40323	4.21951	3.90868	4.90032	4.29729	4.12713	4.12252	4.36945	4.28588	4.07754	3.87812	3.99675	3.07797	4.25325	3.37522
Retrotransposon	LINE	L1	L1-Tx1	Tx1-8_LCh_vrtrep	1.609437912	1.098612289	2.197224577	0	0	1.098612289	1.098612289	1.609437912	1.717651753	0	1.945910149	1.609437912	1.386294361	0	1.098612289	4.01766868	3.692445588	4.123903364	0	0	1.945910149	5.402677382	5.254887809	4.793424111	2.197224577	1.098612289	0	1.945910149	1.945910149	1.609437912
Retrotransposon	LINE	L1	L1-Tx1	Tx1-9_SK_invrep	6.18738	5.88123	5.92196	4.35671	4.58205	3.7202	5.04619	5.24552	5.11542	5.28151	4.68213	5.9698	4.93878	4.74119	5.50765	4.49663	4.10853	4.50298	4.94368	5.09463	5.08052	4.64118	4.40265	4.40265	5.39622	5.064	5.34982	4.39268	4.87009	4.93926
Retrotransposon	LINE	L1	L1	VLINE3_VV_dcotrep	1.67896	1.87692	1.42266	1.38629	0.693147	1.33977	2.97553	2.89037	3.46051	3.35185	5.2688	5.22867	4.06669	4.21415	3.975	2.10191	2.3383	0.693147	3.3322	3.05289	3.3825	3.38862	3.32324	3.69718	1.89712	1.84583	2.26868	2.51476	2.53898	2.54375
Retrotransposon	LINE	L2	L2	CSP2096_spurep	4.021773869	3.941581808	3.683866912	2.397895273	2.833213344	2.525728644	3.218875825	3.169685581	3.258096538	4.102643365	4.821893169	5.164785974	4.310799125	4.731802837	4.787491743	4.248495242	2.970414466	3.701301974	3.044522438	3.218875825	3.380994674	4.952299717	4.532599493	4.562262685	2.397895273	2.197224577	2.140066163	3.384390263	3.044522438	3.701301974
Retrotransposon	LINE	L2	L2	Daphne-15_CTe_invrep	4.27944	4.51086	4.20635	4.24492	3.8373	4.2697	4.02535	4.01096	4.19302	4.06732	4.89784	5.00618	4.2885	4.31005	4.31005	3.73237	3.975	3.69993	3.99718	3.74295	4.11632	4.49424	4.30106	4.44559	3.64284	3.50656	3.71357	4.37261	4.1829	4.18965
Retrotransposon	LINE	L2	L2	Daphne-16_CTe_invrep	5.27172	5.02716	4.72073	3.34795	3.28342	3.08089	3.65713	3.96556	3.56953	4.74866	3.63759	4.18965	2.60269	2.80336	3.78419	3.45789	3.24843	3.46574	3.91202	4.02535	3.63099	2.77259	2.87437	2.70805	4.68675	4.50811	4.81567	3.92527	3.8712	4.00733
Retrotransposon	LINE	L2	L2	Daphne-16_HMa_invrep	5.9091	6.53572	6.59919	4.77311	4.79785	4.09672	3.55177	4.31482	3.91202	2.74727	3.50941	4.46878	4.0555	4.04556	3.70306	0.693147	0.693147	1.28093	0.693147	1.38629	0	1.60944	1.84583	1.79176	1.29928	1.72277	2.42775	4.54566	4.23299	4.64652
Retrotransposon	LINE	L2	L2	Daphne-18_HM_invrep	5.82597	5.91719	5.69072	4.35587	4.3959	4.41603	3.17117	3.48395	3.4739	2.03596	3.16158	3.26187	2.7463	2.83654	2.75625	1.0116	1.67398	1.28785	1.58146	1.44692	1.50136	1.61892	1.71696	1.79176	1.32005	1.54314	1.26369	3.77858	3.91456	3.76434
Retrotransposon	LINE	L2	L2	Daphne-2_HMM_invrep	5.833555564	5.929448176	6.384934669	5.507868964	5.493061443	5.474490896	3.843030848	3.532225644	3.800718191	3.479527855	4.601831619	4.859812404	2.288196066	2.242946547	3.025291076	2.908719078	2.789488857	3.012259936	2.614962217	3.344037791	3.238678452	3.044522438	3.460512912	3.446807893	1.92181211	2.1690537	1.763588021	4.405363451	4.715521228	4.826976844
Retrotransposon	LINE	L2	L2	Daphne-26B_LMi_invrep	5.97699	5.64368	5.62402	3.90533	4.3468	4.57324	4.95759	4.63889	5.03509	4.46014	4.13916	5.73253	4.00993	4.33073	5.41943	4.64164	4.04556	4.37126	4.2485	4.80167	4.63715	3.95672	3.99951	4.02024	4.99043	4.8941	4.9355	4.7362	5.068	4.73369
Retrotransposon	LINE	L2	L2	Daphne-38_HMa_invrep	4.90945	4.78749	5.11623	3.88096	4.18662	4.2716	4.72193	4.58156	4.64217	3.47462	4.14313	4.22106	4.23791	4.08368	4.17096	1.38629	0	0.916291	1.68857	1.26113	2.03688	2.13553	1.76766	1.96611	2.04307	2.63906	1.59987	4.9349	4.63715	5.18403
Retrotransposon	LINE	L2	L2	Daphne-7_CTe_invrep	6.03548	5.9707	5.70452	5.35304	5.17389	5.47646	5.77524	5.72866	5.53969	5.3959	5.69411	5.60825	5.3959	5.29079	5.09987	5.29205	5.287	5.39476	5.38856	5.30496	5.55005	5.58067	5.55683	5.62402	5.29402	5.0337	5.01728	5.22085	5.23547	5.26786
Retrotransposon	LINE	L2	L2	Daphne-7_HMM_invrep	5.61761	5.78528	5.21866	5.41758	5.35281	5.14342	4.16511	4.08797	4.10853	3.85015	4.72358	4.77551	3.1964	3.05804	3.60884	3.39606	3.52636	3.48124	3.43859	3.79808	3.82553	3.50941	3.77112	3.75654	3.09104	2.85811	3.05843	4.08845	4.45613	3.92964
Retrotransposon	LINE	L2	L2	Kiri-2_DPer_invrep	2.219203484	2.140066163	2.268683886	1.098612289	1.098612289	0	2.197224577	1.985914895	1.673975809	6.340359304	1.563976003	1.526056303	1.981001469	1.568615918	1.609437912	1.098612289	1.335001067	1.945910149	0	0	1.504077397	1.749199855	2.036882362	1.757857918	1.446918983	2.197224577	1.386294361	1.609437912	1.36330461	1.652922599
Retrotransposon	LINE	L2	L2	Kiri-35_AAe_invrep	1.819158984	1.504077397	1.504077397	1.478102963	1.410986974	1.299283893	1.349925976	1.098612289	1.76766143	1.098612289	1.964778166	1.491653877	2.762670953	2.728884975	2.557599335	1.427117156	1.815290432	1.686398954	1.349925976	1.098612289	1.504077397	1.676690871	1.913649615	1.609437912	1.725509262	1.36687706	1.871802177	6.996068308	7.297382291	7.185008156
Retrotransposon	LINE	L2	L2	Kiri-7_CQ_invrep	2.944438979	2.397895273	2.197224577	1.609437912	2.197224577	2.197224577	2.164964207	1.945910149	2.351375257	4.282601249	5.814130532	5.949339621	2.708050201	2.197224577	3.135494216	1.609437912	1.098612289	1.098612289	0	1.945910149	1.098612289	1.504077397	1.609437912	1.609437912	1.609437912	1.098612289	1.098612289	6.190315406	6.263398263	6.319868609
Retrotransposon	LINE	L2	L2	L2_Plat1e_mamrep	1.098612289	0	1.098612289	1.098612289	1.098612289	0	0	1.098612289	1.098612289	1.265665091	1.35812377	1.098612289	4.599598694	5.141663557	4.693968299	1.098612289	0	1.098612289	0	1.098612289	1.098612289	1.757857918	1.252762968	0	0	0	1.098612289	3.068052935	3.384390263	2.913903806
Retrotransposon	LINE	L2	L2	L2-1_GA_vrtrep	3.569532696	3.701301974	3.305053521	2.48490665	2.890371758	2.708050201	3.113515309	3.218875825	3.044522438	2.079441542	3.433987204	3.433987204	5.455321115	5.497168225	4.687266169	2.708050201	2.397895273	1.845826164	2.197224577	2.653241965	1.791759469	3.274446757	3.07577652	3.265759411	2.430415264	2.803360381	2.512302921	5.763936397	5.624017506	5.844992643
Retrotransposon	LINE	L2	L2	L2-10_Hmel_invrep	7.75026	7.461	7.42364	6.72883	6.69105	6.66611	5.90263	5.94098	5.43615	4.53358	6.1305	6.22687	4.40004	4.38882	4.40672	4.23966	4.25561	4.54152	4.89285	4.92241	4.99043	5.35973	5.47017	5.2933	4.35671	4.2022	4.16821	5.89546	5.67231	5.93798
Retrotransposon	LINE	L2	L2	L2-13a_Lch_vrtrep	1.449095436	1.690289524	2.186585965	1.568615918	1.098612289	1.64222838	1.897120485	1.670681637	1.635754571	5.132262782	2.854376061	3.758613051	2.530166781	2.738941449	2.94004513	3.314186005	1.810108426	2.257123184	2.653241965	2.564949357	2.564949357	2.833213344	2.386095934	2.80176517	2.25479408	1.691675748	2.024381953	3.125786377	2.63008866	3.580428055
Retrotransposon	LINE	L2	L2	L2-13b_Lch_vrtrep	2.460810318	2.31024766	2.501435952	1.563976003	1.446918983	1.791759469	2.1690537	2.014903021	2.397895273	5.66296048	3.218875825	3.353406718	3.465735903	2.748257607	3.440418095	1.098612289	1.909542505	1.791759469	1.815290432	1.845826164	1.550598322	2.674148649	2.54770929	2.590264665	1.609437912	1.446918983	1.098612289	1.977162385	2.397895273	1.609437912
Retrotransposon	LINE	L2	L2	L2-14_CTe_invrep	3.64342	3.57733	4.1449	2.33537	2.32728	2.43612	4.62715	4.68007	5.00469	1.74297	3.30505	3.81893	3.49651	3.75537	3.29584	0.693147	0.693147	0	2.40794	2.03688	2.85811	2.87795	2.74442	2.91777	1.79176	2.58022	2.68558	2.93689	2.99573	3.24951
Retrotransposon	LINE	L2	L2	L2-1a_Cis_invrep	3.77505715	3.763780505	4.664787242	2.926741188	2.658348622	2.887099744	3.869597643	3.51792208	3.80666249	4.109507357	3.815512105	5.399591544	3.439834591	3.945985689	4.767144467	4.017202505	3.378723389	3.066684557	3.172081867	3.4042228	2.864797507	2.804571768	2.814210397	2.8283013	2.912991763	2.908719078	2.862200881	2.969193207	3.36729583	3.778930374
Retrotransposon	LINE	L2	L2	L2-1b_Cis_invrep	5.39083	5.2274	5.19018	4.39973	4.33073	3.66356	4.36261	4.63149	4.40265	4.60231	3.99514	5.59471	4.07329	4.38203	5.05169	4.14991	3.91867	4.40672	4.84979	4.25561	4.31749	4.62823	4.05004	4.23411	4.97575	4.36097	4.30198	4.62252	4.7387	4.96284
Retrotransposon	LINE	L2	L2	L2-2_NVi_invrep	3.102342009	3.496507561	3.230239019	2.988561626	2.882401188	2.448536536	2.09714147	2.079441542	1.791759469	2.371578364	1.860752118	2.68881981	5.324959297	5.247502905	5.245269903	2.81626464	2.890371758	2.944438979	2.344549155	1.386294361	2.564949357	4.115546537	3.774400972	3.80666249	1.722766598	2.197224577	1.806797496	5.54322241	5.357529226	5.38907173
Retrotransposon	LINE	L2	L2	L2-21_ACar_vrtrep	3.772760938	3.218875825	2.988561626	2.564949357	2.014903021	2.564949357	2.197224577	2.63905733	2.564949357	1.609437912	2.079441542	1.985914895	4.779123493	4.406719247	4.86753445	3.540959324	3.496507561	3.113515309	1.435084525	0	1.504077397	3.157000421	2.799023718	2.995732274	1.945910149	1.098612289	1.609437912	5.424950017	4.779123493	4.892227063
Retrotransposon	LINE	L2	L2	L2-3_DRe_zebrep	0	0	0	1.098612289	0	0	0	0	1.098612289	1.098612289	0	0	1.098612289	0	1.098612289	1.098612289	0	1.098612289	0	0	1.098612289	1.098612289	1.098612289	1.098612289	0	0	0	7.347943823	7.156020619	7.337262382
Retrotransposon	LINE	L2	L2	L2-4_Hmel_invrep	5.37307	5.33196	5.06948	4.34812	4.34009	4.66908	3.4095	2.79902	2.11718	2.07944	1.719	3.00478	1.81011	2.17125	2.06263	1.96944	1.79176	2.06002	2.52573	3.07961	2.17125	0.693147	1.02962	1.69168	1.38629	2.42037	1.09861	2.86932	3.41922	3.3322
Retrotransposon	LINE	L2	L2	L2-8_NVi_invrep	7.1285	6.70751	6.64704	5.7513	5.7301	5.75504	6.16374	5.74556	6.20778	6.09482	6.94288	7.00488	5.27592	5.79149	5.79572	5.18319	5.48341	5.23378	5.95436	6.05712	5.88402	4.73839	5.50228	5.58564	3.43859	3.41068	3.63759	6.05496	6.16027	6.12152
Retrotransposon	LINE	L2	L2	L2B-4_AAe_invrep	2.63905733	2.261763098	2.268683886	2.512302921	2.302585093	1.686398954	2.197224577	1.791759469	1.791759469	1.609437912	2.48490665	2.197224577	6.66057515	6.639875834	5.978885765	2.86627258	2.944438979	3.218875825	1.098612289	0	2.708050201	2.48490665	2.662585501	2.586688269	2.564949357	2.564949357	2.564949357	5.424950017	5.332718793	5.533389489
Retrotransposon	LINE	L2	L2	L2B-4B_AAe_invrep	2.69463	3.22684	2.30259	3.2581	3.17805	3.3322	4.06044	4.12713	3.91202	2.48491	2.77259	2.63906	6.60665	6.6695	5.84644	4.52179	4.21951	4.2485	3.4012	3.09104	3.2581	4.47734	4.38203	4.06044	2.30259	0	0.693147	5.98846	6.16542	6.17794
Retrotransposon	LINE	L2	L2	LINE2H_CE_celrep	1.717651753	1.568615918	1.386294361	5.027164596	4.229957329	4.691347882	1.985914895	1.757857918	1.916922612	1.098612289	1.481604541	1.791759469	2.061422673	1.985914895	1.757857918	1.504077397	1.504077397	0	0	0	1.098612289	1.098612289	2.014903021	1.609437912	0	1.098612289	0	2.09714147	1.550598322	1.752538623
Retrotransposon	LINE	LINE1	LINE1	ATLINE1_10A_athrep	2.820056584	3.597312261	3.085979659	0	1.098612289	1.098612289	1.098612289	0	0	0	1.836211667	1.481604541	5.503586111	5.866468057	5.712788465	1.098612289	1.098612289	1.504077397	1.098612289	1.35812377	2.48490665	2.014903021	1.791759469	1.421386371	1.386294361	1.704748092	1.533929576	4.257030144	4.243722442	4.048051029
Transposon	Helitron	Helitron	Helitron	ATREP18_athrep	6.26101	5.9287	5.91677	5.86302	5.9224	5.83414	5.59831	5.56263	5.54961	2.84858	3.36527	2.89499	3.60614	3.46845	3.4981	4.25482	4.00638	3.85573	5.19992	5.10986	5.21843	3.6861	3.98243	3.48975	4.56742	4.59714	4.44748	4.95583	4.86959	4.81776
Transposon	Helitron	Helitron	Helitron	DHH_Helitron-4N1_SMo_PIER	6.37715	6.2393	6.29711	5.22977	5.20675	5.0527	5.40941	5.36077	5.48997	3.11668	4.3631	4.93806	4.47164	4.51907	4.60267	0	0	0	1.7492	0	0	2.21297	2.48491	1.60944	3.31159	3.15396	3.09104	5.56452	5.5033	5.27197
Transposon	Helitron	Helitron	Helitron	DHH_Helitron-N1_SBi_PIER	5.29029	5.20218	5.47367	5.8499	5.94856	5.99146	3.14415	3.09104	3.52636	2.90872	3.2581	3.07269	4.6747	4.39692	4.59714	4.18965	4.27667	4.24276	2.77259	2.30259	2.63906	4.95301	4.85826	4.97811	2.30259	2.26176	2.45101	4.1325	3.93574	4.36182
Transposon	Helitron	Helitron	Helitron	DHH_HELITRON7_OS_PIER	8.11471	8.13684	7.82887	6.17379	6.2176	6.16395	6.09009	6.37995	6.18601	3.41115	4.88191	5.3033	4.36945	4.17246	4.70411	1.34373	1.67398	1.16315	2.30259	2.19722	2.97326	2.79902	3.08344	2.59613	2.94444	3.25037	3.79829	6.54276	6.49512	6.59946
Transposon	Helitron	Helitron	Helitron	DHH_HELMET3_PIER	6.28077	6.20939	6.18826	5.1985	5.30703	5.09579	5.02651	5.27684	5.37528	3.17805	4.76826	5.26671	5.10443	4.75359	4.92403	0.693147	1.28093	0	2.14843	0.693147	1.38629	2.56495	2.85811	2.35815	3.29584	3.51792	2.60269	5.41343	5.34711	5.26598
Transposon	Helitron	Helitron	Helitron	Helitron-1_AN_fungi	1.76578	1.7346	2.07944	1.28093	0	0.693147	2.12026	1.28093	0.693147	0	0.693147	0.693147	4.78749	4.72147	5.0626	0.693147	0	1.89712	2.19722	1.28093	2.73003	1.38629	2.48491	1.79176	0	1.79176	0	2.07944	1.28093	2.63906
Transposon	Helitron	Helitron	Helitron	Helitron-1_DR_zebrep	5.29734	5.4523	5.05829	4.1795	4.3843	4.45607	5.50449	5.48008	5.36484	3.27083	4.40206	4.3535	4.19613	4.17173	4.38098	0.961409	1.56862	1.47331	2.08901	2.45788	2.36085	2.39356	2.9139	2.30259	3.32844	2.96364	3.16924	5.61866	5.49218	5.35573
Transposon	Helitron	Helitron	Helitron	Helitron-1_Mad_edcotrep	2.48491	2.41591	0.693147	0	0.693147	0	1.94591	1.38629	0	3.78419	5.12634	4.7185	2.02815	2.61007	2.41591	2.37955	1.97408	1.97408	1.97408	2.2192	2.82138	3.14415	3.36038	3.47816	1.29928	0.693147	1.06784	1.38629	1.72277	2.02815
Transposon	Helitron	Helitron	Helitron	Helitron-2_CRe_chlrep	3.636440767	3.641011864	3.758748275	4.95033312	5.05182842	4.886190116	2.480513681	2.772588722	2.515144833	3.015108339	3.293188919	3.45946629	3.080160734	2.981633349	3.12202566	3.183472456	2.712340983	2.810546619	2.353278207	2.670002133	2.667228207	3.325036021	3.282871699	2.967559111	2.617395833	2.856470206	2.666623857	3.035409613	2.814947535	2.833213344
Transposon	Helitron	Helitron	Helitron	Helitron-2_DR_zebrep	5.00408	5.05667	5.03938	5.01046	4.99102	4.96571	4.0516	4.25371	4.25243	3.47481	3.89904	4.42418	3.38777	3.49094	3.78689	3.94266	3.83316	3.63419	3.16071	3.32613	3.12707	3.71394	3.64541	4.05819	3.36206	3.17805	3.39885	4.77938	4.58241	4.49953
Transposon	Helitron	Helitron	Helitron	Helitron-2_HM_invrep	5.1503	5.14135	5.17156	4.12613	4.43971	4.69953	4.05798	4.25715	4.20891	2.71543	3.74047	4.29046	3.11629	3.47321	3.53027	1.81615	1.99243	2.37279	2.54126	2.8845	1.73827	2.0149	2.3979	2.37279	2.62916	2.3896	2.93609	4.47607	4.62129	4.67924
Transposon	Helitron	Helitron	Helitron	Helitron-4_ALy_edcotrep	4.874349636	5.081820427	5.17887483	2.268683886	2.606799746	2.197224577	2.57671069	2.497641878	2.701361213	4.986875247	4.687671407	5.226821365	2.934202555	3.708682081	3.835014523	3.885972621	4.108137336	4.339467455	2.843850684	3.496507561	3.374928694	4.288936364	4.505349851	3.837458929	3.465735903	2.953549979	3.530554658	3.610917913	3.586040756	2.756001919
Transposon	Helitron	Helitron	Helitron	Helitron-4_DR_zebrep	7.03383	6.68643	6.90911	5.30024	5.10245	5.4339	5.3845	5.14669	4.89899	3.38014	4.31691	4.62624	3.73943	3.93834	3.92316	2.11453	1.54756	1.81529	2.97041	2.42354	2.46622	2.28335	2.19722	2.29422	3.15274	2.76166	3.05843	5.32821	5.40334	5.39396
Transposon	Helitron	Helitron	Helitron	Helitron-4N1_SMo_plnrep	5.2391	5.11048	5.01064	4.39753	4.18586	4.32192	4.70502	4.6096	4.7471	2.89037	3.77276	4.44265	4.22318	4.26619	4.42056	0	0	0	1.09861	1.28093	1.38629	1.88273	2.42775	1.28093	3.05636	2.85263	2.91777	4.68444	4.46303	4.37952
Transposon	Helitron	Helitron	Helitron	Helitron-7_CGi_invrep	8.45589	8.34066	7.97854	4.47278	4.53475	2.37955	4.81705	4.93303	3.42751	2.92998	3.81991	4.39692	2.95869	2.46385	3.46004	4.05468	3.1856	2.85037	3.00478	3.55794	3.39089	2.93964	2.65196	2.45414	5.60703	5.57342	5.62474	3.50656	4.13783	3.30589
Transposon	Helitron	Helitron	Helitron	Helitron-9_CGi_invrep	4.93138	5.11371	4.98361	3.71008	3.67207	3.46574	3.75342	3.68888	3.66356	2.63906	3.58352	3.12926	8.30406	8.25251	8.22016	4.91476	4.77792	4.95112	3.68888	3.62244	3.56105	4.81102	4.68478	4.63889	0.693147	1.64866	0	7.33563	7.52217	7.49077
Transposon	Helitron	Helitron	Helitron	Helitron-N1_HSal_invrep	4.13631	4.06309	3.55083	3.13549	3.42318	3.3322	4.90055	5.66395	5.15412	4.03719	5.67773	5.65699	3.75158	4.44433	4.32319	3.29584	3.3474	3.80983	4.52489	4.00125	4.04305	4.83174	4.82946	4.1795	2.59026	2.77259	3.41068	3.96008	4.01708	3.73205
Transposon	Helitron	Helitron	Helitron	Helitron-N1_PBa_invrep	6.43474	6.35402	6.21419	5.64326	5.53042	5.73979	5.47081	5.4008	5.33123	3.91202	5.02388	5.29915	4.17072	4.103	4.31558	4.65396	5.10897	5.38581	2.74084	3.6064	3.59927	4.60869	4.52058	4.5393	2.94193	3.12861	3.27017	5.50296	5.60132	5.50262
Transposon	Helitron	Helitron	Helitron	Helitron-N1_PTr_dcotrep	5.22872	4.8822	4.82296	3.79997	3.71531	3.64694	3.82158	3.87315	3.66314	4.65844	5.3211	4.81373	4.61402	4.61782	4.41026	4.51325	3.6683	3.773	4.03306	4.63504	4.24194	4.31329	4.02749	4.72295	4.26356	3.9568	4.15374	3.82319	3.77768	3.55978
Transposon	Helitron	Helitron	Helitron	Helitron-N1_SBi_grasrep	5.19518	5.09252	5.37898	5.21494	5.26165	5.1023	4.37701	4.12713	4.15261	2.97893	3.63759	3.77506	3.44042	2.7213	3.44042	3.12676	3.2884	3.37417	4.35157	4.59714	4.26549	4.8331	4.91265	4.78415	0.693147	1.38629	2.26176	3.21888	3.21084	4.00369
Transposon	Helitron	Helitron	Helitron	Helitron-N2_DR_zebrep	6.34468	6.42552	6.64801	4.14789	4.28797	4.3	3.39207	3.47816	3.78986	2.37491	2.9472	3.06546	3.45789	3.23212	3.4159	2.41591	2.19722	1.94591	2.25878	1.5329	2.15176	2.17475	2.46622	2.59339	1.55335	1.93634	1.31219	3.89752	4.02177	4.32744
Transposon	Helitron	Helitron	Helitron	Helitron-N21_CGi_invrep	4.78471	4.02535	4.44265	4.44768	4.15497	4.2485	4.7585	4.72105	4.76003	5.22036	5.57025	4.86533	4.68356	4.8305	5.0876	4.39445	4.64759	4.23772	4.52721	4.72358	4.70275	5.13971	4.9914	4.92966	4.14991	4.44265	4.28588	4.54329	4.60803	4.59078
Transposon	Helitron	Helitron	Helitron	Helitron-N3_DR_zebrep	4.79061	5.04094	4.7831	3.7612	3.54674	4.0279	4.0221	3.32324	4.09737	5.18178	5.38541	4.75837	3.86223	3.93183	3.89763	4.46591	4.00733	3.79773	4.06536	3.45677	3.25259	4.83628	4.82259	4.93926	3.82864	3.40674	3.96217	3.81771	3.77717	3.54873
Transposon	Helitron	Helitron	Helitron	Helitron-N34_CGi_invrep	5.63479	5.52943	5.61949	4.28703	4.3108	4.70048	5.27665	5.27957	5.11026	4.88028	5.88213	6.00071	5.09638	5.08936	5.51745	5.21649	5.22575	5.17332	5.04802	4.9396	5.16479	5.31321	5.48539	5.22843	4.82831	4.75605	4.84756	5.22267	5.08936	5.06575
Transposon	Helitron	Helitron	Helitron	Helitron-N35_CGi_invrep	5.63275	5.98457	5.86426	3.91646	4.60517	4.06998	5.54224	5.30703	5.27172	4.91632	5.68782	5.58537	4.97135	5.0689	5.18739	4.44265	4.62986	4.40672	4.91265	4.4006	4.56174	5.12694	4.96808	4.87137	5.05716	4.76431	4.66814	5.19552	5.42385	5.46065
Transposon	Helitron	Helitron	Helitron	HELITRON7_OS_oryrep	5.72424	5.69944	5.38045	4.00733	3.84588	3.65325	3.22137	4.01458	3.98155	1.50408	2.02438	2.94444	2.35928	1.60252	2.71852	0.693147	0	0.693147	0.693147	0	1.72277	1.09861	1.38629	0.757684	1.09861	1.67398	1.32176	4.01998	3.96398	3.70475
Transposon	Helitron	Helitron	Helitron	HELMET3_dcotrep	5.14361	4.95723	5.01064	4.26268	4.46591	4.5136	4.51961	4.77702	4.74782	3.41225	4.16777	5.08914	4.64714	4.1795	4.19637	0	0.693147	0	1.54045	1.54045	2.30259	2.11453	2.33075	1.84583	2.00533	2.79321	2.04769	4.47278	4.44969	4.30407
Transposon	Helitron	Helitron	Helitron	PtDHX_14_B_PIER	2.15687	2.03087	2.23589	2.49091	2.78638	3.04452	4.82508	4.82424	4.83074	5.05077	5.06972	5.03782	3.60896	3.61603	3.49305	3.61846	3.57046	3.60755	4.34095	4.39966	4.33828	4.04273	3.97389	4.01232	4.38656	4.3843	3.71229	3.26702	3.2751	3.24147
Transposon	Helitron	Helitron	Helitron	PtDHX_14_C_PIER	2.81704	2.3979	3.23868	2.85071	3.11149	3.39163	4.84701	4.87251	4.808	5.26282	5.3561	5.24324	3.3322	3.50694	3.25373	3.57863	3.50217	3.54119	4.27095	4.17399	4.2133	4.03912	4.01524	3.98133	0	0.693147	0	3.3468	3.45278	3.26214
Transposon	Helitron	Helitron	Helitron	PtDHX_19_PIER	2.634281659	3.017293158	2.723798871	1.584120104	1.681758574	1.421386371	3.141337977	3.172081867	3.099903082	2.620798795	2.975840742	2.901322688	2.693126055	2.747924547	2.789488857	2.708050201	2.848044001	2.832165737	2.768072288	3.050442972	2.944181051	2.711484298	2.781040406	2.389362609	5.239098007	5.949774989	5.27190152	2.590264665	2.713163771	2.862200881
Transposon	Helitron	Helitron	Helitron	PtDHX_21_PIER	2.81626	3.49987	3.45877	2.90872	3.00048	3.06267	5.10958	5.18253	5.12184	3.85419	3.95124	4.23234	4.26603	4.41941	4.11027	5.3905	5.35172	5.39816	3.14224	3.2992	3.10862	5.52566	5.55554	5.63668	3.85318	3.24519	3.45527	5.75715	5.63411	5.59913
Transposon	Helitron	Helitron	Helitron	PtDHX_22_PIER	1.739702726	2.129630727	2.117181592	1.098612289	1.128465546	1.098612289	5.09800494	4.813459964	4.971443914	4.922124612	4.737399481	4.616278262	3.866498304	3.848612381	3.86223174	2.513866567	2.512302921	2.600064019	4.376865841	4.599940535	4.136190033	2.812968619	2.326877626	2.723667612	1.558144618	1.829499921	1.299283893	6.391588751	6.298347963	6.282857227
Transposon	Helitron	Helitron	Helitron	PtDHX_31_PIER	3.99426	3.63004	3.75787	1.82161	2.49994	1.33977	5.24702	5.25668	5.30035	3.50465	3.895	3.7612	3.34297	3.17162	3.38603	5.42704	5.5187	5.42245	3.55249	3.47255	3.36346	5.03448	5.0628	5.20401	0	0.826677	0	5.98233	5.5079	5.69709
Transposon	Helitron	Helitron	Helitron	PtDHX_39_PIER	2.71852	2.90417	2.93293	2.92091	3.18114	2.55852	3.82109	3.94109	3.85128	3.82139	4.01591	3.98096	2.61702	2.99573	2.63296	2.35974	2.34032	2.5887	3.70478	3.74838	3.73828	2.34492	2.12987	2.32008	6.06727	5.99583	5.58403	2.38774	2.34728	2.53568
Transposon	Helitron	Helitron	Helitron	PtDHX_4_PIER	2.90935	2.80087	2.87747	3.55416	3.69341	3.19287	4.81777	4.79758	4.86464	5.04151	5.05511	5.06142	3.48724	3.46262	3.36086	3.42307	3.40922	3.40387	4.26984	4.34459	4.31268	3.81017	3.76418	3.81404	4.19229	4.68213	4.18136	3.51797	3.397	3.53576
Transposon	Helitron	Helitron	Helitron	PtDHX_45_B_PIER	4.4803	4.32959	4.81015	4.0482	3.94922	4.30821	4.79181	4.84662	4.78063	2.94309	3.13738	3.5527	3.54207	3.58352	3.65578	5.27746	5.39816	5.41502	3.22509	3.21105	3.22129	5.22799	5.23078	5.31167	3.21888	3.2884	2.57588	3.71763	4.22218	3.55191
Transposon	Helitron	Helitron	Helitron	PtDHX_45_PIER	3.22559	3.28993	3.46254	2.47491	2.23978	2.21736	5.15554	5.16077	5.21836	3.60838	3.8537	3.81153	2.71487	2.81848	2.77259	5.94317	5.91344	5.89198	3.45826	3.45274	3.49344	5.65887	5.65832	5.67726	0	0.693147	0	3.76398	3.72525	3.67207
Transposon	Helitron	Helitron	Helitron	PtDHX_46_PIER	2.57515	2.5288	2.40566	1.652	1.39813	1.38629	3.9687	3.93037	4.0021	4.09298	4.03255	4.11524	4.08237	4.29671	4.12584	4.87383	5.09882	4.70903	3.85177	3.95481	3.8816	5.29163	5.27377	5.48541	2.29422	2.1454	1.9981	4.62245	4.48471	4.72643
Transposon	Helitron	Helitron	Helitron	PtDHX_5_B_PIER	2.3979	2.41245	2.56307	2.44441	2.95522	2.82822	3.71164	3.75304	3.74997	3.3005	3.4587	3.43857	3.57614	3.30264	3.47637	1.50408	1.23788	0.693147	3.62567	3.67386	3.64428	0.693147	1.09861	1.70788	4.98946	5.20034	5.09171	2.0987	2.17555	2.11073
Transposon	Helitron	Helitron	Helitron	PtDHX_5_PIER	2.98413	2.83896	3.13026	2.97866	2.99088	3.12191	4.1323	4.13232	4.12768	3.71684	3.94872	3.91938	3.92266	3.90929	3.73544	1.7755	1.53033	1.78533	3.86584	3.92383	3.89906	1.70138	1.63083	2.07944	5.85708	5.98757	5.97366	2.57632	2.62961	2.5423
Transposon	Helitron	Helitron	Helitron	PtDHX_8_PIER	5.42746	5.36898	5.29509	4.3239	4.1911	4.08425	4.89719	4.83955	4.85197	4.70197	4.83696	4.96373	3.9431	3.93169	3.81503	3.53869	3.46446	3.40404	4.09671	4.00363	4.09038	3.55866	3.62292	3.71669	3.05566	2.70614	3.11863	4.29552	4.30502	4.33397
Transposon	TIR	hAT	hAT	ATHAT1_athrep	3.64631897	3.270834298	2.881067496	2.530166781	3.280911216	2.63905733	1.280933845	1.609437912	1.098612289	1.098612289	1.098612289	1.272966076	7.543315719	7.545268178	7.477683426	1.32175584	2.146581364	1.421386371	1.791759469	0	1.098612289	1.824549292	1.704748092	2.1768155	1.860752118	1.717651753	1.757857918	3.033885109	3.344037791	2.751537441
Transposon	TIR	hAT	hAT-Charlie	Charlie12_humrep	0	1.098612289	1.098612289	0	0	0	1.098612289	1.098612289	0	1.098612289	0	1.15745336	0	0	1.098612289	1.098612289	1.098612289	0	0	0	0	1.098612289	0	0	0	1.609437912	0	4.415392501	4.634728988	5.043425117
Transposon	TIR	hAT	hAT	DTA_hAT-20_ZM_PIER	2.197224577	1.098612289	1.098612289	1.098612289	1.098612289	1.098612289	1.098612289	0	0	1.098612289	1.098612289	1.609437912	6.01615716	5.300814247	4.735733428	0	0	0	0	0	1.609437912	0	1.098612289	1.098612289	1.098612289	0	0	1.098612289	0	1.609437912
Transposon	TIR	hAT	hAT	DTA_hAT-4_PTr_PIER	4.78511	5.39703	5.41165	4.4175	4.47734	4.483	5.17615	5.09528	5.07985	3.71705	4.56954	4.97443	4.84222	4.82028	4.85787	1.60944	0	0	0	2.02815	1.79176	2.42037	2.65926	2.37955	2.95751	3.35864	3.3322	5.02059	4.88658	4.89597
Transposon	TIR	hAT	hAT	DTA_hAT-5_PTr_PIER	2.5965	2.64553	2.3298	1.8506	2.1848	2.58732	1.18958	0.693147	1.38629	2.8596	2.67728	2.8596	6.47763	6.43409	6.51387	3.41538	3.28149	3.30435	1.01857	0.693147	1.38629	2.55529	2.59739	2.17475	1.38629	0.693147	1.96611	5.2454	5.38802	4.86104
Transposon	TIR	hAT	hAT-Tag1	DTA_VIHAT3_PIER	4.67041	4.66902	4.48488	5.22992	6.38215	5.49031	2.77259	2.46964	2.59026	1.56862	1.69645	2.7496	2.60269	2.69968	2.93119	2.59931	2.45414	2.48491	1.51413	0.693147	1.72277	4.1325	3.97968	4.14313	1.82455	1.70907	1.93284	2.92162	2.04554	2.72332
Transposon	TIR	hAT	hAT-Tip100	hAT-1_LMi_invrep	3.756538103	3.810694351	3.79829424	2.251291799	1.609437912	2.172223528	2.233591864	2.02659968	2.879198457	5.004617222	3.374168709	4.547843993	2.772588722	3.326233146	3.633818545	3.135494216	3.169685581	2.890371758	1.871802177	2.256064601	2.68881981	2.125251078	2.676800303	2.917770732	1.871802177	1.967650673	2.564949357	2.602689685	2.409940617	2.274933281
Transposon	TIR	hAT	hAT	hAT-1_LSa_edcotrep	3.016113165	2.902086208	3.14361334	1.626680403	1.609437912	1.757857918	1.57646834	1.92730529	2.1102132	1.978345531	2.268683886	2.649212731	5.813652806	5.418320159	5.680643488	2.36427832	3.001271901	3.157000421	1.797913826	1.670681637	1.504077397	2.408529438	2.233591864	1.945910149	2.386466577	2.740840024	1.592631472	4.307563022	4.415944853	4.554878495
Transposon	TIR	hAT	hAT	hAT-1_SBi_grasrep	1.79176	1.38629	2.15948	3.01226	2.74442	3.27714	4.25883	4.21724	4.96051	2.36713	3.16407	3.01375	5.07204	4.94343	4.95406	5.56961	5.52146	5.63002	4.58682	4.39333	5.32788	5.22881	5.36442	4.65713	0	0	0	5.15136	5.3845	5.31485
Transposon	TIR	hAT	hAT	hAT-1_SP_spurep	5.65687	5.491	5.5693	3.94481	4.34381	3.79066	4.93986	4.94164	4.70824	4.94876	4.61086	6.21511	4.69908	5.61521	5.97126	4.0151	3.96651	4.06536	4.79991	5.04181	4.77068	5.35067	4.93447	5.4306	4.59764	4.62986	4.53528	4.43346	4.08036	4.18965
Transposon	TIR	hAT	hAT-Tip100	hAT-1002a_Croc_vrtrep	2.197224577	2.079441542	1.791759469	1.791759469	3.198673118	3.314186005	1.098612289	1.504077397	2.32238772	5.220355825	2.590264665	3.688879454	2.240709689	2.734367509	2.624668592	2.151762203	2.533696814	1.098612289	1.504077397	1.526056303	0	3.265759411	2.833213344	2.734367509	2.734367509	3.349904087	2.624668592	2.282382386	2.397895273	1.435084525
Transposon	TIR	hAT	hAT-Tag1	hAT-12_FV_edcotrep	0.693147	0	1.12847	0.693147	0	1.02962	4.85809	5.11477	5.92502	0	0.693147	0.693147	1.38629	0	0.693147	1.16315	1.31219	1.79176	4.60517	4.76583	5.46019	0.693147	0.693147	0	0	0	0	0	2.23359	0.693147
Transposon	TIR	hAT	hAT-Tag1	hAT-12_VVi_edcotrep	2.681692536	3.11033693	2.735036117	2.368372834	2.48490665	2.047692843	2.219203484	2.472926844	2.054123734	1.349925976	2.251291799	2.803360381	4.799560291	5.010848605	5.075405038	2.341805806	2.45673863	1.679642849	1.791759469	1.977162385	1.639744008	1.824549292	2.157219379	2.151762203	1.894174652	1.959424137	2.16714674	3.511545439	2.597386761	2.868393098
Transposon	TIR	hAT	hAT-Tip100	hAT-13_DR_zebrep	5.29187	5.15906	5.14833	4.94775	4.92622	4.9787	4.65668	4.85981	4.86423	2.77259	3.64134	3.72052	5.22409	5.33341	5.17453	4.52489	4.45766	4.64439	4.05468	4.24372	3.51155	4.08403	4.13859	4.04054	2.15948	1.94591	2.3979	4.43591	4.27667	4.08718
Transposon	TIR	hAT	hAT	hAT-15N1_LCh_vrtrep	2.602689685	2.351375257	2.917770732	1.609437912	1.098612289	0	0	1.609437912	1.098612289	5.303304908	0	1.945910149	1.386294361	1.098612289	1.609437912	0	0	0	1.098612289	0	0	1.609437912	1.945910149	2.197224577	1.098612289	1.609437912	2.197224577	1.098612289	0	1.098612289
Transposon	TIR	hAT	hAT	hAT-17_Croc_vrtrep	5.491158399	5.13890537	5.169853114	4.471198697	4.707889216	4.479606963	3.862832761	3.536115729	4.129436572	2.922026528	4.369447852	4.416159909	3.538887614	2.965273066	2.63905733	2.545531272	2.344549155	2.961828998	3.058035486	3.001271901	3.69717743	3.012259936	3.481240089	3.063390922	2.63905733	2.54099551	2.34703729	3.301991959	3.187624551	3.022301174
Transposon	TIR	hAT	hAT	HAT-17_Mad_edcotrep	2.302585093	2.11554683	2.512302921	1.904238091	1.550598322	2.251291799	1.540445755	1.098612289	1.819158984	1.550598322	1.704748092	1.493926046	3.946795378	4.957586073	4.415392501	2.21557408	2.061422673	2.518647633	1.386294361	1.241713577	1.098612289	3.465735903	3.307465289	3.776585798	1.871802177	2.164964207	1.452252967	5.011588173	5.676753802	4.650487661
Transposon	TIR	hAT	hAT-Charlie	hAT-1960_Ami_vrtrep	4.05352	4.41884	4.49536	4.75359	4.11533	5.0876	3.76584	3.66868	3.31782	3.71357	4.53045	4.38701	2.93386	3.24259	3.19458	4.04655	4.10759	3.29298	3.47816	3.10906	2.50844	3.89522	4.45435	3.72897	2.89037	2.58022	2.12026	3.57422	4.11415	3.80221
Transposon	TIR	hAT	hAT-Charlie	hAT-1N1_AC_vrtrep	5.2789	5.11714	5.09638	4.36036	4.39445	4.18096	4.05512	3.93574	3.78743	3.73084	4.46591	4.53974	4.00278	3.68116	4.29631	1.20397	1.38629	0.693147	2.96183	2.28238	2.63906	2.8679	3.21084	2.38774	2.75457	2.20573	2.74727	4.28703	4.18532	4.4376
Transposon	TIR	hAT	hAT-Charlie	hAT-2_DR_zebrep	5.22744	5.27111	5.28667	4.77529	4.53796	4.68368	4.35813	4.36097	3.71579	3.97968	4.76927	5.04401	3.53867	3.77883	4.11236	4.17131	4.29501	3.87467	3.8986	3.8111	3.55275	3.55535	3.24843	3.72328	2.07944	2.2192	2.49994	4.94994	4.95326	4.93382
Transposon	TIR	hAT	hAT-Tag1	hAT-2_HM_invrep	4.5772	4.8729	5.52882	3.28725	2.87861	3.3474	3.40453	3.0239	3.19545	3.00743	3.69272	3.54873	8.24532	8.27538	8.28211	4.66881	4.64576	4.52023	3.24779	3.60187	3.17108	4.80654	4.71466	4.6584	0.693147	0.693147	1.38629	7.13537	7.24065	7.14006
Transposon	TIR	hAT	hAT-Tip100	HAT-2_Mad_edcotrep	1.098612289	1.32175584	1.386294361	1.504077397	1.349925976	1.098612289	1.098612289	1.098612289	0	5.775367982	1.299283893	1.609437912	1.098612289	1.299283893	1.478102963	0	1.098612289	0	0	0	0	1.098612289	1.533929576	1.098612289	1.098612289	1.272966076	1.098612289	1.098612289	1.455286233	1.945910149
Transposon	TIR	hAT	hAT-Charlie	hAT-2_MM_prirep	4.817592469	5.521460918	5.648269765	1.609437912	0	0	0	1.098612289	1.098612289	2.512302921	1.32175584	1.098612289	1.098612289	1.609437912	1.945910149	0	0	0	0	0	0	0	0	1.791759469	1.098612289	1.098612289	0	0	1.504077397	1.945910149
Transposon	TIR	hAT	hAT-Tip100	hAT-20_SM_invrep	2.251291799	2.371578364	2.602689685	2.708050201	2.448536536	1.985914895	2.079441542	3.295836866	2.944438979	2.128231706	3.241474539	3.183990341	3.688879454	4.257030144	3.549617387	4.677490848	3.540959324	4.442651256	0	1.386294361	0	5.413875707	4.564348191	4.3223244	2.224623552	2.448536536	1.734601644	3.784189634	3.937411961	4.25561271
Transposon	TIR	hAT	hAT-Ac	hAT-20_ZM_grasrep	1.550598322	1.504077397	1.098612289	1.098612289	1.098612289	1.098612289	0	0	0	0	1.349925976	1.098612289	6.062388885	5.109170571	5.126253024	0	0	0	0	1.098612289	0	0	1.609437912	1.609437912	1.349925976	0	1.098612289	1.098612289	1.386294361	1.098612289
Transposon	TIR	hAT	hAT-Charlie	hAT-21_CPB_bellii	5.91582	5.86119	6.02506	4.22788	4.50614	4.4128	4.86239	4.73327	4.76217	5.33754	5.97041	5.95324	6.55583	6.34413	6.66992	4.64164	4.53413	4.58205	4.60517	4.79026	4.79026	5.33994	5.45654	5.58725	1.67398	1.79176	2.17475	4.96584	4.89784	4.9675
Transposon	TIR	hAT	hAT-Tip100	hAT-21N2_LMi_invrep	4.91265	4.97903	4.71594	4.84156	5.06681	5.11199	1.29928	2.36713	1.67398	1.64866	3.07578	3.02852	2.99573	3.42318	3.35574	3.7297	3.28342	3.3322	2.90872	1.79176	1.67398	3.87714	3.56483	3.64632	2.96183	2.33537	2.61496	3.52636	3.73767	3.27083
Transposon	TIR	hAT	hAT-Charlie	hAT-25_DR_zebrep	4.96808	5.37021	5.38699	4.11415	3.61568	3.52981	4.15261	4.27975	3.65785	2.44235	3.7495	3.44718	3.37112	3.04452	3.18842	0	1.28093	0.693147	2.03688	0.693147	1.99243	1.79176	1.90954	1.16315	2.44235	2.66723	1.84583	4.06427	4.03424	3.85015
Transposon	TIR	hAT	hAT-Ac	hAT-27_HM_invrep	4.93447	4.95984	5.04392	4.35955	3.50656	4.10264	4.78621	4.71575	4.37226	3.29053	3.60414	4.7459	3.64565	4.20682	3.87714	0.693147	0.693147	0	0.693147	1.33977	0.693147	0	1.20397	0.693147	2.25533	1.99243	2.66259	4.74888	4.63149	4.9464
Transposon	TIR	hAT	hAT-Charlie	hAT-2n1_DR_zebrep	5.8512	5.76451	5.84381	5.69933	5.70156	5.72929	4.78272	4.99914	4.37005	5.15474	5.65149	5.72499	3.44316	3.39376	3.6064	5.51164	5.47693	5.5641	5.00227	4.85029	4.90379	5.22336	5.28602	5.20279	2.05127	2.99573	2.53492	5.59694	5.51242	5.28923
Transposon	TIR	hAT	hAT-Tip100	hAT-30N1_DR_zebrep	4.487387275	4.553876892	4.610450222	3.680512045	3.42751469	3.384390263	4.255239591	4.51223219	3.742946149	5.021344413	5.05751888	5.231739434	4.823301195	4.702079087	4.787491743	4.270695553	3.761200116	3.945734339	3.278596509	3.186352633	3.146305132	4.232293267	4.077537444	4.134276561	3.032546247	3.312785024	3.208150514	3.996581042	4.45931864	4.143134726
Transposon	TIR	hAT	hAT-Tag1	hAT-32_HM_invrep	5.19988	5.3822	4.94751	4.14458	4.2312	4.35204	4.62382	4.71133	5.02826	2.53898	3.98155	4.11087	3.86073	3.96513	3.41955	0	0	1.23214	0.693147	2.19722	1.38629	1.38629	1.47331	1.28093	2.3979	2.3896	1.41528	5.03435	4.69717	4.77376
Transposon	TIR	hAT	hAT-hAT5	hAT-33_HM_invrep	4.65966	5.19172	5.34353	3.71705	3.75118	4.07754	5.20675	5.12247	4.51743	2.62104	3.88671	4.66579	3.4114	4.17439	3.93183	0.693147	0	1.79176	0.693147	0	1.64223	2.0149	1.60944	2.26868	2.95751	2.71753	2.69848	4.84419	4.76856	4.59259
Transposon	TIR	hAT	hAT	hAT-35N1_LCh_vrtrep	3.384390263	3.157000421	2.197224577	1.098612289	0	1.887069649	1.609437912	1.945910149	2.397895273	6.048947769	2.197224577	2.890371758	2.602689685	2.48490665	2.740840024	2.197224577	1.609437912	1.504077397	1.504077397	1.098612289	0	1.887069649	2.833213344	2.448536536	2.397895273	2.397895273	2.302585093	2.120263136	1.717651753	1.717651753
Transposon	TIR	hAT	hAT-Ac	hAT-4_ALy_edcotrep	1.098612289	1.098612289	1.098612289	1.098612289	0	1.098612289	1.098612289	0	0	1.098612289	0	1.098612289	1.098612289	1.098612289	1.098612289	0	1.098612289	1.098612289	0	0	0	1.098612289	1.098612289	1.098612289	1.335001067	1.098612289	1.098612289	5.111987788	4.903154013	5.101894857
Transposon	TIR	hAT	hAT-Tag1	HAT-4_Mad_edcotrep	0.693147	1.38629	1.06784	2.26622	2.4463	2.26718	5.00171	5.04772	4.36945	4.33073	4.04888	4.80402	2.93119	3.31782	2.71249	2.07944	2.75154	1.38629	4.88063	4.84531	4.30181	2.19722	2.42238	2.96808	0.693147	1.38629	0.693147	2.75777	3.10234	2.951
Transposon	TIR	hAT	hAT	hAT-4_PBa_invrep	5.18982	5.13756	4.96869	5.45803	5.84383	5.93897	3.34463	3.37074	3.25925	4.15586	4.32076	4.85242	2.6771	3.09104	2.74377	4.63779	5.00636	4.74134	3.71949	3.51965	3.4152	4.76056	4.97582	4.46695	3.41408	3.66071	3.74557	4.85703	4.85845	4.77582
Transposon	TIR	hAT	hAT-Tip100	hAT-4_PTr_dcotrep	4.30599	5.03695	4.90281	3.97239	4.2687	4.06903	5.10595	5.115	5.14604	3.51792	4.2485	4.99721	4.67049	4.97772	4.72073	2.07944	0	0.693147	1.20397	2.17475	1.79176	2.22462	2.07944	2.02815	2.48491	3.32195	2.75684	4.66814	4.47449	4.65634
Transposon	TIR	hAT	hAT-Tip100	hAT-42_HM_invrep	5.73269	5.68358	5.7214	5.27925	5.38348	5.43711	3.71844	3.68331	3.53806	4.00531	4.45667	4.54523	2.71543	2.70062	3.03922	4.23411	3.93834	4.19828	3.24086	3.29584	3.39283	4.06427	4.49486	4.59512	3.6763	3.45877	3.0498	4.82565	4.65586	4.57265
Transposon	TIR	hAT	hAT	hAT-42_Lch_vrtrep	5.88402	5.84567	5.87493	5.88992	6.08192	6.07436	4.51844	4.46262	4.39268	4.19828	4.93036	5.05412	4.13402	4.40296	4.21042	5.28151	4.20718	4.54152	3.58778	3.44468	3.65498	4.99617	4.74989	4.66479	3.66946	3.36994	3.27569	5.21242	4.93182	4.98654
Transposon	TIR	hAT	hAT-Tip100	hAT-47_HM_invrep	7.15139	6.99899	7.01423	3.70637	4.45298	3.91906	4.37518	4.63416	4.78847	2.94444	3.57555	3.98434	3.71135	4.00993	4.2485	0	0	0	1.13498	0	0	1.51413	1.20397	0.693147	0.693147	1.74297	1.58697	4.31303	4.23325	4.25626
Transposon	TIR	hAT	hAT-Charlie	hAT-4876_Ami_vrtrep	6.6995	6.38912	6.59851	0	0	0	0	0	0	0	0	0	0	0	0	0	0	0	0	0	0	0	0	0	0	0	0	0.693147	0.693147	0
Transposon	TIR	hAT	hAT-Ac	hAT-4B_AMi_vrtrep	2.31677001	2.452331804	2.302585093	3.956474246	5.132262782	4.129819487	1.665006953	1.791759469	1.098612289	1.824549292	1.4663363	1.717651753	2.014903021	2.093234727	1.945910149	0	1.098612289	1.098612289	1.098612289	1.098612289	1.098612289	1.349925976	1.265665091	1.558144618	2.327277706	1.658228077	1.098612289	2.140066163	2.024381953	1.945910149
Transposon	TIR	hAT	hAT-Tag1	hAT-5_PTr_dcotrep	2.624668592	1.791759469	2.381228052	1.213023721	0	1.349925976	1.098612289	1.098612289	1.098612289	1.098612289	1.386294361	1.913649615	5.22372851	6.001060855	6.011617603	1.832581464	1.981001469	1.098612289	1.098612289	0	0	1.568615918	1.435084525	1.309920747	1.098612289	2.140066163	1.665006953	2.938574448	3.394508394	2.976804264
Transposon	TIR	hAT	hAT-Tip100	hAT-51_HM_invrep	6.54348	6.85149	6.78543	4.85759	4.58604	4.92518	5.23218	5.45071	5.22344	2.70805	3.55315	3.76892	3.62126	3.70793	3.38627	0.693147	0	0	1.44036	1.13498	1.7148	1.83258	1.38629	0	2.90042	2.7213	2.45893	5.25526	5.17453	5.22498
Transposon	TIR	hAT	hAT-Tip100	hAT-53_HM_invrep	2.5965002	2.312215571	2.374155706	1.894174652	2.360854001	2.126399075	1.760408111	2.288196066	1.516348465	1.717651753	2.260537348	2.095970434	4.933206944	5.235803461	5.050048296	3.520460802	3.285199003	2.772588722	1.098612289	2.014903021	1.315676062	3.686604368	3.561046083	3.591423724	2.315007613	2.438993593	2.48490665	4.088774076	4.193255826	4.425161552
Transposon	TIR	hAT	hAT-Tag1	hAT-5B_PTr_edcotrep	1.272966076	1.435084525	1.558144618	1.098612289	1.098612289	1.272966076	1.098612289	1.098612289	1.098612289	1.504077397	1.098612289	1.098612289	4.869240686	5.727661748	4.533426033	1.493926046	1.572396263	1.335001067	1.299283893	0	1.218156735	1.900959106	1.96165835	1.845826164	1.609437912	1.098612289	0	2.876385516	2.23171081	2.151762203
Transposon	TIR	hAT	hAT-Ac	hAT-5N2_ATr_plnrep	3.825920306	4.007333185	3.87258963	3.44112938	3.791736088	3.351853064	3.723971464	3.945985689	3.308105739	4.204692619	5.664116062	6.318167794	4.242353563	4.718498871	5.075173815	4.982084917	4.732428192	4.505349851	5.053413773	4.292740399	4.220637949	4.602667056	4.734943275	4.617948198	5.472871334	4.398555527	4.773502684	4.418840608	4.325456283	3.931825633
Transposon	TIR	hAT	hAT-Tip100	hAT-68_HM_invrep	5.18265	5.44791	5.02539	3.91202	3.22612	3.7264	3.36464	4.15192	2.95607	0.693147	2.35815	3.18359	2.89037	3.30322	2.47335	0	0	0	0.693147	1.63761	0	0.693147	0.693147	1.38629	1.12393	2.14007	1.17007	3.95975	3.44893	3.36565
Transposon	TIR	hAT	hAT-Tag1	hAT-7_SBi_grasrep	2.245426209	1.658228077	1.887069649	1.679642849	1.686398954	1.745238977	3.065463539	2.788092909	3.496507561	3.739498897	4.955827058	5.344456401	2.014903021	2.226424092	2.734367509	1.098612289	1.354545663	1.098612289	1.098612289	1.446918983	1.098612289	1.981001469	2.197224577	2.583997552	1.386294361	1.609437912	1.098612289	3.245194432	2.089010612	2.126399075
Transposon	TIR	hAT	hAT-Tag1	hAT-7_VV_dcotrep	4.03908	3.72472	4.23221	3.27886	2.9839	3.3673	4.52522	4.49131	4.50222	4.74024	5.16961	5.0756	4.86239	4.73826	4.91755	5.27407	5.48064	5.44726	4.80329	4.88999	4.91464	5.35602	5.11484	5.03293	1.38629	1.56862	1.28093	4.46249	4.74521	4.43912
Transposon	TIR	hAT	hAT-hAT19	hAT-9_AMi_vrtrep	1.996554376	2.128231706	2.856470206	2.10787957	1.791759469	2.079441542	1.349925976	1.098612289	2.397895273	5.26728583	1.504077397	2.442347035	1.098612289	1.098612289	1.098612289	1.098612289	1.098612289	1.098612289	0	1.098612289	0	1.098612289	2.251291799	1.098612289	1.609437912	1.349925976	1.098612289	1.098612289	1.098612289	1.098612289
Transposon	TIR	hAT	hAT	hAT-N1_SP_spurep	5.28384	5.20034	5.06933	3.64134	3.45737	2.98801	4.26067	4.35671	3.78743	4.2485	4.18205	5.38187	4.19971	4.39268	5.10393	3.70541	3.02604	3.61477	4.45601	4.4528	4.27453	4.98751	4.53332	5.31109	4.35868	4.5236	5.01443	3.49043	3.75965	3.68261
Transposon	TIR	hAT	hAT-Ac	hAT-N107_DR_zebrep	5.17397	5.22036	4.98452	3.70035	4.03803	3.744	4.2687	3.98327	4.20042	2.20573	3.06267	3.57062	3.3322	3.35931	3.3267	0.693147	0	1.38629	1.06087	0.693147	0	1.42712	1.51413	0.693147	2.91569	2.94848	2.8094	4.00313	4.12252	4.08478
Transposon	TIR	hAT	hAT-Charlie	hAT-N127_DR_zebrep	5.65515	5.86363	6.10451	5.05695	4.52179	4.80038	4.72583	4.56189	4.74493	2.42775	3.70035	4.02758	4.29388	4.00125	3.43076	0	1.02962	1.04145	3.09801	2.3557	2.91777	2.14843	2.19722	1.94591	2.78638	2.2882	3.31419	4.72916	5.11199	4.80595
Transposon	TIR	hAT	hAT-Ac	hAT-N131_DR_zebrep	6.5336	6.37992	6.53804	5.91782	5.97126	6.06379	5.20839	5.19296	5.0955	4.17219	4.95984	5.23147	3.99689	3.95945	3.90341	4.96517	4.90527	5.15474	4.0228	4.22196	4.76095	3.96686	4.59656	4.54656	3.09801	3.50809	2.75935	5.68698	5.71615	5.56478
Transposon	TIR	hAT	hAT	hAT-N144_DR_zebrep	5.55716	5.31698	5.34759	4.41244	4.45569	4.51525	3.58266	3.7272	3.53925	2.90776	3.77797	3.85418	3.50527	3.44124	3.45957	3.18058	2.99302	3.07765	2.82317	2.59856	2.55511	2.94864	2.74826	2.88066	2.32728	2.48491	2.78809	3.78212	3.64139	3.80772
Transposon	TIR	hAT	hAT-Tol2	hAT-N145_DR_zebrep	6.15874	6.07917	6.09807	4.51186	3.98023	4.18965	4.93513	4.79353	4.83364	1.29928	2.99573	3.44681	3.28653	3.68331	3.46574	0	0.693147	0	1.38629	0	0	0.693147	1.7346	0.693147	2.32239	3.10109	2.23359	4.79133	5.01306	4.88829
Transposon	TIR	hAT	hAT-Blackjack	hAT-N19_CPB_bellii	5.13462	4.35243	4.38203	2.02815	0	0	0	0	0	0.693147	0	0.693147	0	0.693147	0	0	0	1.38629	0	0	0	0	0	0	3.2581	2.28238	1.97408	0.693147	0.693147	0.693147
Transposon	TIR	hAT	hAT	hAT-N2_ATr_plnrep	4.719774843	5.187385806	5.320567975	3.238678452	3.465735903	3.258096538	2.917770732	3.496507561	3.091042453	4.850912452	2.803360381	2.505525937	3.663561646	3.295836866	3.60004824	3.17805383	1.791759469	2.48490665	2.803360381	2.833213344	2.240709689	3.117949906	2.959363889	2.963395015	3.310543013	3.449987546	3.349904087	3.511545439	3.433987204	2.84987957
Transposon	TIR	hAT	hAT-Ac	hAT-N2_PGr_fngrep	0	0	0	0	0	0	0	0	0	3.555348061	5.113191882	5.105945474	0	1.526056303	0	0	0	0	0	0	0	0	0	0	0	0	0	0	0	1.098612289
Transposon	TIR	hAT	hAT-Charlie	hAT-N21_DR_zebrep	6.10766	6.23441	6.09454	5.00858	4.98946	5.16115	5.01728	5.01285	4.97108	3.54873	4.62061	4.91371	3.84873	4.12444	4.27667	0.693147	1.50408	1.20397	2.07944	2.48491	2.28238	2.85811	2.15948	2.48491	2.44235	2.28578	1.97835	5.09068	5.20401	5.26786
Transposon	TIR	hAT	hAT-Ac	hAT-N23_LMi_invrep	5.93867	6.38651	6.3083	4.0985	4.07362	4.54063	6.61918	6.59821	6.4517	6.25212	7.92668	7.88875	6.60394	6.71265	6.83222	5.40368	5.33151	5.37759	5.89776	5.77144	5.86741	6.61204	6.53701	6.4109	4.04888	3.85015	3.975	6.36303	6.38087	6.31073
Transposon	TIR	hAT	hAT	hAT-N31_DR_zebrep	4.99871	5.07892	5.22813	3.60187	4.02931	4.07187	4.88556	4.79671	4.99721	2.59739	4.35671	4.98018	4.08177	4.20842	4.33073	0.693147	0	0	0.693147	2.12026	1.64866	1.46634	2.11453	2.23359	2.83321	2.15948	2.24374	4.55036	4.33365	4.01251
Transposon	TIR	hAT	hAT	hAT-N34_DR_zebrep	3.97406	4.00003	3.8712	2.7586	2.43361	2.79728	4.94553	4.49684	4.72916	4.80402	5.67949	5.65599	4.31482	4.35157	4.3895	3.38099	3.14031	3.20791	3.95508	4.19268	4.17299	4.50645	4.33073	4.60717	2.10684	1.94591	2.07944	4.54542	4.52829	4.55271
Transposon	TIR	hAT	hAT	hAT-N36_DR_zebrep	5.94934	5.68415	5.8693	4.02892	3.78797	3.84303	5.62942	5.16108	5.14166	4.51452	5.85459	5.78023	4.61061	4.15888	4.73766	3.78419	3.69341	3.71086	4.34381	4.2244	4.49051	4.56435	4.82965	4.74057	3.37872	2.90042	3.28653	5.16669	5.19942	5.09477
Transposon	TIR	hAT	hAT	hAT-N36C_DR_zebrep	5.08071	4.98361	4.87435	3.20545	3.45877	2.85263	4.46718	4.67594	4.05275	4.1449	5.03116	5.15521	3.8238	3.85721	3.71086	2.90417	2.98456	2.69124	3.98072	3.47266	3.63172	4.39033	4.21295	4.20965	2.53898	2.93689	2.99573	4.52901	4.30706	4.47481
Transposon	TIR	hAT	hAT-Tip100	hAT-N39_DR_zebrep	5.8785	5.75428	5.91006	4.6902	4.4833	4.28435	4.68374	4.88999	4.49443	2.89037	3.73237	4.27249	3.73312	3.98898	3.88201	1.86587	1.89712	0.693147	2.55529	1.64223	1.38629	2.31501	2.33998	2.64795	2.93784	2.62306	2.4651	4.55598	4.80477	4.85437
Transposon	TIR	hAT	hAT-Charlie	hAT-N4_ALy_edcotrep	2.036882362	2.189789226	2.146581364	1.902659613	1.827350205	2.187072104	1.35812377	1.533929576	1.751267281	1.429466392	2.530166781	2.424802726	6.191681276	6.155000334	6.198478716	3.209948091	3.323545702	3.23065814	2.036882362	1.440361056	1.427117156	2.458930505	2.693126055	2.48490665	1.791759469	1.452252967	1.609437912	5.308267697	5.408166792	5.365354326
Transposon	TIR	hAT	hAT	hAT-N47B_DR_zebrep	2.97892685	3.085979659	2.624668592	1.880313545	2.926741188	1.658228077	2.708050201	2.846199249	2.530166781	2.520000268	2.884180409	2.446295751	3.942464913	4.151039906	4.820281566	2.813412717	2.944438979	2.590264665	2.397895273	1.897120485	2.079441542	2.779508475	3.209948091	3.245194432	2.367123927	2.146581364	2.793205969	5.162881304	5.056245805	4.721467674
Transposon	TIR	hAT	hAT-Ac	hAT-N53_DR_zebrep	5.93288	5.8585	6.01254	5.32376	5.17322	5.5756	5.42655	5.36215	5.14166	4.83804	5.8331	5.87825	5.22318	5.01117	5.08809	5.02331	5.06791	5.14472	4.53818	4.61283	4.4014	5.56202	5.54721	5.56208	4.02672	4.25986	3.89808	5.3303	5.61313	5.21324
Transposon	TIR	hAT	hAT-Ac	HAT-N6_Mad_edcotrep	3.94642	4.29046	4.40265	4.02535	3.76452	3.69718	4.82028	4.75359	4.18628	4.59259	5.30081	5.20401	4.2463	4.90633	5.17696	3.92527	4.28588	4.09434	3.54873	4.37198	4.26736	4.83628	4.78032	4.57985	3.19458	3.23212	2.85263	3.55535	4.14313	4.11321
Transposon	TIR	hAT	hAT-Ac	hAT-N68_DR_zebrep	5.1168	4.80838	5.16479	3.64806	3.75654	3.83826	4.02312	4.11087	4.41401	2.30259	3.15396	3.32324	2.62801	3.42006	3.60705	0	1.38629	0	0	1.38629	0.693147	1.64866	1.28093	0.693147	2.99573	2.42037	2.82477	4.47961	4.64088	4.68398
Transposon	TIR	hAT	hAT	hAT-N70_DR_zebrep	6.02994	5.75376	6.12553	5.15164	5.18178	5.17615	5.2726	5.21661	5.1203	5.19807	5.7489	5.87277	4.85083	4.84681	4.86753	5.26269	5.14556	4.97903	4.93251	4.8916	4.91876	4.68213	4.63149	5.20583	3.46092	3.23414	3.03655	4.98886	5.05169	5.01166
Transposon	TIR	hAT	hAT-Ac	HAT1_DR_zebrep	3.82341	4.03616	3.95995	3.71628	3.69674	3.49347	2.80768	2.43612	2.44569	1.86322	2.81033	2.95027	7.20578	6.96819	7.28811	4.02535	3.89182	3.90399	2.40612	1.46634	2.32456	3.73767	3.63004	3.60884	0	0	0.693147	7.81363	8.34006	8.10876
Transposon	TIR	hAT	hAT-Blackjack	hAT6-2_SP_spurep	5.39514	5.31812	5.24175	3.07578	3.63759	3.04452	2.73003	2.87168	3.50656	2.68558	2.90872	2.30259	9.2362	9.21088	9.23367	4.50351	4.75072	4.51086	3.02852	2.68558	2.7213	4.36522	4.37785	4.54329	0	0.693147	0	7.62462	7.90163	7.73543
Transposon	TIR	hAT	hAT-Blackjack	hAT6-2N1_SP_spurep	6.60191	6.30262	6.2948	5.17857	5.55074	5.03137	5.62492	5.83991	5.75755	5.46911	5.38653	7.54829	5.93942	6.35437	7.19481	4.64439	4.34936	4.46097	5.39363	5.32301	5.56834	4.91265	4.96783	4.95984	5.56944	5.49129	5.41832	5.54294	5.743	5.77721
Transposon	TIR	hAT	hAT	hATa-1_EHux_plnrep	3.586985146	3.484312288	3.167026586	5.175341496	4.919980926	5.431339254	2.217225442	2.598562662	2.677975799	2.214174556	2.313634819	2.32238772	2.564949357	2.386466577	2.573016729	1.734601644	2.159484634	2.294863357	1.926679273	2.014903021	2.451005098	2.383810178	2.583997552	2.417893959	2.512302921	2.1102132	2.131627125	2.667228207	2.155981198	2.417893959
Transposon	TIR	hAT	hAT-hATm	hATm-12_HM_invrep	5.49717	5.2702	5.18825	4.03	4.92241	4.50277	4.82654	4.84714	5.00755	3.14169	3.86073	4.02954	4.21582	4.14086	4.10677	0.693147	0	0	1.91692	2.68558	2.03688	2.00148	2.33537	1.76099	2.97041	2.95651	2.74727	4.57308	4.49747	4.65713
Transposon	TIR	hAT	hAT-hATm	hATm-19_HM_invrep	5.98377	5.90881	6.1391	4.70773	4.61314	4.64823	5.34233	5.43721	5.29102	3.50083	3.7641	5.07204	4.70824	4.40128	4.23411	0.693147	0	0	2.45674	2.18122	2.1848	2.69463	2.15948	1.79176	3.05636	1.9994	2.84781	4.91541	5.05066	4.77597
Transposon	TIR	hAT	hAT-hATm	hATm-33_HM_invrep	5.6863	4.96564	5.57367	4.54633	4.21065	4.49237	4.69135	4.5277	4.28221	2.86537	3.24619	3.92646	4.4175	4.11415	4.38757	0	0.788457	0	1.02962	1.20397	0.693147	2.44235	1.44036	1.54045	2.96183	3.16875	3.24086	4.18628	4.39753	3.89046
Transposon	TIR	hAT	hAT-hATm	hATm-40_HM_invrep	5.72435	5.25457	5.54666	4.46718	4.4175	4.44396	3.84481	3.53515	3.76988	2.2736	3.73767	3.93834	3.23587	3.767	3.66071	0.693147	0	0	0.693147	1.09861	0.693147	0	1.83828	0.693147	1.96166	2.25712	1.981	4.68951	3.96473	4.22926
Transposon	TIR	hAT	hAT-hATm	hATm-47_HM_invrep	5.96708	5.55344	5.50989	4.26268	4.55865	4.68028	4.61841	5.28089	4.93087	3.12926	4.55124	4.41606	4.39308	4.51208	4.43609	0.693147	0	0.693147	2.68558	1.72277	1.55335	1.98413	2.63906	1.62746	2.89037	2.43612	2.78809	5.19195	4.88564	4.8569
Transposon	TIR	hAT	hAT-hATm	hATm-50_HM_invrep	5.0814	5.01893	4.97846	3.94019	3.96217	3.75537	3.80221	4.02981	3.32844	3.29053	4.29955	4.41212	4.70566	4.71339	4.52179	0	0	0	1.97408	2.34181	0.693147	2.5123	2.45101	2.61007	3.21084	3.0513	2.85263	4.10264	3.60466	4.33073
Transposon	TIR	hAT	hAT-hATm	hATm-54_HM_invrep	5.96999	5.98035	5.95785	4.30198	4.36734	4.3954	4.59815	4.54754	4.97377	1.51983	3.16608	3.28185	2.89888	3.56105	3.13549	0.693147	0	0.693147	1.28093	0.693147	0	0.693147	0.693147	1.14513	2.67906	3.53369	2.61007	4.89784	4.80528	5.00653
Transposon	TIR	hAT	hAT	HATN11B_DR_zebrep	4.43082	3.79709	4.42741	4.85648	5.09287	4.78511	2.5539	2.5539	1.99243	2.38482	3.55126	2.10006	2.77259	2.54553	2.95193	2.87437	2.53142	3.38197	2.63906	2.50844	2.48491	2.93689	3.29053	2.82477	1.29098	2.05839	2.46622	3.68888	3.885	3.82864
Transposon	TIR	hAT	hAT-Charlie	HATN16_DR_zebrep	5.58209	5.7311	5.60317	5.18178	5.2706	5.22503	4.60517	4.79643	4.07754	4.38452	5.2087	5.34982	3.16407	3.23475	3.3322	4.7025	4.57127	4.71651	4.02809	4.19637	4.28588	4.57677	4.84024	4.36599	2.8792	2.56495	3.09104	5.14999	5.07517	4.99631
Transposon	TIR	hAT	hAT	HATN17_DR_zebrep	2.324563782	2.745435898	2.862200881	2.054123734	2.564949357	2.397895273	2.550866036	2.197224577	2.879198457	2.131627125	2.197224577	3.044522438	5.041810912	5.244763625	4.621191162	4.0831707	3.841600541	4.104294893	2.772588722	2.251291799	2.00148	4.25561271	3.952990269	4.21582446	2.164964207	2.917770732	2.371578364	4.719489452	5.18178355	4.36358895
Transposon	TIR	hAT	hAT-Pegasus	PegasusA_angrep	1.098612289	1.098612289	1.478102963	1.609437912	0	1.223775432	1.609437912	1.545924999	1.386294361	1.098612289	1.609437912	1.098612289	6.441942854	6.232840867	6.738152495	1.098612289	1.098612289	0	0	1.098612289	1.098612289	1.637609345	1.648658626	1.526056303	0	1.098612289	1.098612289	1.098612289	1.098612289	1.098612289
Transposon	TIR	hAT	hAT-Tag1	TAG1_athrep	2.07944	1.38629	0.693147	2.12026	1.38629	1.29928	5.80614	5.14652	5.46987	4.85723	5.50939	4.84943	4.32464	4.44897	4.22627	5.22036	5.28066	5.18599	4.94811	5.57973	5.33994	5.28658	4.7362	5.28489	0	0.693147	0	4.78877	4.70178	4.45176
Transposon	TIR	hAT	hAT-Ac	TOL2_OL_vrtrep	5.03044	4.8752	4.79026	3.27083	3.55535	2.90612	4.39856	4.27203	4.11087	3.79923	3.18989	4.64118	3.21314	3.86423	4.40672	3.75342	3.49651	3.39003	3.69718	4.12174	3.96398	3.65498	3.63759	3.68051	4.50719	4.14841	4.44656	4.00733	3.89182	3.98898
Transposon	TIR	hAT	hAT-Tag1	VIHAT3_dcotrep	4.65464	4.62216	4.47596	5.11408	5.43808	5.0729	4.19453	3.87224	3.71536	3.85015	4.33292	4.30298	3.57288	3.4494	3.71008	3.17426	2.6647	3.55535	4.01267	4.0084	4.0265	3.95576	3.66821	3.77171	1.6864	1.85332	2.10413	2.59371	2.34541	2.77675
Transposon	TIR	hAT	hAT-Tag1	ZhAT12_ZM_grasrep	2.890371758	3.695110004	3.417726684	2.472926844	2.595254707	1.945910149	1.99242971	2.708050201	1.558144618	1.488076733	1.558144618	2.219203484	4.371555756	4.079956549	4.38618423	5.463505481	5.602790182	5.611667186	2.277267285	1.504077397	2.356652735	6.615619303	5.845325439	6.37374632	3.030824283	3.135494216	3.157000421	2.360854001	1.99242971	2.233591864
Transposon	TIR	hAT	hAT-Tag1	ZhAT14_ZM_grasrep	4.620758061	4.727387819	5.342334252	2.76361735	2.360854001	2.379546134	1.609437912	1.098612289	1.349925976	2.197224577	2.1690537	2.288196066	2.014903021	1.32175584	1.791759469	0	1.098612289	1.098612289	0	0	0	1.504077397	1.098612289	0	1.609437912	1.098612289	1.098612289	2.351375257	2.32238772	2.708050201
Retrotransposon	LTR	Gypsy	Gypsy	ALISEI_I_plnrep	3.68759	3.71421	3.76167	4.12147	4.27702	4.20757	5.90724	5.89049	5.8971	6.62675	6.11004	6.06121	5.43555	5.43082	5.42868	7.25543	7.21647	7.22273	5.66026	5.69206	5.66909	7.33528	7.34606	7.35337	0	0.693147	0	5.00379	4.97814	4.96282
Retrotransposon	LTR	Gypsy	Gypsy	ALISEI_LTR_plnrep	0	0	0	1.32914	0	0	3.14314	3.63759	3.03145	2.97893	2.83773	2.90417	3.91413	3.9873	3.95299	9.98964	10.0017	9.98976	3.3515	2.54553	3.28569	10.0517	10.0497	10.0572	0	0	0	5.74939	5.37667	5.72359
Retrotransposon	LTR	Gypsy	Gypsy	ARET1I_plnrep	3.8127	4.29274	4.74057	2.99096	3.15208	2.98315	2.27213	2.15176	2.18324	1.26113	1.79176	1.70475	1.86587	2.07944	1.652	1.48808	1.26369	1.35239	2.25129	1.74297	1.16315	1.38629	1.7463	0.980831	4.68727	5.15801	4.93327	1.50408	1.3173	1.47085
Retrotransposon	LTR	Gypsy	Gypsy	ATGP2I_athrep	3.08779	2.94284	3.2581	2.81704	2.61102	2.76542	3.38083	3.32504	3.53318	2.39983	2.52092	2.61132	4.3848	4.20864	4.29331	2.59026	2.41759	2.79576	3.95989	3.55978	3.53854	2.907	2.83222	2.8084	6.77212	6.8321	6.86456	4.12915	4.05652	4.29667
Retrotransposon	LTR	Gypsy	Gypsy	ATGP3A_I_athrep	3.7272	3.97795	4.2854	1.94591	1.77135	1.13708	1.84583	1.99243	1.30221	4.34812	5.66816	5.46383	2.63508	2.94067	3.04884	1.04982	1.13251	1.24521	1.38629	1.15268	1.02339	1.87692	1.32442	1.21767	3.2158	3.29584	3.8712	2.10297	2.09544	2.00821
Retrotransposon	LTR	Gypsy	Gypsy	ATGP8I_athrep	3.81645	3.5964	3.66356	4.60996	4.53499	4.57965	3.83327	3.68888	3.97656	3.37612	3.64852	3.53733	5.13057	5.05475	5.15818	4.1661	4.07616	4.02447	3.734	3.65883	3.59198	4.3806	4.2218	4.2256	3.40937	3.81771	3.75104	4.75274	4.5721	4.69237
Retrotransposon	LTR	Gypsy	Gypsy	ATHILA-7_SBi-I_grasrep	5.265277512	4.524502283	4.809856445	1.386294361	1.098612289	1.098612289	1.098612289	1.299283893	1.349925976	1.268512575	1.945910149	1.386294361	1.4663363	1.098612289	1.4663363	3.044522438	2.397895273	1.860752118	0	1.098612289	1.098612289	1.945910149	2.708050201	1.609437912	1.945910149	1.845826164	1.4663363	1.526056303	1.098612289	1.648658626
Retrotransposon	LTR	Gypsy	Gypsy	ATHILA6A_I_athrep	5.75121	5.57811	5.37528	3.84099	3.78419	3.4012	4.57912	4.69788	4.43478	4.0555	3.67883	5.2752	3.53612	3.73767	4.67149	3.81614	3.71008	3.8471	4.07996	4.32082	4.43421	3.89182	3.61477	3.32195	4.63889	4.51816	4.72147	4.15888	4.10382	3.93462
Retrotransposon	LTR	Gypsy	Gypsy	ATLANTYS_LC_I_edcotrep	1.79176	1.38629	1.38629	0.693147	1.45225	1.66073	3.05595	3.2581	3.33957	4.66142	5.23073	5.25827	5.16097	5.00446	4.71095	3.29053	2.38774	3.41225	3.09689	3.52636	3.42751	2.83321	3.43399	2.63906	4.70048	4.46325	4.43944	3.26423	3.65584	3.39897
Retrotransposon	LTR	Gypsy	Gypsy	ATLANTYS1_I_athrep	2.33336	2.43426	2.25712	4.75359	4.59665	4.55775	3.97298	3.92527	3.66808	3.0016	2.25379	2.41591	3.38439	3.69387	3.64806	0.693147	0.693147	1.14513	2.99016	3.2581	3.32195	0.693147	0	0.693147	5.55037	5.73309	5.29115	3.29053	3.2335	3.52636
Retrotransposon	LTR	Gypsy	Gypsy	ATLANTYS2_I_athrep	2.03292	0.995427	1.35644	4.51743	4.56163	4.6454	3.23212	4.33073	3.97835	0.693147	1.30406	0.693147	1.08261	1.58697	1.04982	0	0	0.693147	4.8828	4.2697	5.23492	0	0.693147	1.38629	5.35265	5.56299	5.69036	3.54578	3.11221	3.16515
Retrotransposon	LTR	Gypsy	Gypsy	ATRE1_I_athrep	3.83531	3.93634	3.99749	0	0.693147	0	2.71753	2.70805	3.17805	5.07696	5.52716	5.55628	4.08478	4.48058	4.67948	2.69848	2.5539	2.93689	1.56218	1.8894	2.4108	2.71753	3.00992	2.63906	1.38629	1.09861	0	5.00106	5.09463	5.06078
Retrotransposon	LTR	Gypsy	Gypsy	BNINTMO_dcotrep	5.24878	5.38602	5.31812	2.78638	2.07944	3.06339	1.55335	0	0.929535	1.15268	1.63761	1.7463	3.04732	3.22591	3.35785	3.01161	3.00992	3.31216	1.335	1.3622	0.99853	3.1118	3.39376	3.89589	0	0	0	2.6647	2.61496	2.40612
Retrotransposon	LTR	Gypsy	Gypsy	CAGYPSY1_edcotrep	4.00612	4.10539	4.09878	4.44265	4.45899	4.93644	4.11087	4.42531	4.62497	3.58678	4.13677	3.75081	6.02014	5.96847	5.83002	3.68051	3.73767	3.22251	4.10134	4.24691	3.80171	3.84043	4.03182	4.09737	1.7148	1.55814	2.44717	4.39136	4.50535	4.3412
Retrotransposon	LTR	Gypsy	Gypsy	CER1_celrep	1.99243	1.99243	2.5123	3.43692	3.65989	3.61477	4.87813	4.64225	4.43082	2.96183	3.10395	2.65926	1.94591	1.38629	2.30259	1.31219	1.23214	0.693147	4.74493	5.29402	5.08229	2.07944	1.23214	1.29928	0	0	0.693147	1.81916	1.33977	1.67398
Retrotransposon	LTR	Gypsy	Gypsy	CEREBA_HV_I_grasrep	5.0448	4.76354	5.09812	2.52195	2.55578	2.47694	3.63034	3.78676	4.07923	2.70538	2.45959	2.83589	3.43168	3.41668	3.30717	2.84815	3.11743	2.8799	3.6465	3.49893	3.70424	3.28984	3.29884	2.76819	2.46148	2.53142	2.33537	2.99072	2.64381	2.90612
Retrotransposon	LTR	Gypsy	Gypsy	CINFUL2_I_grasrep	5.15007	4.41159	4.38369	3.83198	3.80029	3.40631	0.693147	0.693147	0.693147	3.49651	3.35574	2.2882	0.693147	0	0.693147	0	0.693147	0	1.34373	2.30259	0.693147	0	0	0	1.23214	1.81916	0.693147	1.67398	1.38629	1.29928
Retrotransposon	LTR	Gypsy	Gypsy	CINFUL2A_I_grasrep	2.98023	3.98279	3.75342	5.5835	5.5379	5.55117	1.09861	1.09861	1.81916	1.87877	1.59109	2.37279	0.693147	0.693147	0.693147	3.07578	1.69645	2.37955	2.05839	2.21557	1.94591	2.81341	2.70805	2.61496	2.31677	2.94444	3.00815	0.693147	1.29928	1.55335
Retrotransposon	LTR	Gypsy	Gypsy	CRM_INT_grasrep	5.28201	5.30677	5.26956	4.08755	3.91527	3.95236	4.95366	5.14934	5.09094	3.68976	3.50155	3.26365	4.62536	4.80478	4.5556	3.2553	3.21084	3.3673	5.38009	5.60991	5.52806	3.56168	3.45902	3.33103	3.18043	3.10459	2.91476	2.41022	2.64302	2.29873
Retrotransposon	Crypton	Gypsy	Gypsy	CRM-I_OS_oryrep	5.16264	5.38331	5.32683	3.64163	3.48607	3.61238	4.05495	4.06427	3.90832	3.76516	3.53179	3.32969	3.26716	3.49786	3.5223	2.68622	2.90793	2.95369	4.16024	4.00898	3.95797	3.29289	3.40901	3.45708	2.56802	2.47374	2.60554	3.157	2.97192	3.23587
Retrotransposon	LTR	Gypsy	Gypsy	DEA1_mcotrep	2.57539	2.70805	2.67542	3.20032	2.89509	2.74849	3.98368	3.91627	3.68396	3.51601	3.3496	3.82459	5.07251	5.24637	4.99328	3.08464	2.92674	3.0026	3.82763	4.03645	3.75805	3.47794	3.5597	3.5034	3.50255	3.20078	3.08725	4.56562	4.37979	4.79303
Retrotransposon	LTR	Gypsy	Gypsy	DEL_LH_mcotrep	3.35055	3.37834	3.7919	5.02053	5.19177	5.30692	2.54636	2.32283	2.28747	3.84382	3.73986	3.72072	3.56895	3.62807	3.58077	2.81224	2.67458	2.73835	2.83148	3.0483	3.13286	2.8834	2.91125	2.96976	3.64896	3.5158	3.69238	4.23772	4.20808	4.07507
Retrotransposon	LTR	Gypsy	Gypsy	DGLT-A1_I_invrep	5.27811	5.04319	5.05731	3.53369	3.26002	3.09819	3.67911	3.99172	3.66221	3.80399	4.00812	4.95521	3.40763	3.44174	4.12606	2.91669	2.73914	2.74213	3.9982	3.28895	3.50348	3.06298	3.0874	2.80896	4.01895	4.58369	4.34705	3.42535	3.41444	3.94019
Retrotransposon	LTR	Gypsy	Gypsy	DIASPORA_I_edcotrep	1.32175584	1.098612289	1.098612289	4.952532905	5.616771098	5.227535396	0	1.178654996	1.098612289	1.335001067	1.669156712	1.504077397	2.240709689	0	1.421386371	1.098612289	0	1.098612289	0	0	1.098612289	1.098612289	1.098612289	1.655422239	2.375610622	2.525728644	2.136137279	1.098612289	1.860752118	1.098612289
Retrotransposon	LTR	Gypsy	Gypsy	DM176_drorep	3.016485429	3.011128147	3.122232757	1.673975809	1.278873391	1.313723668	1.945910149	2.369524791	2.175832955	6.243828979	2.670002133	3.10493191	2.197224577	2.05907428	2.713369363	2.186585965	2.497979164	2.218168166	1.098612289	1.609437912	1.810108426	2.012232792	1.864785308	1.837016415	1.558144618	2.041220329	1.902659613	3.186352633	3.224022558	2.982484913
Retrotransposon	LTR	Gypsy	Gypsy	GmGYPSY11_I_dcotrep	5.27586	5.33923	5.34361	4.733	4.66172	4.67283	5.03545	5.11589	5.08429	3.47713	3.67499	3.29238	3.13375	3.19206	3.22662	3.0558	3.29844	3.00384	4.82263	4.93148	5.08319	3.19385	3.78707	3.48583	4.37165	4.64642	4.55253	2.89708	3.0658	2.82177
Retrotransposon	LTR	Gypsy	Gypsy	GmOgre_I_dcotrep	0.961409	1.91239	1.30625	4.45131	4.28748	4.47853	1.79176	2.30259	0.693147	0.693147	0	0	0.961409	1.33977	1.06784	3.4012	2.56495	2.30259	2.07944	2.02228	2.77259	3.17805	2.89037	2.97553	6.16775	6.38772	5.76832	2.07944	2.63906	1.79176
Retrotransposon	LTR	Gypsy	Gypsy	GYCUME1_LTR_edcotrep	5.02482	5.03231	4.91404	4.27667	4.37418	4.16803	4.55808	4.95637	4.74718	3.10608	3.94932	4.88616	3.78094	3.8828	3.84837	1.20397	0	0.693147	2.58022	2.35815	1.67398	2.37279	2.17125	1.4604	3.2581	3.63759	2.46622	5.00529	5.28281	4.33526
Retrotransposon	LTR	Gypsy	Gypsy	Gyp_MD_I_mamrep	2.37491	1.43075	2.18122	0.693147	0.693147	0	4.26362	5.17372	4.29683	4.72865	4.2403	3.90053	0	0	0	0.693147	0	0	4.59656	4.48058	4.59656	0	0	0	4.29955	3.8986	4.18459	0.693147	0	0.693147
Retrotransposon	LTR	Gypsy	Gypsy	GYPSHAN4_I_MT_dcotrep	5.00143	4.94164	4.83161	3.58025	3.38613	3.75573	3.88466	3.90695	3.87671	2.88022	2.5949	2.71365	3.19236	3.11795	3.22147	3.10088	3.192	3.15329	4.16041	4.20886	4.12713	3.24368	3.29197	3.29029	5.09365	5.11959	5.14731	3.03732	3.23547	2.92047
Retrotransposon	LTR	Gypsy	Gypsy	GYPSO_I_oryrep	1.098612289	1.609437912	1.639744008	1.299283893	1.098612289	1.098612289	1.098612289	1.32175584	1.652922599	2.014903021	2.358155079	2.1768155	2.555287447	2.335374593	2.383810178	1.098612289	0	0	0	1.098612289	1.098612289	3.044522438	2.036882362	2.079441542	6.859120553	6.980773372	6.860355448	1.280933845	1.098612289	0
Retrotransposon	LTR	Gypsy	Gypsy	GYPSOR1_I_grasrep	3.32055	3.39649	3.01246	4.41371	4.53098	4.41198	3.78979	3.79343	3.73265	3.58894	4.02795	4.07867	4.1756	4.15131	4.25358	3.90898	3.81509	3.69929	3.85798	3.87029	3.91336	4.21775	4.17712	4.06732	2.30259	2.51712	2.41459	4.95424	4.96095	5.07644
Retrotransposon	LTR	Gypsy	Gypsy	GYPSOR1_LTR_grasrep	5.55554152	5.496581988	5.277384801	1.945910149	2.371578364	2.131627125	0	1.421386371	1.717651753	3.245194432	2.833213344	1.985914895	1.704748092	1.280933845	2.061422673	1.098612289	1.098612289	1.791759469	1.871802177	0	1.504077397	1.985914895	1.386294361	1.832581464	2.48490665	2.036882362	2.128231706	1.299283893	1.504077397	1.098612289
Retrotransposon	LTR	Gypsy	Gypsy	Gypsy-1_ACe-I_invrep	0.693147	0.693147	0	0	0	0	0.693147	0	0	1.38629	1.79176	0	2.63906	2.70805	3.07578	0	0.693147	1.20397	0.693147	0	0	0	0.693147	0	4.95053	4.99119	5.40268	0.693147	1.38629	1.38629
Retrotransposon	LTR	Gypsy	Gypsy	Gypsy-1_Adi-LTR_invrep	4.985884847	5.564520407	5.368309738	4.48863637	3.90197267	4.102643365	1.098612289	2.09714147	1.550598322	2.890371758	3.401197382	3.540959324	2.833213344	2.564949357	1.945910149	0	1.098612289	0	1.098612289	1.609437912	1.945910149	3.044522438	2.708050201	2.197224577	1.945910149	1.609437912	1.945910149	2.197224577	2.397895273	3.135494216
Retrotransposon	LTR	Gypsy	Gypsy	Gypsy-1_CH_fungi	0.693147	1.07264	0.693147	0.693147	0.693147	0	0	0	0	0.693147	0	0	4.54002	5.12247	4.66199	0	1.38629	0	0	0	0.693147	0	0.693147	0.693147	0	0	0	3.13549	3.69442	3.36346
Retrotransposon	LTR	Gypsy	Gypsy	Gypsy-1_CP-I_edcotrep	1.900959106	1.930758802	2.150393826	3.037445071	2.793205969	2.999295916	1.639744008	1.530189056	1.593308531	2.022625128	2.42108787	2.871681512	3.527536304	3.513203765	3.525183361	2.047692843	2.275556078	2.442347035	2.036882362	1.864785308	1.675154489	2.683128896	2.719886541	2.618854622	4.40366581	5.184588601	4.40366581	4.134696046	3.988422778	3.813871994
Retrotransposon	LTR	Gypsy	Gypsy	Gypsy-1_FV-I_edcotrep	5.26594	5.36064	5.18915	3.92803	4.02457	3.84863	3.55703	3.46851	3.35428	3.0239	2.47249	2.76812	4.73222	4.69727	5.07968	3.56145	3.24357	3.3095	3.2884	3.62219	3.40256	3.56784	3.54052	3.48226	5.95653	6.01022	6.03651	2.99795	2.68386	2.79685
Retrotransposon	LTR	Gypsy	Gypsy	Gypsy-1_Mad-I_edcotrep	2.028148247	1.900959106	1.916922612	3.850147602	3.479040749	3.386807678	1.098612289	1.791759469	2.09714147	2.327277706	2.708050201	2.442347035	2.140066163	2.381228052	2.602689685	2.833213344	2.995732274	2.397895273	2.197224577	2.014903021	2.054123734	3.202746443	3.198673118	2.793205969	1.648658626	2.351375257	1.864785308	4.970805862	5.433722004	4.922066341
Retrotransposon	LTR	Gypsy	Gypsy	Gypsy-1_PAb-I_plnrep	2.358866178	1.926679273	2.185763595	2.636826271	2.687146568	2.720097342	2.191461335	2.157345425	2.136137279	2.839809191	2.863343086	2.962232365	3.36597772	3.360503851	3.422560882	6.896204829	6.800981543	6.801149544	1.737398316	1.73214746	1.937471789	6.555834729	6.560957113	6.548379548	1.883390161	2.282382386	1.533929576	3.940903908	3.952938436	4.04084357
Retrotransposon	LTR	Gypsy	Gypsy	Gypsy-1_PAb-LTR_plnrep	0	0	0	0	0	0	0	0	0	0	0	0	0	0	0	5.93959	5.92001	5.91979	0	0	0	6.41017	6.40867	6.39196	0	0	0	0	0	0
Retrotransposon	LTR	Gypsy	Gypsy	Gypsy-1_PBa-I_invrep	1.609437912	1.609437912	1.280933845	1.098612289	1.098612289	1.098612289	2.197224577	1.791759469	2.079441542	5.395444077	0	1.609437912	1.098612289	1.098612289	1.609437912	1.098612289	0	0	0	0	1.609437912	0	1.945910149	1.098612289	1.280933845	1.945910149	1.098612289	1.098612289	1.386294361	1.098612289
Retrotransposon	LTR	Gypsy	Gypsy	Gypsy-1_PD-I_mcotrep	3.26194	3.2581	3.45527	5.13971	5.14928	4.95583	1.17007	1.22867	0.693147	1.79176	0.693147	1.16315	1.5976	2.62599	2.02537	1.35812	1.1827	0.693147	1.60944	0.693147	0.693147	0.916291	1.08401	1.09861	0.693147	1.67398	1.38629	0.693147	1.19392	0.693147
Retrotransposon	LTR	Gypsy	Gypsy	Gypsy-1_XT-I_tropicalis	0	0	0	0	0	0.693147	2.75154	1.7346	3.14988	0	1.38629	0	6.44889	6.18503	6.38407	0	0	0	2.61496	2.75154	1.7346	0	0	0	0	0	0	2.48491	1.38629	3.4012
Retrotransposon	LTR	Gypsy	Gypsy	Gypsy-10_BRa-I_edcotrep	5.315017146	5.505839537	5.497565687	1.098612289	1.488076733	1.558144618	1.098612289	1.634130525	1.574036616	1.584120104	1.96165835	2.151762203	1.882731465	1.757857918	2.108769735	2.04922715	1.98736737	1.963077655	1.864785308	1.791759469	1.77070606	1.885691427	1.857142946	1.92750466	1.098612289	1.272966076	1.455286233	1.776491843	1.504077397	1.272966076
Retrotransposon	LTR	Gypsy	Gypsy	Gypsy-10_DAn-I_invrep	3.342356377	3.649213042	3.730398006	2.2077512	2.11554683	1.909542505	2.606054389	2.63905733	2.708050201	5.906015585	3.912023005	4.149681503	2.527630834	2.590264665	2.977833034	2.63905733	2.422383873	2.468099531	1.547562509	2.282382386	1.945910149	2.869318349	2.625986564	2.95193189	2.479994605	2.45673863	2.324091171	1.956838785	2.172223528	2.178532067
Retrotransposon	LTR	Gypsy	Gypsy	Gypsy-10_Mad-I_dcotrep	3.84809	3.49195	3.28613	3.102	3.07487	2.67233	4.6741	4.68348	4.66512	5.18651	4.77106	4.79082	2.58092	3.17805	3.23927	2.41459	1.99868	2.19026	4.78708	4.71022	4.98712	2.11021	2.09779	2.00409	5.20931	5.301	5.04166	2.4651	2.4645	2.34676
Retrotransposon	LTR	Gypsy	Gypsy	Gypsy-10_PAb-I_plnrep	4.74274	4.58209	4.65787	5.48339	5.55452	5.4202	5.25262	5.15999	5.19884	5.87214	5.93395	5.94698	4.9063	4.85398	4.8361	6.11799	6.09638	6.09371	5.21854	5.17776	5.20451	6.17708	6.17712	6.18995	5.82604	5.94542	6.0052	5.45909	5.51957	5.49287
Retrotransposon	LTR	Gypsy	Gypsy	Gypsy-10_PAb-LTR_plnrep	0	0	0	0	0	0	0	0	0	0	0	0	0	0	0	5.85254	5.92865	5.89705	0	0	0	6.28032	6.18571	6.27423	0	0	0	0	0	0
Retrotransposon	LTR	Gypsy	Gypsy	Gypsy-10_PBa-LTR_invrep	6.626717749	6.702136026	6.735949834	5.276414235	5.462983988	5.348059458	3.545779572	3.779633817	2.856470206	1.824549292	3.632309103	3.832979798	3.601868986	3.471966453	3.310543013	2.468099531	1.098612289	2.433613355	1.098612289	2.468099531	2.240709689	2.00148	2.054123734	2.151762203	2.734367509	2.00148	2.32238772	4.685209817	4.825108606	5.129898715
Retrotransposon	LTR	Gypsy	Gypsy	Gypsy-10_PMar-I_invrep	1.098612289	0	1.098612289	0	0	1.098612289	0	0	1.098612289	0	0	0	5.078293943	5.459585514	4.457250056	0	2.197224577	1.098612289	0	0	0	1.609437912	2.397895273	1.609437912	1.098612289	0	0	2.197224577	2.079441542	2.014903021
Retrotransposon	LTR	Gypsy	Gypsy	Gypsy-10_RC-I_edcotrep	5.149	5.09498	5.24239	3.66138	3.86834	3.74141	3.54833	3.64006	3.60283	2.86985	3.12457	3.22883	4.34	4.35243	4.19475	2.95369	2.86727	2.81717	3.5275	3.58185	3.49624	3.01204	3.16958	3.22928	5.47127	5.59722	5.24855	2.81939	2.93946	2.62402
Retrotransposon	LTR	Gypsy	Gypsy	Gypsy-10_ST-I_edcotrep	3.50348	3.49114	3.54682	3.25622	3.30811	3.32754	3.97817	3.91806	3.74011	1.72277	1.53533	1.40464	2.93532	3.11434	3.14477	1.90298	1.93968	2.16905	5.03806	4.82911	5.14544	1.90251	2.11334	2.07944	1.51983	1.71765	2.0149	3.05679	3.26865	3.3482
Retrotransposon	LTR	Gypsy	Gypsy	Gypsy-100_MLP-I_fungi	4.88204	4.92508	5.2601	0.693147	0.693147	0.965081	1.38629	0.693147	0.693147	0.693147	0	0	1.38629	1.38629	0.693147	0	1.29928	0.693147	1.79176	1.67398	1.68355	0	0	0	0	0.693147	0.693147	3.52636	3.17805	2.89037
Retrotransposon	LTR	Gypsy	Gypsy	Gypsy-100_SB-I_grasrep	3.73767	3.7329	3.37417	1.38629	0.693147	0	2.10476	1.81238	2.157	4.09196	5.02341	4.92825	4.40468	4.43367	4.28662	2.26375	1.9231	1.81708	1.90759	2.109	2.45674	1.8589	2.08774	2.164	0.693147	0.693147	0	2.99302	3.47053	3.17127
Retrotransposon	LTR	Gypsy	Gypsy	Gypsy-103_CCri-I_plnrep	0	0	0	1.098612289	1.609437912	1.098612289	3.36729583	3.122994682	2.913903806	1.945910149	1.686398954	1.098612289	1.098612289	1.609437912	1.609437912	3.406738667	3.390025205	3.731699451	1.098612289	0	0	4.787491743	5.476463552	5.402677382	2.197224577	2.351375257	1.609437912	0	0	0
Retrotransposon	LTR	Gypsy	Gypsy	Gypsy-105_SB-I_grasrep	0.693147	0	0	1.06784	2.00882	0.916291	3.52846	3.44772	3.77404	5.11628	6.19956	5.77104	1.73114	1.56218	2.01807	1.65292	0.980831	1.20397	3.68517	3.78587	4.27975	1.2852	1.75402	1.47727	0	0	0	1.79176	1.04145	1.79176
Retrotransposon	LTR	Gypsy	Gypsy	Gypsy-108_ZM-I_grasrep	1.94591	1.32914	0.693147	2.05645	2.57588	2.3979	2.61982	1.9534	3.4304	1.67398	0.900787	1.31219	5.25084	5.31375	4.95676	0.693147	1.06087	0	2.74442	2.51023	2.85715	0.693147	0.693147	0.693147	1.79176	0	0	0.897943	0.965081	1.43508
Retrotransposon	LTR	Gypsy	Gypsy	Gypsy-109_ZM-I_grasrep	2.440606391	3.209948091	3.290887602	1.516348465	1.098612289	1.776491843	1.609437912	1.871802177	1.272966076	1.550598322	1.673975809	1.645156346	1.819158984	2.48490665	2.442347035	3.98692452	3.008154794	3.214654929	0	1.493926046	1.098612289	3.378014046	3.48176918	3.943521672	4.965637928	5.231108617	5.091293197	3.840986619	3.996081026	4.084294226
Retrotransposon	LTR	Gypsy	Gypsy	Gypsy-11_BRa-I_edcotrep	5.507361993	5.011967739	4.838921278	2.197224577	2.451005098	3.002851869	1.299283893	1.098612289	1.4663363	1.778856584	2.144580664	1.916922612	2.571084346	3.020424886	3.001714345	2.495953739	2.880220407	2.941038467	1.098612289	1.429466392	1.309920747	3.283914221	2.63905733	2.592534593	2.772588722	2.363209715	1.819158984	1.589235205	1.932211029	1.673975809
Retrotransposon	LTR	Gypsy	Gypsy	Gypsy-11_FV-I_edcotrep	5.2906	5.40205	5.34869	4.09634	4.13517	4.21769	2.86184	2.67975	2.69959	3.13977	3.57067	3.62591	3.80515	3.86061	3.63932	2.70421	2.58302	2.76689	2.95418	2.9135	2.99943	2.85973	2.94258	2.67644	3.86262	3.85887	3.76764	2.86096	2.68762	3.02479
Retrotransposon	LTR	Gypsy	Gypsy	Gypsy-11_MLP-I_fungi	0	0.693147	1.7346	1.38629	0.693147	0.693147	1.69168	1.88273	1.63761	0	0.693147	0.693147	4.2275	4.03601	4.27047	3.3499	3.17805	3.30505	2.07944	2.65676	2.87639	3.43756	3.16758	2.7213	2.65926	2.66723	2.37669	5.37759	5.02169	4.88063
Retrotransposon	LTR	Gypsy	Gypsy	Gypsy-11_PAb-I_plnrep	2.87586	3.39227	3.2581	4.65575	4.67166	4.25942	4.77557	4.7855	4.84885	4.67595	5.14434	5.13193	5.61134	5.59529	5.55137	7.1824	7.1464	7.16285	5.0245	4.96312	4.96343	7.03118	7.03206	7.03458	2.10843	2.11099	2.65089	5.82037	5.77286	5.78336
Retrotransposon	LTR	Gypsy	Gypsy	Gypsy-11_PAb-LTR_plnrep	1.18562	0	0	0	0	0	1.79176	0	1.38629	3.06027	3.46574	3.60705	3.37417	2.07944	2.4681	8.04954	7.98418	8.02442	0	0	1.29928	8.11081	8.10849	8.10822	0	0	1.38629	6.15091	6.06578	5.95287
Retrotransposon	LTR	Gypsy	Gypsy	Gypsy-11_Pru-I_edcotrep	3.27956	3.01117	3.22098	3.84124	4.30407	4.11087	3.1118	2.77689	2.97631	1.54592	2.22334	2.19192	3.01968	2.83688	2.86996	2.72332	2.37955	2.31583	2.60852	2.3979	2.17853	2.71975	2.34455	2.27877	5.3222	5.02857	4.84966	2.10843	1.38629	2.21102
Retrotransposon	LTR	Gypsy	Gypsy	Gypsy-11_SB-I_grasrep	1.8068	1.22723	1.38629	3.44468	2.60605	2.91894	6.18117	5.98116	5.96517	1.87584	1.99606	1.63519	3.15167	3.2852	3.41408	1.981	2.34074	2.34181	6.20986	6.31128	6.41766	1.94976	2.36713	2.4311	2.48491	1.38629	1.79176	3.53473	3.26275	3.31872
Retrotransposon	LTR	Gypsy	Gypsy	Gypsy-11_SMo-I_plnrep	0.944462	1.67398	0.693147	2.10191	1.38629	1.88707	3.92197	3.91202	3.59515	2.86996	2.57909	3.05314	4.1504	4.76569	3.96891	2.69724	2.44408	2.92226	4.54514	3.96398	4.45536	3.63759	3.35574	3.09608	6.78339	6.79417	6.9364	3.78963	3.57278	3.84043
Retrotransposon	LTR	Gypsy	Gypsy	Gypsy-110_SB-I_grasrep	0	0	1.38629	2.95193	2.07944	2.30259	2.27133	2.53142	1.42139	4.17053	5.00491	4.84681	2.30259	1.93634	1.89712	0	0	0.693147	2.58669	2.10843	2.18979	1.20397	0.693147	0.693147	0	0	0.693147	1.29928	2.30259	1.09861
Retrotransposon	LTR	Gypsy	Gypsy	Gypsy-111_SB-I_grasrep	2.65926	2.93689	3.29053	0.693147	0.693147	0.693147	1.55537	1.38629	1.73114	1.54045	1.49549	1.79176	6.06379	6.00583	5.77752	1.7148	2.2736	1.44345	2.13236	1.49962	1.80829	1.66255	1.23547	1.23214	0	0	0	1.17007	1.38629	0.693147
Retrotransposon	LTR	Gypsy	Gypsy	Gypsy-112_ZM-I_grasrep	4.4587	4.9046	4.89635	1.90424	1.28093	1.71172	3.51727	3.62296	3.53392	2.82477	2.47444	2.5177	5.54542	5.41584	5.47499	1.91692	1.69378	1.51732	3.36636	3.41225	3.19747	0.693147	1.27123	1.09861	0.693147	0	0	1.09861	1.27297	1.11803
Retrotransposon	LTR	Gypsy	Gypsy	Gypsy-113_ZM-I_grasrep	4.23522	4.34879	3.50116	6.08927	6.14111	6.48522	2.59739	2.18792	2.54945	4.62889	5.57595	5.1448	4.40296	3.62608	3.70336	3.99309	4.35671	4.31897	2.41591	2.38312	2.25813	3.96398	4.50474	4.01638	0	0	0	3.90608	3.49953	3.87582
Retrotransposon	LTR	Gypsy	Gypsy	Gypsy-114_ZM-I_grasrep	1.08401	1.34373	2.07944	2.05127	0.926764	1.49549	2.63906	2.10006	1.23676	1.79176	2.17853	2.3557	6.1809	5.59418	5.49935	0	0.693147	1.38629	2.45893	2.64998	3.3322	1.23214	0.693147	0	0	0	0	1.38629	0.900787	0.693147
Retrotransposon	LTR	Gypsy	Gypsy	Gypsy-116_SB-I_grasrep	1.38629	0.693147	1.38629	1.38629	2.19722	1.38629	1.67398	1.09861	1.19214	1.01857	1.49165	1.17007	6.00817	6.09907	6.15297	2.62306	2.57346	2.88179	1.79176	2.21297	1.87692	2.45316	2.63062	3.04018	1.58045	1.96611	1.14513	3.56752	3.31159	3.83483
Retrotransposon	LTR	Gypsy	Gypsy	Gypsy-117_GM-I_edcotrep	2.404148408	2.392533652	2.689702914	2.311635019	2.436118986	2.043814364	1.476891178	1.707676527	2.187922559	2.552043355	1.609437912	2.036882362	4.846570072	5.268795864	4.904815414	2.182626317	2.441459685	2.600925167	1.919592574	2.041983674	1.874130234	2.191789836	2.338516749	2.629360467	1.349925976	1.609437912	1.686398954	2.772588722	2.442347035	2.272125886
Retrotransposon	LTR	Gypsy	Gypsy	Gypsy-118_SB-I_grasrep	1.87584	2.41591	1.74047	2.21664	2.43142	2.55793	1.9231	1.75175	1.17007	2.97893	3.51561	3.69304	4.82312	4.78258	5.17255	0	1.20397	0	2.24196	2.32584	2.28011	1.42404	0.693147	1.20397	2.63906	2.21557	2.75154	1.54045	1.98513	1.77777
Retrotransposon	LTR	Gypsy	Gypsy	Gypsy-119_GM-I_edcotrep	6.01849	5.83633	5.86655	3.65738	3.65137	3.39878	3.83435	3.80037	3.80969	3.90653	3.65163	3.57888	3.57387	3.49541	3.37773	3.36251	2.98299	3.19433	4.51503	4.31825	4.26986	3.21587	3.36926	3.2441	3.64578	3.60014	3.54691	2.94836	2.98813	2.83601
Retrotransposon	LTR	Gypsy	Gypsy	Gypsy-12_ALY-I_edcotrep	4.89997	4.72999	5.01175	3.76299	4.08766	3.98898	1.50024	2.47201	0.693147	0.693147	1.94591	0.693147	1.41528	1.63142	1.57554	2.40486	2.61683	2.41591	2.05839	1.94591	1.98591	3.22195	3.42937	2.8467	0	0	0	1.76766	1.79176	1.29928
Retrotransposon	LTR	Gypsy	Gypsy	Gypsy-12_BRa-I_edcotrep	3.88671	3.69511	3.76584	4.05912	4.21181	4.33073	2.82336	3.24147	3.19612	2.58022	3.04643	2.88382	6.59277	6.48957	6.6285	2.45101	2.71221	2.64696	3.83501	3.9035	3.79242	2.7102	2.93119	2.60586	3.92855	3.56825	3.73767	4.68878	4.2324	4.38129
Retrotransposon	LTR	Gypsy	Gypsy	Gypsy-12_DVir-I_invrep	6.042200436	6.51259341	5.965292528	3.95763288	3.057142469	3.564825862	3.084525812	3.543853682	2.875105824	2.240709689	3.295836866	4.056988776	2.90416508	2.991176914	3.15463166	1.386294361	1.098612289	1.098612289	0	1.098612289	1.609437912	1.945910149	1.098612289	2.079441542	1.945910149	1.887069649	1.609437912	3.789855371	4.238238536	4.272026205
Retrotransposon	LTR	Gypsy	Gypsy	Gypsy-12_MLP-I_fungi	0	1.38629	1.28093	0.693147	1.79176	0.693147	1.38629	0	2.30259	0	0.693147	0	4.50719	5.04986	4.82991	0	0	0.693147	1.09861	0	0.693147	1.33977	0.693147	2.30259	0	0	0	0	0	0
Retrotransposon	LTR	Gypsy	Gypsy	Gypsy-12_PAb-I_plnrep	3.57482	3.49878	3.8925	4.65406	4.53981	4.69434	5.08801	5.16676	5.05364	5.37453	5.38543	5.38717	4.8011	4.75453	4.74958	7.08204	7.04374	7.05342	5.09023	5.06194	5.10363	7.10828	7.10666	7.10367	3.37608	4.11027	3.93498	5.55357	5.51072	5.57333
Retrotransposon	LTR	Gypsy	Gypsy	Gypsy-12_PAb-LTR_plnrep	0.693147	0	0	0.693147	0	0	0	0	0	0	0	0	0	0	0	6.62714	6.54534	6.59412	0	0	0	6.6306	6.63139	6.61916	0	0.693147	0.693147	0	0	0
Retrotransposon	LTR	Gypsy	Gypsy	Gypsy-12_RC-I_edcotrep	6.09126	6.15136	6.21491	3.4761	3.59731	3.1128	4.01599	3.92267	4.00088	3.37513	3.53911	3.67759	3.78777	3.87722	3.75787	2.93427	2.79998	2.60269	4.29617	4.34096	4.28741	3.50063	3.59731	3.80037	4.36919	4.5451	4.62704	2.95116	2.93386	2.50709
Retrotransposon	LTR	Gypsy	Gypsy	Gypsy-12_TA-I_grasrep	3.31023	3.03574	3.17027	3.35125	3.46346	3.32195	3.86283	3.85486	3.75812	3.06954	2.8048	2.51707	2.0748	2.34728	2.43838	2.81065	2.69254	3.17805	2.93844	3.26339	3.10844	3.44601	2.898	3.34342	4.39366	4.55413	4.23911	5.33547	5.10345	5.11866
Retrotransposon	LTR	Gypsy	Gypsy	Gypsy-120_GM-I_edcotrep	3.172	2.67119	3.24519	5.08641	5.14935	4.89935	3.1984	3.19332	3.17067	3.11809	3.16172	3.35495	3.47998	3.67079	3.55228	3.29085	3.04452	3.10309	3.10906	3.38539	3.37043	3.34698	3.16814	2.9843	3.01261	3.11956	3.24177	3.6045	3.73698	3.77506
Retrotransposon	LTR	Gypsy	Gypsy	Gypsy-120_SB-I_grasrep	7.04818	6.61473	6.60597	4.88204	4.8287	4.98816	4.74037	4.71253	4.81412	2.90872	3.49926	3.80814	3.19079	2.98231	2.89037	0	0	0	0.693147	1.29098	1.54045	1.67398	1.79176	0	2.68558	3.41444	2.86996	4.92266	4.87241	4.86522
Retrotransposon	LTR	Gypsy	Gypsy	Gypsy-122_SBi-I_grasrep	3.53504	3.1004	3.92746	7.0934	7.09481	7.0924	3.58138	3.59376	3.95338	2.03688	2.56495	1.89712	1.25276	1.28093	1.27507	1.65456	1.77495	1.719	4.0143	3.96819	4.76856	1.50408	2.46243	2.41591	4.06536	4.10978	3.77768	3.4889	3.74557	3.36565
Retrotransposon	LTR	Gypsy	Gypsy	Gypsy-122B_SBi-I_grasrep	3.66268	3.85408	3.41225	5.58606	5.86867	5.5929	5.54157	5.63428	5.96101	2.63109	2.41789	3.31419	3.04628	3.23212	3.26094	2.55723	1.78059	1.95774	5.10146	5.14644	5.2323	2.09714	2.47092	2.30259	4.26268	4.42018	3.81404	2.58113	2.35974	2.46673
Retrotransposon	LTR	Gypsy	Gypsy	Gypsy-124_AA-LTR_invrep	3.449987546	2.944438979	2.970414466	3.96081317	4.40060302	4.248495242	1.871802177	2.351375257	1.945910149	0	1.609437912	1.609437912	5.278114659	5.315666005	5.556828062	2.708050201	2.564949357	2.833213344	2.014903021	1.609437912	1.504077397	4.766438334	4.875197323	4.859812404	0	0	0	5.760477818	5.576706392	5.760477818
Retrotransposon	LTR	Gypsy	Gypsy	Gypsy-126_GM-I_edcotrep	2.448536536	2.923161581	2.602689685	1.609437912	0	0	0	1.098612289	1.098612289	2.054123734	1.285196968	1.658228077	5.051604478	4.638604962	5.350672597	1.098612289	1.098612289	0	1.098612289	0	1.098612289	1.435084525	1.791759469	1.504077397	0	0	0	1.299283893	1.098612289	1.098612289
Retrotransposon	LTR	Gypsy	Gypsy	Gypsy-127_ZM-I_grasrep	2.44463	2.26375	2.13044	4.8216	5.31096	5.08451	4.6384	4.33841	4.59153	4.23266	4.90194	5.068	4.14496	4.05916	4.04788	3.28805	3.29493	3.10794	3.67159	3.68745	3.60933	3.46704	3.53889	3.43721	3.09622	3.09637	3.39376	3.83357	3.64215	3.65466
Retrotransposon	LTR	Gypsy	Gypsy	Gypsy-127_ZM-LTR_grasrep	2.43838	1.94591	2.5362	4.75594	4.85723	5.00143	1.63929	1.43282	2.06747	1.99243	1.69995	1.46228	1.35963	2.0149	1.87465	2.01275	1.335	2.05324	2.05645	2.45101	2.22462	1.45083	1.79176	1.85238	2.77259	2.63906	2.48491	2.64998	2.29385	2.79321
Retrotransposon	LTR	Gypsy	Gypsy	Gypsy-128_GM-I_edcotrep	5.7726	5.68843	5.76362	4.74775	4.78558	4.71501	3.15366	3.20398	3.04141	2.91112	2.61089	2.55902	4.73248	4.61573	4.40905	2.49182	2.4108	2.81278	3.56131	3.66118	3.76228	2.87854	3.02621	3.00831	4.92892	5.15652	5.2489	2.9861	2.99457	3.04838
Retrotransposon	LTR	Gypsy	Gypsy	Gypsy-129_GM-I_edcotrep	3.45789	3.15305	3.3673	1.81374	1.5235	1.54045	4.38203	4.06044	4.5242	5.25541	5.38388	5.70711	2.09597	1.92529	2.19722	2.55529	2.66723	2.61007	3.8712	4.01187	4.10319	2.77259	3.42318	3.30554	0.693147	0	0	0	0.693147	0
Retrotransposon	LTR	Gypsy	Gypsy	Gypsy-129_SBi-I_grasrep	2.87168	3.21314	2.75061	4.45501	4.3192	4.13028	2.15769	2.44463	1.79176	3.22714	3.80182	3.66791	4.33689	4.43872	4.46973	2.7462	2.48491	2.669	2.59239	2.64444	2.54704	3.04192	3.0498	3.3322	2.2025	2.40437	2.65926	4.97359	5.11253	5.04882
Retrotransposon	LTR	Gypsy	Gypsy	Gypsy-129_ZM-I_grasrep	1.28093	0.693147	0.693147	0.693147	0.693147	0.693147	1.43075	0.693147	2.07944	2.07944	0.693147	2.30259	1.79176	1.79176	1.97408	4.33763	4.54025	4.8941	2.07944	1.79176	2.07944	4.79933	5.37528	5.45288	0	0	0	1.51413	1.31219	1.69168
Retrotransposon	LTR	Gypsy	Gypsy	Gypsy-13_DAn-I_invrep	1.20397	0.693147	0	0	0.693147	0	1.79176	1.20397	1.29098	0.693147	0	0.693147	0.693147	0.693147	0.693147	2.07944	2.04307	0.693147	1.38629	2.07944	1.38629	0.693147	2.77259	2.87437	0	0	0.693147	5.3959	5.56288	5.1358
Retrotransposon	LTR	Gypsy	Gypsy	Gypsy-13_GM-I_edcotrep	5.80664	4.89784	5.23264	2.2736	2.43142	2.47148	2.22605	2.38906	2.41215	1.12393	1.59393	1.09861	4.92622	4.85654	4.87395	1.80789	2.32239	2.56802	3.14988	2.50553	2.53418	1.89712	2.3298	2.06546	0.693147	2.00882	2.3383	3.7208	3.50104	3.64185
Retrotransposon	LTR	Gypsy	Gypsy	Gypsy-13_LCh-I_vrtrep	2.564949357	1.098612289	3.044522438	1.568615918	3.384390263	2.564949357	2.251291799	2.228476659	1.280933845	2.549445171	2.397895273	2.477302814	3.57421748	3.107944264	4.17438727	4.976733742	3.895216565	3.955672359	2.862200881	1.860752118	2.228476659	5.379897354	4.768563733	4.997212274	2.708050201	3.496507561	3.295836866	1.791759469	1.481604541	1.76766143
Retrotransposon	LTR	Gypsy	Gypsy	Gypsy-13_PAb-I_plnrep	3.70883	3.72834	3.66929	6.02144	5.96646	5.98713	4.54862	4.65968	4.51565	4.24155	4.24479	4.32269	4.46481	4.43656	4.49046	7.11085	7.07488	7.08427	4.74884	4.84334	4.92265	7.34872	7.34985	7.33863	5.10352	4.93866	5.25422	5.39168	5.39132	5.41269
Retrotransposon	LTR	Gypsy	Gypsy	Gypsy-13_PAb-LTR_plnrep	0	0	0	0	0	0	1.098612289	1.526056303	1.945910149	1.098612289	0	1.098612289	6.568545499	6.619406318	6.625392368	8.761065999	8.532958267	8.567152196	1.526056303	1.098612289	1.098612289	8.556090775	8.556073462	8.549245968	0	0	0	5.490312813	5.396654778	5.455321115
Retrotransposon	LTR	Gypsy	Gypsy	Gypsy-13_PPa-I_plnrep	2.240709689	2.197224577	2.76361735	0	1.098612289	1.098612289	1.098612289	1.098612289	0	1.413693065	1.098612289	1.098612289	2.564949357	2.507377283	2.726917751	3.226121511	3.465735903	3.11149104	0	1.098612289	0	5.173887288	4.960513243	5.254365479	0	0	0	3.044522438	2.382627493	2.708050201
Retrotransposon	LTR	Gypsy	Gypsy	Gypsy-13_PPe-I_edcotrep	3.77056	4.13846	4.38106	5.95125	6.21353	5.87413	3.18486	3.1271	3.23212	1.90376	2.23136	2.09363	2.81975	2.83696	3.3492	2.86627	2.42548	1.94591	3.15795	3.37522	3.4114	2.87437	3.01694	3.14988	4.58445	4.67101	4.69237	4.31385	4.27493	5.06596
Retrotransposon	LTR	Gypsy	Gypsy	Gypsy-13_PPe-LTR_edcotrep	5.056245805	4.762173935	4.875197323	1.098612289	0	0	0	0	0	0	0	0	0	0	0	0	1.098612289	0	0	0	0	0	1.609437912	1.098612289	0	0	0	1.098612289	0	0
Retrotransposon	LTR	Gypsy	Gypsy	Gypsy-13_TC-I_edcotrep	4.77546	4.80893	4.56883	3.61392	3.5711	3.553	5.24913	5.15429	5.27811	3.90371	4.03637	4.04655	4.46633	4.36213	4.51614	1.92668	2.17914	2.08939	5.14166	4.78868	4.8855	1.5449	1.88454	1.69459	5.02725	4.93955	5.00452	4.56755	4.77068	4.99169
Retrotransposon	LTR	Gypsy	Gypsy	Gypsy-13-I_BF_tmplan	4.682973465	4.934473933	5.448890225	1.421386371	1.405341801	1.405341801	1.435084525	1.098612289	1.609437912	2.536581538	1.832581464	2.268683886	1.648658626	1.272966076	2.079441542	0	1.504077397	1.734601644	1.098612289	0	1.098612289	1.791759469	1.544197278	1.232143265	2.536581538	1.435084525	2.415913778	1.665006953	1.098612289	1.544197278
Retrotransposon	LTR	Gypsy	Gypsy	Gypsy-130_GM-I_edcotrep	3.41609	3.09719	3.3673	3.70093	3.5889	3.34673	5.34377	5.47004	5.57756	3.17314	3.47209	3.47873	4.03665	3.99069	4.06536	4.08317	4.1212	4.25549	5.12325	5.10393	5.11576	3.92073	3.81702	4.16907	1.42885	2.07944	1.38629	5.10675	5.31163	5.49082
Retrotransposon	LTR	Gypsy	Gypsy	Gypsy-131_DR-I_zebrep	4.87411	4.56435	4.71339	3.885	4.40672	3.59731	4.29242	4.21459	4.18459	3.69883	3.76892	6.11258	3.91867	5.04986	5.72452	3.17805	3.38777	3.14988	3.85721	3.59273	3.85721	3.65842	3.61631	3.34639	4.18965	3.43399	4.11087	4.22926	4.75359	4.38203
Retrotransposon	LTR	Gypsy	Gypsy	Gypsy-131_GM-I_edcotrep	3.85628	3.86912	4.02643	3.36483	3.58706	3.38877	2.8603	2.61956	2.5941	2.08567	3.09104	2.99851	5.69728	5.54677	5.52332	3.37194	3.14798	3.3339	2.70018	2.38876	2.31711	3.32902	3.48124	2.97251	0	1.29928	0.693147	3.56908	3.51665	3.95212
Retrotransposon	LTR	Gypsy	Gypsy	Gypsy-132_SBi-I_grasrep	3.93934	3.92825	3.86034	4.69211	4.34884	4.68657	5.27289	5.02431	5.33433	3.95734	3.44468	3.48062	3.6587	4.06862	3.56575	2.67296	2.71753	2.73302	4.47965	4.45144	4.58497	2.93386	3.42318	2.67771	3.88978	3.81577	3.94338	1.72924	1.90509	1.87584
Retrotransposon	LTR	Gypsy	Gypsy	Gypsy-133_SBi-I_grasrep	0	0.693147	0.693147	2.23734	2.58669	2.17277	0	0.693147	1.04145	1.89712	2.77259	3.23212	0.693147	0.693147	1.38629	0	0	0	0.693147	0	0.693147	0	0.693147	0	5.10854	4.92932	4.83628	0	0.693147	0
Retrotransposon	LTR	Gypsy	Gypsy	Gypsy-136_SBi-I_grasrep	5.20086	4.23666	3.97439	1.30221	2.10542	1.8894	3.31497	3.22069	3.35451	2.56495	1.53148	1.73827	2.33998	2.65926	2.50396	3.25296	2.86695	2.5539	4.58019	4.27095	4.32722	3.4761	3.03347	2.95027	2.79688	2.87199	2.70692	2.1564	2.06546	1.79176
Retrotransposon	LTR	Gypsy	Gypsy	Gypsy-14_ALY-I_edcotrep	2.738941449	2.941339444	2.909705866	1.330414248	1.724318964	1.4663363	1.586314618	1.704748092	1.488076733	3.675074604	4.043051268	3.826876797	2.212973247	1.917640002	1.810108426	5.140493281	4.601316771	4.931851793	1.32175584	1.370546004	1.287854288	4.781062788	5.396654778	5.015384001	1.504077397	1.098612289	2.197224577	3.190233523	2.971526667	2.88368277
Retrotransposon	LTR	Gypsy	Gypsy	Gypsy-14_DWil-I_invrep	2.76000994	2.378570659	2.944438979	1.265665091	1.098612289	1.408767439	1.815290432	2.140066163	2.268683886	5.831882477	2.120263136	2.662585501	1.704748092	1.945910149	2.356652735	1.098612289	1.481604541	1.4663363	1.945910149	1.945910149	2.120263136	1.312187543	1.516348465	2.09714147	2.415913778	3.100092289	2.505525937	1.504077397	1.223775432	1.386294361
Retrotransposon	LTR	Gypsy	Gypsy	Gypsy-14_FV-I_edcotrep	3.03975	2.94444	2.50553	5.47356	5.25807	5.43185	1.75402	2.55793	2.3383	3.07269	1.28093	2.33075	0.693147	2.12389	1.97408	1.50408	2.34181	1.97408	1.79176	1.92991	1.73039	1.28785	1.8563	1.72277	4.61841	4.59512	4.51695	2.30259	2.26176	1.59109
Retrotransposon	LTR	Gypsy	Gypsy	Gypsy-14_GA-I_vrtrep	0	1.38629	0	5.66873	5.65716	5.55554	1.79176	1.38629	0.693147	0	0	0	0	0	0	0	0	0	0	1.79176	1.38629	0	0	0	5.19296	4.89485	5.0626	0	0	0
Retrotransposon	LTR	Gypsy	Gypsy	Gypsy-14_PAb-I_plnrep	2.94516	3.03495	2.79902	3.24319	3.23146	3.2441	4.3761	4.43082	4.40944	4.09952	4.24635	4.14053	3.81381	3.80684	3.6382	6.03918	6.00445	6.00843	4.40069	4.46033	4.41725	6.00002	5.98779	5.97683	4.06044	3.04298	4.16821	5.84448	5.83529	5.81167
Retrotransposon	LTR	Gypsy	Gypsy	Gypsy-14_PAb-LTR_plnrep	0	0	0	0	0	0	0	0	0	0	0	0	2.74727	2.07944	1.38629	6.10785	6.11317	6.08528	0.693147	1.38629	0.693147	6.21317	6.18784	6.20486	0	0	0	5.40668	5.41528	5.35165
Retrotransposon	LTR	Gypsy	Gypsy	Gypsy-14_PBa-I_invrep	2.468099531	2.538976503	2.616833631	4.927253685	5.161420316	5.335714302	2.217225442	2.005333377	2.102608601	2.128231706	1.815290432	1.945910149	2.065455441	2.08374228	2.236139688	2.014903021	2.602689685	2.564949357	2.09714147	1.852384091	1.945910149	1.791759469	1.884540696	2.187922559	2.294863357	2.047692843	2.297811719	1.609437912	1.849216727	2.147709817
Retrotransposon	LTR	Gypsy	Gypsy	Gypsy-14_PPe-I_edcotrep	2.83076	3.00017	2.61885	2.60605	2.60814	2.87057	5.17427	5.29674	5.30971	2.55143	2.9522	2.96896	2.61868	2.55612	2.58164	2.17718	1.88707	2.12217	5.17079	5.37496	5.33586	1.96272	1.87728	1.73827	0.693147	0.693147	1.06784	3.23356	3.03803	3.38133
Retrotransposon	LTR	Gypsy	Gypsy	Gypsy-14_SMo-I_plnrep	3.03145	1.63761	2.49994	5.06183	5.25046	5.45959	2.28186	2.18422	2.59558	1.27507	1.9394	2.28708	2.31946	2.10959	1.91581	2.32779	2.46964	2.26401	2.54048	2.78876	2.50901	2.81341	2.60022	2.72836	4.99721	4.57196	4.44134	2.1463	2.36585	2.36264
Retrotransposon	LTR	Gypsy	Gypsy	Gypsy-14_ST-I_edcotrep	3.35675	3.49651	3.91488	2.80768	2.24852	2.54771	1.88273	1.95082	1.88413	2.66723	2.15948	2.24724	4.51086	4.08766	4.2403	4.96783	4.47596	5.0026	2.157	1.9113	2.24071	5.79775	5.05242	4.69101	2.86496	2.80102	2.46273	1.1499	2.19722	2.62104
Retrotransposon	LTR	Gypsy	Gypsy	Gypsy-142_ZM-I_grasrep	1.098612289	1.493926046	1.421386371	1.098612289	1.386294361	1.098612289	3.727412431	3.743604354	3.633818545	2.745435898	3.200939934	2.842219723	5.394926702	5.266826699	5.68168682	1.504077397	0	1.098612289	2.65089414	2.722754889	2.965273066	1.098612289	1.098612289	1.386294361	1.098612289	1.609437912	0	2.423536438	1.658228077	1.791759469
Retrotransposon	LTR	Gypsy	Gypsy	Gypsy-144_ZM-I_grasrep	0.965081	0.693147	0.980831	1.12847	0.693147	1.38629	0.693147	0	0.693147	1.29928	1.55335	0.693147	0	0	0	1.79176	1.7346	0.693147	1.32567	1.4604	1.77406	0	0	0	0.693147	0	0.693147	4.84294	5.00968	5.27181
Retrotransposon	LTR	Gypsy	Gypsy	Gypsy-145_ZM-I_grasrep	1.9226	2.32807	2.7586	3.58967	3.37043	3.76584	3.17805	3.29053	3.87714	5.66296	6.00711	5.57354	4.66469	4.60116	4.62759	2.70062	2.41789	2.72458	4.10961	3.75941	4.00993	2.79576	3.03655	2.28578	3.51651	3.68888	3.52636	2.25129	2.15176	2.21297
Retrotransposon	LTR	Gypsy	Gypsy	Gypsy-15_ALY-I_edcotrep	1.93426	2.07944	1.79176	2.48491	2.34607	2.541	5.29357	4.39372	4.90897	2.98315	3.07639	3.31971	2.07206	1.95761	2.14316	2.11021	2.1848	2.26311	4.72177	4.94937	4.56973	2.13208	2.00653	2.38381	0.693147	0.693147	0.693147	2.19011	2.70501	2.65721
Retrotransposon	LTR	Gypsy	Gypsy	Gypsy-15_BRa-I_edcotrep	5.569038919	5.313860937	5.206306239	1.35812377	1.098612289	1.686398954	2.036882362	1.472472057	1.365241803	1.76766143	2.48490665	1.960835355	1.098612289	1.479625311	1.966113256	2.266818009	2.756840365	2.362891547	2.197224577	1.098612289	1.360976553	3.150901006	3.293445119	3.042014534	2.48490665	3.002851869	2.63905733	1.098612289	1.098612289	1.098612289
Retrotransposon	LTR	Gypsy	Gypsy	Gypsy-15_FV-I_edcotrep	1.88995	2.68558	3.2912	1.73114	1.67398	1.47331	3.13277	3.17496	3.42811	2.81181	2.45414	2.53687	2.23359	1.79176	2.60269	2.07944	2.56495	1.12847	2.82477	2.8792	2.68558	2.00882	1.73114	2.62104	5.34884	5.28716	5.26041	1.35455	1.47727	1.60944
Retrotransposon	LTR	Gypsy	Gypsy	Gypsy-15_PAb-I_plnrep	3.89166	3.96755	3.59705	4.98112	5.1522	5.1991	5.22765	5.25406	5.24585	4.20931	4.6962	4.66774	6.06266	6.02742	6.05065	8.4548	8.41164	8.42993	5.55957	5.57115	5.62151	8.39663	8.39975	8.39849	2.44082	2.4248	2.96042	4.70932	4.82419	4.72174
Retrotransposon	LTR	Gypsy	Gypsy	Gypsy-15_PAb-LTR_plnrep	0	0	0	0	0	0	0	0	0	0	0	0	0	0	0	7.2036	7.20581	7.21505	0	0	0	6.90759	6.93636	6.89322	0	0	0	0	0	0
Retrotransposon	LTR	Gypsy	Gypsy	Gypsy-15_PPe-I_edcotrep	3.421	2.98946	2.93119	1.61631	1.59109	1.64223	5.16841	5.22091	4.77002	1.54045	2.29141	1.81993	3.58352	2.7264	2.81248	0.693147	0.693147	0.693147	5.37183	5.25255	5.1358	1.09861	1.38629	0.693147	2.07944	0.693147	1.09861	2.23359	2.33998	2.28186
Retrotransposon	LTR	Gypsy	Gypsy	Gypsy-15_SMo-I_plnrep	2.58444	2.67265	2.54632	3.1916	3.45175	3.08543	3.68396	3.76252	3.74604	4.8724	4.69751	4.75676	4.66029	4.5326	4.81983	2.3979	2.56985	2.5379	2.8792	2.61612	2.55429	2.41523	2.48143	2.50367	5.39784	5.34847	5.27416	3.1482	3.03796	3.28004
Retrotransposon	LTR	Gypsy	Gypsy	Gypsy-150-LTRb_DR_zebrep	3.37221	3.55942	3.09104	3.06027	2.59026	2.93689	3.38627	3.30112	3.02852	4.43379	5.7189	5.59965	4.05178	4.16408	4.54683	2.07944	1.28093	1.20397	2.43612	2.65926	2.85263	3.62244	3.39376	3.88303	1.99243	2.07944	2.07944	3.1209	3.32023	2.61496
Retrotransposon	LTR	Gypsy	Gypsy	Gypsy-155_AA-I_invrep	0.693147	0.693147	0.693147	0	1.29928	0.693147	0	0	1.09861	0.693147	0	0.693147	1.38629	0.693147	0	0.693147	1.38629	1.23214	0	0	0.693147	4.15261	4.35671	5.18178	0	0	0	0.693147	0	0.693147
Retrotransposon	LTR	Gypsy	Gypsy	Gypsy-16_IS-LTR_invrep	0	0	0	0	0	0	0	0	0	4.189654742	4.976733742	5.105945474	0	0	0	0	0	0	0	0	0	0	0	0	0	0	0	0	0	0
Retrotransposon	LTR	Gypsy	Gypsy	Gypsy-16_Mad-I_dcotrep	1.92668	1.84273	1.79176	2.60487	2.9866	2.57588	2.49129	3.05907	2.11223	2.38381	1.45001	1.8777	2.57237	2.64886	2.47871	2.66136	2.6288	3.49314	2.16151	2.28542	2.1366	2.17475	2.28011	2.31428	5.0996	4.82991	4.99694	1.45775	2.54553	1.7492
Retrotransposon	LTR	Gypsy	Gypsy	Gypsy-16_PAb-I_plnrep	3.71127	3.60791	3.87424	5.11632	5.06512	4.99151	4.3238	4.2904	4.32852	3.21125	3.41762	3.23666	4.49671	4.53743	4.56327	5.87872	5.85461	5.85493	4.27237	4.2087	4.17774	5.84171	5.85812	5.8521	4.25845	4.11868	4.27821	4.47358	4.45918	4.55211
Retrotransposon	LTR	Gypsy	Gypsy	Gypsy-16_PAb-LTR_plnrep	0	0	0	0	0	0	0	0	0	0	0	0	2.05127	1.65823	2.59026	4.10677	4.15301	3.93427	0	0	0	5.06969	4.98532	5.05625	0	0	0	0	0	0
Retrotransposon	LTR	Gypsy	Gypsy	Gypsy-16_PBa-I_invrep	2.03499	2.32456	2.39088	0.693147	0	0.693147	4.66971	4.49822	4.31125	4.1972	3.75732	4.35671	4.04709	4.06044	3.81404	3.51367	4.2237	3.99426	3.8889	2.90336	2.8834	4.1795	3.38047	4.09434	5.14361	5.21326	5.38907	2.85263	2.67906	3.07578
Retrotransposon	LTR	Gypsy	Gypsy	Gypsy-16_RC-I_edcotrep	4.97602	5.09135	4.97868	4.14359	4.25445	4.09996	3.85824	4.00943	3.95404	3.25347	3.03886	3.52183	4.25797	4.05605	3.81527	3.50941	3.52046	3.4442	4.0238	3.71163	3.47779	3.42888	3.30462	3.36784	4.86946	4.99981	4.98934	3.39341	3.66213	3.38197
Retrotransposon	LTR	Gypsy	Gypsy	Gypsy-16_SB-I_grasrep	1.8444	2.3263	2.2796	4.55326	4.20523	3.9728	3.27504	3.32834	3.33123	3.49733	3.60814	3.70225	5.11738	5.20696	5.02817	2.44906	2.29757	2.38519	3.24705	3.33849	3.41068	2.40948	2.51377	2.43993	2.66869	2.66869	2.8679	4.51915	4.38606	4.45343
Retrotransposon	LTR	Gypsy	Gypsy	Gypsy-16_ST-I_edcotrep	4.98494	4.65279	4.57338	3.27158	3.2581	3.03093	3.70366	3.55783	3.58478	2.01638	2.17475	2.3097	5.64044	5.73192	5.74445	2.72184	2.58085	2.69687	3.35061	3.18929	3.00815	3.01771	3.03445	3.06027	2.70805	1.79176	0.693147	2.36	1.90868	1.90478
Retrotransposon	LTR	Gypsy	Gypsy	Gypsy-16_TC-I_edcotrep	4.70428	4.49981	4.80902	6.02889	5.90474	5.8291	3.55436	3.56613	3.40305	3.30235	3.27217	3.26449	3.18989	2.98926	3.36236	2.64696	2.57799	2.52127	3.7329	3.9858	3.93183	2.53276	2.7966	2.78089	6.59998	6.39113	6.68495	3.07924	2.82138	2.50984
Retrotransposon	LTR	Gypsy	Gypsy	Gypsy-163_ZM-I_grasrep	1.098612289	1.098612289	0	2.833213344	3.169685581	3.218875825	1.405341801	1.665006953	1.098612289	2.84912722	4.934473933	3.761200116	3.287573186	2.308449862	2.48886547	5.233480134	3.981237452	4.359908829	1.563976003	1.299283893	1.265665091	4.243722442	4.638256739	4.815139335	2.944438979	3.295836866	2.708050201	1.609437912	1.791759469	1.098612289
Retrotransposon	LTR	Gypsy	Gypsy	Gypsy-168_ZM-I_grasrep	3.75528	3.47739	3.47988	3.88476	3.88009	3.72994	2.66954	2.73835	2.80087	2.8242	2.8679	2.59449	2.72761	2.41888	2.58927	2.60269	2.47524	2.409	2.60417	2.87544	3.02682	2.76722	2.66126	2.68558	4.50424	4.56619	4.2676	5.25167	5.09041	5.43392
Retrotransposon	LTR	Gypsy	Gypsy	Gypsy-17_BD-I_grasrep	1.349925976	1.098612289	1.098612289	1.686398954	1.540445755	1.386294361	1.609437912	1.098612289	1.232143265	5.166213526	4.837162472	4.268698349	1.754855138	1.712977772	1.405341801	1.832581464	1.945910149	1.697730801	1.493926046	1.262240769	1.098612289	2.614962217	2.490839018	2.187072104	0	1.098612289	0	2.126399075	2.011723304	2.09714147
Retrotransposon	LTR	Gypsy	Gypsy	Gypsy-17_Mad-I_dcotrep	1.71172	1.52606	2.18864	0.693147	0.944462	1.60944	4.77407	4.63119	4.83779	1.1827	0.693147	0.693147	2.26962	2.46316	2.25129	2.3979	0.693147	2.73003	5.19518	4.92466	5.2584	1.8506	1.12847	0.693147	0	0	0	1.31219	2.13351	1.56862
Retrotransposon	LTR	Gypsy	Gypsy	Gypsy-17_OD-I_invrep	0	0	0	1.098612289	1.098612289	1.098612289	5.105945474	4.96284463	4.262679877	0	0	1.386294361	0	0	0	0	0	0	0	1.098612289	1.098612289	0	0	0	0	0	0	0	0	0
Retrotransposon	LTR	Gypsy	Gypsy	Gypsy-17_PAb-I_plnrep	2.70728	2.7072	2.53025	4.93746	4.91969	4.83011	5.53051	5.50852	5.54097	5.9939	6.06325	6.06178	4.29264	4.36676	4.27689	7.1213	7.07942	7.09784	5.49298	5.49681	5.48138	7.16262	7.17122	7.17674	1.60944	1.22867	0.972732	5.57444	5.52272	5.52497
Retrotransposon	LTR	Gypsy	Gypsy	Gypsy-17_PAb-LTR_plnrep	0.693147	1.60944	0.693147	1.54045	0.693147	1.04982	1.79176	0.788457	1.60944	1.32176	1.76766	1.83258	1.92529	2.03688	2.11021	6.70875	6.68039	6.69066	1.0116	0	1.29928	7.28764	7.28674	7.29508	2.00533	1.70475	2.2736	1.20397	0	0
Retrotransposon	LTR	Gypsy	Gypsy	Gypsy-17_SB-I_grasrep	1.01857	2.80336	1.38629	1.62746	2.22162	2.29141	2.4681	2.39088	2.84781	4.63796	5.64241	5.68131	4.50632	4.48449	4.75093	1.07614	1.36098	1.60944	2.70359	2.67251	2.80672	2.06686	1.8563	1.8506	2.21297	1.69168	1.38629	3.57954	3.8712	3.94828
Retrotransposon	LTR	Gypsy	Gypsy	Gypsy-17_ST-I_edcotrep	1.47591	1.23214	1.4023	5.94165	5.66667	5.46365	4.42634	4.43298	4.43902	2.10843	2.54679	2.62916	2.7099	2.7874	2.79293	2.47625	2.87219	2.2705	4.83506	4.78663	4.98361	2.75061	2.44235	2.62269	0	0	0.693147	3.44999	3.6663	3.58654
Retrotransposon	LTR	Gypsy	Gypsy	Gypsy-178_DR-I_zebrep	1.098612289	0	1.098612289	1.504077397	1.098612289	1.098612289	0	1.609437912	1.098612289	1.098612289	1.098612289	1.098612289	1.4663363	1.776491843	1.435084525	1.945910149	1.098612289	1.098612289	0	0	0	2.197224577	2.079441542	2.277267285	5.187385806	5.424950017	4.672828834	1.098612289	0	0
Retrotransposon	LTR	Gypsy	Gypsy	Gypsy-18_ALY-I_edcotrep	5.18908	4.87583	4.62301	5.79816	5.80692	5.79746	4.43729	5.40118	4.69745	3.45582	3.61826	4.38757	3.12822	3.95763	4.4961	3.44316	4.23411	3.57555	4.04305	4.04464	4.12444	3.28964	2.97893	2.81626	4.84456	4.95018	4.99222	3.92426	3.96858	3.82241
Retrotransposon	LTR	Gypsy	Gypsy	Gypsy-18_FV-I_edcotrep	3.50083	3.60078	3.66205	2.78501	2.76157	2.81868	3.84405	3.95771	4.01258	3.43894	3.49339	3.56072	4.3057	4.32306	4.16135	3.56076	3.57896	3.42485	3.90053	3.93734	4.00761	3.68152	3.57493	3.89402	5.24215	5.09079	5.1104	4.25333	3.93626	4.08996
Retrotransposon	LTR	Gypsy	Gypsy	Gypsy-18_PAb-I_plnrep	3.33574	3.13485	3.20931	3.7653	3.79559	3.5471	3.44156	3.41191	3.40996	3.20898	3.22759	3.20741	4.67344	4.66482	4.64375	8.8371	8.79222	8.81696	3.64427	3.72772	3.80156	8.71962	8.7162	8.7077	6.19399	5.92959	5.64036	3.48431	3.49185	3.61267
Retrotransposon	LTR	Gypsy	Gypsy	Gypsy-18_PAb-LTR_plnrep	0	1.098612289	1.098612289	0	0	0	0	0	0	0	0	0	1.098612289	1.098612289	0	7.694160535	7.494986234	7.459672941	0	0	0	7.152715115	7.16071391	7.120290763	0	1.098612289	0	1.098612289	1.098612289	1.098612289
Retrotransposon	LTR	Gypsy	Gypsy	Gypsy-18_SB-I_grasrep	1.91482	2.19192	2.10261	4.09301	3.95124	3.87693	1.60944	1.55181	1.77196	1.66771	2.30259	2.0149	2.3482	2.07944	2.73914	1.07881	1.70475	0.693147	1.70907	1.90298	2.15948	1.71008	1.04145	1.96166	5.38056	5.72009	5.8312	3.14631	2.80569	2.65676
Retrotransposon	LTR	Gypsy	Gypsy	Gypsy-18_SMo-I_plnrep	3.50348	3.65763	3.55995	5.67084	5.89112	5.58871	2.66794	2.83452	2.99876	2.86307	3.93908	3.7964	2.87057	2.96646	2.89037	2.24374	2.61412	2.3477	2.36543	2.76714	2.10476	2.33336	2.25533	2.31428	2.93443	3.07885	2.77661	4.1972	3.78059	3.96609
Retrotransposon	LTR	Gypsy	Gypsy	Gypsy-185_ZM-I_grasrep	1.945910149	2.197224577	2.48490665	0	0	0	0	1.098612289	0	1.098612289	0	1.098612289	5.396351107	5.089649781	5.281171208	0	0	0	0	0	1.098612289	1.435084525	0	0	1.098612289	1.098612289	1.098612289	1.791759469	0	0
Retrotransposon	LTR	Gypsy	Gypsy	Gypsy-19_ALY-I_edcotrep	1.75175	1.79176	1.69995	3.06751	2.91291	2.70316	2.38298	2.60269	2.92276	2.77259	3.28887	3.16641	1.68303	1.60944	1.69562	1.24909	1.96611	1.76978	3.05444	2.71571	2.72291	1.7182	1.31079	1.5329	5.26957	4.67904	5.16479	2.19067	2.01882	1.97897
Retrotransposon	LTR	Gypsy	Gypsy	Gypsy-19_ATr-LTR_plnrep	2.397895273	2.575881689	2.268683886	2.294863357	1.900959106	2.219203484	2.367123927	2.172223528	1.866661293	2.501435952	1.098612289	1.916922612	1.098612289	1.098612289	1.098612289	1.098612289	1.098612289	1.098612289	0	0	1.609437912	1.791759469	2.197224577	1.669156712	6.414551802	6.431599967	6.6505662	1.550598322	1.609437912	1.533929576
Retrotransposon	LTR	Gypsy	Gypsy	Gypsy-19_PAb-I_plnrep	0	0	0	0	0	0	0	0	0	0	0	0	0	0	0	6.11805	6.02284	6.0764	0	1.38629	0	6.08531	6.06204	6.07888	0.693147	0	0	0	0	0
Retrotransposon	LTR	Gypsy	Gypsy	Gypsy-19_PAb-LTR_plnrep	0	0	0	0	0	0	0	0	0	1.098612289	0	0	0	0	0	5.869246064	5.60364533	5.58879428	0	0	0	5.37752588	5.321472212	5.337797661	0	0	1.098612289	0	0	0
Retrotransposon	LTR	Gypsy	Gypsy	Gypsy-19_PSo-I_plnrep	1.673975809	1.734601644	1.824549292	0	1.504077397	0	1.098612289	1.098612289	0	0	0	0	1.098612289	1.098612289	1.098612289	2.151762203	2.240709689	2.00148	0	0	0	1.871802177	1.609437912	1.609437912	6.047372179	5.966146739	5.9140434	1.098612289	0	0
Retrotransposon	LTR	Gypsy	Gypsy	Gypsy-19_RC-I_edcotrep	2.8174	2.17004	2.81784	3.97489	4.19887	4.24152	5.05132	5.15114	5.1482	3.39163	1.69051	2.81341	4.12848	3.72268	3.7152	1.82351	1.75604	2.06463	4.62396	4.55388	4.9662	1.96869	1.34993	1.88031	4.2306	4.11733	4.36008	1.96478	2.03432	1.93102
Retrotransposon	LTR	Gypsy	Gypsy	Gypsy-19_SB-I_grasrep	3.76692	3.76293	3.77001	3.57663	3.77775	3.47589	3.47408	3.27862	3.46276	3.26081	3.32057	3.27275	5.01591	4.98124	4.9795	3.23278	3.20449	3.22202	3.15143	3.23714	3.26628	3.37847	3.24387	3.42292	2.74608	2.42997	2.02073	5.40218	5.47244	5.39753
Retrotransposon	LTR	Gypsy	Gypsy	Gypsy-19_SMo-I_plnrep	2.57192	2.96527	2.74274	4.86591	5.00797	4.76525	2.56495	2.33075	2.85465	1.81304	2.48491	1.7595	3.97781	3.79023	3.8699	2.14316	1.80555	2.09251	2.38482	2.34974	2.0178	1.58045	1.98281	2.35138	5.18937	5.51658	5.36274	3.60992	3.75887	3.53125
Retrotransposon	LTR	Gypsy	Gypsy	Gypsy-191_ZM-I_grasrep	4.67271	4.84129	4.71492	4.88392	5.05247	4.76805	4.045	3.96699	4.13956	2.94673	2.76535	2.90993	2.23084	2.37878	2.08803	1.99606	1.91037	1.88892	3.85386	3.91018	3.84348	2.25712	2.55173	2.21664	3.564	3.92139	3.65021	3.64098	3.78678	3.79134
Retrotransposon	LTR	Gypsy	Gypsy	Gypsy-195_ZM-I_grasrep	0	1.63761	0.693147	2.59026	2.63906	3.23212	2.77259	2.31912	2.2736	4.51743	5.0876	5.21276	0	0	0	0	0.693147	0	2.87437	1.99243	2.12026	0	0	0.693147	0	0	0	0	0	0
Retrotransposon	LTR	Gypsy	Gypsy	Gypsy-196_DR-I_zebrep	4.313671506	4.276666119	5.303304908	1.609437912	1.299283893	1.098612289	3.068052935	2.856470206	3.091042453	2.512302921	2.732001075	2.58021683	0	1.32175584	1.098612289	0	0	0	2.772588722	2.76361735	2.351375257	1.098612289	1.098612289	0	0	0	0	1.098612289	1.609437912	1.098612289
Retrotransposon	LTR	Gypsy	Gypsy	Gypsy-198_ZM-I_grasrep	0.693147	0.693147	1.09861	5.27811	5.771	5.72078	1.81708	1.26369	2.07944	1.7346	1.7346	1.38629	1.28093	0.693147	1.38629	0.693147	0	1.38629	4.97443	4.88927	4.82259	1.38629	0	0	0	0	0.693147	0	0.693147	0.693147
Retrotransposon	LTR	Gypsy	Gypsy	Gypsy-2_ALY-I_edcotrep	3.66777	3.47774	3.70981	3.58352	3.49298	3.35574	4.10759	4.1242	3.97248	4.85155	4.30278	4.57127	3.50355	3.90854	3.80902	4.62661	4.43082	4.27939	3.64785	3.57989	3.7542	4.75589	5.21756	5.17597	4.09701	3.61242	3.58967	3.28767	3.05636	3.15427
Retrotransposon	LTR	Gypsy	Gypsy	Gypsy-2_BM-I_invrep	5.66043	5.39363	5.39514	3.51155	4.50929	3.75732	4.29274	5.16397	4.62777	4.29914	3.43399	6.12249	3.49217	4.45435	5.17534	4.38914	3.81671	4.39136	4.76856	4.53439	4.53942	3.15396	3.04884	2.57192	4.99043	4.68213	4.86333	3.47703	4.26619	4.49237
Retrotransposon	LTR	Gypsy	Gypsy	Gypsy-2_BRa-I_edcotrep	3.23642	3.30722	3.17805	2.39356	2.52127	1.93102	3.24427	2.83577	3.06617	2.07944	1.81529	2.22562	3.2581	2.93964	3.43011	3.12181	3.02668	3.27043	3.22408	2.92002	3.24147	3.06805	3.23521	3.42515	5.26973	4.80463	4.8925	1.69645	1.63974	1.64334
Retrotransposon	LTR	Gypsy	Gypsy	Gypsy-2_DWil-I_invrep	4.88028	4.65396	4.71253	3.63759	3.98898	3.55535	3.51651	3.99514	3.85721	3.66868	3.36038	5.55425	4.50719	4.83097	5.21855	4.07511	3.75342	3.86283	3.44468	3.46574	3.93834	4.16408	4.30407	4.25797	3.97656	3.88077	4.1325	3.58352	3.86423	3.85721
Retrotransposon	LTR	Gypsy	Gypsy	Gypsy-2_Mad-I_edcotrep	3.0625	2.99957	3.23273	3.67337	4.06044	3.94019	4.04151	4.15104	4.18909	3.52535	3.69077	3.3957	5.80943	5.8644	5.97096	3.05714	2.33011	2.887	3.94428	4.03699	4.18381	2.97298	3.06984	2.78169	3.69173	3.627	3.95124	5.63959	5.55361	5.69171
Retrotransposon	LTR	Gypsy	Gypsy	Gypsy-2_NN-I_edcotrep	1.550598322	2.197224577	1.791759469	3.415382956	3.417726684	2.297308195	1.945910149	1.686398954	1.455286233	2.236834104	2.25878262	2.379546134	2.344549155	2.174751721	2.31024766	1.098612289	1.098612289	1.098612289	2.63905733	1.815290432	1.704748092	1.791759469	1.098612289	1.098612289	5.635503634	4.674267052	4.83786795	1.098612289	1.609437912	1.386294361
Retrotransposon	LTR	Gypsy	Gypsy	Gypsy-2_PAb-I_plnrep	4.07335	3.67788	4.2916	4.65127	4.72851	4.67697	4.7891	4.85447	4.72554	4.2638	4.18555	4.33733	4.65141	4.61631	4.61177	7.16299	7.15187	7.16016	4.74772	4.72493	4.81857	7.24379	7.24917	7.24126	3.59027	3.241	3.2326	4.73956	4.69646	4.80033
Retrotransposon	LTR	Gypsy	Gypsy	Gypsy-2_PAb-LTR_plnrep	0	0	0	0	0	0	0	0	0	0	0	0	0	0	0	7.32896	7.30209	7.27882	0	0	0	7.03647	7.02984	7.0283	0	0	0	0	0	0
Retrotransposon	LTR	Gypsy	Gypsy	Gypsy-2_PBa-I_invrep	1.07614	1.46634	0.693147	3.3673	3.01226	2.92674	2.11453	1.79176	1.981	1.74297	2.24374	1.79176	2.48491	3.09104	2.87795	1.96944	1.51413	1.51635	1.89712	2.50553	2.24374	1.92181	2.33537	1.79176	5.93207	5.57195	5.7314	2.31785	2.85263	2.32891
Retrotransposon	LTR	Gypsy	Gypsy	Gypsy-2_Pru-I_edcotrep	3.31621	2.91864	2.85862	1.54045	1.44692	1.7492	3.92746	3.88088	3.57577	3.96783	3.42937	3.03427	2.83321	2.64553	2.71095	1.24521	1.79176	1.91692	4.05526	3.61185	3.67207	0.693147	2.19722	1.38629	5.56234	5.50193	5.40862	1.93152	1.64866	1.58412
Retrotransposon	LTR	Gypsy	Gypsy	Gypsy-2_PX-I_edcotrep	2.045993336	3.449987546	2.882401188	2.551482157	2.833213344	2.728884975	0	1.098612289	1.280933845	2.27923765	2.780370863	2.48490665	2.433613355	2.954910279	2.726917751	3.054001182	3.841600541	3.044522438	1.098612289	1.098612289	1.609437912	4.97397131	5.093750201	5.148656592	1.098612289	1.386294361	1.098612289	3.157000421	3.198673118	1.76766143
Retrotransposon	LTR	Gypsy	Gypsy	Gypsy-2_RC-I_edcotrep	3.04099	2.91021	2.98631	3.18635	3.15676	3.14255	4.56478	4.58047	4.70853	3.20359	3.39986	3.51118	4.97698	5.02464	5.0231	4.32059	4.30931	4.07911	4.83849	4.59521	4.54818	4.2575	4.23464	4.29242	3.94083	3.94901	3.69927	5.55834	5.48351	5.4531
Retrotransposon	LTR	Gypsy	Gypsy	Gypsy-2_TC-I_edcotrep	2.53898	2.84491	2.76393	4.53825	4.66672	4.78582	2.81811	2.78389	2.753	2.26003	2.69881	2.55748	3.82319	3.92127	3.84249	2.34117	2.53336	2.46281	3.03126	2.63641	2.65926	2.46306	2.39624	2.53783	2.20949	1.75897	2.23084	5.35059	5.18119	5.14043
Retrotransposon	LTR	Gypsy	Gypsy	Gypsy-2-I_DP_invrep	1.609437912	1.791759469	1.791759469	6.483871585	5.807391457	6.478509642	1.098612289	1.609437912	2.197224577	2.564949357	2.649212731	2.890371758	2.197224577	2.708050201	2.014903021	2.327277706	1.609437912	2.48490665	2.944438979	2.288196066	2.772588722	3.218875825	3.17805383	2.708050201	0	0	0	0	1.098612289	0
Retrotransposon	LTR	Gypsy	Gypsy	Gypsy-20_ALY-I_edcotrep	5.81869	5.61885	5.8693	2.71671	2.99373	2.67358	3.06846	3.06674	3.05862	1.9404	2.20573	1.95539	2.85597	2.9979	2.51071	2.62104	2.65532	2.44892	2.3801	2.50984	2.31521	2.82838	2.98496	2.791	1.44692	1.57735	1.19214	1.77156	1.8563	1.76978
Retrotransposon	LTR	Gypsy	Gypsy	Gypsy-20_BRa-I_edcotrep	5.81981	5.53113	5.61417	2.28011	2.84491	3.10696	2.75154	2.71316	3.64632	1.79176	1.79176	0.693147	3.52636	2.3896	3.04818	0	0.693147	0.693147	4.01938	3.75118	4.07754	0	0	0	3.63759	3.93333	3.45249	2.63906	0.693147	1.76359
Retrotransposon	LTR	Gypsy	Gypsy	Gypsy-20_CT-I_invrep	0	0	0	0	0	0	0	0	0	2.197224577	2.442347035	2.25878262	5.068904202	5.173320876	5.099866428	0	0	0	0	0	0	0	0	0	1.098612289	0	0	0	1.098612289	0
Retrotransposon	LTR	Gypsy	Gypsy	Gypsy-20_FV-I_edcotrep	3.98826	3.69621	3.81246	4.1631	4.15607	4.2601	4.99345	5.05435	5.08167	4.18965	4.43395	4.44956	4.39824	4.30836	4.31893	4.30057	4.17512	4.42379	4.98285	4.94073	5.03794	4.51047	4.37001	4.42388	3.7903	4.05333	3.91494	4.17493	3.93728	3.97847
Retrotransposon	LTR	Gypsy	Gypsy	Gypsy-20_GA-I_vrtrep	4.97443	4.78415	4.88884	3.77506	3.63231	3.88773	3.89589	3.96651	3.24259	4.06044	3.59457	5.9162	3.24259	3.93183	4.93878	3.34639	2.5177	2.68558	3.28342	3.51453	3.68888	2.8679	2.48491	3.17805	4.3464	3.99636	4.12066	4.36691	4.49536	4.36691
Retrotransposon	LTR	Gypsy	Gypsy	Gypsy-20_GM-I_edcotrep	3.54303	4.16777	3.15506	2.4108	2.17742	2.07944	3.16279	2.80869	3.20704	2.85811	2.91777	2.63906	5.80228	5.81512	6.02862	0.693147	1.38629	1.17272	3.37773	3.54578	3.5139	0.693147	0.693147	0.693147	0	0	0	1.08261	1.19098	1.46634
Retrotransposon	LTR	Gypsy	Gypsy	Gypsy-20_PAb-I_plnrep	3.39975	3.42828	3.14794	3.59841	3.64632	3.67995	4.46274	4.46477	4.41448	3.76207	4.01957	4.03142	5.39603	5.39583	5.37528	6.06659	6.06142	6.03956	4.51066	4.52338	4.58362	6.15213	6.16311	6.15713	4.00446	3.95975	3.27242	5.57069	5.58885	5.60942
Retrotransposon	LTR	Gypsy	Gypsy	Gypsy-20_PGr-I_fungi	4.80621	5.1165	5.04414	3.4304	3.64414	3.50083	4.80607	4.70275	4.89784	3.86073	3.51898	5.14583	3.89691	3.97029	4.7362	3.44999	3.58352	3.90053	4.15104	4.64439	4.40672	3.42006	3.90053	3.8471	4.51556	4.54329	4.07565	3.87812	4.17219	4.2237
Retrotransposon	LTR	Gypsy	Gypsy	Gypsy-20_SMo-I_plnrep	3.50405	3.33768	3.60257	4.23411	4.22244	3.88773	1.46853	1.40877	1.62746	2.16905	1.1421	1.35812	2.93049	2.87482	2.91695	1.81238	1.58045	2.17125	2.07944	2.12389	2.31055	1.55814	1.93486	1.38629	5.25791	5.45139	5.22664	2.18766	2.56495	1.95051
Retrotransposon	LTR	Gypsy	Gypsy	Gypsy-20-I_DR_zebrep	1.098612289	1.32175584	0	6.109618625	6.355760378	5.955837369	0	1.098612289	1.098612289	1.098612289	0	0	1.871802177	1.609437912	1.609437912	0	1.609437912	0	1.098612289	1.098612289	0	0	1.098612289	1.098612289	1.098612289	1.098612289	1.098612289	0	1.098612289	1.098612289
Retrotransposon	LTR	Gypsy	Gypsy	Gypsy-203_ZM-I_grasrep	5.9489	5.84644	5.77072	5.481	5.72866	6.1709	2.74274	3.22807	3.19185	3.23212	2.89037	3.11668	2.92674	2.63906	2.48491	4.08877	3.68051	4.18965	3.57924	3.25166	2.61683	3.8712	3.83586	3.15506	0	0.693147	1.26851	4.02535	4.42604	4.2244
Retrotransposon	LTR	Gypsy	Gypsy	Gypsy-205_ZM-I_grasrep	1.95684	2.07944	1.84583	5.45318	5.4453	5.30614	1.8718	1.06784	1.7346	1.20397	2.00533	2.79029	0	0.693147	0	0	0	0	4.44768	4.52489	3.93934	0	0.693147	0	0.693147	0.693147	0.693147	0.693147	0	0
Retrotransposon	LTR	Gypsy	Gypsy	Gypsy-21_BRa-I_edcotrep	2.223032015	2.223032015	2.477302814	0	1.526056303	1.098612289	1.386294361	1.098612289	1.098612289	1.349925976	1.609437912	1.098612289	6.457452311	6.880109635	6.634764755	1.871802177	1.778856584	1.474401388	1.280933845	1.098612289	1.386294361	2.13750524	1.678430251	2.15397487	1.098612289	0	0	1.280933845	1.098612289	1.098612289
Retrotransposon	LTR	Gypsy	Gypsy	Gypsy-21_PAb-I_plnrep	2.37024	1.54756	3.02264	3.57235	3.01297	3.28943	4.36298	4.33333	4.3369	4.57417	5.05533	5.09948	5.03399	5.0605	5.0406	6.80754	6.77964	6.78063	4.32536	4.38273	4.38827	6.77709	6.7783	6.78205	1.84055	1.70475	1.79176	6.16684	6.15642	6.15328
Retrotransposon	LTR	Gypsy	Gypsy	Gypsy-21_PAb-LTR_plnrep	0	0	0	0	0	0	0.693147	0	0	0	0	0	0	0	0	7.5642	7.50527	7.55499	0	0	0.693147	7.57808	7.59338	7.56384	0	0	0	4.06044	4.0151	3.95124
Retrotransposon	LTR	Gypsy	Gypsy	Gypsy-21_RC-I_edcotrep	1.6514	2.68825	2.35344	0.693147	0.906721	1.98707	5.93898	5.69192	5.71655	3.7422	3.80058	3.6467	2.22897	2.3154	1.9534	0.916291	1.05605	1.21444	5.18295	5.72568	5.94883	1.06784	0.693147	0.967584	3.66099	3.80712	3.81502	2.37079	2.50433	2.3206
Retrotransposon	LTR	Gypsy	Gypsy	Gypsy-21_SCH-I_fngrep	0	0	0	0	0	0	2.197224577	2.014903021	2.014903021	3.496507561	4.890349128	5.010635294	1.098612289	0	0	0	0	1.098612289	1.791759469	0	1.098612289	0	0	0	0	1.098612289	0	1.098612289	0	0
Retrotransposon	LTR	Gypsy	Gypsy	Gypsy-21_ST-I_edcotrep	2.99302	3.37284	3.0673	5.2189	5.18121	5.34313	2.22848	2.10297	1.85958	2.61007	2.06686	1.96869	1.17272	1.33977	1.14117	0.938271	1.60944	1.30933	1.18958	1.28093	1.02962	1.113	1.15577	0.980831	2.00882	1.64412	1.6666	1.43075	0	1.38629
Retrotransposon	LTR	Gypsy	Gypsy	Gypsy-22_FV-I_edcotrep	4.10429	3.08429	3.84588	2.28667	2.05229	1.91876	5.1282	5.22151	5.39135	4.6856	4.0197	4.20656	2.07078	2.15948	2.3154	0.893816	0	1.32914	4.09434	4.23095	4.07268	1.20397	0.693147	1.34373	5.03938	4.55878	4.55475	1.41528	1.54045	1.42885
Retrotransposon	LTR	Gypsy	Gypsy	Gypsy-22_PAb-I_plnrep	5.54995	5.53344	5.49888	3.54696	3.53967	3.53583	4.52632	4.52383	4.44192	4.64302	4.60987	4.6089	4.70297	4.73155	4.76648	7.84119	7.82098	7.84013	4.65197	4.6235	4.6499	8.01276	8.00284	8.00538	2.0423	1.88569	1.92334	3.74351	3.59146	3.67507
Retrotransposon	LTR	Gypsy	Gypsy	Gypsy-22_PAb-LTR_plnrep	0	0	0	0	0	0	0.693147	0	0	0	0	0	0	0	0	6.37156	6.29965	6.33945	0	0	0	6.64122	6.63979	6.64859	0	0	0	0	0	0
Retrotransposon	LTR	Gypsy	Gypsy	Gypsy-22_ST-I_edcotrep	2.74798	2.50844	2.72458	2.68944	2.36967	2.448	2.47561	2.13044	1.75604	2.32456	2.41022	2.35597	5.43547	5.1134	5.09201	1.7802	2.37774	1.78416	2.3979	2.52072	2.44956	2.06002	2.47476	2.26003	1.0033	1.09861	0.693147	3.56577	3.49603	3.61285
Retrotransposon	LTR	Gypsy	Gypsy	Gypsy-22-I_DR_zebrep	1.38629	0.980831	1.62746	3.34639	2.77259	3.16407	5.75199	5.5033	5.55803	3.00238	3.06222	2.89729	3.63004	2.84297	2.98736	2.23359	3.12676	2.05412	3.80518	3.85964	3.85565	1.86322	2.05412	0.916291	1.60944	0.693147	1.86587	3.50656	3.20545	3.06805
Retrotransposon	LTR	Gypsy	Gypsy	Gypsy-220_AA-LTR_invrep	4.03129	3.98898	4.26268	3.6055	3.85439	3.53612	4.77068	4.5254	4.65078	4.72444	6.30688	6.36933	4.93344	5.00491	4.98816	3.91202	3.71357	3.60187	4.41482	4.37785	4.57028	4.78749	4.75646	4.74493	2.93386	3.14988	2.68558	4.60183	4.58836	4.27269
Retrotransposon	LTR	Gypsy	Gypsy	Gypsy-222_AA-I_invrep	1.400892291	1.098612289	1.446918983	1.098612289	1.098612289	0	1.098612289	1.349925976	1.223775432	0	1.098612289	1.16315081	5.535643863	5.119083039	5.126668652	1.609437912	0	1.098612289	1.098612289	0	0	1.098612289	1.526056303	1.098612289	1.32175584	1.098612289	1.609437912	3.549617387	3.871201011	3.407841924
Retrotransposon	LTR	Gypsy	Gypsy	Gypsy-226_DR-LTR_zebrep	5.38541	5.23547	5.476	3.75787	3.68171	4.00125	4.70853	4.94323	4.98056	2.04307	3.65251	4.1761	3.85545	3.51898	3.53473	1.20397	0	0	2.00533	1.38629	0.693147	0.693147	2.30259	0	2.22462	1.28093	2.15948	4.94955	4.90823	4.99721
Retrotransposon	LTR	Gypsy	Gypsy	Gypsy-23_ALY-I_edcotrep	2.43712	2.13436	1.77886	3.54496	3.75426	3.6469	4.24441	4.24144	4.70847	3.91202	4.34985	4.26208	4.57367	4.57487	4.57127	3.79569	3.63401	3.89776	4.30639	4.36212	4.2702	3.90153	4.13985	4.13399	5.46093	5.43441	5.5219	4.4675	4.52493	4.50908
Retrotransposon	LTR	Gypsy	Gypsy	Gypsy-23_PAb-I_plnrep	5.96366	5.99514	6.00444	3.76668	3.70017	3.64278	4.03439	3.96008	4.00435	3.4819	3.76427	3.81921	4.2508	4.27591	4.23796	7.18383	7.16944	7.19786	4.42497	4.39233	4.34009	7.33578	7.32227	7.32802	2.62536	3.54962	3.13859	2.30648	2.52026	2.61028
Retrotransposon	LTR	Gypsy	Gypsy	Gypsy-23_PAb-LTR_plnrep	0	0	0	0	0	1.31219	0	0	0	0	0	0	0	0	0	6.41054	6.38555	6.37936	0	0	0	6.52945	6.53876	6.5332	0.99853	0.693147	0	0	0	0
Retrotransposon	LTR	Gypsy	Gypsy	Gypsy-23-I_NVi_invrep	1.386294361	0	0	0	0	1.098612289	5.108149105	5.284218442	6.199494461	0	0	1.098612289	1.098612289	1.578184575	1.609437912	0	0	0	5.332718793	4.529907701	4.297285406	1.098612289	1.098612289	1.098612289	1.098612289	1.098612289	0	0	0	0
Retrotransposon	LTR	Gypsy	Gypsy	Gypsy-23-LTR_NVi_invrep	4.395682961	3.896706301	4.267117902	3.895893623	4.134438292	4.009927998	3.927201231	3.929208485	3.925774025	4.777828537	5.25411989	5.467410141	4.507715007	4.467343869	4.552256632	3.606402327	3.433987204	3.351254053	3.412246119	3.59535418	3.53760879	4.186151644	4.114723821	4.01035951	4.30019681	4.317488114	4.204692619	3.98367926	3.837299459	4.031285835
Retrotransposon	LTR	Gypsy	Gypsy	Gypsy-231_DR-LTR_zebrep	4.42684	4.00125	4.1957	4.2485	4.2312	4.33073	4.12066	3.44468	4.1957	4.23411	5.05533	5.17502	4.85203	4.81489	4.49024	3.18989	3.06473	3.19185	3.07064	3.76584	3.77506	4.46207	4.39973	4.4961	3.23212	3.56483	3.30811	4.2312	4.18965	4.07414
Retrotransposon	LTR	Gypsy	Gypsy	Gypsy-24_ALY-I_edcotrep	3.74344	3.77706	3.83193	3.691	3.42995	3.62529	1.87344	1.91239	1.95743	2.14758	1.95881	1.97897	3.8373	4.0151	4.2366	1.52444	1.46385	1.41227	2.41866	2.35522	2.4603	1.72924	2.32807	2.05951	5.16373	5.11842	5.19722	2.08722	1.84811	1.91692
Retrotransposon	LTR	Gypsy	Gypsy	Gypsy-24_BD-I_grasrep	1.46899	0.929535	1.78095	1.89712	1.7492	2.42238	1.49877	1.47727	1.77495	1.09861	0.693147	1.29928	5.94515	6.29047	5.94459	1.84583	1.22945	1.79176	1.68479	1.05252	1.26649	1.25276	1.88799	1.44036	3.29584	3.62244	3.36236	2.36713	2.22562	2.32239
Retrotransposon	LTR	Gypsy	Gypsy	Gypsy-24_PAb-I_plnrep	4.78482	4.89248	4.81833	4.2013	4.33336	4.24765	5.08485	5.19636	5.05336	5.59227	6.24874	6.2142	4.32529	4.4075	4.27995	6.09475	6.00518	6.05429	5.58643	5.55052	5.60785	6.06221	6.04964	6.06114	0	1.38629	1.28093	7.15636	7.15853	7.14181
Retrotransposon	LTR	Gypsy	Gypsy	Gypsy-24_PAb-LTR_plnrep	0	0	0	0	0	0	0	0	0	0	0	0	0	0	0	5.85704	5.82374	5.92408	0	0	0	5.5139	5.53525	5.46259	0	0	0	4.49512	4.6599	4.30407
Retrotransposon	LTR	Gypsy	Gypsy	Gypsy-24_RC-I_edcotrep	1.83525	2.01692	2.19722	2.51113	3.06359	2.48491	3.1591	3.30921	3.19616	3.81211	4.32276	4.39997	4.05072	4.06109	4.01464	2.52178	2.45042	2.6761	3.65339	3.59153	3.59344	2.54945	2.83855	2.76212	3.56348	2.71168	3.06857	5.51246	5.70573	5.76832
Retrotransposon	LTR	Gypsy	Gypsy	Gypsy-25_DWil-I_invrep	5.017279837	5.334649296	5.020585625	1.098612289	1.098612289	1.098612289	0	1.098612289	1.098612289	0	0	0	2.944438979	3.36729583	2.833213344	1.098612289	0	1.871802177	1.098612289	1.098612289	1.098612289	2.397895273	2.48490665	1.925290445	0	0	1.098612289	1.098612289	1.098612289	0
Retrotransposon	LTR	Gypsy	Gypsy	Gypsy-25_PAb-I_plnrep	3.45771	3.50255	3.48105	4.62515	4.86753	4.5626	5.59261	5.55241	5.59328	4.90673	4.99451	4.93468	4.58516	4.59345	4.62516	5.66716	5.65963	5.64652	5.58628	5.55399	5.58292	5.84697	5.85224	5.85674	1.49877	1.39842	1.53533	5.09838	5.12886	5.12734
Retrotransposon	LTR	Gypsy	Gypsy	Gypsy-25_PAb-LTR_plnrep	0	0	0	0	0	0	4.2552	4.16626	4.38127	0	0	0	4.64385	4.62784	4.61486	6.38124	6.36994	6.38491	4.12187	4.14738	4.31509	6.29036	6.28147	6.30667	0	0	0	5.61841	5.54839	5.67518
Retrotransposon	LTR	Gypsy	Gypsy	Gypsy-25_SB-I_grasrep	3.17299	3.16212	3.16506	4.56277	4.63635	4.9643	3.59186	3.4304	3.59696	3.10219	3.1625	3.5791	3.53046	3.58748	3.45425	2.34353	2.52444	2.30882	3.50255	3.63548	3.56934	3.0478	3.09423	2.88689	2.76795	2.80457	2.91476	5.00186	5.05609	4.88916
Retrotransposon	LTR	Gypsy	Gypsy	Gypsy-25_SP-I_spurep	0	0	0	2.07944	0.693147	0	2.62467	2.63906	1.95539	3.17805	3.07269	2.07944	5.13344	5.04729	5.17953	2.99573	2.63906	2.77259	3.66868	3.82864	3.68888	2.63906	1.79176	2.99573	0	0.693147	0	3.95672	4.00369	3.88773
Retrotransposon	LTR	Gypsy	Gypsy	Gypsy-25_ST-I_edcotrep	3.15167	3.12203	3.15936	4.02062	4.2088	4.01476	5.33634	5.41251	5.48458	4.49881	4.65641	4.64035	4.13843	4.08044	3.97488	4.14946	3.90524	4.19178	5.44857	5.45347	5.22909	4.46554	4.51208	4.61829	4.23893	4.18749	3.91493	4.14894	4.26094	4.15046
Retrotransposon	LTR	Gypsy	Gypsy	Gypsy-26_CT-LTR_invrep	1.098612289	2.302585093	1.504077397	4.394449155	4.804021045	5.030437921	3.091042453	2.63905733	2.674148649	2.944438979	1.945910149	2.014903021	0	0	0	2.151762203	1.871802177	2.079441542	3.258096538	3.091042453	2.197224577	2.079441542	2.397895273	2.140066163	5.109979749	4.983606622	5.438079309	1.098612289	1.098612289	0
Retrotransposon	LTR	Gypsy	Gypsy	Gypsy-26_DBp-I_invrep	1.098612289	1.386294361	1.386294361	5.033700567	4.379523504	4.11384976	0	1.098612289	1.299283893	1.405341801	1.85629799	2.550866036	2.423536438	2.251291799	2.136137279	1.098612289	0	1.421386371	0	0	0	1.098612289	1.76766143	1.609437912	0	1.098612289	0	3.594568775	4.791649753	3.731155591
Retrotransposon	LTR	Gypsy	Gypsy	Gypsy-26_PAb-I_plnrep	3.72428	3.61594	3.71461	4.04026	4.02202	4.03218	5.35557	5.32519	5.3286	4.61337	4.92611	4.83043	3.9599	3.90828	3.88123	4.62966	4.64371	4.65346	5.39551	5.40376	5.37355	4.65378	4.60517	4.63486	1.1499	0.693147	1.26369	4.93556	4.89602	4.91107
Retrotransposon	LTR	Gypsy	Gypsy	Gypsy-26_PAb-LTR_plnrep	0	0	0	0	0	0	2.07944	1.89712	1.88273	2.33537	2.59026	2.95193	3.30811	3.22591	2.83855	3.69346	3.58585	3.53316	2.35815	2.53142	2.50844	3.60128	3.59503	3.54132	0	0	0	5.40418	4.90527	5.41832
Retrotransposon	LTR	Gypsy	Gypsy	Gypsy-26_TC-I_edcotrep	4.08691	3.99755	3.83786	5.0626	5.21891	4.94274	3.81431	3.47072	3.82175	3.64954	3.99452	3.79462	4.98827	4.96403	5.04054	3.86558	3.66722	3.63143	3.68147	3.4693	3.57954	3.7369	3.8226	3.93813	3.55429	3.46809	3.44704	4.4794	4.67331	4.5144
Retrotransposon	LTR	Gypsy	Gypsy	Gypsy-266_AA-I_invrep	0	1.098612289	1.609437912	1.098612289	1.098612289	1.717651753	2.140066163	0	1.609437912	5.873525249	6.384350873	6.363889801	1.098612289	1.098612289	0	0	0	0	1.098612289	0	0	0	0	0	0	1.945910149	0	0	0	1.609437912
Retrotransposon	LTR	Gypsy	Gypsy	Gypsy-27_PAb-I_plnrep	3.0469	2.96183	2.78089	4.2327	4.21904	4.052	2.33214	2.28342	2.42472	2.18009	1.74224	1.82605	2.27979	2.20088	2.39622	7.07695	7.04427	7.04939	2.83191	2.35285	2.51036	7.10522	7.10896	7.1093	2.09025	2.51122	1.50071	4.07921	4.15037	4.18164
Retrotransposon	LTR	Gypsy	Gypsy	Gypsy-27_PAb-LTR_plnrep	0	0	0	0	0.693147	0	0	0	0	0	0	0	1.29928	0.693147	0.980831	7.15228	7.13756	7.1597	0	0	0	7.63688	7.61874	7.6292	0	0	0.693147	0	0	0
Retrotransposon	LTR	Gypsy	Gypsy	Gypsy-27-I_DR_zebrep	1.098612289	1.098612289	1.098612289	1.098612289	0	1.098612289	1.098612289	0	0	1.098612289	0	0	4.688720581	5.344723739	4.951592753	0	0	1.098612289	0	0	0	1.609437912	0	0	1.609437912	1.871802177	1.945910149	2.351375257	1.609437912	1.791759469
Retrotransposon	LTR	Gypsy	Gypsy	Gypsy-28_BD-I_grasrep	0	0	0.693147	1.29928	1.15577	1.04145	3.46574	3.32844	3.8636	0.693147	0	0	3.19545	2.85924	3.03655	3.83586	3.07438	3.43105	5.31689	4.61086	5.29581	3.27984	2.43945	3.06027	4.35671	4.21951	4.52179	1.54045	1.116	0.693147
Retrotransposon	LTR	Gypsy	Gypsy	Gypsy-28_BG-I_fngrep	1.977162385	2.214174556	2.268683886	1.909542505	2.014903021	2.197224577	2.054123734	2.044755631	2.335374593	1.945910149	2.614962217	2.751537441	3.688879454	4.137830206	3.967141674	1.734601644	2.564949357	1.887069649	2.671005785	1.945910149	2.341805806	2.065455441	2.140066163	2.525728644	6.717804695	6.282266747	6.193270053	1.32175584	1.098612289	1.435084525
Retrotransposon	LTR	Gypsy	Gypsy	Gypsy-28_Mad-LTR_edcotrep	2.87469	3.06507	2.8251	5.72782	5.67098	5.73042	3.99837	4.12835	4.16115	3.3673	3.4889	3.80837	4.81878	4.67607	4.56515	2.68186	2.60577	2.58141	3.94493	3.98768	4.22326	2.54174	2.76961	3.28268	3.50255	3.38721	3.44251	4.27852	4.55514	4.31157
Retrotransposon	LTR	Gypsy	Gypsy	Gypsy-28_PAb-I_plnrep	3.46905	3.62725	3.69828	2.53668	2.60404	2.68837	5.03881	5.03737	5.03031	5.12495	5.39609	5.37178	6.03564	6.00313	6.0124	6.48599	6.44797	6.45521	5.40281	5.38242	5.37498	6.54495	6.53953	6.55113	0.693147	0.693147	1.09861	7.82308	7.81747	7.81369
Retrotransposon	LTR	Gypsy	Gypsy	Gypsy-28_PAb-LTR_plnrep	0	0	0	0	0	0	6.27768	6.36288	6.2197	6.23732	6.7037	6.70259	7.5115	7.54591	7.57776	7.71731	7.67953	7.70455	6.44177	6.31376	6.65823	7.67373	7.658	7.66676	0	0	0	6.95372	6.97413	6.93793
Retrotransposon	LTR	Gypsy	Gypsy	Gypsy-28_SB-I_grasrep	5.87573	5.80015	5.7536	2.97953	3.09104	3.10189	3.76161	3.86484	4.31466	2.95027	2.60406	2.7313	4.29647	3.66478	3.82203	2.27181	2.28946	2.27727	3.71214	3.49745	3.94642	2.53898	2.56298	2.42964	3.70592	3.70833	3.76617	3.1371	3.48264	3.18762
Retrotransposon	LTR	Gypsy	Gypsy	Gypsy-281_AA-I_invrep	0	1.098612289	0	0	0	1.098612289	0	0	0	0	0	0	6.381816017	6.343880434	6.270988432	1.098612289	0	1.098612289	0	0	0	1.098612289	1.098612289	0	0	1.098612289	0	0	1.098612289	0
Retrotransposon	LTR	Gypsy	Gypsy	Gypsy-29_PAb-I_plnrep	4.45722	4.26295	4.4033	5.23636	5.38693	5.26522	4.03482	3.99014	3.97792	4.45683	4.54901	4.52424	4.99992	5.07072	5.03217	6.09184	6.05082	6.05584	4.13567	4.15569	4.1873	6.10678	6.10067	6.1084	4.72905	4.58856	4.7756	5.39326	5.35534	5.4398
Retrotransposon	LTR	Gypsy	Gypsy	Gypsy-29_PAb-LTR_plnrep	0	0	0	0	0	0	2.9768	3.45737	3.52243	2.44235	3.39283	3.33695	8.02594	8.10221	8.10054	6.3923	6.30746	6.33933	3.64109	3.48226	3.46574	6.42344	6.45223	6.43062	0	0	0	7.65804	7.38334	7.55245
Retrotransposon	LTR	Gypsy	Gypsy	Gypsy-29_PTr-I_dcotrep	6.04294	5.93382	5.93657	3.835	3.77087	3.80209	5.01572	5.11373	5.21403	3.36541	3.52112	3.2912	3.71257	3.59485	3.78606	3.38361	3.39451	3.28798	5.41323	5.49316	5.61786	3.67811	3.52958	3.5168	3.88096	3.75101	3.55535	3.47462	3.57601	3.5569
Retrotransposon	LTR	Gypsy	Gypsy	Gypsy-29_PTr-LTR_dcotrep	0	0	0	3.21888	3.38197	3.10608	4.33729	4.23618	3.97968	0.693147	1.38629	0.693147	0	0	0	0.693147	0.693147	1.51983	5.86079	6.17031	5.90127	0.693147	0	0.693147	0	0	0	0	0	0
Retrotransposon	LTR	Gypsy	Gypsy	Gypsy-29_SB-I_grasrep	3.42906	3.58059	3.50692	4.32626	4.62672	4.57887	3.26409	3.10079	3.11284	4.32927	4.82114	4.63347	4.3846	4.30211	4.36509	3.86182	3.73543	3.86073	3.47584	3.21523	3.48636	3.97871	4.00666	3.93958	4.26019	4.28703	4.2363	5.20495	5.18661	5.06484
Retrotransposon	LTR	Gypsy	Gypsy	Gypsy-3_AA-I_invrep	3.701301974	4.198037689	3.36729583	4.722953222	4.93901039	5.469746482	4.918520005	4.076061779	4.887608534	3.90197267	5.123963979	4.48863637	4.978704214	4.854955668	4.874349636	3.591065392	3.412246119	4.394449155	3.80666249	3.526360525	4.569543008	3.970291914	4.852030264	4.007333185	2.128231706	2.100061237	3.36729583	3.070635644	3.218875825	3.897633978
Retrotransposon	LTR	Gypsy	Gypsy	Gypsy-3_BD-I_grasrep	1.53623	1.84177	1.67398	2.86318	2.66549	2.64365	2.92077	2.9816	2.87901	2.11193	2.66941	2.67526	4.13956	4.1793	3.87743	3.17388	3.34698	3.34713	2.65676	3.1144	3.16003	3.46482	3.45235	3.29644	6.04042	5.69113	6.20619	3.47666	3.54292	3.21608
Retrotransposon	LTR	Gypsy	Gypsy	Gypsy-3_CP-I_edcotrep	2.87202	3.17597	2.90645	4.204	4.11313	4.34839	4.98799	5.0117	5.1227	4.07145	4.04204	4.05283	4.35976	4.19099	4.28359	4.34594	4.19587	4.15918	4.97183	4.91673	5.02585	4.29512	4.43055	4.38961	4.10264	4.3108	3.98434	4.23668	4.02832	4.13808
Retrotransposon	LTR	Gypsy	Gypsy	Gypsy-3_DPer-I_invrep	1.098612289	0	1.098612289	3.926911618	3.974997805	3.910203351	0	0	0	1.658228077	1.098612289	1.098612289	2.917770732	3.113515309	2.708050201	3.588138806	4.549657476	3.923073721	0	0	0	5.121407142	5.545177444	5.560681631	1.098612289	1.098612289	1.098612289	3.283415596	3.642835516	3.683866912
Retrotransposon	LTR	Gypsy	Gypsy	Gypsy-3_ECa-I_edcotrep	1.098612289	1.098612289	1.722766598	2.104134154	1.504077397	1.098612289	1.35812377	1.098612289	1.609437912	6.03667689	5.469114437	4.530333487	2.219203484	2.05017106	1.877701664	1.4663363	1.860752118	1.563976003	1.098612289	0	1.679642849	2.09714147	1.098612289	1.386294361	0	0	0	4.157461761	4.161113407	4.534985891
Retrotransposon	LTR	Gypsy	Gypsy	Gypsy-3_Mad-I_dcotrep	2.68677	2.3979	2.35643	3.59319	4.03908	3.48157	3.06078	3.14258	2.92844	2.67644	2.67759	2.7879	4.76573	4.7989	4.85002	3.07603	2.94608	2.91196	3.10283	3.34963	3.23173	3.1056	3.2004	3.08022	3.16669	3.41289	3.26784	5.83177	5.68307	5.90382
Retrotransposon	LTR	Gypsy	Gypsy	Gypsy-3_PAb-I_plnrep	2.79409	2.9138	2.8006	4.86079	4.71701	4.68262	3.74707	3.60575	3.45578	3.63145	3.46102	3.55725	5.3419	5.34101	5.47112	7.05153	7.15521	7.01999	3.88841	4.06178	3.80939	7.73169	7.72994	7.72837	2.04898	2.19067	2.18792	3.95622	3.90042	4.04475
Retrotransposon	LTR	Gypsy	Gypsy	Gypsy-3_PAb-LTR_plnrep	1.386294361	1.609437912	1.098612289	1.098612289	1.098612289	1.098612289	1.717651753	1.429466392	1.488076733	2.014903021	1.801515062	1.728390042	1.64222838	1.765092033	1.631416602	5.708902677	5.718296633	5.641098233	1.386294361	1.098612289	1.280933845	4.585063392	4.798110167	4.618994193	1.098612289	1.098612289	1.265665091	1.609437912	1.098612289	1.098612289
Retrotransposon	LTR	Gypsy	Gypsy	Gypsy-3_RC-I_edcotrep	2.85902	2.63074	2.78089	2.92581	2.89359	2.85512	3.55565	3.54355	3.57574	4.03732	4.12713	4.24592	4.24904	4.23065	4.19268	3.38277	3.11034	3.17413	3.2786	3.5646	3.45724	3.2376	3.24519	3.26915	6.19926	6.22094	6.37038	3.98938	3.92646	3.89202
Retrotransposon	LTR	Gypsy	Gypsy	Gypsy-3_TC-I_edcotrep	5.19172	5.33272	5.41053	1.93284	1.09861	1.7492	0	1.7346	0.693147	2.33075	3.24519	3.44468	1.12847	1.33977	1.79176	0.693147	1.79176	0.693147	0.693147	0	1.29928	2.00533	1.79176	0.693147	0	0	0	1.94591	2.07944	2.61496
Retrotransposon	LTR	Gypsy	Gypsy	Gypsy-3_Trm-I_fungi	0	0	0	0	0	0	0.693147	1.69168	0.693147	1.38629	1.83258	1.23214	3.46574	3.17805	3.55942	2.35815	2.4108	1.38629	1.7346	0	1.58045	0.693147	1.74297	2.18122	0	0	0.693147	5.63558	5.51611	5.92731
Retrotransposon	LTR	Gypsy	Gypsy	Gypsy-3-LTR_AF_fngrep	2.501435952	2.014903021	1.504077397	2.197224577	1.945910149	1.945910149	1.098612289	1.098612289	0	2.197224577	2.442347035	2.708050201	1.098612289	1.098612289	1.098612289	2.624668592	1.945910149	1.757857918	0	1.504077397	0	5.023880521	4.772378105	5.093750201	0	1.335001067	1.945910149	0	1.098612289	1.098612289
Retrotransposon	LTR	Gypsy	Gypsy	Gypsy-30_DWil-I_invrep	2.984125171	3.73289634	3.529030487	1.504077397	1.280933845	1.504077397	2.602689685	3.044522438	2.871681512	7.805576495	2.73622293	3.880625213	1.880313545	1.769781377	2.546683549	3.100092289	2.590264665	2.564949357	2.233591864	2.908719078	2.197224577	1.926679273	2.592534593	1.725509262	1.85629799	2.586688269	2.140066163	1.572396263	2.1102132	2.197224577
Retrotransposon	LTR	Gypsy	Gypsy	Gypsy-30_Mad-LTR_edcotrep	3.4012	2.92162	3.48343	0	0	0	0	0	0.693147	0	0	0.693147	7.09365	7.2659	7.21671	3.97029	3.98368	3.80983	0.693147	0.693147	0	3.37221	3.48343	3.52636	0	0	1.38629	2.57588	2.67415	2.62104
Retrotransposon	LTR	Gypsy	Gypsy	Gypsy-30_PAb-I_plnrep	3.03082	3.13065	3.0644	4.8389	4.86445	5.02154	4.93644	4.86034	4.90171	4.78926	5.01986	4.91215	5.74404	5.68788	5.72481	7.86399	7.83008	7.84614	5.00123	4.99058	4.98031	7.96945	7.96384	7.97234	4.48333	4.68659	4.60784	5.49568	5.55305	5.53919
Retrotransposon	LTR	Gypsy	Gypsy	Gypsy-30_PAb-LTR_plnrep	1.098612289	0	0	1.098612289	0	0	0	0	0	1.098612289	0	0	1.098612289	1.609437912	1.098612289	7.191602508	6.975965177	6.958486415	0	0	0	6.741484615	6.751833365	6.735355934	1.098612289	0	0	0	0	0
Retrotransposon	LTR	Gypsy	Gypsy	Gypsy-30_SB-I_grasrep	4.54383	4.33675	4.65343	4.27667	4.3444	4.26998	2.87639	3.1964	3.09104	4.14225	4.14578	3.95975	3.83374	3.81136	3.92646	3.24333	2.91919	2.62177	3.1805	3.102	3.09104	2.78295	2.7379	3.34313	5.23368	5.15817	5.22492	4.81776	4.93762	4.92777
Retrotransposon	LTR	Gypsy	Gypsy	Gypsy-30_ST-I_edcotrep	5.04874	4.95568	5.05597	3.07365	2.79418	2.8603	3.30717	3.47733	3.3835	3.07496	3.24169	2.9134	2.93552	3.04519	3.13681	3.061	2.69941	3.03347	4.00921	3.93244	4.1234	2.9568	3.09428	3.46126	2.47984	2.67296	2.5686	3.80574	3.42358	3.49217
Retrotransposon	LTR	Gypsy	Gypsy	Gypsy-30-I_NVi_invrep	0	0	0	0	0	0	2.38262	2.31912	3.10608	3.76892	4.02535	3.73767	4.04888	4.18459	3.77659	3.70541	3.885	3.3474	2.33075	1.89712	2.19722	2.82477	2.89037	2.70805	1.63761	1.7346	2.07944	6.00353	6.05131	5.89872
Retrotransposon	LTR	Gypsy	Gypsy	Gypsy-31_ALY-I_edcotrep	3.03829	2.57237	3.35574	2.98568	2.37024	2.53687	2.74572	2.91439	3.49286	2.5445	2.74849	2.16444	3.32263	3.04245	3.17442	1.07264	0.81093	1.02962	3.01431	3.36089	3.18294	1.71008	1.43282	1.77071	5.14788	5.07947	5.05877	3.10696	3.34551	3.38326
Retrotransposon	LTR	Gypsy	Gypsy	Gypsy-31_OD-LTR_invrep	1.658228077	1.335001067	1.252762968	0	0	1.098612289	1.386294361	1.223775432	1.098612289	0	1.098612289	2.014903021	1.098612289	1.609437912	1.098612289	1.098612289	0	0	0	1.098612289	0	1.098612289	0	1.757857918	1.609437912	1.386294361	2.197224577	5.176149733	5.017279837	4.158883083
Retrotransposon	LTR	Gypsy	Gypsy	Gypsy-31_PAb-I_plnrep	6.34712	6.29233	6.34772	3.99766	3.94103	3.95124	4.72656	4.74775	4.71943	4.70183	4.79611	4.79277	4.25704	4.25548	4.27955	4.84743	4.84659	4.85669	4.95702	4.88756	4.95386	4.94235	4.94684	4.95726	2.73771	2.40267	3.06443	6.68959	6.68935	6.70512
Retrotransposon	LTR	Gypsy	Gypsy	Gypsy-31_ST-I_edcotrep	4.61673	4.24474	4.59596	6.25925	6.03934	6.11168	4.25482	4.17895	4.34911	3.98898	4.11932	3.88795	4.94288	5.0846	5.03695	4.04455	3.69455	4.23203	4.3434	4.23391	4.33312	4.17208	4.53425	3.85936	4.96731	5.15638	4.97414	3.69196	3.67693	3.80209
Retrotransposon	LTR	Gypsy	Gypsy	Gypsy-31-LTR_DR_zebrep	6.05804	5.77259	6.16472	5.67517	5.8001	5.46473	3.58352	4.20875	4.05099	4.89659	5.74727	5.69092	3.98898	3.35428	4.10905	4.14169	4.05352	3.8712	3.7202	3.09104	3.9407	4.97788	4.78749	4.84918	2.92316	2.91235	3.03922	4.84419	4.42801	4.58125
Retrotransposon	LTR	Gypsy	Gypsy	Gypsy-32_ALY-I_edcotrep	5.2062	4.95831	5.01241	1.79176	2.0149	1.79176	1.60944	1.60944	1.60944	0.693147	0.693147	0.693147	1.29928	1.76359	0.693147	1.63761	1.62113	1.34707	1.67398	1.55335	2.00882	1.95684	1.38629	1.63142	0.693147	0	0	0.693147	0.693147	0
Retrotransposon	LTR	Gypsy	Gypsy	Gypsy-32_CGi-I_invrep	5.60183	5.78968	5.6739	0	0	0	0	0.693147	0.693147	0	0	0	2.87168	3.43399	2.99573	0	0.693147	0	0.693147	0.693147	0.693147	0	0.693147	0	0	0	0	1.01857	0.693147	0
Retrotransposon	LTR	Gypsy	Gypsy	Gypsy-32_CPB-I_vrtrep	0	0	0	1.098612289	0	0	0	0	0	3.80666249	4.570578741	5.209486153	0	0	0	0	0	0	0	0	0	0	0	0	0	0	1.098612289	1.098612289	1.860752118	2.708050201
Retrotransposon	LTR	Gypsy	Gypsy	Gypsy-32_Mad-LTR_edcotrep	0	0	1.098612289	0	0	0	0	1.609437912	1.098612289	0	0	0	4.836281907	5.001258132	5.129898715	0	1.098612289	1.098612289	0	0	0	0	0	0	0	0	0	0	0	0
Retrotransposon	LTR	Gypsy	Gypsy	Gypsy-32_PAb-I_plnrep	3.81563	3.69234	3.73337	5.17718	5.17445	5.18186	6.53099	6.53182	6.54828	5.33341	5.41739	5.43947	5.84984	5.87375	5.82397	5.80332	5.7707	5.81843	6.55425	6.56376	6.5618	5.80821	5.82864	5.80548	4.26369	3.92112	4.16549	5.44951	5.40179	5.4087
Retrotransposon	LTR	Gypsy	Gypsy	Gypsy-32_PAb-LTR_plnrep	0	0	0	0	0	0	0	1.098612289	1.098612289	0	0	0	2.197224577	1.902984753	2.176171168	5.422148741	5.961618554	5.854527361	1.609437912	2.197224577	1.098612289	5.154117843	5.118185411	5.231108617	0	0	1.098612289	1.098612289	1.582409925	1.098612289
Retrotransposon	LTR	Gypsy	Gypsy	Gypsy-32_VV-I_edcotrep	4.979488565	4.612069332	5.157617484	1.098612289	1.203971804	1.652922599	1.521469714	1.561236675	1.098612289	2.648328505	2.956747133	3.044522438	3.044522438	2.786910672	2.265047283	3.183990341	3.386807678	3.333632062	1.670681637	1.969441112	1.374317929	2.716897614	2.692422049	2.965273066	1.435084525	1.098612289	1.098612289	3.337682337	3.292984654	3.34830632
Retrotransposon	LTR	Gypsy	Gypsy	Gypsy-33_ALY-I_edcotrep	4.51452	4.24372	4.43651	3.55535	3.593	3.64482	2.11021	2.07944	1.14513	5.09443	4.53761	4.91118	2.71249	2.62025	2.26176	0.693147	1.7346	0.693147	2.82868	2.95651	3.23212	0	1.38629	0.693147	3.56752	3.26321	2.90508	4.93303	5.31131	5.2575
Retrotransposon	LTR	Gypsy	Gypsy	Gypsy-33_Mad-LTR_edcotrep	0.693147	0.693147	0.693147	3.90533	4.07754	4.12713	0	0	0	0	0	0	6.64639	6.57128	6.63369	4.11087	3.59927	3.77112	0	1.38629	0	3.70306	3.90629	3.4012	0	0	0	2.33075	2.73003	2.50844
Retrotransposon	LTR	Gypsy	Gypsy	Gypsy-33_PAb-I_plnrep	3.6414	3.54023	3.78611	3.81039	3.78451	3.5656	5.70262	5.66836	5.65653	5.33601	5.43656	5.41372	4.90731	4.83263	4.88501	6.95851	6.92219	6.93105	5.70655	5.70961	5.63848	7.08531	7.07385	7.07443	4.96546	5.37275	5.47276	5.7058	5.69096	5.69011
Retrotransposon	LTR	Gypsy	Gypsy	Gypsy-33_PAb-LTR_plnrep	0	0	0	0	0	0	0	0	0	0	1.098612289	0	1.609437912	1.098612289	1.098612289	6.761541518	6.90466852	6.857298477	0	0	0	6.465036801	6.479624228	6.485639312	1.609437912	0	1.945910149	2.061422673	1.504077397	0
Retrotransposon	LTR	Gypsy	Gypsy	Gypsy-33_PIT-I_plnrep	0	0	0	1.098612289	0	0	0	1.098612289	0	1.098612289	1.386294361	1.098612289	2.197224577	2.833213344	2.397895273	0	1.098612289	0	0	0	0	0	0	1.098612289	0	1.609437912	1.098612289	5.857933154	5.631211782	5.041991832
Retrotransposon	LTR	Gypsy	Gypsy	Gypsy-33_SB-I_grasrep	3.147839438	2.821378886	3.384390263	2.818398258	2.57671069	2.852629507	1.252762968	1.845826164	1.315676062	2.014903021	2.261763098	2.155981198	5.49436101	5.96777618	6.019565977	3.491647285	3.557542794	3.382934968	1.690289524	1.572396263	1.765783325	3.347395681	3.352822631	3.478673722	0	0	0	1.845826164	1.96165835	2.238046572
Retrotransposon	LTR	Gypsy	Gypsy	Gypsy-33_SSa-I_vrtrep	0	0	0	1.098612289	0	0	0	0	0	0	1.098612289	0	0	0	1.098612289	4.905274778	4.569270432	4.708628894	0	0	1.098612289	5.212601514	4.603740164	4.983606622	0	0	0	0	0	1.098612289
Retrotransposon	LTR	Gypsy	Gypsy	Gypsy-34_BRa-I_edcotrep	1.5235	1.94591	1.58412	1.1314	1.53393	2.06142	1.33977	1.65596	2.02228	1.65596	1.62746	1.58412	4.39621	4.24757	4.49155	1.4871	1.62746	1.40339	2.1471	1.71765	2.30259	2.07944	1.79176	1.54992	6.3677	5.99783	5.95611	0.693147	1.03799	0.693147
Retrotransposon	LTR	Gypsy	Gypsy	Gypsy-34_PAb-I_plnrep	2.87861	2.76714	2.78442	2.24374	2.77259	2.4689	5.34017	5.3845	5.37031	3.99755	3.92662	4.16465	2.47321	2.53193	2.30997	7.93873	7.90531	7.92255	5.55848	5.51147	5.36255	8.00017	7.99397	7.99062	0	1.29098	0.693147	2.00821	2.07944	2.36
Retrotransposon	LTR	Gypsy	Gypsy	Gypsy-34_PAb-LTR_plnrep	0	0	0	0	0.693147	0	4.45646	3.91452	4.31526	2.07944	2.83321	2.48491	4.41884	5.12396	5.45532	7.62046	7.5432	7.61641	4.61016	4.74097	4.64735	7.57311	7.58343	7.50665	0	0	0	3.22883	3.57337	4.15032
Retrotransposon	LTR	Gypsy	Gypsy	Gypsy-34_SB-I_grasrep	2.00882	2.4773	2.10413	1.42266	2.14007	2.3394	5.61069	5.2389	5.6486	3.10309	3.74497	3.23521	3.75271	3.78419	3.84179	2.94134	2.43465	3.58352	4.67829	5.04381	4.90209	3.41324	3.47816	3.79549	4.16888	4.40455	4.23712	1.38629	0	1.68053
Retrotransposon	LTR	Gypsy	Gypsy	Gypsy-34_ST-I_edcotrep	3.55535	3.00678	3.03389	1.20397	1.96944	0.693147	2.76938	2.81159	2.63625	2.08677	2.2415	2.24469	4.26619	4.34887	4.24338	2.99573	1.79176	2.02228	2.16799	2.3979	1.91851	2.99573	2.3477	2.28708	5.48716	5.56098	5.58959	3.55014	3.66356	3.35905
Retrotransposon	LTR	Gypsy	Gypsy	Gypsy-34_VV-I_edcotrep	3.93235	3.58967	3.58578	3.13046	3.37005	2.99036	2.04507	2.06417	2.06369	3.23212	3.51019	3.26767	2.73437	2.57588	2.51568	2.79213	2.67596	2.28646	2.81212	2.9768	2.56298	1.90617	2.05127	2.20644	5.45674	5.42333	5.41844	4.00684	3.87449	3.75308
Retrotransposon	LTR	Gypsy	Gypsy	Gypsy-35_CGi-I_invrep	2.244691115	2.444232214	2.061422673	1.757857918	1.098612289	1.810108426	1.36687706	1.945910149	1.578184575	1.85629799	2.020944733	1.99242971	5.405677382	5.676753802	5.345301138	2.590264665	2.981344261	3.11863109	0	0	1.349925976	3.797260653	3.6451966	3.893859035	1.098612289	1.349925976	1.098612289	5.644524211	5.52012803	5.662811163
Retrotransposon	LTR	Gypsy	Gypsy	Gypsy-35_DAn-LTR_invrep	2.178532067	2.550866036	2.302585093	1.996554376	1.369486395	1.584120104	2.047692843	1.727220948	1.676690871	3.747148362	2.047692843	2.356652735	5.648974238	5.37296091	5.61707287	1.945910149	1.871802177	1.504077397	1.098612289	1.791759469	1.609437912	1.929909969	1.760987498	1.309920747	2.036882362	1.312187543	1.648658626	2.512302921	3.11149104	2.990161787
Retrotransposon	LTR	Gypsy	Gypsy	Gypsy-35_DEl-I_invrep	0	0	0	0	0	0	4.5326	3.62797	4.11087	0.693147	0	0	2.48491	1.60944	2.00882	1.38629	0	0	5.00171	4.18713	3.92307	0	0.693147	0.693147	1.79176	0	1.99243	0.693147	0	0
Retrotransposon	LTR	Gypsy	Gypsy	Gypsy-35_Mad-I_edcotrep	5.28102	5.46504	5.17696	4.25325	4.23893	4.19828	4.34812	4.47734	4.20256	3.31159	4.33947	4.79854	4.16334	4.21459	4.10382	0.693147	0	0.693147	0.693147	0	2.07944	2.54945	2.12026	2.45101	2.17475	2.11453	1.89712	4.0555	4.15441	4.57028
Retrotransposon	LTR	Gypsy	Gypsy	Gypsy-35_NVi-I_invrep	1.098612289	1.665006953	1.455286233	0	1.299283893	1.098612289	1.098612289	1.098612289	1.098612289	1.098612289	0	1.098612289	2.251291799	2.662585501	2.397895273	5.479805243	5.564520407	5.783825182	0	1.098612289	1.098612289	5.183316083	5.290285195	5.986954392	0	1.386294361	0	3.70745584	3.479839108	3.891820298
Retrotransposon	LTR	Gypsy	Gypsy	Gypsy-35_PAb-I_plnrep	4.03618	4.35371	4.04001	4.52749	4.59328	4.4982	4.55658	4.60388	4.66388	5.68779	5.91006	5.89759	4.39787	4.3404	4.37725	6.64458	6.62697	6.62654	4.72813	4.70998	4.69135	6.53065	6.53715	6.52605	3.40698	3.09407	3.30199	5.37664	5.33103	5.47744
Retrotransposon	LTR	Gypsy	Gypsy	Gypsy-35_PAb-LTR_plnrep	0	0	0	0	0	0	0	0	0	0	0	0	0	0	0	4.07511	4.14991	4.17285	0	0	0	5.42264	5.22575	5.34256	0	0	0	0	0	0
Retrotransposon	LTR	Gypsy	Gypsy	Gypsy-36_GM-I_edcotrep	1.871802177	1.421386371	1.098612289	1.540445755	2.197224577	1.749199855	1.386294361	1.32175584	1.262240769	5.378513909	5.252927664	5.144414156	1.32175584	2.079441542	1.280933845	3.615232914	3.104689812	3.211790785	1.098612289	1.16315081	1.474401388	3.716929838	3.964886766	3.993846281	2.047692843	1.907069821	2.071072872	1.098612289	1.098612289	1.098612289
Retrotransposon	LTR	Gypsy	Gypsy	Gypsy-36_PAb-I_plnrep	3.24198	2.95719	3.03049	4.62497	4.59146	4.88623	5.18882	5.17942	5.15882	4.55326	4.5817	4.49992	4.18678	4.23559	4.25989	5.51516	5.48609	5.50419	5.16842	5.19441	5.14445	5.55276	5.57198	5.57485	1.72277	1.38629	1.87877	5.66069	5.63358	5.66393
Retrotransposon	LTR	Gypsy	Gypsy	Gypsy-36_PAb-LTR_plnrep	0	0	0	0	0	0	0	0	0	0	0	0	0	0	0	5.75308	5.67166	5.71065	0	0	0	5.74651	5.76286	5.69688	0	0	0	0	0	0
Retrotransposon	LTR	Gypsy	Gypsy	Gypsy-36_ST-I_edcotrep	4.12633	4.30844	4.02109	3.5225	3.58264	3.66722	3.58279	3.67112	3.66459	4.63306	4.79854	5.0109	3.42426	3.45655	3.38014	2.82801	2.86652	2.87904	3.85913	3.93027	3.82148	3.07758	3.26348	3.12889	4.01257	4.3335	4.22871	4.64322	4.20376	4.31289
Retrotransposon	LTR	Gypsy	Gypsy	Gypsy-36C_ATr-I_plnrep	2.811593066	3.188061915	2.854111104	2.9995699	3.316205782	3.171784217	1.482833331	1.548812791	1.280933845	2.429297036	2.672195018	2.342143249	4.003285002	3.965161796	4.177878093	5.567611411	5.396314841	5.36557874	1.393411474	1.345136373	1.810108426	5.048374141	5.142598792	5.025825996	3.754533759	3.185835971	3.427823084	2.561983425	2.373353853	2.481567749
Retrotransposon	LTR	Gypsy	Gypsy	Gypsy-36C_ATr-LTR_plnrep	3.424728344	3.035827604	3.747822663	1.609437912	1.871802177	2.674148649	4.313671506	3.672071488	3.891820298	4.204692619	5.289947436	4.946573104	3.073406024	2.957511061	3.473518043	3.234749174	3.250374492	2.856470206	3.742420221	3.374168709	3.310543013	3.673765816	3.555348061	3.462257987	1.609437912	1.098612289	1.609437912	3.928254558	3.77111821	3.93892975
Retrotransposon	LTR	Gypsy	Gypsy	Gypsy-37_BD-I_grasrep	1.12847	0.693147	0.693147	0.693147	0	0	2.8006	2.56495	2.80768	2.03143	3.04452	3.3322	5.66296	5.27691	5.2546	2.07944	1.73912	1.04145	2.12389	1.97716	2.48491	1.07264	1.38629	1.79176	0	0	0	0.693147	0.693147	2.07944
Retrotransposon	LTR	Gypsy	Gypsy	Gypsy-37_DAn-LTR_invrep	4.732683506	4.672828834	4.569543008	1.349925976	1.609437912	1.386294361	1.609437912	1.887069649	1.974081026	5.757323242	2.09714147	2.472926844	1.704748092	2.374905755	3.044522438	1.098612289	1.609437912	1.098612289	1.609437912	0	1.791759469	1.717651753	1.717651753	1.408767439	2.890371758	2.423536438	2.646961722	1.098612289	1.098612289	1.098612289
Retrotransposon	LTR	Gypsy	Gypsy	Gypsy-37_PAb-I_plnrep	3.83987	4.0577	3.79888	5.10823	4.99598	4.98091	5.14366	5.1473	5.12077	4.94915	4.79275	4.8013	4.46548	4.48619	4.42518	4.5512	4.53696	4.5746	5.01679	5.07621	5.07718	4.52409	4.54157	4.54928	5.03261	4.63817	4.72397	5.95376	5.94945	5.94609
Retrotransposon	LTR	Gypsy	Gypsy	Gypsy-38_BD-I_grasrep	0	0	0.693147	0	1.38629	0.693147	3.18152	3.48124	3.12822	1.50408	3.4012	1.33977	0.965081	1.38629	1.5235	1.60944	1.60944	1.06784	5.54908	5.30445	5.41356	0.693147	1.17272	1.25276	0	0	0	0	0.847296	1.02962
Retrotransposon	LTR	Gypsy	Gypsy	Gypsy-38_Mad-I_edcotrep	2.18122	2.4108	1.28093	4.46399	4.85203	4.82028	1.8506	1.38629	2.45674	3.07487	2.67031	2.81033	2.1848	2.36383	1.99243	1.38629	1.17007	1.22723	1.59393	1.62268	2.02438	1.38629	0	0.995427	7.95527	7.93809	7.93093	0.980831	1.04145	1.94591
Retrotransposon	LTR	Gypsy	Gypsy	Gypsy-38_PAb-I_plnrep	4.19671	4.11841	4.19776	4.27396	4.06044	4.17039	4.19889	4.2156	4.22788	5.05309	5.46432	5.42878	4.16132	4.18592	4.32842	6.38918	6.34677	6.35427	4.40351	4.33135	4.27314	6.37965	6.39135	6.38929	2.8607	2.0266	2.95651	4.7966	4.80811	4.85296
Retrotransposon	LTR	Gypsy	Gypsy	Gypsy-38_PAb-LTR_plnrep	0	0	0	0	0	0.693147	1.38629	0	0.693147	0	0	0	0	0	0	6.54064	6.50761	6.53251	0	0	0	6.4788	6.49441	6.4868	0.693147	0	0	0	0	0
Retrotransposon	LTR	Gypsy	Gypsy	Gypsy-39_BD-I_grasrep	2.07944	2.45674	2.61496	0	0	0	0	0.693147	0	0	1.79176	0.693147	1.79176	1.38629	0	3.2581	1.97081	1.99243	0	0	0	2.48491	2.30259	2.48491	0	0	0	6.01372	6.00635	5.93666
Retrotransposon	LTR	Gypsy	Gypsy	Gypsy-39_PAb-I_plnrep	2.31729	2.32263	2.5737	4.73363	4.63282	4.44554	5.02709	5.10505	5.00641	5.76628	5.849	5.79251	4.53017	4.5927	4.56844	6.63902	6.58271	6.61078	5.21337	5.20891	5.19688	6.74391	6.73277	6.73664	3.65573	3.13176	2.93342	5.8539	5.75627	5.82549
Retrotransposon	LTR	Gypsy	Gypsy	Gypsy-39_PAb-LTR_plnrep	0	0	0	0	0	0.693147	5.50668	5.48504	5.83083	5.55053	5.75308	5.7869	0	0	0	7.05852	7.00398	7.02606	5.6966	5.63412	5.40042	7.37621	7.40043	7.40054	0	0	0	3.84588	3.98072	3.97656
Retrotransposon	LTR	Gypsy	Gypsy	Gypsy-4_ALY-I_edcotrep	3.42128	3.13549	3.13215	5.3071	5.3731	5.33218	2.41591	3.45316	2.97893	4.32722	3.70746	4.36522	4.53358	4.60604	4.57041	2.63906	1.98413	1.26113	2.3979	2.82138	2.4681	1.64866	1.90617	0.980831	3.52636	3.65419	2.86853	1.97716	2.13163	2.61683
Retrotransposon	LTR	Gypsy	Gypsy	Gypsy-4_BD-LTR_grasrep	4.18965	3.81991	4.01096	4.28772	4.30407	4.40672	3.42751	3.16407	3.42318	2.30259	3.17805	2.99573	5.78177	5.83481	5.7828	2.77259	2.89037	3.09104	3.56483	3.2581	3.12676	3.1209	2.97553	3.04452	1.79176	1.38629	1.79176	2.84491	3.10906	3.01553
Retrotransposon	LTR	Gypsy	Gypsy	Gypsy-4_CP-I_edcotrep	3.77404	3.66676	3.80944	2.53093	2.8467	2.79239	5.64921	5.53758	5.18701	3.77426	3.24951	3.29225	2.63458	2.25465	2.52451	2.97205	3.21398	3.19681	5.21516	5.5454	5.27878	3.37767	3.30014	3.40409	3.22642	3.49964	3.4414	3.04452	3.03769	3.51866
Retrotransposon	LTR	Gypsy	Gypsy	Gypsy-4_FV-I_edcotrep	3.64779	3.77319	3.74769	3.0016	3.05046	3.0998	3.7525	3.79568	3.70916	3.2894	3.59952	3.62946	5.16471	5.08234	5.30517	3.38857	3.53791	3.48163	3.72273	3.63846	3.58352	3.85042	3.83313	4.25002	3.53332	3.64787	3.44316	4.15449	4.03826	4.05362
Retrotransposon	LTR	Gypsy	Gypsy	Gypsy-4_Mad-I_dcotrep	1.19214	1.38629	1.24521	1.12393	1.89256	1.70907	3.04884	2.44408	2.18605	0.693147	0.693147	1.25276	2.82785	2.74332	2.55834	1.81916	1.87584	1.40282	2.1838	2.27615	2.88418	2.85417	2.97893	2.87267	5.14166	4.45857	5.16288	3.03769	3.46244	3.2613
Retrotransposon	LTR	Gypsy	Gypsy	Gypsy-4_PAb-I_plnrep	3.76296	3.70502	3.85787	4.40098	4.34419	4.38096	6.82432	6.84474	6.82485	7.48761	7.54418	7.52248	3.65224	3.69614	3.61456	4.96066	4.91789	4.90701	6.57307	6.52336	6.53944	5.31358	5.31492	5.35419	1.3622	1.27297	0.693147	3.1288	2.96745	3.09732
Retrotransposon	LTR	Gypsy	Gypsy	Gypsy-4_PAb-LTR_plnrep	0	0	0	0	0	0	2.30259	1.63761	0.693147	5.91889	6.20456	6.2111	0	0	0	3.36932	3.03608	3.44718	0	1.58045	1.58045	4.82407	4.76067	4.80112	0	0	0	0	0	0
Retrotransposon	LTR	Gypsy	Gypsy	Gypsy-4_PSt-I_fungi	5.83885	5.74546	5.73806	0	0	0	2.66259	3.17805	2.70805	2.5123	2.70805	2.58571	2.77259	2.89037	2.07944	2.07944	2.30259	2.99573	3.06027	3.01226	2.66259	2.26868	2.07944	1.79176	0.693147	0	0	0.693147	0	0
Retrotransposon	LTR	Gypsy	Gypsy	Gypsy-4-I_XT_	2.584	3.17162	3.35574	2.56089	2.65926	2.17125	2.49364	2.09849	2.37079	1.38629	2.36713	1.38629	1.99606	1.86479	1.87465	1.84583	1.94591	2.4108	1.91692	1.90617	1.83023	2.65926	2.0149	2.30259	5.18018	5.18659	5.21649	2.38482	2.28011	2.83773
Retrotransposon	LTR	Gypsy	Gypsy	Gypsy-40_PAb-I_plnrep	0	0	0	1.28093	1.38629	1.91692	0.916291	1.09861	1.16315	1.18958	0.860203	1.52606	1.81118	1.76235	1.33977	6.69244	6.64954	6.66006	1.71765	1.33977	0.965081	6.70804	6.70652	6.70812	0	0.693147	0	1.4816	1.87877	0.693147
Retrotransposon	LTR	Gypsy	Gypsy	Gypsy-40_PAb-LTR_plnrep	0.693147	0	0	0	0.693147	0.693147	0.693147	0.693147	0.693147	0	0	0.693147	1.38629	0.693147	1.38629	8.62666	8.57056	8.59779	0	1.38629	0.875469	8.50849	8.515	8.5023	0	0.693147	0.693147	0	0.693147	0
Retrotransposon	LTR	Gypsy	Gypsy	Gypsy-41_BRa-I_edcotrep	2.37491	2.22708	2.06263	1.41227	1.32176	1.09861	2.65676	1.96611	2.10354	1.63761	1.77071	2.19722	4.71456	4.64257	5.33902	1.27123	1.51413	1.22595	1.90056	1.97202	2.37601	2.012	1.73114	1.335	0	0.693147	0	1.92181	1.39937	1.81011
Retrotransposon	LTR	Gypsy	Gypsy	Gypsy-41_DAn-I_invrep	1.504077397	1.913649615	2.809402695	2.385700306	3.433987204	2.76361735	1.694594904	1.752538623	1.985914895	6.213807778	2.602689685	1.945910149	6.157171764	5.919662376	6.001414878	1.504077397	0	0	1.4663363	1.609437912	1.435084525	2.041983674	2.090741209	1.4663363	1.504077397	1.609437912	1.540445755	3.036552668	2.76000994	2.721295428
Retrotransposon	LTR	Gypsy	Gypsy	Gypsy-41_Mad-I_edcotrep	3.08568	2.9866	2.86052	5.12793	4.88497	4.86185	2.26665	2.44235	2.49527	1.88839	3.30505	2.01045	2.32834	2.42775	2.69687	0.693147	0.693147	0.875469	4.19198	3.90257	4.99946	0	0.961409	0	6.29527	5.98708	6.2661	1.06784	1.37103	2.164
Retrotransposon	LTR	Gypsy	Gypsy	Gypsy-41_PAb-I_plnrep	4.90011	4.89393	4.90067	4.51531	4.43834	4.43816	4.49768	4.49845	4.56593	5.4243	5.94997	5.91829	5.13798	5.19141	5.17397	6.51115	6.45133	6.48841	5.07019	5.01776	5.09285	6.48867	6.46075	6.46643	1.14513	1.60944	1.94591	4.45578	4.40324	4.43608
Retrotransposon	LTR	Gypsy	Gypsy	Gypsy-41_PAb-LTR_plnrep	0	0	0	0	0	0	0	0	0	0	0	0	0	0	0	6.5357	6.46758	6.49844	0	0	0	6.71999	6.69713	6.713	0	0.693147	0	0	0	0
Retrotransposon	LTR	Gypsy	Gypsy	Gypsy-41_SB-I_grasrep	3.2581	3.82864	2.85263	2.00882	2.07944	2.40794	3.44734	1.84733	3.0944	2.79728	1.77716	2.21723	4.79165	4.77316	4.75589	3.19458	2.8962	3.42589	3.00743	2.82601	2.67069	3.27504	3.23868	3.56825	5.48819	4.92029	4.67749	2.23359	2.12823	2.14458
Retrotransposon	LTR	Gypsy	Gypsy	Gypsy-42_GM-I_edcotrep	1.098612289	0	0	4.709530201	5.099866428	5.238211673	0	1.098612289	0	1.098612289	1.609437912	1.421386371	1.791759469	1.098612289	0	1.609437912	0	1.299283893	1.098612289	1.098612289	1.098612289	1.252762968	1.098612289	1.315676062	1.098612289	1.098612289	0	1.945910149	1.098612289	1.4663363
Retrotransposon	LTR	Gypsy	Gypsy	Gypsy-42_Mad-I_edcotrep	1.5089	1.12847	1.66393	6.09323	6.26786	6.06568	1.70475	1.54045	2.26176	1.02962	1.93486	1.58412	2.86388	3.09104	3.50656	2.73725	2.40794	2.35138	1.06784	2.45674	0.693147	2.3979	1.8045	1.38629	3.83298	3.85862	3.87339	3.71357	3.62567	3.74532
Retrotransposon	LTR	Gypsy	Gypsy	Gypsy-42_PAb-I_plnrep	3.17205	3.20883	3.28802	4.92271	4.85723	4.89507	5.97309	5.9819	6.01109	5.30604	5.41788	5.39791	3.7092	3.6733	3.75017	8.49974	8.47765	8.48482	6.02871	6.03661	6.03717	8.47599	8.47406	8.47686	0.770108	0.997635	1.69735	4.56645	4.55426	4.56969
Retrotransposon	LTR	Gypsy	Gypsy	Gypsy-42_PAb-LTR_plnrep	0	0	0	0	0.693147	0	3.35185	3.06027	2.96398	2.56946	3.35574	3.3322	0.980831	1.12847	0	8.32747	8.32656	8.31156	3.60846	3.61989	3.65498	7.77104	7.77993	7.75696	0	0	0	3.44714	3.35515	3.208
Retrotransposon	LTR	Gypsy	Gypsy	Gypsy-42_SB-I_grasrep	0	0.693147	0.693147	1.70475	0.693147	0.980831	0.693147	1.38629	0.693147	0.693147	1.38629	0.693147	6.20501	6.16891	6.03867	2.62756	2.32146	2.55273	0	0.693147	0	2.52721	2.8962	2.46549	1.79176	1.23214	0.693147	1.45299	1.52939	1.30833
Retrotransposon	LTR	Gypsy	Gypsy	Gypsy-43_GM-I_edcotrep	1.098612289	1.098612289	1.32175584	1.098612289	1.098612289	0	1.098612289	1.252762968	1.098612289	1.386294361	1.386294361	1.386294361	2.46548595	2.895409049	2.356652735	3.33544568	3.424011809	3.923951576	0	0	0	5.37897527	5.493061443	5.51504035	1.098612289	1.098612289	0	2.549445171	2.371578364	2.917770732
Retrotransposon	LTR	Gypsy	Gypsy	Gypsy-43_PAb-I_plnrep	5.54809	5.61936	5.58222	3.84035	3.77721	3.76516	4.33374	4.36618	4.34661	3.79472	4.16713	4.11292	4.71793	4.76222	4.77788	7.24746	7.19096	7.20293	4.68923	4.66402	4.69485	7.23152	7.22071	7.23142	2.53514	3.80495	3.37547	2.63067	2.79581	2.8282
Retrotransposon	LTR	Gypsy	Gypsy	Gypsy-43_PAb-LTR_plnrep	0	0	0	0	0	0	0	0	0	0	0	0	0	0	0	5.71559	5.70836	5.56212	0	0	0	6.45765	6.46886	6.4477	0	0	0	0	0	0
Retrotransposon	LTR	Gypsy	Gypsy	Gypsy-44_BD-I_grasrep	3.22287	3.10395	3.34313	2.91118	2.61239	3.39347	2.86877	2.81145	2.91777	2.90264	3.16035	2.64742	4.99043	4.21951	4.15235	2.45506	2.36462	2.23048	3.28984	3.64921	3.17471	2.92077	2.41215	2.57192	5.34428	5.28538	5.22171	0.693147	1.29392	1.38629
Retrotransposon	LTR	Gypsy	Gypsy	Gypsy-44_MLP-I_fngrep	6.261703494	6.584331342	5.908082938	1.098612289	1.299283893	1.252762968	1.098612289	0	1.098612289	0	1.098612289	0	0	1.098612289	1.386294361	0	1.609437912	1.098612289	0	1.098612289	1.098612289	1.609437912	1.098612289	1.386294361	1.349925976	0	0	1.098612289	1.098612289	1.098612289
Retrotransposon	LTR	Gypsy	Gypsy	Gypsy-44_PAb-I_plnrep	4.59888	4.70204	4.72633	5.87467	6.00122	6.15603	4.76128	4.66089	4.66966	5.17133	5.18454	5.14647	5.28314	5.1726	5.23317	6.6607	6.62508	6.63889	4.89003	4.78317	4.74624	6.64742	6.6445	6.64464	3.91202	3.67883	3.87812	5.8646	5.83587	5.8683
Retrotransposon	LTR	Gypsy	Gypsy	Gypsy-44_PAb-LTR_plnrep	0	0	0	0	0	0	0	0	0	0	0	0	0	0	0	6.96234	6.90744	6.94735	0	0	0	6.99306	6.99026	6.97218	0.693147	0	0	0	0	0
Retrotransposon	LTR	Gypsy	Gypsy	Gypsy-45_PAb-I_plnrep	6.52595	6.39968	6.40735	3.61691	3.56134	3.68992	4.29801	4.20419	4.19888	4.28067	4.2528	4.17271	5.88602	5.96832	6.0599	7.35813	7.45393	7.32389	4.41299	4.41543	4.45122	8.06153	8.05927	8.04782	3.50563	3.00678	3.73529	3.97122	4.05069	3.96571
Retrotransposon	LTR	Gypsy	Gypsy	Gypsy-46_CQ-I_invrep	1.299283893	1.536234762	1.386294361	1.504077397	1.098612289	1.098612289	1.516348465	1.098612289	1.609437912	1.280933845	1.098612289	1.386294361	5.011967739	4.110873864	4.460144414	0	0	0	0	1.098612289	1.098612289	1.098612289	1.098612289	1.280933845	1.098612289	1.098612289	1.098612289	1.349925976	1.223775432	1.386294361
Retrotransposon	LTR	Gypsy	Gypsy	Gypsy-46_PAb-I_plnrep	3.22087	3.12688	3.30459	4.85047	4.65265	4.83266	3.81176	3.9733	3.89849	3.89545	3.81536	3.8882	4.11209	4.11979	4.14897	6.65992	6.63998	6.65769	4.30347	4.32913	4.28869	6.79175	6.79355	6.79426	5.1006	5.15161	4.71738	4.96668	4.97429	4.98757
Retrotransposon	LTR	Gypsy	Gypsy	Gypsy-46_PAb-LTR_plnrep	0	0	0	0	0	0	1.29928	0	0.693147	0	0	0	6.49137	6.58938	6.57693	7.95234	7.9	7.9596	0	0	0.693147	8.30869	8.32116	8.29535	0	0	0	1.38629	0	0
Retrotransposon	LTR	Gypsy	Gypsy	Gypsy-46_PIT-I_plnrep	0	0	0	5.97126184	5.938854597	5.913503006	0	1.945910149	0	0	0	0	0	0	0	0	1.098612289	0	0	1.098612289	0	0	1.098612289	0	0	1.609437912	1.098612289	2.674148649	3.295836866	2.48490665
Retrotransposon	LTR	Gypsy	Gypsy	Gypsy-46_STu-I_edcotrep	0	0	0	0	0	0	4.07187	4.29501	4.07187	0	0	0	0	0	0	0	0	0	5.06049	5.03261	4.91755	0	0	0	0	0	0	0	0	0
Retrotransposon	LTR	Gypsy	Gypsy	Gypsy-47_Mad-I_edcotrep	5.55151	5.43056	5.51603	3.14499	3.46413	3.57555	3.10472	3.00285	2.91476	2.37158	2.85862	3.48191	3.12218	3.34887	3.74163	0.693147	0	0.693147	1.52939	1.38629	1.83525	1.28093	1.24319	1.09861	3.51651	2.75957	2.83973	3.49161	3.13839	3.22308
Retrotransposon	LTR	Gypsy	Gypsy	Gypsy-47_MLP-I_fungi	0	0	0	0	0.693147	0.693147	3.83277	4.483	3.92593	3.04732	3.94158	3.74132	0.693147	1.82161	1.38629	0	0.693147	0	5.19666	4.46973	4.29151	0.693147	0.693147	0.693147	0	0	0	1.55814	1.65456	1.54045
Retrotransposon	LTR	Gypsy	Gypsy	Gypsy-47_PAb-I_plnrep	6.28	6.30174	6.25633	3.91609	3.77624	3.97656	4.50938	4.54518	4.52924	4.52689	4.70731	4.75582	5.14089	5.18365	5.11669	7.69498	7.65642	7.66809	4.76059	4.73961	4.74778	7.85709	7.85838	7.85613	1.57351	2.1523	1.82033	3.27171	3.19145	3.29732
Retrotransposon	LTR	Gypsy	Gypsy	Gypsy-47_PAb-LTR_plnrep	0	0	0	0	0	0	0	0	0	0	0	0	0	0	0	6.16672	6.13428	6.16256	0	0	0	6.49964	6.51905	6.49974	0	0	0	0	0	0
Retrotransposon	LTR	Gypsy	Gypsy	Gypsy-47_STu-I_edcotrep	2.5337	2.42154	2.31206	4.48864	4.10677	4.20002	5.1604	5.18038	5.37354	2.62391	1.72804	1.87692	3.23317	3.49987	3.24194	0.693147	1.06471	0.693147	4.2818	4.52863	4.46207	0	0.955511	0.693147	3.77717	3.51076	3.60336	3.91452	3.38731	3.47053
Retrotransposon	LTR	Gypsy	Gypsy	Gypsy-48_PAb-I_plnrep	0.916291	0	0	1.38629	0.693147	0	2.79321	2.62104	2.76293	2.63906	3.09104	3.4012	2.75154	3.26903	3.63004	7.60293	7.54982	7.57274	3.23212	3.3322	3.4012	7.61498	7.60538	7.60787	0	0	0.693147	0	0	0
Retrotransposon	LTR	Gypsy	Gypsy	Gypsy-48_PAb-LTR_plnrep	0.693147	0	0	0	0	0.693147	1.6864	1.4816	1.0033	2.1848	2.69463	2.97738	0.980831	0.693147	0.693147	8.70145	8.66418	8.67675	1.79176	1.76359	1.79176	8.63984	8.64354	8.63744	0.693147	0.693147	0.693147	1.77777	2.45674	2.93964
Retrotransposon	LTR	Gypsy	Gypsy	Gypsy-48_SB-I_grasrep	1.38629	1.89712	0	3.0114	3.16515	3.11863	4.52721	4.55913	4.66344	0	0.693147	0.693147	1.42139	0.693147	0	3.67946	2.82138	3.45121	5.70948	5.47017	4.84841	3.00238	2.91037	2.82138	0	0	0	1.65456	1.62924	1.71765
Retrotransposon	LTR	Gypsy	Gypsy	Gypsy-49_Mad-I_edcotrep	3.21377	3.13405	3.23311	4.09142	4.05991	3.90924	4.79024	4.86808	4.82316	4.0139	3.94814	4.01627	4.12479	3.95124	4.20469	4.34812	4.18481	4.15235	4.7304	4.71387	4.81	4.61039	4.65265	4.33139	6.31642	6.19419	6.14932	4.39794	4.38709	4.26067
Retrotransposon	LTR	Gypsy	Gypsy	Gypsy-49_PAb-I_plnrep	4.25348	4.70536	4.71277	3.95913	3.63019	3.7708	4.5619	4.60377	4.56811	4.98721	5.53802	5.53307	5.28019	5.33222	5.26572	7.73819	7.70926	7.72047	4.96633	4.95297	4.94539	7.49074	7.4922	7.49017	3.22251	2.09186	2.48491	5.86429	5.81298	5.87595
Retrotransposon	LTR	Gypsy	Gypsy	Gypsy-49_PAb-LTR_plnrep	0	0	0.693147	0	0.693147	0	0	0	0	0.693147	0.693147	0	2.4681	2.56495	1.94591	8.39886	8.37237	8.38461	0	0	0	8.28464	8.29465	8.29139	0	0	0	6.76553	6.71313	6.7093
Retrotransposon	LTR	Gypsy	Gypsy	Gypsy-49_SB-I_grasrep	1.20397	1.43759	1.96611	2.47201	1.97716	2.22938	5.44032	5.37589	5.42821	3.07731	2.56307	2.90732	1.98707	1.86872	1.49752	0.693147	1.65456	0.693147	5.92959	5.88627	6.24357	1.62113	1.3633	1.90617	0	0	0	2.04307	1.54756	1.07881
Retrotransposon	LTR	Gypsy	Gypsy	Gypsy-5_ACe-I_invrep	1.945910149	1.945910149	1.945910149	1.871802177	2.737246478	2.833213344	1.76766143	1.098612289	1.504077397	1.098612289	1.098612289	1.098612289	1.791759469	1.265665091	1.098612289	1.871802177	1.778856584	1.637609345	0	1.098612289	1.098612289	4.573236696	4.991792206	5.392977335	1.098612289	1.563976003	1.512587747	1.098612289	1.098612289	1.098612289
Retrotransposon	LTR	Gypsy	Gypsy	Gypsy-5_ALY-I_edcotrep	1.098612289	0	1.098612289	1.098612289	1.098612289	2.397895273	1.098612289	1.098612289	1.335001067	0	0	1.098612289	5.48272009	5.122337658	4.916082827	1.098612289	1.098612289	1.098612289	0	1.435084525	0	1.098612289	1.299283893	1.178654996	0	0	1.098612289	1.435084525	0	1.098612289
Retrotransposon	LTR	Gypsy	Gypsy	Gypsy-5_DFi-I_invrep	0	0	0	1.609437912	1.098612289	1.098612289	0	0	1.098612289	1.098612289	1.098612289	1.098612289	1.098612289	1.098612289	1.098612289	0	1.098612289	1.098612289	0	1.098612289	0	5.872117789	4.844187086	5.18178355	1.504077397	1.609437912	1.098612289	1.098612289	1.098612289	0
Retrotransposon	LTR	Gypsy	Gypsy	Gypsy-5_DKi-I_invrep	3.04085	3.89182	3.94481	2.30259	2.72458	2.67031	5.11199	4.98208	5.13971	4.89784	5.6759	5.5417	3.78419	3.49987	3.68888	1.79176	2.30259	2.07944	4.4128	4.11994	4.20965	2.62306	2.63906	2.74442	0	0.693147	0.693147	2.53898	2.74084	2.48491
Retrotransposon	LTR	Gypsy	Gypsy	Gypsy-5_FV-I_edcotrep	3.33042	3.18762	3.26151	5.05264	4.43489	4.6226	4.31303	4.0143	4.33073	3.10168	3.13425	3.02529	3.30973	3.32103	3.49114	3.97452	4.07486	4.20469	4.77068	4.50152	4.64796	4.11354	4.08674	4.10639	3.4315	3.06027	3.00048	4.90897	4.96377	5.13203
Retrotransposon	LTR	Gypsy	Gypsy	Gypsy-5_PAb-I_plnrep	5.2738	5.2296	5.22119	3.04452	3.2906	3.37693	4.24016	4.15796	4.26691	4.13457	4.39344	4.4179	4.72848	4.74555	4.69693	7.31737	7.24666	7.2758	4.66676	4.62564	4.64622	7.3678	7.36838	7.35629	1.65563	1.98513	1.8777	2.97393	2.90946	2.96527
Retrotransposon	LTR	Gypsy	Gypsy	Gypsy-5_PAb-LTR_plnrep	0	0	0	0	0	0	0	0	0	0	0	0	0	0	0	4.54922	4.42061	4.42172	0	0	0	5.39804	5.35724	5.33433	0	0	0	0	0	0
Retrotransposon	LTR	Gypsy	Gypsy	Gypsy-5_Pru-I_edcotrep	0	1.58045	1.38629	3.89718	4.30792	4.08957	3.22684	3.6055	2.74442	4.36945	4.47961	5.01285	1.93634	1.79176	2.11223	1.06087	1.14513	1.58045	2.70805	2.56495	1.42712	1.4816	0.693147	1.79176	6.00952	5.99043	6.06085	0.884201	0.944462	1.58697
Retrotransposon	LTR	Gypsy	Gypsy	Gypsy-5_RO-I_fungi	5.78758	5.17803	5.56475	4.40296	4.97969	4.38559	5.10796	5.05625	4.8924	4.21497	3.86523	6.23385	5.05836	4.60849	5.11418	4.39621	4.12961	5.14916	5.19111	5.32638	4.98677	3.86223	4.92518	4.76095	5.31894	5.66395	5.10393	4.83855	5.15081	4.50535
Retrotransposon	LTR	Gypsy	Gypsy	Gypsy-5_TC-I_edcotrep	2.952501129	3.218875825	3.295836866	1.098612289	1.098612289	1.299283893	1.791759469	1.369486395	1.265665091	1.510591688	1.609437912	1.098612289	6.464730038	6.053748967	6.172483172	2.588342815	2.772588722	2.608841097	1.583293096	1.512587747	2.008824584	2.910174385	2.743320815	2.791165108	2.726917751	2.908719078	2.708050201	1.810108426	1.945910149	1.928960163
Retrotransposon	LTR	Gypsy	Gypsy	Gypsy-5-I_HM_invrep	5.244389025	4.207673248	4.623569869	3.198673118	2.669212348	2.944438979	0	1.098612289	1.609437912	0	1.098612289	1.098612289	2.824771933	3.166626284	3.656209041	0	1.098612289	0	0	0	0	1.098612289	1.098612289	1.386294361	1.098612289	0	0	1.098612289	0	1.32175584
Retrotransposon	LTR	Gypsy	Gypsy	Gypsy-50_GA-I_vrtrep	3.09104	1.92529	3.21314	1.64866	2.48491	1.29928	4.75045	4.97485	5.48756	1.38629	0.693147	0.693147	0	1.28093	0.693147	0.693147	0	0.693147	3.92287	4.44656	4.29501	0	0	0	4.7185	4.74119	4.76217	1.14513	1.20397	0.693147
Retrotransposon	LTR	Gypsy	Gypsy	Gypsy-50_PAb-I_plnrep	2.82644	2.58144	2.82804	3.57158	3.58049	3.26736	4.01193	4.08464	4.11328	3.77934	4.00461	3.96797	4.1439	4.17872	4.13954	7.34958	7.33117	7.32695	4.27708	4.24767	4.43719	7.37772	7.38385	7.37353	1.89956	1.93076	1.49252	4.52275	4.51984	4.57814
Retrotransposon	LTR	Gypsy	Gypsy	Gypsy-50_PAb-LTR_plnrep	0	0	0	0	0	0	0	0	0	0	0	0	0	0	0	4.36945	4.2017	4.15261	0	0	0	5.53497	5.67401	5.66988	0	0	0	0	0	0
Retrotransposon	LTR	Gypsy	Gypsy	Gypsy-51_PAb-I_plnrep	3.46574	3.43105	3.36236	5.00362	4.96068	4.95055	4.30901	4.29101	4.31515	4.39949	4.35589	4.35649	4.12667	4.05246	4.05851	5.57389	5.51754	5.52549	4.24688	4.24258	4.24079	5.49809	5.49301	5.51508	4.88204	5.02242	4.92041	6.26098	6.25181	6.23786
Retrotransposon	LTR	Gypsy	Gypsy	Gypsy-51_PAb-LTR_plnrep	0	0	0.693147	0	0	0	0.693147	0.693147	0	0	0	0	3.97119	3.94573	4.03842	5.99052	5.9538	5.97579	1.38629	0	1.38629	5.99573	5.99865	6.03988	0	0	0	4.93157	4.92673	4.92414
Retrotransposon	LTR	Gypsy	Gypsy	Gypsy-51_SB-I_grasrep	2.10542	1.72924	1.77886	1.48473	1.10866	1.83258	2.06654	2.00533	1.86008	1.69459	1.62746	1.39872	5.6323	5.54388	5.45257	1.29614	1.04455	1.25276	2.15756	1.98929	1.70475	1.72924	1.80915	1.7492	2.42037	3.09104	2.42037	1.7346	2.20133	1.66073
Retrotransposon	LTR	Gypsy	Gypsy	Gypsy-52_BD-I_grasrep	2.58499	2.42154	2.5965	5.16605	4.79224	4.67829	4.5577	4.2632	4.74348	3.45104	4.46973	4.04305	4.47993	4.33987	4.28915	1.82455	2.55793	2.01692	5.06144	4.47734	4.39136	2.96871	2.62104	2.20728	5.46759	5.59471	5.34922	4.21591	4.29898	4.41505
Retrotransposon	LTR	Gypsy	Gypsy	Gypsy-52_PAb-I_plnrep	5.09832	5.06631	5.01354	4.171	4.18286	4.36432	4.28223	4.35594	4.27548	5.2575	5.90472	5.87694	5.00698	4.98709	5.09468	7.21845	7.16835	7.18713	4.7482	4.70423	4.6471	7.39354	7.38875	7.38523	3.9031	3.75582	3.59457	4.6064	4.61019	4.53717
Retrotransposon	LTR	Gypsy	Gypsy	Gypsy-52_PAb-LTR_plnrep	0	0	1.098612289	0	0	0	0	0	0	0	0	0	0	0	0	7.064075033	6.830226076	6.825170092	0	0	0	6.934718483	6.89121931	6.869845706	0	0	0	0	0	0
Retrotransposon	LTR	Gypsy	Gypsy	Gypsy-53_DWil-I_invrep	0	0	0	1.89712	2.94444	2.30259	4.8828	4.64439	5.12132	4.76691	4.48739	4.34751	2.69463	1.90617	2.13351	1.82813	1.20397	1.63761	6.18785	6.39433	6.3087	2.25129	1.99243	0	1.92529	1.25276	0.980831	2.5177	2.41591	2.48491
Retrotransposon	LTR	Gypsy	Gypsy	Gypsy-53_GM-I_edcotrep	2.69988	2.42501	2.73003	3.73426	3.3301	3.70081	3.63319	3.50322	3.62878	2.97893	2.63906	1.52243	2.10843	2.61844	2.14658	4.10099	3.67533	3.7175	2.98184	3.90585	3.63231	4.09434	3.64766	3.93947	5.77017	5.71373	5.60313	2.39181	2.01934	1.89712
Retrotransposon	LTR	Gypsy	Gypsy	Gypsy-53_PAb-I_plnrep	2.73247	2.8467	2.75519	4.69738	4.49568	4.55787	4.61868	4.4819	4.44698	4.35344	4.38744	4.34939	3.54717	3.63249	3.63391	6.27653	6.23835	6.26675	4.41558	4.4232	4.3584	6.15825	6.14983	6.15014	2.81661	2.84754	2.62895	5.58772	5.57649	5.59027
Retrotransposon	LTR	Gypsy	Gypsy	Gypsy-53_PAb-LTR_plnrep	0	0	0	0	1.38629	0	0.693147	0.693147	0.693147	0	0	0	1.5329	2.22605	1.90298	6.11117	6.08982	6.12707	0.693147	0	0	6.02018	6.02932	6.0217	0	0.693147	0	4.21426	4.23513	4.20146
Retrotransposon	LTR	Gypsy	Gypsy	Gypsy-54_CQ-I_invrep	0	1.098612289	0	0	0	0	0	0	0	0	0	0	0	0	0	0	1.098612289	1.098612289	0	0	0	5.96870756	5.926926026	5.948034989	0	0	0	0	1.098612289	0
Retrotransposon	LTR	Gypsy	Gypsy	Gypsy-54_GM-LTR_edcotrep	5.71291	5.46665	5.70674	4.09804	4.26424	4.22926	4.85723	5.08914	4.82028	3.14988	3.83483	4.4128	4.23618	4.14086	4.00733	0	0.693147	0	2.12823	1.84583	1.74297	2.11453	1.83828	1.64866	3.34236	3.09104	3.09104	5.01801	5.1565	4.92403
Retrotransposon	LTR	Gypsy	Gypsy	Gypsy-54_PAb-I_plnrep	3.05468	3.2988	3.1511	4.57613	4.56276	4.64525	4.08522	4.13425	4.19283	4.24737	4.68855	4.63844	5.80004	5.80447	5.78893	7.77384	7.75428	7.75431	4.15546	4.12675	4.10517	7.79337	7.79326	7.79596	2.73767	3.26432	2.49281	6.4697	6.41833	6.41592
Retrotransposon	LTR	Gypsy	Gypsy	Gypsy-54_PAb-LTR_plnrep	0	0	0.693147	0	0	0	0	0	0	0	0	0.693147	0	0	0	7.82132	7.76061	7.80684	0	0	0	7.91774	7.93578	7.92442	0	0	0.693147	0	0	0
Retrotransposon	LTR	Gypsy	Gypsy	Gypsy-55_CGi-I_invrep	2.02228	2.45893	2.40794	1.3622	0.897943	1.38629	2.23359	2.14843	1.36609	0.693147	1.04982	0.893816	6.08728	6.07815	6.01724	2.77259	2.77259	2.32456	1.89712	0.693147	0.693147	1.20397	1.27297	0	1.34373	0.693147	0.693147	5.69751	5.77248	5.74483
Retrotransposon	LTR	Gypsy	Gypsy	Gypsy-55_PAb-I_plnrep	3.51498	3.61942	3.59807	3.60636	3.55814	3.52366	4.48752	4.42655	4.4526	4.96658	4.98621	4.97392	4.35245	4.31427	4.36752	6.13968	6.06467	6.11315	4.65586	4.503	4.61014	6.18156	6.1742	6.18518	4.63683	4.77068	4.64679	5.1079	5.1569	5.14667
Retrotransposon	LTR	Gypsy	Gypsy	Gypsy-55_PAb-LTR_plnrep	0	0	0	0	0	0	0	0	0	1.098612289	0	0	0	0	0	6.274140359	6.082168681	6.06705196	0	0	0	5.947172999	5.887050805	5.938954724	0	0	1.098612289	0	0	0
Retrotransposon	LTR	Gypsy	Gypsy	Gypsy-56_MLP-I_fngrep	1.272966076	1.098612289	1.098612289	0	0	0	1.098612289	1.098612289	1.098612289	1.098612289	1.098612289	0	5.187385806	4.887337078	5.342334252	0	1.232143265	1.62924054	1.098612289	1.098612289	0	1.34117408	1.34117408	1.098612289	1.098612289	0	0	2.079441542	1.717651753	1.098612289
Retrotransposon	LTR	Gypsy	Gypsy	Gypsy-56_PAb-I_plnrep	1.609437912	1.450010669	1.272966076	1.734601644	1.651402933	1.765092033	2.823869829	2.885007395	2.769628094	3.045493395	3.242068777	3.180089257	4.6929063	4.661077818	4.658587723	6.936391326	6.933997909	6.878093691	2.649347065	2.745114745	2.769628094	6.5966135	6.599851451	6.615913902	3.512330205	3.383712067	3.424728344	4.583385616	4.566856501	4.549179561
Retrotransposon	LTR	Gypsy	Gypsy	Gypsy-56_PAb-LTR_plnrep	0	0	1.098612289	0	0	0	0	0	1.488076733	2.151762203	2.251291799	0	1.791759469	1.945910149	1.99242971	8.132230466	8.24439185	8.226701843	1.098612289	0	1.098612289	7.897660719	7.881076417	7.909364623	1.098612289	0	0	1.098612289	1.098612289	0
Retrotransposon	LTR	Gypsy	Gypsy	Gypsy-57_BG-I_fngrep	1.752538623	1.887069649	2.344549155	1.554628972	1.996554376	1.815290432	0	1.098612289	1.609437912	1.763588021	1.575535671	1.280933845	1.745238977	1.32175584	1.658228077	2.48490665	2.335374593	2.32238772	0	1.386294361	1.098612289	2.25878262	2.63905733	2.21557408	5.618224586	5.555282466	5.726124359	3.302547632	3.210843653	3.061688539
Retrotransposon	LTR	Gypsy	Gypsy	Gypsy-57_CCri-I_plnrep	0	0	0	0	0	0	5.13384	5.19111	5.17615	0.693147	0	0.693147	0	0	0	0	0	0	5.34869	5.18739	5.32463	0	0	0	0	0	0	0	0	0
Retrotransposon	LTR	Gypsy	Gypsy	Gypsy-57_PAb-I_plnrep	3.10234	2.82541	3.18572	4.42786	4.42056	4.43812	4.73854	4.77935	4.75914	4.14894	4.19944	4.19235	4.49099	4.38465	4.43239	7.22713	7.19854	7.19926	4.50645	4.59642	4.43546	7.35738	7.34241	7.34994	2.70805	2.78849	3.07885	4.75369	4.77663	4.80407
Retrotransposon	LTR	Gypsy	Gypsy	Gypsy-57_PAb-LTR_plnrep	0	0	0	0	0	0	0	0	0	0	0	0	0	0	0	6.88312134	6.916447393	6.87268028	0	0	0	6.528640433	6.581932337	6.449416154	0	0	0	0	0	0
Retrotransposon	LTR	Gypsy	Gypsy	Gypsy-58_PAb-I_plnrep	4.66213	4.96341	4.92237	4.57353	4.55255	4.56376	6.40108	6.43614	6.40899	6.16913	6.20782	6.20359	5.73863	5.74163	5.74304	7.85833	7.81759	7.82829	6.4847	6.45873	6.46768	8.00879	8.01384	8.01427	4.57598	4.63951	4.28461	5.24633	5.2903	5.30769
Retrotransposon	LTR	Gypsy	Gypsy	Gypsy-58_PAb-LTR_plnrep	0	0	0	0	0.693147	0.693147	6.05282	6.15173	6.1104	5.20401	5.91162	5.61419	6.62274	6.13816	6.81235	7.49332	7.45314	7.47617	6.44666	6.06912	6.43636	7.79766	7.79431	7.79235	0.693147	0.839751	0	1.73769	2.41591	2.87795
Retrotransposon	LTR	Gypsy	Gypsy	Gypsy-59_CQ-I_invrep	5.42357	5.15349	5.06872	4.65396	3.9224	3.96731	4.24532	4.10574	4.45679	4.0377	3.76331	5.26886	4.16753	4.65301	4.58035	4.69064	4.05352	4.56924	4.81939	4.24058	4.26736	3.53907	4.11451	4.00733	5.01948	4.52679	5.10508	3.83874	4.72358	4.32303
Retrotransposon	LTR	Gypsy	Gypsy	Gypsy-59_GM-I_edcotrep	1.38629	1.81708	1.29928	0.693147	0.693147	0	1.79176	1.90617	1.38629	1.09861	0.693147	0.693147	5.08474	5.01948	4.96284	2.28011	2.67415	3.09104	1.99243	1.60944	1.38629	2.70805	2.72458	1.67398	0	0	0	1.2164	1.0116	2.07944
Retrotransposon	LTR	Gypsy	Gypsy	Gypsy-59_PAb-I_plnrep	2.236139688	1.8059434	1.841239871	2.234265566	2.356222538	2.754278356	1.801292221	1.889645118	1.838541269	2.997126301	3.374096789	3.370686626	3.840625817	3.973913649	3.964575607	8.226003642	8.071811928	8.032665395	2.159971438	2.125444492	1.962014068	7.664862689	7.661428253	7.652051744	3.208825489	3.534349119	3.133561915	3.36891865	3.321623731	3.31328014
Retrotransposon	LTR	Gypsy	Gypsy	Gypsy-59_PAb-LTR_plnrep	1.504077397	1.098612289	2.197224577	1.098612289	0	0	1.098612289	1.871802177	1.609437912	1.945910149	0	0	0	0	0	7.309446609	7.538021231	7.392284154	0	1.098612289	0	6.686763162	6.681005232	6.65336097	1.609437912	1.098612289	1.098612289	0	1.098612289	1.098612289
Retrotransposon	LTR	Gypsy	Gypsy	Gypsy-6_AEc-LTR_invrep	5.33929	5.64505	5.66296	5.86867	5.68358	5.89715	3.7612	3.98072	3.6763	4.59368	5.09987	5.01801	3.50405	3.42589	3.18727	4.53618	4.5314	4.75574	3.86656	3.40858	3.57733	4.87061	5.13243	4.9914	2.92162	2.93119	3.054	4.68951	4.75531	4.98086
Retrotransposon	LTR	Gypsy	Gypsy	Gypsy-6_BG-I_fngrep	2.627078729	2.908719078	2.65089414	0	0	1.098612289	1.098612289	1.504077397	1.609437912	2.803360381	1.704748092	1.791759469	1.904238091	2.302585093	2.155981198	4.67622493	4.767858601	4.885321473	1.098612289	1.098612289	1.098612289	4.804766668	5.021245473	4.386621064	1.349925976	1.098612289	2.197224577	3.349904087	2.442347035	2.268683886
Retrotransposon	LTR	Gypsy	Gypsy	Gypsy-6_CGi-I_invrep	0	0	0	6.00224	5.97889	6.01453	2.89037	3.16407	2.85263	3.1209	2.22708	3.24259	0	0.693147	1.38629	0.693147	1.60944	0	0.693147	1.94591	2.15948	1.20397	1.38629	0	0.693147	0	0	1.38629	0	0
Retrotransposon	LTR	Gypsy	Gypsy	Gypsy-6_CP-I_edcotrep	4.66483	4.72002	4.85493	5.30729	5.51721	5.49239	4.1464	3.81299	3.91858	4.7444	5.11615	4.68478	4.53002	4.52448	4.58072	4.57458	4.53571	4.66788	4.01285	3.69999	3.78471	4.88321	4.84618	4.79609	3.68234	3.67419	3.76357	4.57205	4.5487	4.59124
Retrotransposon	LTR	Gypsy	Gypsy	Gypsy-6_DPu-I_invrep	3.44999	3.51155	3.33768	1.52606	1.5235	1.35455	1.58045	0	1.23214	0	1.38629	0.693147	0.693147	1.38629	2.30259	2.51023	3.63099	3.51898	1.14513	1.26369	1.14513	3.2581	2.10191	2.75317	0.693147	0.693147	0.693147	4.61347	5.09111	5.12736
Retrotransposon	LTR	Gypsy	Gypsy	Gypsy-6_FV-I_edcotrep	1.797489687	1.622683797	1.781907767	2.067271537	2.115930161	2.045539559	1.990035026	1.827350205	1.649984669	2.069780019	2.317852944	2.064327904	5.945588134	5.953134237	6.011539196	3.185740876	3.122994682	3.013655685	2.036882362	2.00148	2.056451791	3.519883713	3.433987204	3.230013569	1.609437912	1.435084525	1.098612289	1.667706821	1.495493998	1.62924054
Retrotransposon	LTR	Gypsy	Gypsy	Gypsy-6_HV-I_subsp.	1.54592	1.71979	2.43612	3.60791	3.70904	3.62244	3.6048	3.14054	3.47639	3.34404	2.99137	3.08568	5.0882	5.10068	5.25974	2.66517	3.47462	2.89037	3.09331	3.32424	3.15522	2.6274	2.64454	2.52362	3.1971	2.92162	3.05804	3.59319	4.59579	3.66516
Retrotransposon	LTR	Gypsy	Gypsy	Gypsy-6_LCh-I_vrtrep	5.77721	5.82051	5.8701	4.33449	4.3002	4.57618	4.34055	4.33449	4.34566	2.80768	4.44097	4.76826	4.06536	4.18096	3.91772	0	0	0.693147	1.91692	2.19722	2.73622	1.79176	0.693147	2.24374	2.41294	2.50844	2.45414	3.90629	4.07025	3.93462
Retrotransposon	LTR	Gypsy	Gypsy	Gypsy-6_PAb-I_plnrep	4.60909	4.57571	4.61141	4.41343	4.52428	4.48685	4.10953	4.08594	4.1144	4.93272	5.68919	5.68301	5.52966	5.54911	5.47099	6.99061	6.93092	6.9512	4.63152	4.55732	4.50438	7.1162	7.11189	7.10945	2.25129	1.54045	1.99243	3.97293	3.99613	3.97132
Retrotransposon	LTR	Gypsy	Gypsy	Gypsy-6_PAb-LTR_plnrep	0	0.693147	0	0	0	0	0	0	0	0	0	0	0	0	0	7.34077	7.31752	7.31773	0	0	0	7.73695	7.73586	7.73615	0	0	0	0.693147	0	0
Retrotransposon	LTR	Gypsy	Gypsy	Gypsy-6_PGr-I_fungi	2.83191	3.15936	3.12055	0	1.69168	0	0	0.693147	1.31219	0	0.693147	0.693147	0.693147	1.38629	0	0.693147	0	0	0	0	0	0.693147	0.693147	0.693147	0.938271	0.693147	0.967584	5.02388	4.33073	4.05699
Retrotransposon	LTR	Gypsy	Gypsy	Gypsy-6_SB-I_grasrep	2.67667	2.87219	2.81224	5.32399	5.26752	5.0981	3.62582	3.63951	3.60812	3.3515	3.52383	3.47442	4.38059	4.50218	4.42967	4.02051	4.14202	4.03424	3.41789	3.60122	3.51747	4.3093	4.41977	4.29462	3.77743	3.79773	3.91663	4.4401	4.47948	4.54421
Retrotransposon	LTR	Gypsy	Gypsy	Gypsy-6_SMo-I_plnrep	3.34286	3.19867	2.80232	3.59044	3.71936	4.445	3.43474	3.51005	3.34671	3.69544	3.97583	3.98589	3.85651	4.12875	3.9573	4.0961	4.11585	3.76452	3.8297	3.8913	3.9503	3.7017	4.38334	4.0463	4.82488	4.48819	5.02607	3.95688	4.51525	4.38602
Retrotransposon	LTR	Gypsy	Gypsy	Gypsy-6_TC-I_edcotrep	4.94296	4.46307	4.63754	2.93838	2.65459	3.32597	5.66166	5.72533	6.01811	5.73933	5.17133	5.16413	3.07941	2.93755	3.08274	3.21047	2.9473	3.1407	5.76179	5.79836	5.68895	3.04958	3.10781	3.07137	4.82928	4.72543	4.62575	4.65309	4.54329	4.71158
Retrotransposon	LTR	Gypsy	Gypsy	Gypsy-60_PAb-I_plnrep	2.80611	2.89959	2.52721	3.32304	3.31203	3.32977	5.00475	5.01396	5.02952	3.92093	4.29095	4.27839	6.34575	6.38712	6.38718	7.74637	7.69632	7.7197	5.30498	5.29332	5.3096	7.924	7.92756	7.92591	0	0.693147	0.693147	5.64758	5.59949	5.60632
Retrotransposon	LTR	Gypsy	Gypsy	Gypsy-60_PAb-LTR_plnrep	0	0	0.693147	0	0	0	0	0	0	0	0	0	2.83321	2.53898	2.75154	7.87024	7.7977	7.81722	0	0	0	7.91321	7.9136	7.90581	0.693147	0	0	2.14982	1.66255	1.6864
Retrotransposon	LTR	Gypsy	Gypsy	Gypsy-61_PAb-I_plnrep	4.65649	4.67587	4.53692	3.33308	3.54818	3.41384	4.12154	4.06318	4.0726	3.96021	4.15663	4.07499	3.85421	3.90715	3.88054	7.47612	7.43393	7.44616	4.28565	4.24322	4.24991	7.61028	7.61044	7.61568	2.4108	2.55305	2.35259	3.28373	3.24336	3.34476
Retrotransposon	LTR	Gypsy	Gypsy	Gypsy-61_PAb-LTR_plnrep	0	0	0	0	0.693147	0	0	0	0	0	0	0	0	0	0	6.229	6.20176	6.23232	0	0	0	6.57098	6.52777	6.57033	0.693147	0	0	0	0	0
Retrotransposon	LTR	Gypsy	Gypsy	Gypsy-62_DWil-I_invrep	2.182626317	2.420936856	2.806386102	1.704748092	1.481604541	1.782949105	1.920752035	1.500896788	2.10587532	5.274792822	2.324091171	2.487428467	2.104134154	2.061422673	1.99242971	2.397895273	1.265665091	2.040221129	1.838278803	1.609437912	1.817734186	1.811562097	1.701608624	2.1102132	1.474401388	1.801515062	1.670681637	2.044755631	2.01736931	1.855350667
Retrotransposon	LTR	Gypsy	Gypsy	Gypsy-62_PAb-I_plnrep	2.40267	3.09927	2.48491	2.95907	2.79576	3.24657	3.43922	3.53363	3.42532	4.55213	4.90696	4.84327	5.41135	5.30308	5.33535	8.15078	8.11008	8.12749	3.76424	3.74668	3.76174	8.02065	8.01646	8.01768	4.44745	4.69381	5.18178	5.60095	5.58736	5.60375
Retrotransposon	LTR	Gypsy	Gypsy	Gypsy-62_PAb-LTR_plnrep	0	0	0	0	0	0	0	0	0	0	0	0	0	0	0	6.83033	6.79705	6.80428	0	0	0	7.46462	7.48048	7.43815	0	0	0	0	0	0
Retrotransposon	LTR	Gypsy	Gypsy	Gypsy-621_AA-LTR_invrep	3.446807893	4.000033883	3.191845783	1.540445755	1.335001067	1.098612289	2.397895273	2.014903021	1.824549292	5.731180368	2.923161581	2.302585093	2.068012731	2.533696814	2.598562662	1.609437912	1.609437912	0	0	0	0	1.386294361	1.098612289	1.098612289	2.691243083	2.079441542	2.472926844	1.887069649	1.734601644	1.609437912
Retrotransposon	LTR	Gypsy	Gypsy	Gypsy-63_GM-I_edcotrep	4.2017	3.30322	3.3673	0	0	0.693147	1.09861	0	1.44036	2.38482	2.10843	2.46964	0.693147	0.693147	1.06784	1.83828	1.06784	1.79176	4.98816	5.46152	5.44595	2.07944	1.79176	1.85238	0	0	0	0	0	0
Retrotransposon	LTR	Gypsy	Gypsy	Gypsy-63_PAb-I_plnrep	3.65334	3.49953	3.48034	4.60935	4.54412	4.4903	4.60132	4.59132	4.55513	4.72319	4.64583	4.74787	4.24745	4.08639	4.16563	6.47564	6.41275	6.4384	4.4904	4.52625	4.46852	6.49515	6.48086	6.48821	3.07192	3.32377	2.72654	4.97695	4.94546	4.95164
Retrotransposon	LTR	Gypsy	Gypsy	Gypsy-63_PAb-LTR_plnrep	0	0	0	0	0	0	0	0	0	0	0	0	0	0	0	6.73717	6.70337	6.70701	0	0	0	6.73433	6.73207	6.72709	1.38629	0	0	0	0	0
Retrotransposon	LTR	Gypsy	Gypsy	Gypsy-63_SB-I_grasrep	0	0	0.693147	4.34734	5.15906	4.85203	2.09849	2.32456	2.22254	1.58045	1.7346	2.16645	3.24019	3.10109	2.97893	0	0.693147	0	1.94591	2.45674	1.47085	0	0.693147	0	2.25712	1.06087	1.38629	0	0.693147	0
Retrotransposon	LTR	Gypsy	Gypsy	Gypsy-64_PAb-I_plnrep	6.30646	6.31756	6.30015	4.05388	4.18807	4.20523	4.85762	4.82593	4.81643	4.98135	5.3084	5.28332	4.38535	4.3682	4.40678	5.96826	5.91549	5.90219	5.01374	5.01331	5.02051	5.65798	5.64797	5.65601	2.19904	2.42303	2.15016	5.72321	5.73277	5.70987
Retrotransposon	LTR	Gypsy	Gypsy	Gypsy-65_PAb-I_plnrep	3.77004	3.21514	3.63099	4.20269	4.28823	4.02572	4.82811	4.87999	4.80643	4.02502	4.22858	4.19629	3.88592	3.88391	3.91428	5.41803	5.3754	5.37307	4.9291	4.82781	4.86536	5.56875	5.55822	5.57437	3.21084	3.05636	3.14988	5.04079	5.05883	5.02496
Retrotransposon	LTR	Gypsy	Gypsy	Gypsy-65_PAb-LTR_plnrep	0	0	0	0	0	0	0	0	0	0	0	0	0	0	0	5.85425	5.76308	5.83837	0	0	0	5.49651	5.49528	5.46373	0	0	0	0	0	0
Retrotransposon	LTR	Gypsy	Gypsy	Gypsy-65_SB-I_grasrep	1.51983	1.84583	1.67398	2.54375	2.99573	3.14988	1.95684	1.7346	1.50408	1.09861	1.20397	1.20397	2.28238	2.28708	1.07264	2.17475	2.22334	2.37669	2.07944	1.96611	1.49549	2.55902	2.54375	2.87721	0	0	0	5.06733	4.76988	4.9966
Retrotransposon	LTR	Gypsy	Gypsy	Gypsy-66_PAb-I_plnrep	2.27877	1.58146	1.65823	3.46814	3.43859	3.52236	4.60449	4.47477	4.44525	4.79363	5.09755	5.15236	6.64564	6.66466	6.60689	7.99428	7.94184	7.97011	4.98677	4.91639	4.98709	7.83103	7.82705	7.82535	4.52204	5.2863	4.73142	6.86449	6.8302	6.87241
Retrotransposon	LTR	Gypsy	Gypsy	Gypsy-66_PAb-LTR_plnrep	0	0	0	0	0	0	0	0	0	0	0	0	0	0	0	6.67687	6.61554	6.67736	0	0	0	6.68085	6.74458	6.72015	0	0	0	0	0	0
Retrotransposon	LTR	Gypsy	Gypsy	Gypsy-66_SB-I_grasrep	2.67906	2.78389	2.84835	5.07884	5.06951	4.99898	3.62296	3.64839	3.84391	3.20221	3.66576	3.52636	5.41744	5.43497	5.60055	3.17083	3.31159	3.19627	3.91202	3.69258	3.83059	3.22442	3.31367	3.17462	4.07862	4.08877	4.05267	5.89576	6.0114	6.00366
Retrotransposon	LTR	Gypsy	Gypsy	Gypsy-67_MLP-I_fungi	0.693147	0	0	5.56739	5.49077	5.5033	1.72924	1.79176	2.1454	1.06784	0.950978	0.693147	2.30259	1.7346	2.00882	0.693147	0.693147	1.38629	1.93284	1.62746	1.68176	0.693147	0	0.693147	0.693147	1.20397	1.38629	3.09104	2.67415	2.20728
Retrotransposon	LTR	Gypsy	Gypsy	Gypsy-67_PAb-I_plnrep	3.21038	3.02414	3.23163	3.97366	3.92982	3.98775	4.98412	4.93226	4.97099	4.43869	4.85097	4.85597	5.44783	5.47437	5.4371	7.95127	7.92454	7.93278	5.10158	5.09708	5.04363	8.05251	8.05421	8.05272	2.71615	2.75317	2.47115	6.16496	6.12234	6.1159
Retrotransposon	LTR	Gypsy	Gypsy	Gypsy-67_PAb-LTR_plnrep	0	0	0	0	0	0	0	0	0	0	0	0	0	0	0	6.83572	6.86328	6.86158	0	0	0	8.21365	8.21128	8.20887	0	0	0	0	0	0
Retrotransposon	LTR	Gypsy	Gypsy	Gypsy-68_GM-I_edcotrep	1.098612289	0	0	0	0	0	0	0	1.098612289	2.785011242	3.17805383	3.676300672	0	1.098612289	1.098612289	2.228476659	2.302585093	2.751537441	1.098612289	0	0	5.361878848	5.609471795	5.611722009	0	0	0	1.745238977	2.024381953	1.722766598
Retrotransposon	LTR	Gypsy	Gypsy	Gypsy-68_PAb-I_plnrep	3.48386	3.17162	3.47988	4.63655	4.83058	4.74782	4.9371	4.87854	4.96155	5.01004	4.99224	5.08702	4.35035	4.3539	4.35298	6.92142	6.85614	6.89677	4.8886	4.83615	4.95008	6.95729	6.96209	6.96143	3.9184	4.36024	3.99372	5.38935	5.35628	5.34229
Retrotransposon	LTR	Gypsy	Gypsy	Gypsy-68_PAb-LTR_plnrep	0	0	0	0.693147	0	0	0	0	0	0	0	0	0	0	0	7.4285	7.4078	7.39271	0	0	0	7.28078	7.27722	7.27584	0	0	0	0	0.693147	0
Retrotransposon	LTR	Gypsy	Gypsy	Gypsy-69_LMi-I_invrep	1.722766598	1.645156346	2.104134154	5.156177599	4.80753127	4.96284463	1.609437912	1.098612289	1.550598322	1.734601644	2.131627125	2.602689685	1.717651753	1.860752118	0	1.609437912	1.098612289	1.098612289	1.098612289	1.609437912	1.098612289	1.098612289	1.504077397	1.098612289	1.435084525	1.504077397	1.945910149	2.351375257	1.504077397	1.580449787
Retrotransposon	LTR	Gypsy	Gypsy	Gypsy-69_PAb-I_plnrep	6.26675	6.30045	6.25431	4.27402	4.32356	4.22449	5.47034	5.47198	5.50369	5.42554	5.57875	5.58259	4.62799	4.64937	4.6389	5.44597	5.41446	5.41962	5.56195	5.56869	5.5888	5.54125	5.54053	5.5523	3.82094	4.07249	3.90962	5.58578	5.57109	5.55191
Retrotransposon	LTR	Gypsy	Gypsy	Gypsy-69_PM-I_vrtrep	1.335001067	1.386294361	1.098612289	3.540959324	4.859812404	5.192956851	0	0	1.098612289	0	1.904238091	2.862200881	2.302585093	2.397895273	2.501435952	2.054123734	1.098612289	1.609437912	1.098612289	1.098612289	1.098612289	1.871802177	2.397895273	1.098612289	3.979681654	4.147659395	3.817712326	1.791759469	2.397895273	2.397895273
Retrotransposon	LTR	Gypsy	Gypsy	Gypsy-7_ACe-LTR_invrep	5.38755	5.43663	5.39816	4.02535	4.31749	4.34381	3.55126	3.4012	3.62878	2.97893	4.09434	4.52179	3.7612	3.63759	3.90533	0	0	0	1.20397	1.99243	0.693147	1.28093	1.60944	1.67398	3.06027	2.66259	2.90872	3.8712	3.98898	3.59142
Retrotransposon	LTR	Gypsy	Gypsy	Gypsy-7_BG-I_fngrep	1.098612289	1.098612289	0	1.098612289	0	0	1.098612289	0	1.098612289	0	1.098612289	1.098612289	4.446006797	5.313205979	4.762173935	0	0	0	0	0	1.098612289	0	1.098612289	1.098612289	1.098612289	0	1.098612289	0	1.098612289	0
Retrotransposon	LTR	Gypsy	Gypsy	Gypsy-7_CFl-I_invrep	1.23214	2.48491	2.94444	1.27507	2.37158	2.14007	0.693147	0.693147	1.14513	2.97893	2.1454	2.25438	5.41276	4.86092	4.90209	1.76766	1.06784	0.693147	1.76766	0.693147	0.693147	1.7346	1.12393	0.693147	4.81335	4.58497	4.50384	0.693147	0.693147	0.693147
Retrotransposon	LTR	Gypsy	Gypsy	Gypsy-7_CP-I_edcotrep	2.43399	2.65168	2.15948	4.50023	4.66108	4.37497	3.16495	3.13715	3.22661	4.96334	5.07242	4.91346	3.56538	3.43869	3.60395	3.27158	3.30589	3.10523	2.91967	2.84345	2.77112	3.01575	3.24901	3.38539	3.42143	3.50445	3.60059	3.78191	3.60728	3.68121
Retrotransposon	LTR	Gypsy	Gypsy	Gypsy-7_PAb-I_plnrep	2.76669	2.50185	2.87569	4.78014	4.69367	4.46081	4.34578	4.30576	4.4446	4.92946	5.0083	5.00058	3.89844	3.94636	3.79917	6.57585	6.50641	6.51309	4.33924	4.33122	4.3359	6.64796	6.63317	6.64273	2.8864	3.3769	2.87881	5.13558	5.21968	5.17969
Retrotransposon	LTR	Gypsy	Gypsy	Gypsy-7_PAb-LTR_plnrep	0	0	0	0	0	0	0	0	0	0	0	0	0	0	0	7.701439863	7.59295093	7.6105161	0	0	0	7.442041537	7.440598722	7.454164239	0	0	1.098612289	0	0	0
Retrotransposon	LTR	Gypsy	Gypsy	Gypsy-7_PPe-I_edcotrep	2.91299	3.19545	3.0114	2.99957	2.8834	2.82413	3.50184	3.15427	3.22268	2.52264	2.74332	2.80768	3.59515	4.24235	4.07996	2.584	2.69035	2.17222	3.33596	3.28671	3.2922	2.65398	1.96478	2.60269	6.43704	6.43775	6.51851	5.48358	5.32275	6.00725
Retrotransposon	LTR	Gypsy	Gypsy	Gypsy-7_SCH-I_fungi	0.693147	0	0	2.48491	2.30259	1.79176	3.28342	2.45101	2.77259	1.33977	2.07944	1.84177	5.99503	6.1181	6.09131	0.693147	0	0	2.89037	2.89037	2.92674	0.693147	0	0	0	0	0	3.23212	3.09104	3.05289
Retrotransposon	LTR	Gypsy	Gypsy	Gypsy-7_SMo-I_plnrep	2.65226	3.21554	3.14415	3.17805	3.36346	3.4114	3.3825	3.09104	2.93857	3.10057	3.72397	3.52183	3.04769	2.99906	2.86128	3.26321	3.44893	3.04769	3.24357	3.07192	3.15842	3.17805	2.23359	2.81341	0	0	0	4.813	5.76126	5.80082
Retrotransposon	LTR	Gypsy	Gypsy	Gypsy-7_ST-I_edcotrep	1.9406	2.53142	2.09495	2.66549	2.71852	2.17682	2.79876	2.9018	2.27181	2.09218	1.91054	2.01934	6.73221	6.46469	6.93199	2.0149	1.66771	2.00747	2.53216	3.21084	2.74727	1.98513	1.96611	1.81916	2.49994	2.33537	2.30259	3.07269	3.37417	3.11743
Retrotransposon	LTR	Gypsy	Gypsy	Gypsy-7_TC-I_edcotrep	5.4224	5.31086	5.23867	3.86917	3.63099	3.72622	4.49389	4.85323	4.67011	3.12968	3.04869	3.2727	2.96313	2.93631	3.27543	2.65752	2.60022	2.54515	4.99091	5.04808	4.98919	2.59691	2.74016	2.43968	4.77869	4.61468	4.72019	4.26376	4.19899	4.23628
Retrotransposon	LTR	Gypsy	Gypsy	Gypsy-7-I_BF_	0	0	0	3.52636	3.3322	3.01375	0	0	0	0	0	0	1.09861	1.38629	1.38629	1.38629	0	0	0	0	0	0	0	0	0	1.72277	1.38629	5.19573	5.60053	4.66613
Retrotransposon	LTR	Gypsy	Gypsy	Gypsy-70_LMi-I_invrep	3.93834	3.39003	3.81404	4.72358	4.60803	5.02607	2.12026	2.45101	0.693147	2.63906	3.44042	2.56495	2.84491	2.79321	2.79321	3.054	3.2884	3.20545	2.07944	2.02815	2.02815	3.44042	3.58352	3.68051	0.693147	1.79176	1.79176	3.32023	3.28342	3.14988
Retrotransposon	LTR	Gypsy	Gypsy	Gypsy-70_PAb-I_plnrep	4.79715	4.83479	4.69968	5.44109	5.57736	5.81287	5.60927	5.62675	5.61825	5.2081	5.26479	5.2385	4.8192	4.80949	4.7987	4.73668	4.72513	4.77806	5.64279	5.58912	5.61127	4.81616	4.78214	4.77762	3.54096	3.19218	3.45416	5.78302	5.79344	5.77362
Retrotransposon	LTR	Gypsy	Gypsy	Gypsy-70_PAb-LTR_plnrep	0	0	0	0	0	0	3.81064	3.95872	3.66868	3.76752	3.15167	2.83908	4.8725	5.03556	4.62301	4.5102	4.54584	4.51023	4.24473	4.13148	4.14146	4.62145	4.62706	4.64901	0	0	0	4.47694	4.48385	4.4449
Retrotransposon	LTR	Gypsy	Gypsy	Gypsy-70-I_ZM_grasrep	3.32051	3.14884	3.24705	3.55098	3.59102	3.69976	3.40337	3.43008	3.50397	4.10539	4.41661	4.3358	4.3281	4.16596	4.49	2.74698	2.7744	2.91679	3.08568	3.44129	3.41695	3.05679	3.18338	3.25156	3.47386	3.51792	3.22732	5.83069	5.69545	5.85456
Retrotransposon	LTR	Gypsy	Gypsy	Gypsy-71_CGi-LTR_invrep	5.065754593	4.905274778	4.656680457	2.140066163	1.609437912	1.098612289	0	1.098612289	1.098612289	1.098612289	1.098612289	1.098612289	1.098612289	1.098612289	0	0	0	0	0	0	0	0	0	0	0	0	0	0	0	1.098612289
Retrotransposon	LTR	Gypsy	Gypsy	Gypsy-71_PAb-I_plnrep	4.39002	4.3093	4.35411	5.04253	5.06325	5.28613	4.85541	4.80441	4.83051	4.54276	4.97869	4.85772	6.63278	6.61483	6.62316	8.49765	8.46324	8.47638	4.97689	4.94225	4.91118	8.53084	8.53351	8.52921	3.70798	3.72943	3.40886	7.29625	7.33984	7.31265
Retrotransposon	LTR	Gypsy	Gypsy	Gypsy-71_PAb-LTR_plnrep	0	0	0	0	0.693147	0	0.693147	0.693147	0.693147	0.693147	0	0	0	0	0	8.49903	8.46024	8.46219	1.67398	0.693147	1.7346	8.51386	8.51289	8.51004	0	0.693147	0	0	0	0
Retrotransposon	LTR	Gypsy	Gypsy	Gypsy-71-I_ZM_grasrep	5.62247	5.62967	5.65892	4.30112	4.20026	4.70897	3.63909	3.36932	3.38936	3.10472	3.06267	2.92486	5.11999	5.43808	5.06531	1.70475	2.19722	2.35815	3.56139	3.27557	3.23916	2.0149	2.20461	2.53142	3.51349	3.33983	3.41444	3.534	3.42128	3.31584
Retrotransposon	LTR	Gypsy	Gypsy	Gypsy-72_GM-I_edcotrep	5.28732	5.17422	5.29544	3.19674	2.82379	3.21888	2.70113	2.69848	2.7365	3.77797	3.82327	3.98458	3.35341	3.35774	3.27504	3.62649	3.65469	3.30843	2.76212	2.82287	2.81797	3.85721	3.58753	3.72935	2.1081	2.45824	2.0149	3.11315	3.14389	3.40458
Retrotransposon	LTR	Gypsy	Gypsy	Gypsy-72_PAb-I_plnrep	4.17173	4.2287	4.2207	3.36353	3.45038	3.38672	6.56136	6.56256	6.5356	6.67089	7.01532	6.99139	7.20301	7.19997	7.21041	8.61076	8.55469	8.57467	6.94016	6.91795	6.93773	8.65001	8.64346	8.64648	0.786965	1.02962	1.33123	8.33341	8.33444	8.32785
Retrotransposon	LTR	Gypsy	Gypsy	Gypsy-72_PAb-LTR_plnrep	0	0	0	0	0	1.25276	4.99018	4.87038	4.99253	5.02072	4.93644	5.16203	7.11762	7.10565	7.14857	8.22006	8.17509	8.21775	4.54116	4.52562	4.82863	8.56165	8.58055	8.59014	0	0	0	8.3632	8.35984	8.3609
Retrotransposon	LTR	Gypsy	Gypsy	Gypsy-73_PAb-I_plnrep	2.46293	2.78876	2.72879	4.04888	4.92469	4.69135	5.15186	4.99137	4.92449	3.81556	4.17264	4.19662	2.83505	3.09617	2.70902	7.92805	7.88119	7.89831	4.99405	5.07385	5.0471	8.01388	8.01434	8.00771	0	0	0.693147	2.45042	2.23496	2.35407
Retrotransposon	LTR	Gypsy	Gypsy	Gypsy-73_PAb-LTR_plnrep	0	0	0	0.693147	0	0	1.82161	1.26369	1.19392	0.693147	1.06784	0.693147	1.60944	2.07944	1.38629	7.45819	7.435	7.42474	1.76099	1.15577	0	7.43552	7.40706	7.38644	0	0	0	1.98281	1.21444	0.693147
Retrotransposon	LTR	Gypsy	Gypsy	Gypsy-73_SB-I_grasrep	0	0	1.09861	5.18878	4.55987	3.82361	3.29584	2.93386	3.04452	3.17805	2.50844	2.584	0.693147	0	0.693147	0.693147	0.693147	0	3.4012	2.46385	2.89037	0.693147	0.693147	0	3.1964	2.36231	3.32324	1.12847	1.29928	0
Retrotransposon	LTR	Gypsy	Gypsy	Gypsy-74_PAb-I_plnrep	5.43365	5.43911	5.4396	5.70471	5.72786	5.77651	7.54398	7.50796	7.53879	8.06529	8.10377	8.10127	7.05549	7.05915	7.05412	9.98056	9.95949	9.96918	7.31878	7.32938	7.31983	10.1566	10.1561	10.1616	1.29392	1.07103	1.11024	7.22891	7.21317	7.23513
Retrotransposon	LTR	Gypsy	Gypsy	Gypsy-74_PAb-LTR_plnrep	0	0	0	0	0	0	0	1.413693065	1.945910149	1.4663363	1.098612289	1.734601644	5.471568747	5.442417711	5.428248536	9.45766909	9.792589511	9.756720381	1.609437912	0	1.435084525	9.330192377	9.332336741	9.350137096	1.098612289	0	0	2.868773519	2.26436388	2.242946547
Retrotransposon	LTR	Gypsy	Gypsy	Gypsy-74_PTr-I_dcotrep	4.99844	5.35304	5.1358	1.59109	1.62746	1.99243	1.58045	2.36713	0.693147	2.30259	2.26868	2.03688	0.693147	0	0.693147	0	0	0.693147	2.83321	2.23359	2.30259	0.693147	1.38629	0.693147	0	0	0	4.77068	4.47734	4.37366
Retrotransposon	LTR	Gypsy	Gypsy	Gypsy-74-I_NV_nemrep	0	0	0	0	0	0	5.18818	4.5326	4.42883	2.59739	2.41866	3.43399	2.26868	2.30259	2.45674	3.35574	3.65498	3.4012	4.72739	4.6944	4.5254	3.73767	3.35574	2.99573	0	0	0	0	0	0
Retrotransposon	LTR	Gypsy	Gypsy	Gypsy-74-I_ZM_grasrep	2.890371758	2.879198457	2.708050201	1.098612289	1.704748092	1.098612289	1.098612289	1.098612289	1.098612289	1.435084525	1.435084525	1.76766143	4.959840121	5.094866142	4.789938746	2.32238772	2.564949357	2.901421594	1.209837573	0	0	3.169685581	3.289643654	3.051304152	2.451005098	2.813412717	2.282382386	6.262636067	6.14132102	6.34878928
Retrotransposon	LTR	Gypsy	Gypsy	Gypsy-75_PAb-I_plnrep	3.12563	2.76458	2.82613	4.32101	4.14066	4.82302	4.3863	4.38489	4.50152	4.91928	5.0743	5.16492	5.979	5.94493	5.94669	8.19093	8.15311	8.16402	4.68436	4.63949	4.64895	8.12294	8.12136	8.11439	4.26819	4.44108	4.93894	6.11728	6.14692	6.115
Retrotransposon	LTR	Gypsy	Gypsy	Gypsy-75_PAb-LTR_plnrep	0.980831	0	0	0.693147	0	0	0	0	0	0	0	0	0.693147	0.693147	0	7.9983	7.97881	7.99056	0	0	0	8.06958	8.08415	8.08218	0	0	0	0	0	0
Retrotransposon	LTR	Gypsy	Gypsy	Gypsy-76_PAb-I_plnrep	4.03333	4.00576	4.04894	4.7193	4.76016	4.76572	7.15261	7.14077	7.15876	6.57637	6.6681	6.68148	3.4117	3.45447	3.56686	7.57441	7.54958	7.57344	7.12486	7.15145	7.12124	7.62856	7.6344	7.63598	3.09474	2.81065	3.02852	3.81194	3.83052	3.87133
Retrotransposon	LTR	Gypsy	Gypsy	Gypsy-76_PAb-LTR_plnrep	1.098612289	0	1.098612289	0	0	1.098612289	3.834346829	3.90197267	3.823799257	3.57618097	2.890371758	2.950269318	1.098612289	0	0	7.601527264	8.60546777	8.442644199	3.843744165	3.791736088	3.946654357	7.607535413	7.627758584	7.623700596	1.098612289	1.098612289	0	3.360705194	3.486891781	3.67256967
Retrotransposon	LTR	Gypsy	Gypsy	Gypsy-76_SB-I_grasrep	1.098612289	1.098612289	0	1.098612289	0	1.791759469	0	0	0	4.450464185	4.93878119	5.041991832	0	1.098612289	0	0	0	0	0	0	0	1.098612289	1.098612289	1.349925976	0	0	0	1.609437912	1.609437912	0
Retrotransposon	LTR	Gypsy	Gypsy	Gypsy-76D_CCri-I_plnrep	1.386294361	2.277267285	1.871802177	1.098612289	1.098612289	0	0	1.098612289	0	1.845826164	1.35812377	0	4.32129021	5.056245805	4.615120517	1.098612289	1.098612289	1.098612289	0	1.098612289	0	0	1.32175584	0	0	0	1.098612289	0	1.098612289	1.609437912
Retrotransposon	LTR	Gypsy	Gypsy	Gypsy-77_GM-I_edcotrep	2.507377283	2.397895273	1.932211029	3.962314899	3.800584053	3.528320368	3.401197382	3.277144733	3.480214949	2.282382386	2.036882362	1.556446335	4.664297216	4.190113728	4.121426189	4.591664392	4.183139625	4.438458952	2.298227613	2.268683886	2.598562662	4.760420261	4.914961048	4.930660917	5.00638628	5.339939041	5.308267697	2.469640716	2.240709689	2.949688335
Retrotransposon	LTR	Gypsy	Gypsy	Gypsy-77_PAb-I_plnrep	3.92909	3.65955	4.24009	2.64921	2.66162	2.77649	5.97073	6.00012	5.98811	6.33027	6.88834	6.87168	7.7668	7.76077	7.79053	9.43985	9.37987	9.40769	6.36247	6.32512	6.36105	9.41052	9.41066	9.40985	3.23159	3.51417	2.85862	7.39113	7.39042	7.38457
Retrotransposon	LTR	Gypsy	Gypsy	Gypsy-77_PAb-LTR_plnrep	0	1.09861	1.06087	1.18562	1.34993	1.38629	8.01276	8.07971	7.93432	7.81167	7.88137	7.79809	8.02804	8.00916	8.04435	10.3731	10.3535	10.3501	7.83328	7.7628	7.80543	10.5282	10.5215	10.5153	1.07881	1.04145	0.693147	8.05566	8.03327	8.00452
Retrotransposon	LTR	Gypsy	Gypsy	Gypsy-78_PAb-I_plnrep	3.36826	3.60168	3.46511	4.78638	4.65818	4.65125	7.06019	7.04415	7.05749	6.13438	6.46032	6.43359	6.34712	6.33681	6.34299	7.58241	7.54631	7.55162	6.99128	6.99579	6.97793	7.63172	7.63584	7.62794	2.13073	1.62414	1.63665	4.45028	4.40114	4.37916
Retrotransposon	LTR	Gypsy	Gypsy	Gypsy-78_PAb-LTR_plnrep	0.693147	0	0	1.75402	3.3322	2.56495	6.44228	6.39221	6.40007	5.76911	5.82779	5.83427	5.69915	5.73899	5.68422	7.84014	7.83648	7.82373	6.3244	6.34106	6.36037	7.9691	7.96283	7.97403	0.693147	0	0	4.70892	4.75267	4.77452
Retrotransposon	LTR	Gypsy	Gypsy	Gypsy-79_AA-I_invrep	2.48491	1.79176	1.75402	3.68888	3.94642	3.58352	5.46489	5.19699	5.20799	1.25276	1.94591	0.693147	0	0.693147	0.693147	3.80109	3.04452	2.97553	5.03813	4.86893	5.14749	2.8094	3.12676	3.74445	0	0	0.693147	1.92529	2.07944	2.12823
Retrotransposon	LTR	Gypsy	Gypsy	Gypsy-79_PAb-I_plnrep	5.10995	5.08061	5.06402	6.01791	5.91025	5.9988	6.14068	6.11338	6.1329	6.02446	5.77864	5.7718	6.64698	6.63588	6.63401	7.46027	7.46065	7.46254	5.833	5.86503	5.83436	7.44849	7.43971	7.45353	3.04702	3.38285	3.24755	7.27411	7.25363	7.26285
Retrotransposon	LTR	Gypsy	Gypsy	Gypsy-79_PAb-LTR_plnrep	0	0	0	0	0	0	3.998200702	3.654978765	3.95763288	3.161246712	3.204225024	2.908719078	1.098612289	1.098612289	0	7.068316794	7.284018121	7.256417204	3.251664357	3.63758616	3.663561646	7.03438793	7.082405822	7.048968342	0	0	0	0	0	1.098612289
Retrotransposon	LTR	Gypsy	Gypsy	Gypsy-8_Ano-LTR_vrtrep	1.349925976	0	0	0	1.098612289	0	0	0	0	1.098612289	1.098612289	1.098612289	5.017279837	4.890349128	5.003946306	0	0	0	0	0	0	1.098612289	0	1.945910149	2.708050201	2.197224577	2.397895273	4.574710979	4.762173935	4.343805422
Retrotransposon	LTR	Gypsy	Gypsy	Gypsy-8_CCO-I_fngrep	2.614962217	2.614962217	2.564949357	1.945910149	1.791759469	2.197224577	0	0	1.098612289	0	1.098612289	1.609437912	2.833213344	2.698477865	3.070166978	0	1.098612289	1.098612289	1.098612289	1.098612289	1.098612289	1.098612289	0	1.098612289	1.098612289	2.564949357	1.791759469	4.727387819	4.253245371	5.035653057
Retrotransposon	LTR	Gypsy	Gypsy	Gypsy-8_DVir-I_invrep	5.78383	5.4492	5.36062	4.05468	3.94573	3.69718	4.47354	4.45046	4.48187	3.42318	3.64806	5.32626	3.58352	4.1795	4.73327	3.89182	3.87812	3.06593	4.30407	4.7185	4.42399	4.00125	3.78419	3.67207	4.9151	4.39445	4.70953	3.91999	3.91202	3.96651
Retrotransposon	LTR	Gypsy	Gypsy	Gypsy-8_HMM-LTR_invrep	6.67203	6.10619	6.67428	6.1714	6.10312	5.99716	5.45042	5.11048	5.17211	4.89784	5.54908	6.00071	4.39033	4.25797	4.52179	3.55535	2.77259	3.65989	4.11321	4.20682	4.19397	4.62497	4.67683	4.63612	3.72397	3.70306	3.27569	5.02763	4.90897	4.97969
Retrotransposon	LTR	Gypsy	Gypsy	Gypsy-8_PAb-I_plnrep	3.02355	3.12902	3.06176	4.6162	4.53749	4.59842	3.96638	3.93199	4.00779	4.04551	4.50444	4.5161	5.98868	5.94464	5.94757	7.68789	7.66372	7.67834	4.13082	4.16089	4.1414	7.69862	7.69644	7.69536	2.73894	3.14011	2.62994	6.58213	6.56064	6.56139
Retrotransposon	LTR	Gypsy	Gypsy	Gypsy-8_PAb-LTR_plnrep	1.098612289	1.098612289	0	1.098612289	0	0	0	0	0	0	1.098612289	1.098612289	1.609437912	0	0	7.873883246	7.56975745	7.599901959	1.098612289	0	0	7.38127771	7.372947351	7.372589319	0	1.386294361	1.098612289	1.435084525	0	0
Retrotransposon	LTR	Gypsy	Gypsy	Gypsy-8_PTri-I_edcotrep	1.609437912	1.098612289	1.098612289	1.223775432	1.504077397	1.727220948	2.128231706	1.76766143	2.387142211	1.609437912	1.725509262	1.335001067	2.653241965	2.618439084	2.449987339	3.755179704	3.51792208	3.109926655	1.635754571	1.272966076	1.699386472	2.145931283	2.583997552	2.48823444	4.923623917	5.164785974	4.882801923	1.819158984	2.068012731	1.791759469
Retrotransposon	LTR	Gypsy	Gypsy	Gypsy-8_TC-I_edcotrep	2.92192	3.08328	2.92755	4.60626	4.30557	4.45285	4.13224	4.09123	4.32479	3.79452	3.92641	3.809	4.96615	5.06146	5.21235	3.9257	3.56616	3.64153	4.11462	4.12637	4.04863	4.03622	4.25986	4.12304	3.77322	3.57917	3.71705	5.33812	5.35125	5.34089
Retrotransposon	LTR	Gypsy	Gypsy	Gypsy-80_CGi-I_invrep	0	0	1.098612289	1.098612289	0	0	0	0	0	0	0	0	0	1.098612289	1.098612289	0	0	0	0	0	0	2.197224577	2.197224577	1.098612289	0	0	1.945910149	5.209486153	5.442417711	5.398162702
Retrotransposon	LTR	Gypsy	Gypsy	Gypsy-80_PAb-I_plnrep	3.59203	3.58748	3.53927	4.7254	4.71438	4.70504	6.25145	6.19644	6.22338	5.69523	5.82708	5.84854	5.51096	5.50186	5.53128	5.97662	5.97462	5.9738	6.15897	6.11231	6.15661	6.09642	6.08946	6.09147	5.58195	5.64351	5.7567	6.07992	6.05489	6.077
Retrotransposon	LTR	Gypsy	Gypsy	Gypsy-80_PAb-LTR_plnrep	0	0	0	0	0	0	0	0	0	0	0	0	4.27667	3.88156	4.29046	5.75244	5.81592	5.8069	0	0	0	5.93228	5.92574	5.97765	0	0	0	5.13308	5.25589	5.07607
Retrotransposon	LTR	Gypsy	Gypsy	Gypsy-80-I_ZM_grasrep	2.397895273	1.871802177	1.609437912	2.351375257	1.098612289	2.302585093	0	2.079441542	1.386294361	1.791759469	2.63905733	2.079441542	5.568344504	6.02827852	6.048317359	3.912023005	3.772760938	3.624340933	0	1.098612289	1.609437912	3.688879454	3.713572067	3.417726684	0	1.098612289	0	5.844992643	5.713732806	5.641907071
Retrotransposon	LTR	Gypsy	Gypsy	Gypsy-81_PAb-I_plnrep	4.35016	4.23787	4.37512	5.30342	5.30277	5.29045	7.43874	7.42835	7.41492	5.5251	5.59411	5.57961	4.87777	4.89423	4.86197	6.17388	6.1368	6.15349	7.46685	7.46372	7.46919	6.07143	6.08814	6.08267	4.92316	5.3452	5.02353	4.00665	4.04732	4.01984
Retrotransposon	LTR	Gypsy	Gypsy	Gypsy-81_PAb-LTR_plnrep	0	0	0	1.098612289	0	1.098612289	0	1.098612289	0	0	1.098612289	0	1.386294361	1.098612289	1.609437912	6.103216097	6.49757256	6.155356908	0	0	0	6.061181823	6.080470808	6.02359044	0	0	0	0	0	0
Retrotransposon	LTR	Gypsy	Gypsy	Gypsy-82_PAb-I_plnrep	5.32702	5.33173	5.38265	4.76294	4.81389	4.81105	4.99964	4.93093	4.85416	5.75506	6.37513	6.32035	5.71825	5.71468	5.74759	6.73119	6.67134	6.68931	5.49432	5.35046	5.4696	6.6781	6.69664	6.69159	1.79176	1.94591	1.06784	4.59194	4.57183	4.5307
Retrotransposon	LTR	Gypsy	Gypsy	Gypsy-82_PAb-LTR_plnrep	0	1.38629	0	0	0	0	0	0	0	0	0	0	0	0	0	6.70789	6.63817	6.69556	0	0	0	7.06593	7.07364	7.0576	0	0	0	0	0	0
Retrotransposon	LTR	Gypsy	Gypsy	Gypsy-82_ZM-I_grasrep	5.13729	5.33643	5.33137	2.68208	2.69463	2.65089	1.95881	1.77537	2.16799	2.48491	2.04769	2.04198	1.89925	1.91537	1.66588	2.66786	2.69762	2.82627	2.15434	1.9633	1.85958	2.93888	2.56666	2.76676	2.96527	3.04452	3.10568	3.5453	3.40461	3.47181
Retrotransposon	LTR	Gypsy	Gypsy	Gypsy-83_GM-I_edcotrep	1.68948	1.12393	1.5724	2.48897	2.74887	2.94952	3.12357	2.94921	3.21314	3.03697	3.9624	3.7152	5.51618	5.70283	5.66566	3.33413	3.15324	3.06763	3.24867	3.54458	3.83329	3.9198	3.7172	3.63871	1.38629	1.12847	1.70475	4.64319	4.46731	4.44656
Retrotransposon	LTR	Gypsy	Gypsy	Gypsy-83_PAb-I_plnrep	2.62756	2.43928	3.12822	3.9215	3.87016	3.50708	4.44984	4.49117	4.41442	5.1551	5.516	5.5462	6.77894	6.78766	6.81929	7.8926	7.87247	7.87783	4.37958	4.3347	4.32069	7.77336	7.77057	7.77426	4.59259	4.4676	4.53502	5.91042	5.95147	5.95774
Retrotransposon	LTR	Gypsy	Gypsy	Gypsy-83_PAb-LTR_plnrep	0	0	1.098612289	1.098612289	0	0	0	0	0	0	0	0	4.238556011	4.379940711	4.456670178	8.752500859	9.132427478	9.042367775	0	0	0	8.563576652	8.563179428	8.571395351	0	0	1.098612289	0	0	0
Retrotransposon	LTR	Gypsy	Gypsy	Gypsy-84_GM-I_edcotrep	3.537	3.45456	3.05595	2.67415	2.83472	2.8388	4.93408	5.31944	5.2356	3.52234	4.06548	3.99772	3.06311	3.38197	3.14248	2.79884	2.73003	2.29941	4.76082	4.67873	4.71411	2.55902	2.55011	2.46177	2.90417	3.61989	2.56495	3.50513	3.27984	3.50656
Retrotransposon	LTR	Gypsy	Gypsy	Gypsy-84_PAb-I_plnrep	1.7837	1.85813	1.84206	4.1241	3.99215	3.96081	5.63186	5.69372	5.70452	3.42968	3.5811	3.4854	5.55941	5.59256	5.59795	9.01067	8.9883	8.99761	6.13926	6.08863	6.10019	9.02204	9.02249	9.02111	2.53898	1.97234	1.83023	6.12678	6.09798	6.07322
Retrotransposon	LTR	Gypsy	Gypsy	Gypsy-84_PAb-LTR_plnrep	0	0	0	1.609437912	1.098612289	1.098612289	1.673975809	2.397895273	2.159484634	2.251291799	2.433613355	1.686398954	2.351375257	2.351375257	3.270834298	9.582034954	9.917863718	9.888551564	2.669212348	2.00148	2.397895273	9.383772535	9.390284104	9.396795042	1.098612289	0	0	5.705634093	5.740506484	5.701185773
Retrotransposon	LTR	Gypsy	Gypsy	Gypsy-85_PAb-I_plnrep	5.71004	5.3671	5.35614	3.17669	3.68315	2.9143	5.57086	5.54272	5.55492	5.60115	6.01534	5.98102	6.30664	6.31216	6.33166	7.75683	7.72196	7.72676	5.69079	5.66209	5.70896	7.66201	7.66681	7.66483	2.71671	2.0001	2.6112	6.43985	6.43767	6.41295
Retrotransposon	LTR	Gypsy	Gypsy	Gypsy-85_PAb-LTR_plnrep	1.098612289	0	0	1.098612289	1.098612289	0	2.197224577	2.197224577	2.197224577	0	0	0	1.098612289	1.299283893	1.609437912	8.313364403	8.419950746	8.390166313	1.098612289	0	0	8.081799663	8.073851746	8.08524036	0	0	1.098612289	1.098612289	0	0
Retrotransposon	LTR	Gypsy	Gypsy	Gypsy-86_CCri-I_plnrep	0	1.098612289	0	1.609437912	0	1.299283893	1.098612289	0	1.098612289	1.749199855	1.408767439	1.299283893	2.197224577	1.098612289	1.098612289	3.737669618	3.891820298	3.33220451	1.098612289	0	1.526056303	3.706579382	3.314186005	4.069026754	5.129898715	4.976733742	5.156177599	3.044522438	1.609437912	1.098612289
Retrotransposon	LTR	Gypsy	Gypsy	Gypsy-86_GM-I_edcotrep	1.76707	1.89256	1.77956	2.93268	3.17484	3.04288	3.31323	3.44275	3.33485	1.85428	1.89939	1.72404	2.26718	2.47968	3.0239	0.924949	1.31824	1.34491	3.16969	3.65689	3.35785	0.996831	0.890973	0.957298	5.02785	4.85696	4.88611	2.01139	2.56128	2.60369
Retrotransposon	LTR	Gypsy	Gypsy	Gypsy-86_PAb-I_plnrep	4.24348	4.2944	4.2586	5.63515	5.77271	5.80388	4.38402	4.37088	4.30696	4.43332	4.40638	4.39577	4.72105	4.7171	4.62575	5.84868	5.81043	5.82617	4.62315	4.66616	4.6903	5.96702	5.9476	5.95242	5.64267	5.54961	5.64615	5.78229	5.79119	5.7983
Retrotransposon	LTR	Gypsy	Gypsy	Gypsy-86_PAb-LTR_plnrep	0	1.098612289	1.098612289	1.098612289	0	0	1.435084525	0	2.397895273	0	1.098612289	1.098612289	5.485232523	5.527884244	5.525237777	7.393386164	7.541608827	7.642898165	0	1.609437912	1.098612289	7.2930721	7.309834662	7.331151984	0	0	0	3.984032921	3.93852666	3.666122467
Retrotransposon	LTR	Gypsy	Gypsy	Gypsy-87_PAb-I_plnrep	2.83184	3.35988	3.69413	4.87704	4.55863	4.87559	3.53292	3.57939	3.48572	4.5647	5.05467	5.13952	6.251	6.2306	6.26194	8.01548	7.97069	7.99064	3.41362	3.40375	3.42092	7.88399	7.88137	7.87726	4.57692	5.03695	3.95124	5.43822	5.5144	5.47095
Retrotransposon	LTR	Gypsy	Gypsy	Gypsy-87_PAb-LTR_plnrep	0	0	0	0	0	0	0	0	0	0	0	0	0	0	0	8.70466	8.711	8.68539	0	0	0	8.20888	8.19911	8.20995	0	1.29928	0	0	0	0
Retrotransposon	LTR	Gypsy	Gypsy	Gypsy-88_GM-I_edcotrep	1.41227	1.30625	1.4929	3.12148	3.22432	2.81939	3.43675	3.27615	3.11906	2.58756	3.03495	2.27632	4.72648	4.8225	5.02066	1.62861	1.62643	1.96944	3.20545	3.24401	3.26023	1.65292	1.15672	1.89712	1.72277	0	2.36713	2.89519	2.75969	2.44095
Retrotransposon	LTR	Gypsy	Gypsy	Gypsy-88_PAb-I_plnrep	4.39445	4.48044	4.51604	5.43592	5.47718	5.46537	4.83645	4.89756	4.88602	5.60827	5.73908	5.8017	4.80082	4.76077	4.77105	6.24953	6.24293	6.21457	5.17456	5.25301	5.12606	6.44186	6.43555	6.44355	3.16931	3.33077	3.16918	5.74641	5.89108	5.76982
Retrotransposon	LTR	Gypsy	Gypsy	Gypsy-88_PAb-LTR_plnrep	0	0	0	0	0	0	1.33977	3.09104	2.85263	2.58022	3.2884	3.24259	0	0	0	6.40463	6.34306	6.35068	2.22462	2.59026	2.63906	6.83579	6.84976	6.85357	0	0	0	0	0	0
Retrotransposon	LTR	Gypsy	Gypsy	Gypsy-9_ACe-LTR_invrep	4.91265	4.96783	4.80636	4.4961	4.0355	3.41773	4.95784	4.83855	4.61654	5.00873	5.77986	5.81028	4.39268	4.45766	4.56435	4.31939	4.03044	4.07511	4.49663	4.63056	4.69004	5.00491	5.10681	5.0698	4.08478	3.17108	3.41773	4.69788	4.58497	4.58205
Retrotransposon	LTR	Gypsy	Gypsy	Gypsy-9_BG-I_fngrep	2.014903021	1.894174652	2.397895273	1.609437912	1.752538623	1.609437912	1.712977772	1.568615918	2.079441542	5.850476854	1.871802177	2.367123927	1.550598322	1.386294361	2.140066163	1.098612289	1.265665091	1.098612289	1.386294361	0	0	1.712977772	1.734601644	1.488076733	2.054123734	1.609437912	1.945910149	1.550598322	1.4663363	1.098612289
Retrotransposon	LTR	Gypsy	Gypsy	Gypsy-9_DBp-I_invrep	0.693147	1.14513	0.693147	0.693147	0.693147	0	0.967584	0.693147	0.693147	0	0.693147	0	1.58045	2.59739	2.11453	2.23359	1.29928	2.31912	0	0.693147	1.28093	1.51983	2.11021	1.67398	5.10696	5.25836	5.28405	1.38629	1.57554	1.65823
Retrotransposon	LTR	Gypsy	Gypsy	Gypsy-9_PAb-I_plnrep	2.809926654	3.256202438	3.171863879	1.834426161	2.082485654	2.210738408	1.912184937	1.938227859	1.993728413	2.228082428	2.364516155	2.376414383	3.471416612	3.48952872	3.598336394	9.260187121	9.127999526	9.120853205	2.722754889	2.771544427	2.548405568	8.831945535	8.82992001	8.828089711	1.213023721	1.098612289	1.170070563	3.511876727	3.489312039	3.628986127
Retrotransposon	LTR	Gypsy	Gypsy	Gypsy-9_PAb-LTR_plnrep	0	0	1.098612289	1.098612289	0	0	1.098612289	1.609437912	1.098612289	0	0	0	0	1.098612289	0	9.315663887	9.649266046	9.58754317	0	1.098612289	0	9.159988739	9.169301687	9.168425072	0	0	1.098612289	1.098612289	2.397895273	1.413693065
Retrotransposon	LTR	Gypsy	Gypsy	Gypsy-9_SI-I_invrep	1.90954	1.99243	1.74524	2.07944	0.693147	2.3896	0.693147	0.693147	0.693147	1.0116	0.693147	0	5.48203	4.99496	5.35816	2.59739	1.67398	2.30259	1.38629	1.38629	1.58045	2.63906	2.92674	3.06805	0	0.693147	0	3.64134	3.35574	3.70306
Retrotransposon	LTR	Gypsy	Gypsy	Gypsy-9_SLL-I_fungi	2.23359	2.45674	3.054	0	0.693147	0.693147	1.28093	0	1.64866	1.38629	1.64866	1.79176	7.8741	7.87702	7.75644	2.12823	2.7213	2.03688	0	0.693147	0	2.85263	2.83321	3.06027	0.693147	0	0.693147	5.25227	5.17615	5.18178
Retrotransposon	LTR	Gypsy	Gypsy	Gypsy-90_GM-I_edcotrep	1.38629	0	1.38629	0.693147	0	0	4.68444	4.4794	4.78192	0.693147	0	0	4.15016	3.934	3.94311	1.31219	1.96166	1.12847	4.48976	4.58369	5.38856	1.56218	1.54045	2.33075	0	0	0	4.14208	4.1957	4.32192
Retrotransposon	LTR	Gypsy	Gypsy	Gypsy-93_GM-I_edcotrep	2.66259	2.80158	2.83489	3.15621	3.16372	3.01515	2.62965	2.52498	2.83875	3.42751	3.38569	3.39715	4.45932	4.09317	4.65314	2.41765	2.42199	2.52293	2.77054	2.81921	2.61997	2.04769	2.25496	2.19504	5.92502	5.51219	5.08965	2.36529	2.6494	2.54886
Retrotransposon	LTR	Gypsy	Gypsy	Gypsy-93_ZM-I_grasrep	3.97489	3.95399	3.89134	5.43149	5.5178	5.49851	3.91149	3.77378	3.79174	3.522	3.7263	3.61436	5.00213	4.87411	4.94526	2.80372	2.77094	2.99871	3.63601	3.57167	3.46949	3.31913	3.3392	3.44402	1.79176	1.63761	1.91555	5.08919	5.04489	5.10207
Retrotransposon	LTR	Gypsy	Gypsy	Gypsy-97_GM-I_edcotrep	2.67752	2.91777	2.96183	2.84702	3.09627	2.98111	2.99407	3.3124	3.23152	3.49076	3.66946	3.61143	4.49057	4.41092	4.40151	2.61224	2.63595	2.65605	3.50809	3.49195	3.18074	2.6992	2.66566	2.73944	5.87592	5.63513	5.51658	3.5349	3.57295	3.48558
Retrotransposon	LTR	Gypsy	Gypsy	Gypsy1-SM_I_invrep	2.185460091	2.014903021	2.079441542	3.441404787	3.509055775	3.896344741	1.508511994	1.504077397	1.4663363	1.817077902	2.136964889	1.881786018	1.44238401	1.499234578	1.098612289	2.501435952	1.4663363	1.704748092	1.810108426	1.386294361	1.229947521	1.580449787	1.969441112	2.238681037	4.432978746	4.228292535	5.264760583	1.241713577	1.098612289	1.098612289
Retrotransposon	LTR	Gypsy	Gypsy	Gypsy10-LTR_SP_spurep	4.674901451	4.703203926	4.853404319	3.255527857	3.016113165	3.447718306	4.65396035	4.683981366	4.698205052	6.120589684	6.352746114	6.308526401	4.888339592	4.976733742	4.79230514	5.390591123	4.779123493	4.5666601	4.510859507	4.620925418	4.168943247	5.371256442	5.385302077	4.986766009	2.582887503	2.824771933	2.698477865	5.487755209	5.315828154	5.182906515
Retrotransposon	LTR	Gypsy	Gypsy	Gypsy105-LTR_Dr_zebrep	1.098612289	1.504077397	0	0	0	0	0	0	0	0	0	0	1.098612289	0	0	0	0	0	0	0	0	1.609437912	1.098612289	0	5.633002293	5.552959585	5.468060141	0	1.098612289	1.098612289
Retrotransposon	LTR	Gypsy	Gypsy	Gypsy11-I_Dpse_invrep	1.791759469	1.550598322	2.014903021	1.098612289	1.860752118	1.791759469	1.550598322	1.887069649	1.985914895	6.100114895	2.944438979	3.487812291	2.164964207	1.679642849	2.014903021	1.504077397	1.098612289	1.349925976	1.299283893	1.285196968	1.791759469	2.32238772	2.433613355	2.520000268	1.791759469	1.609437912	1.945910149	2.288196066	2.397895273	2.468099531
Retrotransposon	LTR	Gypsy	Gypsy	Gypsy118-LTR_DR_zebrep	3.438936228	3.354678636	2.76000994	4.752632836	5.081404365	4.975201535	1.791759469	1.280933845	1.435084525	1.236761337	1.098612289	2.423536438	2.00148	2.159484634	2.367123927	1.098612289	1.686398954	1.098612289	1.349925976	2.344549155	1.845826164	1.526056303	1.526056303	1.098612289	0	1.734601644	1.098612289	2.726917751	2.282382386	2.32238772
Retrotransposon	LTR	Gypsy	Gypsy	Gypsy12-VV_I_dcotrep	3.64508	3.60614	3.67159	2.63557	2.53311	2.4562	3.43859	3.29246	3.1793	2.10569	2.58499	3.19496	2.82402	2.70548	3.14289	3.56558	2.92129	2.86932	4.29309	4.30756	4.35105	2.95539	3.07627	2.78108	5.42706	5.44343	5.27306	2.53898	2.96675	3.13388
Retrotransposon	LTR	Gypsy	Gypsy	Gypsy122-I_DR_zebrep	3.548979252	4.019382123	4.212127598	2.564949357	2.785011242	3.610917913	3.283415596	2.944438979	2.89652501	4.485421094	4.373657965	5.389984555	4.025351691	3.652101355	4.934473933	4.130355	3.378723389	3.632309103	2.351375257	3.310543013	2.48490665	3.784189634	3.08190997	4.014579594	3.433987204	2.944438979	2.944438979	3.590439381	3.626243123	4.127134385
Retrotransposon	LTR	Gypsy	Gypsy	Gypsy123-I_DR_zebrep	6.11368	6.31319	6.34822	4.43478	4.71223	4.44265	5.12488	4.30161	4.71284	2.74084	3.772	4.5117	3.25074	3.49795	3.05636	1.76359	2.07944	1.38629	1.81238	2.23907	1.79176	1.98787	2.48491	2.30259	2.30259	2.41459	2.51122	5.18924	4.68539	4.96459
Retrotransposon	LTR	Gypsy	Gypsy	Gypsy134-LTR_DR_zebrep	3.250374492	3.305053521	3.327087871	4.764615396	4.935674651	5.287706267	2.282382386	2.662585501	2.581897235	1.78379114	2.53742794	2.538976503	2.50395736	2.233591864	2.360854001	2.151762203	1.545924999	2.268683886	2.586688269	3.191845783	2.908719078	2.833213344	2.335374593	2.367123927	1.99242971	2.549445171	1.945910149	2.908719078	3.258096538	2.535678975
Retrotransposon	LTR	Gypsy	Gypsy	Gypsy14-VV_I_dcotrep	1.4061	1.80615	1.18784	2.82534	2.93386	2.74396	5.68964	5.35233	5.52943	4.68145	4.63473	4.41591	3.71154	3.97111	4.14841	2.15948	2.01757	1.9548	5.41205	5.01386	4.82831	2.5096	1.8894	1.94591	5.88165	5.83916	5.773	1.89256	2.2465	1.92369
Retrotransposon	LTR	Gypsy	Gypsy	Gypsy149-I_DR_zebrep	1.280933845	1.223775432	1.335001067	4.890349128	4.333361463	5.294740979	0	1.098612289	1.098612289	1.435084525	0	1.098612289	1.550598322	1.335001067	1.098612289	0	0	1.098612289	1.098612289	1.098612289	1.098612289	1.098612289	1.098612289	1.098612289	0	1.098612289	0	1.098612289	1.609437912	1.098612289
Retrotransposon	LTR	Gypsy	Gypsy	Gypsy152B-LTR_DR_zebrep	3.80109	3.91772	3.96556	2.99573	1.51983	2.23359	3.59927	3.79709	3.15396	4.40367	5.08451	4.84222	3.50083	3.72167	3.84303	2.19722	1.51983	1.67398	2.61496	2.95193	2.89037	3.41773	3.77768	3.53473	1.83828	1.99243	1.58045	3.05636	2.584	3.23868
Retrotransposon	LTR	Gypsy	Gypsy	Gypsy17-PTR_I_dcotrep	1.41447	1.77025	1.85456	1.89417	1.68286	2.22762	6.34487	6.07113	6.35358	3.41499	3.49853	3.88328	3.81805	3.90265	3.66868	2.61007	2.95027	2.96294	6.6751	6.68443	6.6335	3.23475	3.77797	3.3123	3.39163	3.4012	3.90629	4.27254	4.58594	4.43621
Retrotransposon	LTR	Gypsy	Gypsy	Gypsy17-ZM_I_grasrep	0	1.04145	1.38629	1.63142	1.71979	1.81011	6.77445	6.72215	5.93719	1.55814	1.16315	1.06784	2.85263	2.00533	2.05412	1.20397	1.66916	1.23214	5.81996	5.63133	6.1956	0.693147	1.32567	0.99853	0.693147	0.693147	0	1.64412	1.94591	2.37955
Retrotransposon	LTR	Gypsy	Gypsy	Gypsy19-I_SP_spurep	4.744932128	5.207297968	4.641762448	1.4663363	1.098612289	1.098612289	1.098612289	1.098612289	1.098612289	2.412936135	3.33220451	2.606054389	1.609437912	1.098612289	1.609437912	0	0	0	0	0	1.335001067	0	1.860752118	1.098612289	1.098612289	2.251291799	2.079441542	1.945910149	2.140066163	0
Retrotransposon	LTR	Gypsy	Gypsy	Gypsy2-PP_I_plnrep	2.4301	2.53142	2.70113	3.52776	3.65108	3.4012	3.6729	3.71705	3.28698	3.62563	4.27406	4.42715	3.10943	2.92371	3.28124	2.22642	2.27727	2.36085	3.23868	3.12152	3.37698	2.03204	2.04629	2.23359	2.8622	2.95193	3.18989	5.73872	5.7668	5.73833
Retrotransposon	LTR	Gypsy	Gypsy	Gypsy2-ZM_I_grasrep	0	0.693147	0.693147	0.750307	0.693147	0.693147	4.05573	3.72038	4.07996	2.85263	2.89037	1.79176	5.27633	5.64772	5.3373	1.80555	2.08939	2.14007	4.1463	4.2728	4.25436	1.18377	1.56398	1.1421	0	0.693147	0	4.33686	4.38289	3.99169
Retrotransposon	LTR	Gypsy	Gypsy	Gypsy20_ZM_I_grasrep	2.7213	2.93119	3.12676	3.03255	2.92674	3.80348	3.82319	3.94158	4.15104	4.56174	5.32788	5.38335	4.33238	4.31749	4.32045	3.2581	2.79728	2.59525	4.05779	4.79372	4.48017	3.07578	2.56495	2.28578	0	0	0	3.34855	4.32634	3.73767
Retrotransposon	LTR	Gypsy	Gypsy	Gypsy20-LTR_SP_spurep	4.3408	4.50166	4.40265	3.10743	2.7496	2.92998	4.97212	5.00618	4.65616	5.28827	6.35813	6.27946	4.88154	4.9464	4.99383	3.66356	3.76331	3.81404	4.65078	4.50535	4.5486	4.79854	4.97212	4.59745	2.53898	3.02264	2.51476	4.29729	4.50585	4.36522
Retrotransposon	LTR	Gypsy	Gypsy	Gypsy21-I_SP_spurep	3.158416439	3.676300672	3.81220267	3.020424886	2.818398258	2.669212348	2.990161787	2.751537441	3.102342009	3.80666249	3.228826156	3.091042453	3.457892725	3.398162782	3.610917913	4.157145637	4.454347296	4.136765278	2.494122387	2.833213344	3.091042453	4.3204464	4.3204464	4.045971561	4.954064943	4.839886514	5.017279837	3.008154794	3.095165759	3.397487174
Retrotransposon	LTR	Gypsy	Gypsy	Gypsy21-PTR_I_dcotrep	4.49495	4.95583	4.58111	4.10345	4.16827	4.12657	2.47444	2.95565	2.81198	2.96075	3.19023	2.77259	3.38922	3.31279	3.40886	2.11021	1.76191	2.22938	3.16066	3.23587	3.12541	1.89712	2.13848	2.30259	5.26876	5.45318	5.48403	2.64696	2.88294	2.64998
Retrotransposon	LTR	Gypsy	Gypsy	Gypsy22-VV_I_dcotrep	3.33888	3.32588	3.11448	4.07808	4.2521	4.0444	4.11976	3.97263	4.00904	3.63016	3.69016	3.80073	5.00356	4.97479	4.78346	3.0985	3.12325	2.907	3.93331	4.16925	3.97984	3.1508	3.20609	3.27754	2.32327	2.23538	2.27636	4.72153	4.61859	4.65625
Retrotransposon	LTR	Gypsy	Gypsy	GYPSY23-I_AG_angrep	1.098612289	0	0	1.098612289	0	0	0	1.098612289	0	6.12905021	5.313205979	5.942799375	1.098612289	1.098612289	1.098612289	0	0	0	0	0	0	0	0	0	0	0	1.098612289	0	0	1.098612289
Retrotransposon	LTR	Gypsy	Gypsy	Gypsy23-ZM_I_grasrep	3.15506	3.20791	3.03412	0.693147	0.693147	0.693147	1.92611	1.91692	2.30259	1.50991	2.2162	2.33767	3.67931	3.31279	4.05798	1.18784	1.15268	1.49165	2.07944	2.34993	2.05045	0.823201	1.90298	1.06471	5.75257	5.58992	4.90739	1.31219	1.7346	1.24521
Retrotransposon	LTR	Gypsy	Gypsy	Gypsy24-ZM_I_grasrep	1.098612289	1.098612289	1.098612289	3.145108718	3.200243313	2.967559111	1.098612289	0	0	1.815290432	2.627078729	2.694627181	1.098612289	1.098612289	1.349925976	1.540445755	2.397895273	2.367123927	0	0	0	2.667228207	2.58021683	2.007467445	4.946729462	4.55004218	5.533389489	1.945910149	1.098612289	1.098612289
Retrotransposon	LTR	Gypsy	Gypsy	Gypsy28-ZM_I_grasrep	3.57002	3.37785	3.49651	2.43142	2.37079	2.61353	1.34373	1.52939	1.71979	3.2581	2.50325	3.37872	4.7088	4.84786	5.27057	0	0.693147	0	1.57351	1.80829	2.10006	1.60944	0	0.693147	1.72277	2.48491	2.70805	3.66924	3.45527	3.28627
Retrotransposon	LTR	Gypsy	Gypsy	Gypsy29-ZM_I_grasrep	4.05814	3.51898	3.79684	5.5999	5.18612	5.37171	1.97202	2.10684	2.23359	2.11453	1.77978	2.11581	1.79176	1.32914	0.693147	2.04307	1.79176	1.79176	2.41747	2.12389	2.06263	1.38629	0.693147	1.56862	1.68355	1.88031	2.23359	2.21102	2.1366	1.97408
Retrotransposon	LTR	Gypsy	Gypsy	GYPSY3-I_MT_edcotrep	3.90399	3.76568	3.58078	3.6173	3.63553	3.76745	3.60122	3.61527	3.38439	3.62144	2.97289	3.82056	3.3217	3.64326	3.49098	3.34208	3.37633	3.5241	3.71579	3.44331	3.31782	3.63759	3.47266	3.82864	2.64397	2.65733	3.3596	5.27281	5.2393	4.91939
Retrotransposon	LTR	Gypsy	Gypsy	Gypsy3-I_VC_plnrep	1.02962	1.06784	2.3979	0.693147	1.29928	0.693147	5.24702	5.15659	5.04643	3.86598	4.29274	3.57452	1.8777	2.11021	1.93694	2.67101	3.44681	3.20704	4.91779	5.22575	5.23971	3.70541	3.00678	3.16407	0.693147	0.693147	0	4.03803	3.43399	4.0892
Retrotransposon	LTR	Gypsy	Gypsy	Gypsy3-VV_I_dcotrep	0.693147	0.693147	1.79176	3.48927	3.61933	3.35166	4.83364	5.01948	4.75072	2.22708	2.58022	2.7213	1.09861	1.38629	0.693147	0.693147	1.28093	1.16315	4.03628	4.76786	4.79303	0	0	0.693147	2.60554	2.52573	1.67398	0	1.20397	0
Retrotransposon	LTR	Gypsy	Gypsy	Gypsy33-ZM_I_grasrep	1.65596	0.693147	1.77406	2.05839	1.86915	1.99243	2.89037	2.89037	3.24705	1.06784	0.693147	0	5.93622	5.91665	6.02674	1.79176	1.7346	1.38629	2.61496	3.18498	3.10493	0.693147	1.38629	2.03688	0	0	0	2.14007	2.61496	2.38262
Retrotransposon	LTR	Gypsy	Gypsy	Gypsy35-ZM_I_grasrep	5.174266605	5.250528451	4.817592469	1.098612289	1.098612289	1.098612289	0	0	0	0	0	0	1.098612289	1.272966076	1.609437912	0	0	0	0	0	0	0	0	1.098612289	0	0	0	1.349925976	0	1.098612289
Retrotransposon	LTR	Gypsy	Gypsy	GYPSY38-I_AG_angrep	0	0	0	5.41419	5.42306	5.53282	0.693147	0	0	0	0	0	0	0	0	0	0	0	0	0	0	0	0	0	0	0	0	0	0	0
Retrotransposon	LTR	Gypsy	Gypsy	Gypsy4-I_SP_spurep	3.64805746	3.268808194	4.009927998	2.80223854	3.32323584	2.971762275	3.993383614	3.603520348	2.847232265	4.690788093	5.984731934	5.689304844	3.485912235	4.258647816	4.602667056	5.237893037	4.262679877	3.617651945	5.660255436	4.355425953	4.946096773	3.823611376	3.829586602	4.097672352	4.376654732	4.067166906	4.898772201	4.30019681	4.012170557	3.208825489
Retrotransposon	LTR	Gypsy	Gypsy	Gypsy4-VV_I_dcotrep	2.43979	2.77259	2.61191	1.5724	2.00882	1.77495	3.68997	3.91202	3.8712	3.96308	3.81291	3.78197	2.70805	3.11668	3.34236	1.71008	1.98707	2.26665	3.27455	3.3416	3.79581	2.27133	4.11415	3.22972	5.21183	5.17719	5.02116	1.51635	1.81529	1.60944
Retrotransposon	LTR	Gypsy	Gypsy	Gypsy40-ZM_I_grasrep	1.83468485	1.727220948	1.714799228	2.197224577	1.958813682	2.087740758	1.496643165	1.339773869	1.098612289	2.31677001	2.397895273	2.34960989	5.762460104	5.410636614	5.333013436	1.954277899	2.392012549	2.13750524	1.408767439	1.299283893	1.399366053	2.093871921	2.093234727	2.84912722	1.791759469	2.302585093	2.397895273	3.231108697	3.254887549	3.250374492
Retrotransposon	LTR	Gypsy	Gypsy	GYPSY42-I_AG_angrep	1.79176	1.06784	2.30259	1.69168	1.38629	0	1.38629	0.693147	1.38629	0.693147	0.693147	0	1.83258	2.30259	2.03688	0	1.06784	0	0.693147	0.693147	1.34993	0.693147	0.693147	0.693147	2.33075	0.693147	1.58045	5.08052	4.8828	4.78749
Retrotransposon	LTR	Gypsy	Gypsy	Gypsy42-ZM_I_grasrep	0	1.098612289	0	0	0	1.098612289	0	0	0	1.609437912	0	0	1.098612289	0	0	0	0	1.098612289	0	0	0	0	1.098612289	1.098612289	0	0	0	5.164785974	4.976733742	5.105945474
Retrotransposon	LTR	Gypsy	Gypsy	Gypsy5-VV_I_edcotrep	0	0	0	0	1.098612289	0	0	1.098612289	0	0	0	1.098612289	5.25691708	5.285738584	5.370638028	2.181223913	2.747270914	2.084861825	0	0	0	3.481240089	3.187624551	3.235874525	1.098612289	0	0	1.098612289	0	1.098612289
Retrotransposon	LTR	Gypsy	Gypsy	Gypsy6-NVi_LTR_invrep	5.48249	5.56898	5.72327	4.44787	4.61402	4.35543	4.61772	4.65646	4.62497	2.81341	3.767	4.04989	3.93574	3.71628	3.83105	0	0.693147	0	0.961409	1.72277	1.02962	1.50408	1.95684	1.28093	2.45893	2.64742	2.71635	4.85437	4.82874	4.89232
Retrotransposon	LTR	Gypsy	Gypsy	Gypsy6-VV_I_dcotrep	2.84913	2.73822	2.92427	2.85143	2.93916	2.2796	3.71669	3.56803	3.61826	6.00773	5.66707	5.34505	4.58682	4.37817	4.4045	2.13073	2.36321	2.36321	3.55703	3.30185	3.47635	2.2736	2.02815	1.8045	5.48778	5.62387	5.53302	3.31621	3.30539	3.06868
Retrotransposon	LTR	Gypsy	Gypsy	GYPSY61-I_AG_angrep	3.80348	3.48636	3.8238	1.67398	2.07944	2.28011	1.63142	1.86322	1.04982	1.13498	2.14007	1.79176	6.73177	6.68986	6.67894	3.17805	3.13065	3.03922	2.00533	1.14513	2.40794	3.09104	3.62582	3.74295	0.693147	1.38629	0	7.36414	7.42811	7.87649
Retrotransposon	LTR	Gypsy	Gypsy	Gypsy65-ZM_I_grasrep	3.93492	3.88859	3.85721	2.42501	2.66026	2.72032	3.41025	3.12248	3.15948	3.19587	3.85695	3.80933	4.22177	4.37627	4.3338	3.97086	3.41324	3.61817	3.2845	3.46574	3.43352	3.51261	3.88354	3.84733	5.24084	5.15632	4.92498	4.10773	3.81017	3.9441
Retrotransposon	LTR	Gypsy	Gypsy	Gypsy7-I_Dya_invrep	4.89784	4.98361	4.92484	4.23893	4.18459	4.22926	4.9396	4.73118	4.33312	3.39003	4.48864	5.13776	4.97212	4.88784	4.59078	0	0.693147	1.28093	2.48491	2.23359	1.64866	2.79728	1.60944	1.91692	3.35574	3.32023	3.80666	4.49344	4.14991	4.28013
Retrotransposon	LTR	Gypsy	Gypsy	Gypsy7-VV_I_dcotrep	2.40103	2.52936	2.29669	1.09861	1.2771	1.63611	3.94507	3.6579	3.55414	4.68857	4.10151	4.16621	4.11496	4.16186	3.63203	2.04307	2.48491	2.22109	3.87882	3.74491	3.79709	2.35291	2.57085	2.7554	5.75434	5.76999	5.92374	1.90617	1.27123	1.44345
Retrotransposon	LTR	Gypsy	Gypsy	Gypsy76-I_DR_zebrep	0	1.38629	0	1.67398	0.693147	2.48491	5.28971	5.53733	5.46242	0	0	0	1.38629	0.693147	1.60944	0	0	0	4.99475	5.44386	5.63835	0.693147	0	0	0	0	0	0.693147	1.38629	0
Retrotransposon	LTR	Gypsy	Gypsy	Gypsy8-PTR_I_dcotrep	2.28646	1.85813	1.74297	3.74645	3.64059	3.97298	2.47609	2.22708	1.92403	2.40486	2.72504	3.03717	4.82078	5.23998	4.71426	2.12823	1.64516	2.10142	3.41773	2.96183	2.74406	2.65324	2.35815	2.23614	2.48491	0.693147	0	2.56495	2.59026	3.22612
Retrotransposon	LTR	Gypsy	Gypsy	Gypsy81-LTR_Dr_zebrep	1.098612289	0	1.098612289	0	1.098612289	0	1.098612289	0	0	5.334649296	1.098612289	1.609437912	0	0	1.098612289	1.098612289	0	0	0	0	0	1.098612289	1.386294361	1.098612289	0	0	0	0	0	0
Retrotransposon	LTR	Gypsy	Gypsy	Gypsy82-LTR_Dr_zebrep	4.71466116	4.964242255	4.868818241	5.180844908	5.125338035	4.953810942	3.529622845	3.828641396	3.590439381	3.76541911	4.088774076	4.527809545	4.134023504	3.68609809	3.909798533	3.978641861	4.023365792	3.854864121	3.227724559	3.496507561	3.100092289	3.826223258	3.978641861	3.528619735	3.07577652	2.691243083	2.756840365	3.976560902	3.949104894	3.988984047
Retrotransposon	LTR	Gypsy	Gypsy	Gypsy84-I_DR_zebrep	3.58748	3.81928	3.68171	3.5711	3.32424	2.97041	5.02012	4.72599	5.16192	2.14316	2.19722	2.10542	1.69867	2.14007	1.41908	2.79998	2.18864	2.77259	4.43872	4.41401	4.50098	3.00339	3.24086	2.88179	2.12389	1.34373	2.05839	3.03769	3.24705	2.62801
Retrotransposon	LTR	Gypsy	Gypsy	Gypsy89-I_DR_zebrep	1.098612289	1.558144618	1.369486395	1.098612289	0	0	0	1.098612289	1.609437912	1.512587747	1.386294361	1.098612289	5.195730778	6.02827852	5.926926026	2.533696814	2.054123734	2.1690537	0	1.098612289	0	2.890371758	2.240709689	2.772588722	0	1.098612289	1.550598322	1.098612289	1.098612289	1.098612289
Retrotransposon	LTR	Gypsy	Gypsy	Gypsy9-I_VC_plnrep	1.38629	1.06087	1.38629	0	0	0	4.33073	4.64118	4.49237	5.64191	5.35776	4.66074	3.13065	2.67277	3.66868	2.20728	1.82161	1.8563	3.48636	3.56483	3.64632	2.63906	1.8718	1.4816	1.38629	0.693147	0	4.4006	4.55538	3.3379
Retrotransposon	LTR	Gypsy	Gypsy	Gypsy98-LTR_Dr_zebrep	3.369672314	3.838886561	3.594772051	3.589909586	3.308822556	2.79971739	3.48635621	4.06731589	3.479527855	4.346798341	5.006459923	4.837075243	3.477034334	3.542277296	3.725119769	4.452684286	3.981015344	3.540196714	3.744141488	3.496507561	3.357395257	3.448542057	3.383583158	3.415757533	3.376252154	3.634658193	3.674892085	3.677707277	3.356346449	3.008806433
Retrotransposon	LTR	Gypsy	Gypsy	GYVIT1_I_dcotrep	3.63599	3.30505	3.3673	2.75101	3.26872	2.68186	4.40305	4.48201	4.66989	3.46782	2.99876	3.22824	2.87023	2.9598	3.28725	2.54646	2.0149	2.32834	4.17857	4.08766	4.29752	1.71008	2.42775	2.37404	6.32975	6.4702	6.60621	2.24583	2.62417	2.14352
Retrotransposon	LTR	Gypsy	Gypsy	GYZMA1_I_grasrep	3.94158	3.39163	4.10853	2.34857	2.64696	2.63109	3.29298	2.89037	2.87168	3.48343	5.22843	4.42125	6.8343	7.05244	7.07546	2.68318	2.57134	2.8113	3.29213	3.2884	3.41167	3.39872	3.53806	3.49953	0	0	0	3.3185	3.64236	3.42318
Retrotransposon	LTR	Gypsy	Gypsy	INVADER3_I_drorep	0.693147	1.38629	0.693147	1.96611	1.79176	0.693147	3.55852	3.34109	3.77913	5.83611	5.48802	5.38856	2.97041	2.82336	2.73003	2.11453	1.69168	0.693147	3.41444	3.89409	3.95975	2.42037	2.23359	2.99573	2.05839	1.76359	1.79176	1.38629	1.29928	1.44692
Retrotransposon	LTR	Gypsy	Gypsy	INVADER5_I_drorep	1.504077397	1.504077397	1.349925976	0	1.098612289	1.098612289	0	0	1.098612289	6.773652294	7.686988408	7.375700541	1.734601644	1.815290432	1.815290432	0	0	1.098612289	0	0	1.098612289	0	0	1.609437912	0	1.098612289	0	4.025351691	4.33073334	3.626243123
Retrotransposon	LTR	Gypsy	Gypsy	M2_VM_edcotrep	3.98048	4.11512	3.87793	3.48738	3.75846	3.70165	2.03688	2.61496	3.06473	3.46182	2.31501	2.63282	4.26268	4.79461	4.50976	2.87437	2.41215	2.57007	2.09714	2.18122	2.59026	2.31983	3.2581	2.75777	3.63759	3.80261	3.86073	6.48865	6.63332	6.50571
Retrotransposon	LTR	Gypsy	Gypsy	MEGY-I_MT_edcotrep	1.55335	1.50408	1.32442	3.07459	2.8622	2.80406	4.75789	4.40237	5.17615	4.02535	3.21802	3.29497	4.01708	4.42923	4.46919	3.34011	2.74084	2.79164	5.22198	4.65184	4.72539	3.34698	3.45263	3.45718	3.96328	3.94238	4.07957	4.55505	3.66035	3.79134
Retrotransposon	LTR	Gypsy	Gypsy	NOMAD_I_drorep	5.00058	5.0831	4.81406	3.36236	3.09104	2.87168	3.4761	3.53907	3.18267	3.11	2.91777	4.39308	2.81341	3.26506	4.72358	3.68888	3.68888	3.26506	3.61899	3.47422	3.57367	3.07578	3.20545	2.61007	4.62932	4.66814	4.24372	3.46574	4.16408	3.15167
Retrotransposon	LTR	Gypsy	Gypsy	NUSIF1_TM_grasrep	5.73657	5.50939	5.41499	4.06044	4.2485	4.5372	5.27373	5.39233	5.29115	5.45318	6.04128	6.81908	5.22575	5.06418	5.32788	4.57618	4.64714	4.67416	4.30407	3.42637	4.93344	5.52716	5.59099	5.53056	4.40323	4.2885	4.34812	5.10508	5.21649	5.18818
Retrotransposon	LTR	Gypsy	Gypsy	OGRE-I_PS_edcotrep	5.18076	5.53392	5.31407	6.31545	6.31711	6.40144	3.69567	3.60266	3.66722	2.31628	2.5813	2.54668	3.20545	3.17471	3.03959	2.12334	2.15417	2.47293	4.22265	4.16991	4.38203	2.56495	2.3477	1.97234	5.36406	5.37789	5.35804	3.78831	3.26638	3.47858
Retrotransposon	LTR	Gypsy	Gypsy	Ogre-PT1_I_dcotrep	4.65062	4.69794	4.54478	5.0333	5.18622	4.93722	3.0643	3.157	3.3493	2.47999	2.04769	2.55748	3.09104	3.12161	3.35267	1.62268	1.86727	1.69773	3.63099	3.42386	3.61092	1.86727	2.20133	1.92097	4.80902	4.90486	4.55036	3.62664	3.00881	3.25184
Retrotransposon	LTR	Gypsy	Gypsy	Ogre-PT2_I_dcotrep	2.15756	2.28238	2.6298	4.50228	4.53752	4.68521	2.18979	2.22642	1.86322	2.00248	2.44981	2.53142	1.12601	0.693147	1.14513	1.11803	1.22945	1.63974	3.20376	2.92077	3.24205	1.16857	1.59886	1.38629	5.40093	5.62221	5.44004	2.04307	2.56187	2.40566
Retrotransposon	LTR	Gypsy	Gypsy	Ogre-PT3_I_dcotrep	5.81056	5.81031	5.91935	6.23335	6.29674	6.16743	6.02931	6.09176	6.12872	4.84812	3.22726	3.90701	4.64198	4.52007	4.27591	2.57654	2.74084	2.81479	5.91551	5.83627	5.68552	4.64362	4.92041	4.55707	5.80344	5.61833	5.71005	4.79868	4.89828	5.04053
Retrotransposon	LTR	Gypsy	Gypsy	Ogre-VP1_I_dcotrep	3.37872	3.30366	3.36284	4.30816	4.38606	4.39807	3.27336	3.49171	3.2983	3.04452	4.08478	3.83236	3.94252	3.92484	3.77457	1.35455	1.09861	0.980831	2.04867	1.98199	2.80768	2.48491	1.74047	1.82813	5.22444	5.06194	5.00775	4.23542	3.89995	3.88042
Retrotransposon	LTR	Gypsy	Gypsy	PGGYPSYX1_plnrep	3.85051	3.71441	3.79188	2.45616	2.30688	2.42708	7.40915	7.39914	7.38943	8.33051	8.7137	8.69373	5.07222	5.09686	5.09261	8.01075	7.93464	7.96692	7.61715	7.60412	7.61423	8.21393	8.213	8.21158	0.834799	0	0.958852	5.0649	5.1285	5.10144
Retrotransposon	LTR	Gypsy	Gypsy	PIGY-I_PS_edcotrep	1.72277	1.04145	1.64412	2.62916	2.5686	2.83321	4.11034	4.45987	4.0482	4.07982	3.98336	3.72759	3.66868	3.3322	3.14135	4.2504	3.80221	4.58042	4.65656	5.32362	4.52465	4.9775	4.06372	4.02705	2.40994	2.4108	2.51531	0.693147	1.38629	1.17272
Retrotransposon	LTR	Gypsy	Gypsy	PtRLG_1_D_PIER	1.098612289	0	1.098612289	1.098612289	1.098612289	1.098612289	3.900848806	3.887715968	3.884183045	5.624017506	5.992241745	5.877354757	1.565951956	1.34741319	1.279749811	2.002865526	2.367761223	2.357166077	3.846940336	3.859710244	3.944068035	2.394808696	2.075758518	2.045073933	1.098612289	1.098612289	0	1.7848859	1.922471892	1.768502784
Retrotransposon	LTR	Gypsy	Gypsy	PtRLG_1_PIER	0.693147	0.767257	1.57554	3.64829	3.73631	3.58491	5.31765	5.34424	5.25933	5.65737	5.70254	5.69041	4.45667	4.38132	4.20256	6.63147	6.72694	6.73506	5.0707	5.01874	5.05113	5.97663	6.05687	5.98652	0	0	0	3.25552	3.30528	3.41683
Retrotransposon	LTR	Gypsy	Gypsy	PtRLG_10_B_PIER	1.99243	1.74297	0	1.09861	1.38629	1.20397	4.56657	4.51786	4.5426	5.68352	5.73049	5.73713	3.2199	3.01083	3.05661	5.69341	5.79294	5.743	4.10169	4.13791	4.06833	6.6801	6.72809	6.67887	0	0	0	3.33386	3.27933	3.31721
Retrotransposon	LTR	Gypsy	Gypsy	PtRLG_10_C_PIER	0	1.09861	0	0.693147	0	0	5.34954	5.40197	5.34851	5.96559	6.07396	6.00213	1.88995	2.18122	2.0149	5.10971	5.33864	5.17824	5.24791	5.26751	5.16557	5.1524	5.27552	5.26417	0	0	0	4.97191	4.81533	4.64347
Retrotransposon	LTR	Gypsy	Gypsy	PtRLG_10_PIER	2.56751	2.65622	2.55603	2.45008	2.13541	2.47924	6.57402	6.55786	6.57022	6.29619	6.50307	6.49109	3.8013	3.76248	3.9023	4.873	4.82337	4.83006	6.31516	6.313	6.29114	5.05885	5.05358	5.13046	0.965081	0.786674	1.74297	4.03124	4.10817	3.91894
Retrotransposon	LTR	Gypsy	Gypsy	PtRLG_101_PIER	3.29366	3.45465	3.29171	2.54945	2.64499	2.58834	4.43942	4.5011	4.37909	5.9817	6.35397	6.36459	4.46724	4.31367	4.46386	2.74427	3.3322	3.01926	4.18284	4.26262	4.23921	3.12497	3.19766	3.26126	0	0.693147	0	1.88642	1.52681	1.68328
Retrotransposon	LTR	Gypsy	Gypsy	PtRLG_102_PIER	2.65196	2.62656	2.75828	3.2852	3.11633	3.06898	4.63571	4.63159	4.68246	5.63825	5.72149	5.68595	2.97924	2.8738	2.84705	4.38918	4.32226	4.41291	4.18925	4.26847	4.16842	4.78393	4.80565	4.76142	0.693147	0	0	3.32297	3.22886	3.19514
Retrotransposon	LTR	Gypsy	Gypsy	PtRLG_104_PIER	2.104134154	1.928442764	1.599868269	1.799922726	1.625104547	1.526056303	5.539996076	5.539996076	5.52822201	5.177696558	5.145102082	5.091391593	2.14843458	1.994820034	2.244909369	3.524134519	3.535623374	3.453388107	5.365036321	5.419224406	5.446263121	3.905505815	3.868451401	3.948273929	1.098612289	1.098612289	0	2.123507469	2.104374369	2.078399749
Retrotransposon	LTR	Gypsy	Gypsy	PtRLG_108_PIER	0	0	0	1.116	1.05416	1.41227	3.26812	3.41793	3.33615	4.77243	5.35986	5.25345	2.64655	2.90799	2.69586	4.16193	3.68736	3.93444	3.23114	3.14415	3.19667	5.58317	5.58396	5.4257	0	0	0	2.97463	2.97006	2.69515
Retrotransposon	LTR	Gypsy	Gypsy	PtRLG_11_B_PIER	1.098612289	0	1.845826164	1.829499921	1.4663363	1.785070481	4.16311941	4.121619204	4.164377337	3.828154321	3.850681502	3.899310543	3.851803676	3.870073292	3.740838402	5.8379724	5.780135306	5.639588783	4.148823278	4.218015416	4.201762959	5.623266322	5.566919825	5.630465984	0	0	0	4.519835584	4.203173556	4.066344528
Retrotransposon	LTR	Gypsy	Gypsy	PtRLG_11_C_PIER	2.41591	2.66723	2.40612	2.84266	2.82177	2.77872	4.62595	4.57984	4.64115	5.14161	5.19718	5.11573	3.22738	3.19002	3.15726	5.20004	5.02479	4.98541	4.30752	4.29909	4.32117	5.17836	5.16741	5.2206	1.52606	1.60944	1.14513	3.39101	3.44422	3.42715
Retrotransposon	LTR	Gypsy	Gypsy	PtRLG_115_PIER	1.27673	2.05907	1.75276	3.1506	3.27867	3.27565	5.01946	5.0196	5.03097	6.57042	6.24721	6.24083	3.74024	3.81037	3.89891	5.38745	5.40946	5.40116	4.69156	4.63361	4.69493	6.51927	6.52499	6.5583	0	0	0.693147	4.08317	4.0202	4.0442
Retrotransposon	LTR	Gypsy	Gypsy	PtRLG_116_PIER	4.21079	4.29106	3.87594	4.22837	4.10637	4.25402	4.58734	4.61467	4.60875	5.68494	5.51725	5.5424	4.26082	4.28623	4.25239	4.73914	4.65798	4.72816	4.09038	4.03908	3.99878	5.76312	5.67002	5.72429	0.693147	0	1.7346	3.84231	3.75401	3.78125
Retrotransposon	LTR	Gypsy	Gypsy	PtRLG_119_PIER	1.88607	1.95327	2.30997	3.4165	3.27363	3.42406	4.46424	4.50532	4.54301	5.12107	5.07073	5.02678	2.69528	2.6564	2.67007	4.21267	4.10027	4.12934	4.26026	4.31623	4.28577	4.80292	4.82719	4.79006	1.91692	1.98787	1.54592	2.8622	2.95566	2.89618
Retrotransposon	LTR	Gypsy	Gypsy	PtRLG_12_B_PIER	1.098612289	0	0	1.098612289	1.098612289	1.386294361	3.754079475	3.70766686	3.848704007	3.661790848	3.88049725	3.872637479	1.315676062	1.413693065	1.913649615	5.430003307	5.448016725	5.268528038	3.591489864	3.646618925	3.77917024	5.512621969	5.575846825	5.595562319	0	0	0	1.926679273	1.794899534	2.226812505
Retrotransposon	LTR	Gypsy	Gypsy	PtRLG_12_PIER	2.95396	3.0873	2.68687	3.29359	3.44481	3.31813	5.28144	5.26477	5.27754	6.67889	6.72411	6.70241	4.2558	4.28856	4.27069	5.03423	5.08371	5.03195	5.05445	5.02403	5.05191	6.10822	6.13437	6.17059	0.693147	0.693147	0	4.61212	4.6502	4.62411
Retrotransposon	LTR	Gypsy	Gypsy	PtRLG_122_PIER	0.693147	0.693147	0	1.19214	1.64412	0.693147	5.71678	5.81342	5.79467	4.27744	4.79659	4.87543	2.87667	2.49764	3.03042	4.79945	4.37934	5.20301	5.65593	5.66815	5.76277	4.68865	4.94757	4.09607	0.693147	0	0	2.78809	2.49387	2.03944
Retrotransposon	LTR	Gypsy	Gypsy	PtRLG_124_PIER	0.693147	0.693147	0	0.900787	1.38629	1.64223	5.60665	5.60021	5.65438	4.18422	4.59355	4.45977	2.48491	2.50503	2.21297	3.67063	3.18352	3.21833	5.35743	5.34394	5.32156	3.46433	3.24612	3.54041	0.693147	0.693147	0	2.3857	2.03499	2.1363
Retrotransposon	LTR	Gypsy	Gypsy	PtRLG_126_PIER	2.0667	2.20234	2.16737	1.64392	1.58346	1.71411	4.1531	4.21987	4.23095	5.07486	5.28818	5.31169	4.19502	4.16817	4.25281	4.57901	4.4961	4.51353	4.48737	4.46623	4.5116	4.9876	4.94809	4.97034	0.906721	0.693147	0	3.74129	3.74545	3.73891
Retrotransposon	LTR	Gypsy	Gypsy	PtRLG_129_PIER	1.15268	1.09362	1.65823	1.63913	1.64683	1.58382	5.45196	5.45092	5.47425	3.19265	3.17058	3.34353	2.96919	2.81004	3.20107	1.5221	1.50122	1.37708	5.56168	5.54872	5.57558	1.70475	1.73884	1.76662	2.25712	2.7496	2.56013	1.09861	1.25846	1.18958
Retrotransposon	LTR	Gypsy	Gypsy	PtRLG_13_B_PIER	0	0	0	0	0.693147	0	5.27334	5.36189	5.32724	4.03441	4.36144	4.23103	2.52783	2.70805	2.47609	3.63099	3.75118	3.54458	5.20689	5.14568	5.15234	3.60753	3.64741	3.55177	0	0	0	2.35138	2.84858	2.33408
Retrotransposon	LTR	Gypsy	Gypsy	PtRLG_13_PIER	4.15272	3.72167	3.64583	4.18936	4.05612	4.14155	6.73737	6.70997	6.72548	6.23196	5.95883	5.93358	4.01936	4.01425	4.03722	4.72022	4.78378	4.72921	6.41843	6.42031	6.40733	5.74506	5.81909	5.75927	0.693147	0.693147	0.693147	4.27535	4.23229	4.22068
Retrotransposon	LTR	Gypsy	Gypsy	PtRLG_131_PIER	2.20759	2.46875	1.96118	3.38059	3.47469	3.35807	4.40959	4.40274	4.33991	5.73556	5.64637	5.6331	2.8776	2.84997	2.87115	3.85121	3.77002	3.92197	3.9989	4.02155	3.98898	4.27467	4.22789	4.33194	0.693147	0.693147	0.693147	3.41143	3.46936	3.50058
Retrotransposon	LTR	Gypsy	Gypsy	PtRLG_135_PIER	1.778856584	1.845826164	1.34117408	2.410219022	2.57323036	2.591935773	5.328303262	5.372013825	5.363065241	2.748180757	2.509493566	2.460152785	3.002375161	3.212821535	3.032155809	2.590692075	3.065645388	2.961575517	5.830694088	5.678471504	5.723689672	2.929982352	2.964958584	2.908719078	1.742970055	1.804497989	1.386294361	1.669156712	1.798404012	2.151762203
Retrotransposon	LTR	Gypsy	Gypsy	PtRLG_14_B_PIER	0.693147	0	1.38629	1.38629	0.693147	1.09861	5.04346	5.01909	4.99254	3.83346	3.99189	3.97172	1.72277	1.89139	1.76929	3.07064	3.44822	3.56705	4.78863	4.79497	4.86201	2.98515	3.37092	3.41303	0	0	0	3.0876	3.07885	2.9526
Retrotransposon	LTR	Gypsy	Gypsy	PtRLG_14_E_PIER	1.93747	2.2736	1.46634	1.29928	0.693147	0	5.53084	5.54033	5.56057	3.81071	4.41776	4.21138	5.56332	5.14166	5.04592	5.11756	5.4773	4.99859	5.5092	5.45323	5.448	4.66209	4.62497	4.72528	0.693147	0	0	2.49804	2.52783	2.60914
Retrotransposon	LTR	Gypsy	Gypsy	PtRLG_14_PIER	5.25898	4.076	4.65078	2.42037	2.23197	1.9711	6.13359	6.08785	6.14865	4.63792	4.68017	4.74421	3.28911	3.48106	3.41317	2.60004	2.91677	2.64893	5.9174	5.92248	5.86471	2.7146	2.50303	2.5721	1.74297	1.92529	1.8563	2.20437	1.81321	2.14436
Retrotransposon	LTR	Gypsy	Gypsy	PtRLG_141_PIER	3.62385	3.6579	3.86248	4.52587	4.66463	4.44642	5.75938	5.77445	5.80378	5.92118	5.80472	5.75378	4.11812	4.1625	4.11762	4.82465	4.84636	4.91476	5.16451	5.13879	5.15257	5.72578	5.65527	5.7274	0	0.693147	0.693147	4.25699	4.20242	4.10406
Retrotransposon	LTR	Gypsy	Gypsy	PtRLG_142_PIER	4.51858	4.27546	4.38167	3.78188	3.78543	3.81384	6.04902	6.05547	6.0796	6.24293	5.82584	5.80616	3.51398	3.4971	3.47985	4.95519	4.84501	4.87233	5.63101	5.64465	5.64313	6.24256	6.26748	6.21697	0.693147	0.693147	0.693147	3.54534	3.64264	3.70865
Retrotransposon	LTR	Gypsy	Gypsy	PtRLG_147_PIER	0.693147	0	0	0.693147	1.67398	0	5.16013	5.20077	5.18025	3.9032	3.99283	4.02556	2.78566	2.91777	2.59384	3.38842	3.21523	2.9693	4.94557	4.85115	4.88704	3.61527	3.49969	3.68679	0	0	0	0.885039	0.864997	1.54756
Retrotransposon	LTR	Gypsy	Gypsy	PtRLG_15_D_PIER	0	0	0	0	0	0	4.69165976	4.696463217	4.701407209	0	0	0	0	0	0	0	0	0	5.044192564	5.081932176	5.118502665	0	0	0	0	0	0	0	0	0
Retrotransposon	LTR	Gypsy	Gypsy	PtRLG_150_PIER	2.36452	2.74592	2.59205	3.36267	3.53223	3.48982	4.68085	4.67609	4.71557	6.20996	6.21669	6.21679	3.88804	3.86976	3.88716	4.2258	4.30659	4.17947	4.25404	4.3436	4.27059	5.3185	5.34364	5.3708	2.07944	0.693147	0.693147	3.73193	3.72907	3.7605
Retrotransposon	LTR	Gypsy	Gypsy	PtRLG_153_PIER	0.693147	1.31219	0.693147	0.693147	0.693147	1.09861	5.88064	5.86368	5.8819	3.69442	3.51216	3.47642	4.06755	3.86257	4.35991	1.90954	1.98311	2.21297	5.28139	5.30024	5.33279	1.73257	1.7336	2.06939	0.693147	0	0	1.17865	1.36098	1.29928
Retrotransposon	LTR	Gypsy	Gypsy	PtRLG_16_B_PIER	1.38629	1.35239	1.54045	0.693147	0.693147	0.693147	4.35087	4.29965	4.34933	4.07243	4.18345	4.1707	4.21331	4.62986	4.37143	5.06438	5.01564	4.89012	3.83353	3.88484	3.90409	5.49937	5.43392	5.56689	0	0	0	3.08274	3.21782	2.99649
Retrotransposon	LTR	Gypsy	Gypsy	PtRLG_161_PIER	2.01088	2.04108	2.14339	2.21406	1.97912	2.2896	5.49969	5.49281	5.52749	6.32354	6.33097	6.28547	3.67047	3.76274	3.68625	5.09088	4.96062	5.07517	4.9815	4.96674	4.96114	6.09811	6.12126	6.1216	0	1.38629	0.693147	3.17543	3.12173	3.16341
Retrotransposon	LTR	Gypsy	Gypsy	PtRLG_165_PIER	3.68228	3.33824	3.21758	2.73042	2.80529	2.79182	4.76945	4.76606	4.82948	5.18869	5.17628	5.19036	3.64243	3.58623	3.56194	5.7983	5.80092	5.79934	4.63397	4.59653	4.60209	6.29498	6.35058	6.3104	0.693147	0.693147	0.693147	3.29005	3.43504	3.28587
Retrotransposon	LTR	Gypsy	Gypsy	PtRLG_167_PIER	3.40227	3.90225	4.24611	3.57646	3.26597	3.40646	5.23982	5.19663	5.27072	4.81816	4.39476	4.38529	3.18192	3.24383	3.24054	3.85249	3.89833	3.72139	4.94366	4.96259	4.92271	5.13436	5.19285	5.22297	0.693147	1.31219	1.29928	3.26928	3.19423	3.26876
Retrotransposon	LTR	Gypsy	Gypsy	PtRLG_169_PIER	2.23041	2.33264	2.46081	2.65725	2.83788	2.77259	6.07651	6.0699	6.10182	5.90813	5.70334	5.67557	3.42768	3.52269	3.54925	4.27658	4.18481	4.14967	5.62533	5.61494	5.58715	5.04844	5.06132	5.08798	0.693147	1.38629	0.693147	3.29302	3.29893	3.32725
Retrotransposon	LTR	Gypsy	Gypsy	PtRLG_17_B_PIER	4.26837	4.37366	4.19662	3.64741	3.74236	3.82339	4.44147	4.34205	4.43405	5.80148	5.56808	5.55898	3.51121	3.57992	3.51238	4.00142	4.10556	3.87821	3.54774	3.63078	3.62425	5.66594	5.69347	5.78017	0.693147	0.693147	0	3.31865	3.3671	3.32724
Retrotransposon	LTR	Gypsy	Gypsy	PtRLG_17_PIER	2.03331	1.63974	2.02228	2.98376	2.86379	2.66205	4.27118	4.33312	4.30584	5.1346	5.11458	5.09451	3.76411	3.77209	3.70304	3.77323	3.73064	3.63377	4.08584	4.03768	4.06811	4.3398	4.3645	4.34857	0.693147	1.38629	0.693147	2.79288	2.96421	2.96122
Retrotransposon	LTR	Gypsy	Gypsy	PtRLG_170_PIER	1.27418	1.1827	0.693147	1.48871	1.77666	2.0102	3.63637	3.64887	3.61551	5.42908	5.89468	5.86032	3.57493	3.52945	3.57247	4.26129	4.14339	4.20527	3.67445	3.64945	3.65068	4.7664	4.79643	4.78288	0.693147	0	0.693147	4.58868	4.58232	4.54433
Retrotransposon	LTR	Gypsy	Gypsy	PtRLG_171_PIER	1.3633	1.0116	1.32914	3.58166	3.98023	3.67533	4.49432	4.44035	4.46915	4.49566	4.50541	4.49897	2.98265	3.1301	3.04857	3.88815	3.99525	4.07942	4.03552	4.07508	4.02739	5.62255	5.62811	5.57768	0	0	0	2.65514	2.46399	2.5556
Retrotransposon	LTR	Gypsy	Gypsy	PtRLG_174_PIER	2.60417	2.35504	2.48491	2.95851	3.33915	3.00048	5.89467	5.74846	5.83043	5.47353	6.05365	5.94672	4.43424	4.33528	4.41044	4.78365	4.66941	4.68476	5.87086	5.81885	5.87403	5.43209	5.37388	5.51051	1.35239	1.11803	2.5539	3.80572	3.72753	3.83741
Retrotransposon	LTR	Gypsy	Gypsy	PtRLG_178_PIER	0.693147	0	0	2.40612	1.96009	2.17475	4.48799	4.45006	4.41786	3.91688	4.49856	4.51613	3.22376	3.207	3.23857	4.003	3.93641	4.01859	5.06572	5.0675	5.01485	4.25028	4.3065	4.27767	0	0	0.693147	4.03867	4.03039	4.07597
Retrotransposon	LTR	Gypsy	Gypsy	PtRLG_179_PIER	1.31219	1.06471	1.35963	1.30406	1.62268	1.06087	4.40332	4.44265	4.39138	5.84893	6.32863	6.28863	3.56388	3.7329	3.56028	6.08653	6.12301	6.15242	3.96954	4.05638	3.92282	6.00698	6.12699	6.03602	0.693147	0.693147	0	2.45766	2.5194	2.49758
Retrotransposon	LTR	Gypsy	Gypsy	PtRLG_18_C_PIER	0	0	0	0	0	0	5.02358	4.96489	4.96732	4.967	5.1669	5.14461	0.693147	1.06471	0.693147	2.13163	2.17853	1.38629	4.67467	4.70602	4.73567	1.67398	2.25129	1.68176	0	0	0	2.94444	3.11246	3.24165
Retrotransposon	LTR	Gypsy	Gypsy	PtRLG_18_D_PIER	2.63906	2.26868	2.07944	0	0.693147	0	5.8559	5.80458	5.87605	3.55814	3.58028	3.70212	1.09861	0.693147	0.693147	3.14091	3.41922	3.07885	5.47343	5.45944	5.43928	2.84385	3.18359	2.93119	0	0	0.693147	3.0879	3.19458	3.43756
Retrotransposon	LTR	Gypsy	Gypsy	PtRLG_18_E_PIER	0.693147	0	0	1.93747	1.30833	1.86587	5.15318	5.19671	5.18875	4.19554	4.18513	4.13407	3.44316	3.46894	3.59927	3.51732	3.72344	3.74872	4.62065	4.69085	4.62676	4.77516	4.60834	4.59181	0	0	0.693147	2.25746	2.20792	2.50471
Retrotransposon	LTR	Gypsy	Gypsy	PtRLG_18_F_PIER	0	0.693147	0.693147	0.693147	1.10758	0.693147	7.71653	7.72914	7.72666	4.35727	5.26786	5.14101	4.78888	5.20194	4.90095	2.05127	1.83258	1.7492	7.10677	7.10374	7.10316	2.00882	1.76929	2.51568	0.693147	0	0	1.96611	1.57351	1.29614
Retrotransposon	LTR	Gypsy	Gypsy	PtRLG_18_PIER	2.10788	2.06801	1.89204	3.50644	3.41019	3.39865	6.94928	6.93352	6.97138	5.85633	5.89757	5.92281	3.8597	3.86955	3.92888	4.46415	4.47077	4.42066	6.6466	6.63959	6.63657	6.20908	6.14785	6.21438	1.29098	1.0116	1.03609	3.1894	3.10532	3.09949
Retrotransposon	LTR	Gypsy	Gypsy	PtRLG_183_PIER	0	0	1.098612289	2.405773251	2.298874216	1.996554376	4.341062703	4.369540253	4.400625106	4.750464622	5.093535454	5.103840229	2.030467923	2.219646864	2.079441542	2.335374593	2.143052289	2.176335694	4.219667986	4.247403217	4.249586075	2.156846929	2.517438375	2.330755553	0	0	1.098612289	1.634130525	1.664246122	1.479076348
Retrotransposon	LTR	Gypsy	Gypsy	PtRLG_190_PIER	1.47727	1.52795	1.51329	2.58069	2.5941	2.53323	4.30142	4.33716	4.34212	5.22947	5.31413	5.31522	4.90407	4.84313	4.88661	5.39605	5.3567	5.42232	4.42756	4.35354	4.35662	5.96119	5.88676	5.89477	0.693147	0.693147	0.693147	5.03148	5.07303	4.99953
Retrotransposon	LTR	Gypsy	Gypsy	PtRLG_195_PIER	1.32176	1.6666	1.23676	3.53568	3.63339	3.45316	4.89278	4.91432	4.85447	5.99241	6.14328	6.13816	4.12734	4.1655	4.11524	5.11619	5.03103	5.09577	4.30284	4.31535	4.3261	6.18025	6.12475	6.14901	0	0	0	3.48998	3.5301	3.62493
Retrotransposon	LTR	Gypsy	Gypsy	PtRLG_2_B_PIER	2.72578	2.3149	2.4148	1.85503	1.91609	1.89372	4.83967	4.81524	4.82958	5.01172	5.52755	5.5275	4.23429	4.2446	4.27772	4.81335	4.75979	4.75493	5.39436	5.41836	5.47426	5.0707	5.08163	5.08114	3.08453	2.18792	2.33075	4.50977	4.49924	4.49888
Retrotransposon	LTR	Gypsy	Gypsy	PtRLG_2_C_PIER	2.19481	2.2673	2.26868	1.92317	1.75375	1.9311	6.6544	6.65614	6.65346	5.763	6.38394	6.35968	4.43819	4.40675	4.45339	5.26813	5.19357	5.18592	6.99457	7.01135	6.96577	5.38304	5.39967	5.3754	1.44345	0.693147	0.870829	4.83669	4.82542	4.81408
Retrotransposon	LTR	Gypsy	Gypsy	PtRLG_2_PIER	2.93255	2.64806	2.91456	2.16521	2.17629	2.15661	7.03611	7.0213	7.01868	5.70422	6.2126	6.23192	4.65505	4.67828	4.60828	5.21764	5.1711	5.17005	6.83649	6.78009	6.826	5.67318	5.68563	5.66621	1.12847	0.888455	1.36431	4.9869	4.92494	4.99984
Retrotransposon	LTR	Gypsy	Gypsy	PtRLG_203_PIER	1.66255	1.71765	1.88031	0.693147	0.996831	0.693147	6.41618	6.41888	6.3934	3.97174	4.2441	4.29078	3.95587	4.13377	3.88883	2.55433	2.88507	2.61458	5.90387	5.91871	5.94126	3.27033	2.93587	3.22575	0	0	0	2.60364	2.50261	2.66108
Retrotransposon	LTR	Gypsy	Gypsy	PtRLG_204_PIER	1.26567	1.91082	1.59686	2.31628	2.20306	2.2049	4.41907	4.39272	4.33892	5.54051	5.98253	5.95045	4.24579	4.24208	4.28709	5.17671	5.10046	5.13452	4.33014	4.36179	4.31995	5.47681	5.50691	5.49181	1.38629	1.38629	1.09861	4.58324	4.54373	4.56161
Retrotransposon	LTR	Gypsy	Gypsy	PtRLG_208_PIER	1.7492	1.51413	2.00148	5.65555	5.007	5.65681	4.36715	4.34335	4.44445	3.85963	3.4907	3.52183	1.32176	1.44561	1.92632	1.71008	1.66771	1.58639	3.84544	3.85764	3.74032	2.51881	2.32239	2.34899	0	0	0	2.32201	2.40695	2.25685
Retrotransposon	LTR	Gypsy	Gypsy	PtRLG_21_B_PIER	4.33895	4.39481	4.1144	4.82682	5.04213	4.728	6.89453	6.8885	6.90322	6.43963	6.44498	6.48741	4.78932	4.83675	4.80886	5.69743	5.71583	5.6753	6.49282	6.4734	6.48145	6.49265	6.5202	6.41872	1.55814	2.30259	1.71008	5.02314	4.95241	4.88358
Retrotransposon	LTR	Gypsy	Gypsy	PtRLG_21_PIER	2.91235	3.38673	2.92376	4.66936	4.45989	4.28533	7.20718	7.19914	7.22243	5.76901	5.87851	5.84186	4.52999	4.57344	4.59369	6.06287	6.05369	6.1307	6.5992	6.59876	6.57384	5.55579	5.7036	5.57174	0.693147	0.693147	0.693147	4.78914	4.76286	4.71371
Retrotransposon	LTR	Gypsy	Gypsy	PtRLG_213_PIER	1.75175	1.76578	2.87639	1.27575	1.08091	1.37582	7.05134	7.09585	7.06573	4.02934	4.32384	4.27458	3.39498	3.26583	3.34865	3.74412	3.593	3.73023	6.49108	6.49158	6.52927	3.95993	3.85089	3.73846	1.09861	0.693147	0.693147	2.46385	2.31871	2.37205
Retrotransposon	LTR	Gypsy	Gypsy	PtRLG_214_PIER	0.693147	1.12214	1.10931	0.990983	1.45001	1.56454	4.35029	4.32555	4.36799	5.3125	5.79449	5.7954	4.15643	4.24498	4.33228	4.39274	4.40011	4.37637	4.46387	4.43099	4.44977	4.93989	4.88915	4.89411	0	1.14513	1.79176	3.32263	3.28493	3.29697
Retrotransposon	LTR	Gypsy	Gypsy	PtRLG_215_PIER	1.41075	1.48409	1.06784	2.6526	2.53239	2.75774	7.27291	7.29271	7.31998	6.17274	6.09443	6.05022	4.30146	4.33103	4.31877	5.53313	5.4747	5.47306	7.03736	6.99198	7.04394	5.53809	5.46085	5.53272	0.936093	1.27297	1.20831	4.131	4.03276	4.07295
Retrotransposon	LTR	Gypsy	Gypsy	PtRLG_216_PIER	6.26313	6.30052	6.29632	5.76415	4.77588	4.96284	4.00856	4.00473	3.99345	2.99448	3.329	3.03577	2.64553	2.72362	2.51476	2.5448	2.63428	2.63375	3.48756	3.38056	3.43682	2.89037	2.45101	3.26289	4.00125	3.62878	3.3322	3.19902	3.21733	2.86365
Retrotransposon	LTR	Gypsy	Gypsy	PtRLG_222_PIER	1.2934	1.49327	1.6645	2.83238	2.95459	2.6035	4.28853	4.3148	4.32012	5.48559	5.29787	5.31947	2.71941	2.58042	2.76434	3.02908	3.23579	3.10351	3.9214	3.93869	3.89812	4.72671	4.69899	4.67726	0	0.693147	0	2.67735	2.73622	2.77108
Retrotransposon	LTR	Gypsy	Gypsy	PtRLG_225_PIER	2.98816	3.26261	3.01494	3.23353	3.3847	3.45573	6.56969	6.58561	6.59859	6.52003	6.49958	6.51808	4.3964	4.40058	4.38886	6.10607	5.99973	6.04676	6.41646	6.44774	6.45598	6.66277	6.64358	6.65216	1.06784	1.12847	0.693147	4.32059	4.20622	4.34069
Retrotransposon	LTR	Gypsy	Gypsy	PtRLG_228_PIER	1.77307	1.59886	1.16315	3.84742	4.03044	3.98155	4.43061	4.42563	4.39456	6.14071	5.9613	5.91937	5.16004	5.08779	5.13397	5.53153	5.34065	5.28813	4.19854	4.01908	4.16235	5.85483	5.88509	5.9114	0	0	0	5.37099	5.57656	5.48236
Retrotransposon	LTR	Gypsy	Gypsy	PtRLG_229_PIER	1.58697	2.19722	1.98591	1.15268	0.693147	1.3676	4.05363	4.05308	4.09409	5.33843	4.93114	4.7982	2.25299	2.31799	2.23948	4.06998	3.81807	3.78314	3.50043	3.51833	3.53981	4.59512	4.5906	4.71569	0	0	0	2.93535	2.80625	2.94444
Retrotransposon	LTR	Gypsy	Gypsy	PtRLG_230_PIER	1.7492	1.47727	1.34373	3.65599	3.96618	3.58543	4.39095	4.38646	4.33246	5.3264	5.41515	5.41151	4.05687	3.75663	4.01255	4.85482	4.85554	4.94825	3.88395	3.88374	3.95879	5.51685	5.71973	5.71735	0.693147	0	0	3.86193	3.85953	3.79766
Retrotransposon	LTR	Gypsy	Gypsy	PtRLG_238_PIER	2.77259	3.04633	2.97122	3.61833	3.52822	3.55057	5.12939	5.14328	5.15517	6.24234	6.46543	6.43972	3.63405	3.63203	3.70155	5.22067	5.12668	5.18776	4.76839	4.75466	4.71156	5.92146	5.91001	5.93076	0	0	0.693147	3.82301	3.7441	3.74367
Retrotransposon	LTR	Gypsy	Gypsy	PtRLG_239_PIER	3.23441	3.20403	3.47035	3.04376	2.882	2.86827	4.44433	4.40172	4.50338	5.44732	5.41371	5.37348	3.50803	3.34795	3.46356	3.21265	3.34433	3.28735	4.11906	4.14302	4.13698	4.80045	4.8408	4.90473	0.693147	0	0.693147	3.25151	3.28761	3.23144
Retrotransposon	LTR	Gypsy	Gypsy	PtRLG_240_PIER	3.91927	4.17439	3.87536	2.23953	2.64414	2.38617	3.64042	3.67831	3.68184	5.58621	5.74205	5.68177	3.73004	3.67813	3.72239	3.9892	3.98554	3.97799	3.34689	3.34732	3.35991	5.07199	5.17017	5.06364	0	0	0	3.47266	3.59406	3.55197
Retrotransposon	LTR	Gypsy	Gypsy	PtRLG_248_PIER	2.76441	3.01511	2.84491	3.60614	3.42892	3.49016	5.88744	5.89783	5.96432	5.67867	5.13935	5.20376	3.14151	3.13283	3.03337	4.07418	3.98771	4.10597	5.38507	5.28482	5.29002	4.59904	4.63504	4.63556	0.693147	0	0.693147	3.52164	3.62021	3.36643
Retrotransposon	LTR	Gypsy	Gypsy	PtRLG_25_PIER	1.24909	1.42139	1.32567	2.24295	2.48994	2.60269	3.95973	3.93849	3.95537	5.08786	5.40712	5.49113	2.57389	2.41044	2.83797	2.2692	2.40168	2.30478	3.91189	3.94526	3.90111	2.49375	2.45494	2.49275	0	0	0	3.01576	3.10031	2.97172
Retrotransposon	LTR	Gypsy	Gypsy	PtRLG_250_PIER	2.06142	1.98023	2.03582	2.60081	2.95289	2.44395	4.35605	4.37998	4.38887	5.05748	5.01088	4.96753	3.47109	3.35357	3.24514	4.03261	3.93787	4.03432	3.93136	3.91357	3.96024	4.85402	4.86958	4.8215	0	0	0	2.71476	2.55507	2.51266
Retrotransposon	LTR	Gypsy	Gypsy	PtRLG_256_PIER	0	0	0	1.56398	0.693147	0.693147	6.06289	6.13683	6.11997	4.60572	5.05153	5.13848	5.85946	6.05214	5.98543	3.87239	3.94763	3.82351	5.3804	5.40942	5.40479	3.49234	3.62434	3.65754	0	0	0	2.63239	2.52208	2.3979
Retrotransposon	LTR	Gypsy	Gypsy	PtRLG_260_PIER	0.826677	1.46634	1.40983	1.6874	1.71298	1.4142	4.11872	4.07289	4.0881	5.15401	5.53527	5.52018	4.05917	4.00647	4.02836	5.13577	5.02876	5.06239	4.22731	4.21979	4.171	5.55657	5.55905	5.58394	0.693147	0	0	4.66675	4.67614	4.77769
Retrotransposon	LTR	Gypsy	Gypsy	PtRLG_263_PIER	3.15983	2.98835	2.77591	3.60171	3.88195	3.73502	4.87418	4.84433	4.96775	5.53338	5.46146	5.46171	3.38872	3.29268	3.26976	4.24397	4.26624	4.25456	4.5318	4.59047	4.50102	5.36659	5.3937	5.39217	0.693147	0	0	3.27266	3.39924	3.49413
Retrotransposon	LTR	Gypsy	Gypsy	PtRLG_272_PIER	1.609437912	2.054123734	2.09714147	1.312187543	1.326870737	1.609437912	4.919535571	4.944388648	4.922692574	4.078142346	4.483099722	4.503633461	1.473812901	1.618916845	1.430746558	3.530774299	3.738300372	3.716866634	5.775665831	5.72555049	5.75786338	3.918547673	3.949264839	3.964163741	1.098612289	1.609437912	1.098612289	1.34474554	1.526056303	1.419521185
Retrotransposon	LTR	Gypsy	Gypsy	PtRLG_276_PIER	4.25419	4.39599	3.62434	4.40709	4.27331	4.4809	8.02661	8.09762	8.05718	6.80786	6.95795	6.87693	4.63905	4.6115	4.67101	6.60812	6.61095	6.53385	7.45927	7.4991	7.50418	7.35846	7.33877	7.40268	0.693147	0.693147	1.2104	4.50598	4.5052	4.64598
Retrotransposon	LTR	Gypsy	Gypsy	PtRLG_279_PIER	3.68888	3.92895	3.80603	4.64059	4.77652	4.55573	7.10563	7.07951	7.1405	6.07006	6.07935	6.06618	5.22688	5.22873	5.23975	5.49071	5.4172	5.43165	6.72865	6.74095	6.72542	6.04971	6.04033	6.10282	0.693147	0.693147	0.693147	4.36283	4.38897	4.35945
Retrotransposon	LTR	Gypsy	Gypsy	PtRLG_28_PIER	1.68542	1.55025	1.63315	3.32094	3.37122	3.10227	4.64102	4.68194	4.65356	6.06689	5.91292	5.90142	5.30928	5.36883	5.33369	4.26675	4.28861	4.31111	4.34956	4.38801	4.2982	5.19197	5.1956	5.25076	0.693147	0.693147	0.693147	3.44624	3.44283	3.32364
Retrotransposon	LTR	Gypsy	Gypsy	PtRLG_283_PIER	2.93916	2.39987	2.6608	3.89291	3.97963	3.91422	7.09083	7.08114	7.07367	5.52689	5.48406	5.44524	3.31329	3.27657	3.20257	5.34762	5.25877	5.25885	6.77647	6.78329	6.75169	5.59897	5.56694	5.53317	1.11436	0.693147	0.910872	4.44572	4.3218	4.37267
Retrotransposon	LTR	Gypsy	Gypsy	PtRLG_284_PIER	1.77649	1.71329	1.83361	3.78776	3.47027	3.55456	4.11066	4.09546	4.1214	5.56711	5.04041	5.053	3.10739	3.27482	3.02637	3.35361	3.0894	3.27617	3.67584	3.70717	3.61733	3.51188	3.61541	3.62729	0.693147	1.34707	0	3.38877	3.46253	3.51803
Retrotransposon	LTR	Gypsy	Gypsy	PtRLG_286_PIER	1.7346	2.60269	1.95684	2.30259	1.52795	1.24111	4.44734	4.36395	4.46715	5.23636	5.60193	5.55746	3.45687	3.35675	3.4694	5.59377	5.48225	5.46258	4.06031	4.10264	3.98857	5.48127	5.53904	5.37369	0	0	0.693147	2.42775	2.73154	2.48353
Retrotransposon	LTR	Gypsy	Gypsy	PtRLG_289_PIER	3.68234	3.91393	3.83498	4.4786	4.59448	4.66537	4.28821	4.27247	4.26724	5.91091	6.01774	6.06519	4.14532	4.00892	4.18211	4.25578	4.21359	4.06407	4.29292	4.37344	4.3321	4.96294	4.9354	4.96409	1.68176	2.17475	2.65926	4.31001	4.37393	4.32955
Retrotransposon	LTR	Gypsy	Gypsy	PtRLG_3_B_PIER	1.90251	1.76707	1.62552	2.57515	2.65373	2.22897	4.34858	4.36809	4.38119	5.05973	5.42734	5.37248	3.05813	3.00503	3.00249	4.3039	4.28115	4.26806	4.47664	4.49452	4.48364	4.74063	4.74171	4.7438	1.38629	0.693147	0	3.25155	3.14645	3.086
Retrotransposon	LTR	Gypsy	Gypsy	PtRLG_3_C_PIER	1.6704	1.37269	1.70475	1.89334	1.38629	1.95238	3.86266	3.86811	3.84167	5.27621	5.72747	5.72732	3.77534	3.74907	3.80986	4.78069	4.69089	4.76974	3.88393	3.97978	3.91046	5.51808	5.51343	5.49621	3.696	3.84099	2.74084	4.10075	4.19809	4.14482
Retrotransposon	LTR	Gypsy	Gypsy	PtRLG_3_PIER	2.80699	2.94599	2.88229	2.48835	2.43233	2.46183	5.71549	5.69945	5.72851	5.77851	6.48653	6.48839	3.95485	3.88858	3.93449	5.1543	5.0807	5.117	6.14878	6.13595	6.14869	5.29276	5.26334	5.29144	1.97408	2.07047	1.80152	3.69362	3.64393	3.63274
Retrotransposon	LTR	Gypsy	Gypsy	PtRLG_301_PIER	2.32315	2.27036	1.92529	3.04516	3.30599	3.28818	4.08933	4.1018	4.12225	5.26326	4.99121	5.00029	3.55892	3.60322	3.46489	4.68213	4.63473	4.65621	3.65426	3.68405	3.65424	5.90635	5.83715	5.86574	0.693147	0	0.693147	2.89794	3.00188	2.91472
Retrotransposon	LTR	Gypsy	Gypsy	PtRLG_305_PIER	3.07827	3.19032	3.08143	4.06217	4.25179	4.22036	6.21828	6.23872	6.22577	5.14667	5.07761	5.20069	4.08539	4.08861	4.09338	5.07721	5.04426	5.14655	5.96785	6.04843	5.99379	5.39413	5.42093	5.36751	0.693147	0.693147	0	3.62193	3.72911	3.61848
Retrotransposon	LTR	Gypsy	Gypsy	PtRLG_308_PIER	2.69947	2.67988	2.83321	3.03082	3.05724	3.07332	4.55783	4.52777	4.5704	5.91176	5.84832	5.86609	3.89004	3.95796	3.95966	6.08695	6.08216	5.98813	4.06824	4.01359	4.09654	6.83424	6.82244	6.88488	0	0	0	4.31404	4.27802	4.30275
Retrotransposon	LTR	Gypsy	Gypsy	PtRLG_309_PIER	4.20469	3.65842	3.59883	2.70575	2.8094	2.4311	4.53984	4.50044	4.59102	4.32728	4.76703	4.74406	2.70878	2.52328	3.01026	5.85793	5.77538	5.7498	4.26587	4.30233	4.28981	6.34491	6.46592	6.26544	0	0.693147	0	3.02878	3.00703	2.96099
Retrotransposon	LTR	Gypsy	Gypsy	PtRLG_310_PIER	2.63906	1.95881	1.71172	2.57237	2.84297	2.48491	4.95703	4.87825	4.98146	5.94278	6.16927	6.15824	3.27968	3.25043	3.15181	3.72735	3.78045	3.71446	4.6507	4.61426	4.64737	3.95872	3.92263	4.00301	0	0	0	3.15673	3.08174	3.14777
Retrotransposon	LTR	Gypsy	Gypsy	PtRLG_311_PIER	3.29053	2.68558	3.06027	2.04769	1.60944	1.92991	5.03449	5.05348	4.9635	5.67151	6.2462	6.21535	1.81095	1.98281	2.11852	3.81101	4.02361	3.92484	4.59489	4.45976	4.50463	5.33391	5.20047	5.26564	0	0.693147	0	2.141	2.3645	2.27256
Retrotransposon	LTR	Gypsy	Gypsy	PtRLG_318_PIER	1.29928	0.693147	0.693147	1.95684	1.64866	1.38629	4.28409	4.25845	4.30349	4.86299	4.41941	4.35017	3.16588	3.20803	3.27787	4.44596	4.32672	4.48214	3.95313	4.11722	4.06323	5.71373	5.97474	5.51495	0	0.693147	0	3.17189	2.89788	3.01812
Retrotransposon	LTR	Gypsy	Gypsy	PtRLG_320_PIER	2.61783	2.2162	2.73337	2.23663	2.21006	1.84343	5.52897	5.55171	5.57974	7.37423	7.48398	7.48651	4.30494	4.31511	4.24119	6.77093	6.69167	6.7586	5.28945	5.29157	5.30396	7.36662	7.42635	7.41015	0	0	0	4.25718	4.23893	4.21178
Retrotransposon	LTR	Gypsy	Gypsy	PtRLG_326_PIER	2.10542	2.66517	1.98311	2.26952	2.77069	2.80448	5.20093	5.18258	5.1767	4.34466	4.32298	4.32313	3.2945	3.35138	3.2518	4.6773	4.72917	4.63942	5.0214	5.0011	5.00393	5.74768	5.97054	5.85657	0	0.693147	0.693147	3.25727	3.2869	3.28144
Retrotransposon	LTR	Gypsy	Gypsy	PtRLG_327_PIER	2.62949	2.22254	1.96611	2.03377	1.9406	1.75486	3.99762	3.96336	4.05514	5.0179	5.07402	5.13603	3.2982	3.09104	3.17374	4.27208	4.36165	4.37019	3.56159	3.71068	3.5906	5.5846	5.63911	5.55	0	0	0	3.04172	2.92747	2.90131
Retrotransposon	LTR	Gypsy	Gypsy	PtRLG_328_PIER	3.13699	3.04818	2.76032	3.34519	3.24843	3.27083	3.23466	3.18286	3.12295	5.29811	5.13553	5.06751	3.4195	3.565	3.49903	2.67559	2.71995	2.82601	2.5339	2.64644	2.63249	4.75011	4.70847	4.79742	0.693147	0	0	2.61648	2.7466	2.59302
Retrotransposon	LTR	Gypsy	Gypsy	PtRLG_333_PIER	1.72451	1.69917	1.77406	1.7336	1.61991	1.54045	4.20563	4.20159	4.20005	5.23495	5.42466	5.41182	3.41773	3.51472	3.54551	4.74998	4.73179	4.81743	4.66118	4.63548	4.66393	5.19033	5.18673	5.19505	0.693147	0.693147	0	4.58618	4.45974	4.63196
Retrotransposon	LTR	Gypsy	Gypsy	PtRLG_339_PIER	2.08656	1.78171	1.7543	3.16496	2.99613	3.14332	4.6047	4.6153	4.62115	6.28454	6.48086	6.46649	4.74628	4.75796	4.72927	5.61794	5.64211	5.60297	4.15935	4.22926	4.13333	6.56862	6.51941	6.52906	0	1.06784	0.693147	4.23974	4.27755	4.22157
Retrotransposon	LTR	Gypsy	Gypsy	PtRLG_351_PIER	2.79302	2.93898	2.94538	3.37978	3.42709	3.36472	4.62068	4.5985	4.61154	5.40987	5.41035	5.41407	3.55368	3.67634	3.5378	5.04096	5.07582	5.04169	4.33673	4.32441	4.27889	5.62556	5.58172	5.63955	1.09861	0.980831	2.07944	3.67082	3.63528	3.5853
Retrotransposon	LTR	Gypsy	Gypsy	PtRLG_355_PIER	0.693147	0.938271	1.42404	1.55619	2.11153	2.0003	3.7034	3.674	3.76302	4.71903	4.85584	4.85147	2.81444	2.83692	2.78852	5.04557	5.32157	5.00305	3.26189	3.23153	3.32557	5.29292	5.38067	5.26278	0	0	0	2.8513	2.95243	2.76321
Retrotransposon	LTR	Gypsy	Gypsy	PtRLG_356_PIER	0	0	0	0.693147	0.693147	1.38629	5.55826	5.53979	5.54848	6.23674	6.72044	6.69415	3.36483	3.18259	3.41394	4.32192	4.33563	4.25942	5.12689	5.18178	5.13043	5.86735	6.12097	5.77465	0	0	0	3.00654	3.05825	3.02744
Retrotransposon	LTR	Gypsy	Gypsy	PtRLG_358_PIER	3.09946	2.72796	2.88772	4.44852	4.37267	4.39241	6.00257	5.95754	5.94941	6.22231	6.20034	6.16535	3.60029	3.61255	3.53356	4.91711	4.81496	4.89848	5.64562	5.69729	5.68427	6.0424	6.03057	6.10498	1.38629	1.38629	1.69168	3.7246	3.84787	3.7106
Retrotransposon	LTR	Gypsy	Gypsy	PtRLG_359_PIER	0	1.92529	0	0.916291	1.24319	1.33977	5.95564	5.90864	5.86233	5.75369	5.58647	5.57907	2.122	1.56862	1.57435	2.98781	2.83065	3.31419	5.53795	5.48906	5.50225	2.81145	2.64539	2.79535	0	0	0.693147	3.20753	2.87057	3.21416
Retrotransposon	LTR	Gypsy	Gypsy	PtRLG_366_PIER	2.62467	2.43242	2.64307	3.89953	3.8849	3.81443	4.56567	4.5251	4.61058	6.60085	6.6433	6.64918	3.70874	3.70995	3.75172	5.37737	5.31911	5.33063	4.28453	4.3198	4.25437	5.67115	5.68098	5.67169	0	0.693147	1.38629	3.85231	3.88859	3.89723
Retrotransposon	LTR	Gypsy	Gypsy	PtRLG_375_PIER	1.31219	1.22723	0.693147	2.15948	2.60269	1.38629	5.0385	5.06828	5.07878	5.32973	6.59419	6.29712	3.71816	3.7013	3.96714	4.05034	3.59011	3.45827	4.79572	4.7557	4.84581	3.45092	3.615	3.55589	0	0	0	2.26267	2.149	1.96869
Retrotransposon	LTR	Gypsy	Gypsy	PtRLG_376_PIER	2.11099	2.29632	2.164	1.43922	1.27066	1.70365	6.3565	6.37503	6.32951	6.1074	6.56789	6.56656	4.62824	4.55829	4.54754	5.78203	5.74247	5.74229	7.20333	7.1528	7.20613	6.27988	6.27693	6.28506	0	0.693147	0.693147	4.86467	4.88619	4.84101
Retrotransposon	LTR	Gypsy	Gypsy	PtRLG_4_PIER	3.45939	3.37819	3.30162	2.16673	2.47771	2.16332	5.69956	5.71265	5.69532	3.8695	3.92599	3.84599	3.98091	3.8278	3.98927	2.84727	2.74705	2.84368	5.50445	5.49316	5.49766	3.43146	3.40238	3.51364	3.47275	3.56447	3.53911	2.7098	2.56936	2.71462
Retrotransposon	LTR	Gypsy	Gypsy	PtRLG_401_PIER	2.69254	2.87243	2.40994	3.23212	3.49171	3.49375	5.22069	5.29912	5.28531	5.58033	5.82524	5.76647	3.95473	3.93207	3.94137	4.21727	4.20307	4.3061	4.80995	4.77163	4.81409	4.90874	4.91265	4.95927	0.693147	0	0	3.6923	3.50878	3.62531
Retrotransposon	LTR	Gypsy	Gypsy	PtRLG_404_PIER	1.06784	1.38629	0.693147	1.72924	1.43176	1.6233	4.14751	4.12807	4.11668	5.14374	5.19702	5.23446	3.03546	3.08443	3.03596	4.28115	4.41353	4.21718	3.91336	3.86426	3.95443	4.64648	4.66029	4.63359	0	0	0	3.24381	3.24649	3.2922
Retrotransposon	LTR	Gypsy	Gypsy	PtRLG_405_PIER	4.25863	4.45786	4.59348	4.61553	4.64608	4.56921	5.55039	5.5386	5.46675	5.04514	4.89252	4.94426	4.11514	4.18109	4.05752	4.22549	4.24286	4.28127	5.21286	5.27891	5.26454	5.31007	5.32138	5.3169	2.11153	2.47506	2.96675	4.64348	4.67168	4.62543
Retrotransposon	LTR	Gypsy	Gypsy	PtRLG_407_PIER	0.969399	1.28093	1.14513	3.08562	3.10331	2.98184	5.33493	5.3576	5.3702	5.27957	5.55124	5.52637	5.04476	4.97989	5.05308	5.4254	5.42783	5.37719	5.10204	5.10448	5.12209	6.11389	6.10885	6.07581	1.38629	0.693147	0.693147	4.5576	4.51608	4.37546
Retrotransposon	LTR	Gypsy	Gypsy	PtRLG_415_PIER	3.77849	3.34011	3.35574	1.01857	1.04982	0.904457	4.86733	4.90046	4.9577	4.37487	4.53953	4.48493	2.66289	2.62818	2.50433	5.18052	5.15767	5.37586	4.56774	4.53501	4.52962	6.1135	6.09443	6.11606	0.693147	0	0.693147	2.17767	2.2432	2.4831
Retrotransposon	LTR	Gypsy	Gypsy	PtRLG_418_B_PIER	2.83561	2.63775	2.60411	2.77585	2.64873	2.66166	6.97745	6.9891	7.01126	6.34624	6.36767	6.34621	6.75127	6.78226	6.78124	6.26492	6.18685	6.19852	6.63433	6.65693	6.64152	6.61638	6.62898	6.65334	0.843428	0.693147	0.948041	4.59427	4.5738	4.56295
Retrotransposon	LTR	Gypsy	Gypsy	PtRLG_418_PIER	3.50736	3.68382	3.47523	2.96699	3.19556	3.19568	6.29043	6.25153	6.27566	5.38174	5.36572	5.38175	6.46203	6.42436	6.46421	5.2916	5.25512	5.2321	6.33814	6.35282	6.36616	6.10089	6.043	6.09912	1.20397	1.57735	1.22973	4.07225	4.11259	4.08698
Retrotransposon	LTR	Gypsy	Gypsy	PtRLG_419_B_PIER	3.34767	3.26986	3.25838	5.30443	5.32052	5.34695	4.01397	3.96554	3.98122	2.16788	2.54758	2.57812	3.7395	3.67497	3.80438	3.26587	3.5352	3.46037	3.31092	3.31223	3.22714	4.43532	4.29355	4.32237	4.11321	3.45947	4.32697	3.06984	3.44021	3.30879
Retrotransposon	LTR	Gypsy	Gypsy	PtRLG_419_PIER	4.21191	4.20515	4.18308	4.76594	5.13748	5.10965	5.02016	5.05796	5.04442	3.72663	4.10188	4.02719	2.97119	3.07456	2.97379	2.95929	2.65958	2.82138	4.86472	4.87205	4.78642	3.4761	3.26341	3.48617	1.46634	0.916291	1.70475	3.74973	3.8219	3.7548
Retrotransposon	LTR	Gypsy	Gypsy	PtRLG_423_B_PIER	1.94321	2.43426	1.8444	4.34099	4.35448	4.19515	2.46544	2.53738	2.44382	4.01442	3.96874	3.99333	3.3627	3.25414	3.16794	3.89995	3.94958	4.00918	5.22054	5.19493	5.22058	4.11068	4.12952	4.16558	2.94444	2.35707	2.32146	3.85904	3.7996	3.76524
Retrotransposon	LTR	Gypsy	Gypsy	PtRLG_424_PIER	1.90193	2.15543	2.11181	4.20124	4.1357	3.31782	3.72909	3.71646	3.67443	3.78234	4.10644	4.0725	5.52534	5.51582	5.4658	3.65602	3.62997	3.77376	3.55139	3.60187	3.59389	4.58092	4.32038	4.47203	0.693147	0	0.693147	4.77496	4.72723	4.80268
Retrotransposon	LTR	Gypsy	Gypsy	PtRLG_426_PIER	4.25628	4.39402	4.24428	2.13726	2.37857	2.20792	4.43506	4.41924	4.42468	4.10443	4.28018	4.24349	5.02301	4.97433	4.94956	3.91871	4.09032	3.98374	4.23881	4.20721	4.28095	4.6749	4.54702	4.64524	2.33767	2.03862	2.08774	4.14177	4.26766	4.12713
Retrotransposon	LTR	Gypsy	Gypsy	PtRLG_430_PIER	3.26872	3.3656	3.46574	2.30813	2.53466	2.35243	4.03395	4.04941	4.03712	3.89291	3.89168	3.87699	3.3312	3.27753	3.34887	4.64555	4.50805	4.50883	3.82527	3.76481	3.74149	4.9852	5.01271	4.90012	0.693147	0.693147	0.693147	3.45937	3.31085	3.41063
Retrotransposon	LTR	Gypsy	Gypsy	PtRLG_431_PIER	3.51588	3.37656	3.25443	3.64293	3.51435	3.53015	4.88569	4.92737	4.93725	5.23719	5.18344	5.16384	3.44071	3.38726	3.44626	4.32046	4.38313	4.36363	4.74597	4.73898	4.73355	4.43415	4.41344	4.45365	3.79997	2.97762	3.68888	4.00232	3.94225	4.03799
Retrotransposon	LTR	Gypsy	Gypsy	PtRLG_432_B_PIER	3.541538866	3.546163152	3.688879454	3.311586265	3.32773023	2.833213344	3.590580061	3.558537256	3.563089448	2.609356303	2.782489547	2.875562642	1.435084525	1.572396263	1.386294361	2.690463118	2.869545273	2.527143643	4.043614267	4.000632605	3.997666614	2.739439043	2.587951987	2.583997552	5.087596335	4.916324615	3.601334298	2.501435952	1.945910149	2.220964975
Retrotransposon	LTR	Gypsy	Gypsy	PtRLG_432_E_PIER	1.99655	2.14175	1.96611	1.15803	1.79176	1.20936	5.42927	5.39162	5.4075	4.56573	4.95282	4.9403	4.89839	4.88309	4.87751	2.36127	2.40859	2.2767	5.77018	5.71557	5.71473	3.07791	3.06175	3.11841	0.693147	0	0.693147	2.7367	2.62136	2.67262
Retrotransposon	LTR	Gypsy	Gypsy	PtRLG_432_PIER	3.04818	3.23212	2.72348	0.889856	0.693147	1.09205	5.78007	5.72445	5.78666	5.12762	5.51112	5.50291	4.19047	4.23022	4.29351	3.29076	3.15304	2.92535	6.0898	6.05839	6.09881	3.51948	3.60977	3.46819	0	0.916291	0.693147	3.80419	3.75515	3.88416
Retrotransposon	LTR	Gypsy	Gypsy	PtRLG_434_PIER	4.14158	4.17838	3.9566	2.31901	2.29552	2.3613	3.46482	3.27496	3.29643	4.74974	5.12539	5.08959	2.5928	2.79989	2.635	2.52247	2.56933	2.42037	3.80849	3.88609	3.74982	2.80794	2.9426	2.8622	1.26369	1.50991	1.38629	3.33366	3.30744	3.60866
Retrotransposon	LTR	Gypsy	Gypsy	PtRLG_438_B_PIER	1.791759469	1.349925976	1.504077397	1.236761337	1.098612289	1.098612289	3.521084868	3.513209725	3.550731708	2.246314168	2.384822928	2.393556784	3.442019376	3.725693427	3.314186005	1.871802177	1.265665091	1.098612289	5.250245195	5.11600381	5.179336739	1.098612289	0	1.791759469	1.098612289	1.098612289	1.791759469	2.371578364	2.516453765	1.904238091
Retrotransposon	LTR	Gypsy	Gypsy	PtRLG_438_C_PIER	0.693147	0	0	1.30291	0.693147	0.693147	5.65381	5.63122	5.64047	3.79121	3.91261	3.79798	0	0.693147	0.693147	0	0	0	4.74535	4.71113	4.74668	0.693147	0.693147	1.38629	0.693147	0.693147	0	2.57085	2.02002	2.34455
Retrotransposon	LTR	Gypsy	Gypsy	PtRLG_438_PIER	2.61007	2.57714	2.70306	2.68249	2.7446	2.95848	5.60311	5.60543	5.59975	4.16252	4.2639	4.28653	4.02438	4.116	4.04012	3.719	3.6219	3.60854	4.65781	4.64457	4.67929	3.86652	3.94146	3.87473	1.28785	0.955511	0.893816	3.6459	3.80271	3.66742
Retrotransposon	LTR	Gypsy	Gypsy	PtRLG_439_B_PIER	2.04867	1.48503	1.32338	1.64471	1.72924	1.37699	5.55705	5.5719	5.57623	3.6092	3.89617	3.9404	3.08645	3.14196	3.27733	2.83449	2.72798	2.84027	5.64457	5.63501	5.66092	2.6155	2.60269	2.68536	1.07264	1.42501	2.18864	1.61951	1.77142	1.59224
Retrotransposon	LTR	Gypsy	Gypsy	PtRLG_439_PIER	2.86326	2.92988	3.07051	2.81341	2.65605	2.61173	6.0394	6.02567	6.08386	4.70691	4.64678	4.66269	4.31044	4.358	4.33292	3.47029	3.35553	3.45499	5.85511	5.86203	5.83995	3.89729	3.96419	3.7936	1.05416	0.693147	0.980831	2.6641	2.55829	2.56624
Retrotransposon	LTR	Gypsy	Gypsy	PtRLG_440_B_PIER	5.34152	5.28274	5.37607	2.77488	2.8259	2.75886	5.04025	5.04012	5.0573	4.05263	4.14016	4.06744	3.27476	3.35385	3.26602	4.38418	4.37683	4.37783	5.0363	5.03428	5.02844	4.47864	4.57294	4.53695	2.0149	2.11453	2.04554	5.06557	5.06873	5.2275
Retrotransposon	LTR	Gypsy	Gypsy	PtRLG_440_C_PIER	5.3627	5.28301	5.26747	2.38591	2.47201	2.52055	5.06735	5.10208	5.08455	5.12325	4.97782	4.8832	3.57536	3.57038	3.6256	5.13055	5.06441	5.19546	5.06619	5.00258	5.00639	5.54531	5.4329	5.54138	2.91777	3.44316	3.16608	4.89768	4.77052	4.93682
Retrotransposon	LTR	Gypsy	Gypsy	PtRLG_440_PIER	5.75718	5.72059	5.70086	2.72447	2.5217	2.80768	5.62554	5.62185	5.63716	5.37998	5.28091	5.24946	3.459	3.40158	3.46928	5.37187	5.31098	5.33484	5.52744	5.49048	5.51553	5.61563	5.62348	5.67227	3.2518	3.58352	3.47816	4.48162	4.48575	4.48443
Retrotransposon	LTR	Gypsy	Gypsy	PtRLG_441_PIER	3.3716	3.42401	3.8111	1.08091	1.47591	1.29928	5.74627	5.69314	5.73111	4.873	4.98446	4.9966	4.60798	4.38546	4.42768	3.90662	4.29253	4.1444	5.61144	5.62988	5.5799	4.28128	4.65628	4.44387	0.693147	0.693147	0	3.61392	3.50627	3.58523
Retrotransposon	LTR	Gypsy	Gypsy	PtRLG_442_B_PIER	4.57354	4.56767	4.6057	3.21372	3.08756	3.11769	4.2456	4.23254	4.22397	6.78606	7.02549	7.02656	3.43023	3.37955	3.38553	5.32629	5.28022	5.38629	4.10399	4.12453	4.09234	5.58517	5.55872	5.61799	2.67069	2.69947	2.63906	4.74471	4.54447	4.67983
Retrotransposon	LTR	Gypsy	Gypsy	PtRLG_442_PIER	5.10437	4.9301	5.0147	3.67035	3.46532	3.51174	5.09952	5.12509	5.09866	7.77797	8.06358	8.04453	4.02651	3.96806	4.02581	5.93762	5.84926	5.89351	5.01658	5.03507	5.02678	6.12704	6.218	6.15513	2.38597	1.87009	2.05534	4.89341	4.89883	4.94902
Retrotransposon	LTR	Gypsy	Gypsy	PtRLG_444_PIER	3.53133	3.44042	3.48431	4.36657	4.46951	4.14494	3.93661	3.84572	3.96044	4.76952	4.83322	4.81097	5.54424	5.59711	5.5457	4.17812	4.10846	4.11719	3.41422	3.53573	3.52093	4.73067	4.74569	4.73165	1.79176	1.72277	1.28093	3.20893	3.3004	3.2589
Retrotransposon	LTR	Gypsy	Gypsy	PtRLG_445_PIER	2.98252	3.08111	2.98579	2.80963	2.56255	2.58669	4.51093	4.5002	4.49398	4.01373	4.32397	4.33595	6.25377	6.2494	6.29874	6.04946	5.99933	6.02765	4.55924	4.51889	4.51702	6.25052	6.23932	6.23389	0	0	0	6.55152	6.56061	6.5456
Retrotransposon	LTR	Gypsy	Gypsy	PtRLG_446_PIER	2.93141	2.88567	2.64468	5.09654	4.9018	5.05559	5.41803	5.40012	5.4263	5.25903	5.41066	5.38349	5.90576	5.90349	5.92074	4.90958	4.82698	4.84379	5.45387	5.47643	5.44767	5.47108	5.50837	5.52417	0.944462	1.62113	1.87877	3.65603	3.61372	3.66085
Retrotransposon	LTR	Gypsy	Gypsy	PtRLG_447_B_PIER	1.79176	1.38629	1.65823	3.83038	3.87301	3.9279	5.41247	5.4395	5.409	3.81011	4.16428	4.26965	3.07438	2.95582	2.72458	3.49612	3.41195	3.47498	5.7968	5.78211	5.78552	3.20753	3.22043	3.20032	1.0116	0.693147	0	3.59959	3.73899	3.69138
Retrotransposon	LTR	Gypsy	Gypsy	PtRLG_447_PIER	2.26765	2.17222	2.23851	2.7378	2.89433	2.79108	5.11938	5.12071	5.14877	3.53351	3.60063	3.59152	3.07375	2.95599	3.01318	2.8577	2.87446	2.87394	5.80515	5.76762	5.76828	3.08288	3.11215	3.00926	1.19824	1.113	1.25276	3.61668	3.6502	3.54215
Retrotransposon	LTR	Gypsy	Gypsy	PtRLG_448_C_PIER	3.60301	3.49491	3.4862	1.42712	1.83916	1.71765	5.64338	5.61272	5.63852	3.91794	3.92159	3.90209	2.64507	2.57183	2.56922	3.80808	3.66763	3.5961	5.73454	5.70103	5.66286	4.20673	3.9776	4.14719	1.80915	1.38629	1.58045	3.69993	3.70503	3.7174
Retrotransposon	LTR	Gypsy	Gypsy	PtRLG_448_D_PIER	4.50314	4.49758	4.42317	2.53793	2.57379	2.38129	5.79319	5.81513	5.79554	3.50808	3.44406	3.40849	3.16853	3.18582	3.03655	4.34568	4.30166	4.32646	4.88455	4.87555	4.86715	4.38976	4.39499	4.29872	2.31912	2.15948	2.55487	3.87697	3.83296	3.80918
Retrotransposon	LTR	Gypsy	Gypsy	PtRLG_448_PIER	5.29996	5.03212	5.12267	2.11124	1.94804	2.42775	6.01996	6.04327	6.03364	3.64825	4.01428	3.97664	2.74481	2.58137	2.59088	3.59331	3.51655	3.5967	5.87999	5.89135	5.86834	3.84411	3.92991	3.79581	1.23214	1.79176	1.47485	4.09472	4.01565	4.01133
Retrotransposon	LTR	Gypsy	Gypsy	PtRLG_450_B_PIER	1.098612289	1.32175584	1.299283893	1.665990254	1.462834017	1.982112575	3.667566437	3.675806879	3.640542312	3.030698758	2.996631869	2.960514339	1.957744136	2.270941679	2.131627125	1.714799228	1.709880354	1.677645943	5.127012898	5.059044433	5.090991799	1.848917698	1.841431784	1.751267281	1.349925976	1.098612289	1.262240769	2.435803937	2.409482427	2.306374903
Retrotransposon	LTR	Gypsy	Gypsy	PtRLG_450_PIER	0.949079	1.05416	1.10539	3.29427	3.59176	3.2224	4.01671	4.02054	4.02194	3.73179	3.73739	3.68254	2.83103	2.82725	2.88598	2.82291	2.75853	2.98635	5.04131	5.06788	5.02821	3.1848	3.23878	3.13749	1.54045	1.981	1.35239	3.99863	3.94754	3.91589
Retrotransposon	LTR	Gypsy	Gypsy	PtRLG_452_PIER	2.66414	2.80611	2.97714	1.89712	2.19339	1.92369	3.72315	3.671	3.76933	3.67426	3.82219	3.77344	4.60619	4.57777	4.64398	3.8479	3.7505	3.8739	3.80648	3.85807	3.85516	4.30686	4.30166	4.29825	3.34404	4.20965	4.12713	5.40982	5.40496	5.45131
Retrotransposon	LTR	Gypsy	Gypsy	PtRLG_453_PIER	2.28011	2.2679	2.46412	3.06572	3.00072	2.91539	4.19525	4.29683	4.19442	4.40607	4.72947	4.77068	6.04262	5.98726	6.05003	4.93391	4.91725	4.93003	4.43111	4.42783	4.42362	5.37316	5.40963	5.40669	1.79176	0.693147	0.693147	6.14218	6.10791	6.14783
Retrotransposon	LTR	Gypsy	Gypsy	PtRLG_454_PIER	3.23403	3.26808	3.23367	2.11223	1.9972	1.98787	3.63391	3.61092	3.65585	3.54779	3.84936	3.71879	5.58336	5.40645	5.42899	4.23269	4.19862	4.15267	3.73684	3.68845	3.70514	4.75407	4.81555	4.69766	0.693147	1.60944	1.14513	4.65947	4.70805	4.67359
Retrotransposon	LTR	Gypsy	Gypsy	PtRLG_455_PIER	4.69225	4.74384	4.72986	1.72722	1.83927	1.98565	4.43512	4.45502	4.46557	5.12743	5.15874	5.18851	2.41098	2.44506	2.44199	4.52956	4.49534	4.48864	4.14741	4.21963	4.19969	4.85453	4.88805	4.84084	2.5337	2.59371	3.27504	3.55347	3.51238	3.38521
Retrotransposon	LTR	Gypsy	Gypsy	PtRLG_457_PIER	1.99243	2.32962	2.41041	3.61477	3.35595	3.45729	5.27567	5.25808	5.28303	4.36499	4.67884	4.67081	3.83406	3.76525	3.75853	3.63806	3.46836	3.59083	5.30723	5.24708	5.26038	3.79581	3.80779	3.83555	2.8184	2.5616	2.17061	3.61887	3.7754	3.56381
Retrotransposon	LTR	Gypsy	Gypsy	PtRLG_458_B_PIER	0	0	0	0	0	0	2.62801	2.55793	1.16315	6.64115	6.56832	6.6222	0	0	0	0	0	1.38629	3.99999	4.08046	4.06995	0.693147	2.38482	0.693147	0	0	0	0	0	0
Retrotransposon	LTR	Gypsy	Gypsy	PtRLG_458_PIER	3.12702	2.93873	2.9715	4.36215	4.23956	4.20656	2.68606	2.45219	2.55048	6.31653	6.11039	6.11039	3.26037	3.22664	3.34221	3.53377	3.45712	3.58105	3.49615	3.50016	3.44388	3.53831	3.60743	3.52093	3.72252	3.01336	3.55057	3.53321	3.40475	3.42392
Retrotransposon	LTR	Gypsy	Gypsy	PtRLG_459_D_PIER	2.36713	2.63906	2.96183	1.12393	0.693147	0.693147	5.4827	5.48454	5.481	3.70071	4.08033	4.11003	1.09861	2.07944	1.79176	3.32504	3.12173	3.30979	5.84077	5.82472	5.84606	3.1054	3.48636	3.38491	0	0.693147	0	0	0.693147	1.26851
Retrotransposon	LTR	Gypsy	Gypsy	PtRLG_459_G_PIER	1.38629	1.20397	0.693147	0.693147	0.814506	0.693147	5.47878	5.44587	5.46398	3.60661	3.86722	3.92065	0.693147	0	0	3.58506	3.33386	3.57945	5.68115	5.67851	5.69015	3.57629	3.9573	4.0176	0	0.693147	0	0.693147	0.693147	0
Retrotransposon	LTR	Gypsy	Gypsy	PtRLG_459_PIER	2.74826	2.83321	2.80158	1.25016	1.32514	1.46929	4.38842	4.44966	4.37815	4.16868	4.4673	4.46617	7.14404	7.10869	7.12842	3.78471	3.87063	3.78558	4.35653	4.37724	4.36039	4.35755	4.17185	4.34564	1.38629	1.26113	0	4.66742	4.86186	4.73214
Retrotransposon	LTR	Gypsy	Gypsy	PtRLG_462_PIER	2.838	2.95078	2.88795	2.97834	2.65864	2.74944	5.02474	5.00998	5.02623	5.10742	5.57541	5.54702	5.67779	5.52811	5.63161	4.9503	5.0073	4.9393	5.19911	5.20562	5.21506	5.06963	5.10078	5.10774	0.693147	0.916291	0.693147	5.56745	5.60657	5.63359
Retrotransposon	LTR	Gypsy	Gypsy	PtRLG_463_PIER	1.820746911	1.32175584	1.394327013	1.189582763	1.44238401	1.098612289	4.978236062	5.00019431	4.962802671	3.732147255	3.965942847	3.895720844	2.871183275	2.676442568	3.141000766	2.647032585	2.934218507	3.059790992	6.191345613	6.053467043	6.110491254	3.007967122	3.028920404	3.032126882	0	1.098612289	1.098612289	2.991006123	3.482424004	2.971526667
Retrotransposon	LTR	Gypsy	Gypsy	PtRLG_465_C_PIER	1.6514	1.72924	1.56124	1.44817	1.60944	1.21245	5.29836	5.30365	5.29668	4.20056	4.23395	4.40752	3.85053	3.86456	3.78938	3.08095	3.02957	3.10168	5.44048	5.49196	5.449	3.71167	3.57369	3.67327	0	0	0.693147	2.29854	2.60621	2.29837
Retrotransposon	LTR	Gypsy	Gypsy	PtRLG_465_D_PIER	0.936768	0.693147	0.693147	0.693147	0.693147	0.958852	5.61013	5.60549	5.61447	3.78581	4.13324	4.13852	2.90653	2.94381	2.99643	2.71564	2.52491	2.69696	5.82238	5.82342	5.79828	2.56994	2.84491	2.66799	1.35239	0.693147	0.693147	1.74094	1.57515	1.94591
Retrotransposon	LTR	Gypsy	Gypsy	PtRLG_465_E_PIER	2.32342	2.32021	1.67161	2.14157	2.26949	1.59484	6.21846	6.21641	6.24282	4.06423	4.03268	4.06021	3.25686	3.25682	3.12196	2.98999	3.0932	2.93609	6.22889	6.22802	6.22522	3.29564	3.39896	3.33635	0	0.897943	0	1.97493	2.13163	1.87054
Retrotransposon	LTR	Gypsy	Gypsy	PtRLG_465_F_PIER	1.32914	1.05209	1.31885	1.335	1.28364	1.90478	5.8451	5.87068	5.86176	4.20267	4.19676	4.15718	3.82882	3.92549	3.87763	3.00347	2.7243	2.85877	5.86553	5.87337	5.89901	3.27533	3.0961	3.15588	0	0.693147	0	2.41591	2.32201	2.40049
Retrotransposon	LTR	Gypsy	Gypsy	PtRLG_465_G_PIER	5.22273	5.30847	5.31143	4.7232	4.62559	4.58904	4.60536	4.57752	4.63175	4.22746	4.89283	4.74097	4.22273	4.14925	4.15648	3.32662	3.12457	3.12855	4.53457	4.45557	4.44455	3.47616	3.5711	3.54749	6.29016	6.30471	6.56935	3.27532	3.38939	3.36378
Retrotransposon	LTR	Gypsy	Gypsy	PtRLG_465_H_PIER	1.403586487	1.656321498	1.560247668	1.704748092	1.572396263	2.073471255	5.063784199	5.089520409	5.108191435	3.064297053	3.06639109	3.026411807	2.493370728	2.466530505	2.461808599	2.20649591	2.073534127	2.323518453	5.059234964	5.005374815	5.084963242	2.21582932	2.159484634	2.099586022	1.098612289	1.291983682	1.609437912	1.555636211	1.502594075	1.794899534
Retrotransposon	LTR	Gypsy	Gypsy	PtRLG_465_PIER	1.48473	1.95382	1.89139	0.693147	0.834226	1.32176	6.12824	6.12624	6.13757	3.87437	4.19648	4.17639	3.45562	3.56727	3.52964	2.64632	2.62562	2.72226	6.0891	6.1046	6.10078	2.9744	3.04507	3.04792	0	0.693147	0.693147	1.86172	1.6985	1.854
Retrotransposon	LTR	Gypsy	Gypsy	PtRLG_466_B_PIER	0.693147	0.693147	1.04982	3.38681	3.65145	3.49448	4.05372	4.05663	4.07232	2.99262	3.08762	3.20575	3.25666	3.27479	3.23635	4.91891	4.93276	4.94357	4.15498	4.23432	4.21058	5.0829	5.12144	5.08376	0	0.693147	0	5.00276	4.85961	4.94099
Retrotransposon	LTR	Gypsy	Gypsy	PtRLG_466_C_PIER	1.335	1.19214	1.23676	1.85373	1.66771	1.89712	3.75729	3.71971	3.71119	2.60714	2.71399	2.72583	3.80442	3.96059	3.7466	5.37124	5.33238	5.30948	3.79366	3.80248	3.76536	5.39925	5.42297	5.4762	0	0.693147	0	3.41879	3.52807	3.51111
Retrotransposon	LTR	Gypsy	Gypsy	PtRLG_466_D_PIER	1.1815	0.987386	1.13943	3.56455	4.0556	3.5422	4.26046	4.26622	4.28047	2.374	2.32754	2.33811	5.12853	5.15778	5.2795	6.15631	6.19241	6.09263	4.3343	4.31354	4.38223	6.0235	6.04388	6.08551	1.59109	2.07944	1.38629	3.86559	3.87476	3.91162
Retrotransposon	LTR	Gypsy	Gypsy	PtRLG_466_E_PIER	4.48926	4.46288	4.37366	2.61982	2.53601	2.63394	5.19958	5.17757	5.17203	3.09865	3.25883	3.19655	5.09513	5.00045	5.09624	6.52871	6.46221	6.52807	5.37573	5.34688	5.40008	6.42041	6.39847	6.44929	0.693147	0.906721	0	5.60517	5.67175	5.59109
Retrotransposon	LTR	Gypsy	Gypsy	PtRLG_466_PIER	1.57351	1.60944	2.10095	3.85439	4.14578	4.19601	5.31505	5.2806	5.28628	3.03525	3.30277	3.19712	4.91088	4.78357	4.84938	6.73313	6.64397	6.67675	5.49023	5.45202	5.48322	6.63786	6.64778	6.61739	0	1.04455	0	5.44324	5.479	5.46228
Retrotransposon	LTR	Gypsy	Gypsy	PtRLG_467_PIER	3.47341	3.5109	3.11749	2.0178	1.65658	2.3732	4.38248	4.35397	4.41356	4.5231	4.70683	4.71622	6.17291	6.26461	6.1997	4.86933	4.67962	4.83604	4.389	4.41299	4.38324	5.31069	5.3556	5.2776	0.693147	1.116	0.938271	5.36495	5.5785	5.37536
Retrotransposon	LTR	Gypsy	Gypsy	PtRLG_468_PIER	1.35239	1.32176	2.5177	1.70475	0.693147	1.81529	4.98955	5.00471	5.05299	2.91397	3.59777	3.47415	5.40282	5.16713	5.3031	3.17458	3.10057	3.06805	4.85142	4.82872	4.81289	3.67006	3.71925	3.56139	1.79176	0	0.693147	3.89763	3.98689	4.04386
Retrotransposon	LTR	Gypsy	Gypsy	PtRLG_469_PIER	5.32688	5.33075	5.39984	2.25379	1.99536	3.24951	4.0157	3.9721	4.02408	5.20491	5.60567	5.60649	5.02435	5.01723	4.98765	3.7297	3.73005	3.76814	4.01587	4.06073	4.02731	4.14195	4.1188	4.13644	3.42318	3.34795	3.73237	3.99455	4.09928	4.12472
Retrotransposon	LTR	Gypsy	Gypsy	PtRLG_470_PIER	2.55754509	2.74253536	2.532124149	2.779787747	2.889076475	2.938431497	4.237769353	4.226611823	4.214551325	3.552948041	3.995683775	3.912718763	4.403034418	4.384784079	4.298408585	5.514710183	5.446879603	5.528805877	4.477771947	4.510999057	4.523699793	5.528460364	5.535383547	5.543414172	1.098612289	1.335001067	1.545924999	4.274797708	4.325583259	4.249239251
Retrotransposon	LTR	Gypsy	Gypsy	PtRLG_471_PIER	3.14307	3.23946	3.30241	2.65793	2.36167	2.54022	3.38748	3.45617	3.4641	4.3253	4.24095	4.17087	3.99267	4.01132	4.00246	4.85467	4.826	4.86853	3.28326	3.34109	3.29971	4.93816	5.02756	4.99541	1.17865	0.965081	0.81093	4.33351	4.28326	4.24999
Retrotransposon	LTR	Gypsy	Gypsy	PtRLG_473_PIER	3.573232885	3.471596819	3.350416237	1.558794933	1.53686722	1.384116992	4.933257366	4.924060186	4.900946908	4.291703872	4.809326617	4.784069226	2.288891766	2.310380629	2.256541154	2.735211309	2.837111618	2.771381744	5.123130299	5.107247656	5.11928639	2.991714212	3.037603318	3.134624272	1.098612289	1.098612289	1.098612289	2.430098413	2.437684006	2.463853241
Retrotransposon	LTR	Gypsy	Gypsy	PtRLG_474_PIER	4.71111	4.85641	4.78437	5.00001	4.98459	4.97695	4.7201	4.69389	4.73476	3.97987	3.98507	4.08026	5.06059	5.08035	5.02753	4.96355	4.86401	4.85229	4.60242	4.71073	4.65374	5.57309	5.58395	5.57766	1.96291	1.93713	1.90424	5.26444	5.21446	5.27161
Retrotransposon	LTR	Gypsy	Gypsy	PtRLG_475_B_PIER	3.15603	3.06134	3.14023	4.22086	4.45894	4.60218	5.15739	5.15305	5.16729	4.3498	4.66417	4.60736	4.37595	4.37691	4.41697	2.492	2.30396	2.43153	5.29871	5.2599	5.29236	3.03205	3.02147	3.07464	3.20275	3.17471	2.76786	2.50878	2.54012	2.56681
Retrotransposon	LTR	Gypsy	Gypsy	PtRLG_475_PIER	3.70853	3.72186	3.62439	4.67892	4.89421	4.60418	5.81766	5.81102	5.84499	4.81937	5.09048	5.06715	4.79018	4.81174	4.83316	2.73958	2.6324	2.7846	5.98952	5.97232	5.98669	3.33331	3.33026	3.22941	4.28716	3.86946	3.82507	2.99704	2.96862	2.94412
Retrotransposon	LTR	Gypsy	Gypsy	PtRLG_476_C_PIER	2.13127	2.09433	1.7631	2.02815	1.6007	1.81615	4.9457	4.95964	4.93581	3.13783	3.37997	3.47228	4.47803	4.38167	4.35853	4.11358	4.12242	4.10007	5.23553	5.18654	5.20236	4.5762	4.52592	4.48572	0.693147	0	0	4.35379	4.35895	4.34009
Retrotransposon	LTR	Gypsy	Gypsy	PtRLG_476_D_PIER	1.92334	2.31785	2.04835	0.908259	1.30625	0.693147	4.97221	4.99369	4.97435	5.4918	5.86192	5.86312	5.18041	5.12876	5.20222	4.15327	4.1375	4.16368	5.28681	5.28453	5.30623	4.21275	4.19164	4.2138	0	0	0	5.47092	5.40314	5.37659
Retrotransposon	LTR	Gypsy	Gypsy	PtRLG_476_PIER	1.7346	1.18847	1.71251	0.693147	0.987945	1.0245	4.93631	4.91263	4.95224	4.99721	5.35516	5.30042	5.27763	5.23298	5.33258	4.87731	4.67573	4.74831	5.11303	5.05887	5.07375	5.21187	5.21298	5.23038	1.25276	1.01857	0.693147	4.39291	4.46074	4.39682
Retrotransposon	LTR	Gypsy	Gypsy	PtRLG_478_PIER	2.85263	2.69848	2.7172	3.26459	3.20275	3.4159	4.27178	4.30611	4.30818	5.46045	5.75446	5.75494	3.09997	2.9106	2.86656	3.968	3.97545	3.93786	4.3285	4.32149	4.31199	4.09696	4.14411	4.12415	1.31568	1.50161	1.9534	2.25878	2.31338	2.1035
Retrotransposon	LTR	Gypsy	Gypsy	PtRLG_479_B_PIER	3.54726	4.00531	4.1473	2.997	3.2852	2.8997	5.55886	5.56638	5.58414	5.98543	6.19565	6.18498	4.6798	4.62729	4.60954	5.26801	5.1547	5.19336	5.5856	5.61311	5.60522	4.98498	4.93619	4.98801	2.64768	2.67815	2.98736	5.27558	5.26754	5.28835
Retrotransposon	LTR	Gypsy	Gypsy	PtRLG_479_PIER	3.53306	3.71008	3.80549	2.05727	2.69541	2.46562	5.54423	5.55604	5.54531	6.09443	6.32718	6.34463	4.71315	4.73858	4.75198	5.63519	5.6045	5.58621	5.61077	5.59837	5.58073	5.48952	5.42967	5.44867	3.40964	4.06873	3.36164	5.24902	5.22618	5.25595
Retrotransposon	LTR	Gypsy	Gypsy	PtRLG_484_PIER	4.65224	4.54441	4.46908	3.41833	3.08364	3.65066	3.52327	3.60605	3.50178	2.73807	2.90431	2.87695	5.63443	5.63403	5.54977	5.52005	5.33712	5.44873	3.05597	3.07946	3.07012	5.83704	5.86804	5.89511	3.84214	3.44893	3.88096	5.39059	5.35205	5.32711
Retrotransposon	LTR	Gypsy	Gypsy	PtRLG_492_PIER	3.70976	3.72749	3.59641	2.61931	2.65903	2.61994	5.21058	5.18371	5.18251	3.79791	4.11873	4.04122	4.71334	4.73625	4.68585	4.82355	4.76203	4.80244	4.97686	5.02842	4.95368	5.27806	5.31385	5.26376	3.61631	3.60427	3.37939	3.99978	3.93778	3.97182
Retrotransposon	LTR	Gypsy	Gypsy	PtRLG_495_PIER	3.22753	3.1689	2.89037	2.90362	3.26321	3.36192	3.30174	3.28126	3.31036	4.07785	4.47215	4.45374	4.36789	4.425	4.40631	3.19217	3.0372	3.09662	3.30235	3.23166	3.23935	3.3823	3.32851	3.55325	2.25712	2.73622	2.5194	4.91807	4.93363	5.00262
Retrotransposon	LTR	Gypsy	Gypsy	PtRLG_499_PIER	3.84595	3.9322	3.88213	4.98895	5.08402	4.9057	4.70343	4.72653	4.72367	4.89659	4.99306	4.96551	4.34736	4.41636	4.34472	4.18283	4.19043	4.05	4.61334	4.62406	4.60206	4.37295	4.32261	4.43544	2.65676	2.36167	2.52229	4.73321	4.67554	4.79677
Retrotransposon	LTR	Gypsy	Gypsy	PtRLG_5_PIER	1.16575	1.26224	1.48503	2.3896	1.99243	2.08286	6.38522	6.2716	6.31129	6.06302	6.35044	6.3478	3.64031	3.83602	3.70636	4.18254	4.1828	4.28844	6.20608	6.31152	6.20109	4.11687	4.10648	4.14371	0	0	0.693147	2.99814	2.97331	2.97893
Retrotransposon	LTR	Gypsy	Gypsy	PtRLG_500_PIER	2.85916	2.81748	2.77009	1.53248	1.55537	1.75402	3.98188	3.99251	4.05976	5.3358	5.61546	5.55318	5.34942	5.4045	5.41116	3.77431	3.69238	3.66025	4.77843	4.74571	4.77523	4.22454	4.29165	4.187	2.53237	4.12713	3.56483	4.91539	4.74528	4.88923
Retrotransposon	LTR	Gypsy	Gypsy	PtRLG_501_PIER	3.53669	3.35029	3.5453	3.26248	3.13852	3.02664	2.51171	2.65982	2.57755	3.57411	3.61595	3.59049	4.87956	4.90818	5.00574	5.7783	5.74497	5.80857	4.02445	4.03405	4.0019	5.66905	5.52753	5.56309	2.76642	2.72822	2.81002	4.82124	4.8837	4.87022
Retrotransposon	LTR	Gypsy	Gypsy	PtRLG_502_PIER	3.93462	3.98898	3.88702	1.58045	1.06784	1.25276	4.3889	4.42114	4.45265	5.21498	5.42638	5.42083	5.18063	5.15408	5.20088	2.84213	2.62554	2.72879	4.46025	4.49781	4.44578	3.75459	3.78419	3.63671	0.99853	0.693147	0.693147	4.17999	4.03167	4.06013
Retrotransposon	LTR	Gypsy	Gypsy	PtRLG_503_PIER	4.2713	4.32198	4.3612	2.80024	2.64024	2.64583	3.75528	3.81965	3.79897	2.6449	2.83499	2.78566	4.61438	4.50249	4.47167	4.85266	4.83646	4.99228	4.5491	4.48618	4.50211	5.19955	5.21686	5.10207	2.58854	2.17222	2.2192	2.91045	2.74402	2.83418
Retrotransposon	LTR	Gypsy	Gypsy	PtRLG_504_PIER	3.04061	2.91818	2.83773	2.26223	2.28946	2.29422	6.30509	6.31328	6.29648	6.6959	6.98404	6.97004	5.53761	5.39988	5.42151	4.62276	4.64455	4.62765	6.30131	6.29742	6.29608	4.76987	4.90422	4.81266	1.23214	1.38629	0.693147	4.85011	4.81303	4.78927
Retrotransposon	LTR	Gypsy	Gypsy	PtRLG_506_PIER	2.89157	2.74986	2.86537	3.28047	3.53439	3.27668	3.93802	3.90879	3.89548	4.86089	5.24944	5.22176	6.37459	6.36944	6.32287	5.16349	5.09427	5.10388	4.09451	4.09097	4.06926	5.5463	5.55658	5.49671	1.38629	1.38629	0.693147	6.04995	6.04049	6.02461
Retrotransposon	LTR	Gypsy	Gypsy	PtRLG_508_PIER	2.93511	3.07143	3.00225	3.93097	4.06372	3.80499	3.47676	3.33508	3.36503	4.52202	4.7709	4.72935	5.65899	5.66594	5.61877	5.38923	5.40709	5.39034	3.49716	3.4009	3.45709	5.33871	5.41181	5.38171	5.13015	4.96245	4.96572	5.41761	5.49097	5.47178
Retrotransposon	LTR	Gypsy	Gypsy	PtRLG_509_PIER	2.95565	2.79525	2.93657	2.18864	2.16992	2.00786	4.52567	4.54198	4.49239	4.80885	4.97978	5.01463	4.08302	3.82999	4.03777	4.0595	3.9378	3.87338	4.44011	4.44323	4.42749	4.17312	4.20621	4.24684	0	0	0	3.71449	3.53844	3.54758
Retrotransposon	LTR	Gypsy	Gypsy	PtRLG_510_PIER	3.8252	3.69319	3.78831	3.13316	3.02798	2.97701	3.87534	3.82914	3.81517	5.33518	5.66896	5.61918	4.22173	4.22299	4.27025	3.8851	3.92213	3.87705	3.69132	3.71147	3.67837	3.88739	4.08443	3.7626	2.25129	2.17475	2.07944	4.4606	4.37718	4.36071
Retrotransposon	LTR	Gypsy	Gypsy	PtRLG_511_B_PIER	4.49259	4.64714	4.43082	4.19023	4.1315	3.98727	4.93711	4.93101	4.94425	4.85415	5.04404	5.03151	3.15621	3.20028	3.23431	4.57753	4.38884	4.30133	4.8437	4.81215	4.818	4.62321	4.56377	4.52844	1.63761	2.04769	2.10191	3.2846	3.22364	3.30811
Retrotransposon	LTR	Gypsy	Gypsy	PtRLG_511_PIER	4.35955	4.06433	3.97906	3.99682	4.37631	4.27753	5.03572	5.0674	5.06411	5.1893	5.38356	5.36414	3.34078	3.3988	3.3322	4.2741	4.08915	4.08583	4.96038	4.97817	4.96935	4.26501	4.3322	4.33873	2.07227	2.30863	2.43142	2.76313	2.82685	2.80565
Retrotransposon	LTR	Gypsy	Gypsy	PtRLG_512_PIER	2.86606	3.02555	2.86656	2.46293	2.65196	3.00216	4.46037	4.48873	4.46163	4.7048	5.20739	5.13433	5.50648	5.43753	5.46615	4.0476	3.90282	3.98817	4.66406	4.63433	4.58213	4.21438	4.19354	4.30017	0	1.12847	0.693147	3.93531	4.01453	3.93764
Retrotransposon	LTR	Gypsy	Gypsy	PtRLG_516_PIER	2.52522	2.56809	2.7178	2.24412	2.2399	2.42888	4.32095	4.28442	4.30492	4.24687	4.60176	4.58528	5.41096	5.45233	5.38734	4.74827	4.75009	4.71904	4.87097	4.89646	4.89379	5.13045	5.09647	5.08297	2.23359	2.64853	2.20166	5.79708	5.79035	5.7798
Retrotransposon	LTR	Gypsy	Gypsy	PtRLG_517_PIER	3.07336	2.92245	3.00295	3.02236	3.23829	3.25553	5.37409	5.34306	5.36114	3.68482	3.28729	3.19428	3.73398	3.73425	3.82509	3.2409	3.082	3.15093	5.31126	5.40343	5.35336	3.81507	3.76694	3.64388	2.43465	2.31206	2.20728	1.96611	1.96305	1.93368
Retrotransposon	LTR	Gypsy	Gypsy	PtRLG_518_PIER	2.70911	2.91531	2.62104	1.04145	2.04554	0.813775	3.86818	3.91592	3.90967	3.42505	3.59774	3.63012	5.91836	5.86854	5.91251	3.87326	3.86747	3.81902	3.89779	3.82619	3.79152	4.60868	4.48145	4.59852	0.967584	1.38629	1.60944	5.00147	5.00422	5.05951
Retrotransposon	LTR	Gypsy	Gypsy	PtRLG_519_PIER	2.99854	2.88166	2.80244	3.11203	3.20545	3.0398	3.62854	3.5619	3.60206	3.77986	3.85274	3.87314	3.32595	3.27903	3.36625	3.48404	3.41438	3.38188	5.31116	5.27285	5.26322	3.58914	3.58689	3.74073	2.69968	2.77259	2.79506	4.5819	4.34834	4.44131
Retrotransposon	LTR	Gypsy	Gypsy	PtRLG_52_PIER	1.42266	1.25276	0.693147	2.36939	2.05127	2.0206	4.60143	4.57308	4.58567	4.80014	4.40321	4.38653	3.52007	3.50216	3.385	4.45633	4.44362	4.48606	6.03588	6.04646	6.03045	5.09499	5.05992	5.08679	0.693147	0	1.38629	2.86304	2.66653	2.81314
Retrotransposon	LTR	Gypsy	Gypsy	PtRLG_521_B_PIER	0	0	0	0.693147	0	0	6.81181	6.77187	6.7672	0.693147	0	0	2.36713	1.7346	1.79176	5.21358	4.93627	5.17332	6.81721	6.80578	6.78532	6.16279	6.08728	6.24804	0.693147	0	0	3.2581	2.5123	3.1209
Retrotransposon	LTR	Gypsy	Gypsy	PtRLG_521_C_PIER	1.54536	1.84372	2.03065	2.87057	2.27849	2.56271	6.63689	6.62616	6.61441	1.79505	2.00666	1.91487	5.03587	5.04695	5.01767	6.31787	6.28654	6.33593	7.15409	7.15016	7.14421	6.29283	6.27158	6.32881	0.693147	0.693147	0.693147	4.78779	4.8036	4.81351
Retrotransposon	LTR	Gypsy	Gypsy	PtRLG_521_PIER	2.063693185	2.217225442	2.315543766	1.849578591	1.869601295	1.578184575	5.810775657	5.828160015	5.821710685	2.824237891	3.077584113	3.333104105	2.090518713	2.149918644	2.42221531	2.992175957	2.976931644	2.857963344	6.367562635	6.237900707	6.225955473	2.727153237	2.920065395	2.941608662	1.819158984	1.721800059	1.845826164	2.573138809	2.361569783	2.513388821
Retrotransposon	LTR	Gypsy	Gypsy	PtRLG_522_B_PIER	5.30352	5.27051	5.29895	2.27513	2.40039	2.38344	4.23208	4.18697	4.1759	4.14418	4.1588	4.05084	2.93332	3.01082	2.77838	4.31682	4.24119	4.39099	4.07476	4.03601	4.06279	4.52866	4.53133	4.38102	1.72839	1.94591	1.9231	3.10136	3.23695	3.13211
Retrotransposon	LTR	Gypsy	Gypsy	PtRLG_523_B_PIER	3.08389	3.41728	2.84214	4.72658	4.94977	4.93824	3.83735	3.85046	3.86227	4.91882	5.02997	4.99474	2.98568	2.96763	2.88061	3.20842	3.08383	3.1248	4.97702	4.96369	5.01008	3.46234	3.37397	3.35418	3.01553	3.23024	2.45101	4.8241	4.79443	4.75919
Retrotransposon	LTR	Gypsy	Gypsy	PtRLG_523_C_PIER	1.56563	1.29735	1.46634	3.20603	2.7469	3.49651	2.92183	2.89488	2.89791	5.16868	5.44942	5.43242	2.97798	2.61496	2.68303	2.65762	2.73127	2.55619	3.62266	3.55788	3.60206	3.02917	3.06817	3.05115	2.41821	3.09536	3.20376	3.37049	3.49222	3.3167
Retrotransposon	LTR	Gypsy	Gypsy	PtRLG_523_E_PIER	0	0	0	0	0	0	3.88869	3.82264	3.84538	4.54782	5.05109	5.11039	0	0	0	0	0	0	4.1762	4.14153	4.07187	0	0	0	0	0	0	0	0	0
Retrotransposon	LTR	Gypsy	Gypsy	PtRLG_523_PIER	1.9057	1.86895	1.66771	3.52114	3.50656	3.58173	3.98027	4.02315	4.02301	5.91713	6.16179	6.11141	3.31803	3.28423	3.32328	3.46892	3.49276	3.49554	4.94188	4.95274	4.98365	3.79498	3.88854	3.82898	4.37042	3.80419	4.53177	4.32534	4.33596	4.31999
Retrotransposon	LTR	Gypsy	Gypsy	PtRLG_528_PIER	1.12847	1.53393	1.25276	2.79525	2.59026	2.99773	3.6674	3.63378	3.62407	5.58907	5.68089	5.67686	2.4386	2.30776	2.38811	2.35344	2.29439	2.26693	4.37658	4.42701	4.39607	2.45811	2.49574	2.66901	2.7379	1.03942	1.79176	3.48458	3.36176	3.46323
Retrotransposon	LTR	Gypsy	Gypsy	PtRLG_529_PIER	3.14059	3.26018	3.17393	2.3557	2.64696	2.42548	3.80325	3.82807	3.86792	4.09091	4.2551	4.26914	7.1301	7.14113	7.18995	5.36564	5.44036	5.36806	3.78401	3.73187	3.75466	5.71809	5.58958	5.56653	0	0	0	3.89672	3.76551	3.67883
Retrotransposon	LTR	Gypsy	Gypsy	PtRLG_531_PIER	3.60798	3.70868	3.52391	3.34693	3.39396	3.51763	4.34552	4.28271	4.28167	5.67202	5.82437	5.81181	3.56928	3.44738	3.53503	3.24097	3.1445	3.17331	3.68435	3.68059	3.70107	3.23915	3.49188	3.57008	1.82813	2.54945	2.3206	3.22552	3.21617	3.30796
Retrotransposon	LTR	Gypsy	Gypsy	PtRLG_535_PIER	4.82117	4.70877	4.73356	3.20333	3.22767	3.38005	4.02359	4.02405	3.9847	4.20316	4.60827	4.57925	3.49581	3.52226	3.46948	4.22058	4.1533	4.22341	5.38843	5.37613	5.39525	4.70212	4.75621	4.6509	3.15226	3.33957	3.03628	3.75597	3.97105	3.83991
Retrotransposon	LTR	Gypsy	Gypsy	PtRLG_536_PIER	1.39937	1.55429	1.46425	1.25276	1.7463	0.950978	4.28855	4.3174	4.30722	3.82656	4.109	4.13582	5.03139	5.14326	4.85062	2.40599	2.19722	2.12505	4.49968	4.45957	4.4386	2.9245	2.85726	2.81849	1.14513	0.693147	0.693147	5.18178	5.16419	5.26553
Retrotransposon	LTR	Gypsy	Gypsy	PtRLG_537_D_PIER	4.062595864	4.346917458	4.262679877	4.7582174	4.59511985	5.081404365	3.48901288	3.521611028	3.448929844	3.245844869	3.529590596	3.492672946	2.082814597	2.271332788	2.004320557	3.421000009	3.350072494	3.677553052	4.114441264	3.998156664	4.042386134	3.754702306	3.682848806	3.587757167	4.987025428	4.165557634	5.078293943	3.33220451	3.33544568	2.889076475
Retrotransposon	LTR	Gypsy	Gypsy	PtRLG_537_F_PIER	4.88191	4.72583	4.54683	0.693147	1.44692	0.693147	3.73834	3.73602	3.76128	3.81471	4.04422	4.07835	3.65862	3.67279	3.71194	3.89639	4.27898	3.8986	3.65308	3.77787	3.71613	3.95801	3.8216	3.52894	1.38629	0.693147	0.693147	5.98735	5.93627	5.17673
Retrotransposon	LTR	Gypsy	Gypsy	PtRLG_537_PIER	2.86718	2.84054	2.85588	1.75153	1.43176	1.46634	5.92156	5.89962	5.90378	5.31368	5.62342	5.66879	4.55788	4.42773	4.51634	3.99145	4.04638	3.9558	6.19505	6.17699	6.17667	4.483	4.50522	4.50491	0.693147	0.693147	0	3.70762	3.89502	3.79262
Retrotransposon	LTR	Gypsy	Gypsy	PtRLG_538_C_PIER	3.36917	3.40357	2.94728	2.19722	2.31395	1.94895	5.24284	5.23081	5.20112	4.94511	5.1207	5.10743	4.00967	3.89893	3.98502	3.5004	3.3194	3.39804	5.47974	5.43374	5.47326	3.7467	3.71685	3.69267	0	0	0.693147	4.40567	4.31704	4.44932
Retrotransposon	LTR	Gypsy	Gypsy	PtRLG_538_PIER	3.03082	2.88211	3.22415	1.73716	1.37118	1.74297	5.15946	5.16946	5.20552	4.69448	5.05436	5.06147	3.95407	3.83512	4.02389	3.96785	4.00461	3.89219	5.52943	5.49096	5.5981	3.86201	3.89234	3.8066	1.09861	1.09861	0.693147	3.67331	3.79158	3.77001
Retrotransposon	LTR	Gypsy	Gypsy	PtRLG_541_PIER	2.83321	2.77259	1.59263	1.98228	2.44235	2.27644	4.65789	4.65739	4.67731	4.69512	4.89256	4.9367	4.31437	4.37825	4.36606	5.90471	5.8218	5.83221	4.64742	4.65721	4.64607	5.59085	5.68021	5.58865	1.47331	1.6181	2.22708	4.28424	4.26062	4.19159
Retrotransposon	LTR	Gypsy	Gypsy	PtRLG_542_PIER	4.99856	4.96085	5.01008	3.93987	3.84506	4.00132	4.93731	4.91112	4.91997	3.44254	3.65919	3.62006	4.27633	4.26522	4.27541	5.27282	5.26372	5.27857	4.63616	4.58958	4.59086	5.67868	5.67233	5.67782	2.49387	2.76748	2.33583	4.00266	4.04412	3.93605
Retrotransposon	LTR	Gypsy	Gypsy	PtRLG_543_PIER	3.04831	3.29939	3.19052	2.56082	2.43778	2.58051	4.60848	4.60638	4.6295	4.7337	4.73351	4.73279	4.77836	4.77464	4.71191	4.84372	4.76299	4.79169	4.4483	4.42745	4.43706	5.448	5.46006	5.4977	2.10006	2.02537	2.14007	3.64033	3.63204	3.66825
Retrotransposon	LTR	Gypsy	Gypsy	PtRLG_545_PIER	2.68254	1.95404	2.15822	1.81571	1.7755	1.63852	3.93343	3.98387	4.03904	5.26557	5.20301	5.1827	3.5332	3.56284	3.56303	4.36536	4.36367	4.36708	3.72577	3.75704	3.77456	5.80029	5.82147	5.83754	1.29928	0.693147	0.693147	3.39813	3.53322	3.48602
Retrotransposon	LTR	Gypsy	Gypsy	PtRLG_547_PIER	2.05306	2.11318	2.116	1.0116	1.35963	0.693147	5.02474	5.01519	5.02424	4.89738	5.08326	5.08859	4.7329	4.91429	4.70192	3.23376	3.19214	3.23697	4.98774	4.94243	4.97214	3.95972	4.00414	3.84451	1.04145	0.693147	0.693147	5.0324	4.9987	5.06032
Retrotransposon	LTR	Gypsy	Gypsy	PtRLG_548_PIER	3.29584	3.15506	3.04927	2.42154	2.4689	2.32456	3.60957	3.71212	3.67974	4.25825	4.57823	4.41565	5.07011	5.11421	5.12384	3.33422	3.32891	3.19867	3.85924	3.83234	3.85056	3.64589	3.7545	3.65646	0	0	0	4.2354	4.20712	4.27045
Retrotransposon	LTR	Gypsy	Gypsy	PtRLG_551_PIER	4.26051	4.14525	4.06948	3.5128	3.5362	3.69865	5.67579	5.67577	5.6834	5.86937	6.11126	6.12845	4.42747	4.50328	4.46937	4.36739	4.37081	4.37881	5.77368	5.7428	5.76595	4.56256	4.68394	4.57698	2.3254	2.10569	1.78339	3.3938	3.34533	3.39121
Retrotransposon	LTR	Gypsy	Gypsy	PtRLG_552_PIER	3.31454	3.16294	3.08191	4.0872	4.19697	4.12433	3.74688	3.77962	3.78737	4.45855	4.46629	4.42679	3.74054	3.73899	3.7405	4.00497	3.84725	3.99995	5.16008	5.17081	5.15721	4.08381	4.0448	3.9747	5.24591	5.04162	4.75072	4.51175	4.52725	4.57289
Retrotransposon	LTR	Gypsy	Gypsy	PtRLG_553_PIER	2.991699151	2.787779013	2.975192775	1.33889086	1.208960346	1.547562509	3.900711268	3.890997511	3.914677479	2.931193752	2.91861362	3.029679491	2.6003759	2.418392846	2.577083137	5.128649414	4.625315892	4.355613355	4.053918323	4.049202486	4.042626616	4.969396546	4.642254002	4.87653231	1.734601644	1.349925976	1.413693065	2.680363778	2.934431173	2.7178289
Retrotransposon	LTR	Gypsy	Gypsy	PtRLG_555_PIER	2.14843	1.85275	2.3979	0.693147	0.693147	0.693147	3.79678	3.88618	3.87425	3.41424	3.46898	3.49762	4.79146	4.7628	4.79435	4.35448	4.55594	4.54198	3.72858	3.74715	3.78028	4.89085	4.86858	5.05141	0	0	0.693147	5.12675	5.32404	5.22072
Retrotransposon	LTR	Gypsy	Gypsy	PtRLG_556_PIER	3.93683	4.0399	3.99105	1.82016	1.80555	1.75786	5.07993	5.11139	5.1359	4.32786	4.58102	4.56356	5.27779	5.16188	5.21494	4.14246	4.13998	4.1494	5.06204	5.05896	5.09086	4.56014	4.52474	4.6317	2.21499	1.84124	2.42037	4.82304	4.7815	4.79738
Retrotransposon	LTR	Gypsy	Gypsy	PtRLG_557_B_PIER	6.14643	5.9595	5.94377	2.457	2.33075	2.52817	4.24404	4.24981	4.2365	3.86079	4.07261	4.07858	2.28465	2.30405	2.21887	4.19852	4.23417	4.20049	4.2467	4.19931	4.17404	4.45641	4.44702	4.39934	2.02094	2.02961	1.94157	4.41899	4.37419	4.52179
Retrotransposon	LTR	Gypsy	Gypsy	PtRLG_557_D_PIER	1.29928	0.693147	0	0	0	0	5.35445	5.33985	5.31549	3.21677	2.98616	2.90541	0.693147	0.693147	1.69168	0.693147	0.693147	0	5.26369	5.33762	5.28324	0	0	0	0	0	0	1.31219	0.693147	0.693147
Retrotransposon	LTR	Gypsy	Gypsy	PtRLG_557_PIER	5.73635	5.57688	5.77034	2.86035	2.73703	2.97802	5.50848	5.47696	5.54678	5.5574	5.79831	5.75563	3.17854	3.25631	3.28856	4.71055	4.56314	4.6059	5.46305	5.48084	5.47012	4.80649	4.82189	4.83936	1.89712	2.09951	2.75002	4.39457	4.52166	4.42751
Retrotransposon	LTR	Gypsy	Gypsy	PtRLG_558_B_PIER	1.20397	0.847296	0.693147	0.693147	0	1.335	4.9318	4.88929	4.89237	3.76074	4.31933	4.28551	4.74431	4.52864	4.63424	4.38355	4.46796	4.33826	5.15006	5.14672	5.09541	4.56996	4.53618	4.48949	0	0.693147	0	3.87567	3.76819	3.7028
Retrotransposon	LTR	Gypsy	Gypsy	PtRLG_558_PIER	1.67917	1.56678	1.71532	1.1815	1.77978	1.10444	5.14425	5.15218	5.1561	4.3417	4.71064	4.71048	4.9721	5.01253	4.95907	3.53806	3.53154	3.6437	5.05881	5.05434	5.03899	4.06007	4.08583	3.97247	1.02962	0.693147	1.38629	5.06948	4.92132	4.95617
Retrotransposon	LTR	Gypsy	Gypsy	PtRLG_56_PIER	3.90834	3.72862	3.89409	3.34503	3.34411	3.42252	4.73462	4.73817	4.74381	6.05302	6.37243	6.37463	4.41593	4.43343	4.43823	5.87743	5.81015	5.83151	4.42499	4.4519	4.43441	6.85173	6.86736	6.87718	0.693147	0	0	3.71893	3.71365	3.6694
Retrotransposon	LTR	Gypsy	Gypsy	PtRLG_561_PIER	3.95857	4.01337	4.14208	1.38629	1.43075	1.44456	4.43758	4.43918	4.49265	4.58303	4.77303	4.74039	5.15573	5.12459	5.36502	4.76067	4.36448	4.62317	4.35332	4.39756	4.33157	4.97775	5.04791	4.99762	0.693147	1.48808	1.76578	3.75794	3.72998	3.78952
Retrotransposon	LTR	Gypsy	Gypsy	PtRLG_564_B_PIER	0	0	0	0	0	0	4.44555	4.47569	4.42766	5.782	5.77392	5.73179	0	0	0	0	0.693147	0	3.8712	4.00654	4.17439	1.18562	0.693147	0	0	0	0	0	0	0
Retrotransposon	LTR	Gypsy	Gypsy	PtRLG_564_PIER	2.38774	2.28677	2.33587	2.59983	2.70985	2.7051	4.50356	4.53541	4.53425	4.981	5.02538	4.99251	3.00546	2.9795	2.83281	3.27265	3.25444	3.2677	4.25289	4.27943	4.31339	3.53248	3.4842	3.48857	0.818312	1.52606	1.0033	3.39409	3.38777	3.41045
Retrotransposon	LTR	Gypsy	Gypsy	PtRLG_565_PIER	3.10234	3.31621	3.12013	5.05767	4.78342	4.94613	4.56525	4.57186	4.52657	4.07446	3.99811	4.00031	3.837	3.87631	3.84978	3.74493	3.78419	3.83047	4.78744	4.79347	4.74853	3.60721	3.62514	3.63991	2.53142	2.74442	2.43838	4.01948	3.92219	3.91332
Retrotransposon	LTR	Gypsy	Gypsy	PtRLG_566_B_PIER	4.66407	4.38826	4.41525	3.94332	3.83483	3.79722	4.16427	4.16395	4.1749	5.06297	5.73892	5.76144	4.38296	4.32647	4.33391	4.3356	4.3401	4.3159	4.49661	4.48766	4.51034	4.1035	4.09616	4.15492	4.46127	4.821	4.57176	4.49829	4.44612	4.55057
Retrotransposon	LTR	Gypsy	Gypsy	PtRLG_566_PIER	4.71701	4.2485	4.23531	2.54615	2.62045	2.41801	5.07244	5.07186	5.05902	5.70423	6.22743	6.22146	4.71404	4.73512	4.70887	5.05603	5.01425	5.0255	5.21748	5.18363	5.2218	4.78637	4.74104	4.76	4.01251	3.29258	4.06201	5.04744	5.01207	5.01513
Retrotransposon	LTR	Gypsy	Gypsy	PtRLG_568_PIER	4.44994	4.47609	4.46143	3.19373	3.01981	2.83368	4.08506	4.06095	4.05347	3.27994	3.54605	3.43625	3.11087	3.17955	3.2127	5.04443	5.14321	5.10659	3.30526	3.4431	3.39846	5.23252	5.27536	5.22973	2.32497	2.60132	2.4764	4.86106	4.96792	4.93781
Retrotransposon	LTR	Gypsy	Gypsy	PtRLG_569_PIER	5.778190878	5.826280304	6.644310431	3.002851869	2.637312952	3.012259936	3.730498731	3.708044623	3.730498731	3.069354413	3.604296036	3.599553583	3.158301702	2.983462304	3.042654027	3.177186788	3.022598133	2.894070465	4.027966127	3.910838304	3.965580834	3.002772433	3.168752372	3.175400313	1.717651753	1.591892895	1.514126733	3.232691941	3.168916377	3.253586383
Retrotransposon	LTR	Gypsy	Gypsy	PtRLG_571_C_PIER	2.55981	2.44854	2.89999	1.04597	0.693147	1.59393	3.11133	3.13122	3.13112	3.65543	3.92362	3.84723	5.65722	5.58304	5.83445	2.36922	2.34353	2.2392	3.17152	3.22083	3.16777	2.75978	2.69431	2.69505	0	0	0	2.71379	2.45328	2.39873
Retrotransposon	LTR	Gypsy	Gypsy	PtRLG_571_D_PIER	2.58022	2.52399	2.76879	1.65377	1.87915	1.83217	5.77783	5.78437	5.81064	5.46616	5.81248	5.78699	5.05197	5.10742	5.09201	4.0903	3.99748	4.07635	6.02647	6.04325	6.03292	4.30393	4.30602	4.27456	0.693147	0	0	4.46948	4.40824	4.48293
Retrotransposon	LTR	Gypsy	Gypsy	PtRLG_571_PIER	2.93755	2.75513	2.71948	1.88273	1.85976	2.25712	5.55587	5.53229	5.52865	5.28278	5.63252	5.53166	4.91755	4.79452	4.93687	4.61078	4.42508	4.62938	5.74135	5.76132	5.72824	4.64301	4.57868	4.56764	0.693147	0	0.693147	4.28523	4.48446	4.66792
Retrotransposon	LTR	Gypsy	Gypsy	PtRLG_572_PIER	4.34827	4.78106	4.46026	3.5331	3.67468	3.6456	5.50339	5.51793	5.49919	5.56564	5.9673	6.01853	4.25907	4.2316	4.22148	5.28379	5.25981	5.26373	5.54218	5.56155	5.54042	6.13204	6.16538	6.12456	2.07014	2.8467	2.97553	3.50146	3.49977	3.56969
Retrotransposon	LTR	Gypsy	Gypsy	PtRLG_575_PIER	4.56327	4.56302	4.72423	1.55585	1.68401	2.00798	3.97022	3.97564	3.973	3.53664	3.69388	3.6522	6.52126	6.4816	6.42193	5.76777	5.7195	5.65315	3.91414	3.84916	3.87181	6.09209	6.10933	6.13672	4.07923	3.0935	4.34381	6.14213	6.19458	6.19625
Retrotransposon	LTR	Gypsy	Gypsy	PtRLG_576_PIER	3.85884	3.68372	3.81643	3.99812	3.81691	3.76988	4.18524	4.19559	4.15388	4.19326	4.67278	4.62519	5.02811	5.15977	5.02858	5.24495	5.15653	5.29197	4.2383	4.29085	4.25182	5.09857	5.24301	5.19971	1.07264	0.693147	0	3.95397	4.03757	4.08448
Retrotransposon	LTR	Gypsy	Gypsy	PtRLG_577_PIER	1.98983	2.08833	2.02002	0.847296	0.693147	1.09861	3.97009	4.0522	4.04022	4.78568	5.00889	4.99541	4.07012	3.95747	4.13018	3.60992	3.4833	3.49606	3.89925	4.04185	4.04882	4.48622	4.44033	4.6064	0	2.03688	0.693147	2.55464	2.3792	2.69124
Retrotransposon	LTR	Gypsy	Gypsy	PtRLG_579_B_PIER	0	0	0	0	0	0	3.28116	3.41551	3.04756	5.39869	5.62876	5.56765	2.72813	2.86695	2.63282	4.19995	4.01521	4.22926	6.01298	5.91651	6.02151	3.86406	3.87829	3.76341	0	0	0	3.88414	4.04759	4.11671
Retrotransposon	LTR	Gypsy	Gypsy	PtRLG_579_C_PIER	0	0	0	0	0	0.693147	3.22476	3.16568	3.2892	5.34808	5.62217	5.61768	3.29053	2.62708	3.16054	4.38935	4.25166	4.2671	5.30858	5.27279	5.24601	3.78808	4.00935	4.02051	0	0	0	4.47663	4.46116	4.51429
Retrotransposon	LTR	Gypsy	Gypsy	PtRLG_579_D_PIER	0	0	0	0	0	0	4.15674	4.34065	4.09249	3.25369	3.70329	3.885	0	1.38629	0.693147	2.3979	1.94591	1.55814	6.00147	6.02857	6.03404	2.30259	2.69848	0.693147	0	0	0	2.85811	1.79176	2.94444
Retrotransposon	LTR	Gypsy	Gypsy	PtRLG_579_PIER	3.263577643	2.830191135	2.818225109	2.689736864	2.756726073	2.823133299	3.973671103	3.938972581	4.006936743	3.432725118	3.59339776	3.488423458	2.815773922	2.760832387	2.666623857	2.780749086	2.902975331	2.951503441	5.627369283	5.565362964	5.590281508	2.933159818	3.022413152	3.054510486	3.318851468	3.14391087	3.231732818	3.621290953	3.46344265	3.473797074
Retrotransposon	LTR	Gypsy	Gypsy	PtRLG_580_B_PIER	4.22204	4.21252	4.22299	1.92014	1.92571	2.18079	4.68118	4.63692	4.65193	4.97655	4.61976	4.66322	2.52675	2.54118	2.41557	4.62375	4.58126	4.58593	6.06246	6.01956	6.031	4.97265	4.90193	4.92767	1.96503	2.33408	2.59026	3.81465	3.90918	3.96662
Retrotransposon	LTR	Gypsy	Gypsy	PtRLG_580_C_PIER	4.10936	4.26949	4.07132	1.72277	1.80693	1.76544	6.09563	6.12	6.12487	3.68202	3.78002	3.91094	2.85432	2.91894	2.78919	3.23805	3.32189	3.33701	6.04731	6.00734	6.00307	3.69433	3.73146	3.73906	2.14007	1.92038	1.75292	3.57976	3.72474	3.72903
Retrotransposon	LTR	Gypsy	Gypsy	PtRLG_580_PIER	4.2675	4.20906	4.38281	1.9877	1.98492	2.15256	5.93	5.92081	5.93653	4.70202	4.891	4.93943	3.52782	3.59449	3.45037	4.24585	4.1898	4.2768	6.3891	6.40778	6.39127	4.58642	4.60773	4.58176	3.11292	3.46072	3.15324	4.21449	4.30906	4.22267
Retrotransposon	LTR	Gypsy	Gypsy	PtRLG_581_C_PIER	3.71919	3.81296	3.47015	4.89139	4.76404	4.94331	4.62111	4.60486	4.60111	4.05566	3.90481	3.98562	4.55609	4.52099	4.59169	4.71038	4.57749	4.61699	4.56162	4.59107	4.60155	4.99274	4.97622	5.0203	3.94338	4.08564	4.04866	4.7185	4.62355	4.70512
Retrotransposon	LTR	Gypsy	Gypsy	PtRLG_581_H_PIER	3.56986	3.35009	3.41265	3.55611	3.51781	3.54718	4.46283	4.46589	4.45466	3.69846	3.66592	3.64849	4.04818	4.04165	4.06935	4.9819	4.88719	4.88247	4.57624	4.56644	4.5922	5.25971	5.26467	5.3544	2.98719	2.74145	2.70088	4.44215	4.40218	4.47818
Retrotransposon	LTR	Gypsy	Gypsy	PtRLG_582_PIER	4.62214	4.69903	4.50453	3.49122	3.58223	3.60187	4.6522	4.64294	4.67725	4.30319	4.47282	4.44892	5.69562	5.77403	5.72783	5.87652	5.80944	5.71373	4.57767	4.57522	4.60309	6.06837	6.03986	6.06804	1.67398	1.77307	1.38629	5.91711	5.88404	5.93825
Retrotransposon	LTR	Gypsy	Gypsy	PtRLG_583_PIER	3.05487	3.09614	3.08695	5.09228	5.02088	4.99894	4.04957	4.06673	4.0725	4.77236	4.62519	4.5959	4.14291	4.1909	4.17286	4.7331	4.74516	4.74703	4.10913	4.07781	4.04679	4.70164	4.76504	4.68269	4.60886	4.82991	4.81148	5.24577	5.20038	5.1898
Retrotransposon	LTR	Gypsy	Gypsy	PtRLG_584_PIER	3.27549	3.13847	3.07797	1.43355	1.62397	1.83671	3.86038	3.79926	3.75149	3.87452	4.09518	4.11458	4.4344	4.49223	4.50073	5.0414	4.77042	4.92183	3.80225	3.84905	3.73677	5.02917	4.9586	5.08976	1.58412	1.56218	1.7492	3.15765	3.04898	3.25065
Retrotransposon	LTR	Gypsy	Gypsy	PtRLG_585_B_PIER	3.41699	3.29795	3.39115	4.15939	4.14402	4.11496	5.05735	5.02676	5.04771	4.31409	4.39437	4.36412	3.71974	3.77535	3.74847	4.27556	4.37535	4.27557	5.19421	5.20449	5.20533	4.26295	4.23341	4.29814	4.65835	4.55185	4.33073	4.47129	4.44209	4.41085
Retrotransposon	LTR	Gypsy	Gypsy	PtRLG_585_C_PIER	2.85811	2.89194	3.02562	3.94208	3.80541	3.70047	3.54047	3.56315	3.55532	3.33776	3.22967	3.33959	3.31455	3.47659	3.23669	3.52772	3.5125	3.49121	5.68246	5.66003	5.67225	3.42216	3.5079	3.50026	3.73652	3.63573	3.80042	3.79	3.83031	3.82797
Retrotransposon	LTR	Gypsy	Gypsy	PtRLG_585_PIER	3.38712	3.16042	3.37605	3.76387	3.64184	3.67019	4.41643	4.45416	4.47167	3.88115	3.74057	3.71659	3.95979	4.07738	4.03518	3.59592	3.67163	3.72441	5.31533	5.29221	5.28161	3.68723	3.67497	3.73995	4.32066	4.54794	4.43329	4.09902	4.14654	4.12453
Retrotransposon	LTR	Gypsy	Gypsy	PtRLG_588_PIER	2.34728	2.08889	2.26916	2.17563	1.95881	1.96226	4.59768	4.61761	4.60682	5.53577	5.63745	5.64386	4.27402	4.24127	4.25575	3.6859	3.80362	3.60775	4.53582	4.54739	4.4966	4.19086	4.23487	4.16269	0	0	0	2.66961	2.82046	2.77198
Retrotransposon	LTR	Gypsy	Gypsy	PtRLG_590_PIER	3.54921	3.39039	3.11618	1.40464	1.49664	1.60336	5.1634	5.15479	5.17384	4.75388	4.94139	4.94666	4.99775	5.12789	5.18246	4.98651	4.82316	4.8303	5.09746	5.09204	5.10021	4.9557	5.01195	5.08073	1.16315	1.35963	0.875469	3.96801	4.01302	4.03106
Retrotransposon	LTR	Gypsy	Gypsy	PtRLG_591_PIER	3.15959	2.80963	2.75716	2.08281	2.15488	2.04266	5.52015	5.49786	5.51528	5.22972	5.53626	5.51548	5.5747	5.50307	5.50101	4.107	4.03945	4.05188	5.67931	5.68448	5.70597	4.65556	4.793	4.64879	1.83258	0.693147	0.693147	3.62771	3.82148	3.6239
Retrotransposon	LTR	Gypsy	Gypsy	PtRLG_593_PIER	3.15396	3.181	3.07385	2.81241	3.17067	2.85503	4.47921	4.4182	4.46642	4.18356	4.36901	4.36389	5.63149	5.55435	5.69169	3.88163	3.92312	3.94799	4.45505	4.39071	4.45189	4.38838	4.26651	4.22344	2.0167	3.20791	2.2465	3.37336	3.25305	3.41859
Retrotransposon	LTR	Gypsy	Gypsy	PtRLG_594_PIER	3.34724	3.47953	3.46834	1.87514	2.36585	2.03688	3.50708	3.54932	3.52158	4.45341	4.9025	4.87238	5.35018	5.24446	5.34465	3.50076	3.36974	3.55106	3.63795	3.49029	3.5802	3.70637	3.7414	3.54505	1.34707	0.693147	1.12393	3.58514	3.61855	3.61782
Retrotransposon	LTR	Gypsy	Gypsy	PtRLG_595_PIER	4.97857	5.04604	5.02969	2.1347	1.62362	2.05645	3.47962	3.5388	3.53673	2.91317	3.01321	2.95565	4.56855	4.65844	4.52473	3.6187	3.70921	3.82505	3.27529	3.48494	3.31436	4.13682	3.97497	4.10818	0.693147	1.17865	1.0033	3.62187	3.61469	3.77351
Retrotransposon	LTR	Gypsy	Gypsy	PtRLG_596_PIER	2.66159431	2.824771933	2.921418126	2.69774394	3.07577652	2.959674952	3.727710668	3.747280429	3.759272678	2.126172444	2.417359162	2.584699193	3.429558055	3.441680119	3.496946859	3.567519404	3.554970847	3.56612125	3.486824468	3.482795802	3.465604644	3.56269529	3.67310824	3.865702589	5.149155887	5.365307567	5.189104998	3.989789278	3.912762732	3.874933619
Retrotransposon	LTR	Gypsy	Gypsy	PtRLG_597_PIER	4.73411	4.77068	4.74722	1.34462	1.54536	2.09186	4.75658	4.72197	4.71663	4.87168	5.04228	4.99463	3.03154	3.2755	3.07438	3.68615	3.60581	3.79632	4.59616	4.57851	4.62644	3.2936	3.26554	3.47426	1.17272	0	1.79176	2.70663	2.82066	2.58669
Retrotransposon	LTR	Gypsy	Gypsy	PtRLG_6_B_PIER	1.92075	1.89824	1.97792	1.59222	1.75163	1.81848	5.2514	5.27098	5.24964	6.41046	6.84507	6.82925	4.26336	4.25644	4.31307	5.51056	5.48677	5.46327	5.46227	5.4681	5.42546	5.84023	5.83869	5.83861	0.693147	0.693147	0	4.95802	4.99692	4.95811
Retrotransposon	LTR	Gypsy	Gypsy	PtRLG_6_PIER	0.693147	1.34707	0.693147	1.13498	1.58146	1.37902	4.57486	4.56287	4.54647	5.48838	5.78405	5.78582	3.89597	3.87549	3.86802	4.99461	4.93872	4.95808	4.79912	4.8041	4.81988	5.41117	5.40274	5.39816	0.693147	1.38629	1.29928	4.81454	4.78663	4.77203
Retrotransposon	LTR	Gypsy	Gypsy	PtRLG_601_PIER	4.19964	4.28465	4.24618	3.01339	3.18136	3.11581	4.30932	4.26203	4.27854	6.16118	6.28519	6.27602	3.7497	3.81368	3.8182	3.78993	3.58903	3.80182	3.95139	3.99492	3.9129	3.84628	3.92252	3.94446	2.50605	2.26931	2.59026	4.35449	4.28816	4.27517
Retrotransposon	LTR	Gypsy	Gypsy	PtRLG_602_PIER	3.39797	3.24779	3.60919	2.39334	1.92238	2.17888	3.97958	4.02459	3.94873	4.85534	5.0651	4.99061	5.32061	5.46262	5.40026	4.3113	4.21119	4.24867	4.3366	4.37229	4.35431	4.49168	4.4057	4.4349	0	0	0.693147	4.1395	4.02773	4.02426
Retrotransposon	LTR	Gypsy	Gypsy	PtRLG_603_PIER	2.87597	2.84647	2.92475	3.90197	3.73156	3.83369	4.57064	4.56555	4.56231	4.95621	5.41727	5.39906	6.03109	5.98408	5.93724	3.44938	3.51491	3.53924	4.73357	4.65967	4.6577	3.8147	3.81489	3.76653	0.693147	0	1.32176	3.89447	4.02361	3.9591
Retrotransposon	LTR	Gypsy	Gypsy	PtRLG_604_PIER	2.3619	2.33786	2.33786	2.13382	2.26375	2.24015	4.28966	4.30397	4.3707	5.77788	5.74695	5.75238	3.3218	3.47816	3.3892	5.0746	5.05329	5.03266	4.09793	4.08728	4.12547	5.90499	5.89394	5.93383	2.18979	2.83321	2.90508	2.88144	2.87092	2.86835
Retrotransposon	LTR	Gypsy	Gypsy	PtRLG_605_PIER	4.41933	4.42331	4.41443	3.56021	3.60061	3.55863	5.60542	5.61854	5.56981	6.00105	6.19215	6.21076	4.2317	4.23685	4.26404	4.1159	4.08066	4.17501	5.85491	5.84193	5.85745	4.02611	4.12641	4.05489	2.64175	2.2692	2.25479	4.53155	4.50396	4.57004
Retrotransposon	LTR	Gypsy	Gypsy	PtRLG_607_PIER	3.086902076	3.443618098	3.307168714	2.674148649	2.990161787	2.972120701	3.986310104	3.993075664	3.989879941	3.740658006	4.126224294	4.046485714	3.465351454	3.286870865	3.378859744	3.477871345	3.721958751	3.643110347	4.414860408	4.339520932	4.341722735	3.495479761	3.252836575	3.276997552	5.386786015	4.592591404	5.531411249	3.893696089	3.930880088	3.918841705
Retrotransposon	LTR	Gypsy	Gypsy	PtRLG_611_B_PIER	3.57132	3.44948	3.62776	2.50424	2.26069	2.35984	3.39226	3.37051	3.33573	3.14397	3.28591	3.16327	3.14059	3.34911	3.29911	4.85258	4.86018	4.80947	3.87132	3.80455	3.85567	5.22945	5.18311	5.17884	1.75786	1.56398	1.49165	2.445	2.51989	2.35996
Retrotransposon	LTR	Gypsy	Gypsy	PtRLG_612_PIER	2.16321	2.14879	2.02418	2.45047	2.19722	2.45788	5.27014	5.26442	5.29248	4.02635	4.13386	4.06442	4.66459	4.59032	4.68878	4.95943	5.00928	4.90823	4.76197	4.73689	4.75167	4.85271	4.89744	4.80044	3.4286	2.93763	3.00223	4.50281	4.50883	4.52275
Retrotransposon	LTR	Gypsy	Gypsy	PtRLG_614_PIER	1.229947521	1.098612289	1.216395324	2.558521048	2.337559302	2.527630834	3.536372007	3.530352546	3.661485133	2.811725297	3.032719726	2.889610357	2.4685147	2.652530444	2.625139496	2.295743744	2.495574545	2.318693651	5.616680184	5.560196898	5.618957796	2.378664264	2.50514219	2.43715095	1.098612289	1.098612289	1.326870737	2.403307871	2.326990835	2.393339456
Retrotransposon	LTR	Gypsy	Gypsy	PtRLG_618_PIER	2.42165	2.79107	2.96183	1.59393	1.23214	1.20896	4.68913	4.76128	4.7428	5.53748	5.80731	5.79413	5.71721	5.61621	5.70453	3.37076	3.38507	3.38477	4.69374	4.68522	4.67992	3.79184	3.72177	3.83272	0.693147	0.693147	0	5.25139	5.28451	5.29319
Retrotransposon	LTR	Gypsy	Gypsy	PtRLG_619_PIER	3.35404	3.35326	3.08928	3.7178	4.03138	4.19799	6.02408	6.02063	6.02106	4.30924	4.30982	4.32485	4.14006	4.15074	4.18338	4.16805	4.03119	4.12685	5.59622	5.60701	5.6361	4.2426	4.13843	4.23888	3.2581	3.09402	3.36153	3.94891	4.011	3.90945
Retrotransposon	LTR	Gypsy	Gypsy	PtRLG_623_PIER	3.63021	3.52069	3.67475	3.72319	3.72376	3.62222	4.58782	4.53771	4.57737	4.96163	5.11539	5.10759	3.73722	3.56763	3.61576	4.52443	4.5002	4.48076	4.47297	4.41432	4.45984	5.55277	5.59056	5.57086	2.19156	2.11581	2.00307	3.36301	3.42202	3.39568
Retrotransposon	LTR	Gypsy	Gypsy	PtRLG_624_PIER	4.65934	4.56911	4.63157	4.30993	4.37589	4.26639	3.81035	3.89432	3.8778	5.25375	5.45953	5.45682	5.12626	5.09949	5.13593	4.24152	4.2427	4.23118	3.71695	3.77589	3.74732	5.24573	5.25096	5.26125	1.90707	1.6864	2.12669	4.37027	4.44847	4.50468
Retrotransposon	LTR	Gypsy	Gypsy	PtRLG_626_PIER	4.09897	4.30249	4.19684	2.35116	2.37574	2.44949	4.81467	4.80194	4.8488	5.53618	5.85262	5.8042	3.64962	3.72651	3.68205	3.22762	3.06625	3.25986	5.06732	5.06974	5.05105	3.54383	3.51268	3.45553	3.03166	2.46001	2.67906	3.75219	3.81	3.71417
Retrotransposon	LTR	Gypsy	Gypsy	PtRLG_628_PIER	2.75669	2.82253	2.46278	4.598	4.59718	4.48467	3.54743	3.46727	3.57565	5.17125	5.02149	5.02506	3.07742	3.17649	3.11546	3.4549	3.31524	3.35364	3.39548	3.41246	3.35295	3.60061	3.61921	3.56225	3.56524	4.02535	3.53725	4.0783	4.07041	4.08916
Retrotransposon	LTR	Gypsy	Gypsy	PtRLG_631_PIER	2.25687513	1.871802177	1.945910149	1.626316662	1.785070481	1.47145319	4.829401146	4.830782687	4.825373419	3.623556625	3.804640447	3.765590464	3.792207406	3.694123182	3.813629276	3.298688352	3.432143571	3.40795119	5.039540161	5.066826574	5.121556321	3.333689122	3.400723936	3.364121833	1.609437912	1.540445755	1.4663363	2.413670192	2.474334292	2.433508087
Retrotransposon	LTR	Gypsy	Gypsy	PtRLG_632_PIER	3.62667	3.49779	3.6299	5.02428	5.05394	5.12476	4.7771	4.79152	4.76081	3.28619	3.41782	3.36879	3.54416	3.57871	3.52845	4.64926	4.63614	4.68083	3.42458	3.45438	3.52389	4.75919	4.74617	4.75183	3.86629	3.83976	3.792	4.42584	4.44247	4.3495
Retrotransposon	LTR	Gypsy	Gypsy	PtRLG_634_PIER	2.68894	2.70896	2.38634	1.64683	1.75715	2.23171	4.48052	4.44708	4.4993	5.18218	5.56573	5.52116	4.37539	4.36076	4.45558	3.94891	3.91906	3.81357	4.45548	4.47492	4.4743	4.19116	4.27593	4.20108	1.21444	1.07264	1.06784	4.65078	4.79148	4.71154
Retrotransposon	LTR	Gypsy	Gypsy	PtRLG_635_B_PIER	3.53537	3.17426	3.45896	3.4193	3.20572	3.44075	3.83426	3.77068	3.80978	3.15301	3.31607	3.33898	3.88853	3.85707	3.90928	5.46483	5.3651	5.39754	3.72263	3.69274	3.72083	5.73019	5.73729	5.73988	3.04154	2.71656	2.91515	3.05849	2.94907	2.91871
Retrotransposon	LTR	Gypsy	Gypsy	PtRLG_635_PIER	3.35968	3.11123	3.42609	4.54391	4.601	4.76177	3.2843	3.22903	3.29949	2.68519	2.82385	2.78143	4.42784	4.43843	4.43629	5.7648	5.71821	5.73244	3.17777	3.22319	3.14863	5.73864	5.71954	5.76733	4.00593	4.21705	4.02839	3.03401	3.09806	3.01242
Retrotransposon	LTR	Gypsy	Gypsy	PtRLG_636_PIER	2.77149	2.77753	2.7106	3.04167	3.14481	3.21456	4.69723	4.77157	4.76048	5.31744	5.57227	5.56921	3.15222	3.05005	3.04891	3.45127	3.54311	3.51412	4.67928	4.63389	4.674	3.68367	3.70255	3.79951	1.26369	1.50991	2.36231	3.47119	3.35337	3.32221
Retrotransposon	LTR	Gypsy	Gypsy	PtRLG_637_PIER	5.78713	5.74489	5.7126	2.91698	2.9871	2.93073	3.4517	3.41951	3.39289	4.43356	4.60912	4.57344	3.30142	3.15616	3.2581	5.24859	5.06746	5.12862	3.30359	3.21735	3.20277	5.39805	5.39647	5.4004	2.62025	2.59188	3.05022	4.71824	4.70917	4.76926
Retrotransposon	LTR	Gypsy	Gypsy	PtRLG_638_PIER	1.887069649	1.709522133	1.572396263	1.508511994	1.270462546	1.378196663	4.567103766	4.554171585	4.560821145	4.238128839	4.497391193	4.439251366	2.539631549	2.556599207	2.614962217	3.078988275	2.986429133	2.939759627	5.007965066	4.954332984	5.014660515	2.827260366	2.86508244	2.74748243	2.112964563	1.35812377	2.020944733	3.197149508	3.38240864	3.351099863
Retrotransposon	LTR	Gypsy	Gypsy	PtRLG_639_PIER	5.10828	5.21691	4.98875	2.45414	2.60396	2.5616	4.64203	4.58853	4.59697	3.85861	4.05098	4.05252	3.36499	3.21167	3.25374	3.88839	3.88438	3.95199	4.27158	4.24367	4.27894	4.17918	4.08665	4.11638	2.39208	2.5362	2.79998	3.9365	3.87206	3.87017
Retrotransposon	LTR	Gypsy	Gypsy	PtRLG_641_PIER	2.40968	2.22762	2.33336	3.5448	3.56752	3.53508	4.84016	4.8378	4.84828	3.97321	4.13506	4.068	3.18415	3.1827	3.22182	3.50745	3.5915	3.40493	3.1994	3.19699	3.24792	3.43734	3.41364	3.39813	4.98556	4.84987	5.02896	3.5552	3.52669	3.5673
Retrotransposon	LTR	Gypsy	Gypsy	PtRLG_643_D_PIER	4.99499	4.93724	4.9802	2.45341	2.28791	2.37725	5.66037	5.65066	5.67094	3.60278	3.58285	3.59714	3.03368	2.85799	3.19591	4.69349	4.75547	4.6868	5.66581	5.66075	5.66825	4.94214	4.9727	4.97877	2.20276	2.33537	1.75254	4.62071	4.69408	4.62861
Retrotransposon	LTR	Gypsy	Gypsy	PtRLG_643_PIER	5.55259	5.51048	5.60374	2.71196	2.76537	2.85993	5.46723	5.48228	5.4886	4.51621	4.35106	4.2925	3.5819	3.47352	3.39766	5.02433	4.87798	4.88676	5.53586	5.52873	5.53517	5.21366	5.25412	5.31763	2.9275	3.36834	2.75891	5.03636	5.21467	4.97541
Retrotransposon	LTR	Gypsy	Gypsy	PtRLG_645_B_PIER	2.50396	2.12456	2.32728	1.20397	1.11542	1.16761	4.69114	4.74706	4.76627	5.02993	5.26867	5.26836	3.33625	3.30162	3.42441	2.58541	2.5843	2.52072	4.74939	4.7655	4.75387	3.13859	3.14532	3.11129	1.29928	0.693147	1.79176	2.77381	2.94848	2.60583
Retrotransposon	LTR	Gypsy	Gypsy	PtRLG_645_PIER	3.61161	3.77355	3.57134	2.43458	2.57287	2.61436	5.49932	5.50192	5.512	5.69244	6.01907	5.95785	5.06437	4.82427	4.94547	3.92724	3.83101	3.77632	5.63572	5.54075	5.56229	4.17339	4.21865	4.16741	2.78719	3.49217	2.65398	4.49826	4.54718	4.5637
Retrotransposon	LTR	Gypsy	Gypsy	PtRLG_647_PIER	4.42069	4.42574	4.42252	2.72016	2.8145	3.15118	3.58007	3.59246	3.54225	4.13245	4.12267	4.14256	3.5976	3.68384	3.62486	4.2813	4.25559	4.37204	3.41875	3.31687	3.38887	5.26161	5.2449	5.21693	1.66255	1.82033	1.33977	3.93291	3.72274	3.95527
Retrotransposon	LTR	Gypsy	Gypsy	PtRLG_648_PIER	5.02456	4.71578	5.00588	3.97845	4.14329	3.81562	3.61197	3.53963	3.59859	4.02045	4.08577	4.16647	2.93283	3.00602	3.19318	3.57844	3.56167	3.59951	4.24211	4.17057	4.22634	4.28271	4.1976	4.22986	1.1417	1.83722	1.76026	2.13848	2.03655	1.86452
Retrotransposon	LTR	Gypsy	Gypsy	PtRLG_652_PIER	4.21045	4.05328	4.22211	2.44547	2.20984	2.23907	4.06853	4.10219	4.10266	4.44533	4.64647	4.6284	3.00795	2.93297	2.98916	4.70112	4.74599	4.72853	4.35946	4.3379	4.33319	4.93191	4.88106	4.98873	3.18183	3.08681	3.69232	5.21621	5.19942	5.15968
Retrotransposon	LTR	Gypsy	Gypsy	PtRLG_653_PIER	2.76098	2.41114	2.37907	3.16867	3.10472	3.2192	4.75391	4.74672	4.73551	4.63919	4.64254	4.59846	3.11352	3.08376	3.15353	3.66346	3.58155	3.49571	4.21042	4.21655	4.20194	3.74336	3.62509	3.73927	5.01477	4.38106	4.35414	3.27868	3.29225	3.23467
Retrotransposon	LTR	Gypsy	Gypsy	PtRLG_654_B_PIER	0	0.693147	0	0	1.116	1.12393	4.49867	4.45774	4.433	3.26968	3.96866	4.01556	0	0	0	1.79176	0.693147	0	5.22207	5.20053	5.19929	0	0	0.693147	0	0	0.693147	0	0	0
Retrotransposon	LTR	Gypsy	Gypsy	PtRLG_654_C_PIER	0	0	0	0.693147	0.693147	1.12393	4.6795	4.66366	4.64114	3.02355	2.9598	3.04898	0.693147	0	0	0	0	0	5.93936	5.88728	5.89422	0.693147	1.79176	1.38629	0	0	0	0	0	0
Retrotransposon	LTR	Gypsy	Gypsy	PtRLG_654_PIER	2.10647	2.29506	2.27615	3.35658	3.20721	3.35412	4.72894	4.74913	4.73178	3.93885	3.91395	3.92425	3.18701	3.26181	3.0838	3.7941	3.84359	3.80973	5.43073	5.45018	5.41692	3.96698	3.94588	3.98263	1.65717	1.6247	2.00747	4.30356	4.29295	4.23045
Retrotransposon	LTR	Gypsy	Gypsy	PtRLG_655_B_PIER	0	0	1.38629	0.693147	0	0.693147	4.62175	4.59745	4.63867	4.41326	5.00299	5.05474	3.62741	3.71169	3.89427	1.96822	2.35138	2.53492	4.19927	4.15272	4.15762	1.49165	1.92789	2.19067	0	0	0.693147	5.39493	5.45492	5.41335
Retrotransposon	LTR	Gypsy	Gypsy	PtRLG_655_C_PIER	3.42318	2.73003	3.27083	4.07088	3.74881	3.44307	4.45528	4.45747	4.43163	4.54986	4.79341	4.81352	3.93515	3.91014	3.89518	4.85477	4.8495	4.86716	3.97923	3.98816	3.98096	4.70239	4.77146	4.71641	1.73769	1.50408	1.40691	4.89683	5.05812	4.93073
Retrotransposon	LTR	Gypsy	Gypsy	PtRLG_655_D_PIER	3.03855	2.95869	2.07944	4.23299	4.26511	3.88792	4.34322	4.38084	4.33715	4.59117	4.92202	4.93469	4.29037	4.23097	4.34708	4.87228	4.79333	4.80016	5.02101	4.98574	5.02192	4.53751	4.50932	4.47984	2.43838	2.56946	2.59613	4.49123	4.39366	4.41816
Retrotransposon	LTR	Gypsy	Gypsy	PtRLG_655_E_PIER	0	0	0.693147	0	0	0	3.4369	3.47008	3.53738	5.32053	6.07243	6.06792	3.02852	2.8465	2.66113	2.69463	2.4108	2.86996	4.36995	4.37287	4.34438	2.58669	2.49364	2.73406	0.693147	0	0	2.43195	2.24543	2.08498
Retrotransposon	LTR	Gypsy	Gypsy	PtRLG_655_PIER	2.99573	1.90954	2.4449	2.30684	2.47293	2.59793	5.02541	5.02034	5.02922	4.52608	5.07339	5.06741	4.66973	4.62944	4.56152	4.83361	4.81301	4.84841	5.05674	5.04181	5.06635	4.69094	4.69728	4.66864	1.98707	2.31428	2.16645	5.11135	5.09932	5.14484
Retrotransposon	LTR	Gypsy	Gypsy	PtRLG_656_B_PIER	2.96613	2.95265	3.00105	2.82115	2.76254	2.75637	5.26881	5.28947	5.28088	4.15803	4.38829	4.30379	2.85071	3.00639	2.75674	3.24525	3.3102	3.254	4.50892	4.48584	4.48521	3.46434	3.45829	3.50471	1.91599	2.4956	2.96527	3.75567	3.67534	3.79897
Retrotransposon	LTR	Gypsy	Gypsy	PtRLG_656_C_PIER	2.45295	2.45788	2.43945	3.38479	3.50784	3.54477	5.12579	5.11723	5.14056	4.04549	3.98881	4.0163	2.78407	2.7128	2.87761	3.69249	3.68969	3.6032	4.76531	4.70535	4.70972	3.68888	3.72836	3.72912	3.79156	3.88967	3.8471	4.35969	4.36642	4.29965
Retrotransposon	LTR	Gypsy	Gypsy	PtRLG_656_PIER	3.18209	3.00633	3.02665	3.3418	3.50499	3.37661	5.60447	5.58916	5.59648	4.78181	4.85762	4.85125	3.53339	3.54929	3.6172	4.1756	4.14241	4.09901	5.13431	5.16445	5.14467	4.32649	4.29297	4.2463	4.43767	4.42391	4.76027	4.6575	4.66091	4.65532
Retrotransposon	LTR	Gypsy	Gypsy	PtRLG_657_C_PIER	2.6288	2.87027	3.03462	3.65533	3.31472	3.53848	5.46417	5.4586	5.49977	5.23259	5.18704	5.17344	3.1977	3.13948	3.10667	3.3732	3.29657	3.29221	5.32769	5.318	5.32092	3.41342	3.49037	3.48764	2.79418	2.62379	2.73771	4.20227	4.17534	4.18893
Retrotransposon	LTR	Gypsy	Gypsy	PtRLG_657_PIER	3.9233	3.86936	3.62403	3.09322	3.07245	3.46513	5.1611	5.17634	5.19407	5.16908	5.1456	5.12565	3.24326	3.24592	3.18511	3.28913	3.20229	3.32823	5.01572	5.00207	5.00726	3.26384	3.28744	3.37294	3.84417	3.56376	3.76034	3.94234	3.94056	3.94226
Retrotransposon	LTR	Gypsy	Gypsy	PtRLG_658_B_PIER	2.12945	2.00632	1.57144	3.1263	3.3167	3.19271	4.38442	4.39663	4.39347	4.9146	5.02072	5.01385	2.97808	3.0275	2.98881	3.32807	3.24561	3.17205	3.97447	4.02148	3.98142	3.50998	3.45797	3.53411	0.936768	1.36949	0.836247	3.49716	3.56808	3.55652
Retrotransposon	LTR	Gypsy	Gypsy	PtRLG_659_PIER	4.80025	4.8008	4.78105	3.05759	3.07337	2.92735	4.84645	4.80955	4.82089	6.01568	6.19947	6.18658	3.70844	3.5729	3.5647	5.44996	5.37324	5.44339	4.55269	4.50817	4.46951	5.87686	5.90175	5.81917	1.70869	1.70475	2.2705	3.53924	3.5971	3.69789
Retrotransposon	LTR	Gypsy	Gypsy	PtRLG_661_PIER	1.9404	1.52408	1.55585	3.63526	4.07532	4.1257	4.06349	4.0183	4.03592	4.95413	5.08504	5.09374	2.99252	3.10805	2.95833	3.79314	3.68095	3.65763	3.977	4.04325	4.04065	3.80986	3.87589	3.69606	3.22517	3.06339	2.91919	4.13914	4.01361	4.11087
Retrotransposon	LTR	Gypsy	Gypsy	PtRLG_663_B_PIER	4.12581	3.99955	3.98657	4.27866	4.21848	4.37778	5.04637	4.9916	5.04629	5.43707	5.68859	5.68673	5.14485	5.1219	5.10736	4.28511	4.30207	4.19012	4.91712	4.91411	4.9056	4.49511	4.61638	4.60197	1.96406	2.03181	2.23589	4.36425	4.36733	4.46043
Retrotransposon	LTR	Gypsy	Gypsy	PtRLG_663_PIER	5.23637	5.11406	5.19802	3.84393	3.83313	3.94892	5.21761	5.17947	5.24103	6.35493	6.68148	6.68455	4.82755	4.8218	4.93483	4.46983	4.45147	4.49678	5.04682	5.03206	5.02275	4.53161	4.52033	4.61592	2.64675	2.33866	2.26962	3.98298	3.95099	4.04399
Retrotransposon	LTR	Gypsy	Gypsy	PtRLG_667_B_PIER	1.94591	1.64148	2.07944	2.29075	3.11795	2.24724	3.63255	3.60751	3.56372	3.53723	3.62412	3.64048	5.4688	5.48352	5.37871	2.86836	2.86677	3.07249	3.778	3.78449	3.74137	3.40909	3.45899	3.25081	0.693147	0.693147	0.693147	4.43799	4.5628	4.3211
Retrotransposon	LTR	Gypsy	Gypsy	PtRLG_668_PIER	2.37749	2.23538	2.67798	1.83432	2.82477	1.21444	3.98148	4.03911	4.04129	4.32086	4.42771	4.50564	5.39243	5.29339	5.42014	4.40496	4.31334	4.2875	4.12665	4.14284	4.16048	4.58192	4.48436	4.58998	0	0	0	5.67034	5.70996	5.6637
Retrotransposon	LTR	Gypsy	Gypsy	PtRLG_669_PIER	2.47201	1.9306	2.1574	1.13346	1.86479	1.44036	5.16878	5.14675	5.16275	4.77231	4.93781	4.91189	4.62497	4.71209	4.67404	2.18452	2.00085	1.89712	5.06168	5.09141	5.08056	2.36155	2.58858	2.63425	0	0.693147	0.693147	3.45657	3.28674	3.18257
Retrotransposon	LTR	Gypsy	Gypsy	PtRLG_67_PIER	3.18887	2.76867	2.89037	3.42266	3.38439	3.47163	4.57692	4.60464	4.60547	4.90635	4.83155	4.78643	3.05046	2.99966	3.05503	5.4363	5.34808	5.30602	4.41448	4.46827	4.40261	5.25689	5.16208	5.23513	0.995427	0.693147	0.693147	2.98923	3.11732	3.21102
Retrotransposon	LTR	Gypsy	Gypsy	PtRLG_672_B_PIER	0	0	0	0	0	0	5.29778	5.25134	5.35945	0	0	0	0	0	0	0.693147	0	0	4.73745	4.72454	4.6509	0.693147	0.693147	0.693147	0	0	0	0	0	0
Retrotransposon	LTR	Gypsy	Gypsy	PtRLG_673_B_PIER	3.39196	3.556	3.53041	3.07128	2.77789	2.99438	5.39994	5.4011	5.37437	4.59509	5.21628	5.2033	5.28942	5.38624	5.40241	4.61774	4.38029	4.41477	5.65451	5.6348	5.63677	4.66966	4.65466	4.58927	0.693147	0.693147	0	5.23062	5.29808	5.2462
Retrotransposon	LTR	Gypsy	Gypsy	PtRLG_673_G_PIER	3.09104	3.35535	2.9915	3.41546	3.61023	3.20545	4.02891	3.99665	3.98583	4.08258	4.59314	4.54106	6.80951	6.74678	6.76344	2.95523	2.89523	2.95474	4.19571	4.16304	4.13983	3.19838	3.3502	3.34195	0.693147	0.693147	0	3.71507	3.94005	3.85721
Retrotransposon	LTR	Gypsy	Gypsy	PtRLG_673_PIER	3.7676	3.68344	3.67031	3.85785	3.83321	3.42058	5.57996	5.55601	5.57488	5.33635	5.78641	5.83397	5.75174	5.63699	5.75053	5.07537	4.98958	5.0056	5.82708	5.75853	5.79603	5.22416	5.27575	5.2424	1.87947	1.60944	1.92181	6.05985	6.00121	6.07274
Retrotransposon	LTR	Gypsy	Gypsy	PtRLG_674_PIER	2.73673	2.94029	2.84491	2.36967	2.54654	2.37682	4.11437	4.11383	4.13879	4.96312	4.98147	5.01167	3.81611	3.83218	3.87043	2.9517	2.87461	3.01665	3.95032	3.97674	3.96468	3.41064	3.4633	3.425	2.62536	2.63906	2.78075	2.2489	2.49159	2.34956
Retrotransposon	LTR	Gypsy	Gypsy	PtRLG_676_PIER	3.07605	3.10459	2.86312	1.35889	1.19032	1.02692	4.67699	4.66379	4.67077	4.9799	5.17739	5.1512	2.62041	2.86475	2.56495	3.39608	3.43816	3.4631	4.65722	4.64997	4.64419	4.17469	4.07262	4.04584	3.77276	3.67086	3.18989	4.32766	4.31633	4.33393
Retrotransposon	LTR	Gypsy	Gypsy	PtRLG_677_PIER	2.85902	2.9702	2.59237	2.32073	2.40184	2.4108	3.56258	3.51698	3.59348	5.67157	5.75003	5.77303	3.09845	3.07202	3.0839	3.34777	3.38674	3.22418	2.98954	3.08159	3.04347	3.31969	3.53188	3.44688	2.28335	2.17355	2.20338	3.02296	3.03605	3.04539
Retrotransposon	LTR	Gypsy	Gypsy	PtRLG_683_B_PIER	2.49994	2.31649	2.44068	2.96785	2.76377	2.5205	4.52567	4.48214	4.50461	4.87946	5.32062	5.32496	5.19949	5.11279	5.13819	3.69825	3.61927	3.70316	4.72477	4.69421	4.71487	3.96718	3.98947	3.87702	0	0.693147	0	4.36517	4.33796	4.5009
Retrotransposon	LTR	Gypsy	Gypsy	PtRLG_683_PIER	3.09726	2.89723	2.944	4.14903	4.21606	4.05486	4.53778	4.51717	4.51126	5.2475	5.74625	5.74615	6.1825	6.25566	6.19562	3.41925	3.41345	3.48312	4.71884	4.73866	4.68945	3.97278	3.98517	3.92686	1.88454	3.45789	2.99573	4.92431	4.96588	4.98361
Retrotransposon	LTR	Gypsy	Gypsy	PtRLG_684_B_PIER	3.46574	3.38701	3.46342	4.21696	4.2789	4.16161	5.16564	5.17163	5.1872	3.72278	3.51159	3.45722	3.53255	3.53025	3.61687	4.39009	4.3861	4.43321	5.67219	5.63818	5.60916	4.46028	4.62121	4.67183	2.54515	2.38818	2.97423	3.84155	3.68617	3.83883
Retrotransposon	LTR	Gypsy	Gypsy	PtRLG_684_PIER	3.25342	3.24314	3.05731	3.72296	3.75168	3.6189	4.87148	4.87396	4.89638	3.37232	3.23144	3.17929	3.47476	3.57044	3.55891	4.12791	4.1026	4.07446	5.42317	5.40438	5.417	4.09096	4.21454	4.28899	2.73725	2.67988	3.10906	4.01667	3.95421	4.04541
Retrotransposon	LTR	Gypsy	Gypsy	PtRLG_687_PIER	3.77788	3.83743	3.65868	1.95082	2.11626	2.18864	4.62728	4.68418	4.65256	5.61523	5.91413	5.90065	6.3091	6.34726	6.30049	4.46647	4.51581	4.45046	4.66167	4.62322	4.65531	4.85112	4.90109	4.93943	1.79176	1.31219	0.693147	4.56147	4.65814	4.56021
Retrotransposon	LTR	Gypsy	Gypsy	PtRLG_688_PIER	2.69881	2.3591	2.30776	0.693147	1.38629	0.949079	4.09614	4.09323	4.14426	4.74944	5.11653	5.12829	4.4882	4.35991	4.60012	3.39189	3.31565	3.2878	3.96831	4.02923	3.99584	3.53842	3.5821	3.43935	0	0.693147	2.07944	3.9851	4.12432	3.99836
Retrotransposon	LTR	Gypsy	Gypsy	PtRLG_691_PIER	0	0	0.693147	1.08705	2.07944	0.693147	3.72216	3.66848	3.61809	4.81624	4.92264	5.00124	4.48468	4.52622	4.52875	5.06914	4.99506	5.04552	4.60246	4.65272	4.59907	5.0255	5.01745	5.05668	0.693147	1.20397	0.693147	5.13683	5.05073	5.12171
Retrotransposon	LTR	Gypsy	Gypsy	PtRLG_694_C_PIER	2.82644	2.85647	2.57558	3.62781	3.62644	3.83329	4.17531	4.18041	4.19068	4.16963	4.21577	4.21432	2.90417	2.84913	2.98736	3.34374	3.2316	3.30296	5.02257	4.96873	4.98005	3.20633	3.27172	3.32072	1.65823	2.09448	2.07944	3.48095	3.45217	3.38109
Retrotransposon	LTR	Gypsy	Gypsy	PtRLG_694_E_PIER	1.06784	2.59739	2.21557	3.39563	3.63759	3.70658	3.91907	3.85717	3.85239	3.3488	3.41616	3.30179	3.34011	2.38774	3.44999	3.21611	3.28228	3.70842	5.39965	5.35628	5.38837	3.63552	3.36788	3.64171	2.42238	2.3557	2.05645	3.02042	3.2095	3.03389
Retrotransposon	LTR	Gypsy	Gypsy	PtRLG_694_PIER	2.76795	2.17096	2.44717	2.9866	2.86367	2.555	3.57352	3.5207	3.52674	4.5296	4.47689	4.42347	2.56553	2.41769	2.5251	3.51986	3.53854	3.55904	5.30834	5.30032	5.33619	3.84742	3.7237	3.81391	1.93199	1.70788	2.0003	3.10416	2.99873	3.05076
Retrotransposon	LTR	Gypsy	Gypsy	PtRLG_696_PIER	5.08696	5.08109	5.26952	2.32891	2.13044	2.70291	4.12754	4.14365	4.07103	3.66491	3.58161	3.58994	2.96906	2.81074	2.90142	4.75287	4.59604	4.43201	3.93533	4.01327	3.99648	5.05612	4.93044	4.82682	0	0	0	3.47218	3.43756	3.56445
Retrotransposon	LTR	Gypsy	Gypsy	PtRLG_697_B_PIER	0	0	0	0.693147	0	0	4.56767	4.4409	4.51398	6.03063	6.11838	6.12352	0	0	0	0	0	0	4.34326	4.44123	4.37942	0	0	0	0	0	0	0	0	0
Retrotransposon	LTR	Gypsy	Gypsy	PtRLG_697_PIER	0	0.693147	0.693147	2.68558	2.07944	3.42318	4.16263	4.18553	4.13601	5.64147	5.85149	5.84328	3.05564	2.98284	3.10316	4.81248	4.77982	4.87971	4.04929	4.03494	3.99279	4.61488	4.67786	4.64849	0	0.693147	0	4.29033	4.14615	4.20337
Retrotransposon	LTR	Gypsy	Gypsy	PtRLG_7_B_PIER	1.098612289	0	0	1.098612289	1.098612289	1.098612289	4.087321626	4.145300633	4.200627652	3.157132327	3.0807763	3.010921334	2.132581754	2.117975721	2.156999627	2.018072659	2.000944722	2.237107464	5.944464654	5.816557435	5.932380457	2.36124732	2.038730218	2.342215338	0	0	0	1.92368645	1.73625733	1.723969445
Retrotransposon	LTR	Gypsy	Gypsy	PtRLG_7_PIER	0.693147	1.17272	1.04145	1.30495	1.1421	1.17272	5.69259	5.72093	5.7479	4.78835	4.94221	4.89178	6.61733	6.55106	6.80813	2.57441	2.30483	2.64642	6.43254	6.40694	6.43427	2.62089	2.59461	2.61337	0.693147	0.693147	0.693147	2.32456	2.54912	2.71778
Retrotransposon	LTR	Gypsy	Gypsy	PtRLG_70_PIER	5.60007	5.57212	5.50169	2.97174	3.03328	3.17318	3.79912	3.73108	3.8462	5.78693	5.93153	5.9249	4.33512	4.24996	4.32748	5.16934	5.19268	5.19892	3.59835	3.60676	3.61301	5.54112	5.50155	5.51164	3.52972	3.26903	3.80019	4.75172	4.72322	4.7419
Retrotransposon	LTR	Gypsy	Gypsy	PtRLG_701_B_PIER	5.00395	4.98325	4.97813	2.61374	2.43822	2.24927	3.9467	3.92161	3.94958	4.02841	4.11824	4.03171	2.86537	2.92077	2.89896	4.63008	4.75381	4.75611	3.88136	3.75361	3.88713	5.12927	4.98184	4.96794	1.4604	1.54592	1.6864	3.94875	3.81604	3.99441
Retrotransposon	LTR	Gypsy	Gypsy	PtRLG_701_PIER	5.64301	5.69652	5.72605	3.47899	3.40329	3.73054	5.31056	5.30491	5.31725	4.95102	5.12517	5.06637	3.62542	3.62304	3.51959	5.27902	5.15781	5.24657	4.99647	4.98452	4.99698	5.38253	5.42494	5.38405	2.6893	2.88745	2.69254	4.34784	4.33733	4.33449
Retrotransposon	LTR	Gypsy	Gypsy	PtRLG_702_B_PIER	3.8486	3.92844	3.68954	4.41247	4.15783	4.45861	6.07956	6.05475	6.06486	3.07449	2.94624	3.00114	3.8054	3.81241	3.82665	3.81067	3.79527	3.80677	5.77474	5.75007	5.76571	3.94827	3.86165	3.90208	2.92943	2.6195	3.40409	3.56397	3.59295	3.61105
Retrotransposon	LTR	Gypsy	Gypsy	PtRLG_702_PIER	4.37855	4.23728	3.87566	4.39245	4.12644	4.52179	6.19165	6.16775	6.16827	2.96725	2.80182	2.90799	3.81908	3.76043	3.75564	3.72966	3.8172	3.7984	5.91951	5.89124	5.92646	3.77035	3.6609	3.70391	1.37287	1.64866	1.28866	3.65572	3.75276	3.73163
Retrotransposon	LTR	Gypsy	Gypsy	PtRLG_703_B_PIER	4.54529	4.48516	4.52697	2.28011	2.14975	2.24156	3.8979	3.80913	3.8423	3.82965	3.94586	3.98099	2.76772	2.50583	2.58217	5.04035	4.92417	5.04087	3.65582	3.62324	3.61631	5.16872	5.13203	5.15113	3.02706	2.71635	2.63355	4.38225	4.26102	4.33258
Retrotransposon	LTR	Gypsy	Gypsy	PtRLG_703_D_PIER	5.0742	5.00118	5.0698	3.26702	3.36005	3.07269	3.96639	3.90649	3.93532	3.72162	3.79517	3.794	3.1202	3.33152	3.63445	4.33151	4.39826	4.40802	3.80758	3.78446	3.8168	4.71147	4.54879	4.60238	3.50856	2.93857	3.94107	3.50037	3.52859	3.5691
Retrotransposon	LTR	Gypsy	Gypsy	PtRLG_703_PIER	4.30644	4.34847	4.36728	2.4916	2.57639	2.5214	5.87218	5.90732	5.88312	5.38063	5.60489	5.62447	3.45118	3.52761	3.34062	5.54553	5.49652	5.49441	5.82972	5.82283	5.80631	5.58559	5.61306	5.65748	2.78544	3.14548	2.68051	4.54228	4.50471	4.35097
Retrotransposon	LTR	Gypsy	Gypsy	PtRLG_704_B_PIER	0	0	0	0	0	1.25276	5.2706	5.23594	5.2891	0.693147	1.09861	0.693147	0	0	0	0	0	0	4.99257	5.01817	5.04939	0.693147	0	0.693147	0	0.693147	0	0	0	0
Retrotransposon	LTR	Gypsy	Gypsy	PtRLG_704_PIER	2.59856	2.42185	1.91692	1.68176	1.81238	1.36828	4.58053	4.612	4.63055	3.75792	3.91445	4.04574	5.49217	5.50229	5.48596	2.47182	2.56378	2.55529	4.40939	4.46742	4.46298	2.98722	3.22013	2.99634	0.693147	1.79176	0.693147	3.7921	3.73663	3.74081
Retrotransposon	LTR	Gypsy	Gypsy	PtRLG_705_PIER	1.23214	0.99853	1.61892	1.3196	1.39937	1.72277	4.45458	4.49059	4.48352	7.18139	7.51603	7.50444	4.42917	4.33852	4.18766	3.05369	3.15289	3.05136	4.08395	4.11607	4.12011	4.12849	4.27569	4.12782	0	0	0	3.18644	3.24166	3.21911
Retrotransposon	LTR	Gypsy	Gypsy	PtRLG_707_PIER	4.97011	5.03268	5.02639	4.58792	4.57633	4.57225	4.90762	4.92287	4.92665	4.84538	4.98253	4.98011	4.90492	4.86092	4.87925	4.94688	4.92153	4.94896	4.9928	4.98829	4.99968	5.73727	5.72128	5.7466	1.55181	1.96527	1.84764	4.33828	4.33639	4.42113
Retrotransposon	LTR	Gypsy	Gypsy	PtRLG_708_B_PIER	2.65962	2.60864	2.8283	2.70464	3.13118	3.02697	6.21978	6.19209	6.20835	5.13586	5.50668	5.52223	3.44064	3.51453	3.50405	5.54325	5.43411	5.45387	7.68838	7.69703	7.67337	5.91583	5.94871	5.95837	1.81708	1.65658	2.65676	3.01957	2.99045	3.06473
[truncated: 6,307 more rows]
