# Supplementary material for: Comparative Genomics Analysis of Repetitive Elements in Ten Gymnosperm Species: “Dark Repeatome” and Its Abundance in Conifer and Gnetum Species
Source: Life (Basel). 2021 Nov 15;11(11):1234. doi: 10.3390/life11111234 (PMC8620675; doi:10.3390/life11111234)
Supplement: Supplementary file 1 [file life-11-01234-s001.zip › Table_S3_Abundance_matrix_of_cpDNA-kChains.txt]

Table S3. Abundance matrix of cpDNA-kChains across 30 samples of conifers
RE_Name_Database_Name	Juniperus_communis	Juniperus_communis	Juniperus_communis	Taxus_baccata	Taxus_baccata	Taxus_baccata	Pinus_sylvestris	Pinus_sylvestris	Pinus_sylvestris	Pinus_sibirica	Pinus_sibirica	Pinus_sibirica	Larix_sibirica	Larix_sibirica	Larix_sibirica	Picea_glauca	Picea_glauca	Picea_glauca	Pinus_taeda	Pinus_taeda	Pinus_taeda	Picea_abies	Picea_abies	Picea_abies	Gnetum_gnemon	Gnetum_gnemon	Gnetum_gnemon	Abies_sibirica	Abies_sibirica	Abies_sibirica
KchainBiClust_4133_2_ClustSize_3_seq0_06_Picea_1_not_mapped__Kchain	6.82015	6.8563	6.81071	3.99942	4.03567	4.00855	4.63973	4.51369	4.44833	4.6082	4.86986	4.88944	4.81857	4.81784	4.72846	7.29777	7.23858	7.29076	5.14622	5.19729	5.14568	8.3242	8.31828	8.32375	0	0.693147	0	4.17679	3.99316	3.99391
KchainBiClust_438_1_ClustSize_3_seq0_06_Picea_1_not_mapped__Kchain	2.56495	1.93393	1.38629	0	0	1.01857	6.65146	6.64588	6.64004	6.59325	6.68563	6.68807	3.55614	3.38872	3.14904	7.55175	7.49902	7.56453	5.92426	5.94877	5.90043	8.31291	8.30139	8.31353	0	0	0	3.84939	3.92656	3.9932
KchainBiClust_7767_0_ClustSize_2149_seq0_01_Junip_1_not_mapped__Kchain	6.13231	6.10018	6.02707	0.693147	0	0.587787	6.88063	6.90333	6.85392	6.87857	7.31098	7.2796	4.78159	5.02774	5.0122	5.12326	5.10559	5.1127	6.849	6.84143	6.81532	6.2837	6.30574	6.31269	0	0	0	4.71111	4.69026	4.71534
KchainBiClust_614_1_ClustSize_3381_seq0_01_Junip_1_not_mapped__Kchain	0	0	0	0	1.06784	0	7.25738	7.2384	7.23778	6.54746	6.56826	6.59314	3.55153	3.67207	3.88773	6.05553	6.03436	6.03851	7.64728	7.57493	7.57702	7.36581	7.39466	7.34536	0	0	0	2.90872	3.22949	2.81341
KchainBiClust_938_0_ClustSize_3_seq0_06_Picea_1_not_mapped__Kchain	5.45651	5.4053	5.40102	5.20243	5.28349	5.26771	5.133	5.16862	5.08303	6.41039	6.80349	6.763	5.89092	5.85672	5.80681	5.39281	5.36544	5.24166	5.19723	5.20563	5.18931	5.97273	6.02456	6.05548	0	0	0	5.16974	5.19958	5.22513
KchainBiClust_2864_1_ClustSize_3_seq0_06_Picea_1_not_mapped__Kchain	0	0	0	3.01694	3.27174	3.08801	4.32426	4.20652	4.25377	3.56514	4.07196	3.84945	3.54042	3.43692	3.52418	7.33066	7.30548	7.31488	3.68009	3.73529	3.86411	7.4993	7.49682	7.48733	0.916291	0	0.916291	4.91279	5.03245	4.83773
KchainBiClust_2285_0_ClustSize_3_seq0_03_Pinus_3_not_mapped__Kchain	0	0	0	0	0	0	6.41467	6.44944	6.00666	5.05707	5.31197	5.25793	4.04568	4.10182	3.96935	3.53125	3.3157	3.56365	6.6492	6.47133	6.56459	4.40244	4.29865	4.41098	0	0	0	2.23001	1.57735	2.60852
KchainBiClust_2864_0_ClustSize_3_seq0_06_Picea_1_not_mapped__Kchain	1.2771	1.50408	1.39551	0	0	0	2.79131	3.35755	3.21135	1.62876	1.86698	2.00843	7.03454	7.02736	7.01949	7.98192	7.91736	7.9426	2.81585	2.86496	2.60179	8.76706	8.77476	8.75674	0.693147	0	0	6.57699	6.65057	6.57432
KchainBiClust_6975_1_ClustSize_3_seq0_06_Picea_1_not_mapped__Kchain	0	0	0	0	0.693147	0	4.21951	4.29729	4.10335	3.49022	3.6048	3.86073	3.42386	3.4208	3.18074	7.7639	7.68073	7.71687	4.66613	4.75682	4.68322	7.7266	7.73483	7.70574	0	0	0	6.89353	6.84223	6.78026
KchainBiClust_1382_0_ClustSize_2179_seq0_01_Junip_1_not_mapped__Kchain	0	0	0	0	0	0	7.00661	7.0282	7.01987	6.27064	7.00678	6.93316	0	0	0	0	0	0	7.5438	7.53262	7.5144	0	0	0	0	0	0	0	0	0
KchainBiClust_3640_1_ClustSize_315_seq0_03_Pinus_1_not_mapped__Kchain	0	0	0	0	0	0	6.7172	6.79744	6.69882	6.24622	7.07299	7.02287	0	0	0	0	0	0	6.67722	6.70339	6.64653	1.41707	0.632521	0.890973	0	0	0	0	0	0
KchainBiClust_563_0_ClustSize_13_seq0_03_Pinus_1_not_mapped__Kchain	0	0	0	0	0	0	6.62247	6.64556	6.63616	6.36351	6.4774	6.4051	0	0	0	0	0	0	6.48158	6.46639	6.39413	0	0	0	0	0	0	0	0	0
KchainBiClust_696_0_ClustSize_3_seq0_07_Pine_1_not_mapped__Kchain	0	0	0	0	0	0.641854	6.86974	6.88528	6.23338	5.46954	6.31817	6.47535	0	0	0	0	0	0	6.11115	6.84028	6.64438	0	0	0	0	0	0	0	0	0
KchainBiClust_220_0_ClustSize_1174_seq0_01_Junip_1_not_mapped__Kchain	0	0	0	0	0	0	4.71253	4.57356	4.7025	6.55219	7.62408	7.59845	0	0	0	0	0	0	4.57471	4.62715	4.49734	1.38629	1.38629	1.09861	0	0	0	0	0	0
KchainBiClust_13049_0_ClustSize_20_seq0_02_Taxus_3_not_mapped__Kchain	7.79663	7.84161	7.73268	7.29397	7.32686	7.36581	6.29895	6.18559	6.11589	5.21112	6.67001	6.76907	6.62923	6.64911	6.71417	4.87825	4.92362	5.13815	5.8605	5.62546	5.79271	6.99302	6.9954	6.87047	6.39158	6.3663	6.30955	6.59373	6.59769	6.54693
KchainBiClust_4133_1_ClustSize_3_seq0_06_Picea_1_not_mapped__Kchain	3.81944	3.7297	3.50556	1.28785	1.73234	2.19722	3.88427	3.78896	3.84341	4.39136	4.58389	4.02073	2.9303	2.97124	2.76841	6.14902	6.1455	6.12433	3.68624	3.74765	3.47661	7.06584	7.03723	7.0766	1.76359	2.15722	2.24469	3.3343	2.9598	3.40901
KchainBiClust_419_2_ClustSize_3_seq0_06_Picea_1_not_mapped__Kchain	0	0	0	0.693147	0	0	6.91761	6.9312	6.91436	6.65956	7.21741	7.21774	3.51453	3.78191	3.65066	4.44759	4.49167	4.60488	6.52861	6.51589	6.54867	5.60269	5.59414	5.58677	0	0.42286	0	0	0	0
KchainBiClust_419_0_ClustSize_3_seq0_06_Picea_1_not_mapped__Kchain	0	0	0.962812	0.369748	0.95784	1.22503	8.87489	8.85371	8.81589	7.92514	8.43405	8.37272	4.70564	4.64834	4.66949	6.75534	6.70632	6.68741	8.95562	9.09599	8.85084	6.81634	6.80817	6.8404	0.260285	0	0.709675	0	0	0
KchainBiClust_2144_0_ClustSize_2191_seq0_03_Pinus_1_not_mapped__Kchain	0	0	0	0	0	0	0	0	0	0.693147	0	0.641854	4.08261	4.2649	4.21951	8.13606	8.09196	8.07767	0	1.02165	0.641854	9.22716	9.23156	9.22198	0	0	0	7.17603	7.1383	7.13614
KchainBiClust_1056_0_ClustSize_5603_seq0_01_Junip_1_not_mapped__Kchain	1.4816	1.09861	2.56495	0	0	0	0	0	0	0	0	0	0	0	0	0	0	0	0	0	0	0	0	0	8.42323	8.38845	8.39981	0	0	0
KchainBiClust_1297_0_ClustSize_23_seq0_06_Picea_1_not_mapped__Kchain	0	0	0	0	0	0	0	0	0	0	0	0	0	0	0	9.18244	9.13813	9.15938	0	0	0	8.79999	8.7849	8.78235	0	0	0	0	0	0
KchainBiClust_1297_4_ClustSize_23_seq0_06_Picea_1_not_mapped__Kchain	0	0	0	0	0	0	0	0	0	0	0	0	0	0	0	10.5423	10.505	10.5265	0	0	0	10.1213	10.119	10.0663	0	0	0	0	0	0
KchainBiClust_2264_2_ClustSize_7348_seq0_01_Junip_1_not_mapped__Kchain	1.09861	0	0	0	0	0	0	0	0	0	0	0	0	0	0	0	0	0	0	0	0	0	0	0	6.98529	6.97203	6.935	0	0	0
KchainBiClust_14731_0_ClustSize_1148_seq0_01_Junip_1_not_mapped__Kchain	0	0	0	0	0	0	0	0	0	0	0	0	0	0	0	0	0	0	0	0	0	0	0	0	6.69084	6.77155	6.72637	0	0	0
KchainBiClust_2277_0_ClustSize_1691_seq0_01_Junip_1_not_mapped__Kchain	0	0	0	0	0	0	2.62637	2.51568	2.80158	5.04153	6.64501	6.60943	0	0	0	7.4847	7.50853	7.43266	2.55042	2.62557	2.57515	6.71367	6.73312	6.70521	0	0	0	0	0	0
KchainBiClust_16669_0_ClustSize_1264_seq0_01_Junip_1_not_mapped__Kchain	0	0	0	0	0	0	0	0	0	6.93882	7.66281	7.60376	0	0	0	0	0	0	0	0	0	0	0	0	0	0	0	0	0	0
KchainBiClust_3617_0_ClustSize_428_seq0_01_Junip_1_not_mapped__Kchain	0	0	0	0	0	0	0	0	0	0	0	0	8.87599	8.87654	8.89409	0	0	0	0	0	0	0	0	0	0	0	0	0	0	0
KchainBiClust_246_1_ClustSize_3_seq0_06_Picea_1_not_mapped__Kchain	0	0	0	0	0	0	0	0	0	0	0	0	0	0	0	7.08652	7.03827	7.04785	0	0	0	7.41758	7.43645	7.4044	0	0	0	0	0	0
KchainBiClust_2600_4_ClustSize_1660_seq0_01_Junip_1_not_mapped__Kchain	0	0	0	0	0	0	0	0	0	0	0	0	0	0	0	5.95972	5.80626	5.81971	0	0	0	6.48597	6.46166	6.51175	0	0	0	0	0	0
KchainBiClust_6027_2_ClustSize_3_seq0_03_Pinus_1_not_mapped__Kchain	0	0	0	0	0	0	7.42095	7.44435	7.3964	0	0	0	0	0	0	0	0	0	0	0	0	0	0	0	0	0	0	0	0	0
KchainBiClust_2600_0_ClustSize_1660_seq0_01_Junip_1_not_mapped__Kchain	0	0	0	0	0	0	0	0	0	0	0	0	0	0	0	7.25064	7.27958	7.21992	0	0	0	8.29043	8.28178	8.26405	0	0	0	1.25276	1.03609	1.25276
KchainBiClust_2285_1_ClustSize_3_seq0_03_Pinus_3_not_mapped__Kchain	0.805627	0	0	0	0	0	0	0	0	0	0	0	0	0	0	0	0	0	0	0	0	0	0	0	7.29491	7.26142	7.22633	0	0	0
KchainBiClust_2745_0_ClustSize_440_seq0_01_Junip_1_not_mapped__Kchain	0	0	0	0	0	0	0	0	0	0	0	0	7.54255	7.55752	7.5665	0	0	0	0	0	0	0	0	0	0	0	0	0	0	0
KchainBiClust_3648_0_ClustSize_17_seq0_10_Abies_1_not_mapped__Kchain	0	0	0	0	0	0	0	0	0	0	0	0	0	0	0	0	0	0	0	0	0	0	0	0	0	0	0	7.86816	7.89443	7.83653
KchainBiClust_3758_2_ClustSize_1981_seq0_01_Junip_1_not_mapped__Kchain	0	0	0	0	0	0	7.45872	7.44847	7.45752	0	0	0	0	0	0	0	0	0	0.693147	1.52939	1.07044	0	0	0	0	0	0	0	0	0
KchainBiClust_4529_2_ClustSize_3_seq0_06_Picea_2_not_mapped__Kchain	0	0	0	0	0	0	0	0	0	0	0	0	0	0	0	6.14098	6.15151	6.12898	0	0	0	6.57804	6.57909	6.58091	0	0	0	0	0	0
KchainBiClust_3648_1_ClustSize_17_seq0_10_Abies_1_not_mapped__Kchain	0	0	0	0	0	0	0	0	0	0	0	0	0	0	0	0	0	0	0	0	0	0	0	0	0	0	0	7.72796	7.69848	7.74972
100070_bclustnum_163_kamer_1_number_1	6.916050776	6.453974544	6.95113081	2.501435952	2.944438979	2.833213344	1.76766143	1.098612289	0	0	0	0	1.098612289	0	1.098612289	0	1.098612289	1.098612289	1.098612289	0	1.098612289	0	1.098612289	0	0	0	0	0	0	0
100135_bclustnum_51_kamer_1_number_1	4.734943275	4.24563401	4.747415998	0	0	0	1.098612289	0	0	1.791759469	0	0	0	0	0	0	1.098612289	0	0	0	0	0	0	0	6.873577827	6.947744927	6.858354929	0	0	0
10030_bclustnum_3031_kamer_1_number_1	0	0	0	0	0	0	5.298772263	5.275790532	5.50348023	6.385194399	7.031016615	7.087874412	3.433987204	3.761200116	3.488902962	0	1.386294361	1.446918983	4.989295887	5.538644432	5.217649463	0	1.609437912	1.386294361	0	0	0	1.845826164	2.024381953	1.098612289
100625_bclustnum_131_kamer_1_number_1	0	0	1.098612289	6.6069623	6.638063735	6.629159798	0	0	0	1.098612289	1.098612289	0	0	1.493926046	1.098612289	0	0	0	0	1.098612289	0	0	0	0	0	0	0	0	0	0
10064_bclustnum_766_kamer_1_number_1	6.565393131	6.586673598	6.595407494	0	0	0	0	0	0	0	0	0	0	0	0	0	0	0	0	0	0	0	0	0	0	0	0	0	0	0
100720_bclustnum_15_kamer_1_number_1	6.456769656	6.544390868	6.514712691	0	0	0	0	0	0	0	0	0	0	0	0	0	0	0	0	0	0	0	0	0	0	0	0	0	0	0
1007_bclustnum_7033_kamer_1_number_1	0	0	1.098612289	0	0	0	0	0	0	2.833213344	0	0	0	0	0	0	0	0	0	0	0	0	0	0	6.505452166	6.366814031	6.432296799	0	0	0
100953_bclustnum_20_kamer_1_number_1	7.033506484	6.392526643	7.039072973	0	0	0	0	0	0	0	0	0	0	0	0	0	0	0	0	0	0	0	0	0	0	0	0	0	0	0
10111_bclustnum_362_kamer_1_number_1	0	0	0	0	1.098612289	0	0	0	0	6.384068977	6.591281337	6.6327538	1.945910149	2.397895273	1.871802177	2.751537441	3.07577652	2.197224577	0	0	0	2.751537441	2.397895273	2.533696814	0	0	0	0	0	0
10111_bclustnum_7425_kamer_1_number_1	3.531251486	2.917770732	3.601042282	6.745432801	6.703801422	6.678552155	0	0	0	0	0	0	0	0	0	0	0	0	0	0	0	0	0	0	0	0	0	0	0	0
101201_bclustnum_230_kamer_1_number_1	0	0	0	0	0	0	1.85629799	1.098612289	1.098612289	5.556828062	6.512141982	6.487481563	0	0	0	0	0	0	0	1.098612289	0	0	1.098612289	0	0	0	0	0	0	0
101259_bclustnum_381_kamer_1_number_1	0	0	0	1.098612289	1.098612289	0	2.126399075	0	1.496643165	5.882667578	6.533580967	6.388561406	5.338225343	5.20273665	5.153291594	4.766191495	4.59511985	4.550547144	1.630271381	2.515144833	2.523622428	5.056245805	5.019925341	5.143223742	1.098612289	1.098612289	0	4.222896076	3.811329361	4.149463861
101276_bclustnum_201_kamer_1_number_1	0	0	0	6.630829813	6.561344619	6.582486251	0	0	0	0	0	0	0	0	0	0	0	0	0	0	0	0	0	0	0	0	0	0	0	0
101398_bclustnum_352_kamer_1_number_1	1.098612289	0	1.098612289	0	0	0	0	0	0	0	0	0	0	0	0	0	0	0	0	0	0	0	0	0	6.647688374	6.575772948	6.634633358	1.533929576	0	0
1015_bclustnum_3317_kamer_1_number_1	6.475432717	6.465256305	6.526913513	5.549076085	5.401176256	5.347788251	0	0	1.098612289	0	0	0	0	0	0	0	0	0	0	0	0	1.609437912	0	0	0	1.098612289	0	1.386294361	0	1.386294361
101695_bclustnum_46_kamer_1_number_1	0	0	0	0	0	0	4.385146762	4.131158535	4.433788569	6.978418754	7.547633531	7.544464374	5.303304908	5.421556601	5.399555396	1.609437912	1.098612289	1.098612289	4.605170186	4.702750514	4.751432693	2.197224577	2.76361735	1.887069649	0	0	0	4.127134385	4.166665224	4.131158535
101728_bclustnum_148_kamer_1_number_1	0	0	0	0	0	0	5.110595253	5.052320916	5.060155351	6.517671273	6.880542343	6.808275217	1.098612289	0	0	0	0	0	4.365545311	4.542476362	4.400130516	1.845826164	0	0	0	0	0	0	0	0
101900_bclustnum_6_kamer_1_number_1	0	0	0	0	1.098612289	0	1.098612289	0	0	0	0	0	0	0	0	0	0	0	1.098612289	0	0	0	0	0	6.635684054	6.526201991	6.563855527	0	0	0
101928_bclustnum_55_kamer_1_number_1	0	0	0	3.349904087	4.016383021	3.562465529	5.070161273	5.039546638	5.092522454	6.853874429	6.850549805	6.786265381	5.790571605	5.816515745	5.926926026	1.098612289	1.299283893	0	4.99314998	4.960043508	5.065123479	2.063693185	1.673975809	1.34117408	0	1.098612289	0	4.978112102	4.737951297	4.603168183
102481_bclustnum_386_kamer_1_number_1	0	0	0	7.141015484	7.121599727	7.15137574	0	0	0	0	0	0	0	0	0	0	0	0	0	0	0	0	0	0	0	0	0	0	0	0
102744_bclustnum_231_kamer_1_number_1	6.608900355	6.560402463	6.546148192	1.178654996	1.098612289	0	0	0	1.098612289	2.34703729	1.098612289	0	0	0	0	0	0	0	0	0	0	0	0	0	0	0	0	0	1.550598322	0
102911_bclustnum_54_kamer_1_number_1	0	0	0	6.427182391	6.591216838	6.435080886	0	0	0	1.098612289	0	0	0	0	0	0	0	0	0	0	0	0	0	0	0	0	0	1.098612289	0	0
103038_bclustnum_82_kamer_1_number_1	0	0	0	0	0	0	5.45275372	5.372496765	5.283878628	6.410285073	6.808818531	6.732210706	1.609437912	0	1.335001067	1.580449787	1.540445755	1.568615918	5.976858395	5.93047439	5.909351155	1.907069821	2.2633639	1.36687706	0	0	0	0	1.272966076	0
103088_bclustnum_342_kamer_1_number_1	0	0	0	0	1.098612289	0	4.640257368	4.366278278	4.609447027	0	1.446918983	1.098612289	4.198037689	4.118132701	3.831053702	6.80768961	6.819895178	6.6713289	1.386294361	1.098612289	1.558144618	6.899611206	6.9566502	6.884713852	0	0	0	1.335001067	1.098612289	1.098612289
103239_bclustnum_5_kamer_1_number_1	6.530989866	6.420371079	6.538362664	0	0	0	0	0	0	0	0	0	0	0	0	0	0	0	0	0	0	0	0	0	0	0	0	0	0	0
103835_bclustnum_220_kamer_1_number_1	0	0	0	0	0	0	3.205454156	2.734367509	3.120896887	6.578788605	6.633130258	6.703596619	2.367123927	2.944438979	2.852629507	0	0	0	2.961828998	2.036882362	3.496507561	0	0	0	0	0	1.098612289	0	1.098612289	0
103977_bclustnum_94_kamer_1_number_1	6.701004135	6.74248787	6.595780514	1.098612289	1.098612289	1.098612289	0	0	0	0	0	0	0	0	0	1.098612289	1.098612289	1.098612289	0	0	0	1.609437912	0	0	0	0	0	0	1.098612289	1.098612289
10439_bclustnum_7186_kamer_1_number_1	6.446988855	6.450470422	6.543911846	0	0	1.526056303	0	0	0	0	0	0	0	0	0	0	0	0	0	0	0	0	0	0	0	0	0	0	0	0
104502_bclustnum_62_kamer_1_number_1	1.609437912	1.871802177	0	6.476116612	6.49677499	6.536530715	0	0	0	0	0	0	0	0	0	0	0	0	0	0	0	0	0	0	0	0	0	0	0	0
105236_bclustnum_89_kamer_1_number_1	6.892866996	6.864500118	6.769641977	0	0	0	0	0	0	0	0	0	0	1.098612289	1.609437912	0	0	0	0	0	1.558144618	1.098612289	0	0	0	0	0	0	0	0
105254_bclustnum_94_kamer_1_number_1	6.780438819	6.778164683	6.7746398	0	0	0	0	0	0	1.098612289	0	0	0	0	0	0	0	0	0	0	0	0	0	0	0	0	0	0	0	0
10530_bclustnum_1348_kamer_1_number_1	0	0	0	6.775651438	6.777361815	6.748759547	0	0	0	0	0	0	0	0	0	0	0	0	0	0	0	0	0	0	0	0	0	0	0	0
105428_bclustnum_29_kamer_1_number_1	0	0	0	0	0	0	0	0	0	0	0	0	0	0	0	0	0	0	0	0	0	0	0	0	6.674140849	6.521111434	6.565733874	0	0	0
105971_bclustnum_37_kamer_1_number_1	6.423571586	6.354370041	6.514119923	0	0	0	0	0	0	0	0	0	0	0	0	0	0	0	0	0	0	0	0	0	0	0	0	0	0	0
1059_bclustnum_299_kamer_1_number_1	0	0	0	0	0	0	5.20033512	5.249652195	5.319751016	1.098612289	0	0	0	0	0	0	0	1.098612289	6.528444641	6.420808929	6.537415973	0	1.252762968	1.098612289	0	0	0	5.249652195	5.449608247	5.317301031
10606_bclustnum_1968_kamer_1_number_1	6.275388943	6.254468991	6.308704815	6.595780514	6.656726524	6.566203966	0	0	0	0	0	0	0	0	1.526056303	0	0	0	0	0	0	0	0	0	0	0	0	0	0	0
106213_bclustnum_26_kamer_19_number_2	0	1.098612289	0	6.66949809	6.530877628	6.65769007	0	0	0	1.098612289	1.098612289	0	0	0	0	1.098612289	0	1.098612289	0	1.098612289	1.665006953	1.098612289	0	1.098612289	0	0	0	0	0	0
106227_bclustnum_92_kamer_1_number_1	6.421215681	6.5532209	6.464977636	0	0	0	0	0	0	0	0	0	0	0	0	0	0	0	0	0	0	0	0	0	0	0	0	0	0	0
10662_bclustnum_4945_kamer_15_number_2	0	0	0	5.314845029	5.355014285	5.411646052	5.24807615	5.174266605	5.226821365	6.275388943	6.680854679	6.517671273	5.781770766	5.813136008	5.84932478	5.398162702	4.902805065	5.015072104	5.567072703	5.69932924	5.410158339	5.964435019	5.986452005	5.993961427	0	0	0	5.120386158	4.720282993	4.789157022
10686_bclustnum_2219_kamer_1_number_1	0	0	0	0	0	0	0	1.098612289	0	6.151312538	6.98348408	6.844460784	5.442417711	5.311796119	4.966648575	0	0	0	1.098612289	0	0	0	0	0	0	0	0	0	0	0
107041_bclustnum_8_kamer_1_number_1	1.098612289	1.098612289	0	0	0	0	0	0	0	0	0	0	0	0	0	0	0	1.098612289	0	0	0	0	0	0	6.610157542	6.762266972	6.67683154	0	0	0
107061_bclustnum_29_kamer_1_number_1	0	0	1.098612289	2.412936135	2.46548595	2.411780247	0	0	0	0	1.098612289	0	0	0	0	0	0	0	0	0	0	1.098612289	0	0	6.438244328	6.557325082	6.522432446	0	0	0
10714_bclustnum_577_kamer_1_number_1	6.246383859	6.321025455	6.419762002	6.635383405	6.613384218	6.474276424	1.098612289	0	0	3.837915649	4.270695553	4.383811291	1.098612289	1.098612289	1.098612289	2.047692843	1.609437912	0	0	1.098612289	0	1.098612289	1.098612289	0	0	0	0	0	0	0
107421_bclustnum_25_kamer_1_number_1	1.098612289	1.098612289	1.098612289	0	0	0	0	0	0	0	1.098612289	0	0	0	0	0	0	0	0	0	0	0	0	0	6.466834999	6.514383748	6.510423505	0	0	0
107433_bclustnum_24_kamer_1_number_1	0	0	1.558144618	0	0	0	0	0	0	0	0	0	0	0	0	0	0	0	0	0	0	0	0	0	6.583409222	6.707167913	6.585251231	0	0	0
107852_bclustnum_118_kamer_1_number_1	6.861012667	6.856461985	6.796823718	3.202746443	2.653241965	2.785011242	0	0	0	0	0	0	0	0	0	0	0	0	0	0	0	0	0	0	0	0	0	0	0	0
107946_bclustnum_18_kamer_1_number_1	0	0	0	0	0	0	4.101462503	3.918666886	4.072683309	6.508438233	7.221675111	7.180914909	0	0	0	0	0	0	4.200419323	4.242353563	4.012514286	0	0	0	0	0	0	0	0	0
108021_bclustnum_29_kamer_1_number_1	2.197224577	1.945910149	1.609437912	0	0	0	0	0	0	6.014800142	6.698268054	6.659720752	0	0	0	3.542569621	2.722754889	3.218875825	0	0	1.098612289	3.896344741	4.046941935	3.652101355	0	0	0	3.999220365	4.372256563	4.160617516
1088_bclustnum_165_kamer_1_number_1	6.770151606	6.754992136	6.803505258	0	0	0	0	0	0	0	0	0	0	0	0	0	0	0	0	0	0	0	0	0	0	0	0	0	0	0
10916_bclustnum_819_kamer_1_number_1	6.827388686	6.835303934	6.856111397	0	0	0	0	0	0	0	0	0	0	0	0	0	0	0	0	0	0	0	0	0	0	0	0	0	0	0
109219_bclustnum_30_kamer_1_number_1	2.047692843	1.299283893	1.098612289	0	0	0	0	0	0	0	0	0	0	0	0	0	0	0	0	0	0	0	0	0	6.726899847	6.81563999	6.704006183	0	0	0
109223_bclustnum_182_kamer_1_number_1	1.098612289	1.098612289	0	0	1.098612289	0	1.4663363	1.098612289	0	6.50012082	6.938934127	6.937857623	4.849425311	4.632571322	4.588362729	4.011365046	4.380636919	4.870092714	0	0	1.098612289	5.344456401	5.160967263	5.24877517	0	0	0	4.916734787	4.821176326	4.599598694
109249_bclustnum_1_kamer_1_number_1	0	0	0	0	0	0	0	0	0	6.575075841	7.129385686	7.181759231	1.773067525	1.913649615	1.880313545	0	0	0	0	1.098612289	0	0	0	0	0	0	0	0	0	1.098612289
10931_bclustnum_194_kamer_1_number_1	0	0	0	6.657440922	6.693323668	6.663132696	0	0	0	0	0	0	0	0	0	0	0	1.098612289	0	0	0	0	0	0	0	0	0	0	0	0
109340_bclustnum_179_kamer_1_number_1	6.625202695	6.617211783	6.546785411	0	0	0	1.526056303	0	1.526056303	0	0	0	0	0	0	0	0	0	0	0	1.824549292	0	0	0	0	0	0	0	0	0
109392_bclustnum_50_kamer_1_number_1	0	0	0	0	0	0	5.849736799	5.819625853	5.729349502	4.638885387	4.845501183	4.71252571	2.197224577	2.146581364	1.435084525	5.785580564	5.490708884	5.381214458	6.527330528	6.35188173	6.398832843	5.371967377	5.254516983	5.482878081	0	0	0	1.900959106	1.315676062	1.098612289
10951_bclustnum_1415_kamer_1_number_1	0	0	0	0	0	0	3.496507561	3.571541944	3.470191586	5.55129541	6.671128739	6.733912476	0	0	0	0	0	0	3.424728344	3.496507561	3.415382956	0	0	0	0	0	0	0	1.098612289	1.421386371
10961_bclustnum_247_kamer_1_number_1	6.771018755	6.768493212	6.693571469	0	0	0	0	0	0	0	0	0	0	0	0	0	0	0	0	0	0	0	0	0	0	0	0	0	0	0
1096_bclustnum_5316_kamer_1_number_1	0	0	0	0	0	0	1.098612289	1.609437912	1.864785308	4.619359046	6.984188403	6.974881075	2.538976503	2.843850684	2.112964563	0	0	0	0	1.098612289	1.504077397	2.632543302	2.944438979	2.864797507	0	1.098612289	0	1.36330461	1.609437912	0
11016_bclustnum_542_kamer_1_number_1	0	0	0	0	0	0	4.448516376	4.114963849	4.465908119	6.50204014	5.866468057	5.872821767	0	0	0	0	0	0	4.649187071	4.755743044	4.474491862	0	0	0	0	0	0	0	0	0
110338_bclustnum_32_kamer_2_number_2	7.149131599	7.074844748	7.147331078	0	0	0	0	0	0	0	0	0	0	0	0	0	0	0	0	0	0	0	0	0	0	0	0	0	0	0
110479_bclustnum_251_kamer_1_number_1	1.098612289	0	0	0	0	0	0	0	0	0	0	0	0	0	0	0	0	0	0	0	0	0	0	0	6.038972938	6.601569735	6.526860825	0	0	0
110494_bclustnum_189_kamer_1_number_1	0	0	0	0	0	0	0	0	0	5.971493956	6.589675853	6.383660339	0	0	0	0	0	1.098612289	0	0	0	0	0	0	0	0	0	0	0	0
11083_bclustnum_407_kamer_1_number_1	6.605898552	6.587091232	6.827939046	0	0	0	1.098612289	0	0	0	0	0	0	0	0	2.079441542	1.609437912	0	0	0	0	1.098612289	0	0	0	0	0	0	0	0
111233_bclustnum_393_kamer_1_number_1	1.098612289	0	1.098612289	6.506904508	6.604910837	6.652863029	0	0	0	0	0	0	0	0	0	1.098612289	0	0	0	0	0	1.098612289	1.098612289	1.673975809	0	0	0	0	0	0
111284_bclustnum_306_kamer_1_number_1	6.54359237	6.518983558	6.396374501	0	0	0	0	0	0	0	0	0	0	0	0	0	0	0	0	1.098612289	0	1.098612289	0	0	0	0	0	0	0	0
111499_bclustnum_16_kamer_1_number_1	0	0	0	0	0	0	1.098612289	1.686398954	2.014903021	1.098612289	1.098612289	0	6.560086798	6.506780574	6.535885476	1.421386371	1.098612289	1.349925976	2.335374593	3.065463539	1.977162385	1.349925976	1.686398954	1.098612289	0	0	0	3.122994682	3.091042453	3.442019376
111845_bclustnum_117_kamer_6_number_2	6.676903344	6.703888481	6.675462501	0	0	0	0	0	0	0	0	0	0	0	0	0	0	0	0	0	0	0	0	0	0	0	0	0	0	0
111861_bclustnum_10_kamer_1_number_1	0	0	0	0	0	1.098612289	1.791759469	1.098612289	0	6.011490189	7.093030802	7.12805479	3.502001533	3.34830632	3.416233766	1.572396263	1.773067525	1.745238977	1.745238977	1.773067525	2.197224577	4.582180947	4.506855898	4.600614826	0	0	0	4.930545363	4.717686041	4.839886514
112385_bclustnum_78_kamer_1_number_1	0	0	0	0	0	0	0	0	0	6.33150185	6.903747258	6.853299093	0	0	0	0	0	0	0	1.098612289	0	0	0	0	0	0	0	0	0	0
112584_bclustnum_22_kamer_1_number_1	0	0	0	0	0	1.098612289	4.436751534	4.559126247	4.716264233	6.581332378	6.426892906	6.367329185	5.811140993	5.733341277	5.723585102	4.564348191	4.439705746	4.656338473	5.390212631	5.472270674	5.427150238	5.856503562	5.673323267	5.832615346	0	0	0	5.48583374	5.313205979	5.225746674
112643_bclustnum_25_kamer_1_number_1	6.506082969	6.538429217	6.470180117	6.496473286	6.541895425	6.492542819	0	0	0	0	0	0	0	0	0	1.098612289	0	1.098612289	0	0	0	0	1.098612289	0	0	0	0	0	0	0
112678_bclustnum_17_kamer_1_number_1	2.00148	2.785011242	2.360854001	2.708050201	2.00148	1.945910149	2.564949357	1.335001067	2.564949357	11.34204461	0	0	0	1.098612289	1.945910149	0	1.098612289	0	0	0	0	1.098612289	2.397895273	1.098612289	2.871681512	2.908719078	2.871681512	1.609437912	0	2.564949357
11290_bclustnum_27_kamer_1_number_1	0	1.609437912	0	0	1.098612289	0	0	0	0	6.31052355	6.687643378	6.632331104	0	0	0	1.098612289	0	0	0	0	0	0	0	0	0	1.098612289	0	0	0	0
113027_bclustnum_45_kamer_9_number_2	0	0	0	0	0	0	4.779123493	4.809856445	4.926216916	6.532334292	6.637258031	6.71503666	0	1.098612289	0	5.250774924	4.862027005	4.855376222	5.231108617	5.522032754	4.99624559	5.532258415	5.448584802	5.571065988	0	0	0	0	0	0
113172_bclustnum_453_kamer_1_number_1	6.776760096	6.701277086	6.729558802	0	0	0	0	0	0	0	0	0	0	0	0	0	0	0	1.098612289	1.098612289	0	0	0	0	0	0	0	0	0	0
113193_bclustnum_14_kamer_1_number_1	0	0	0	1.098612289	0	0	6.843597485	6.884779342	6.850277638	0	0	0	0	0	0	1.824549292	1.609437912	1.435084525	5.935272431	5.777652323	5.733341277	0	1.098612289	0	0	0	0	0	0	0
1131_bclustnum_131_kamer_1_number_1	0	0	0	0	0	0	0	0	0	5.802873377	6.785305119	6.681168306	0	0	0	0	0	0	0	0	0	0	0	0	0	0	0	0	0	0
1131_bclustnum_4251_kamer_1_number_1	0	0	0	0	0	0	0	1.098612289	0	5.269264386	6.632959158	6.76776191	0	0	0	0	0	0	1.098612289	0	0	0	0	0	0	0	0	0	0	0
11343_bclustnum_6064_kamer_1_number_1	0	0	0	6.734774759	6.721518468	6.727800519	0	0	0	0	0	0	0	0	0	0	0	0	0	0	0	0	0	0	0	0	0	0	0	0
114082_bclustnum_59_kamer_1_number_1	3.753418757	3.120896887	3.356628794	0	0	1.098612289	3.654978765	3.583518938	3.821369367	4.138238633	6.525142555	6.603214561	0	1.252762968	1.098612289	1.098612289	1.285196968	1.098612289	1.098612289	1.504077397	0	3.884372222	3.580990745	3.850147602	1.609437912	0	1.533929576	3.518307598	3.713572067	3.570813566
1140_bclustnum_2007_kamer_1_number_1	5.400422589	5.235111291	5.164785974	6.66440902	6.708084084	6.649415804	1.098612289	1.832581464	1.488076733	1.098612289	1.76766143	1.386294361	0	0	0	0	0	0	1.098612289	1.845826164	1.386294361	0	0	0	0	0	0	0	0	0
11423_bclustnum_60_kamer_1_number_1	0	0	0	0	0	0	0	0	0	0	0	0	6.782948006	6.740125665	6.774223886	0	0	0	0	0	0	0	0	0	0	0	0	0	0	0
11426_bclustnum_88_kamer_1_number_1	0	0	0	0	0	0	1.563976003	0	0	5.18178355	7.081985859	6.986566459	3.782121588	3.983921252	4.007333185	1.098612289	1.098612289	0	1.568615918	0	0	1.098612289	1.493926046	0	0	0	0	0	0	0
114371_bclustnum_121_kamer_1_number_1	0	0	0	0	0	0	1.098612289	1.098612289	1.098612289	6.67676855	6.011879732	6.005120874	0	0	0	0	0	0	1.178654996	1.558144618	0	0	0	0	0	0	0	0	0	0
114400_bclustnum_267_kamer_1_number_1	0	0	0	0	0	0	0	0	0	5.963065073	6.65544035	6.669180781	0	1.098612289	0	0	1.526056303	1.609437912	0	0	0	0	0	0	0	0	0	0	1.098612289	0
114400_bclustnum_83_kamer_1_number_1	0	0	0	0	0	0	1.098612289	0	1.540445755	6.066822452	6.599870499	6.539474678	0	1.098612289	1.098612289	1.098612289	0	0	1.098612289	0	0	0	1.098612289	0	0	0	0	0	0	0
114429_bclustnum_24_kamer_1_number_1	0	1.098612289	0	0	0	0	0	0	0	0	0	0	0	0	0	0	0	0	0	0	0	0	0	0	6.656843484	6.617767885	6.753862566	0	0	0
114530_bclustnum_108_kamer_1_number_1	1.098612289	0	1.609437912	1.098612289	1.504077397	1.686398954	4.17438727	4.272026205	4.272026205	5.029666382	7.185636984	7.13169851	5.442993302	5.395140038	5.551147867	3.197313009	3.180829142	3.295836866	4.483809006	4.527980239	3.861430518	5.104325981	5.299316867	5.128317584	1.098612289	0	0	4.458215387	4.803471714	4.273884476
114561_bclustnum_186_kamer_1_number_1	0	0	0	1.516348465	0	1.098612289	4.626060457	5.267858159	5.393627546	5.307817101	6.638567789	5.507913565	6.11146734	6.172743894	6.060290738	4.077537444	4.849425311	4.298984642	4.748092347	4.743348266	4.746513486	5.018484409	4.809220618	4.898518674	0	0	0	5.239098007	5.204006687	5.395897695
114746_bclustnum_24_kamer_1_number_1	0	0	0	0	0	0	5.3573737	5.419060461	5.296650979	6.326745002	6.527470957	6.577354971	0	1.315676062	2.174751721	3.926464227	4.172462341	4.065602093	6.193043239	6.178290527	6.371611847	4.416428061	3.883623531	4.580318936	0	0	0	3.258096538	2.57883709	2.708050201
11499_bclustnum_40_kamer_1_number_1	0	0	0	6.409352175	6.392754284	6.522092798	0	0	0	0	0	0	0	0	0	0	0	0	0	0	0	0	0	0	0	0	0	0	0	0
115147_bclustnum_20_kamer_1_number_1	0	0	0	0	0	0	4.94875989	4.65396035	4.828313737	6.200509174	6.626717749	6.225548038	0	0	0	0	1.609437912	1.860752118	5.231108617	5.164785974	5.056245805	1.945910149	2.564949357	1.299283893	0	0	0	0	0	0
115206_bclustnum_16_kamer_2_number_2	6.646130741	6.58396232	6.58837612	0	0	0	0	0	0	0	0	0	0	0	0	0	0	0	0	0	0	0	0	0	0	0	0	0	0	0
11527_bclustnum_1836_kamer_1_number_1	0	0	0	0	0	0	4.760617168	4.590056548	4.899875041	5.748118288	6.515789148	6.539454444	4.691347882	4.519612298	4.42604352	0	0	0	4.883385086	4.807171814	4.671266868	0	0	0	0	0	0	4.158883083	4.399920579	4.284964922
11534_bclustnum_31_kamer_1_number_1	0	0	0	1.098612289	0	0	5.975335165	6.70073111	6.033565723	5.410752796	4.825108606	4.828313737	1.098612289	0	0	0	0	0	4.506454213	4.587006215	4.379523504	0	0	0	0	0	0	0	0	0
115533_bclustnum_4_kamer_1_number_1	0	0	0	0	0	0	0	0	0	0	0	0	6.771935556	6.741700695	5.948034989	0	0	0	0	0	0	0	0	0	0	0	0	0	0	0
116012_bclustnum_29_kamer_1_number_1	0	0	0	0	0	0	0	1.098612289	1.098612289	4.754253764	6.489555934	6.561030666	5.007597351	4.697448502	4.663439094	1.098612289	1.098612289	1.098612289	1.421386371	1.098612289	0	5.311687585	5.335685403	5.32675418	0	0	0	4.655425942	4.687100342	4.502370832
11629_bclustnum_495_kamer_12_number_2	0	0	0	0	0	0	5.439942789	5.459585514	5.532258415	6.758426621	7.093761705	7.051604509	0	0	0	3.754533759	3.172081867	3.386807678	1.904238091	2.024381953	2.371578364	4.328851307	4.40147871	4.42911416	0	0	0	2.520000268	1.904238091	1.815290432
116633_bclustnum_179_kamer_1_number_1	7.085273652	7.064331586	7.037686449	0	0	0	0	0	0	0	0	0	2.302585093	2.564949357	2.197224577	0	0	0	0	0	0	0	0	0	2.882401188	2.607964637	2.669212348	0	0	0
116687_bclustnum_45_kamer_1_number_1	6.541350294	6.598357791	6.547103868	6.067137722	6.02021477	5.923365026	2.197224577	1.413693065	2.397895273	2.277267285	1.236761337	1.665006953	1.704748092	0	0	1.540445755	0	0	2.327277706	1.609437912	1.945910149	1.098612289	1.098612289	1.098612289	1.098612289	2.397895273	1.945910149	0	1.694594904	0
116720_bclustnum_154_kamer_1_number_1	0	0	0	0	0	0	1.945910149	1.098612289	2.197224577	3.916015027	3.978641861	4.364371699	6.654925417	6.676075397	6.752503994	0	0	0	1.526056303	1.098612289	1.098612289	0	0	0	0	0	1.609437912	1.098612289	1.880313545	0
116720_bclustnum_17_kamer_1_number_1	0	0	0	0	0	0	1.098612289	0	0	1.446918983	1.098612289	1.098612289	0	1.504077397	1.386294361	0	0	0	6.369900983	6.551080335	6.42519312	0	0	0	0	0	0	1.098612289	0	1.098612289
116764_bclustnum_77_kamer_1_number_1	0	1.098612289	1.098612289	6.577861358	6.598823693	6.517671273	0	0	0	0	0	0	0	0	0	0	0	0	0	0	0	0	0	0	0	0	0	0	0	0
116932_bclustnum_256_kamer_1_number_1	0	0	0	0	0	0	0	0	0	6.504454327	6.483616396	6.462336549	0	0	1.609437912	0	0	0	0	0	1.098612289	0	0	0	0	0	0	0	0	1.098612289
11718_bclustnum_136_kamer_1_number_1	0	0	0	0	0	0	0	0	0	5.814130532	6.724004301	6.740012139	0	0	0	0	0	0	0	0	0	0	0	0	0	0	0	0	0	0
117343_bclustnum_256_kamer_1_number_1	0	0	0	0	0	0	1.446918983	0	1.098612289	6.325254619	6.503913852	6.485398303	0	0	0	1.098612289	0	0	1.170070563	0	1.098612289	0	0	0	0	0	0	0	0	0
117363_bclustnum_709_kamer_1_number_1	6.630155542	6.566953684	6.623002246	0	0	0	0	0	0	0	0	0	0	0	0	0	0	0	0	0	0	0	0	0	0	0	0	0	0	0
117530_bclustnum_45_kamer_1_number_1	6.580242387	6.491157431	6.519779831	1.098612289	0	0	0	0	0	0	0	0	0	0	0	0	0	0	0	1.098612289	1.098612289	1.435084525	0	0	0	0	0	1.098612289	1.299283893	1.098612289
117695_bclustnum_21_kamer_1_number_1	0	0	0	0	1.098612289	0	6.442009771	6.534757845	6.589613999	0	0	0	0	0	0	0	0	0	5.068904202	4.668144985	4.892849758	0	0	0	0	0	0	0	0	0
117992_bclustnum_94_kamer_1_number_1	6.584198675	6.495913382	6.588140749	0	0	0	0	0	0	0	0	0	0	0	0	0	0	0	0	0	0	0	0	0	0	0	0	0	0	0
11804_bclustnum_1762_kamer_1_number_1	0	0	0	0	0	0	4.418840608	4.506454213	4.729156166	6.873784759	7.570237045	7.593575684	1.609437912	1.913649615	1.609437912	0	0	0	3.025291076	3.45946629	3.742420221	2.379546134	2.517696473	2.667228207	0	0	0	1.098612289	0	0
118259_bclustnum_25_kamer_1_number_1	6.6455642	6.578114455	6.723067725	0	0	0	0	0	0	0	0	0	0	0	0	0	0	0	0	0	0	0	1.098612289	0	0	0	0	1.098612289	1.098612289	1.098612289
11829_bclustnum_2439_kamer_2_number_2	6.623685342	6.639875834	6.649908993	6.029653478	5.880133465	5.926163068	0	0	0	1.098612289	0	1.098612289	0	0	1.349925976	0	0	0	0	0	1.098612289	0	0	0	1.098612289	0	0	0	0	1.526056303
118435_bclustnum_46_kamer_1_number_1	6.931579222	6.934611403	6.914293856	1.098612289	0	0	0	0	1.098612289	0	0	0	1.098612289	1.098612289	1.098612289	0	0	0	0	0	0	0	0	0	0	1.098612289	0	1.098612289	0	0
118516_bclustnum_25_kamer_1_number_1	6.716292064	6.77062542	6.675192506	0	0	0	0	0	0	0	0	0	0	0	0	0	0	0	0	0	0	0	0	0	0	0	0	0	0	0
1185_bclustnum_639_kamer_1_number_1	1.098612289	0	0	0	0	0	1.098612289	0	0	6.550311468	6.831787424	6.74894007	5.991272029	5.998522084	5.766860555	0	0	0	0	0	1.098612289	0	0	0	0	0	0	0	0	1.098612289
118815_bclustnum_110_kamer_1_number_1	6.469693629	6.526285467	6.492023145	1.36330461	0	1.832581464	0	0	0	0	0	0	0	0	0	0	0	0	0	0	0	0	0	0	0	0	0	0	0	0
118879_bclustnum_94_kamer_1_number_1	6.90642139	6.83876205	6.849243361	0	0	0	0	0	0	1.098612289	0	0	0	1.098612289	1.098612289	0	0	1.098612289	0	0	1.098612289	0	1.098612289	0	0	0	0	0	0	0
118900_bclustnum_350_kamer_1_number_1	2.302585093	1.92368645	2.685579618	1.815290432	1.098612289	1.098612289	3.526360525	3.784189634	4.147095128	5.944257629	7.158903027	7.092365881	1.280933845	1.609437912	1.405341801	3.709497925	3.654194837	3.625553531	0	1.791759469	2.079441542	2.723615104	3.22419366	2.614962217	0	0	0	1.510591688	1.098612289	1.791759469
119610_bclustnum_7_kamer_1_number_1	0	0	0	6.572282543	6.522092798	6.569014271	0	0	0	0	0	0	0	0	0	0	0	0	0	0	0	0	0	0	0	0	0	0	0	0
120230_bclustnum_39_kamer_1_number_1	6.52536831	6.574431281	6.49375384	4.377851682	4.641183839	4.167526868	0	0	0	0	0	0	0	0	0	0	0	0	0	0	0	0	0	0	0	0	1.609437912	0	0	0
12039_bclustnum_3876_kamer_1_number_1	0	0	0	0	0	0	4.369447852	3.691149376	4.469731833	5.881462722	6.478509642	6.622470331	0	0	0	4.343805422	4.480173696	4.590056548	4.343805422	4.912654886	4.669711832	5.545958389	5.527045296	5.051457289	0	0	0	4.456670178	4.502029427	4.549657476
1203_bclustnum_3128_kamer_1_number_1	0	0	0	0	0	0	3.713572067	3.741863194	3.511545439	4.527809545	6.680706613	6.733751831	4.542669055	4.649464545	4.735680771	4.298041583	3.733458383	3.702027637	5.356062553	5.163516597	4.455638323	3.713572067	3.555348061	3.514174815	0	0	0	3.758461485	3.987894564	3.796149645
120711_bclustnum_1_kamer_1_number_1	0	0	0	0	0	0	0	0	0	6.29489693	6.808376835	6.720461381	0	0	0	0	0	0	1.609437912	1.098612289	0	1.098612289	0	0	0	0	0	0	0	0
120914_bclustnum_63_kamer_1_number_1	0	0	1.098612289	1.609437912	1.098612289	1.098612289	5.664116062	5.109979749	5.271860448	6.17204918	7.154357511	7.168325628	2.751537441	3.245194432	2.97892685	1.098612289	1.4663363	0	6.05990093	6.097325687	6.165417854	0	1.098612289	0	1.098612289	0	0	1.945910149	2.120263136	1.734601644
12098_bclustnum_1155_kamer_1_number_1	0	0	0	0	0	0	4.727387819	4.703503066	4.574710979	7.002556238	6.964447473	6.979666554	1.098612289	2.197224577	1.098612289	1.413693065	1.098612289	0	4.651843826	4.532599493	4.437409306	2.765620752	2.268683886	1.540445755	0	0	0	0	0	0
121382_bclustnum_179_kamer_1_number_1	1.098612289	1.871802177	0	0	0	0	0	0	1.098612289	1.704748092	0	0	1.609437912	2.367123927	2.335374593	2.611201505	1.578184575	1.343733877	0	0	0	6.50968526	6.49461731	6.504074079	0	0	0	0	0	0
12250_bclustnum_6550_kamer_1_number_1	1.694594904	2.036882362	1.563976003	0	0	0	0	0	0	1.609437912	0	0	0	0	0	2.42548391	2.1768155	2.069780019	0	0	0	4.54609087	4.57904282	4.452509562	7.297917222	7.303621128	7.280008253	0	0	0
122569_bclustnum_26_kamer_1_number_1	0	0	0	0	0	0	1.098612289	1.349925976	0	6.581143864	6.03787092	5.779508185	0	1.609437912	1.098612289	1.098612289	0	0	0	1.098612289	0	1.098612289	1.098612289	1.098612289	0	0	0	0	0	0
122859_bclustnum_98_kamer_1_number_1	6.697034248	6.756545105	6.64855311	0	0	0	0	0	0	0	0	0	0	0	0	0	0	0	1.098612289	1.609437912	0	0	0	0	0	0	0	0	0	0
123111_bclustnum_25_kamer_71_number_3	6.56143511	6.506211473	6.58656606	0	0	0	0	0	0	0	0	0	0	0	0	0	0	0	0	0	0	0	0	0	0	0	0	0	0	0
123493_bclustnum_45_kamer_4_number_2	6.449944217	6.447305863	6.447305863	6.559143455	6.587091232	6.643356045	1.504077397	1.098612289	0	0	0	1.098612289	0	0	0	0	0	0	1.098612289	0	0	0	0	1.098612289	0	0	1.098612289	0	0	0
1234_bclustnum_5685_kamer_1_number_1	0	0	0	0	0	0	5.018484409	5.225257307	5.164785974	6.349138991	6.455055471	6.505511975	0	0	1.098612289	4.017202505	3.69567382	3.544905152	4.684655815	4.696335424	4.17438727	5.31051764	5.297862263	5.273932457	0	0	0	5.596735352	5.477162053	5.499771391
123679_bclustnum_0_kamer_1_number_1	0	0	0	0	0	0	0	0	0	0	0	0	0	0	0	0	0	0	0	0	0	0	0	0	6.532599177	7.074116816	6.466991955	0	0	0
12391_bclustnum_1034_kamer_1_number_1	0	0	0	3.583518938	3.33220451	3.33220451	2.356652735	2.54770929	2.335374593	6.629363253	6.148231088	6.169378488	3.702673872	3.279240648	3.15463166	3.489751457	3.02313341	3.182672315	0	1.098612289	1.098612289	4.525404857	4.493617203	4.617316125	0	0	0	3.455265656	4.007333185	3.529622845
124160_bclustnum_135_kamer_1_number_1	6.854618181	6.777931291	6.865369562	1.098612289	1.098612289	1.098612289	0	0	0	0	0	0	0	0	0	0	0	0	0	0	0	0	0	0	0	0	0	0	0	0
124377_bclustnum_59_kamer_13_number_2	0	0	0	0	0	0	4.939261018	4.872652102	4.762173935	6.300174599	6.566203966	6.454674841	0	0	0	0	0	0	1.098612289	1.609437912	1.386294361	0	0	0	0	0	0	0	0	0
124380_bclustnum_25_kamer_1_number_1	1.098612289	1.945910149	1.098612289	6.42630883	6.365514665	6.513724054	0	0	0	1.945910149	1.098612289	1.609437912	0	0	0	0	0	0	0	0	1.098612289	0	0	0	0	0	0	0	1.098612289	0
124570_bclustnum_8_kamer_1_number_1	7.206622069	7.169865665	7.174976958	0	0	0	0	0	0	0	0	0	0	0	0	0	0	0	0	0	0	0	0	0	0	0	0	0	0	0
1245_bclustnum_990_kamer_1_number_1	0	0	0	0	0	0	1.098612289	1.098612289	1.421386371	6.530002609	6.6868592	6.603672785	0	0	0	0	0	0	1.098612289	1.098612289	1.76766143	0	0	0	0	0	0	0	0	0
125460_bclustnum_30_kamer_1_number_1	0	0	0	0	0	0	3.728100167	3.995137299	3.650658241	5.752924958	6.459033966	6.512269709	4.959734905	4.870944016	5.099189369	4.8978398	4.342361523	4.08691033	5.460057743	5.401176256	5.093068987	4.951118808	4.456670178	4.744932128	1.098612289	1.098612289	1.427117156	3.884995018	3.713572067	4.023727158
12585_bclustnum_364_kamer_1_number_1	0	0	0	0	0	0	4.804021045	4.790819533	4.732199234	6.379154272	6.751435916	6.643603518	0	1.609437912	0	0	0	0	4.736996376	4.645265517	4.743478899	0	0	0	0	0	0	2.957511061	3.188416617	3.008154794
12596_bclustnum_3501_kamer_4_number_2	0	0	0	0	0	0	2.68881981	2.970414466	2.708050201	6.10646594	6.65544035	6.575474645	1.098612289	1.098612289	0	1.098612289	1.098612289	0	1.815290432	1.609437912	2.564949357	0	0	0	0	0	0	3.218875825	3.091042453	2.740840024
12599_bclustnum_926_kamer_1_number_1	1.098612289	1.098612289	1.098612289	0	0	0	0	0	0	0	0	0	0	0	0	0	0	0	0	0	0	0	0	0	7.08938493	7.043159916	7.068316794	0	0	0
126011_bclustnum_187_kamer_1_number_1	0	1.098612289	1.098612289	6.533498098	6.49375384	6.416405432	0	0	0	0	0	0	0	0	0	0	0	0	0	0	0	0	0	0	1.098612289	0	1.609437912	1.558144618	1.558144618	1.609437912
126388_bclustnum_107_kamer_1_number_1	0	1.098612289	1.098612289	0	0	0	0	0	0	0	0	0	0	0	0	0	0	0	0	0	0	0	0	1.098612289	6.970391993	7.108914946	6.936517648	0	0	0
126431_bclustnum_120_kamer_1_number_1	0	0	1.945910149	0	0	0	0	0	0	0	0	0	0	0	0	0	0	0	0	0	0	0	0	1.098612289	6.69950034	6.713867086	6.713867086	0	0	0
1269_bclustnum_9822_kamer_1_number_1	0	0	0	6.71417053	6.605684856	6.65929392	0	0	0	0	0	0	0	1.098612289	0	0	0	0	0	0	0	0	0	0	0	0	0	0	0	0
127635_bclustnum_893_kamer_1_number_1	0	0	0	0	0	0	0	0	0	6.144899971	6.458164287	6.518326893	0	0	0	0	0	0	0	0	0	0	0	1.413693065	0	0	0	0	0	0
1276_bclustnum_6443_kamer_1_number_1	6.585022029	6.56220819	6.608225971	0	0	0	0	0	0	0	0	0	0	0	0	0	0	0	0	0	0	0	0	0	0	1.098612289	0	0	0	0
12784_bclustnum_3849_kamer_1_number_1	0	0	0	0	0	0	1.098612289	1.609437912	1.504077397	6.709982159	6.258305316	6.115401939	0	0	0	0	0	0	0	1.4663363	1.540445755	0	0	0	0	0	0	0	0	0
127919_bclustnum_22_kamer_1_number_1	7.122519824	7.143507012	7.052599935	0	0	0	0	0	0	0	0	0	0	0	0	0	0	0	0	0	0	0	1.098612289	0	0	0	0	0	0	0
12792_bclustnum_1709_kamer_1_number_1	0	0	0	1.098612289	0	1.098612289	6.486668282	6.506281694	6.589384419	2.32238772	3.683866912	3.867025639	1.098612289	2.00148	1.757857918	0	0	0	6.384068977	6.459904454	6.409627035	1.098612289	0	0	0	0	0	2.708050201	2.833213344	2.793205969
12824_bclustnum_504_kamer_55_number_3	6.821470547	6.794586581	6.797195716	0	0	0	0	0	0	0	0	0	0	0	0	0	0	0	0	0	0	0	0	0	0	0	0	0	0	0
128339_bclustnum_63_kamer_1_number_1	0	1.098612289	0	0	0	0	4.493617203	4.491129888	4.737171659	5.855707823	6.579097033	6.564481565	0	0	0	0	0	0	5.503068815	5.260387021	5.286583797	0	0	0	0	0	0	0	1.098612289	0
128539_bclustnum_55_kamer_1_number_1	0	1.806797496	1.098612289	0	0	0	0	0	0	0	0	0	0	0	0	0	0	0	0	0	0	0	0	0	6.67145683	6.767133667	6.722410758	0	0	0
1287_bclustnum_4584_kamer_1_number_1	5.685740696	5.680793577	5.717925325	0	0	0	0	0	0	6.018941086	6.813224795	6.767803319	0	0	0	1.526056303	1.098612289	1.481604541	1.481604541	1.098612289	1.098612289	0	1.098612289	1.098612289	0	0	0	0	1.098612289	0
129067_bclustnum_55_kamer_18_number_3	0	0	0	0	0	0	0	0	0	6.139884552	7.134691629	7.098995281	0	0	0	0	0	0	0	1.098612289	0	0	0	0	0	0	0	0	0	0
129268_bclustnum_11_kamer_1_number_1	0	0	0	1.098612289	1.098612289	1.098612289	6.182772687	6.112451334	6.203209379	7.157649811	7.846155779	7.849195105	0	0	0	1.098612289	0	0	7.613872978	7.284745464	7.475905969	0	0	1.609437912	0	0	0	0	0	0
129359_bclustnum_29_kamer_1_number_1	0	0	0	0	0	0	1.609437912	1.098612289	1.098612289	4.928701911	7.522632762	7.457199512	2.288196066	2.243744441	1.098612289	0	1.098612289	0	3.59535418	3.252585225	3.166078242	1.526056303	1.145133213	1.845826164	0	0	0	0	1.098612289	0
129394_bclustnum_82_kamer_1_number_1	6.833390505	6.835782257	6.800046453	0	0	0	0	0	0	1.4663363	0	1.609437912	1.098612289	1.609437912	1.098612289	0	0	0	0	1.098612289	0	0	0	0	0	0	0	0	0	0
129674_bclustnum_20_kamer_3_number_2	0	0	0	0	0	0	0	0	0	6.828351617	6.964768682	6.867974409	6.296495872	6.248042875	6.31052355	0	0	0	1.609437912	1.098612289	0	1.897120485	1.098612289	1.098612289	0	0	0	3.995137299	4.127134385	4.043051268
129825_bclustnum_35_kamer_1_number_1	0	0	0	0	0	0	0	0	0	6.448210366	6.902072161	6.603605014	0	0	0	0	0	0	0	1.526056303	1.098612289	0	1.098612289	0	0	0	0	0	0	0
130224_bclustnum_193_kamer_1_number_1	6.273348593	6.080948698	6.061456919	6.663525978	6.759255271	6.838226192	0	0	0	0	0	0	0	0	0	1.098612289	0	0	0	0	0	1.098612289	0	1.098612289	0	0	0	0	0	0
130239_bclustnum_38_kamer_1_number_1	6.850549805	6.849490371	6.856251436	4.744932128	4.838921278	4.773502684	0	1.098612289	0	0	0	1.609437912	0	0	0	0	0	0	1.098612289	0	1.563976003	0	0	0	0	0	0	0	0	0
13024_bclustnum_1838_kamer_1_number_1	6.902742737	6.768780527	6.800726706	0	0	0	0	0	0	0	0	0	0	0	0	0	0	0	0	0	0	0	0	0	0	0	0	0	0	0
130382_bclustnum_68_kamer_1_number_1	0	0	0	0	0	0	4.164077382	3.713572067	3.713572067	4.647587707	6.508934548	6.759587002	0	0	0	0	0	0	0	1.098612289	0	0	0	0	0	0	0	0	0	0
130486_bclustnum_39_kamer_1_number_1	0	1.098612289	0	0	0	0	0	0	0	0	0	0	0	0	0	0	0	0	0	0	0	0	0	0	6.480044562	6.636883125	6.641742065	0	0	0
130564_bclustnum_19_kamer_1_number_1	0	0	0	0	0	0	0	0	0	6.373887888	6.670344179	6.725433322	0	0	0	0	0	0	0	0	0	0	0	0	0	0	0	0	0	0
130722_bclustnum_26_kamer_1_number_1	0	0	0	0	0	0	5.198497031	5.171296165	4.944702023	5.831231239	6.592848625	6.658743768	1.098612289	0	1.098612289	1.098612289	1.860752118	0	5.23415744	5.200075895	5.204792093	0	1.098612289	1.609437912	0	0	0	0	0	0
130936_bclustnum_2_kamer_1_number_1	1.704748092	1.609437912	1.098612289	2.360854001	2.164964207	2.433613355	6.295266001	6.254167216	6.29254829	6.422196087	7.115297764	7.207556122	1.098612289	1.098612289	1.421386371	4.745957689	4.510859507	4.557584746	7.176567939	7.058758153	7.236000913	4.878786295	4.830191972	4.863680881	1.609437912	0	1.098612289	1.710789804	1.280933845	1.349925976
131114_bclustnum_45_kamer_1_number_1	0	0	0	7.807814998	7.82264503	7.859895664	0	0	0	0	1.098612289	0	0	0	0	0	0	0	0	0	0	0	0	0	0	0	0	0	0	0
131728_bclustnum_72_kamer_1_number_1	6.805722553	6.85372139	6.793690323	0	0	1.098612289	0	0	0	0	0	0	0	0	0	0	0	0	0	0	0	0	0	0	0	0	0	0	0	0
132086_bclustnum_87_kamer_1_number_1	0	0	0	0	0	0	0	0	0	1.098612289	1.098612289	1.098612289	0	0	0	5.893791077	6.586171655	6.585559053	0	0	0	6.12439232	6.519967011	6.52225602	0	0	0	4.415392501	4.680806276	4.422276866
13252_bclustnum_23_kamer_1_number_1	0	1.860752118	1.609437912	0	0	0	0	0	0	0	0	0	0	0	0	0	0	0	0	0	0	0	0	0	6.656910312	6.646204783	6.637632797	0	0	0
132647_bclustnum_63_kamer_1_number_1	6.402331705	6.583409222	6.364320372	5.840225873	5.880133465	5.895190403	1.098612289	0	0	0	0	0	0	0	0	0	0	0	0	0	0	1.098612289	0	0	0	0	0	1.098612289	0	0
132907_bclustnum_12_kamer_1_number_1	6.778025793	6.852594516	6.672454376	0	0	0	0	0	0	0	0	0	1.563976003	1.098612289	1.32175584	0	0	0	0	0	0	0	0	0	0	0	0	0	0	0
132928_bclustnum_5_kamer_1_number_1	0	1.098612289	0	6.668228248	6.639295273	6.672454376	0	0	0	0	0	0	0	0	0	0	0	0	0	0	0	0	0	0	0	0	0	0	0	0
133101_bclustnum_65_kamer_1_number_1	1.098612289	0	1.880313545	0	0	0	0	0	0	0	0	0	0	0	0	0	0	0	0	0	0	0	0	0	6.51174533	6.517343302	6.497780518	0	0	0
133296_bclustnum_34_kamer_1_number_1	1.170070563	0	0	0	0	0	0	0	1.098612289	0	0	0	0	0	0	0	0	0	0	0	0	0	0	0	6.625392368	6.567515956	6.685306486	0	0	0
1333_bclustnum_2706_kamer_2_number_2	0	0	0	0	0	0	0	0	0	6.710871404	6.244166901	6.278521424	0	0	0	2.590264665	1.945910149	2.68881981	1.609437912	2.397895273	1.609437912	3.601868986	3.729702249	3.357395257	0	0	0	0	0	0
133481_bclustnum_51_kamer_1_number_1	0	0	0	0	0	0	4.913573581	4.900634399	4.958464422	6.228511004	6.513230111	6.569306089	5.197114861	5.13800189	5.047449267	4.009603334	4.164725359	4.262679877	5.899212187	5.865759591	6.021326701	4.853981484	5.184588601	5.071259916	0	0	0	1.098612289	1.098612289	0
133495_bclustnum_7_kamer_1_number_1	0	0	0	0	0	0	0	0	0	5.822060203	6.777013136	6.797319685	0	0	0	0	0	0	0	0	0	0	0	0	0	0	0	0	0	0
133512_bclustnum_62_kamer_1_number_1	0	0	0	7.219744524	7.190894549	7.190457472	0	0	0	0	0	0	0	0	0	0	0	0	0	0	0	0	0	0	0	0	0	0	0	0
133587_bclustnum_533_kamer_1_number_1	1.516348465	1.791759469	1.945910149	0	0	0	0	0	0	0	0	0	0	0	0	0	0	0	0	0	0	0	0	0	7.123132752	7.146378401	7.175742168	0	0	0
133719_bclustnum_66_kamer_1_number_1	0	0	0	0	0	0	1.533929576	1.335001067	0	6.009866684	6.859291661	6.717114009	0	1.098612289	1.098612289	0	0	0	2.81626464	3.068052935	2.754571126	0	0	1.435084525	0	0	0	1.098612289	0	0
133823_bclustnum_26_kamer_1_number_1	6.501867582	6.434793679	6.448767551	0	0	0	0	0	0	0	0	0	0	0	0	0	0	0	0	0	0	0	0	0	0	0	0	0	0	0
133936_bclustnum_56_kamer_1_number_1	6.515823185	6.49945315	6.494509984	5.584435717	5.535363823	5.574053368	0	1.098612289	1.098612289	1.757857918	1.609437912	1.098612289	0	0	0	0	0	0	1.098612289	0	0	0	0	0	1.945910149	0	0	0	0	0
134230_bclustnum_13_kamer_1_number_1	0	0	0	0	0	0	1.098612289	1.236761337	0	6.474748353	7.260677189	7.243670217	1.098612289	0	1.435084525	3.382503739	3.012259936	2.92077163	1.526056303	1.098612289	0	4.383414421	4.437409306	4.465908119	1.098612289	1.609437912	1.098612289	4.332194115	4.299550865	4.09988419
134994_bclustnum_47_kamer_1_number_1	0	0	0	0	0	0	3.07577652	2.356652735	2.944438979	6.20899236	6.820452951	6.781738438	5.707774496	5.662265794	5.65248918	1.446918983	1.85629799	1.435084525	4.601162165	5.086361005	4.844187086	1.098612289	1.098612289	0	0	0	0	1.568615918	2.079441542	2.261763098
135129_bclustnum_37_kamer_3_number_2	0	0	0	0	0	0	0	0	0	5.903023967	6.608000625	6.606070288	0	0	0	0	0	0	0	0	0	0	0	0	0	0	0	0	0	0
135187_bclustnum_16_kamer_1_number_1	6.624823241	6.58222318	6.664591402	0	0	0	0	0	0	0	0	0	0	0	0	0	1.757857918	1.098612289	0	0	0	0	0	0	0	0	0	0	0	0
135256_bclustnum_28_kamer_9_number_2	0	1.098612289	0	1.098612289	0	0	0	1.098612289	0	6.672876893	7.761574685	7.75850432	6.115892125	6.163314804	6.270232002	1.098612289	1.098612289	0	0	0	0	1.098612289	1.098612289	0	0	0	0	4.759323723	4.914124394	4.789157022
135318_bclustnum_27_kamer_1_number_1	1.098612289	1.098612289	0	0	0	0	0	0	0	0	0	0	0	0	0	0	0	0	0	0	0	0	0	0	6.475713109	6.546524258	6.459334652	0	0	0
136479_bclustnum_22_kamer_1_number_1	6.56510862	6.54550913	6.496440092	0	0	0	0	0	0	0	0	0	0	0	0	0	0	0	0	0	0	0	0	0	0	1.098612289	0	0	0	0
13659_bclustnum_240_kamer_1_number_1	0	0	1.098612289	0	0	0	0	0	0	0	0	0	0	0	0	0	0	0	0	0	0	0	0	0	6.668228248	6.719147203	6.763500308	0	0	0
136644_bclustnum_317_kamer_3_number_2	0	0	1.609437912	0	0	0	0	0	0	0	0	0	0	0	0	0	0	0	0	0	0	0	0	0	6.941190055	6.915971434	6.866933284	0	0	0
136702_bclustnum_131_kamer_3_number_2	0	0	0	6.999814726	6.934679546	6.80627611	0	0	0	0	0	0	0	0	0	0	0	0	0	0	0	0	0	0	0	0	0	0	0	0
13678_bclustnum_1108_kamer_2_number_2	0	0	0	0	0	0	0	0	1.098612289	6.156449184	6.860401583	6.879355804	0	0	0	1.098612289	1.540445755	0	0	0	1.609437912	0	0	0	0	0	0	0	0	0
1369_bclustnum_3032_kamer_1_number_1	1.098612289	1.098612289	0	0	0	0	0	0	0	0	0	0	0	0	0	0	0	0	0	0	0	0	0	0	6.728030348	6.715383386	6.764462109	0	1.098612289	1.845826164
137382_bclustnum_344_kamer_1_number_1	0	0	0	0	0	0	0	0	0	0	0	0	6.516932448	6.369330615	6.482342533	0	0	0	0	0	0	0	0	0	0	0	0	1.734601644	2.377486607	2.530166781
137497_bclustnum_125_kamer_2_number_2	0	0	0	6.42394315	6.452725382	6.518093636	0	0	1.098612289	1.098612289	1.098612289	0	0	0	0	0	0	0	0	0	0	0	0	0	0	0	0	0	0	0
137610_bclustnum_26_kamer_1_number_1	1.098612289	0	0	1.098612289	1.189582763	0	0	1.098612289	0	6.572282543	6.640995468	6.23636959	0	0	0	0	0	0	0	0	0	0	0	0	0	0	0	0	0	0
137657_bclustnum_37_kamer_1_number_1	6.896694332	6.816954915	6.803727209	0	0	0	0	1.098612289	0	0	0	0	1.098612289	0	0	0	0	0	0	0	0	0	0	1.098612289	0	0	0	0	0	0
137727_bclustnum_100_kamer_1_number_1	0	0	0	0	0	0	0	0	0	5.824030618	6.519638318	6.480555168	0	0	1.098612289	1.098612289	0	0	0	0	0	1.098612289	0	0	0	0	0	0	0	0
13772_bclustnum_34_kamer_1_number_1	0	0	0	6.715652441	6.723163948	6.673578586	0	0	0	1.098612289	0	0	0	0	0	0	0	0	0	0	1.098612289	0	0	0	0	0	0	0	0	0
13811_bclustnum_179_kamer_2_number_2	0	0	0	6.711566414	6.597924389	6.724347933	0	0	0	0	0	0	0	0	0	0	0	0	0	0	0	0	0	0	0	0	0	0	0	0
138421_bclustnum_213_kamer_1_number_1	0	0	0	0	0	0	1.609437912	2.751537441	2.335374593	6.772263108	6.165117389	6.267200549	5.848275238	5.662012114	5.745621552	1.098612289	0	1.098612289	2.913903806	3.122994682	3.734261436	0	0	0	0	0	0	0	0	0
1384_bclustnum_1997_kamer_1_number_1	6.659720752	6.593500595	6.637839776	6.176328702	6.151549016	6.188719871	0	1.098612289	1.098612289	1.098612289	0	0	1.413693065	1.35812377	1.098612289	0	0	0	1.098612289	1.609437912	1.945910149	1.824549292	1.098612289	1.098612289	0	0	0	4.826536158	4.799453251	5.088281286
138504_bclustnum_94_kamer_1_number_1	6.828712072	6.707106805	6.688852722	1.568615918	2.219203484	0	0	0	0	0	0	0	0	0	0	0	0	0	0	0	0	0	0	0	0	0	0	0	0	0
13853_bclustnum_32_kamer_1_number_1	1.540445755	1.734601644	1.4663363	1.098612289	0	0	3.33544568	3.036552668	3.830615534	4.823381594	6.858039687	6.73201164	2.197224577	1.832581464	2.397895273	0	1.098612289	1.098612289	1.836211667	1.845826164	3.149881525	1.540445755	1.413693065	0	0	1.098612289	0	1.098612289	1.098612289	1.098612289
13896_bclustnum_226_kamer_1_number_1	1.098612289	0	0	0	0	0	5.229920746	5.350805447	5.383985759	6.017680389	6.802871316	6.755768922	5.632404618	5.40617576	5.468996412	3.26660638	4.068075875	3.821369367	6.198027395	6.20366039	6.26106793	5.072043922	4.613882127	4.825309228	0	0	0	4.588362729	4.608497644	4.738143923
13905_bclustnum_1521_kamer_1_number_1	1.098612289	0	0	0	1.098612289	0	0	2.140066163	1.098612289	1.098612289	1.299283893	2.079441542	0	1.098612289	0	1.540445755	2.1690537	2.277267285	1.897120485	1.609437912	2.335374593	1.945910149	2.120263136	2.1102132	6.558197803	6.433118533	6.485312869	0	0	0
139069_bclustnum_160_kamer_9_number_2	0	0	0	6.640995468	6.65544035	6.684075334	0	0	0	0	0	0	0	0	0	0	0	0	0	0	0	0	0	0	0	0	0	0	0	0
139446_bclustnum_25_kamer_1_number_1	6.644050116	6.638829535	6.592496439	0	0	0	0	0	0	0	0	0	0	0	0	0	0	0	0	0	0	0	1.098612289	0	0	0	0	0	0	0
139603_bclustnum_33_kamer_1_number_1	0	0	0	0	0	0	0	1.098612289	1.098612289	6.492023145	6.811086877	6.857213281	0	0	1.481604541	1.098612289	1.098612289	1.098612289	1.098612289	0	1.516348465	0	1.098612289	1.098612289	0	0	0	0	0	1.098612289
139901_bclustnum_23_kamer_1_number_1	0	0	0	0	0	0	6.43279378	6.50197262	6.392221925	5.570769043	5.891392799	5.772007941	0	0	0	0	0	0	6.809139743	6.613384218	6.788050147	0	0	0	0	0	0	0	0	0
139932_bclustnum_86_kamer_1_number_1	0	0	0	0	0	0	0	0	0	6.937508237	7.370734293	7.237921963	1.098612289	0	1.098612289	0	0	0	1.098612289	1.526056303	0	0	0	0	0	0	0	0	0	0
14004_bclustnum_1988_kamer_1_number_1	0	0	0	6.54550913	6.628776556	6.577552548	0	0	0	0	0	0	0	0	0	0	0	0	0	0	1.098612289	0	0	0	0	0	0	0	0	0
14012_bclustnum_3486_kamer_1_number_1	6.56948142	6.465453973	6.474061978	0	0	1.098612289	0	0	0	0	0	0	0	0	0	0	0	0	0	0	0	0	0	0	0	0	0	0	0	0
140335_bclustnum_113_kamer_1_number_1	0	0	0	0	0	0	0	1.252762968	1.098612289	5.847882819	6.721626885	6.809039306	1.098612289	1.098612289	0	0	2.014903021	1.99242971	0	0	0	1.645156346	1.098612289	0	0	0	0	0	0	0
140707_bclustnum_888_kamer_1_number_1	1.098612289	1.749199855	1.609437912	0	0	0	0	0	0	1.098612289	0	0	0	0	0	1.36330461	1.446918983	1.098612289	0	0	0	2.164964207	0	0	6.942581736	6.974478911	6.940435418	0	0	0
140790_bclustnum_43_kamer_1_number_1	0	0	0	0	0	0	6.690132709	6.692615859	6.668228248	1.098612289	0	0	1.098612289	2.079441542	1.203971804	0	0	0	7.955323365	7.735542612	7.667275235	1.609437912	0	1.098612289	0	0	0	0	0	0
141011_bclustnum_62_kamer_1_number_1	5.081404365	4.978704214	4.71722127	4.819127674	4.823735272	4.835146342	4.32129021	4.217404023	4.42911416	6.075346031	6.613768037	6.507064257	5.043425117	5.068904202	4.940620472	3.897633978	4.022796644	3.885972621	3.337295103	3.533686565	3.926207922	4.701779522	4.752356672	4.7069503	0	0	0	3.909160914	4.022796644	4.221606971
141250_bclustnum_71_kamer_1_number_1	0	1.098612289	1.098612289	0	0	0	0	0	0	0	0	0	0	0	0	0	0	0	0	0	0	0	0	1.098612289	6.783073753	6.744320636	6.895570343	0	0	0
14161_bclustnum_114_kamer_1_number_1	1.845826164	1.945910149	1.887069649	0	0	0	0	0	0	0	0	0	0	0	0	0	0	0	0	0	0	0	0	0	7.203159955	7.161963295	7.063715749	0	0	0
142048_bclustnum_74_kamer_1_number_1	0	0	0	0	0	0	1.098612289	1.098612289	1.098612289	6.700184835	7.113598031	7.115582126	0	1.098612289	0	0	1.098612289	0	0	0	0	1.098612289	0	0	0	0	0	4.769743504	4.601831619	4.377851682
142091_bclustnum_32_kamer_1_number_1	6.93936053	6.973233983	7.023758955	0	0	0	0	0	0	0	0	0	0	0	0	0	0	0	0	0	0	0	0	0	0	0	0	0	0	0
1422_bclustnum_162_kamer_1_number_1	0	0	0	0	0	0	0	0	0	6.465477317	6.966967139	6.966109089	0	0	0	0	0	0	1.098612289	0	0	0	0	0	0	0	0	0	0	0
142341_bclustnum_255_kamer_1_number_1	0	0	0	0	0	0	4.23892531	4.054679884	3.753418757	4.853146828	6.670403771	6.561637271	5.416100402	5.273732623	5.340859481	1.860752118	2.114532344	1.504077397	3.667219052	3.224575551	2.926741188	4.447680939	4.810825709	4.577878123	4.829457083	5.589743671	4.833635551	4.25053459	4.137830206	4.373657965
142_bclustnum_841_kamer_1_number_1	6.013715156	6.146329258	6.120297419	6.548423953	6.525239313	6.51089653	0	0	0	0	0	0	0	0	0	0	0	0	0	0	0	0	0	0	0	0	0	0	0	0
143987_bclustnum_45_kamer_7_number_2	0	0	0	6.712262157	6.720220155	6.683718829	1.098612289	1.609437912	0	1.098612289	1.098612289	1.504077397	0	0	0	0	0	0	1.098612289	0	1.098612289	0	0	0	0	0	0	0	1.098612289	1.098612289
14477_bclustnum_5158_kamer_1_number_1	0	0	0	0	0	0	3.680512045	3.752708349	3.501546361	6.619150114	7.468027994	7.480512905	0	0	0	0	0	0	1.85629799	1.452252967	2.533696814	0	0	1.098612289	0	0	0	0	0	0
144910_bclustnum_28_kamer_1_number_1	0	0	0	0	0	0	4.177459469	4.007333185	5.236441963	6.830334132	5.752572639	6.52649486	0	0	0	0	0	0	5.859360706	5.666426688	5.873525249	0	0	0	0	0	0	0	0	0
145035_bclustnum_120_kamer_1_number_1	6.615529566	6.616065185	6.319996414	0	0	0	0	0	0	0	0	0	0	0	0	0	0	0	0	0	0	0	0	0	0	0	0	0	0	0
145681_bclustnum_20_kamer_1_number_1	6.510423505	6.553141067	6.635800876	0	0	0	1.098612289	0	0	1.098612289	1.504077397	1.098612289	0	0	0	0	0	0	0	0	0	1.098612289	0	0	0	0	0	0	0	0
14580_bclustnum_1538_kamer_1_number_1	6.560464735	6.616065185	6.584515111	1.909542505	0	1.558144618	0	0	0	0	0	0	0	0	0	0	0	0	0	0	0	0	0	0	0	0	0	0	0	0
145822_bclustnum_25_kamer_1_number_1	6.457397402	6.582579002	6.513230111	0	0	0	1.098612289	0	0	0	0	0	0	0	0	0	0	0	0	0	0	0	0	0	0	0	0	0	0	0
146252_bclustnum_110_kamer_1_number_1	0	0	0	6.633756495	6.696623052	6.705639095	0	0	0	0	0	0	0	0	0	1.504077397	1.609437912	0	0	0	0	1.098612289	1.904238091	1.609437912	0	0	0	0	0	0
146572_bclustnum_35_kamer_1_number_1	1.516348465	2.335374593	1.609437912	0	0	0	0	0	0	0	0	0	0	0	0	0	0	0	0	0	0	0	0	0	6.837430449	6.871939483	6.872881186	0	0	0
146772_bclustnum_25_kamer_1_number_1	0	0	0	0	0	0	5.637464594	5.675040006	5.578785984	6.57144303	6.612041035	6.517301928	0	0	0	4.510859507	3.886705197	4.047427642	6.26435019	6.025865974	5.878295849	5.178970609	5.089138356	5.023880521	1.945910149	2.313634819	1.880313545	4.670489652	4.590056548	4.391357962
1467_bclustnum_232_kamer_1_number_1	0	0	0	6.403574198	6.538139824	6.412146621	0	0	0	0	0	0	1.098612289	0	0	0	0	0	0	0	0	0	0	0	0	0	0	0	0	0
146909_bclustnum_74_kamer_1_number_1	0	0	0	0	0	0	0	1.609437912	1.609437912	6.556494225	7.027314514	7.016609684	5.971771914	6.073505257	5.935423156	0	0	0	0	0	1.098612289	1.098612289	1.098612289	0	2.542727344	2.233591864	2.079441542	1.098612289	0	1.098612289
146975_bclustnum_0_kamer_1_number_1	0	0	1.098612289	0	0	0	0	0	0	0	0	0	0	0	0	0	0	0	0	0	0	0	0	0	6.359862754	6.83876205	6.231136745	0	0	0
147568_bclustnum_1_kamer_1_number_1	0	0	0	0	0	0	6.337218574	6.363219465	6.428912701	6.383319117	6.335251041	6.440148774	3.923073721	3.652101355	4.230881018	6.762035625	6.59468702	6.525615996	6.91494934	6.79481052	6.720461381	6.820671172	6.794138552	6.858775097	0	0	0	1.845826164	1.386294361	1.4663363
14756_bclustnum_4054_kamer_1_number_1	0	0	0	0	0	0	0	1.386294361	0	6.222576268	6.800912554	6.64509097	6.501289671	6.381331975	6.456769656	4.757891273	4.906511051	4.730330388	0	0	1.098612289	5.610518866	5.43153621	5.490708884	0	0	0	3.944813473	3.871201011	4.071872275
14783_bclustnum_476_kamer_1_number_1	6.654410219	6.457910292	6.671526488	0	0	0	0	0	1.098612289	0	0	0	0	1.887069649	1.098612289	0	0	1.386294361	0	1.098612289	1.098612289	1.609437912	0	0	0	0	0	6.262763776	6.32853125	6.188264123
148303_bclustnum_94_kamer_1_number_1	6.488021861	6.599870499	6.531687795	0	0	0	0	0	0	0	0	0	0	0	0	0	0	0	0	0	0	0	0	0	0	1.098612289	0	0	0	0
1486_bclustnum_1493_kamer_1_number_1	1.435084525	1.832581464	1.098612289	0	0	0	0	0	0	0	0	0	0	0	0	0	0	0	0	0	0	0	0	0	7.114549912	7.176460933	7.147991908	0	0	0
14884_bclustnum_302_kamer_1_number_1	6.667974087	6.75133536	6.801283034	1.098612289	0	0	0	0	0	0	0	0	0	0	0	0	0	0	0	0	0	0	0	0	0	0	0	0	0	0
148948_bclustnum_48_kamer_1_number_1	0	0	0	0	0	0	3.282278701	3.204225024	3.247552685	5.551990123	6.532110104	6.383376559	0	0	0	0	0	0	1.098612289	0	0	0	1.098612289	0	0	0	0	0	0	0
14907_bclustnum_65_kamer_1_number_1	0	1.098612289	1.386294361	0	1.098612289	0	0	0	0	6.694066886	6.739809888	6.839476438	0	0	1.098612289	0	0	0	1.098612289	0	1.098612289	0	0	0	0	0	0	0	0	0
14947_bclustnum_576_kamer_1_number_1	0	0	0	0	0	0	0	0	0	6.899521474	6.929516771	6.908754779	0	0	0	1.098612289	1.098612289	1.098612289	0	0	0	0	0	0	0	0	0	0	0	0
14970_bclustnum_4367_kamer_1_number_1	6.454884048	6.480044562	6.521274817	5.904151306	5.741078259	5.999556717	0	0	0	0	0	0	0	0	0	1.098612289	1.098612289	0	0	1.098612289	1.098612289	0	0	0	0	0	0	3.800293361	3.837915649	3.650658241
149998_bclustnum_21_kamer_1_number_1	0	0	0	6.600777571	6.607700985	6.58953702	0	0	0	0	0	0	0	0	0	0	0	0	0	0	0	0	0	0	0	0	0	0	0	0
151104_bclustnum_10_kamer_1_number_1	0	0	1.098612289	0	0	0	5.255759491	5.263379071	5.198497031	7.064699197	7.115687726	7.146402032	5.549076085	5.583496309	5.556828062	4.863935675	4.691347882	4.94212088	5.610449339	5.899165579	5.74875584	5.174408104	5.197706664	5.090474904	0	0	0	4.973051108	5.136192477	4.850466542
151337_bclustnum_76_kamer_1_number_1	1.098612289	1.860752118	0	0	0	0	0	1.098612289	0	0	0	1.609437912	0	0	0	0	1.098612289	0	0	0	0	0	0	0	6.665683718	6.71082757	6.663771062	0	0	0
151350_bclustnum_27_kamer_1_number_1	2.164964207	1.098612289	1.550598322	3.680512045	3.36729583	3.433987204	0	1.098612289	0	2.261763098	1.098612289	0	0	0	0	0	0	1.609437912	1.098612289	0	0	0	0	1.098612289	6.692969206	6.702487254	6.725376921	0	0	1.098612289
151664_bclustnum_21_kamer_1_number_1	0	0	0	0	0	0	1.452252967	1.645156346	2.256064601	6.575540168	7.202795216	7.124260848	1.098612289	0	0	4.315061171	3.863357833	3.842136878	6.265474202	6.482968198	6.226356811	5.272065789	5.101529678	4.87241483	0	0	0	5.233053249	5.404724834	5.146965267
152751_bclustnum_75_kamer_1_number_1	0	0	0	0	0	0	5.485982952	5.414828483	5.413559399	5.958424693	6.09228	5.961373828	6.533996665	6.545555099	6.495913382	5.091994058	4.795790546	4.844187086	5.650146086	5.862411682	5.908082938	5.786897381	5.591401074	5.65248918	1.098612289	0	1.098612289	5.267120774	5.318820729	5.385150811
15276_bclustnum_305_kamer_1_number_1	0	0	0	1.540445755	1.880313545	0	0	0	0	0	0	0	0	0	0	5.825262372	5.426050733	5.509388337	0	0	1.098612289	6.543192162	6.607325634	6.616399801	0	0	0	0	0	0
1528_bclustnum_1009_kamer_1_number_1	0	0	0	6.863106179	6.888346134	6.830273622	0	0	0	0	0	0	0	0	0	0	0	0	0	0	0	0	0	0	0	0	0	0	0	0
1528_bclustnum_392_kamer_1_number_1	0	0	0	0	0	0	5.274465151	4.651576559	5.005863929	6.53051313	6.254003796	6.259929396	0	0	0	2.140066163	1.098612289	0	5.74779936	5.611301622	5.818387131	0	0	0	0	0	0	0	1.098612289	0
153116_bclustnum_70_kamer_1_number_1	5.791793352	5.831882477	5.665041646	6.561030666	6.501289671	6.444131257	0	0	1.098612289	1.098612289	0	0	1.098612289	0	0	0	1.098612289	0	1.098612289	1.098612289	0	1.098612289	0	1.098612289	1.098612289	1.098612289	0	0	0	1.098612289
153850_bclustnum_72_kamer_2_number_2	0	0	0	0	0	0	0	0	0	6.11146734	7.052201883	7.1278542	0	1.098612289	0	0	0	0	0	0	0	0	1.824549292	0	0	0	0	0	0	0
153890_bclustnum_41_kamer_1_number_1	0	0	0	6.410174882	6.484635236	6.533996665	0	0	0	0	0	0	0	0	0	0	1.609437912	0	0	0	0	1.609437912	1.098612289	1.098612289	0	0	0	1.098612289	0	0
15399_bclustnum_312_kamer_1_number_1	6.533498098	6.56272654	6.563855527	4.611152258	4.98223582	4.734442522	0	0	0	0	0	0	0	0	0	0	0	0	0	0	0	0	0	0	0	0	0	0	0	0
154952_bclustnum_134_kamer_1_number_1	0	0	0	0	0	1.4663363	0	0	0	0	0	0	0	0	0	0	0	0	0	0	0	0	0	0	6.581332378	6.593044534	6.595780514	1.098612289	1.098612289	0
155385_bclustnum_4_kamer_2_number_2	0	1.098612289	0	0	0	0	0	1.609437912	1.4663363	6.899387365	6.583409222	6.549241503	0	0	0	0	0	0	2.335374593	1.845826164	1.540445755	0	0	0	0	0	0	0	0	0
156505_bclustnum_100_kamer_1_number_1	6.594868896	6.415564935	6.582948535	0	1.098612289	0	0	0	0	1.609437912	0	0	0	0	0	0	0	0	0	0	0	0	1.098612289	0	0	0	0	0	0	0
156586_bclustnum_0_kamer_1_number_1	0	0	0	0	0	0	0	0	0	0	0	0	7.031838427	7.044320814	7.003774298	0	0	0	0	0	0	0	0	0	0	0	0	0	0	0
157073_bclustnum_19_kamer_1_number_1	0	0	1.098612289	0	0	0	0	0	0	0	0	0	0	0	0	0	0	0	0	0	0	0	0	0	6.449033371	6.402218975	6.503879407	0	0	0
157102_bclustnum_127_kamer_1_number_1	1.4663363	0	0	0	0	0	0	0	0	0	0	0	0	0	0	0	0	0	0	0	1.098612289	1.098612289	0	0	6.818924065	6.779353564	6.826183987	0	0	0
157321_bclustnum_61_kamer_1_number_1	6.613086187	6.627600803	6.618442544	0	0	0	0	0	0	0	0	0	0	0	0	0	0	0	0	0	0	0	0	0	0	0	0	0	0	0
15760_bclustnum_4374_kamer_1_number_1	0	0	0	6.427297192	6.377152028	6.509514016	0	0	0	0	0	0	0	0	0	0	0	0	0	0	0	0	0	0	1.824549292	1.609437912	2.104134154	0	0	0
158020_bclustnum_28_kamer_1_number_1	6.572282543	6.641965153	6.527957918	0	0	0	0	0	0	1.098612289	0	0	0	0	0	0	0	0	0	0	0	0	0	0	0	0	0	0	0	1.098612289
158329_bclustnum_188_kamer_8_number_2	6.468215673	6.448362357	6.577861358	0	0	0	0	0	0	0	0	0	0	0	0	0	0	0	0	0	0	0	0	0	0	0	0	0	0	0
15840_bclustnum_75_kamer_1_number_1	0	0	0	0	0	0	0	0	0	6.447305863	6.977281342	6.926253134	0	0	0	0	0	0	0	0	0	0	0	0	0	0	0	1.098612289	1.098612289	1.098612289
158522_bclustnum_32_kamer_1_number_1	6.492239835	6.54448722	6.557914075	4.672828834	4.875197323	4.753590191	0	0	0	0	0	1.098612289	1.098612289	0	0	1.540445755	1.098612289	1.446918983	0	0	0	1.386294361	0	1.098612289	0	0	0	0	0	0
159400_bclustnum_23_kamer_1_number_1	6.706687505	6.635758874	6.761076118	6.696416773	6.667274808	6.703494815	0	0	0	0	0	0	0	0	0	0	0	1.098612289	0	0	0	0	0	0	0	0	0	0	0	0
159730_bclustnum_59_kamer_1_number_1	0	0	0	0	0	0	2.397895273	1.757857918	1.609437912	6.892172496	6.254568922	6.182562066	2.197224577	1.945910149	1.578184575	0	0	1.098612289	0	1.098612289	1.098612289	0	1.098612289	1.098612289	1.098612289	0	0	0	0	0
159743_bclustnum_15_kamer_1_number_1	1.098612289	0	0	0	0	0	2.854376061	2.833213344	2.833213344	4.192177315	6.694149845	6.563421017	3.898599309	3.8534146	3.791736088	0	1.098612289	0	0	0	1.572396263	3.422188844	2.953961913	3.212185494	0	0	0	1.945910149	3.462891236	3.044522438
159811_bclustnum_21_kamer_1_number_1	0	0	0	0	0	0	0	0	1.609437912	6.383265052	6.448889394	6.660148682	0	0	0	0	0	0	4.248495242	5.032612027	4.525404857	0	0	0	0	0	0	2.512302921	2.908719078	1.673975809
159926_bclustnum_46_kamer_1_number_1	5.890538629	5.886104031	5.964607093	6.82632828	6.807492857	6.745706827	0	0	0	0	0	0	0	0	0	0	0	0	0	0	0	0	0	0	0	0	0	0	0	0
16025_bclustnum_412_kamer_1_number_1	0	0	0	6.45267967	6.541029999	6.445084697	1.609437912	2.251291799	1.609437912	0	0	0	0	0	0	0	0	0	1.098612289	1.098612289	1.609437912	0	0	0	0	1.098612289	0	0	0	0
160287_bclustnum_10_kamer_2_number_2	4.786299366	4.98066394	4.747415998	5.323009979	5.086713229	5.171296165	4.662089127	4.930357559	4.691347882	6.445492809	6.81360173	6.785910757	5.732415282	5.678221902	5.612606072	5.112848863	4.802848226	4.65396035	6.002476196	5.960636715	5.852613315	5.385150811	5.627106593	5.563424021	1.860752118	0	1.098612289	4.686095581	4.571761272	4.648507415
1602_bclustnum_1443_kamer_1_number_1	0	0	0	1.098612289	0	0	1.098612289	0	0	6.206239176	6.766319587	6.818438702	0	0	0	0	0	0	0	0	0	0	0	0	0	0	0	0	0	0
1602_bclustnum_6878_kamer_1_number_1	0	0	0	0	0	0	4.842216642	4.894101478	4.894101478	6.100070042	6.937071333	6.892387802	0	0	0	0	0	0	4.930870326	5.059425458	5.095282768	0	0	0	0	0	0	0	0	0
160419_bclustnum_26_kamer_1_number_1	0	0	0	0	0	0	4.40060302	4.363098625	4.457250056	6.678342115	7.270660773	7.307537604	0	1.098612289	0	2.48490665	2.788092909	2.803360381	3.392829132	3.248434627	3.020424886	2.525728644	2.931193752	3.135494216	0	0	0	0	0	0
16048_bclustnum_1936_kamer_1_number_1	0	0	0	0	0	0	0	0	0	6.254981993	6.428567202	6.70073111	0	0	0	0	0	0	0	0	0	0	0	0	0	0	0	1.098612289	0	0
160703_bclustnum_146_kamer_1_number_1	0	0	0	0	0	0	0	0	0	6.244166901	6.632660322	6.49941103	0	0	0	0	0	0	0	0	1.098612289	1.098612289	1.098612289	0	0	0	0	0	0	0
160805_bclustnum_148_kamer_1_number_1	1.098612289	0	1.558144618	0	0	0	1.609437912	1.098612289	1.4663363	6.89804125	6.489036224	6.535885476	2.475605192	2.146581364	1.609437912	1.810108426	1.098612289	1.4663363	1.550598322	0	0	2.079441542	1.098612289	2.313634819	0	0	0	0	0	0
161270_bclustnum_108_kamer_1_number_1	0	0	0	6.457624863	6.51174533	6.569736647	0	0	0	0	0	0	0	0	0	0	0	0	0	0	0	0	0	0	0	0	1.098612289	0	0	0
161388_bclustnum_208_kamer_14_number_2	1.098612289	0	0	0	0	0	0	0	0	0	0	0	0	0	0	0	0	0	0	0	0	0	0	0	6.70930434	6.576817698	6.722629795	0	0	0
161916_bclustnum_32_kamer_1_number_1	6.537415973	5.751162121	5.774206766	0	0	0	0	0	0	0	0	0	0	0	0	0	0	0	0	0	0	0	0	0	5.654826797	5.751162121	5.637564322	0	0	0
162310_bclustnum_30_kamer_1_number_1	0	0	0	0	0	0	0	0	0	6.022842083	6.641834698	6.749638411	0	0	0	0	0	0	1.526056303	0	1.098612289	0	0	0	0	0	0	1.098612289	0	0
162482_bclustnum_16_kamer_1_number_1	0	0	0	0	0	0	4.640257368	4.45931864	4.432516544	6.163916728	6.377456274	6.51259341	0	0	0	2.929287938	2.520000268	1.985914895	1.098612289	1.098612289	0	4.115546537	4.225790866	4.143134726	0	0	0	0	0	0
162537_bclustnum_83_kamer_1_number_1	0	0	0	0	0	0	0	1.098612289	0	6.257815087	6.915723449	6.749094779	0	0	0	0	0	0	0	1.609437912	0	0	0	0	0	0	0	0	0	0
163186_bclustnum_18_kamer_1_number_1	0	1.098612289	1.098612289	0	0	0	0	1.098612289	1.098612289	4.857421953	6.517671273	6.51174533	1.098612289	0	1.098612289	0	1.098612289	1.098612289	1.609437912	0	1.778856584	1.098612289	1.285196968	1.098612289	1.435084525	1.098612289	1.609437912	0	0	0
163413_bclustnum_183_kamer_1_number_1	1.609437912	0	0	0	0	0	0	0	0	0	0	0	0	0	0	0	0	0	0	0	0	1.098612289	0	0	7.074455455	7.10019217	7.119150083	0	0	0
163707_bclustnum_66_kamer_1_number_1	1.098612289	0	0	0	0	0	0	0	0	0	0	0	0	0	0	7.370721705	7.092207897	7.163342787	0	0	0	7.418030751	7.297917222	7.263953109	0	0	0	0	0	0
163834_bclustnum_68_kamer_35_number_2	0	0	0	0	0	0	0	0	0	6.921164966	7.36264527	7.374942446	0	0	0	0	0	0	0	0	0	0	0	0	0	0	0	0	0	0
164001_bclustnum_4_kamer_1_number_1	0	0	0	0	0	0	0	0	0	6.763653935	7.089743447	7.023046323	0	0	0	0	0	0	0	1.098612289	1.098612289	0	1.098612289	0	0	0	0	0	0	0
16409_bclustnum_7599_kamer_1_number_1	6.597924389	6.632378518	6.686930288	2.140066163	2.862200881	2.674148649	0	0	1.098612289	1.76766143	0	0	0	1.098612289	1.609437912	3.396422668	2.671005785	3.511545439	0	0	0	1.945910149	2.197224577	2.1102132	0	0	0	0	0	1.098612289
16425_bclustnum_52_kamer_1_number_1	1.824549292	2.430415264	1.098612289	0	0	0	0	0	0	0	0	0	0	0	0	0	0	0	0	0	0	0	0	0	7.036306793	6.992179145	7.088333651	0	0	0
164328_bclustnum_110_kamer_1_number_1	0	0	0	6.513230111	6.597599896	6.588926478	0	0	0	0	0	0	2.653241965	2.104134154	1.99242971	0	0	0	0	0	0	0	0	0	0	0	0	0	0	0
16476_bclustnum_142_kamer_1_number_1	0	0	0	0	0	0	2.708050201	2.427745295	3.184975653	6.136493032	6.512982306	6.408528791	1.098612289	0	1.098612289	1.098612289	2.730026934	1.609437912	3.578877629	3.688879454	3.688879454	1.871802177	2.197224577	2.693126055	0	0	0	0	0	0
16481_bclustnum_689_kamer_1_number_1	0	0	0	0	0	0	4.185859671	4.114963849	4.164077382	6.555988271	6.758384822	6.541670487	0	0	0	0	0	1.098612289	2.079441542	2.251291799	1.558144618	0	0	0	0	0	0	0	1.098612289	0
164879_bclustnum_34_kamer_1_number_1	6.559817767	6.538139824	6.445946778	0	0	0	0	0	0	0	0	0	0	0	0	0	0	0	0	1.098612289	1.098612289	0	0	0	0	0	0	0	0	0
16488_bclustnum_267_kamer_1_number_1	1.609437912	0	1.694594904	0	0	0	0	0	0	0	0	0	0	0	0	0	0	0	0	0	1.098612289	0	0	0	6.665683718	6.613384218	6.606200085	0	0	0
16505_bclustnum_2590_kamer_1_number_1	6.939796435	6.950920127	6.920671504	0	0	0	0	0	0	0	0	0	0	0	0	0	0	0	0	0	0	0	0	0	0	0	0	0	0	0
1650_bclustnum_5382_kamer_1_number_1	6.469250317	6.448097942	6.550365794	6.038825118	6.235390638	6.105908681	1.098612289	1.098612289	0	0	0	0	0	0	0	0	0	0	0	0	0	0	0	0	0	0	0	0	0	0
165241_bclustnum_223_kamer_15_number_2	0	0	0	0	0	0	0	0	0	6.779921907	6.576005673	6.489204931	1.098612289	0	0	0	0	0	0	0	0	0	0	0	0	0	0	0	0	0
165441_bclustnum_28_kamer_79_number_3	0	0	0	6.926017505	6.812345094	6.896694332	0	0	0	0	0	0	0	0	0	0	0	0	0	0	0	0	0	0	0	0	0	0	0	0
16612_bclustnum_469_kamer_1_number_1	0	0	0	6.685027891	6.635216631	6.663132696	0	0	0	0	0	0	0	0	0	0	0	0	0	0	0	0	0	0	0	0	0	0	0	0
16713_bclustnum_1636_kamer_1_number_1	6.738448659	6.736966958	6.749931194	0	0	0	0	0	0	0	0	0	0	0	0	0	0	0	0	0	0	0	0	0	0	0	0	1.734601644	1.871802177	1.563976003
167401_bclustnum_225_kamer_1_number_1	0	0	0	6.509762682	6.566984617	6.496105083	0	0	0	0	0	0	0	0	0	0	0	0	0	0	0	0	0	0	0	0	0	0	0	0
16747_bclustnum_353_kamer_26_number_3	0	0	0	0	0	0	0	0	0	0	0	0	0	0	0	0	0	0	0	0	0	0	0	0	6.674561392	6.695798917	6.645957954	0	0	0
16753_bclustnum_166_kamer_1_number_1	0	0	0	0	0	0	0	0	0	0	0	0	0	0	0	0	0	0	0	0	0	0	0	0	6.902296406	6.794586581	6.735911835	0	0	0
16756_bclustnum_637_kamer_1_number_1	0	0	0	0	1.098612289	1.098612289	6.871506146	6.901133403	6.930103683	5.722496274	6.234193055	6.2591569	0	0	0	0	0	0	6.149749526	6.571163035	6.429074109	1.098612289	0	0	0	0	1.098612289	0	0	0
16760_bclustnum_650_kamer_1_number_1	7.555732485	7.349417302	7.557645211	1.504077397	1.871802177	2.140066163	0	1.098612289	0	0	0	0	0	0	0	0	0	0	0	0	0	0	0	0	0	0	0	0	0	0
167617_bclustnum_96_kamer_1_number_1	6.439669809	6.528250273	6.219927923	0	0	0	1.098612289	1.098612289	0	2.140066163	1.098612289	0	0	1.945910149	1.098612289	0	0	0	0	0	0	0	0	0	1.098612289	0	1.098612289	0	1.098612289	0
167617_bclustnum_96_kamer_4_number_2	6.703188113	6.670259221	6.673803529	4.599152114	4.497584975	4.384523515	0	0	0	0	0	0	0	0	0	0	0	0	0	0	0	0	0	0	0	0	0	0	0	0
16768_bclustnum_206_kamer_4_number_2	1.609437912	0	0	0	0	0	0	0	0	0	0	0	0	0	0	0	0	0	0	0	0	0	0	0	6.419994928	6.59245669	6.410585982	0	0	0
16806_bclustnum_1037_kamer_1_number_1	6.779543427	6.761572769	6.822015457	1.526056303	1.35812377	1.35812377	0	0	0	0	0	0	0	0	0	0	0	0	0	0	0	0	0	0	0	0	0	0	0	0
16852_bclustnum_75_kamer_1_number_1	0	0	0	0	0	0	0	0	0	0	0	1.609437912	6.655836668	6.673297968	6.65959003	0	0	0	0	0	0	0	0	0	0	0	0	0	0	0
1690_bclustnum_1050_kamer_4_number_2	6.611593354	6.665683718	6.603039622	0	0	0	0	0	0	0	0	0	0	0	0	0	0	0	0	0	0	0	0	0	0	0	0	0	0	0
169156_bclustnum_100_kamer_1_number_1	0	0	0	0	0	0	0	1.098612289	0	1.845826164	0	0	0	0	0	5.515668172	5.38602142	5.397157672	0	0	1.098612289	6.562287302	6.548060064	6.532657384	0	0	0	5.478319569	5.474604084	5.581403896
16964_bclustnum_561_kamer_1_number_1	0	0	0	7.00880351	6.993932975	6.927557906	0	0	0	0	0	0	0	0	0	0	0	0	0	0	0	0	0	0	0	0	0	0	0	0
170105_bclustnum_46_kamer_1_number_1	6.549333095	6.635290172	6.543911846	6.198253081	6.228073038	6.184606518	0	0	0	1.098612289	0	0	4.548599834	4.583508251	4.390915759	0	0	0	0	0	0	1.098612289	0	0	0	0	0	3.357395257	3.571541944	3.618609875
170283_bclustnum_33_kamer_1_number_1	0	0	0	0	0	0	0	0	0	5.5579317	6.663861677	6.633882748	0	0	0	0	0	0	0	0	0	0	0	0	0	0	0	0	0	0
170667_bclustnum_33_kamer_1_number_1	7.13069881	7.096514403	7.135886372	0	0	0	0	0	0	0	0	0	0	0	0	0	0	0	0	0	0	0	0	0	0	0	0	0	0	0
17078_bclustnum_697_kamer_1_number_1	0	0	0	0	0	0	0	0	0	6.461988354	6.873163834	6.91274282	0	0	0	0	1.098612289	0	0	0	0	0	0	0	3.36729583	3.106078838	3.657847918	0	0	0
171300_bclustnum_45_kamer_1_number_1	0	0	0	0	0	0	4.770684624	4.812184355	4.525404857	5.840906157	6.690390001	6.552507887	0	0	1.098612289	0	0	0	1.098612289	1.791759469	1.804497989	0	0	0	0	0	0	0	0	0
1714_bclustnum_1769_kamer_1_number_1	1.609437912	0	0	0	0	1.098612289	1.550598322	0	1.098612289	6.325254619	6.887348469	6.826051609	0	1.098612289	0	0	0	0	0	0	0	0	0	0	0	0	0	0	0	0
171946_bclustnum_43_kamer_1_number_1	0	0	0	0	0	0	5.512085102	5.521904819	5.366494572	0	0	0	0	0	0	0	0	0	6.557251256	6.508769137	6.461988354	0	0	0	0	0	0	0	0	0
17202_bclustnum_509_kamer_1_number_1	6.833151338	6.831474486	6.730620647	6.754215912	6.731681365	6.741700695	0	0	1.098612289	1.749199855	1.098612289	1.098612289	0	0	0	0	1.446918983	0	0	0	1.098612289	1.098612289	1.832581464	0	1.098612289	1.098612289	1.098612289	1.098612289	1.098612289	0
17249_bclustnum_96_kamer_1_number_1	0	0	0	0	0	0	0	0	1.098612289	6.550921751	5.650930071	5.77687803	4.486136619	4.085041422	3.840647297	1.098612289	1.098612289	0	1.098612289	0	0	0	0	1.558144618	0	0	0	0	0	0
172506_bclustnum_26_kamer_1_number_1	6.764782889	6.820137536	6.68669331	0	0	0	0	0	0	0	0	0	0	0	0	0	0	0	0	0	0	0	0	0	0	0	0	0	0	0
172569_bclustnum_148_kamer_1_number_1	6.515453157	6.447305863	6.518409553	0	0	0	0	0	0	0	1.098612289	1.098612289	0	0	0	0	0	0	0	0	0	0	0	0	0	0	0	0	0	0
172569_bclustnum_148_kamer_2_number_2	6.592130418	6.631562946	6.589384419	0	0	0	0	0	0	0	0	0	0	0	0	0	0	0	0	0	0	0	0	0	0	0	0	0	0	0
17258_bclustnum_677_kamer_17_number_2	0	1.098612289	0	6.824529093	6.798099998	6.783001252	0	0	0	0	0	0	0	0	0	0	0	0	0	0	0	0	0	0	0	0	0	0	0	0
172813_bclustnum_306_kamer_1_number_1	1.098612289	0	1.609437912	0	0	0	4.819127674	5.174532607	5.058065804	6.263942876	6.763060088	6.694385063	0	0	0	0	0	0	5.361292166	5.383838884	4.879006852	0	0	0	1.526056303	1.757857918	1.609437912	0	0	0
172884_bclustnum_45_kamer_1_number_1	0	0	0	0	0	0	0	0	0	6.92591931	6.802764695	6.80596837	0	0	0	1.098612289	0	0	1.098612289	0	0	0	0	0	0	0	0	0	1.299283893	0
173190_bclustnum_8_kamer_1_number_1	0	0	0	0	0	0	0	0	0	0	0	0	7.405981867	7.503840747	7.465197277	0	0	0	0	0	0	0	0	0	0	0	0	0	0	0
17362_bclustnum_92_kamer_1_number_1	1.504077397	2.197224577	2.140066163	6.707351215	6.735384449	6.661087183	0	0	0	0	0	0	0	0	0	0	0	0	0	0	0	0	0	0	0	0	0	0	0	0
173685_bclustnum_3_kamer_1_number_1	0	0	0	0	0	0	0	0	0	6.605297921	7.168425802	7.048968342	0	0	0	0	0	0	0	0	0	0	0	0	0	0	0	0	0	0
173685_bclustnum_7_kamer_1_number_1	0	0	0	0	0	0	0	0	0	6.953684211	7.617105479	7.593207932	0	0	0	0	0	0	0	0	0	0	0	0	0	0	1.098612289	0	0	0
174029_bclustnum_193_kamer_1_number_1	6.87461206	6.860034543	6.957877888	0	1.098612289	0	0	0	0	0	0	0	0	0	0	0	0	0	0	0	0	0	0	0	0	0	0	0	0	0
17409_bclustnum_1146_kamer_6_number_2	0	0	1.446918983	0	0	0	0	0	0	0	0	0	0	0	0	0	0	0	0	0	0	0	0	0	6.797103009	6.802394763	6.848535919	0	0	0
17448_bclustnum_79_kamer_1_number_1	0	0	0	0	0	0	1.665006953	1.098612289	1.550598322	6.232448017	6.858354929	6.794138552	0	1.335001067	0	0	0	0	2.68881981	2.871681512	2.374905755	0	0	0	0	0	0	0	0	0
174759_bclustnum_291_kamer_10_number_2	0	0	0	0	0	0	0	0	1.098612289	6.683861446	6.616065185	6.600414569	0	1.098612289	0	0	0	0	1.435084525	1.609437912	1.824549292	0	0	0	0	0	0	0	0	0
175111_bclustnum_9_kamer_1_number_1	0	0	0	0	0	0	3.884995018	3.982792697	4.248495242	4.679990048	6.525762527	6.543192162	1.609437912	2.501435952	2.564949357	1.098612289	0	0	3.501157341	3.891820298	3.115224958	4.897160465	4.800284565	4.944887153	0	0	0	3.79854967	4.223509979	3.906554078
175456_bclustnum_111_kamer_1_number_1	0	0	0	0	0	0	0	0	0	6.502290671	6.612488515	6.616957692	0	0	0	0	0	0	0	1.098612289	1.098612289	0	0	0	0	0	0	0	0	1.098612289
1760_bclustnum_6511_kamer_1_number_1	0	0	0	0	0	1.098612289	2.351375257	1.609437912	1.791759469	1.704748092	0	0	6.611293444	6.645379614	6.521602972	0	0	0	3.548979252	3.961871657	3.826223258	0	0	0	0	0	0	0	0	0
17617_bclustnum_661_kamer_1_number_1	0	0	0	0	0	0	0	1.098612289	1.098612289	6.488698724	6.880384082	6.912075932	2.159484634	0	2.48490665	0	0	1.098612289	0	1.098612289	0	1.098612289	0	0	0	0	0	5.484796933	5.509388337	5.458167488
176222_bclustnum_37_kamer_1_number_1	0	0	0	0	0	0	0	0	0	6.625226572	7.451241685	7.465369064	1.540445755	1.488076733	1.098612289	0	0	0	0	0	0	0	0	0	0	0	0	2.00148	2.159484634	2.351375257
176481_bclustnum_56_kamer_1_number_1	0	0	0	4.023365792	3.828641396	4.337290741	0	2.501435952	0	6.128566433	6.65658384	6.619629108	4.340553386	4.297285406	4.151039906	0	0	0	2.876385516	2.852629507	3.125786377	1.098612289	0	0	0	0	0	2.417893959	2.944438979	2.944438979
176851_bclustnum_17_kamer_1_number_1	0	0	0	0	0	0	0	0	0	0	0	0	0	0	0	0	0	0	0	0	0	0	0	0	6.518744552	6.543127365	6.559744124	0	0	0
17695_bclustnum_138_kamer_1_number_1	0	1.098612289	0	0	0	0	0	1.098612289	0	6.014604736	7.387090236	7.261927093	0	0	0	1.098612289	0	0	1.880313545	1.815290432	2.291411905	1.098612289	1.098612289	1.098612289	0	0	0	0	0	0
17740_bclustnum_288_kamer_1_number_1	6.675593687	6.680170631	6.66845948	0	0	0	0	0	0	0	0	0	0	0	0	0	0	0	0	0	0	0	0	0	0	0	1.098612289	0	0	0
177685_bclustnum_303_kamer_1_number_1	0	1.098612289	0	0	0	0	4.712103464	5.04055649	4.710727682	6.893994026	6.971771789	6.967598419	5.338739281	5.233778845	5.271860448	0	0	0	3.927459251	3.614514141	3.936173032	0	0	0	0	0	0	0	0	0
178066_bclustnum_13_kamer_1_number_1	0	1.609437912	0	0	0	0	0	0	0	6.094571525	7.006595584	6.881753134	0	0	0	0	1.098612289	1.098612289	0	0	0	0	0	1.098612289	0	1.098612289	0	0	0	1.558144618
178104_bclustnum_12_kamer_1_number_1	0	0	0	0	0	0	4.674696249	4.609162207	4.723841716	6.11853763	6.656983561	6.670005575	0	1.098612289	0	0	0	0	4.678420648	4.990432587	4.780525871	3.135494216	2.667228207	2.197224577	0	0	0	4.678420648	4.772378105	4.705920089
1781_bclustnum_5089_kamer_29_number_3	6.65993474	6.618405149	6.580292337	5.986452005	6.052089169	6.16856416	0	0	0	0	0	0	0	0	1.098612289	0	0	0	0	0	0	1.098612289	0	0	0	0	1.098612289	0	0	0
178221_bclustnum_45_kamer_1_number_1	4.895972386	5.007296393	4.907124918	6.593805888	6.711875422	6.689737319	0	0	1.717651753	1.098612289	0	1.098612289	1.098612289	0	0	1.609437912	2.607964637	1.550598322	1.098612289	2.344549155	1.550598322	2.09714147	1.985914895	2.607964637	5.488937726	5.685037887	5.796057751	2.45673863	2.781480325	2.988561626
179331_bclustnum_15_kamer_1_number_1	0	0	0	6.665046572	6.631342799	6.59509722	0	0	0	0	0	0	0	1.098612289	1.098612289	0	0	0	0	0	0	0	0	0	0	0	0	0	0	0
179417_bclustnum_84_kamer_1_number_1	0	0	0	0	0	0	0	1.098612289	1.098612289	6.509619744	6.794213611	6.797940413	0	0	0	0	0	0	0	0	1.098612289	1.540445755	1.098612289	1.098612289	0	0	0	0	0	0
17943_bclustnum_341_kamer_1_number_1	0	0	0	0	0	0	0	0	0	6.338240659	7.309881486	7.26071232	1.098612289	1.098612289	0	0	0	0	1.098612289	0	0	0	0	0	0	0	0	0	0	0
17943_bclustnum_59_kamer_1_number_1	1.609437912	1.609437912	1.945910149	1.609437912	1.098612289	1.609437912	1.098612289	0	0	5.979391966	6.985641818	6.835338338	0	0	0	0	0	0	0	0	0	1.098612289	1.098612289	0	1.098612289	0	0	1.098612289	0	1.098612289
179688_bclustnum_39_kamer_1_number_1	0	0	0	0	0	0	4.134438292	4.19133666	4.017202505	1.098612289	1.098612289	1.098612289	0	1.098612289	1.824549292	3.460512912	3.624340933	3.672071488	6.530877628	6.369330615	6.621183257	4.091562362	4.143134726	4.028324055	0	0	0	1.897120485	0	1.609437912
179708_bclustnum_30_kamer_1_number_1	1.098612289	0	0	0	0	0	0	0	0	0	0	0	0	0	0	6.815914075	6.856461985	6.761572769	0	0	0	7.087991329	7.160845907	7.13169851	0	0	0	0	0	0
179848_bclustnum_49_kamer_1_number_1	0	0	0	1.098612289	1.098612289	0	5.162881304	5.252273428	5.211304171	6.352629396	6.727032843	6.731415396	0	0	0	5.399668355	5.157139672	4.998900038	5.220355825	5.463831805	5.060485214	6.23636959	6.129775437	6.124683391	0	0	0	0	0	0
179860_bclustnum_38_kamer_1_number_1	0	0	0	6.660290858	6.70373275	6.665400875	0	0	1.609437912	0	0	0	0	0	0	0	1.098612289	1.4663363	0	1.098612289	0	0	0	0	0	0	0	0	0	0
180154_bclustnum_53_kamer_1_number_1	0	0	0	0	0	0	5.539300836	5.537334267	5.133118378	2.31677001	0	1.504077397	1.945910149	1.945910149	2.047692843	0	0	0	6.506904508	6.427297192	6.402746041	0	0	0	0	0	0	0	0	0
180490_bclustnum_314_kamer_11_number_2	0	0	0	0	0	0	4.036008985	3.923951576	4.290459441	6.58396232	6.929321057	6.818486811	0	0	0	4.369447852	4.328098293	4.216562195	4.510859507	4.566429358	4.24563401	4.222444565	4.676560182	4.574710979	0	0	0	1.609437912	1.609437912	1.098612289
180836_bclustnum_21_kamer_1_number_1	0	1.526056303	1.098612289	0	0	0	0	0	0	0	0	0	0	0	0	0	0	0	0	0	0	0	0	0	6.522092798	6.480044562	6.403022721	0	0	0
180916_bclustnum_26_kamer_1_number_1	0	0	0	0	0	0	0	0	0	6.442009771	6.676663978	6.618146017	0	1.098612289	0	0	0	0	0	1.098612289	1.098612289	0	0	0	0	0	1.098612289	0	0	0
18106_bclustnum_60_kamer_1_number_1	4.374039825	4.555979942	4.412246626	4.196127687	4.636494419	4.580318936	3.803481881	3.652511069	3.80666249	5.696613506	6.633882748	6.565063541	5.301881009	5.124814808	5.218034213	5.196124052	4.659383712	4.617948198	5.890458426	5.637336357	5.441178848	4.902091941	5.002986114	4.916844626	2.824771933	2.367123927	3.161899042	3.825530039	4.232033343	4.050542437
181312_bclustnum_49_kamer_1_number_1	0	0	0	0	0	0	0	0	0	0	0	0	0	0	0	6.101564812	5.683957247	5.650930071	0	0	0	6.591978212	6.547741912	6.506447517	0	0	0	1.098612289	2.00148	1.421386371
18136_bclustnum_837_kamer_1_number_1	0	1.098612289	0	0	0	0	0	1.92181211	1.098612289	6.540838062	5.865405169	6.079933195	0	0	0	0	0	0	2.288196066	1.635754571	2.277267285	1.098612289	0	1.139434283	0	0	0	4.605170186	4.584967479	4.420560814
181659_bclustnum_46_kamer_1_number_1	6.525696591	6.477672118	6.495403009	0	0	0	0	0	0	0	0	0	0	0	0	0	0	0	0	0	0	0	0	0	0	0	0	0	0	0
181816_bclustnum_32_kamer_1_number_1	0	0	0	0	0	0	5.003946306	4.698660529	4.527809545	6.160785292	6.911548077	6.324160018	0	0	0	0	0	0	5.14633101	5.357529226	5.342334252	0	0	0	0	0	0	4.730921391	4.553876892	4.437934267
181923_bclustnum_46_kamer_1_number_1	6.899162466	6.84076041	6.844176297	0	0	0	0	0	0	0	0	0	0	0	0	0	0	0	0	0	0	0	0	0	0	0	0	0	0	0
18243_bclustnum_148_kamer_1_number_1	0	0	0	0	0	0	3.044522438	2.944438979	2.621038824	6.741405492	7.227117688	7.259643786	1.609437912	2.128231706	1.791759469	0	0	0	1.098612289	1.945910149	1.446918983	0	0	0	0	0	0	1.098612289	0	1.098612289
182693_bclustnum_34_kamer_1_number_1	0	0	0	0	0	0	3.036552668	3.361007132	3.052429192	4.345968017	4.09988419	4.297285406	0	1.098612289	1.098612289	5.893942673	5.695414225	5.743003188	3.650658241	3.938339664	3.832258759	5.488937726	5.395897695	5.314028301	0	0	0	6.762151305	6.71356355	6.621183257
18311_bclustnum_823_kamer_1_number_1	0	0	0	0	0	0	0	0	0	6.726233402	8.25357394	8.258248872	0	0	0	0	0	0	0	0	0	1.098612289	0	0	0	0	0	1.945910149	1.609437912	1.609437912
183249_bclustnum_233_kamer_1_number_1	6.585251231	6.636821501	6.361734163	0	0	0	0	0	0	0	0	0	0	0	0	0	0	0	0	0	0	0	0	0	0	0	0	0	0	0
183445_bclustnum_18_kamer_1_number_1	0	1.810108426	1.098612289	0	0	0	0	0	1.098612289	6.572903329	7.992944547	7.948738455	1.981001469	1.098612289	1.252762968	1.098612289	0	1.098612289	0	0	1.098612289	1.4663363	1.832581464	2.014903021	0	1.098612289	0	0	0	0
1836_bclustnum_4849_kamer_10_number_2	0	0	0	6.639352821	6.688354714	6.499787041	0	0	0	0	0	0	0	0	0	0	0	0	0	0	0	0	0	0	0	0	0	0	0	0
183990_bclustnum_41_kamer_1_number_1	0	0	0	0	0	0	5.18178355	5.021245473	5.320078858	6.574796862	6.656726524	6.683360946	1.098612289	1.189582763	0	1.722766598	1.609437912	2.595254707	5.699774453	5.545958389	5.530222424	1.098612289	1.791759469	2.00148	0	0	0	2.397895273	2.131627125	2.607964637
184064_bclustnum_187_kamer_1_number_1	0	0	0	0	0	0	2.351375257	2.597386761	2.69774394	5.436835057	6.517882477	6.405228458	0	0	0	0	1.098612289	0	2.886090384	3.051819558	2.745435898	0	1.098612289	0	0	0	0	0	0	0
1842_bclustnum_5777_kamer_1_number_1	6.947552749	6.944858367	6.96772086	0	0	0	0	0	1.098612289	0	0	0	0	0	0	0	0	0	0	0	0	0	0	0	0	0	0	0	0	0
184498_bclustnum_86_kamer_1_number_1	6.781965273	6.549650742	6.515205903	0	0	0	1.098612289	0	0	0	0	0	0	0	0	0	0	1.098612289	0	0	0	1.098612289	1.098612289	0	0	0	0	0	0	0
18467_bclustnum_154_kamer_1_number_1	0	0	0	0	0	0	5.013491212	5.401776075	5.332718793	5.680172609	6.515558259	6.748759547	0	0	1.098612289	0	0	0	4.875197323	5.105945474	4.965944715	0	0	0	0	0	0	1.098612289	1.098612289	0
1848_bclustnum_348_kamer_1_number_1	0	0	0	0	0	0	3.768921393	3.166626284	3.496507561	6.104154636	6.65911057	6.644904996	0	0	0	0	0	1.098612289	1.098612289	1.609437912	1.913649615	1.819158984	2.32238772	2.649212731	0	0	0	1.36687706	1.945910149	2.054123734
184905_bclustnum_28_kamer_1_number_1	1.098612289	1.481604541	1.098612289	0	0	1.098612289	0	0	0	0	0	0	0	0	0	0	0	0	0	0	0	0	0	0	7.035770234	7.038283416	7.03652661	0	0	0
18510_bclustnum_854_kamer_1_number_1	0	0	0	6.66281336	6.671399834	6.710218556	0	0	0	0	0	0	0	1.098612289	0	0	0	0	0	0	0	0	0	0	0	1.098612289	0	0	0	0
185249_bclustnum_12_kamer_1_number_1	0	0	0	6.954104371	6.895119786	6.749611471	0	0	0	0	0	0	0	0	0	0	0	0	0	0	0	0	0	0	0	0	0	0	0	0
18534_bclustnum_1168_kamer_1_number_1	0	0	0	0	0	0	4.750265706	4.88105039	4.347263074	6.18980298	6.909423886	6.929056782	1.098612289	1.568615918	0	0	0	1.098612289	5.105139088	5.314520386	5.471989121	1.098612289	1.098612289	0	0	0	0	0	0	0
18558_bclustnum_299_kamer_1_number_1	5.33513134	5.527725256	5.336335434	0	0	0	0	0	0	6.568545499	7.151093538	7.388148499	0	0	1.098612289	0	0	0	1.098612289	0	0	0	0	1.098612289	1.098612289	1.098612289	0	0	0	0
185617_bclustnum_9_kamer_1_number_1	0	0	0	0	0	0	0	0	0	5.555170318	6.652493929	6.515108168	0	0	0	0	0	0	0	0	0	0	0	0	0	0	0	0	0	0
185780_bclustnum_23_kamer_1_number_1	0	0	0	0	0	0	2.302585093	2.397895273	2.564949357	6.813884063	7.433920645	7.470714044	0	0	0	0	0	0	1.098612289	0	1.609437912	0	0	0	0	0	0	0	0	0
18614_bclustnum_6843_kamer_9_number_2	0	0	0	0	0	0	0	0	0	6.016505879	6.521461717	6.56425883	0	0	0	0	0	0	0	0	0	0	0	0	0	0	0	3.563477783	3.195754577	3.160034113
186256_bclustnum_23_kamer_1_number_1	0	0	0	0	0	0	0	0	0	6.751769082	7.329185596	7.317683745	0	1.098612289	0	0	0	1.098612289	0	0	0	0	0	1.098612289	0	0	0	0	0	0
1862_bclustnum_962_kamer_1_number_1	0	0	0	0	0	0	1.609437912	0	2.054123734	5.073090396	4.74927053	4.709530201	0	0	0	5.545177444	5.051988348	5.476463552	1.098612289	1.609437912	1.098612289	6.007721681	5.976069144	6.501789546	0	0	0	5.502889532	5.466370952	5.512621969
1863_bclustnum_115_kamer_1_number_1	0	0	0	0	0	0	0	0	0	0	0	0	0	0	0	0	0	0	0	0	0	0	0	0	6.572841827	6.573121352	6.681105588	0	0	0
1863_bclustnum_3853_kamer_1_number_1	0	1.550598322	0	1.550598322	1.609437912	0	5.012852834	4.919980926	4.833635551	6.08399359	6.542312005	6.477143118	4.95033312	5.089649781	5.03188785	4.842437525	5.40617576	4.985884847	5.249946115	5.027531742	5.133837693	5.772132473	5.597187864	5.613533134	0	0	0	5.067507	5.140364467	5.060485214
186735_bclustnum_114_kamer_1_number_1	1.609437912	1.098612289	1.4663363	0	0	0	0	0	1.098612289	1.098612289	0	0	0	0	0	0	0	0	0	0	0	1.098612289	0	0	6.848762949	6.944231846	6.821107472	0	0	0
186735_bclustnum_78_kamer_1_number_1	6.683861446	6.75716492	6.476972363	0	0	1.098612289	0	0	1.098612289	0	0	0	0	0	0	0	0	0	0	0	0	0	0	0	0	0	0	0	0	0
186778_bclustnum_39_kamer_1_number_1	0	0	0	0	0	0	0	0	0	0	0	0	6.523562306	6.549650742	6.554645401	0	0	0	0	0	0	0	0	0	0	0	0	0	0	0
186909_bclustnum_12_kamer_1_number_1	0	0	0	6.58837612	6.516784617	6.53727114	0	0	0	0	0	0	0	0	0	0	0	0	0	0	0	0	0	0	0	0	0	0	0	0
187045_bclustnum_15_kamer_1_number_1	1.098612289	1.098612289	0	0	0	0	0	0	0	0	0	0	0	0	0	0	0	0	0	0	0	0	0	0	6.491986773	6.386598135	6.50353939	0	0	0
187165_bclustnum_5_kamer_4_number_2	6.662707318	6.741307465	6.736966958	0	0	1.098612289	0	0	0	0	0	0	0	0	0	0	0	0	0	0	0	0	0	0	0	0	0	0	0	0
187194_bclustnum_26_kamer_24_number_2	5.350278688	5.427884035	5.335935835	6.510630295	6.459513142	6.415096959	0	1.098612289	0	0	0	0	0	0	0	0	0	0	0	0	0	0	0	0	0	0	0	0	0	0
187629_bclustnum_15_kamer_1_number_1	6.59441346	6.586171655	6.225548038	0	0	0	0	0	0	0	0	0	1.098612289	0	1.098612289	0	0	0	1.098612289	0	0	0	0	0	0	0	0	0	1.098612289	1.098612289
187657_bclustnum_4_kamer_1_number_1	5.880532986	5.818598149	5.839914649	6.316261752	6.401917197	6.215107973	5.351858133	5.565477803	5.43153621	6.381816017	7.179414671	7.2498261	1.098612289	1.098612289	1.526056303	0	1.098612289	0	5.311796119	5.477659489	5.328570103	1.098612289	0	0	1.098612289	1.4663363	1.098612289	0	1.098612289	0
187871_bclustnum_118_kamer_1_number_1	0	1.098612289	0	6.789534648	6.775936704	6.739730633	0	0	0	0	0	0	0	0	0	0	0	0	0	0	0	0	0	0	0	0	0	0	0	0
188153_bclustnum_38_kamer_1_number_1	5.745289035	5.703305694	5.737955212	5.640892372	5.628649362	5.582420542	4.336356972	4.147659395	4.553876892	5.837313451	6.673478735	6.638380599	5.424950017	5.511123672	5.545177444	4.341947853	4.094344562	4.434212218	5.134114667	5.002024998	5.320220727	5.216488899	5.247776421	5.311796119	0	0	0	4.58642458	4.252568364	4.266695746
18836_bclustnum_406_kamer_1_number_1	0	0	0	0	0	0	2.335374593	2.065455441	1.563976003	6.921391877	6.879972898	6.849066283	0	0	0	0	1.098612289	1.098612289	1.098612289	0	1.098612289	1.098612289	1.945910149	1.887069649	0	0	0	0	1.098612289	1.098612289
188460_bclustnum_213_kamer_1_number_1	0	0	0	0	0	0	3.654978765	3.26448761	3.799228258	6.30949819	7.18019934	7.14440718	2.197224577	2.197224577	1.871802177	2.433613355	2.833213344	2.48490665	3.70912806	3.449987546	3.344037791	3.289643654	3.63758616	3.251664357	0	0	0	0	0	1.098612289
189080_bclustnum_37_kamer_1_number_1	0	0	0	0	0	0	2.862200881	2.656756907	2.990161787	5.835979644	6.830334132	6.708084084	0	0	0	1.098612289	0	0	4.709530201	4.385146762	3.998200702	2.224623552	2.624668592	2.140066163	0	0	0	1.098612289	1.098612289	0
18908_bclustnum_566_kamer_1_number_1	0	0	0	0	0	0	6.404567082	6.349138991	6.307004948	0	0	0	0	0	0	0	0	0	6.849914279	6.808155914	6.899118086	0	0	0	0	0	0	0	0	0
189157_bclustnum_197_kamer_1_number_1	1.098612289	0	1.446918983	1.446918983	1.386294361	0	4.502583597	4.764308407	4.810149767	6.051500761	6.510853402	6.770215865	6.346513169	6.125558282	6.110136077	5.33753808	5.174736305	5.191566997	5.092522454	5.062595033	5.058790336	6.198478716	6.2494925	6.18929029	0	0	1.098612289	5.120983351	5.305789381	5.122474776
1896_bclustnum_8974_kamer_1_number_1	0	0	0	0	0	0	0	0	0	5.125450969	6.844016438	6.774081019	0	0	0	0	1.098612289	0	0	1.098612289	0	2.397895273	2.564949357	2.564949357	0	0	0	0	0	0
189721_bclustnum_22_kamer_1_number_1	6.598509029	6.548219103	6.576748082	0	0	0	0	0	0	0	0	0	0	0	0	0	0	0	0	0	0	0	0	0	0	0	0	0	0	0
189788_bclustnum_25_kamer_1_number_1	6.590497457	6.46808685	6.571882463	0	0	0	1.609437912	1.098612289	1.098612289	1.098612289	1.098612289	0	0	0	0	1.098612289	0	0	0	0	0	1.609437912	1.098612289	0	0	0	0	0	0	0
189919_bclustnum_39_kamer_1_number_1	1.098612289	1.252762968	0	0	0	0	0	0	0	0	0	0	0	0	0	0	0	0	0	0	0	0	0	0	6.692496809	6.681064193	6.708694398	0	0	0
189958_bclustnum_30_kamer_1_number_1	0	0	0	1.098612289	1.098612289	0	6.283760957	6.308098442	6.37058568	4.813809051	5.639777145	5.732693818	1.098612289	2.261763098	2.00148	4.043051268	3.770459441	3.514526067	6.910152404	6.870468694	6.810362933	3.708682081	4.195697056	4.070734697	0	0	0	0	0	0
189970_bclustnum_33_kamer_1_number_1	0	0	0	0	0	0	4.567814053	4.573124153	4.426227714	4.337674981	6.66372256	6.478713922	5.584364353	5.713224425	5.451609106	1.945910149	2.553896188	2.564949357	4.885321473	4.97212313	4.780240516	5.654490685	5.691325204	5.602646357	0	0	0	4.540250792	4.38949865	4.555379972
19024_bclustnum_62_kamer_54_number_2	4.628232202	4.469731833	4.584967479	6.53717409	6.591216838	6.510258341	0	0	0	0	0	0	0	0	0	0	0	0	0	0	0	0	0	0	0	0	0	0	0	0
190489_bclustnum_52_kamer_1_number_1	6.751101469	6.698268054	6.818681413	0	1.098612289	0	0	0	0	0	0	0	0	0	0	0	0	0	0	0	0	0	0	0	0	0	0	0	0	0
190682_bclustnum_134_kamer_1_number_1	0	0	1.098612289	0	0	0	0	0	0	0	0	0	1.098612289	1.098612289	1.098612289	0	1.098612289	0	0	0	0	0	1.098612289	0	6.471314851	6.472346295	6.56510862	0	0	0
190885_bclustnum_38_kamer_1_number_1	0	0	0	0	0	0	0	0	0	2.522082003	1.609437912	1.609437912	0	0	0	0	0	0	0	0	0	0	0	1.098612289	6.053175637	7.078172931	6.992647746	1.386294361	0	0
1908_bclustnum_6266_kamer_1_number_1	0	0	0	0	0	0	0	0	1.098612289	5.929589143	6.628608676	6.609927243	0	0	0	0	0	0	0	0	0	0	0	0	0	0	0	0	0	0
191074_bclustnum_14_kamer_1_number_1	1.098612289	0	0	1.098612289	0	0	7.102087748	7.03284489	7.095686075	0	0	0	0	0	0	0	0	0	0	0	0	0	0	0	1.098612289	0	0	0	0	0
19109_bclustnum_75_kamer_1_number_1	0	0	0	0	0	0	0	0	1.098612289	1.098612289	0	0	6.50827274	6.511250408	6.541992018	0	0	0	0	0	0	1.4663363	0	0	1.098612289	0	0	0	0	0
1913_bclustnum_577_kamer_1_number_1	0	1.550598322	0	0	0	0	0	0	0	6.302618976	7.029751648	7.048169183	1.098612289	0	1.098612289	0	0	1.098612289	0	0	0	0	0	1.098612289	0	0	0	0	0	0
191696_bclustnum_48_kamer_1_number_1	0	0	0	0	0	0	0	0	0	5.28476596	6.861227454	6.774399871	0	0	0	1.098612289	1.098612289	0	0	0	0	0	0	0	0	0	0	0	0	0
19249_bclustnum_115_kamer_1_number_1	2.564949357	1.704748092	2.197224577	2.564949357	2.397895273	1.945910149	2.014903021	1.098612289	1.098612289	11.72931023	1.098612289	0	1.299283893	1.098612289	1.871802177	0	0	0	0	0	1.098612289	1.098612289	1.098612289	1.609437912	2.48490665	2.302585093	1.945910149	1.609437912	1.098612289	0
192541_bclustnum_65_kamer_13_number_2	0	0	0	0	0	0	5.711254489	5.59471138	5.581614841	6.845347819	7.217076527	7.274825999	1.098612289	0	0	1.098612289	0	0	5.533389489	5.528436532	5.38907173	1.098612289	0	1.098612289	0	0	0	5.55971963	5.479596714	5.547128665
19267_bclustnum_257_kamer_3_number_2	6.890354764	6.807934944	6.859090107	4.327438444	4.454347296	4.369447852	0	0	0	0	0	0	0	0	0	0	0	0	0	0	0	0	0	0	0	0	0	0	0	0
19296_bclustnum_32_kamer_1_number_1	0	0	0	0	0	0	0	1.504077397	0	6.226141334	7.129385686	7.153661777	1.098612289	0	1.098612289	0	0	0	1.098612289	0	0	0	0	0	0	0	0	0	0	0
193057_bclustnum_13_kamer_1_number_1	0	0	0	0	0	0	0	0	0	0	0	0	6.817332636	6.836454747	6.905479692	0	0	0	0	0	0	0	0	0	0	0	0	0	0	0
193179_bclustnum_6_kamer_1_number_1	1.550598322	1.098612289	1.098612289	0	0	0	0	0	0	0	0	0	0	0	0	0	0	0	0	0	0	0	0	0	6.580084198	6.461155628	6.54448722	0	0	0
193201_bclustnum_5_kamer_1_number_1	6.328650814	6.29710932	6.394593595	6.539874931	6.480657871	6.53727114	0	0	0	0	0	0	0	0	0	0	0	0	0	0	0	0	0	0	0	0	0	0	0	0
19367_bclustnum_70_kamer_1_number_1	0	0	0	0	0	0	0	0	0	6.261873291	6.636675948	6.68669331	0	0	0	0	0	0	0	0	0	0	0	0	0	0	0	0	0	0
19438_bclustnum_154_kamer_1_number_1	0	0	1.098612289	1.098612289	0	1.098612289	4.413264851	4.309248931	4.519276729	3.959452244	6.648120187	6.592130418	5.189244413	5.060485214	5.278114659	0	0	1.098612289	5.876533379	5.797791809	5.685037887	1.098612289	1.098612289	0	0	0	0	0	0	0
194649_bclustnum_55_kamer_1_number_1	0	0	0	0	0	0	1.860752118	1.223775432	2.079441542	6.157120925	6.601864428	6.738231875	2.197224577	1.725509262	1.533929576	0	0	1.609437912	1.098612289	1.312187543	1.686398954	0	0	0	0	0	0	1.526056303	1.098612289	1.098612289
194_bclustnum_7957_kamer_1_number_1	0	0	0	0	0	0	2.397895273	1.098612289	2.09714147	6.732644462	7.086202674	7.014320069	0	0	2.065455441	0	2.1768155	1.971552833	2.925116658	2.595254707	2.743771208	3.89921331	4.315061171	4.204692619	0	0	0	0	0	0
19524_bclustnum_69_kamer_1_number_1	0	0	0	6.523982189	6.51089653	6.529836269	0	0	0	0	0	0	0	0	0	2.302585093	2.852629507	2.48490665	0	0	0	2.967559111	2.302585093	3.15463166	0	0	0	0	0	0
195384_bclustnum_94_kamer_1_number_1	6.801004909	6.761572769	6.803782689	2.356652735	1.691675748	1.652922599	0	0	0	0	0	0	0	0	0	0	0	0	0	0	0	0	0	0	0	0	0	0	0	0
195663_bclustnum_94_kamer_1_number_1	6.39933343	6.409627035	6.541350294	0	1.098612289	1.435084525	0	0	0	0	0	0	0	0	0	0	0	0	0	0	0	0	0	0	0	0	0	0	0	0
195703_bclustnum_67_kamer_1_number_1	0	0	0	0	0	1.098612289	7.580699752	7.565446252	7.572672724	1.098612289	0	0	0	0	0	0	0	0	7.072421901	7.102770924	7.148872335	0	0	0	0	0	0	0	0	0
196215_bclustnum_58_kamer_1_number_1	0	1.098612289	1.609437912	0	0	0	0	0	0	0	0	0	0	1.540445755	0	0	0	0	0	0	0	0	0	0	6.467698726	6.541318558	6.415096959	2.437500527	2.09714147	2.649212731
196804_bclustnum_52_kamer_1_number_1	0	0	0	2.417893959	2.221615789	1.810108426	0	0	0	5.848087704	7.25604315	7.266002985	1.098612289	1.504077397	0	0	1.272966076	0	0	0	0	0	1.098612289	0	0	0	0	0	1.609437912	1.609437912
197264_bclustnum_27_kamer_1_number_1	0	0	0	5.227089857	5.307029307	5.21795294	0	0	0	6.43097353	7.051206061	7.044905117	0	0	0	1.098612289	1.609437912	1.098612289	1.871802177	0	1.098612289	0	1.098612289	0	0	0	0	0	0	0
197264_bclustnum_9_kamer_1_number_1	6.483277062	6.602889068	6.457816204	4.813987607	4.947184182	4.880276008	0	0	0	1.504077397	0	1.098612289	0	1.609437912	0	0	0	0	1.299283893	0	1.563976003	0	1.098612289	0	0	0	0	0	0	0
197281_bclustnum_62_kamer_79_number_2	1.098612289	0	0	6.566270099	6.605297921	6.680495769	0	0	0	0	0	0	0	0	0	0	0	0	0	0	0	0	0	0	0	0	0	0	0	0
19733_bclustnum_88_kamer_1_number_1	0	0	0	1.098612289	0	0	1.098612289	0	0	6.113078015	6.651756611	6.640621961	1.098612289	0	0	0	0	0	0	0	0	0	0	0	0	0	0	0	0	0
198285_bclustnum_52_kamer_1_number_1	6.942398222	6.906254153	6.892641641	1.435084525	1.35812377	1.386294361	0	0	0	0	0	0	0	0	0	0	0	0	0	0	0	0	0	0	3.258096538	3.258096538	3.245194432	0	0	0
19861_bclustnum_1532_kamer_4_number_2	0	1.098612289	0	0	0	0	0	0	0	0	0	0	0	0	0	0	0	0	0	0	0	0	0	0	6.505036397	6.509141646	6.604621102	0	0	0
19864_bclustnum_154_kamer_1_number_1	0	0	0	0	0	0	0	0	0	6.556305233	6.279354098	6.255323847	0	0	0	0	0	0	0	0	0	0	0	0	0	0	0	0	0	0
198684_bclustnum_27_kamer_1_number_1	0	1.098612289	0	2.708050201	2.525728644	2.917770732	3.555348061	3.218875825	3.287573186	4.623569869	6.803505258	6.514712691	4.442651256	4.262679877	3.891820298	2.564949357	2.564949357	2.564949357	3.122994682	2.854376061	3.061688539	4.59511985	4.143134726	4.067805496	3.044522438	2.856470206	2.833213344	3.433987204	3.135494216	3.891820298
1988_bclustnum_4093_kamer_1_number_1	6.484198499	6.543911846	6.567275623	2.351375257	2.014903021	2.397895273	0	2.381228052	1.64222838	4.61181506	4.832002924	4.857421953	3.799228258	3.521445525	3.912023005	1.098612289	0	1.098612289	0	0	1.343733877	0	0	0	0	0	0	3.35573617	3.349904087	3.106078838
199007_bclustnum_15_kamer_1_number_1	6.960157958	6.969602682	6.963568344	0	0	1.098612289	0	0	0	0	0	0	0	0	0	0	0	0	0	0	0	0	0	0	0	0	1.098612289	0	0	0
19932_bclustnum_179_kamer_1_number_1	1.76766143	1.717651753	0	0	0	0	4.824305716	4.661077818	4.777020443	6.662849131	6.022842083	5.995830005	1.098612289	1.526056303	1.694594904	0	0	1.098612289	5.192956851	5.099866428	4.987407608	0	0	0	0	0	0	0	0	0
199469_bclustnum_16_kamer_1_number_1	0	1.098612289	0	6.573680167	6.631342799	6.568077911	0	0	1.098612289	0	0	0	0	0	1.609437912	0	0	0	0	0	0	0	0	0	0	0	0	2.1690537	2.45673863	1.945910149
19961_bclustnum_405_kamer_1_number_1	0	0	0	0	0	0	0	0	0	6.844389403	7.323170718	7.532623619	0	0	0	0	0	0	1.098612289	0	0	0	0	0	0	0	0	0	0	0
199669_bclustnum_12_kamer_1_number_1	1.098612289	0	1.550598322	0	0	0	0	0	0	0	1.098612289	0	0	0	0	1.098612289	1.098612289	1.098612289	0	0	0	1.098612289	0	0	6.538139824	6.757513616	6.611368766	0	0	0
19992_bclustnum_0_kamer_1_number_1	0	0	0	0	0	0	0	0	0	0	0	0	0	0	0	0	0	0	0	0	0	6.776506992	6.710279474	6.526201991	0	0	0	0	0	0
1_bclustnum_11992_kamer_1_number_1	5.674182005	5.541263545	5.667961841	6.576624153	6.54263189	6.558827392	0	0	0	1.098612289	0	0	1.386294361	0	1.421386371	0	0	0	0	0	1.098612289	0	0	0	0	0	0	0	0	0
1_bclustnum_12684_kamer_1_number_1	1.098612289	1.098612289	1.945910149	0	0	0	0	0	0	0	0	0	0	0	0	0	0	0	0	0	0	0	0	0	7.077498054	7.059789435	6.810509527	0	0	0
1_bclustnum_1327_kamer_1_number_1	6.962953439	6.872358127	6.88857246	0	0	0	0	0	0	0	0	0	0	0	0	0	0	0	0	0	0	0	0	0	0	0	0	0	0	1.098612289
1_bclustnum_14216_kamer_1_number_1	1.609437912	0	1.098612289	6.840546529	6.89444509	6.879013153	0	0	0	1.098612289	0	0	0	0	0	0	0	0	0	0	0	0	0	0	1.098612289	0	1.098612289	1.609437912	1.098612289	0
1_bclustnum_14605_kamer_1_number_1	6.863339334	6.84977335	6.820379836	6.56948142	6.353983879	6.418364936	0	0	0	0	0	0	0	0	0	0	0	0	0	0	0	0	0	0	0	0	0	0	0	0
1_bclustnum_15152_kamer_1_number_1	6.773896976	6.784618814	6.7420383	5.407171771	5.176149733	5.153291594	0	0	0	0	0	0	0	0	0	0	0	0	0	0	0	0	0	0	0	0	0	0	0	0
1_bclustnum_16125_kamer_1_number_1	6.566320751	6.610311045	6.608000625	0	0	0	0	1.098612289	0	0	0	0	0	0	0	0	0	0	0	0	0	0	0	0	0	0	0	0	0	0
1_bclustnum_16305_kamer_1_number_1	6.84953701	6.863339334	6.766832063	0	0	0	0	0	0	0	0	1.098612289	0	0	0	0	0	0	0	0	0	0	0	0	2.564949357	1.098612289	1.098612289	0	0	0
1_bclustnum_17393_kamer_1_number_1	0	0	1.609437912	6.695445332	6.605297921	6.779921907	1.098612289	0	1.098612289	1.098612289	0	0	0	0	0	0	0	0	0	0	0	0	0	0	0	0	0	0	0	0
1_bclustnum_17916_kamer_1_number_1	6.891287425	6.770151606	6.76811038	1.609437912	0	1.098612289	0	0	0	0	0	0	0	0	0	0	0	0	0	0	0	0	0	0	0	0	0	1.098612289	0	1.098612289
1_bclustnum_18962_kamer_1_number_1	6.670484912	6.673859125	6.680576095	0	0	0	0	1.098612289	0	0	0	0	0	0	0	0	0	0	0	0	0	0	0	0	0	0	0	0	0	0
1_bclustnum_25698_kamer_1_number_1	6.637839776	6.712145423	6.639295273	1.299283893	0	0	1.609437912	0	0	0	0	0	0	0	0	0	0	0	0	0	0	0	0	0	0	0	0	0	0	0
1_bclustnum_27185_kamer_1_number_1	0	0	1.504077397	6.612488515	6.587702896	6.596235329	0	0	0	0	0	0	0	0	0	0	0	0	0	0	0	0	0	0	0	0	1.098612289	0	0	0
1_bclustnum_2772_kamer_1_number_1	6.976553465	7.035761436	6.937420872	3.988984047	3.756019276	3.68609809	0	0	0	0	0	0	0	0	0	0	0	0	0	0	0	0	0	0	0	0	0	0	0	0
1_bclustnum_28007_kamer_1_number_1	6.972981064	6.973730268	6.923431758	0	0	0	0	0	0	0	0	0	0	0	0	0	0	0	0	0	0	0	0	0	0	0	0	0	0	0
1_bclustnum_28380_kamer_1_number_1	1.098612289	1.098612289	1.098612289	0	0	0	5.146039931	4.987025428	4.814214813	5.733341277	6.228511004	6.160679756	6.231465215	6.243195555	6.176906231	0	1.098612289	0	5.023880521	5.253581473	4.997212274	0	0	0	6.933968686	6.907866273	6.957078634	0	0	0
1_bclustnum_28750_kamer_1_number_1	6.582486251	6.50112299	6.541029999	0	0	1.098612289	0	0	0	2.737246478	0	1.098612289	0	0	0	0	0	0	0	0	0	0	0	0	0	0	0	0	0	0
1_bclustnum_32528_kamer_1_number_1	1.558144618	1.609437912	1.832581464	1.098612289	0	0	0	0	0	0	0	0	0	0	0	0	0	0	0	0	0	0	0	0	6.826665607	6.799799175	6.840309068	0	0	0
1_bclustnum_33483_kamer_1_number_1	0	0	1.386294361	0	0	0	0	1.098612289	0	0	0	0	0	0	0	0	0	0	1.098612289	0	1.098612289	1.098612289	0	0	6.56948142	6.532657384	6.52192955	0	0	0
1_bclustnum_34560_kamer_1_number_1	6.472346295	6.511085379	6.481917041	0	0	0	0	0	0	0	0	0	0	0	0	0	0	0	0	0	0	0	0	0	0	0	0	0	0	0
1_bclustnum_36230_kamer_1_number_1	6.540067054	6.567296707	6.509762682	0	0	0	0	0	0	0	0	0	0	0	0	0	0	0	0	0	0	0	0	0	0	0	0	0	0	0
1_bclustnum_3659_kamer_1_number_1	6.525844575	6.545827994	6.540709602	1.098612289	0	1.098612289	0	0	0	0	0	0	0	0	0	0	0	0	0	0	0	0	0	0	0	0	0	0	0	0
1_bclustnum_37247_kamer_1_number_1	0	0	0	6.692496809	6.712551502	6.606200085	0	0	0	0	0	0	0	0	0	0	0	0	0	0	0	0	0	0	0	0	0	0	0	0
1_bclustnum_37955_kamer_1_number_1	6.736966958	6.753104141	6.708433229	0	0	0	0	0	0	0	0	0	0	0	0	0	0	0	0	0	0	0	0	0	0	0	0	0	0	0
1_bclustnum_39504_kamer_1_number_1	0	0	0	0	0	0	0	1.098612289	0	6.522460378	6.733798242	6.803505258	0	1.098612289	1.098612289	0	0	0	1.098612289	0	0	0	0	0	0	0	0	0	0	0
1_bclustnum_41033_kamer_1_number_1	6.584638066	6.399704136	6.447305863	0	0	0	0	0	0	0	0	0	0	0	0	0	0	0	0	0	0	0	0	0	0	0	0	0	0	0
1_bclustnum_42883_kamer_1_number_1	6.507774604	6.502124157	6.49878353	0	0	0	0	0	0	0	0	0	0	0	0	0	0	0	0	0	0	0	0	0	0	0	0	0	0	0
1_bclustnum_43094_kamer_1_number_1	0	1.386294361	1.098612289	0	0	0	0	0	0	0	1.098612289	0	0	0	0	0	0	0	1.098612289	1.098612289	0	0	0	0	6.906976976	6.905642048	6.86357139	0	0	0
1_bclustnum_44541_kamer_1_number_1	6.524866888	6.6505662	6.675543233	6.244166901	6.183233008	6.359141249	1.686398954	0	0	1.945910149	0	0	0	0	0	0	0	0	0	0	0	0	0	0	1.098612289	0	0	1.609437912	0	0
1_bclustnum_45638_kamer_1_number_1	6.695798917	6.627600803	6.612488515	0	1.098612289	0	0	0	0	0	0	0	0	0	0	0	0	0	0	0	0	0	0	0	0	0	0	0	0	0
1_bclustnum_46555_kamer_1_number_1	6.654705202	6.858914764	6.689421393	0	0	0	0	0	0	0	0	0	0	0	0	0	0	0	0	0	0	0	0	0	0	0	0	0	0	0
1_bclustnum_46583_kamer_1_number_1	7.075597515	7.041849013	7.065186287	0	0	0	0	0	0	0	0	0	0	0	0	0	0	0	0	0	0	0	0	0	0	0	0	0	0	0
1_bclustnum_47973_kamer_1_number_1	6.790596548	6.792095238	6.779795763	0	0	0	0	0	0	0	0	0	0	0	0	0	0	0	0	0	0	0	0	0	0	0	0	0	0	0
1_bclustnum_500_kamer_1_number_1	1.609437912	1.098612289	1.945910149	0	0	0	3.796353984	4.072308543	4.238556011	5.682269385	6.597355775	6.51197413	5.311687585	5.45892998	5.530955699	4.799601457	4.742250275	4.361627479	5.380606779	5.307123479	4.953112108	4.781708385	4.565148912	4.784278252	0	0	0	4.17438727	4.24959321	4.051115158
1_bclustnum_51770_kamer_1_number_1	6.807934944	6.737306165	6.749094779	0	0	0	0	0	0	0	0	0	0	0	0	0	0	0	0	0	0	0	0	0	0	0	0	0	0	0
1_bclustnum_54596_kamer_1_number_1	6.374268145	6.509762682	6.588315562	0	1.098612289	0	0	0	0	1.913649615	0	0	0	0	0	0	0	0	1.098612289	0	1.098612289	0	0	0	0	0	0	0	0	0
1_bclustnum_56104_kamer_1_number_1	1.76766143	0	1.098612289	0	0	0	0	0	0	0	0	0	0	0	0	0	0	1.098612289	0	0	0	0	0	0	6.584638066	6.643645191	6.519310991	0	1.098612289	1.609437912
1_bclustnum_56916_kamer_1_number_1	0	0	0	0	0	0	0	1.098612289	0	0	0	0	0	0	0	0	0	0	0	0	0	0	0	0	6.65544035	6.624950626	6.775746156	0	0	0
1_bclustnum_57542_kamer_1_number_1	6.835542587	6.786341033	6.84457903	0	1.098612289	0	0	0	0	0	0	0	0	0	0	0	0	0	0	0	0	0	0	0	0	0	0	1.098612289	0	0
1_bclustnum_60399_kamer_1_number_1	6.634896135	6.704414355	6.627512136	3.821369367	4.246906838	3.816489601	2.598562662	2.737246478	2.140066163	4.518159173	4.608497644	4.224397203	3.561676566	3.320229524	3.57421748	3.227724559	3.735020875	3.085979659	4.380636919	3.835860925	3.91424254	2.598562662	2.722754889	3.191845783	1.904238091	2.512302921	0	2.197224577	2.417893959	1.4663363
1_bclustnum_60973_kamer_1_number_1	1.098612289	0	1.098612289	0	0	0	0	0	0	0	0	0	3.316779004	3.656209041	3.295836866	0	0	0	0	0	0	0	0	0	6.850243744	6.89444509	6.863803391	0	0	0
1_bclustnum_61088_kamer_1_number_1	6.603266088	6.544271493	6.573330944	0	0	0	0	1.098612289	0	0	0	0	0	0	0	0	0	0	0	0	0	0	0	0	0	0	0	0	0	0
1_bclustnum_61467_kamer_1_number_1	6.861478853	6.927881383	6.967381756	0	0	0	1.526056303	1.098612289	0	2.772588722	0	1.824549292	0	0	0	0	0	0	1.098612289	0	1.098612289	1.098612289	0	0	0	0	0	0	0	0
1_bclustnum_62607_kamer_1_number_1	6.817557011	6.823286122	6.795705775	3.569532696	3.589059119	3.295836866	2.740840024	3.044522438	2.397895273	2.708050201	1.609437912	1.609437912	0	0	0	0	0	0	0	0	0	0	0	0	2.833213344	2.63905733	3.020424886	2.708050201	2.397895273	2.708050201
1_bclustnum_63296_kamer_1_number_1	0	0	0	0	0	0	0	0	0	0	0	0	0	0	0	0	0	0	0	0	0	0	0	0	6.913180536	6.831233781	6.955592608	0	0	0
1_bclustnum_68567_kamer_1_number_1	6.783325201	6.658331919	6.583409222	0	0	0	0	0	0	0	0	0	0	0	0	0	0	0	0	0	0	0	0	0	1.098612289	0	1.098612289	0	0	0
1_bclustnum_69784_kamer_1_number_1	1.386294361	1.609437912	1.098612289	0	0	0	0	0	0	0	0	0	0	0	0	0	0	0	0	0	0	0	0	0	7.141949546	7.055502644	7.140365876	0	0	0
1_bclustnum_69900_kamer_1_number_1	6.555041052	6.555988271	6.570103948	0	0	0	0	0	0	0	0	0	0	0	0	0	0	0	0	0	0	0	0	0	1.098612289	0	0	0	1.098612289	0
1_bclustnum_7037_kamer_1_number_1	6.437040997	6.45152358	6.540709602	0	0	0	0	0	0	0	0	0	0	0	0	0	0	0	0	0	0	0	0	0	0	0	0	0	0	0
1_bclustnum_71349_kamer_1_number_1	0	0	1.252762968	0	0	0	0	0	0	0	0	0	0	0	0	0	0	0	0	0	0	0	0	0	6.432045802	6.440547737	6.517015223	0	0	0
1_bclustnum_71408_kamer_1_number_1	6.326943433	6.532698127	6.348166491	5.987288339	5.883940582	5.955549763	1.871802177	1.098612289	2.374905755	3.610917913	4.755743044	4.587515251	0	0	0	0	0	0	3.669951444	3.562465529	3.16758253	0	0	0	2.1102132	2.277267285	1.985914895	0	0	0
1_bclustnum_71449_kamer_1_number_1	6.839357587	6.808671689	6.800046453	0	0	0	0	0	0	1.098612289	0	0	0	0	0	0	0	0	0	0	0	0	0	0	0	0	0	0	0	0
1_bclustnum_74205_kamer_1_number_1	6.745105753	6.70209672	6.668792257	0	0	0	0	0	0	0	0	0	0	0	0	0	0	0	0	0	0	0	0	0	0	0	0	0	0	0
1_bclustnum_7463_kamer_1_number_1	6.534272732	6.461294724	6.56667243	0	0	0	0	0	0	0	0	0	0	0	0	0	0	0	0	0	0	0	0	0	0	0	0	0	0	0
1_bclustnum_75762_kamer_1_number_1	6.88312134	6.801776795	6.885396167	0	0	0	0	0	0	0	0	0	0	0	0	0	0	0	0	0	0	0	0	0	0	0	0	0	0	0
1_bclustnum_7597_kamer_1_number_1	6.563855527	6.538718527	6.500388364	0	1.098612289	0	0	0	0	0	0	0	0	0	0	0	0	0	0	1.504077397	1.098612289	0	0	0	0	0	0	0	0	0
1_bclustnum_76510_kamer_1_number_1	6.550604508	6.495768451	6.568545499	0	0	0	0	0	0	0	0	0	0	0	0	0	0	0	0	0	0	0	0	0	0	0	0	0	0	0
1_bclustnum_76684_kamer_1_number_1	6.634049745	6.621110002	6.610696045	0	0	0	0	0	0	0	0	0	0	0	0	1.4663363	0	0	0	0	0	0	0	0	0	0	0	0	0	0
1_bclustnum_77357_kamer_1_number_1	6.819197252	6.90047887	6.912454222	6.298029707	6.242709529	6.154858094	0	0	0	0	0	0	0	0	0	0	0	0	0	0	0	0	0	1.098612289	0	0	0	0	0	0
1_bclustnum_79306_kamer_1_number_1	0	0	0	0	0	0	0	0	0	1.098612289	0	0	0	0	0	0	0	0	0	0	0	0	0	0	6.502190166	6.52532287	6.372180916	0	0	0
1_bclustnum_79710_kamer_1_number_1	6.547860872	6.52612876	6.619072706	1.945910149	0	0	0	1.098612289	0	0	0	0	0	0	0	0	0	0	0	0	0	0	0	0	0	0	0	0	0	0
1_bclustnum_81007_kamer_4_number_2	6.683718829	6.597145702	6.640621961	0	1.098612289	0	0	0	0	0	0	0	0	0	0	0	0	0	0	0	0	0	0	0	0	0	0	0	0	0
1_bclustnum_81461_kamer_1_number_1	0	2.093234727	1.609437912	0	0	0	0	1.098612289	0	0	0	0	0	0	0	0	0	0	0	0	0	0	0	0	6.897817058	6.835303934	6.896918776	0	0	0
1_bclustnum_83087_kamer_1_number_1	6.581871387	6.563855527	6.524541269	0	0	0	0	0	0	0	0	0	0	0	0	0	0	0	0	0	0	0	0	0	0	0	0	0	0	0
1_bclustnum_83379_kamer_1_number_1	1.098612289	0	0	0	0	0	0	0	0	0	0	0	0	0	0	0	0	0	0	0	0	0	0	0	6.58953702	6.525844575	6.500454487	0	0	0
1_bclustnum_87446_kamer_1_number_1	1.098612289	0	1.098612289	0	0	0	0	0	0	1.897120485	1.098612289	0	0	0	0	0	0	0	0	0	0	0	0	1.098612289	6.651141548	6.642776199	6.575385416	0	0	0
1_bclustnum_8921_kamer_1_number_1	6.404861449	6.514383748	6.487007991	5.018934097	4.964395874	4.959342	1.098612289	0	0	0	0	0	1.098612289	1.609437912	2.197224577	1.504077397	1.098612289	1.098612289	0	1.098612289	1.540445755	3.526360525	3.228826156	3.079613758	0	0	0	0	0	1.098612289
1_bclustnum_89661_kamer_1_number_1	0	0	0	6.902993962	6.785838461	6.743273247	0	0	0	0	0	0	0	0	0	0	0	0	0	0	0	0	0	0	0	0	0	0	0	0
1_bclustnum_95778_kamer_1_number_1	6.57693325	6.712145423	6.580946996	0	0	0	0	0	0	0	0	0	0	0	0	0	0	0	0	0	0	0	0	0	0	0	0	0	0	0
1_bclustnum_99062_kamer_1_number_1	7.080447287	7.077919906	7.126489122	0	0	0	0	0	0	0	0	0	0	0	0	0	0	0	0	0	0	0	0	0	0	0	0	0	0	0
1_bclustnum_99231_kamer_1_number_1	6.550604508	6.557251256	6.597448521	0	0	0	0	0	0	0	0	0	0	0	0	0	0	0	0	0	0	0	0	0	0	0	0	0	0	0
20188_bclustnum_550_kamer_1_number_1	0	0	0	6.781814434	6.782721394	6.820962424	0	0	0	0	0	0	0	0	0	0	0	0	0	0	0	0	0	0	0	0	0	0	0	0
201895_bclustnum_23_kamer_1_number_1	0	0	0	0	0	0	0	0	0	6.529418838	6.053969752	6.08221891	0	0	0	0	0	0	1.098612289	0	0	0	1.098612289	1.098612289	0	0	0	0	0	0
201960_bclustnum_312_kamer_2_number_2	6.35278792	6.713867086	6.544231219	0	0	1.504077397	8.125690158	8.132059982	8.048213038	0	1.609437912	0	0	0	0	0	0	0	9.241286561	8.987821625	9.132126907	0	0	0	0	0	0	1.609437912	1.435084525	1.098612289
201991_bclustnum_92_kamer_1_number_1	6.66949809	6.605636159	6.649632009	6.233429853	6.245137303	6.174306802	0	0	0	0	0	0	1.488076733	1.098612289	1.098612289	0	0	0	0	0	0	1.558144618	0	0	1.098612289	0	0	0	0	0
20199_bclustnum_126_kamer_1_number_1	7.188918651	7.132233939	7.176506794	0	0	0	0	0	1.098612289	0	0	0	1.098612289	0	0	0	0	0	1.098612289	0	0	0	1.609437912	1.098612289	0	0	0	4.470495283	4.465908119	4.705920089
202148_bclustnum_63_kamer_1_number_1	0	0	0	0	0	0	3.713572067	3.563477783	4.054679884	6.500018593	7.070605154	7.153051635	3.07797103	3.60004824	3.295836866	2.73622293	1.92181211	2.575881689	0	1.427117156	1.386294361	3.002851869	2.397895273	2.586688269	0	0	0	3.835860925	4.036651888	4.013922338
202340_bclustnum_93_kamer_3_number_2	0	0	1.098612289	0	0	0	0	1.098612289	0	1.098612289	1.609437912	0	6.583754944	6.549293024	6.651894819	1.098612289	1.098612289	0	1.098612289	0	0	1.098612289	2.014903021	1.504077397	0	0	0	0	0	0
202442_bclustnum_19_kamer_1_number_1	1.098612289	1.098612289	1.945910149	0	0	0	0	0	0	0	0	0	0	0	0	0	0	0	0	0	0	0	0	0	6.581254759	6.572903329	6.649415804	0	0	0
20299_bclustnum_84_kamer_1_number_1	0	0	1.098612289	0	0	0	0	0	0	0	0	0	0	0	0	0	0	0	0	0	0	0	0	0	6.752140695	6.768875897	6.686415101	0	0	0
203765_bclustnum_50_kamer_1_number_1	0	0	0	0	0	0	0	0	0	0	0	0	0	0	0	0	0	0	0	0	0	0	0	0	6.64451343	6.396374501	6.550285734	0	0	0
203872_bclustnum_36_kamer_1_number_1	6.851654658	6.891287425	6.837213709	6.062491349	5.925145776	5.981133869	0	0	0	1.098612289	0	0	0	0	0	0	0	0	0	0	0	0	0	0	0	0	0	0	0	0
20393_bclustnum_17_kamer_1_number_1	1.098612289	0	1.098612289	0	0	0	0	0	0	0	0	0	0	0	0	0	0	0	0	0	0	0	0	0	6.6061095	6.653121061	6.706617808	0	0	0
204034_bclustnum_163_kamer_1_number_1	1.098612289	1.189582763	1.098612289	0	0	0	0	0	0	0	0	0	0	0	0	0	0	0	0	0	0	0	0	0	6.581563814	6.699090158	6.726473182	0	0	0
204382_bclustnum_11_kamer_4_number_2	0	0	0	0	0	0	0	0	0	0	0	0	0	0	1.098612289	0	0	0	0	0	0	0	0	0	6.507491122	6.539379287	6.422550292	0	0	0
204780_bclustnum_29_kamer_1_number_1	0	0	0	1.098612289	0	0	0	0	0	6.045794102	6.676943653	6.591369159	4.89201691	4.773502684	4.854628448	5.06470041	4.558543879	4.691347882	0	0	0	5.260387021	5.124624476	5.178655066	0	0	0	4.011365046	4.007333185	4.259545392
204821_bclustnum_19_kamer_1_number_1	1.609437912	0	1.098612289	0	0	0	0	0	0	0	0	0	0	0	0	0	0	0	0	0	0	0	0	0	6.673297968	6.767343125	6.682609725	0	0	0
205028_bclustnum_131_kamer_1_number_1	0	0	0	0	0	0	1.098612289	1.098612289	1.098612289	4.850223946	6.761483644	6.702999138	0	0	1.098612289	1.098612289	0	0	1.098612289	1.563976003	1.098612289	0	0	0	0	0	0	0	0	1.098612289
20543_bclustnum_404_kamer_1_number_1	0	0	0	6.479661053	6.518040481	6.582025139	0	0	0	0	0	0	1.098612289	0	1.945910149	0	0	0	0	0	0	0	0	0	0	0	0	1.540445755	2.590264665	1.4663363
20646_bclustnum_175_kamer_1_number_1	5.604577052	5.617679776	5.537771179	6.68742028	6.535885476	6.583102121	0	0	0	3.164068997	0	1.540445755	0	1.098612289	0	0	0	1.098612289	1.098612289	1.098612289	0	0	0	0	0	0	0	0	0	0
2064_bclustnum_2782_kamer_1_number_1	1.904238091	0	1.098612289	1.299283893	0	1.098612289	0	0	0	0	0	0	0	1.098612289	0	0	0	0	0	0	0	0	0	0	6.93717815	6.762440448	6.896116814	0	0	0
206515_bclustnum_5_kamer_1_number_1	0	0	0	6.510423505	6.478509642	6.418364936	0	0	0	0	0	0	0	0	0	0	0	0	0	0	0	0	0	0	0	0	0	0	0	0
206545_bclustnum_75_kamer_1_number_1	0	0	0	0	0	0	0	0	0	0	0	0	7.140793714	7.198609814	7.200954603	0	0	0	0	0	0	0	0	0	0	0	0	0	0	0
206607_bclustnum_21_kamer_1_number_1	0	0	0	0	0	0	0	1.098612289	0	6.486922694	6.470971316	6.565617021	0	0	0	0	0	0	0	0	0	0	0	0	0	0	0	3.920558474	4.038026384	3.937411961
206689_bclustnum_38_kamer_1_number_1	0	0	0	0	1.435084525	1.098612289	4.48863637	4.496099463	4.510859507	4.590056548	6.541510403	5.969638073	1.098612289	0	0	0	0	0	4.021773869	4.406719247	4.036008985	0	0	0	0	0	0	0	0	0
206956_bclustnum_57_kamer_1_number_1	0	0	0	7.238855972	7.139858572	7.25894018	0	0	0	0	0	0	0	0	0	1.098612289	0	0	0	0	0	1.386294361	2.120263136	1.609437912	0	0	0	0	0	0
20746_bclustnum_5137_kamer_1_number_1	0	0	0	6.714413219	6.802616961	6.84011863	1.985914895	0	0	0	0	0	0	0	0	0	0	0	1.488076733	2.09714147	1.488076733	0	0	0	0	0	0	0	0	0
207944_bclustnum_15_kamer_25_number_2	0	0	0	0	1.824549292	0	1.488076733	1.488076733	1.098612289	6.417898269	6.554544328	6.625202695	0	0	0	0	0	0	1.609437912	1.609437912	1.098612289	2.833213344	2.988561626	3.347395681	0	0	0	0	0	0
20799_bclustnum_171_kamer_1_number_1	0	0	1.098612289	0	0	1.098612289	4.435707202	4.641559973	4.574710979	4.807392404	6.65782746	6.536777101	4.315580963	4.110873864	4.254599431	0	0	0	4.34989851	4.49391008	4.308031541	0	1.098612289	0	0	0	0	4.215297384	3.909160914	4.085329044
208092_bclustnum_10_kamer_1_number_1	3.455265656	3.096079745	3.44112938	1.098612289	0	1.609437912	5.355014285	5.174894708	5.295533495	6.626717749	6.825218965	6.683110602	1.098612289	0	1.098612289	1.773067525	1.098612289	1.098612289	4.953479233	4.79395415	4.668670669	2.54770929	2.833213344	3.085979659	0	0	0	2.146581364	1.516348465	1.563976003
208562_bclustnum_80_kamer_1_number_1	0	0	0	6.632001777	6.652002014	6.59441346	0	0	0	0	0	0	0	0	0	0	0	0	0	0	0	0	0	0	0	0	0	0	0	0
2085_bclustnum_1802_kamer_1_number_1	6.625961172	6.708781033	6.690486935	0	0	0	0	0	0	0	0	0	0	0	0	0	0	0	0	0	0	0	0	0	0	0	0	0	0	0
20956_bclustnum_54_kamer_6_number_2	6.601909236	6.486160789	6.563150059	0	0	0	0	0	0	0	0	0	0	0	0	0	0	0	0	0	0	0	0	0	0	0	0	0	0	0
2095_bclustnum_932_kamer_1_number_1	0	0	0	0	0	0	0	0	0	6.740350315	7.651529032	7.617548148	1.904238091	1.098612289	1.098612289	1.098612289	0	0	0	0	0	0	1.609437912	0	0	0	0	5.25376969	5.104210637	4.954819508
2099_bclustnum_2496_kamer_16_number_2	0	0	0	6.677712986	6.668863371	6.680540953	0	0	0	0	0	0	0	0	0	0	0	0	0	0	0	0	1.098612289	0	0	0	0	0	0	0
210149_bclustnum_31_kamer_1_number_1	1.098612289	0	0	0	1.098612289	1.098612289	0	0	0	0	0	0	0	0	0	0	0	0	0	0	0	0	0	0	7.058018412	7.072667841	7.098259929	0	0	0
210331_bclustnum_32_kamer_1_number_1	0	0	0	1.098612289	0	1.504077397	4.021221746	3.853183414	4.313377008	4.605836964	6.501074933	6.465477317	0	0	0	0	1.098612289	1.545924999	2.043074453	1.408767439	2.929287938	1.710789804	1.836211667	1.098612289	0	0	0	1.098612289	0	0
210485_bclustnum_7_kamer_1_number_1	0	0	0	0	0	0	4.921199162	4.718498871	4.827080978	6.214145992	7.185326408	7.167693526	4.164077382	3.570813566	4.097119043	4.891506353	4.779123493	4.943291063	5.670146405	5.780505833	5.639450154	5.974234458	5.891644212	5.914402601	1.098612289	0	0	4.412246626	4.506855898	4.467995594
210556_bclustnum_369_kamer_1_number_1	0	0	0	0	0	0	1.098612289	1.098612289	1.098612289	6.442341102	7.644498204	7.608185871	1.734601644	2.104134154	1.405341801	1.098612289	1.41706602	0	1.098612289	1.252762968	1.098612289	1.098612289	0	0	0	0	0	1.435084525	1.526056303	1.098612289
210615_bclustnum_83_kamer_1_number_1	1.609437912	1.945910149	3.044522438	0	1.098612289	1.098612289	0	1.609437912	1.098612289	5.874368775	6.559817767	6.495481545	0	0	1.098612289	0	0	1.098612289	0	1.098612289	0	0	1.609437912	0	0	0	1.098612289	0	0	0
211197_bclustnum_14_kamer_1_number_1	2.120263136	2.614962217	1.098612289	0	0	0	0	0	0	6.258305316	7.029477214	6.942156706	0	0	0	0	0	0	0	1.098612289	0	0	1.098612289	0	0	0	0	0	0	0
211316_bclustnum_11_kamer_1_number_1	0	0	0	0	0	0	3.044522438	3.663561646	2.197224577	0	0	1.098612289	0	0	0	0	0	0	1.945910149	2.397895273	2.803360381	0	0	0	0	0	0	6.788521191	6.76688272	6.765730779
211390_bclustnum_44_kamer_1_number_1	1.098612289	1.098612289	0	1.098612289	0	0	5.39740676	5.532729192	5.530749644	6.744844508	6.969480471	6.92428786	3.344037791	2.852629507	2.507377283	0	0	0	5.634789603	5.763098005	5.694852723	0	0	1.098612289	0	0	0	2.240709689	2.683511577	2.061422673
2115_bclustnum_108_kamer_4_number_2	0	0	0	0	0	0	0	0	0	5.530749644	6.7247671	6.677502769	0	0	0	0	0	0	0	0	0	0	0	0	0	0	0	0	0	0
211620_bclustnum_4_kamer_1_number_1	0	0	0	0	0	0	3.204225024	3.4042228	3.518307598	4.369447852	6.53306183	6.496020558	0	0	0	0	0	0	2.36427832	2.461919457	1.745238977	0	0	0	0	0	0	0	0	0
21205_bclustnum_307_kamer_1_number_1	6.543624034	6.534660551	6.615797412	0	0	0	0	0	0	0	0	0	0	0	0	0	0	0	0	0	0	0	0	0	0	0	0	0	0	0
213239_bclustnum_29_kamer_1_number_1	0	0	0	0	1.098612289	0	0	0	0	6.780773817	6.751101469	6.771935556	1.098612289	0	0	0	0	0	0	0	1.098612289	0	0	0	0	0	0	0	0	0
213340_bclustnum_3_kamer_1_number_1	0	0	0	0	1.098612289	0	5.344246298	5.18961795	5.392718042	0	1.098612289	0	0	0	0	0	0	0	6.973355736	6.814103723	6.721184708	0	0	0	0	0	0	0	0	0
21352_bclustnum_2702_kamer_1_number_1	0	0	0	0	0	0	0	0	0	6.275388943	6.472860845	6.593957816	5.332718793	5.173320876	5.470870534	0	0	0	0	0	0	0	0	0	0	0	0	0	0	0
214065_bclustnum_110_kamer_1_number_1	6.458730056	6.553933404	6.605297921	6.173265135	6.150069577	6.03667689	0	0	0	0	0	0	0	0	0	0	0	0	0	0	0	0	0	0	0	0	0	0	0	0
21436_bclustnum_309_kamer_1_number_1	0	0	0	1.098612289	0	0	0	0	0	0	0	0	0	0	0	0	0	0	0	0	0	0	0	0	6.659507999	6.618515995	6.609574285	0	0	0
214499_bclustnum_52_kamer_1_number_1	0	0	1.098612289	1.098612289	0	0	6.450154416	6.46987028	6.705910784	5.205104985	4.901980469	4.560870276	2.014903021	1.435084525	1.098612289	1.582409925	1.774952351	2.149311528	5.962722936	6.132675439	6.512404845	1.945910149	2.470089076	2.360854001	0	0	0	1.098612289	0	0
214739_bclustnum_136_kamer_1_number_1	0	1.098612289	0	3.044522438	3.433987204	3.044522438	4.73522429	4.813987607	4.858089992	4.533731111	6.692634459	6.59441346	4.615120517	4.223509979	4.371746474	1.887069649	0	1.098612289	5.476927879	5.488478943	5.069602072	4.552120613	4.398555527	4.398555527	0	0	0	4.689309108	5.017279837	4.991187404
214885_bclustnum_2_kamer_1_number_1	0	0	0	0	0	0	0	1.945910149	1.098612289	5.738505911	6.72815003	6.655182917	0	0	0	1.824549292	2.610069793	2.730026934	0	0	1.098612289	2.908719078	3.135494216	3.060269232	0	0	0	2.079441542	1.098612289	2.197224577
21491_bclustnum_58_kamer_1_number_1	0	0	0	0	0	0	5.05987615	5.026698914	5.252273428	6.621405652	7.057527817	6.995115762	4.835146342	5.102478866	4.631948427	0	0	1.098612289	5.381214458	5.579729826	5.353212666	4.565835626	4.469186646	4.626373792	0	0	0	0	0	0
215992_bclustnum_82_kamer_1_number_1	0	0	1.098612289	1.098612289	0	0	0	0	1.098612289	5.901723083	6.523027655	6.494578008	4.168214411	4.010962953	3.955082495	3.45946629	3.621670704	3.632309103	0	0	0	2.564949357	1.880313545	2.747270914	0	0	0	2.397895273	2.397895273	2.112964563
216058_bclustnum_32_kamer_1_number_1	1.504077397	1.773067525	0	0	0	0	0	0	0	1.413693065	0	0	0	0	0	0	0	0	0	0	0	0	0	0	6.918517162	6.895038766	6.936342736	0	0	0
2160_bclustnum_4247_kamer_5_number_2	6.510471116	6.517248732	6.505356465	0	0	0	0	0	0	0	0	0	0	0	0	1.098612289	0	0	0	0	0	0	0	0	0	0	0	0	0	0
21655_bclustnum_45_kamer_1_number_1	6.625961172	6.552507887	6.532958551	6.392288904	6.317365028	6.336825731	0	0	0	0	0	0	0	0	0	0	0	0	0	0	0	0	0	0	0	0	0	1.098612289	0	0
216751_bclustnum_30_kamer_1_number_1	0	0	0	0	0	1.098612289	0	0	0	0	0	0	0	0	0	0	0	0	0	0	0	0	0	0	6.64650869	6.539980386	6.65544035	0	0	0
217098_bclustnum_37_kamer_1_number_1	0	0	0	6.666193142	6.646650221	6.689847994	0	0	2.014903021	0	1.349925976	0	0	0	0	0	0	0	0	0	1.098612289	0	0	0	0	0	0	0	0	0
21717_bclustnum_317_kamer_1_number_1	0	0	0	6.505036397	6.53306183	6.622071209	1.098612289	0	0	0	0	1.098612289	1.550598322	0	1.098612289	0	0	0	0	0	0	0	1.098612289	0	0	0	0	0	0	0
21726_bclustnum_247_kamer_1_number_1	4.171586428	4.226169291	4.05887454	0	0	0	1.493926046	1.504077397	0	6.728628613	6.156978986	6.19099755	3.895216565	4.199705578	4.121744077	1.265665091	1.098612289	0	0	0	0	0	0	0	0	0	0	0	0	0
217622_bclustnum_17_kamer_1_number_1	0	0	0	0	0	0	0	0	0	0	1.098612289	0	0	0	0	0	1.098612289	0	0	0	0	0	0	0	0	0	0	6.588926478	6.578259053	6.363889801
217872_bclustnum_21_kamer_1_number_1	0	0	0	0	0	0	3.995137299	3.949494112	3.983921252	4.641183839	6.647904952	6.688354714	5.006178712	5.151364884	5.273855602	0	0	0	1.098612289	0	0	3.416233766	3.63038397	3.610917913	0	0	1.098612289	2.944438979	3.433987204	2.961828998
218326_bclustnum_66_kamer_1_number_1	0	0	0	0	0	0	0	0	0	6.166547468	7.785305183	7.766599085	3.964886766	4.246451727	3.774400972	3.160034113	2.496744637	2.799023718	0	0	0	3.787432099	3.487812291	3.868219487	0	0	0	2.781480325	3.160034113	3.610917913
218540_bclustnum_63_kamer_1_number_1	0	1.098612289	0	0	0	0	5.269573182	5.113991803	5.347635963	6.542312005	6.815518272	6.777773009	6.098573034	6.092062992	6.093068516	0	1.098612289	0	5.758201213	5.607844098	5.827965726	1.540445755	1.652922599	1.098612289	1.098612289	0	0	5.614342697	5.593059458	5.372701015
218767_bclustnum_2_kamer_1_number_1	0	0	0	0	0	0	0	0	0	4.752356672	6.675823222	6.724004301	0	0	0	0	0	0	0	0	0	0	0	0	0	0	0	0	0	0
218905_bclustnum_13_kamer_1_number_1	1.349925976	1.504077397	1.609437912	0	0	0	0	0	0	0	0	0	0	0	0	0	0	0	0	0	1.609437912	0	0	0	7.106335609	7.130634795	7.103231598	0	0	0
21907_bclustnum_233_kamer_1_number_1	6.54359237	6.434190115	6.546148192	0	0	0	0	0	0	0	0	0	0	0	0	0	0	0	0	0	0	0	0	0	0	0	0	0	0	0
219126_bclustnum_12_kamer_1_number_1	6.650648967	6.681570859	6.695445332	1.098612289	1.098612289	0	0	0	0	0	0	0	0	0	0	0	0	0	0	0	0	0	0	0	0	0	0	2.251291799	2.48490665	2.48490665
219172_bclustnum_31_kamer_1_number_1	0	0	0	0	0	0	0	0	0	6.16101532	6.477112353	6.520621128	0	0	0	0	0	0	0	0	0	0	0	1.098612289	0	0	0	0	0	0
220324_bclustnum_47_kamer_34_number_2	1.098612289	0	1.609437912	0	0	0	0	0	0	0	0	0	0	0	0	0	0	0	0	0	0	0	0	0	6.740012139	6.699676433	6.829793738	1.098612289	0	0
220386_bclustnum_57_kamer_1_number_1	0	0	0	6.570322581	6.61636233	6.588315562	0	0	0	0	0	0	0	0	0	0	0	0	0	1.098612289	0	0	0	0	0	0	0	0	0	0
220478_bclustnum_30_kamer_1_number_1	1.098612289	1.791759469	2.251291799	0	1.098612289	0	1.098612289	0	0	11.39583756	0	0	1.098612289	1.609437912	1.098612289	0	0	0	0	0	0	0	0	0	3.713572067	2.737246478	3.044522438	0	0	0
22112_bclustnum_393_kamer_1_number_1	6.677502769	6.727032843	6.856251436	0	0	0	0	0	0	2.00148	2.525728644	3.020424886	0	0	0	0	0	0	0	0	0	0	0	0	0	0	0	0	0	0
221153_bclustnum_16_kamer_1_number_1	0	0	0	0	0	0	0	0	0	5.846438775	6.877468222	6.794959412	0	0	0	0	0	0	0	0	0	0	0	0	0	0	0	0	0	0
22124_bclustnum_384_kamer_1_number_1	0	0	0	0	0	0	0	0	1.098612289	6.315687061	6.789074215	6.807492857	1.776491843	2.240709689	1.824549292	1.550598322	1.098612289	1.791759469	1.435084525	2.054123734	1.609437912	0	0	0	0	0	0	1.098612289	1.540445755	1.098612289
221286_bclustnum_67_kamer_1_number_1	0	0	0	0	0	0	0	0	0	5.300460069	6.559143455	6.601682462	0	0	0	0	0	0	0	0	1.098612289	0	0	0	0	0	0	0	0	0
22132_bclustnum_47_kamer_1_number_1	1.904238091	0	0	0	0	0	1.669156712	0	0	5.200197243	7.17654501	7.069874128	1.098612289	1.098612289	0	0	1.386294361	0	0	0	0	0	0	0	0	0	0	0	0	0
221466_bclustnum_46_kamer_1_number_1	6.499787041	6.627379782	6.558197803	0	0	0	0	0	0	0	0	0	0	0	0	1.098612289	0	0	0	0	0	0	0	0	0	0	0	0	0	0
221627_bclustnum_86_kamer_1_number_1	1.386294361	1.526056303	1.098612289	6.843264757	6.827629235	6.789483999	0	0	0	0	0	0	0	0	0	0	0	0	0	0	0	0	0	0	0	0	0	0	0	0
221636_bclustnum_2_kamer_1_number_1	0	0	0	0	0	0	0	0	0	0	0	0	7.402939207	7.380131092	7.354618216	0	0	0	0	0	0	0	0	0	0	0	0	0	0	0
222001_bclustnum_42_kamer_1_number_1	6.860813555	6.844510853	6.795545807	0	0	0	0	0	0	0	0	0	0	0	0	0	0	0	0	0	0	0	0	0	0	0	0	0	0	0
222115_bclustnum_61_kamer_1_number_1	6.630419499	6.65544035	6.617670322	0	0	0	0	0	0	0	0	0	0	0	0	0	0	0	0	0	0	0	0	0	0	0	0	0	0	0
222236_bclustnum_47_kamer_1_number_1	0	0	0	0	0	0	0	0	0	0	0	0	0	0	0	6.159799158	6.309918278	6.244166901	0	0	0	6.37559195	6.506381789	6.335054251	0	0	0	0	0	0
22223_bclustnum_7483_kamer_1_number_1	0	1.098612289	0	3.788724789	3.845408731	3.91424254	5.305114216	5.312309025	5.477224768	6.815540204	6.739551989	6.674676284	6.060185715	6.126272937	6.047802347	5.591326475	5.532669862	5.463446137	4.536501548	4.655692183	4.563400868	6.132215131	6.101338611	6.054225708	0	0	0	4.87241483	4.919980926	4.792777747
222_bclustnum_0_kamer_1_number_1	0	0	0	0	0	0	3.044522438	3.79854967	3.462891236	3.465735903	6.423690047	6.515789148	4.961571092	5.035178302	5.023281657	0	1.098612289	1.098612289	1.098612289	0	0	4.911985544	4.87241483	4.914660227	0	0	0	0	0	0
222_bclustnum_153_kamer_1_number_1	0	0	0	0	0	0	2.197224577	3.610917913	3.663561646	4.281284604	6.769948474	6.754370972	5.234669116	5.233400107	5.266140189	3.98030389	3.416634284	3.607308705	0	0	0	5.891829278	5.867976833	5.814927229	0	0	0	2.854376061	3.275426276	3.583518938
223360_bclustnum_72_kamer_1_number_1	0	0	0	0	0	0	2.397895273	1.904238091	1.945910149	6.724176132	7.236339343	7.151258165	1.098612289	0	1.098612289	1.098612289	1.098612289	2.197224577	0	1.098612289	1.098612289	1.752538623	1.734601644	1.609437912	0	0	0	0	1.098612289	1.098612289
223508_bclustnum_253_kamer_1_number_1	1.098612289	1.098612289	0	1.098612289	0	0	0	0	0	0	0	0	0	1.098612289	0	0	0	0	0	0	0	0	0	1.098612289	6.697527953	6.620872887	6.661854741	1.098612289	0	0
2241_bclustnum_422_kamer_1_number_1	0	0	0	6.632001777	6.487684018	6.512487996	0	0	0	0	0	0	0	0	0	0	0	0	0	0	0	0	0	0	0	0	0	0	0	0
2244_bclustnum_683_kamer_2_number_2	0	1.098612289	0	6.498282149	6.527957918	6.487684018	0	0	0	0	1.098612289	0	0	0	0	0	0	0	0	0	0	0	0	1.098612289	0	0	1.098612289	0	0	0
224578_bclustnum_140_kamer_1_number_1	0	0	0	6.508438233	6.647364067	6.503455492	0	0	0	0	0	0	0	0	0	0	0	0	0	0	0	0	0	0	0	0	0	0	0	0
224718_bclustnum_12_kamer_1_number_1	0	0	1.452252967	1.098612289	0	0	3.484312288	3.524096198	3.247047257	5.358155797	6.488254632	6.766384092	4.580877493	4.389808775	4.38618423	3.533686565	2.931193752	3.11905549	4.713683726	4.503506163	4.270163076	4.48187197	4.526126979	4.101462503	3.015534901	2.95099638	2.595254707	3.253277252	3.951243719	4.087655574
22491_bclustnum_130_kamer_1_number_1	0	0	0	0	0	0	0	0	0	6.367042449	7.279546396	6.96389929	0	0	0	0	0	0	0	0	0	0	0	0	0	0	0	0	0	0
225347_bclustnum_13_kamer_1_number_1	0	0	0	0	0	0	4.84103251	4.842611042	4.917056947	5.291292752	5.569614689	5.285232127	5.988460038	6.027208068	5.873243916	5.77019424	5.462135452	5.605802066	5.046002438	4.861361591	4.995860009	6.368873057	6.50578406	6.50578406	0	0	0	3.286534473	3.020424886	3.277144733
225380_bclustnum_4_kamer_1_number_1	0	0	0	0	0	0	3.900848806	3.74557401	3.750811456	6.480351263	6.599266235	6.637258031	0	0	1.098612289	0	0	0	3.776585798	3.831053702	3.944813473	0	0	0	0	0	0	2.793205969	2.598562662	2.335374593
2253_bclustnum_9617_kamer_1_number_1	0	0	0	0	0	0	2.25878262	1.550598322	1.098612289	5.891337535	5.592683302	5.569614689	6.544231219	6.590453509	6.552191146	0	0	1.098612289	0	1.098612289	0	0	1.098612289	1.098612289	0	0	0	4.136055761	3.796737847	3.953377978
225534_bclustnum_89_kamer_1_number_1	6.849066283	6.888415465	6.908293134	0	0	0	0	0	0	0	0	0	0	0	0	0	0	0	0	0	0	0	0	0	0	0	0	0	0	0
2257_bclustnum_922_kamer_5_number_2	0	0	0	0	0	0	4.229264366	4.209654914	4.253245371	6.774985882	6.168913837	6.129775437	4.798538832	4.727387819	4.91754731	3.57421748	3.401197382	3.412246119	4.248495242	3.905334688	4.3609728	2.662585501	3.028523709	2.120263136	0	0	0	4.510859507	4.663439094	4.510859507
225950_bclustnum_31_kamer_1_number_1	0	0	0	0	0	0	2.079441542	2.079441542	2.268683886	5.736572297	7.174211161	7.124743928	0	0	0	0	0	0	5.041274419	5.168590157	5.015072104	0	0	0	0	0	0	0	0	0
22608_bclustnum_193_kamer_1_number_1	6.712956201	6.625245142	6.546785411	0	0	0	0	0	0	1.098612289	0	0	0	0	0	0	0	0	0	0	0	0	0	0	0	0	0	0	0	0
226220_bclustnum_88_kamer_1_number_1	0	0	0	0	0	0	3.36729583	3.414442608	3.451430948	6.251903883	6.945137765	6.913647883	1.098612289	0	1.098612289	0	0	0	3.822695494	3.949494112	4.043051268	0	1.550598322	1.098612289	0	0	0	0	1.098612289	0
226315_bclustnum_17_kamer_1_number_1	0	0	0	3.135494216	3.135494216	3.610917913	2.564949357	1.945910149	2.944438979	4.451659968	6.772639775	6.828795402	5.393277485	5.303304908	5.491158399	1.098612289	0	0	0	0	0	1.864785308	2.134704758	1.829499921	0	0	0	4.323622592	4.394449155	4.558723025
226697_bclustnum_15_kamer_1_number_1	0	0	1.098612289	0	0	0	0	0	0	0	0	0	4.186619838	4.314521049	4.323395961	0	0	0	0	0	0	0	0	0	7.094649698	6.877089865	6.877089865	0	0	0
226852_bclustnum_22_kamer_1_number_1	1.504077397	1.504077397	2.335374593	2.251291799	1.504077397	1.504077397	7.190027746	7.282073658	7.100381889	1.824549292	0	0	0	0	0	0	0	0	7.293697721	6.615682247	6.907088056	0	0	0	1.098612289	0	1.098612289	0	1.098612289	1.098612289
22732_bclustnum_503_kamer_1_number_1	1.098612289	1.488076733	0	0	0	0	0	0	0	0	0	0	0	0	0	0	0	0	0	0	0	0	0	0	6.658378116	6.608386516	6.608386516	0	0	0
227628_bclustnum_52_kamer_1_number_1	6.722362611	6.77397014	6.722629795	4.20800355	3.95763288	4.3204464	0	0	0	0	0	0	0	0	0	0	0	0	0	0	0	0	0	0	0	0	0	0	0	0
22762_bclustnum_154_kamer_8_number_2	0	0	0	6.601035806	6.597924389	6.600259539	0	0	0	0	0	0	0	0	0	0	0	0	0	0	0	0	0	0	0	0	0	0	0	0
22801_bclustnum_107_kamer_1_number_1	1.609437912	2.351375257	1.791759469	1.609437912	1.098612289	0	0	1.098612289	1.609437912	6.207126179	7.083178094	7.105581022	0	0	0	0	0	0	0	0	0	1.098612289	1.098612289	0	1.504077397	0	1.098612289	0	0	1.098612289
22820_bclustnum_148_kamer_1_number_1	0	0	0	0	0	0	5.954800563	5.925471636	5.896403586	6.666193142	6.532334292	7.11450112	0	0	0	0	0	0	6.295433884	6.297779445	6.160631206	0	0	0	0	0	0	0	0	0
2283_bclustnum_518_kamer_1_number_1	0	0	0	6.56667243	6.54448722	6.617135563	0	0	0	1.098612289	0	0	0	0	0	0	0	0	0	0	0	0	0	0	0	0	0	0	0	0
229056_bclustnum_37_kamer_3_number_2	6.774876245	6.703888481	6.677623618	0	0	0	0	0	0	0	0	0	0	0	0	0	0	0	0	0	0	0	0	0	0	0	0	0	0	0
2295_bclustnum_3099_kamer_1_number_1	6.674981758	6.602135958	6.539585956	0	0	0	0	0	0	0	0	0	0	0	0	0	1.098612289	0	0	0	0	0	1.098612289	0	0	0	0	0	0	0
229648_bclustnum_4_kamer_1_number_1	0	0	0	0	0	0	0	0	0	0	0	0	0	0	0	0	0	0	0	0	0	0	0	0	0	0	0	6.52013058	6.487938172	6.467958009
229_bclustnum_3693_kamer_1_number_1	0	0	0	6.635290172	6.703494815	6.887042237	1.098612289	0	0	0	0	0	0	0	0	0	0	0	0	0	0	0	0	0	0	0	0	0	0	0
230130_bclustnum_91_kamer_1_number_1	0	0	0	0	1.098612289	0	1.098612289	0	0	6.320253773	7.133639072	7.096365355	2.530166781	1.609437912	2.120263136	0	1.098612289	0	4.705657849	4.718498871	4.417117437	0	0	1.098612289	0	0	0	0	0	0
230132_bclustnum_20_kamer_1_number_1	2.737246478	2.530166781	3.115983372	1.098612289	1.4663363	1.098612289	4.540836444	4.633106313	4.579852378	5.862209711	7.414374066	7.491550656	5.465948208	5.579099439	5.453182077	3.423177375	3.591065392	3.012259936	5.292530656	4.933365405	4.613596584	4.977988128	4.905274778	5.002724083	1.386294361	1.386294361	0	4.471638793	4.548599834	4.454347296
230299_bclustnum_11_kamer_1_number_1	0	0	0	0	0	0	0	0	0	6.177713797	6.937857623	6.933315808	0	0	0	0	0	0	0	0	0	0	0	0	0	0	0	0	0	0
230548_bclustnum_130_kamer_1_number_1	0	0	0	6.709827374	6.675462501	6.553322106	0	0	0	0	0	0	0	0	0	0	0	0	0	0	0	0	0	0	0	0	0	0	0	0
230594_bclustnum_5_kamer_5_number_2	6.775137754	6.552507887	6.750633523	0	0	0	0	0	0	0	0	0	0	0	0	0	0	0	0	0	0	0	0	0	0	0	0	0	0	0
230702_bclustnum_32_kamer_3_number_2	0	0	0	0	0	0	1.845826164	0	0	6.697651341	7.207859871	7.127292335	0	0	0	0	0	0	0	0	1.098612289	0	0	0	0	0	0	0	0	0
23075_bclustnum_138_kamer_1_number_1	0	1.098612289	0	6.736175423	6.662280481	6.662565485	0	0	0	0	0	0	0	1.098612289	0	0	0	0	0	0	0	0	0	0	0	0	0	0	0	0
230871_bclustnum_17_kamer_1_number_1	0	0	0	0	0	0	0	0	0	0	0	0	0	0	0	0	0	0	0	0	0	0	0	0	6.49677499	6.40577872	6.553933404	0	0	0
231400_bclustnum_44_kamer_1_number_1	0	0	0	0	0	0	0	0	0	6.377746836	6.457665643	6.505356465	0	0	0	0	0	0	0	0	0	1.098612289	1.098612289	0	0	0	0	0	0	0
231649_bclustnum_124_kamer_1_number_1	0	0	0	7.08068285	7.037317555	7.016412355	0	0	0	0	0	0	0	0	0	0	0	0	0	0	0	0	0	0	0	0	0	1.098612289	1.098612289	0
231807_bclustnum_148_kamer_1_number_1	0	0	0	0	0	0	0	0	0	6.142037406	6.409187553	6.560323202	1.098612289	0	0	0	0	0	0	0	0	0	0	0	0	0	0	0	0	0
231811_bclustnum_8_kamer_1_number_1	1.098612289	1.526056303	1.223775432	1.098612289	0	0	3.489751457	3.529622845	3.790368234	6.489204931	6.625127081	6.40385065	0	0	0	4.493440542	5.139151632	5.204006687	3.240461176	3.339321978	3.287573186	4.754667197	5.099866428	5.046189036	0	0	0	0	1.609437912	1.098612289
232083_bclustnum_46_kamer_1_number_1	6.345771439	6.50371166	6.416606458	0	0	0	0	0	1.098612289	0	0	0	1.421386371	1.098612289	1.4663363	0	0	0	0	1.098612289	0	0	0	0	0	0	0	0	0	0
232228_bclustnum_14_kamer_1_number_1	0	0	0	0	0	0	0	0	0	1.098612289	0	0	6.509099932	6.420537126	6.555041052	0	1.421386371	1.098612289	0	0	0	0	0	0	0	0	0	0	0	1.236761337
232550_bclustnum_37_kamer_9_number_2	6.649308332	6.606987967	6.616065185	0	0	0	0	0	0	0	0	0	0	0	0	0	0	0	0	0	0	0	0	0	0	0	0	0	0	0
232916_bclustnum_85_kamer_1_number_1	1.098612289	0	0	1.098612289	0	0	0	0	0	1.098612289	0	0	0	1.098612289	0	0	0	0	0	0	0	1.098612289	0	0	6.525029658	6.49617149	6.498583309	0	0	0
232946_bclustnum_36_kamer_1_number_1	6.53560405	6.606987967	6.459513142	5.533389489	5.517452896	5.566434284	1.098612289	0	1.098612289	0	1.435084525	0	1.098612289	1.098612289	1.098612289	0	0	0	0	1.098612289	0	0	0	0	0	0	0	0	0	0
23299_bclustnum_72_kamer_1_number_1	6.658011046	6.749345542	6.692703898	0	0	0	0	0	0	0	1.098612289	1.526056303	0	0	0	0	0	0	0	0	0	0	0	0	0	0	0	0	0	0
23345_bclustnum_137_kamer_1_number_1	6.93084661	6.836650178	6.829007483	0	0	0	0	1.098612289	1.488076733	0	0	0	0	0	0	0	0	0	1.860752118	1.098612289	2.131627125	0	0	0	0	0	0	0	0	0
23389_bclustnum_207_kamer_1_number_1	1.098612289	0	0	0	0	0	0	0	0	0	0	0	0	0	0	0	0	0	0	0	0	0	0	0	5.882084854	6.570882962	6.671399834	0	0	0
234026_bclustnum_3_kamer_1_number_1	0	0	1.098612289	0	0	0	0	0	0	0	0	0	0	0	0	1.098612289	0	0	0	0	0	0	0	0	7.20284733	7.117002725	7.168965031	0	0	0
234073_bclustnum_38_kamer_17_number_2	6.773938131	6.767343125	6.799891633	0	0	0	0	0	0	0	0	0	0	0	0	0	0	0	0	0	0	0	0	0	0	0	0	0	0	0
2344_bclustnum_2290_kamer_1_number_1	0	0	0	1.098612289	0	0	5.28447196	5.221706264	5.147494477	6.82355812	6.795705775	6.696725558	5.702948794	5.738183901	5.823045895	4.850075229	5.032070575	5.275560379	5.710427017	5.937536205	5.655117303	5.865759591	5.717849732	5.760477818	0	0	1.098612289	5.153291594	5.297066585	5.177561165
234627_bclustnum_44_kamer_1_number_1	0	0	0	0	0	0	0	0	0	6.508497863	6.808536972	6.860377467	2.197224577	1.945910149	1.098612289	0	0	0	0	0	0	0	0	1.098612289	0	0	0	0	0	0
235220_bclustnum_36_kamer_1_number_1	6.389041962	6.518656017	6.35138472	0	1.098612289	0	0	0	0	0	0	0	0	0	0	0	0	0	0	0	0	0	0	0	0	0	0	0	0	0
235519_bclustnum_98_kamer_1_number_1	1.098612289	1.098612289	1.252762968	0	0	1.098612289	0	0	0	0	0	0	0	0	0	0	0	0	0	0	0	0	0	0	6.672908511	6.657417802	6.807594554	0	0	0
235781_bclustnum_20_kamer_1_number_1	0	0	0	0	0	0	0	0	0	0	0	0	0	0	0	7.254036394	7.590346946	7.391538532	0	0	0	7.49676342	7.535083119	7.519149958	0	0	0	0	0	0
235963_bclustnum_62_kamer_2_number_2	0	0	0	6.837690047	6.933101337	6.909084395	0	0	0	0	0	0	0	0	0	0	0	0	0	0	0	0	0	0	0	0	0	0	0	0
236079_bclustnum_3_kamer_1_number_1	0	1.098612289	0	0	1.609437912	1.945910149	0	0	0	6.278521424	6.763060088	6.800010813	0	0	0	0	0	0	0	0	0	0	0	1.098612289	0	0	1.098612289	0	1.098612289	1.098612289
236368_bclustnum_9_kamer_1_number_1	6.906310235	6.856345136	6.867512283	0	0	0	0	0	0	0	0	0	0	0	0	0	0	0	0	0	0	0	0	0	0	0	0	0	0	0
236607_bclustnum_39_kamer_1_number_1	0	0	1.098612289	0	0	0	0	0	0	0	0	1.098612289	0	0	0	0	0	1.098612289	0	0	0	0	1.435084525	1.4663363	7.127212042	7.048907559	7.169965685	0	0	0
236906_bclustnum_25_kamer_9_number_2	0	1.421386371	0	1.098612289	0	0	3.948491859	4.343805422	4.08236813	5.902242547	6.886531643	6.857814753	5.117993812	5.0360236	5.182586599	2.708050201	2.708050201	2.628797737	5.396867746	5.277384801	5.149985558	4.96284463	4.994309416	4.890349128	6.575871897	6.559817767	6.527748831	3.844050328	3.920558474	4.027900226
2373_bclustnum_9472_kamer_1_number_1	6.353983879	6.554725113	6.459556976	6.401917197	6.434190115	6.389681786	0	0	1.098612289	0	0	1.098612289	0	0	0	0	0	1.098612289	0	0	1.098612289	0	1.098612289	0	4.262679877	4.293498654	4.216562195	0	0	0
238555_bclustnum_27_kamer_1_number_1	6.215607599	6.178462652	6.12249281	5.938195618	6.061456919	6.1014394	4.382026635	4.427836171	4.421848129	6.457946357	7.663642489	7.687309487	4.649187071	4.524502283	4.561740628	4.828313737	4.795790546	4.74927053	5.167639043	5.108971195	5.013963084	5.40829222	5.377590547	5.511410582	5.765191103	5.854355333	5.733341277	4.686750173	4.707275409	4.508108473
2385_bclustnum_8011_kamer_2_number_2	0	0	0	0	0	0	0	0	0	0	0	0	6.607614586	6.517248732	6.546785411	0	0	0	0	0	0	0	0	0	0	0	0	0	0	0
2386_bclustnum_352_kamer_1_number_1	0	0	0	0	0	0	0	0	0	6.287239409	6.703188113	6.586783881	0	0	0	0	0	1.413693065	0	0	0	0	0	0	0	0	0	0	0	0
239472_bclustnum_19_kamer_1_number_1	1.098612289	1.386294361	1.098612289	4.324735124	4.049409956	4.300373151	3.876866183	3.341896675	3.570813566	3.963407896	6.532334292	6.567140675	4.922634337	5.081404365	4.912654886	1.504077397	0	1.098612289	1.722766598	1.408767439	1.098612289	3.973432261	4.151039906	4.241981215	5.208491122	5.198497031	5.125587661	3.620696968	3.204225024	3.79854967
239744_bclustnum_4_kamer_1_number_1	1.098612289	1.609437912	0	0	0	0	0	0	0	0	0	0	0	0	0	0	0	0	0	0	0	0	0	0	6.617594136	6.690842277	6.799374652	0	0	0
239860_bclustnum_26_kamer_1_number_1	1.098612289	1.098612289	0	0	0	0	1.098612289	1.098612289	0	0	0	0	0	0	0	0	0	0	0	0	0	0	0	0	6.42394315	6.552099815	6.488987582	1.098612289	0	0
2399_bclustnum_225_kamer_1_number_1	0	0	0	0	0	1.098612289	1.504077397	1.860752118	1.871802177	1.582409925	1.488076733	1.645156346	2.397895273	2.112964563	2.079441542	6.109396461	5.782183836	5.853543534	1.971552833	1.386294361	2.146581364	6.529224659	6.522779327	6.538526146	2.079441542	1.386294361	1.945910149	1.098612289	1.413693065	0
2400_bclustnum_2528_kamer_1_number_1	0	0	1.098612289	3.020424886	2.772588722	2.708050201	0	1.098612289	0	6.682734968	6.479277397	6.478125544	0	1.098612289	0	0	0	0	0	0	0	0	0	0	0	0	1.098612289	0	1.098612289	1.098612289
240447_bclustnum_61_kamer_1_number_1	0	0	0	0	0	0	0	0	0	5.80814249	6.790996718	6.628305891	2.598562662	2.494122387	2.737246478	0	0	1.098612289	0	0	0	2.530166781	2.146581364	1.526056303	0	0	0	1.098612289	1.563976003	1.098612289
240651_bclustnum_22_kamer_1_number_1	0	0	0	0	0	0	0	1.098612289	0	6.447570487	6.671687316	6.664060745	1.098612289	1.609437912	1.098612289	0	1.098612289	0	0	1.098612289	1.098612289	0	0	0	0	0	0	0	0	0
24072_bclustnum_188_kamer_1_number_1	1.098612289	0	0	6.431733577	6.534515318	6.381064466	0	0	0	0	0	0	0	0	0	0	0	0	0	0	0	0	0	0	0	0	0	0	0	1.098612289
241183_bclustnum_13_kamer_1_number_1	0	0	0	0	0	0	0	1.413693065	1.098612289	6.625961172	6.408528791	6.285998095	1.540445755	1.832581464	1.369486395	0	1.098612289	0	0	0	0	1.098612289	0	0	0	0	0	0	0	0
2411_bclustnum_45_kamer_1_number_1	6.519638318	6.454674841	6.425228765	5.874618884	5.928703113	5.947455187	0	0	0	0	0	0	0	0	0	0	0	0	0	1.098612289	0	0	0	0	0	0	0	0	0	0
241733_bclustnum_48_kamer_1_number_1	0	0	0	6.744731516	6.683718829	6.705639095	0	0	0	0	0	0	0	0	0	0	0	0	0	0	0	0	0	0	0	0	0	0	0	0
242233_bclustnum_22_kamer_1_number_1	0	0	0	6.720220155	6.762986121	6.765294999	0	0	0	0	0	0	0	0	0	0	0	0	0	0	0	0	0	0	0	0	0	0	0	0
242514_bclustnum_5_kamer_1_number_1	0	0	0	6.478509642	6.563008906	6.513230111	0	1.098612289	0	5.265794175	5.528635122	5.541263545	4.648229675	4.802380355	4.790819533	0	0	0	0	0	0	0	0	0	0	0	0	4.411585437	4.359269648	3.891820298
2426_bclustnum_3779_kamer_1_number_1	6.519147288	6.457711127	6.377406989	1.098612289	0	0	0	0	0	1.945910149	0	0	0	0	0	1.098612289	1.098612289	1.098612289	0	0	0	0	0	1.098612289	1.098612289	0	0	0	0	0
24280_bclustnum_165_kamer_1_number_1	6.426046612	6.55079458	6.642226011	0	0	0	0	0	0	0	0	0	0	0	0	0	0	0	0	0	0	0	1.098612289	0	0	0	1.098612289	0	0	0
24283_bclustnum_307_kamer_1_number_1	0	0	0	0	1.098612289	0	5.828945618	5.972679202	5.932245187	3.536115729	1.609437912	1.098612289	1.504077397	1.098612289	1.098612289	6.229003979	6.201016145	5.997695097	6.511085379	6.652863029	6.137247457	6.854881789	6.644570678	6.711605349	2.45673863	2.901421594	2.681021529	0	0	0
242951_bclustnum_9_kamer_10_number_2	0	0	0	0	0	0	0	0	0	6.363372872	6.869129829	6.868899059	0	0	0	0	0	0	0	0	0	0	1.098612289	0	0	0	0	1.421386371	1.609437912	2.397895273
2429_bclustnum_655_kamer_1_number_1	2.079441542	2.397895273	2.197224577	1.609437912	2.197224577	1.945910149	5.038250461	5.108366783	5.191845122	6.12967311	6.377067026	6.541029999	0	0	0	0	0	0	5.47478851	5.67057034	5.408963887	0	0	0	1.098612289	0	0	1.098612289	1.098612289	1.609437912
243016_bclustnum_65_kamer_1_number_1	0	1.098612289	1.098612289	6.540205706	6.520199831	6.505356465	0	0	0	0	0	0	0	0	0	0	0	0	0	0	0	0	0	0	0	0	0	0	0	0
243321_bclustnum_71_kamer_1_number_1	0	0	1.098612289	0	0	0	1.098612289	1.098612289	1.098612289	6.969057318	7.311959593	7.327267923	0	0	0	0	0	0	1.098612289	1.540445755	0	0	0	0	0	0	0	0	0	0
24332_bclustnum_69_kamer_1_number_1	7.219275941	7.235136316	7.239573847	0	0	0	0	0	0	0	0	0	0	0	0	0	0	0	0	0	0	0	0	0	0	0	0	0	0	0
243423_bclustnum_15_kamer_1_number_1	6.704589585	6.715383386	6.664591402	0	0	0	0	0	0	0	0	0	0	0	0	0	0	0	0	0	0	0	0	0	0	0	0	0	0	0
243706_bclustnum_21_kamer_1_number_1	0	0	0	0	0	0	0	1.098612289	0	6.399592773	6.856251436	6.85414351	0	0	0	0	0	0	0	0	0	0	0	0	0	0	0	0	0	0
243_bclustnum_8142_kamer_1_number_1	6.962773627	6.877639312	6.92527098	0	0	0	1.32175584	0	1.098612289	0	0	0	0	0	0	2.079441542	1.887069649	1.609437912	0	1.098612289	1.098612289	2.533696814	2.923161581	1.969441112	0	0	0	0	0	0
244013_bclustnum_31_kamer_1_number_1	4.260665173	4.260665173	4.389143748	1.098612289	1.098612289	1.098612289	4.185859671	3.873801793	3.740641389	5.575350439	6.701414763	6.785211303	5.254887809	5.289528861	5.404365146	4.59511985	4.334190515	4.336946891	5.374060073	4.973099561	5.229326281	4.110873864	3.977810746	4.03004068	4.624315735	4.705359353	4.783592484	4.019382123	4.139158578	4.064970676
24426_bclustnum_3525_kamer_1_number_1	6.489710882	6.55079458	6.442540166	0	1.098612289	0	0	0	0	1.098612289	0	0	0	0	0	0	0	0	0	0	0	0	0	0	0	0	0	0	0	0
244290_bclustnum_52_kamer_1_number_1	0	0	0	6.816005055	6.735119464	6.77040747	1.098612289	0	0	0	0	0	0	0	0	0	0	0	0	0	0	0	0	0	0	0	0	0	0	0
244424_bclustnum_27_kamer_1_number_1	0	0	0	0	0	0	1.098612289	0	0	6.055931191	6.761467439	6.697819125	0	1.098612289	0	1.098612289	0	0	1.481604541	1.098612289	0	0	0	1.098612289	0	0	0	0	1.098612289	0
244504_bclustnum_38_kamer_1_number_1	0	0	0	0	0	0	1.098612289	0	1.526056303	6.22763488	6.551238894	6.58953702	0	0	0	0	0	0	2.27923765	2.833213344	3.555348061	0	0	0	0	0	0	0	0	0
244586_bclustnum_20_kamer_1_number_1	0	0	0	0	0	1.098612289	5.153291594	4.980863136	4.97535348	6.945051064	7.589538129	7.56351207	0	0	0	0	0	0	4.935911748	4.526126979	4.968423445	1.421386371	0	0	0	0	0	1.098612289	0	1.098612289
244596_bclustnum_55_kamer_1_number_1	0	1.098612289	0	0	0	0	0	0	0	0	0	0	0	0	0	0	0	0	0	0	0	0	0	0	6.644440563	6.648660663	6.66057515	0	0	0
24471_bclustnum_352_kamer_1_number_1	0	0	0	0	0	0	5.217649463	5.211304171	5.294143669	5.945046193	6.398594935	6.331247369	1.299283893	1.098612289	1.098612289	0	1.098612289	1.299283893	6.597145702	6.399704136	6.200509174	0	0	0	0	0	0	2.233591864	2.427745295	2.397895273
244853_bclustnum_22_kamer_1_number_1	6.993015123	7.059712126	6.928733685	0	0	0	0	0	0	0	0	0	0	0	0	0	1.098612289	2.31677001	0	0	0	1.098612289	1.098612289	0	0	0	0	0	0	0
24490_bclustnum_63_kamer_1_number_1	0	0	0	0	0	0	0	1.098612289	0	6.206759378	6.695798917	6.670203425	0	0	0	1.540445755	1.098612289	1.446918983	0	0	0	1.098612289	1.609437912	1.098612289	0	0	0	0	0	0
245195_bclustnum_65_kamer_1_number_1	0	0	0	0	0	0	0	0	1.098612289	6.765294999	6.360727183	5.911338503	0	0	0	0	0	0	0	0	0	0	0	0	0	0	0	0	0	0
24535_bclustnum_638_kamer_1_number_1	1.299283893	1.098612289	2.274933281	0	0	0	0	0	0	0	0	0	0	0	1.098612289	0	0	0	0	0	0	0	0	0	7.013465733	7.030123343	7.024052767	0	0	0
245556_bclustnum_3_kamer_1_number_1	0	0	0	0	0	0	1.098612289	1.098612289	0	0	0	0	0	1.504077397	2.140066163	0	0	0	1.098612289	0	0	0	0	0	0	0	0	7.100299407	7.144935849	7.188918651
245680_bclustnum_54_kamer_1_number_1	0	0	0	0	0	0	4.563400868	4.143134726	4.534747722	0	0	0	0	0	0	0	0	0	7.037905963	6.789196943	6.798609832	0	0	0	0	0	0	0	0	0
245750_bclustnum_16_kamer_1_number_1	6.517999136	6.525517808	6.513394786	0	0	0	0	0	0	1.717651753	1.609437912	1.904238091	0	0	0	0	0	0	1.386294361	1.550598322	0	0	0	0	0	0	0	0	0	0
246497_bclustnum_25_kamer_36_number_2	4.097672352	4.17438727	4.050044303	6.707269344	6.56948142	6.570416467	0	0	0	0	0	0	0	0	0	0	0	0	0	0	0	0	0	0	0	0	0	0	0	0
246718_bclustnum_94_kamer_25_number_2	7.138073034	7.059041861	7.109331928	0	0	0	0	0	0	0	0	0	0	0	0	0	0	0	0	0	0	0	0	0	0	0	0	0	0	0
246_bclustnum_2430_kamer_1_number_1	6.959398512	6.980485159	6.978418754	0	1.098612289	0	0	0	0	0	0	0	0	0	0	0	0	0	0	0	0	0	0	0	0	0	0	0	0	0
247047_bclustnum_48_kamer_1_number_1	0	0	0	0	0	0	2.890371758	2.505525937	2.957511061	6.283964371	6.680540953	6.599870499	0	1.526056303	1.609437912	2.079441542	1.609437912	1.791759469	3.228826156	3.044522438	3.384390263	1.609437912	1.098612289	1.098612289	0	0	0	1.609437912	1.098612289	1.609437912
247166_bclustnum_25_kamer_1_number_1	0	0	0	6.443070281	6.363602077	6.503789546	0	0	0	0	0	0	3.044522438	3.157000421	2.862200881	0	0	0	0	0	0	0	0	0	0	0	0	0	0	0
247513_bclustnum_8_kamer_1_number_1	1.098612289	0	1.860752118	0	0	1.098612289	4.7886827	4.510859507	4.839680886	6.029590912	6.989602511	6.89986725	1.098612289	0	0	1.945910149	2.197224577	1.815290432	1.421386371	1.985914895	1.860752118	2.496744637	2.86627258	2.024381953	0	0	0	0	0	0
247545_bclustnum_12_kamer_1_number_1	6.608000625	6.560323202	6.648336672	1.098612289	0	0	0	0	0	0	0	0	0	0	0	0	0	0	0	0	0	0	0	0	0	0	0	1.609437912	0	0
247905_bclustnum_7_kamer_1_number_1	6.638422491	6.657440922	6.549015347	0	0	0	0	0	0	0	0	0	0	0	0	1.558144618	2.014903021	2.48490665	0	0	0	2.397895273	1.717651753	1.098612289	0	0	0	0	0	0
247937_bclustnum_78_kamer_1_number_1	0	0	0	0	0	0	2.967559111	2.693126055	2.806724413	6.2407085	7.096448162	7.114680013	0	0	0	1.900959106	1.945910149	1.697730801	4.803110795	4.525404857	4.748404354	1.098612289	2.058387707	2.014903021	0	0	0	0	0	0
248133_bclustnum_4_kamer_1_number_1	0	0	0	0	0	0	1.098612289	0	1.098612289	6.90475077	6.852695955	6.743049254	0	0	0	0	0	0	0	1.609437912	1.098612289	0	0	0	0	0	0	0	0	0
24861_bclustnum_179_kamer_1_number_1	6.32773855	6.383694117	6.54350025	0	0	0	0	0	1.098612289	0	0	0	0	0	0	0	0	0	0	0	0	0	0	0	0	0	0	0	0	0
248854_bclustnum_16_kamer_1_number_1	6.429488806	6.391917113	6.588468326	0	0	0	1.098612289	1.386294361	0	0	0	0	0	0	0	0	0	0	1.810108426	1.749199855	1.4663363	0	0	0	0	0	0	0	0	0
24889_bclustnum_94_kamer_1_number_1	6.685860947	6.66684101	6.780025311	0	0	0	1.098612289	0	0	0	0	0	0	0	0	0	0	0	0	0	0	0	0	0	0	0	1.609437912	0	0	0
24918_bclustnum_82_kamer_1_number_1	4.819386003	5.002267044	4.784712885	6.630829813	6.588926478	6.600172494	0	0	0	0	0	0	0	0	0	0	0	0	0	0	0	0	0	0	0	0	0	0	0	0
24997_bclustnum_247_kamer_1_number_1	6.578075521	6.599033414	6.546785411	0	0	0	0	0	0	0	0	0	0	0	0	0	0	0	0	0	0	0	0	0	0	0	0	0	0	0
249997_bclustnum_12_kamer_2_number_2	6.739336627	6.77107608	6.748759547	0	0	0	0	0	0	0	0	0	0	0	0	0	0	0	0	0	0	0	0	0	0	0	0	0	0	0
2499_bclustnum_1165_kamer_1_number_1	6.563229096	6.551238894	6.566047762	0	0	0	0	0	0	0	0	0	0	0	1.098612289	1.098612289	0	0	0	0	0	0	0	0	0	0	0	0	1.098612289	0
250452_bclustnum_18_kamer_1_number_1	0	0	0	0	0	0	0	0	0	0	1.098612289	1.098612289	1.098612289	0	0	6.35533653	6.641471945	6.531687795	0	0	0	6.428822302	6.397669382	6.367233043	0	0	0	1.098612289	1.478102963	0
250778_bclustnum_46_kamer_1_number_1	0	0	0	6.617402978	6.537053851	6.518409553	0	0	0	0	0	0	0	0	0	0	0	0	0	0	0	0	0	0	0	0	0	0	0	0
251405_bclustnum_33_kamer_1_number_1	0	0	0	6.955316116	6.647688374	6.635158844	0	0	0	0	0	0	0	0	0	0	0	0	0	0	0	0	0	0	0	0	0	0	0	0
25145_bclustnum_42_kamer_1_number_1	0	0	0	0	0	0	4.390915759	4.559873612	4.571761272	6.483325982	6.491589624	6.567877049	5.982496958	6.094857879	5.971626569	4.670152359	4.270695553	4.328851307	3.377099342	3.347395681	3.618609875	3.741066224	4.022796644	3.970291914	0	0	0	4.105394948	4.138589492	4.270695553
25149_bclustnum_34_kamer_1_number_1	0	0	0	0	0	0	5.274705794	5.404176258	5.38907173	6.636821501	7.253703901	7.227422819	1.609437912	1.098612289	0	1.098612289	1.098612289	1.540445755	5.711529059	5.818101741	5.701556666	1.845826164	0	0	0	0	1.098612289	0	0	0
25159_bclustnum_104_kamer_1_number_1	0	1.609437912	0	0	0	0	0	0	0	0	0	0	0	0	0	0	0	0	0	0	0	0	0	0	6.670766321	6.765500231	6.628402422	0	0	0
251701_bclustnum_63_kamer_1_number_1	6.639875834	6.588926478	5.933128087	0	0	1.098612289	0	0	1.098612289	0	0	0	0	0	0	0	0	0	0	0	1.098612289	0	0	1.098612289	0	0	0	0	0	0
252219_bclustnum_26_kamer_1_number_1	0	0	0	0	0	0	0	0	0	6.820562067	7.166652	7.064331586	2.437500527	1.925290445	2.100061237	0	1.098612289	1.609437912	0	0	0	2.036882362	0	2.00148	0	0	0	0	0	0
252499_bclustnum_23_kamer_1_number_1	0	0	0	1.098612289	0	0	1.098612289	2.1690537	1.945910149	5.754475589	7.353850363	7.325807503	0	0	0	0	0	0	1.981001469	1.609437912	2.079441542	0	0	0	0	0	0	0	0	0
25264_bclustnum_25_kamer_4_number_2	6.660254996	6.686173008	6.757223045	0	0	0	0	0	0	0	0	0	0	0	0	0	0	0	0	0	0	0	0	0	0	0	0	0	0	0
252919_bclustnum_9_kamer_1_number_1	0	0	1.098612289	0	0	0	0	1.098612289	1.098612289	4.648507415	7.215975003	7.150097354	0	1.35812377	1.098612289	0	0	0	0	0	1.098612289	0	0	0	0	0	0	0	0	0
253139_bclustnum_5_kamer_1_number_1	0	0	0	0	0	0	0	0	0	6.042038833	6.739632442	6.745824412	3.942967255	3.754533759	3.618609875	0	0	0	0	0	0	0	1.098612289	0	0	0	0	1.098612289	1.609437912	1.098612289
253515_bclustnum_7_kamer_1_number_1	0	0	1.098612289	0	0	0	4.66029264	4.699470765	4.721467674	6.535241271	6.35630035	6.380686784	1.098612289	1.098612289	0	2.564949357	3.115983372	3.448220907	4.750715373	4.78122213	4.912654886	3.64631897	4.250081127	4.031285835	0	0	0	0	0	0
253647_bclustnum_20_kamer_1_number_1	0	0	0	0	0	0	0	0	1.098612289	5.381214458	6.542760103	6.403243017	1.609437912	0	1.098612289	1.098612289	0	0	0	0	1.098612289	0	1.098612289	0	0	0	0	0	0	0
254163_bclustnum_9_kamer_1_number_1	1.563976003	0	0	0	1.098612289	0	0	0	0	0	0	0	0	0	0	0	0	0	0	0	0	0	0	0	6.540767338	6.529418838	6.631043479	0	0	1.098612289
25458_bclustnum_188_kamer_1_number_1	0	0	0	0	0	0	4.532599493	4.766821239	4.38995016	7.072574561	7.483295033	7.423896749	1.335001067	1.563976003	1.098612289	0	0	0	1.098612289	2.112964563	2.068012731	0	1.098612289	0	0	0	0	4.415824014	4.197201948	3.951243719
254820_bclustnum_130_kamer_1_number_1	0	0	0	1.098612289	1.098612289	1.098612289	0	1.098612289	0	5.730563961	6.73459166	6.847651709	0	0	0	0	0	0	0	0	0	0	1.098612289	1.098612289	0	0	0	0	0	0
2552_bclustnum_490_kamer_1_number_1	0	0	0	0	0	0	0	0	0	5.097424424	6.509960677	6.573680167	0	0	0	1.098612289	0	0	1.098612289	0	0	1.098612289	0	0	0	0	0	0	0	0
255459_bclustnum_86_kamer_1_number_1	6.634257466	6.757098654	6.633882748	1.098612289	0	0	0	0	0	2.944438979	2.63108996	2.437500527	0	0	1.098612289	0	0	0	0	0	0	0	0	0	0	0	0	0	0	0
256283_bclustnum_11_kamer_1_number_1	0	0	0	1.098612289	0	1.098612289	7.660316938	7.802483195	7.797426844	0	0	1.098612289	0	0	0	1.189582763	1.098612289	0	7.207541302	7.417982724	7.226834269	1.098612289	1.349925976	0	0	0	0	0	0	0
256885_bclustnum_98_kamer_1_number_1	6.586171655	6.658866905	6.607100085	0	0	0	0	0	0	0	0	0	0	0	0	0	0	0	0	0	0	1.488076733	1.098612289	1.516348465	0	0	0	0	0	0
256972_bclustnum_25_kamer_1_number_1	0	1.609437912	1.098612289	0	0	0	2.397895273	2.708050201	2.397895273	6.938158385	7.279091223	7.309433225	0	0	0	0	0	0	0	0	0	0	0	0	0	0	0	0	0	1.098612289
257190_bclustnum_23_kamer_22_number_3	0	0	0	0	0	0	0	0	0	7.041122908	6.754604099	6.697445274	0	1.098612289	0	0	0	0	0	0	0	0	0	0	0	0	0	0	0	0
257638_bclustnum_112_kamer_1_number_1	0	0	0	0	0	0	0	0	0	0	0	0	1.335001067	2.397895273	1.098612289	6.090857291	5.66919103	5.75827066	0	0	0	6.844602464	6.823068471	6.757397397	0	0	1.098612289	0	0	1.098612289
257925_bclustnum_64_kamer_1_number_1	6.534660551	6.646650221	6.565546621	5.357529226	5.150976779	5.103518288	0	0	0	0	0	0	0	0	0	2.151762203	2.590264665	2.63108996	0	0	0	2.468099531	3.152736022	2.151762203	0	0	0	1.098612289	0	0
258912_bclustnum_13_kamer_1_number_1	1.609437912	0	1.435084525	1.098612289	1.098612289	1.516348465	4.934473933	4.930545363	4.844187086	6.629740989	6.630803431	6.649338114	0	0	0	1.757857918	1.098612289	1.349925976	6.259581464	6.232090389	6.252953429	1.098612289	1.722766598	1.704748092	0	0	0	1.098612289	0	0
259031_bclustnum_36_kamer_1_number_1	6.934679546	6.938837193	6.928674929	0	0	0	0	0	0	0	0	0	0	0	0	0	0	0	0	0	0	0	0	0	0	0	0	0	0	0
259070_bclustnum_17_kamer_1_number_1	1.945910149	0	1.609437912	0	1.098612289	0	0	0	0	0	0	0	0	0	0	0	0	0	0	0	0	0	0	0	6.56354236	6.558197803	6.645379614	0	0	0
259184_bclustnum_120_kamer_46_number_3	6.011617603	6.103835184	6.058120356	6.806671162	6.748089921	6.705989095	0	0	0	0	0	0	0	0	0	0	0	0	0	0	0	0	0	0	0	0	0	0	0	0
2591_bclustnum_1141_kamer_4_number_2	6.754895432	6.773080376	6.762151305	0	0	0	0	0	0	0	0	0	0	0	0	0	0	0	0	0	0	0	0	0	0	0	0	0	0	0
259206_bclustnum_42_kamer_11_number_2	6.725513719	6.660062855	6.717804695	0	0	0	0	0	0	0	0	0	0	0	0	0	0	0	0	0	0	0	0	0	0	0	0	0	0	0
259206_bclustnum_42_kamer_1_number_1	6.473582007	6.550222825	6.472964341	0	0	0	0	0	0	0	0	0	0	0	0	0	1.35812377	1.810108426	0	0	0	2.313634819	3.115983372	2.54770929	0	0	0	0	0	0
259391_bclustnum_32_kamer_1_number_1	0	0	0	0	0	0	5.113378387	5.37278456	5.525452939	6.595552346	6.841971182	6.855408799	0	0	1.098612289	1.098612289	0	0	6.236068175	6.29682567	6.480634878	0	0	0	0	0	1.098612289	0	0	0
259399_bclustnum_21_kamer_1_number_1	0	0	0	0	0	0	1.413693065	1.349925976	1.098612289	6.605839047	7.626959994	7.645875825	0	0	0	0	0	1.098612289	1.516348465	1.945910149	1.550598322	1.098612289	0	0	0	0	0	0	0	0
2593_bclustnum_1212_kamer_1_number_1	0	0	0	0	0	0	3.57421748	3.567965272	3.801712481	6.602286626	6.248901307	6.210377161	0	1.098612289	0	0	1.098612289	1.098612289	3.548979252	3.125786377	3.287573186	0	0	1.563976003	0	0	0	4.483630603	4.786566315	4.693382508
2600_bclustnum_141_kamer_1_number_1	4.465908119	4.485173076	4.335781105	0	0	1.098612289	3.635560425	3.916628384	4.032196072	4.303025364	6.466862973	6.515396901	4.888196437	5.163905586	5.081404365	1.488076733	0	0	4.633232724	4.669946179	3.987558958	4.766114877	4.720559247	4.68141801	1.098612289	0	0	3.976080786	3.713572067	3.670860585
2600_bclustnum_349_kamer_1_number_1	4.767858601	4.663439094	4.647587707	0	0	0	4.0831707	3.864233041	3.628776415	4.30676415	6.626717749	6.661854741	5.072250797	5.179911012	5.252273428	0	0	1.098612289	3.147023154	3.012259936	2.634281659	4.760745565	4.668144985	4.637956783	1.098612289	1.098612289	0	4.154409027	4.373657965	4.164077382
26138_bclustnum_142_kamer_1_number_1	6.731912688	6.762729507	6.786999078	1.098612289	1.386294361	1.540445755	0	0	0	0	0	0	0	0	0	0	0	0	0	0	0	0	0	0	0	0	0	0	0	0
261480_bclustnum_26_kamer_1_number_1	0	0	0	0	0	0	1.098612289	1.4663363	1.913649615	6.683861446	7.198849025	7.166605685	5.539520851	5.368570777	5.172374253	0	0	1.098612289	0	1.098612289	1.558144618	1.098612289	0	0	0	0	0	4.626060457	4.784712885	4.691347882
261568_bclustnum_17_kamer_1_number_1	0	0	0	0	0	0	0	0	0	0	0	0	0	0	0	0	0	0	0	0	0	7.086595784	7.03555905	6.9103918	0	0	0	0	0	0
261733_bclustnum_24_kamer_1_number_1	0	0	0	0	0	0	0	1.098612289	0	6.159480092	6.542183735	6.70073111	0	0	0	0	0	0	0	0	0	0	0	0	0	0	0	1.098612289	0	0
262004_bclustnum_45_kamer_1_number_1	6.531039422	6.460947728	6.424509154	6.447305863	6.412912906	6.221472485	0	0	0	1.694594904	1.098612289	0	0	0	0	1.516348465	0	1.098612289	1.098612289	0	0	0	1.098612289	0	0	0	0	0	0	0
26232_bclustnum_66_kamer_1_number_1	1.609437912	0	1.4663363	0	0	0	0	0	0	0	1.871802177	1.880313545	0	0	1.791759469	0	0	0	0	0	0	0	0	0	7.049836269	7.057613904	7.095619779	0	0	0
26244_bclustnum_495_kamer_1_number_1	0	0	0	0	0	0	0	0	0	6.309554576	6.77346131	6.620194533	4.88196066	4.77162486	4.803110795	4.555788747	4.757032535	4.387014176	0	0	0	5.407171771	5.507589148	5.397157672	0	0	0	2.581897235	2.708050201	2.564949357
262652_bclustnum_48_kamer_1_number_1	0	0	0	0	0	0	3.44112938	2.931193752	3.305053521	2.708050201	2.545531272	2.327277706	1.609437912	0	1.504077397	0	0	0	3.590439381	3.31216214	3.589059119	0	0	0	0	0	0	6.577513592	6.647688374	6.086449674
262756_bclustnum_14_kamer_1_number_1	0	0	0	0	0	0	6.565546621	6.614993661	6.593866114	0	0	0	0	0	0	0	0	0	1.098612289	0	0	0	0	0	0	0	0	0	0	0
26275_bclustnum_57_kamer_1_number_1	1.609437912	0	1.446918983	0	0	0	0	0	0	0	0	0	0	0	0	0	0	0	0	0	0	1.098612289	1.098612289	0	6.820623167	6.894163325	6.802024695	0	0	0
262802_bclustnum_17_kamer_1_number_1	0	0	0	0	0	0	0	0	0	0	0	0	0	0	1.098612289	1.098612289	0	0	0	0	0	0	1.098612289	1.098612289	0	0	0	6.698761151	6.599053839	6.585343726
263544_bclustnum_27_kamer_1_number_1	0	0	0	0	0	0	1.871802177	1.609437912	1.504077397	6.293419279	6.915018835	6.887406643	0	0	0	0	0	0	0	1.609437912	0	0	0	0	0	0	0	0	0	0
263739_bclustnum_33_kamer_1_number_1	6.801004909	6.973777075	6.951772164	0	0	0	0	0	0	0	0	0	0	0	0	0	0	0	1.098612289	0	1.098612289	0	0	0	0	0	0	1.098612289	1.098612289	0
264234_bclustnum_25_kamer_1_number_1	6.576005673	6.575075841	6.652289962	1.652922599	0	1.098612289	0	0	0	0	0	0	0	0	0	0	0	0	0	0	0	0	0	0	0	0	0	0	0	0
2642_bclustnum_6078_kamer_1_number_1	5.247608112	5.395140038	5.369604937	6.710252671	6.718879087	6.747195605	0	0	0	0	0	0	0	0	0	0	0	0	0	0	0	0	0	0	0	0	0	0	0	0
264330_bclustnum_22_kamer_1_number_1	0	1.098612289	0	0	0	0	0	1.098612289	0	0	0	0	1.098612289	0	0	0	0	0	1.098612289	0	1.098612289	0	0	0	6.799891633	6.651715274	6.781908569	0	0	0
2648_bclustnum_875_kamer_1_number_1	0	0	0	0	1.098612289	0	4.700480366	4.543294782	4.650143552	4.735610556	6.537947331	6.517460025	1.098612289	1.098612289	1.098612289	0	0	0	4.666133574	4.911602862	4.378448993	3.487812291	3.756963246	3.87309297	0	0	0	0	0	0
265314_bclustnum_46_kamer_16_number_2	2.120263136	1.4663363	1.098612289	2.614962217	2.961828998	2.197224577	0	0	0	2.197224577	0	0	0	0	0	0	0	1.098612289	1.609437912	1.098612289	1.098612289	0	0	1.098612289	6.73459166	7.046934443	6.651571874	0	0	0
26545_bclustnum_124_kamer_1_number_1	0	0	0	1.098612289	1.4663363	0	8.025516386	8.017554757	8.194662912	7.907559611	8.215547412	8.22168054	2.311635019	1.971552833	2.1768155	7.291594899	7.19518732	7.173122722	7.964068789	8.178439554	7.960759834	7.488293515	7.471363088	7.497911357	0	0	0	5.154735638	5.116495685	5.237770867
265482_bclustnum_33_kamer_1_number_1	0	0	0	0	0	0	0	0	0	0	0	0	6.620263855	6.599093327	6.569882462	0	0	0	1.098612289	0	0	0	0	1.098612289	0	0	0	1.4663363	1.945910149	2.09714147
265542_bclustnum_18_kamer_1_number_1	0	0	0	0	0	0	1.945910149	2.681021529	1.887069649	6.393925146	7.001063456	6.921066293	1.098612289	1.098612289	0	1.098612289	1.945910149	1.098612289	6.218201634	6.010776858	6.050205042	0	0	0	0	0	0	0	0	0
26643_bclustnum_249_kamer_1_number_1	0	0	0	0	0	0	3.245194432	2.772588722	3.205454156	6.586171655	6.558197803	6.502790046	0	1.609437912	0	0	0	0	0	1.734601644	1.734601644	0	0	0	0	0	0	0	0	0
26670_bclustnum_745_kamer_1_number_1	1.252762968	1.098612289	1.098612289	0	0	0	0	0	0	0	0	0	0	0	0	0	0	0	0	0	0	0	0	0	6.598357791	6.424544822	6.780489928	0	0	0
266874_bclustnum_13_kamer_1_number_1	0	0	0	0	0	0	0	0	0	6.364320372	6.767999987	6.828247678	0	0	0	2.415913778	2.036882362	2.240709689	0	0	0	1.421386371	1.871802177	1.810108426	0	0	0	0	0	0
267472_bclustnum_42_kamer_51_number_2	6.872719636	6.83102865	6.804138797	6.341869626	6.309137974	6.31277057	1.540445755	0	1.540445755	0	0	0	0	0	1.098612289	1.098612289	0	1.098612289	0	1.098612289	0	0	1.098612289	1.824549292	0	0	0	5.172374253	5.075173815	5.075173815
26757_bclustnum_1848_kamer_1_number_1	6.044666394	6.065444297	6.658011046	0	0	0	0	0	1.098612289	1.098612289	1.488076733	1.717651753	0	0	0	0	0	0	0	1.098612289	0	0	0	0	0	0	0	0	0	0
267596_bclustnum_72_kamer_1_number_1	6.552507887	6.429182237	6.546785411	6.54333614	6.474816194	6.778784898	0	0	0	0	0	0	0	0	0	0	0	0	0	0	0	0	0	0	1.098612289	0	1.609437912	0	0	0
267876_bclustnum_11_kamer_1_number_1	0	0	0	0	0	0	3.531251486	3.588138806	3.545779572	6.487177041	6.821470547	6.812894998	0	1.098612289	0	1.098612289	0	0	4.339467455	4.557379173	4.467822377	0	0	0	0	0	0	0	0	0
26801_bclustnum_584_kamer_1_number_1	6.526913513	6.720621763	6.626717749	6.488698724	6.581100889	6.421622268	0	1.098612289	0	1.871802177	1.098612289	0	2.751537441	2.662585501	2.036882362	0	1.098612289	0	1.734601644	1.098612289	1.4663363	1.098612289	2.120263136	1.098612289	1.098612289	0	0	1.897120485	1.945910149	1.609437912
268249_bclustnum_94_kamer_1_number_1	6.837690047	6.839832906	6.892641641	6.596539788	6.637548946	6.536530715	0	0	0	1.540445755	0	0	1.098612289	0	0	0	1.098612289	1.098612289	0	0	0	0	0	0	0	1.098612289	0	0	0	0
268268_bclustnum_14_kamer_5_number_2	0	1.098612289	0	0	0	0	0	0	0	0	0	0	0	0	0	0	0	0	0	0	0	0	0	0	6.903412864	6.885169121	6.957183335	0	1.098612289	0
268323_bclustnum_44_kamer_1_number_1	0	1.609437912	0	0	0	0	1.098612289	0	1.098612289	6.218998447	6.66057515	6.630419499	0	0	1.098612289	1.609437912	0	1.098612289	2.151762203	1.098612289	1.098612289	1.945910149	1.098612289	1.945910149	0	0	0	1.609437912	1.704748092	1.609437912
2684_bclustnum_3831_kamer_1_number_1	6.521157066	6.536295867	6.650279049	0	0	1.098612289	0	1.098612289	0	0	0	0	0	0	0	0	0	0	0	0	0	0	0	0	0	0	0	0	0	0
2685_bclustnum_2005_kamer_1_number_1	1.694594904	1.098612289	0	0	0	0	0	0	0	0	0	0	0	0	0	0	0	0	0	0	0	0	0	0	6.595325492	6.752659319	6.632586587	0	0	0
2685_bclustnum_9_kamer_1_number_1	1.098612289	0	0	0	0	0	0	0	0	5.926259137	6.502790046	6.428509068	0	0	0	0	1.098612289	0	0	0	0	0	0	0	0	0	0	0	0	0
268728_bclustnum_12_kamer_8_number_2	6.557251256	6.521111434	6.562914322	6.250617893	6.288477328	6.319567934	0	0	0	0	0	0	0	0	0	0	0	0	0	0	0	0	0	0	0	0	0	4.598480862	4.716711561	4.621702767
2687_bclustnum_211_kamer_1_number_1	0	0	0	0	0	0	4.894633172	4.572130332	4.850912452	6.504288174	6.550059814	6.588140749	3.80666249	3.825530039	3.641339633	0	0	0	4.435906207	4.634728988	4.826023116	1.098612289	0	0	0	0	0	4.091960055	4.032976122	3.731699451
269009_bclustnum_12_kamer_1_number_1	0	0	0	6.221385083	6.645523906	6.851608118	0	0	0	0	0	0	0	0	0	0	0	0	0	0	0	0	0	0	0	0	0	0	0	0
2690_bclustnum_3551_kamer_1_number_1	0	0	0	6.915525016	6.98416061	6.88202713	0	0	0	0	0	0	0	0	0	0	0	0	0	0	0	0	0	0	0	0	0	0	0	0
269308_bclustnum_17_kamer_1_number_1	1.098612289	0	0	0	0	0	3.970291914	4.007333185	4.040122422	5.984356847	7.144012469	7.158124817	1.098612289	1.098612289	0	0	1.098612289	0	5.642499094	5.52012803	5.49100171	0	0	0	0	0	0	4.137830206	4.194692034	4.17950186
26933_bclustnum_662_kamer_1_number_1	0	0	0	0	0	0	4.898906395	4.930357559	5.223954747	6.518093636	7.041157913	7.047891065	1.098612289	1.098612289	0	2.745435898	1.815290432	2.31677001	3.07577652	3.506556897	2.726917751	3.283415596	2.890371758	2.649212731	0	0	0	0	0	0
269355_bclustnum_23_kamer_1_number_1	0	0	0	6.622293407	6.523562306	6.588621066	0	0	0	1.098612289	0	0	0	0	0	0	0	0	0	1.098612289	0	0	0	0	0	0	0	0	0	0
269705_bclustnum_15_kamer_1_number_1	0	0	0	0	0	0	1.098612289	1.098612289	1.098612289	5.216743905	6.734115923	5.896694971	1.098612289	0	1.098612289	0	2.197224577	1.749199855	4.48111716	4.031285835	4.950786205	1.4663363	2.014903021	1.819158984	0	0	0	0	0	0
2702_bclustnum_2484_kamer_1_number_1	1.098612289	1.098612289	0	6.891287425	6.843631605	6.843157023	0	0	0	0	0	0	0	0	0	0	0	0	0	0	0	0	0	0	0	0	0	0	0	0
270332_bclustnum_26_kamer_1_number_1	4.116322925	3.375879574	4.310799125	0	0	0	5.260096154	5.174736305	5.220355825	6.635454309	7.184341014	7.123672785	5.183187059	5.196423059	5.178266135	3.676300672	3.586985146	3.876395828	6.159359624	5.884018525	5.648093569	4.889408837	4.909893724	5.021410367	0	0	0	3.449987546	3.530030254	3.590439381
2706_bclustnum_4772_kamer_16_number_2	0	0	0	0	0	0	0	1.098612289	0	0	0	0	6.586171655	6.547502514	6.561030666	0	0	1.098612289	0	0	0	1.098612289	1.749199855	1.540445755	0	0	0	5.202632116	5.214935758	5.166213526
2713_bclustnum_194_kamer_3_number_2	0	0	1.098612289	0	0	0	4.036008985	3.977810746	4.180522258	6.685860947	6.142037406	6.055846806	0	0	0	0	1.098612289	1.098612289	4.180522258	3.947390149	4.317488114	0	0	0	0	0	0	0	0	0
271439_bclustnum_35_kamer_1_number_1	0	1.098612289	0	0	0	0	0	0	0	0	0	0	0	0	0	0	0	0	0	0	0	0	0	0	6.556541112	6.702574428	6.662707318	0	0	0
271448_bclustnum_22_kamer_1_number_1	6.89831082	6.864638988	6.860873293	1.098612289	0	1.098612289	0	0	0	1.098612289	0	0	0	0	0	1.098612289	0	0	0	0	0	1.098612289	1.098612289	1.824549292	0	0	0	1.098612289	0	0
271764_bclustnum_26_kamer_1_number_1	0	1.098612289	0	1.098612289	1.098612289	0	0	0	0	0	1.098612289	0	0	0	0	0	0	0	0	0	0	0	0	0	6.716594774	6.63752012	6.662110462	0	0	0
27178_bclustnum_652_kamer_1_number_1	0	0	0	0	0	0	0	1.098612289	0	6.489321946	7.347943823	7.333375893	0	1.098612289	1.098612289	2.367123927	2.383810178	2.155981198	0	0	1.098612289	1.609437912	1.824549292	2.00148	0	0	0	0	0	0
271995_bclustnum_34_kamer_2_number_2	6.512116732	6.469637839	6.491102825	6.65415252	6.585136637	6.610359514	0	0	0	2.047692843	0	1.386294361	0	1.945910149	0	1.098612289	1.504077397	1.098612289	0	1.098612289	0	1.098612289	0	1.609437912	0	0	0	0	0	0
272175_bclustnum_82_kamer_1_number_1	0	0	0	0	0	0	1.860752118	2.054123734	2.054123734	6.944858367	6.993015123	6.954066182	0	1.098612289	0	0	1.098612289	1.098612289	2.533696814	3.034952987	2.879198457	1.098612289	0	0	0	0	0	0	0	0
272431_bclustnum_109_kamer_1_number_1	0	0	0	0	0	0	1.4663363	0	1.098612289	7.070154701	7.641722854	7.639161172	1.098612289	0	0	0	0	1.098612289	0	1.098612289	0	1.609437912	1.098612289	0	0	0	0	0	0	0
273043_bclustnum_70_kamer_11_number_2	0	0	0	0	0	0	4.450464185	4.781917904	4.838921278	6.631562946	6.491228718	6.438284308	0	1.098612289	0	1.098612289	0	0	4.955827058	5.021687328	4.833635551	0	0	0	0	0	0	0	0	0
273182_bclustnum_23_kamer_5_number_2	2.564949357	2.564949357	1.098612289	0	0	0	3.56671182	3.610917913	3.966090648	5.7676958	6.64451343	6.697774714	4.96144505	4.914124394	5.046285538	1.098612289	0	1.609437912	5.741078259	5.656690867	5.319099906	1.098612289	1.098612289	0	1.098612289	0	1.098612289	1.609437912	1.504077397	2.00148
273359_bclustnum_29_kamer_1_number_1	6.988413182	6.945291883	6.805722553	3.766354252	3.921973336	3.725693427	0	0	0	0	0	0	0	0	0	0	0	0	0	0	0	0	0	0	0	0	0	0	0	0
273947_bclustnum_8_kamer_1_number_1	0	0	0	0	0	0	1.299283893	1.098612289	0	2.335374593	1.098612289	0	6.522680861	6.373661028	6.455827296	0	1.098612289	1.280933845	1.609437912	1.098612289	0	0	1.887069649	1.4663363	0	0	0	5.559141985	5.511814541	5.393627546
27421_bclustnum_748_kamer_1_number_1	1.098612289	1.609437912	1.098612289	0	0	0	0	0	0	0	0	0	0	0	0	0	0	0	0	0	0	0	0	0	6.508769137	6.375365477	6.475124503	0	0	0
274717_bclustnum_131_kamer_1_number_1	6.576469569	6.550604508	6.449944217	0	0	0	0	0	0	0	0	0	0	0	0	0	0	0	1.098612289	1.098612289	0	0	0	0	0	0	0	0	0	0
275014_bclustnum_33_kamer_1_number_1	3.812991309	3.097516903	3.663561646	0	0	0	1.098612289	1.791759469	0	6.154327168	5.496795205	5.55554152	5.220355825	5.032070575	5.33753808	5.524456427	6.624729018	6.252385463	0	1.446918983	0	6.095824562	6.057954288	6.081647971	1.098612289	0	0	0	1.098612289	1.098612289
275126_bclustnum_62_kamer_1_number_1	6.603039622	6.590758361	6.659720752	0	0	0	0	0	0	0	0	0	0	0	0	0	0	0	0	0	0	0	0	0	0	0	0	0	0	0
275527_bclustnum_9_kamer_1_number_1	0	0	1.236761337	0	0	0	0	0	0	0	0	0	0	0	0	0	0	0	0	0	0	0	0	0	6.630536937	6.635509452	6.539425538	0	0	0
275714_bclustnum_51_kamer_5_number_2	1.550598322	1.558144618	1.098612289	0	0	0	0	0	0	0	0	0	0	0	0	0	0	0	0	0	0	0	0	0	6.962716837	6.902240098	6.995995068	0	0	0
27606_bclustnum_914_kamer_1_number_1	6.871898023	6.926361112	6.891738696	1.815290432	2.371578364	1.098612289	0	0	0	0	0	0	0	0	0	0	0	1.098612289	0	0	0	0	0	0	0	0	0	2.420368129	1.99242971	1.734601644
27684_bclustnum_65_kamer_1_number_1	0	0	0	0	0	0	0	0	0	6.557133407	5.37296091	5.351858133	1.909542505	1.871802177	1.098612289	0	0	0	0	1.098612289	1.098612289	0	1.098612289	1.098612289	1.609437912	0	0	0	0	0
277324_bclustnum_16_kamer_1_number_1	7.005589543	7.06598904	7.093869634	0	0	0	0	0	0	0	0	0	0	0	0	0	0	0	0	0	0	0	0	0	0	0	0	0	0	0
277715_bclustnum_36_kamer_1_number_1	6.888346134	6.848830836	6.88312134	0	0	0	0	0	0	0	0	0	0	0	0	0	0	0	0	0	0	0	0	0	0	0	0	0	0	0
277927_bclustnum_5_kamer_1_number_1	0	0	0	0	0	0	5.209486153	5.423186349	5.287256419	0	0	0	0	0	0	0	0	0	6.615529566	6.270232002	6.457397402	0	0	0	0	0	0	0	0	0
27935_bclustnum_429_kamer_1_number_1	7.291124733	7.255668955	7.262859991	0	0	0	0	0	0	0	0	0	0	0	0	0	0	0	0	0	0	0	0	0	0	0	0	0	0	0
279513_bclustnum_61_kamer_1_number_1	6.843631605	6.892416235	6.926792908	0	0	0	0	0	0	1.098612289	1.098612289	1.098612289	0	0	0	0	0	0	0	0	0	0	0	0	0	0	0	0	0	0
279856_bclustnum_4_kamer_1_number_1	0	0	0	0	0	0	1.897120485	1.609437912	1.845826164	6.53717409	7.057613904	6.894670039	1.609437912	0	2.564949357	1.609437912	1.098612289	1.098612289	2.268683886	1.945910149	2.233591864	1.098612289	1.504077397	1.609437912	0	0	0	3.36729583	3.433987204	3.135494216
279868_bclustnum_3_kamer_1_number_1	6.954953701	7.098102874	6.707473397	6.905323324	6.065077397	5.936364014	4.939261018	5.034787924	4.834693344	0	4.587006215	4.951118808	0	0	0	2.708050201	2.68881981	2.131627125	2.901421594	3.117949906	3.063390922	2.496744637	3.01693588	2.8982793	6.150069577	6.286370465	6.235880234	4.968423445	5.134621274	4.447346101
280077_bclustnum_92_kamer_7_number_2	6.857514063	6.818194838	6.745236349	0	0	0	0	0	0	0	0	0	0	0	0	0	0	0	0	0	0	0	0	0	0	0	0	0	0	0
280480_bclustnum_45_kamer_1_number_1	0	1.299283893	0	0	1.098612289	1.098612289	0	0	0	0	0	0	0	0	0	0	0	0	0	0	0	0	0	0	6.585619778	6.574796862	6.629891515	0	0	0
280516_bclustnum_14_kamer_1_number_1	0	0	0	0	0	0	0	0	0	0	0	0	6.385568697	6.580242387	6.428912701	0	0	0	0	0	0	0	0	0	0	0	0	0	0	0
280978_bclustnum_30_kamer_1_number_1	0	0	0	0	0	1.098612289	6.790659507	6.841615476	6.633581557	6.184148891	5.296170063	5.92157842	1.098612289	2.397895273	1.098612289	1.526056303	1.098612289	1.435084525	6.655955018	6.614457468	5.807595794	1.757857918	1.686398954	1.098612289	0	0	0	4.709530201	4.564348191	4.672828834
281246_bclustnum_24_kamer_1_number_1	0	0	0	0	0	0	0	0	0	6.396744638	6.662280481	6.41908898	0	0	0	0	0	0	0	0	0	0	0	0	0	0	0	0	0	0
2813_bclustnum_302_kamer_1_number_1	0	0	0	0	0	0	0	0	0	6.155465128	6.517671273	6.39716796	0	0	0	0	0	0	0	1.098612289	0	0	0	0	0	0	0	0	0	1.945910149
282075_bclustnum_16_kamer_1_number_1	1.545924999	1.098612289	1.85629799	1.791759469	2.197224577	2.833213344	3.874173672	3.8534146	3.780936621	3.800293361	6.531502797	6.485289983	5.053509581	5.034163001	5.219582553	1.098612289	1.4663363	1.098612289	4.418840608	4.630555242	3.767822326	4.809856445	4.754822191	4.606598166	0	1.098612289	0	4.110873864	4.087175593	4.221606971
282760_bclustnum_46_kamer_1_number_1	1.504077397	1.734601644	1.673975809	6.532599177	6.53603196	6.539980386	1.098612289	1.098612289	1.098612289	2.468099531	1.098612289	1.609437912	1.609437912	1.098612289	0	1.845826164	0	0	0	1.265665091	1.845826164	2.020944733	2.236834104	2.34703729	0	0	0	0	0	0
282887_bclustnum_25_kamer_1_number_1	6.998281306	6.912245184	6.98425325	1.098612289	1.860752118	0	0	0	0	1.098612289	1.098612289	1.098612289	0	0	0	0	0	0	0	0	0	0	0	0	0	0	0	0	0	0
283886_bclustnum_110_kamer_1_number_1	0	0	0	0	0	0	1.098612289	0	0	6.610696045	6.639003558	6.693013831	1.098612289	1.609437912	0	0	0	1.098612289	0	1.098612289	1.098612289	0	0	0	0	0	0	0	0	0
283901_bclustnum_3_kamer_1_number_1	0	0	0	0	0	0	0	0	0	1.098612289	0	1.098612289	0	0	0	0	0	0	1.098612289	0	0	0	1.098612289	0	6.66854586	6.652863029	6.683360946	0	0	0
283971_bclustnum_15_kamer_1_number_1	0	1.098612289	0	6.756059916	6.763500308	6.886020787	0	0	0	0	0	0	0	1.098612289	0	1.098612289	1.098612289	0	1.098612289	0	0	0	1.609437912	1.098612289	0	0	0	0	0	0
283994_bclustnum_53_kamer_1_number_1	0	0	0	6.591491274	6.472346295	6.564043097	0	0	0	0	0	0	0	0	0	0	0	0	0	0	0	0	0	0	0	0	0	0	0	0
284092_bclustnum_17_kamer_1_number_1	0	0	0	0	0	0	0	0	0	0	0	0	0	0	0	0	0	0	0	0	0	0	0	0	6.945840733	6.93599282	6.88262412	3.135494216	2.833213344	3.218875825
2840_bclustnum_312_kamer_1_number_1	6.679180757	6.719952327	6.611293444	1.098612289	1.098612289	0	1.516348465	1.609437912	1.504077397	1.563976003	0	0	1.098612289	0	0	1.815290432	2.530166781	1.652922599	1.526056303	1.913649615	2.602689685	2.291411905	2.417893959	2.197224577	0	0	0	0	0	0
284259_bclustnum_52_kamer_2_number_2	6.63824051	6.616399801	6.672665657	1.098612289	0	0	0	0	0	0	0	0	0	0	0	0	0	0	0	0	0	0	0	0	0	0	0	0	0	0
284367_bclustnum_15_kamer_1_number_1	6.646576212	6.651017456	6.599481308	0	0	1.098612289	0	0	0	0	0	0	0	0	0	0	0	0	0	0	0	0	0	0	0	0	0	0	0	0
284381_bclustnum_28_kamer_1_number_1	4.204692619	3.703768067	3.63758616	4.917320456	4.970445044	4.969181155	1.098612289	0	0	5.128821212	6.242400293	6.619882522	1.098612289	1.757857918	1.098612289	0	0	1.845826164	1.098612289	1.098612289	1.098612289	0	0	1.098612289	0	0	0	0	1.098612289	0
284405_bclustnum_67_kamer_1_number_1	0	0	1.098612289	0	0	0	0	0	1.098612289	6.249009525	7.003974137	6.866933284	0	0	0	1.504077397	0	1.609437912	0	0	0	1.098612289	1.945910149	1.098612289	0	0	0	0	0	0
284419_bclustnum_10_kamer_1_number_1	0	1.098612289	0	0	0	0	0	1.098612289	0	0	0	0	0	0	0	0	0	0	0	0	0	0	0	0	6.56510862	6.554725113	6.602587892	0	0	0
2845_bclustnum_6462_kamer_1_number_1	0	0	0	3.135494216	3.135494216	3.295836866	4.335109278	4.17438727	4.253245371	5.975505374	6.918032289	6.871782964	4.687266169	4.542112168	4.915100422	4.820281566	4.812184355	4.49980967	4.65396035	4.219507705	4.248495242	5.399668355	5.198497031	5.298317367	0	0	0	4.077537444	4.624972813	4.410775643
284678_bclustnum_5_kamer_1_number_1	3.267665989	3.449987546	3.188416617	6.505452166	6.633756495	6.523888244	0	0	0	0	0	0	0	0	0	0	0	0	0	0	0	0	0	0	0	0	0	0	0	0
2846_bclustnum_3829_kamer_8_number_3	0	0	0	0	0	0	0	0	0	6.556067877	7.184629153	7.133894339	0	0	0	0	0	0	0	0	0	0	0	0	0	0	0	0	0	0
284713_bclustnum_43_kamer_1_number_1	0	1.098612289	0	0	0	1.098612289	0	0	0	5.602937674	6.991176887	6.940870855	5.06470041	5.103250938	4.921600052	3.680512045	3.496507561	3.740311364	0	1.098612289	1.098612289	4.984366607	4.910203354	4.940849251	1.810108426	0	1.609437912	4.20137069	4.332194115	4.287410964
284829_bclustnum_6_kamer_1_number_1	1.098612289	0	0	0	0	0	0	0	0	0	0	0	0	0	0	0	0	0	0	0	0	0	0	0	6.633976112	6.59884957	6.621405652	0	0	0
2848_bclustnum_538_kamer_2_number_2	0	0	0	0	0	0	0	0	0	5.75528958	6.515205903	6.388001585	1.098612289	0	1.098612289	0	0	0	1.098612289	0	0	0	0	0	0	0	0	0	1.832581464	2.047692843
2848_bclustnum_994_kamer_1_number_1	2.197224577	2.397895273	2.197224577	2.197224577	2.197224577	1.609437912	0	1.098612289	1.098612289	5.908082938	6.499787041	6.630117262	0	0	0	0	0	0	0	0	0	0	1.098612289	0	1.609437912	2.014903021	1.098612289	1.32175584	0	0
2851_bclustnum_296_kamer_1_number_1	0	1.098612289	0	0	0	0	0	0	0	0	0	0	1.098612289	0	0	0	0	0	0	0	0	0	0	0	6.698541753	6.717804695	6.743536081	0	0	0
285559_bclustnum_12_kamer_1_number_1	0	0	0	0	0	0	4.964842633	5.028566891	5.007771196	5.935272431	6.890028077	6.758675056	5.661469786	5.721249042	5.929208752	2.09714147	2.669212348	2.944438979	3.443161124	3.579541595	3.825530039	4.317488114	4.134023504	4.452684286	0	0	0	0	0	0
285789_bclustnum_0_kamer_1_number_1	0	0	0	0	0	0	5.520660598	5.073090396	5.279812197	6.805090017	7.65396918	7.266652751	6.735610166	6.713996971	6.651756611	2.785011242	1.540445755	3.012259936	5.552959585	5.767279829	5.794841206	2.662585501	2.681021529	2.595254707	0	0	0	0	1.945910149	0
285789_bclustnum_17_kamer_1_number_1	0	0	0	1.098612289	1.832581464	1.098612289	3.266934293	2.961828998	3.101478715	3.985892235	4.677137297	4.580318936	4.918030119	4.723841716	4.802380355	5.613321518	5.660582655	5.639851769	3.469634543	3.823191792	3.713572067	6.46843448	6.470717457	6.570514547	0	0	0	3.393474302	3.816865814	3.784189634
2858_bclustnum_9161_kamer_1_number_1	6.700060528	6.722191672	6.714280961	0	0	0	0	0	0	0	0	0	0	0	0	0	0	0	0	0	0	0	0	0	0	0	0	0	0	0
286462_bclustnum_35_kamer_1_number_1	1.252762968	1.299283893	2.036882362	1.773067525	1.098612289	0	0	1.098612289	1.098612289	2.963395015	1.832581464	1.734601644	1.252762968	0	1.408767439	1.098612289	1.609437912	1.098612289	2.674148649	2.658348622	1.974081026	1.098612289	1.533929576	1.386294361	7.195434851	7.243155513	7.129561937	0	0	1.098612289
286520_bclustnum_12_kamer_1_number_1	6.739336627	6.759951084	6.555830464	0	0	0	0	0	1.098612289	0	0	0	2.288196066	1.504077397	1.904238091	1.558144618	0	0	0	0	0	1.098612289	1.609437912	1.665006953	0	0	0	0	1.526056303	1.421386371
286686_bclustnum_1_kamer_1_number_1	0	0	0	0	0	0	3.120896887	3.481240089	3.4042228	4.428830303	6.522092798	6.469509198	4.752149499	4.708024564	4.763600268	2.144580664	1.408767439	1.098612289	3.340413581	3.398630757	3.148783778	4.121744077	4.265025012	3.684703246	1.493926046	1.098612289	1.845826164	3.4042228	3.507465485	3.713572067
286918_bclustnum_137_kamer_1_number_1	6.688043333	6.740814824	6.670449414	0	0	0	0	0	0	0	0	0	0	0	0	0	0	0	0	0	0	0	0	0	0	0	0	0	0	0
286991_bclustnum_46_kamer_1_number_1	6.707106805	6.468533781	6.458700287	0	0	0	0	0	0	0	0	0	0	0	0	0	0	0	0	0	0	0	0	0	0	0	0	0	0	0
28707_bclustnum_307_kamer_1_number_1	6.812345094	6.82676212	6.987287087	0	0	0	0	0	0	0	0	0	0	0	1.098612289	0	0	0	0	0	0	0	0	0	0	0	0	0	0	0
287536_bclustnum_27_kamer_1_number_1	6.425517112	6.558765018	6.431974997	5.610284652	5.537771179	5.611096848	0	0	0	0	0	0	0	0	0	0	0	0	0	0	0	0	1.098612289	1.098612289	0	0	0	0	0	0
28754_bclustnum_65_kamer_1_number_1	0	0	0	0	0	0	0	0	1.098612289	6.863206557	8.010313107	8.040218118	2.76361735	2.799023718	2.708050201	3.306362755	2.959363889	2.708050201	1.717651753	1.098612289	2.140066163	2.708050201	1.76766143	1.845826164	0	0	0	2.061422673	1.609437912	1.098612289
287737_bclustnum_5_kamer_1_number_1	0	0	0	0	0	0	0	0	0	6.03787092	6.855830206	6.950239891	0	0	0	3.36729583	1.824549292	1.609437912	1.098612289	0	0	0	1.098612289	0	0	0	0	0	0	0
288123_bclustnum_22_kamer_1_number_1	0	0	0	0	0	0	5.370638028	5.474893282	5.55101972	5.67102854	6.405669683	6.518409553	1.098612289	0	1.098612289	0	1.526056303	0	5.94509333	5.802873377	6.096106054	4.367759086	4.953902672	4.522513314	0	0	0	0	0	0
28872_bclustnum_46_kamer_1_number_1	6.683673788	6.478816815	6.497076604	0	1.098612289	1.098612289	0	0	0	0	0	0	1.098612289	0	0	0	0	0	0	0	0	0	1.098612289	0	0	0	0	0	0	0
289108_bclustnum_4_kamer_1_number_1	0	0	0	4.776059982	4.819547425	4.855578648	4.156274998	4.31303421	3.884995018	6.28133173	6.700525676	6.597599896	4.437934267	4.272871428	4.295923936	3.326233146	3.481240089	3.277144733	5.364418728	5.256625202	5.111987788	3.205454156	3.018202907	3.32822876	0	0	0	3.858622229	3.421000009	3.5085559
289241_bclustnum_31_kamer_1_number_1	0	0	0	0	0	0	0	0	0	0	0	0	0	0	0	0	0	0	1.435084525	0	1.098612289	0	0	0	7.312553498	7.340705844	7.318406914	0	0	0
289555_bclustnum_22_kamer_1_number_1	0	0	0	0	0	0	4.699470765	4.799453251	4.895351632	6.264667932	6.698268054	6.64797627	5.696720934	5.739792912	5.765886786	0	1.098612289	0	5.325173491	5.493974607	5.209486153	1.446918983	1.098612289	1.504077397	0	0	0	0	0	0
289610_bclustnum_45_kamer_1_number_1	7.050313309	6.968643395	7.024942582	0	0	0	0	0	0	0	0	0	0	0	0	0	0	0	0	0	0	0	0	0	0	0	0	0	0	0
28977_bclustnum_69_kamer_1_number_1	0	0	1.673975809	3.620696968	3.713572067	3.876866183	3.850147602	4.059116269	3.976080786	3.975668002	6.679889345	6.386247807	5.119489699	5.422912701	5.315479255	1.405341801	1.519826066	1.098612289	4.284117455	3.757871326	3.627413541	4.85622458	4.733686524	4.71505545	5.103736976	5.266449952	4.895800408	4.335781105	4.335781105	4.137830206
290131_bclustnum_94_kamer_2_number_2	6.571932831	6.588926478	6.543552069	0	0	0	0	0	0	0	0	0	0	0	0	0	0	0	0	0	0	0	0	0	0	0	0	0	0	0
290482_bclustnum_67_kamer_1_number_1	0	0	0	0	0	0	4.728864604	4.841561596	4.783316371	6.091687639	6.562829613	6.541510403	0	0	0	0	0	0	5.55424945	5.581614841	5.649562094	0	0	0	0	0	0	0	0	0
2905_bclustnum_586_kamer_1_number_1	0	0	0	0	0	0	5.205104985	5.127529046	5.348059458	6.939670526	7.788460283	7.527078293	0	0	0	0	1.098612289	0	0	0	1.098612289	0	0	0	0	0	0	0	0	0
290814_bclustnum_43_kamer_1_number_1	2.789488857	2.397895273	2.36427832	0	0	1.098612289	4.071355664	3.691149376	3.977128866	5.640292293	6.863613196	6.816735881	5.168931654	5.089280102	4.99659722	4.453289761	4.122726297	3.79854967	5.628602646	5.406355295	5.249415946	4.865432242	4.768368385	4.851319074	1.679642849	1.098612289	1.098612289	4.131523128	4.070734697	3.913839355
29088_bclustnum_32_kamer_1_number_1	6.607229748	6.695445332	6.568680258	6.266657707	6.362288175	6.474552514	1.098612289	0	0	0	1.098612289	0	0	1.098612289	0	0	1.098612289	0	1.098612289	0	0	0	0	0	0	0	0	1.098612289	0	0
29111_bclustnum_9209_kamer_1_number_1	0	0	0	0	0	0	4.934473933	4.97397131	4.872139217	6.405228458	6.837547384	6.685860947	1.098612289	0	0	1.609437912	0	0	4.987707789	5.16706908	4.84103251	1.098612289	0	1.098612289	0	0	0	0	0	0
291398_bclustnum_23_kamer_1_number_1	1.098612289	1.609437912	1.481604541	0	0	0	3.709813794	3.934836781	3.312785024	4.724063716	6.698620643	6.764329383	4.92557837	4.907553661	4.938888634	3.187624551	3.323927493	2.748257607	4.888030653	4.661257471	4.349781039	4.590447335	4.416985877	4.222896076	2.32238772	1.945910149	1.493926046	3.973189598	3.907396319	3.651657742
291455_bclustnum_20_kamer_1_number_1	0	0	0	0	0	0	5.744783653	5.656379847	5.952378025	5.684429746	7.721663279	7.691980971	0	0	0	0	0	0	6.135805122	6.0909863	5.895625227	0	0	0	0	0	0	0	0	0
291514_bclustnum_9_kamer_1_number_1	1.098612289	1.098612289	1.609437912	0	0	0	0	0	0	0	0	0	0	0	0	0	0	0	0	0	0	0	0	0	6.142037406	6.763191828	6.083487512	0	0	0
291563_bclustnum_12_kamer_1_number_1	0	1.897120485	1.098612289	1.098612289	0	0	0	0	0	0	0	0	0	0	0	0	0	0	0	0	0	0	0	0	6.811244379	6.701960366	6.877148638	0	0	0
291816_bclustnum_66_kamer_8_number_2	1.098612289	1.098612289	0	0	0	0	0	0	0	0	0	0	0	0	0	0	0	0	0	0	0	0	0	0	6.611464256	6.631624895	6.678701798	0	0	0
291848_bclustnum_25_kamer_1_number_1	6.779543427	6.748603615	6.768416197	4.236175377	4.326338169	4.016982841	1.098612289	0	1.098612289	1.312187543	0	0	0	0	0	0	1.098612289	0	0	0	0	1.504077397	1.773067525	2.344549155	0	0	0	0	0	0
29193_bclustnum_135_kamer_4_number_2	0	0	0	0	0	1.098612289	0	0	0	6.675462501	7.102170083	7.098210336	0	0	1.098612289	0	1.098612289	0	0	0	0	0	1.098612289	1.098612289	1.098612289	0	0	0	0	0
292428_bclustnum_26_kamer_1_number_1	0	0	0	0	0	0	0	0	0	6.151378587	7.045898521	6.993281387	0	0	0	0	0	0	0	1.504077397	0	0	0	0	0	0	0	0	0	0
292513_bclustnum_14_kamer_1_number_1	0	0	0	0	0	0	0	0	0	6.699705984	6.933101337	6.967909202	0	0	0	0	0	1.098612289	0	0	0	1.098612289	0	0	0	0	0	0	0	0
292876_bclustnum_5_kamer_1_number_1	0	0	0	0	0	0	6.687607237	6.639352821	6.635421483	0	0	0	0	0	0	0	0	0	6.556494225	6.469250317	6.302618976	0	0	0	0	0	0	0	0	0
292957_bclustnum_1_kamer_1_number_1	6.974478911	7.038906341	6.985114389	6.071398018	6.072055566	6.10956531	0	0	0	0	0	0	0	0	0	0	0	0	0	0	0	0	0	0	0	0	0	0	0	0
293193_bclustnum_25_kamer_1_number_1	6.91627885	6.81210084	6.886985064	0	0	0	0	0	0	0	0	0	0	0	0	0	0	0	0	0	0	0	0	0	0	0	0	0	0	0
293409_bclustnum_5_kamer_1_number_1	0	0	0	6.632880179	6.573835183	6.579405367	0	0	0	0	0	0	1.098612289	0	1.609437912	0	0	0	0	0	0	0	0	0	0	0	0	0	0	0
293421_bclustnum_7_kamer_1_number_1	0	0	0	1.098612289	0	1.272966076	6.969264216	7.006595584	7.098466544	0	0	0	0	0	0	0	0	0	5.279389357	5.199877294	5.129898715	0	0	0	0	0	0	0	0	0
293579_bclustnum_35_kamer_1_number_1	1.609437912	1.098612289	2.036882362	0	1.098612289	0	1.098612289	0	0	3.051819558	1.887069649	1.408767439	1.098612289	1.098612289	0	2.197224577	1.386294361	1.098612289	2.100061237	1.504077397	1.575535671	1.098612289	1.791759469	0	6.456769656	6.603422008	6.446573423	0	0	1.446918983
293778_bclustnum_61_kamer_1_number_1	6.082472303	6.136285411	6.346388709	6.447701981	6.489584798	6.543192162	3.285199003	3.044522438	2.944438979	5.098994096	4.295014803	4.458215387	4.737951297	5.258239886	5.008967237	0	0	1.558144618	1.098612289	1.098612289	0	4.94875989	4.551769409	4.664787242	1.098612289	1.098612289	1.609437912	4.143134726	4.087175593	4.208947733
2940_bclustnum_25_kamer_1_number_1	0	0	0	0	1.098612289	0	0	0	0	6.998052917	7.424761762	7.403061091	0	0	1.098612289	0	0	0	0	1.098612289	0	0	0	1.098612289	0	0	0	0	1.098612289	1.609437912
294125_bclustnum_34_kamer_1_number_1	6.632989432	6.694562059	6.638894961	0	0	0	0	0	0	0	0	0	0	0	0	0	0	0	0	0	0	0	0	0	0	0	0	0	0	0
294162_bclustnum_20_kamer_1_number_1	6.873681299	6.828441472	6.859877199	0	0	0	0	1.098612289	0	0	0	0	0	0	0	0	0	0	0	0	0	0	0	0	0	0	0	0	0	0
294229_bclustnum_46_kamer_1_number_1	0	0	0	6.65586883	6.60912415	6.634413886	0	0	0	0	0	0	1.098612289	0	1.098612289	0	0	1.098612289	0	0	0	0	0	0	0	0	0	0	0	0
2943_bclustnum_1553_kamer_1_number_1	6.666956792	6.666956792	6.708694398	0	0	0	0	0	0	0	0	0	0	0	0	0	0	0	0	0	0	0	0	0	0	0	0	0	0	0
294453_bclustnum_94_kamer_1_number_1	6.486668282	6.533788838	6.488444764	0	0	0	0	0	0	0	0	0	0	0	0	0	0	0	0	0	0	0	0	0	0	0	0	0	0	0
294508_bclustnum_4_kamer_1_number_1	0	0	0	0	0	0	0	0	0	0	0	0	0	0	0	0	0	0	0	0	0	8.039866816	7.994541245	7.727680474	0	0	0	0	0	0
294718_bclustnum_23_kamer_1_number_1	0	0	0	5.854593298	6.789647191	6.835399617	0	0	0	0	0	0	0	0	0	0	0	0	0	0	0	0	0	0	0	0	0	0	0	0
295014_bclustnum_36_kamer_6_number_2	5.672178282	5.535643863	5.468060141	6.707037138	6.676543013	6.608386516	0	0	0	0	0	0	0	0	0	0	0	0	0	0	0	0	0	0	0	0	0	0	0	0
296077_bclustnum_141_kamer_1_number_1	0	0	0	0	0	0	0	1.098612289	1.098612289	6.549430403	6.853299093	6.88763114	1.098612289	1.098612289	1.550598322	1.098612289	0	0	3.481240089	2.944438979	2.515678308	0	0	1.098612289	0	0	0	2.974069317	2.240709689	2.871681512
296272_bclustnum_19_kamer_1_number_1	1.435084525	1.098612289	1.098612289	1.098612289	0	0	0	0	0	1.098612289	0	0	0	0	1.098612289	0	0	0	0	0	0	0	0	0	7.017506143	6.974478911	7.049081215	0	0	0
296497_bclustnum_5_kamer_1_number_1	0	0	0	6.580639137	6.49677499	6.504454327	0	0	0	0	0	0	0	0	0	0	0	0	0	0	0	0	0	0	0	0	0	0	0	0
296759_bclustnum_22_kamer_1_number_1	3.561676566	3.68609809	3.887275291	6.523888244	6.593196577	6.579405367	0	0	0	0	0	0	0	1.098612289	0	0	0	0	0	1.098612289	1.098612289	0	0	0	3.652101355	3.604894402	3.735020875	0	0	0
2967_bclustnum_936_kamer_1_number_1	0	0	0	0	0	1.098612289	1.446918983	0	1.488076733	6.537850346	5.820741467	5.628340279	1.609437912	1.734601644	2.221615789	0	0	0	1.098612289	0	0	1.098612289	1.098612289	1.299283893	1.349925976	0	1.098612289	1.098612289	0	1.098612289
29837_bclustnum_111_kamer_1_number_1	0	0	0	6.707066472	6.653723304	6.718207274	0	0	0	0	0	0	0	0	0	0	0	0	0	0	0	0	0	0	0	0	0	0	0	0
299018_bclustnum_12_kamer_1_number_1	6.506115844	6.508107219	6.593500595	3.205454156	2.772588722	3.005682604	0	0	0	0	0	0	0	0	0	0	0	0	0	0	0	0	0	0	0	0	0	0	0	0
299110_bclustnum_32_kamer_1_number_1	4.825108606	4.567814053	4.705920089	6.509017988	6.547741912	6.529175013	0	0	0	0	0	0	0	0	0	0	0	0	0	0	0	0	0	0	0	0	0	0	0	1.098612289
2993_bclustnum_8095_kamer_1_number_1	0	0	0	0	0	0	4.260917762	4.556505014	4.458215387	5.40617576	6.248901307	6.50578406	0	1.098612289	0	0	1.098612289	0	3.77767528	4.070246523	3.168752372	0	0	0	0	0	0	1.098612289	0	0
300097_bclustnum_15_kamer_1_number_1	6.548505595	6.550222825	6.522680861	0	0	0	0	0	0	0	0	0	0	0	0	0	0	0	0	0	0	0	0	0	0	0	0	0	0	0
300393_bclustnum_45_kamer_1_number_1	6.517999136	6.639585596	5.995954452	0	0	0	2.061422673	1.609437912	0	0	0	0	0	0	0	0	0	0	2.781480325	1.945910149	2.397895273	0	0	0	0	0	0	0	0	0
300605_bclustnum_12_kamer_1_number_1	6.772916747	6.816735881	6.719531136	0	0	0	1.098612289	0	0	0	0	0	0	0	0	0	0	0	0	0	0	0	0	0	0	0	0	0	0	0
300783_bclustnum_16_kamer_1_number_1	0	0	0	0	0	0	0	0	0	5.74794289	6.586171655	6.63824051	0	0	0	0	0	1.098612289	1.098612289	0	0	0	0	0	0	0	0	0	0	0
3007_bclustnum_930_kamer_6_number_2	0	0	0	0	0	0	1.386294361	0	0	7.014302091	7.578585273	7.624272246	0	1.098612289	0	1.098612289	0	1.098612289	1.098612289	1.098612289	1.098612289	1.526056303	1.098612289	1.098612289	0	0	0	0	0	0
301208_bclustnum_23_kamer_1_number_1	0	0	0	0	0	0	1.526056303	0	0	5.984495318	6.735542456	6.723111027	5.68833037	5.826000107	5.775172471	0	0	0	0	0	0	0	0	0	0	0	0	0	0	0
301394_bclustnum_42_kamer_1_number_1	6.557424454	6.511204322	6.56590561	0	0	0	0	0	0	0	0	0	0	0	0	0	0	0	0	0	0	0	0	0	0	0	0	0	0	0
301450_bclustnum_16_kamer_38_number_2	0	0	0	6.501789546	6.482598047	6.477997991	0	0	0	0	0	0	0	0	0	0	0	0	0	0	0	0	0	0	0	0	0	0	0	0
301517_bclustnum_28_kamer_1_number_1	6.577861358	6.467958009	6.473376675	0	0	0	1.540445755	1.098612289	1.098612289	0	0	0	1.098612289	1.098612289	1.098612289	3.218875825	3.270834298	3.633189667	0	1.098612289	1.299283893	3.279240648	3.57421748	3.227724559	0	0	0	0	0	0
301672_bclustnum_107_kamer_1_number_1	6.505286178	6.506033655	6.531121038	0	0	0	0	0	0	0	0	0	0	0	0	0	0	0	1.098612289	0	0	0	0	0	0	0	0	0	0	0
301776_bclustnum_86_kamer_1_number_1	0	0	0	0	0	0	0	0	0	6.119417911	6.382191581	6.883667483	0	0	0	0	0	0	0	0	0	0	0	0	0	0	0	0	0	0
30178_bclustnum_442_kamer_1_number_1	1.098612289	1.098612289	1.098612289	0	0	0	0	0	0	0	0	0	0	0	0	0	0	0	0	0	0	0	0	0	6.64653466	6.45011965	6.607100085	2.745435898	3.058035486	3.218875825
3018_bclustnum_840_kamer_1_number_1	0	0	1.098612289	0	1.098612289	0	1.704748092	1.526056303	2.1102132	6.481577129	6.656726524	6.737263474	1.098612289	1.446918983	0	0	0	0	0	0	0	0	0	0	0	0	0	1.526056303	1.098612289	1.609437912
3019_bclustnum_249_kamer_78_number_2	0	0	0	6.744647941	6.619072706	6.590301048	0	0	0	0	0	0	0	0	0	0	0	0	0	0	0	0	0	0	0	0	0	0	0	0
302110_bclustnum_35_kamer_1_number_1	0	0	0	0	0	0	0	0	1.098612289	0	0	0	5.872742946	6.559331911	6.442221644	0	0	0	0	0	0	0	0	0	0	0	0	0	1.098612289	1.504077397
302419_bclustnum_27_kamer_1_number_1	0	0	0	0	0	0	6.54596585	6.625202695	6.587746965	0	0	1.098612289	0	0	0	0	0	0	0	0	0	0	0	0	0	0	0	0	0	0
30244_bclustnum_262_kamer_1_number_1	0	1.526056303	1.098612289	0	0	0	0	0	0	0	0	0	0	0	0	0	0	0	0	0	0	0	0	0	6.642486801	6.672286078	6.630419499	0	0	0
303865_bclustnum_5_kamer_1_number_1	6.989740714	7.032624261	6.995866884	1.098612289	1.098612289	0	0	0	0	0	0	0	0	0	0	0	0	0	0	0	0	0	0	0	0	0	0	0	0	0
304298_bclustnum_39_kamer_1_number_1	0	0	0	6.474404453	6.425228765	6.510753754	0	0	0	0	0	0	0	0	0	0	0	0	0	0	0	0	0	0	0	0	0	0	0	0
304418_bclustnum_30_kamer_1_number_1	0	0	0	0	0	1.098612289	6.649102419	6.57634282	6.578871973	0	0	0	0	0	0	0	0	0	0	0	0	0	0	0	1.526056303	0	0	0	0	0
30601_bclustnum_124_kamer_1_number_1	0	0	0	1.098612289	0	1.098612289	1.609437912	2.268683886	2.172223528	6.448362357	7.026524495	7.044521434	0	0	1.446918983	0	1.098612289	0	3.68609809	3.523087527	4.023365792	1.098612289	1.098612289	0	0	0	1.098612289	0	0	0
306478_bclustnum_42_kamer_1_number_1	0	0	0	6.467388119	6.524149505	6.518852259	1.098612289	0	0	0	0	0	0	0	0	0	0	0	0	0	0	0	0	0	0	0	0	0	0	0
307480_bclustnum_2_kamer_1_number_1	3.211577255	3.15463166	3.055047804	0	0	0	0	0	0	1.098612289	0	0	0	0	0	0	0	0	0	0	1.098612289	0	0	1.098612289	6.663828495	6.511474862	6.538928225	0	0	0
3074_bclustnum_839_kamer_1_number_1	0	0	0	0	0	0	1.098612289	0	0	6.483362671	6.522582384	6.517917919	0	0	0	1.098612289	0	1.526056303	0	0	0	0	1.098612289	0	0	0	0	0	0	1.098612289
308301_bclustnum_45_kamer_1_number_1	1.098612289	1.098612289	0	0	0	0	1.386294361	1.098612289	0	4.152163684	6.540823629	6.487901651	1.550598322	1.408767439	1.4663363	0	1.098612289	0	1.791759469	1.098612289	1.533929576	1.098612289	0	1.516348465	1.098612289	0	1.098612289	1.488076733	0	0
308316_bclustnum_14_kamer_1_number_1	1.504077397	0	1.098612289	0	0	0	0	0	0	0	0	1.609437912	1.098612289	0	0	0	0	0	0	0	0	0	0	0	6.567515956	6.607460668	6.639875834	0	0	0
308777_bclustnum_5_kamer_1_number_1	6.613205679	6.652346767	6.604034606	3.882357297	3.721048923	3.987558958	0	0	1.421386371	0	0	0	0	0	0	0	0	1.098612289	1.098612289	1.098612289	0	0	1.098612289	0	4.23633301	4.04574588	4.348124652	0	0	0
308_bclustnum_355_kamer_2_number_2	0	0	0	0	0	0	1.098612289	0	0	6.280708524	6.968069264	6.984873715	1.098612289	0	1.098612289	1.967650673	1.241713577	1.725509262	0	0	0	1.967650673	1.575535671	1.488076733	0	0	1.098612289	0	0	0
309311_bclustnum_15_kamer_18_number_2	6.792344427	6.826079822	6.796504114	4.257030144	4.452019006	4.364371699	0	0	0	0	0	0	0	0	0	0	0	0	0	0	0	0	0	0	0	0	0	0	0	0
309429_bclustnum_36_kamer_1_number_1	1.098612289	1.749199855	2.268683886	6.559007404	6.637258031	6.557792047	0	0	0	0	0	0	0	0	0	0	0	0	0	0	0	0	0	0	0	1.098612289	0	0	0	0
309577_bclustnum_56_kamer_1_number_1	6.905642048	6.538621618	6.760182915	0	0	0	0	0	0	0	0	0	0	0	0	0	0	0	0	0	0	0	0	0	0	1.098612289	0	0	0	0
3108_bclustnum_2112_kamer_1_number_1	0	0	0	0	0	0	0	0	0	6.106033534	6.941837814	6.985947044	0	0	0	0	0	0	0	0	0	0	0	0	0	0	1.098612289	0	0	0
31097_bclustnum_2_kamer_1_number_1	1.945910149	1.609437912	1.99242971	2.036882362	1.098612289	1.704748092	2.397895273	1.945910149	1.4663363	0	0	0	0	0	0	0	0	0	0	0	0	0	0	0	0	0	0	6.619629108	6.632586587	6.828591935
31103_bclustnum_607_kamer_1_number_1	6.485550847	6.454254722	6.540741357	1.098612289	1.098612289	0	0	0	0	0	0	0	0	0	0	0	0	0	0	0	0	0	0	0	0	0	0	0	0	0
311055_bclustnum_5_kamer_1_number_1	6.896828802	6.900327763	6.813518223	0	1.098612289	0	0	0	0	0	0	0	1.098612289	1.098612289	0	0	0	0	0	0	0	0	0	0	0	0	0	0	0	0
31119_bclustnum_13_kamer_4_number_3	5.058364578	5.141663557	5.097833876	0	0	0	4.116322925	3.976560902	4.066173114	6.017782667	6.883803717	6.885850103	5.231108617	5.36908799	5.232887782	4.844187086	4.557379173	4.38618423	5.463831805	5.574686943	5.362854325	4.773502684	4.663439094	4.532599493	5.96870756	6.069196125	6.05990093	3.995137299	4.001254749	3.680512045
31149_bclustnum_610_kamer_1_number_1	0	0	0	0	0	0	1.413693065	0	1.098612289	6.369330615	7.380505134	7.454783605	0	0	1.098612289	0	1.098612289	1.098612289	0	0	0	0	1.945910149	1.526056303	0	0	0	1.098612289	1.098612289	0
3116_bclustnum_114_kamer_1_number_1	1.098612289	0	0	0	0	0	0	0	0	6.649573755	6.86171134	6.834377809	0	0	0	2.63905733	1.558144618	1.609437912	0	0	0	0	0	1.791759469	0	0	0	0	0	0
311717_bclustnum_19_kamer_1_number_1	0	0	0	0	0	0	0	0	0	0	0	0	0	0	0	1.098612289	1.32175584	0	0	0	0	6.896227084	6.68352739	6.528520625	0	0	0	0	0	0
311811_bclustnum_14_kamer_1_number_1	0	0	0	0	0	0	4.34163814	4.567814053	4.278978721	6.837511983	7.49452476	7.431992563	0	0	0	4.016383021	4.156274998	4.267363259	5.283203729	5.048784921	5.179911012	5.313205979	5.361292166	5.388057517	0	0	0	4.565504814	4.634728988	4.377851682
31252_bclustnum_15_kamer_1_number_1	1.734601644	1.815290432	1.213023721	1.098612289	1.098612289	1.098612289	3.725693427	4.094344562	3.73289634	5.801613716	6.530669151	6.540205706	5.005863929	5.128204974	5.165602783	3.862832761	3.408576754	3.364156424	5.090240983	4.786299366	4.540250792	4.596562244	4.746174834	4.640778613	5.834392521	5.752572639	5.757547545	3.815512105	3.981015344	3.825530039
31258_bclustnum_108_kamer_1_number_1	0	0	0	0	0	0	0	0	0	6.691587341	6.814103723	6.853932472	0	0	0	0	0	0	0	0	0	0	0	0	0	0	0	1.098612289	0	0
312637_bclustnum_104_kamer_1_number_1	0	0	0	0	0	0	0	0	0	0	0	0	0	0	0	0	0	0	0	0	0	0	0	0	6.419550204	6.503062872	6.470376814	0	0	0
313080_bclustnum_1_kamer_1_number_1	6.811519671	6.788126792	6.782192056	2.054123734	2.197224577	3.044522438	0	1.609437912	0	0	0	0	0	0	0	0	0	0	0	0	0	0	0	0	0	0	0	0	0	0
313277_bclustnum_21_kamer_1_number_1	0	0	1.098612289	0	0	0	1.871802177	0	1.609437912	1.098612289	1.098612289	0	3.397487174	3.382503739	3.881563798	3.401197382	3.135494216	2.890371758	0	1.098612289	1.609437912	3.597312261	3.511545439	3.988984047	6.440490296	6.55298281	6.624950626	1.871802177	1.386294361	1.609437912
313678_bclustnum_31_kamer_17_number_2	0	1.686398954	1.609437912	0	0	0	4.943590524	4.986718214	4.919980926	5.994868746	6.211876371	6.294091881	4.249792971	4.64701246	4.436212928	2.09714147	2.068012731	1.806797496	6.504969079	6.326800424	6.391612209	4.165959549	4.12566718	4.376329185	0	0	0	0	0	0
314061_bclustnum_4_kamer_1_number_1	0	0	0	0	0	0	0	0	0	6.804983632	6.844104897	6.945590417	0	0	0	0	0	0	0	1.516348465	1.098612289	0	0	0	0	0	0	0	0	0
314538_bclustnum_39_kamer_1_number_1	0	0	0	0	0	0	1.335001067	1.757857918	1.85629799	6.048947769	6.687939933	6.613384218	0	0	0	3.761200116	3.479040749	3.850147602	2.360854001	2.335374593	2.470917591	3.206491454	3.250374492	3.401197382	0	0	0	0	0	1.609437912
3150_bclustnum_225_kamer_1_number_1	1.098612289	0	0	0	0	1.098612289	4.929663822	4.944972586	4.615120517	5.67102854	6.338240659	6.695125019	4.066173114	4.013374897	3.795489189	1.904238091	1.098612289	1.609437912	5.720311777	5.506684279	5.624980941	1.810108426	1.558144618	1.810108426	0	0	0	0	1.609437912	1.609437912
315266_bclustnum_55_kamer_1_number_1	0	0	0	0	0	0	1.098612289	0	0	6.502124157	6.352822757	6.298336927	0	0	0	1.098612289	0	0	2.007467445	1.540445755	0	1.098612289	0	1.098612289	0	0	0	0	0	0
315624_bclustnum_70_kamer_1_number_1	0	0	0	1.098612289	0	0	1.098612289	0	1.386294361	6.623799588	6.667663921	6.817830571	0	0	1.098612289	1.609437912	0	0	0	1.098612289	1.098612289	1.098612289	0	1.236761337	0	0	0	4.460144414	4.553876892	4.375757022
315938_bclustnum_5_kamer_1_number_1	0	0	0	0	0	1.098612289	7.337587744	7.332480384	7.348375153	0	0	0	0	0	0	0	0	0	1.749199855	1.722766598	1.4663363	0	0	0	0	0	1.098612289	0	0	0
315950_bclustnum_12_kamer_3_number_2	6.630023537	6.595438926	6.641508487	0	0	0	0	0	0	0	0	0	0	0	0	0	0	0	0	0	0	0	0	0	0	0	0	0	0	0
317584_bclustnum_28_kamer_1_number_1	0	0	0	2.89652501	3.115983372	2.97892685	1.098612289	0	0	5.561961581	6.483616396	6.632586587	0	1.098612289	0	0	1.098612289	0	0	0	0	0	0	0	0	0	0	0	0	0
3177_bclustnum_308_kamer_5_number_2	0	0	0	0	0	0	5.526591733	5.395575648	5.408453461	6.93523425	6.552099815	6.523562306	0	0	0	1.609437912	1.488076733	1.098612289	5.43122544	5.491883795	5.483609507	1.098612289	2.061422673	1.609437912	0	1.098612289	0	0	0	0
3177_bclustnum_3536_kamer_1_number_1	1.098612289	0	1.098612289	0	0	0	2.367123927	1.824549292	1.734601644	5.468764534	6.592359368	6.555830464	0	0	0	0	1.098612289	1.098612289	1.824549292	1.098612289	1.568615918	1.098612289	0	1.098612289	0	0	0	0	0	0
318477_bclustnum_22_kamer_1_number_1	5.770873984	5.747365454	5.871604982	6.717804695	6.698939838	6.714722562	0	0	0	0	0	0	0	0	0	0	0	0	0	0	0	0	0	0	0	0	0	0	0	0
318695_bclustnum_9_kamer_1_number_1	0	0	0	0	0	0	4.201975499	3.908683435	3.942464913	6.111837559	6.513904957	6.471222015	1.446918983	1.098612289	1.098612289	0	0	0	0	1.098612289	1.098612289	0	1.098612289	0	0	0	0	1.098612289	1.098612289	1.098612289
3189_bclustnum_926_kamer_1_number_1	5.189963486	4.979914884	4.926695558	2.104134154	1.098612289	1.098612289	4.308559034	4.069684657	4.565148912	4.724853637	6.521461717	6.64589039	5.411302243	5.444886522	5.471947092	2.717531775	1.098612289	1.098612289	4.169982197	3.656209041	3.614772636	4.712103464	4.662089127	4.753590191	0	0	0	4.440840206	4.51867831	4.352426594
319145_bclustnum_36_kamer_1_number_1	6.637734982	6.62551305	6.64485427	0	0	0	0	0	0	0	0	0	0	0	0	0	0	0	0	0	0	0	0	0	0	0	0	0	0	0
319269_bclustnum_42_kamer_33_number_3	1.526056303	1.098612289	1.098612289	0	0	0	1.098612289	0	1.609437912	2.360854001	0	0	0	0	0	0	0	0	1.945910149	2.397895273	1.945910149	0	0	0	7.200872554	7.227081357	7.126569472	1.098612289	0	0
319806_bclustnum_35_kamer_6_number_2	0	0	0	0	0	0	0	0	0	7.047638953	7.579459187	7.612193475	0	0	0	0	0	0	1.098612289	0	0	0	0	0	0	0	0	5.574322781	5.553513695	5.642414035
31988_bclustnum_156_kamer_1_number_1	0	0	0	0	0	0	0	0	0	0	0	0	0	0	0	0	0	0	0	0	0	0	0	0	6.546785411	6.459334652	6.424278898	0	0	0
320015_bclustnum_22_kamer_1_number_1	6.389172983	6.480657871	6.515897174	5.936575321	5.843544417	5.889799971	0	0	0	0	0	0	0	0	0	0	0	0	0	0	0	0	0	0	0	0	0	0	0	0
320137_bclustnum_45_kamer_1_number_1	0	1.098612289	0	6.505120163	6.482937612	6.523888244	0	0	0	0	1.098612289	1.098612289	0	0	0	0	0	0	0	0	0	0	0	0	0	0	0	0	0	0
32020_bclustnum_341_kamer_1_number_1	0	0	1.098612289	6.54448722	6.561596277	6.581748092	0	0	0	0	0	0	0	0	0	0	0	0	0	0	0	0	0	0	0	0	0	1.673975809	2.944438979	2.367123927
320602_bclustnum_25_kamer_1_number_1	7.325221419	7.301525602	7.143143557	0	0	0	0	0	0	0	0	0	0	0	0	0	0	0	0	0	0	0	0	0	0	1.098612289	1.098612289	0	0	0
320664_bclustnum_36_kamer_1_number_1	6.485653038	6.460251812	6.516028861	2.908719078	2.662585501	2.97892685	1.098612289	1.887069649	1.098612289	0	0	0	0	0	1.098612289	0	0	0	0	0	0	0	0	0	0	1.098612289	0	1.945910149	0	1.098612289
320831_bclustnum_10_kamer_51_number_2	2.496744637	1.098612289	1.098612289	0	0	0	0	0	0	0	0	0	0	0	0	0	0	0	0	0	0	0	0	0	6.965354151	6.955592608	6.966156254	0	0	0
32189_bclustnum_238_kamer_1_number_1	0	0	0	0	0	0	1.945910149	2.197224577	1.540445755	6.455984418	7.173705414	7.196933731	1.098612289	1.098612289	1.098612289	0	0	0	0	1.386294361	1.386294361	0	0	0	0	0	0	1.098612289	1.845826164	1.098612289
3222_bclustnum_7154_kamer_1_number_1	6.59441346	6.404755619	6.34888896	0	0	0	0	0	0	1.098612289	0	0	1.098612289	0	0	0	0	1.098612289	0	0	0	0	0	1.098612289	0	0	0	1.658228077	1.098612289	1.098612289
322776_bclustnum_20_kamer_8_number_2	6.51656283	6.415914955	6.413868709	4.957586073	4.919980926	5.038574663	0	0	0	1.098612289	0	0	0	0	0	1.098612289	0	0	1.098612289	1.098612289	0	0	0	0	0	0	0	0	0	0
32332_bclustnum_354_kamer_1_number_1	2.45673863	1.791759469	2.335374593	2.602689685	2.708050201	1.945910149	0	1.098612289	0	0	0	0	0	0	0	0	0	0	0	0	0	0	0	0	6.472346295	6.45927828	6.547359134	0	1.098612289	1.609437912
323766_bclustnum_38_kamer_1_number_1	1.098612289	0	1.098612289	4.670152359	4.693968299	4.688720581	0	0	0	6.011879732	6.812659676	6.890900024	0	0	0	0	0	0	0	0	1.098612289	0	1.098612289	0	0	0	0	1.845826164	1.540445755	1.609437912
323875_bclustnum_139_kamer_1_number_1	1.098612289	0	1.609437912	0	0	0	3.247047257	3.439834591	3.496507561	4.823944205	6.378426184	6.521157066	4.357873533	4.7528054	4.342072753	2.619386551	3.315839183	2.564949357	3.928254558	3.226121511	3.275426276	4.228823006	4.004022256	4.262679877	0	0	0	4.049409956	4.092828413	3.688879454
324595_bclustnum_1_kamer_1_number_1	1.098612289	1.098612289	1.791759469	0	0	0	0	0	1.098612289	1.098612289	0	0	0	0	0	1.446918983	0	0	0	1.686398954	1.945910149	1.098612289	1.098612289	1.098612289	6.589675853	6.564112193	6.683816411	0	0	0
32483_bclustnum_472_kamer_1_number_1	6.576190979	6.70073111	6.400257445	6.291198701	6.469250317	6.355065451	0	1.526056303	1.609437912	1.098612289	0	0	0	0	1.098612289	1.098612289	1.098612289	1.609437912	1.098612289	1.526056303	0	1.85629799	1.757857918	1.098612289	5.837730447	5.877735782	5.963579344	0	0	1.098612289
325408_bclustnum_0_kamer_1_number_1	2.024381953	1.694594904	1.749199855	0	0	0	0	0	0	0	0	0	0	0	0	0	0	0	0	0	0	0	0	0	8.264991513	8.40038518	8.222881189	0	0	0
325453_bclustnum_246_kamer_28_number_2	7.041761559	7.038958965	6.966967139	0	0	0	0	0	0	0	0	0	0	0	0	0	0	0	0	0	0	0	0	0	0	0	0	0	0	0
3257_bclustnum_993_kamer_4_number_2	6.944328259	6.902742737	6.848005275	0	0	0	0	0	0	0	0	0	0	0	0	0	0	0	0	0	0	0	0	0	0	1.098612289	1.098612289	0	0	0
32600_bclustnum_362_kamer_1_number_1	6.613086187	6.596235329	6.415424238	0	1.435084525	1.098612289	0	0	0	0	0	0	0	0	0	0	0	0	0	0	0	0	0	0	0	0	0	0	0	0
326777_bclustnum_22_kamer_3_number_2	0	0	0	6.575871897	6.570281941	6.577463504	0	0	0	0	0	0	0	0	0	0	0	0	0	0	0	0	0	0	0	0	0	0	0	0
32679_bclustnum_34_kamer_1_number_1	1.504077397	1.945910149	2.708050201	1.945910149	2.140066163	1.098612289	0	0	0	0	0	0	1.098612289	0	0	0	0	0	0	0	0	0	0	0	6.933159833	6.959920693	6.944260771	0	0	0
32686_bclustnum_188_kamer_1_number_1	0	1.609437912	0	0	0	0	0	1.098612289	0	6.149179581	7.045175351	6.971452822	0	1.098612289	1.36330461	0	1.098612289	0	0	1.098612289	1.098612289	0	0	1.098612289	0	0	0	0	0	0
32752_bclustnum_25_kamer_1_number_1	7.017604704	6.964031637	7.005789019	5.47750903	5.395897695	5.449964916	0	0	0	0	0	0	0	0	0	0	0	0	0	0	0	0	0	0	0	0	0	0	0	0
32805_bclustnum_581_kamer_1_number_1	0	1.098612289	0	0	0	0	0	0	0	6.14761323	6.563150059	6.426892906	0	0	0	0	0	0	0	1.098612289	0	0	0	0	0	1.098612289	0	0	1.098612289	0
32817_bclustnum_22_kamer_1_number_1	0	0	0	0	0	0	0	0	0	6.893656355	7.200924768	7.171656823	0	0	0	0	0	0	0	0	0	0	0	0	0	0	0	1.098612289	0	0
328277_bclustnum_45_kamer_1_number_1	6.814817283	6.765327286	6.753437919	0	0	0	1.098612289	0	0	0	0	0	0	0	0	0	0	0	0	0	0	1.098612289	1.386294361	0	0	0	0	0	0	0
328467_bclustnum_4_kamer_1_number_1	1.098612289	0	0	0	0	1.098612289	5.325932534	5.325932534	5.295312858	6.68660973	6.698761151	6.65929392	0	0	0	0	0	0	5.916741001	6.224162311	6.009795504	0	0	0	0	0	0	0	0	0
328499_bclustnum_14_kamer_1_number_1	0	0	0	0	0	0	0	0	0	6.657643841	7.038906341	6.818377468	0	0	0	0	0	0	1.098612289	0	0	0	0	1.098612289	0	0	0	0	0	0
32855_bclustnum_163_kamer_1_number_1	0	0	0	0	0	0	0	0	0	0	0	0	0	0	0	0	0	0	0	0	0	0	0	0	6.505553839	6.461829049	6.533676913	0	0	0
3285_bclustnum_2369_kamer_1_number_1	7.20429798	7.205783643	7.147873935	0	0	0	0	0	0	0	0	0	0	0	0	0	0	0	0	0	0	0	0	0	0	0	0	0	0	0
329905_bclustnum_11_kamer_80_number_3	0	0	0	0	0	0	1.540445755	0	0	6.504288174	6.29710932	6.433475319	3.232119736	2.564949357	2.944438979	0	0	0	0	0	1.504077397	0	0	0	0	0	0	3.191845783	2.197224577	2.944438979
330362_bclustnum_21_kamer_1_number_1	0	0	0	0	0	1.098612289	6.587550015	6.457292282	6.4491536	0	0	0	0	0	0	0	0	0	3.881563798	3.610917913	3.765069365	0	0	0	0	0	0	0	0	0
330571_bclustnum_3_kamer_1_number_1	1.098612289	0	0	0	0	0	1.945910149	1.945910149	1.223775432	6.725033642	6.811464619	6.847155657	0	0	0	0	0	1.098612289	0	0	1.098612289	0	1.098612289	1.098612289	0	0	0	0	0	0
331015_bclustnum_25_kamer_6_number_2	0	0	0	0	0	0	2.079441542	1.609437912	2.397895273	6.447305863	7.363279587	7.284134806	2.397895273	2.302585093	2.054123734	0	0	0	3.33220451	3.425889994	3.473518043	1.098612289	0	0	0	0	0	0	0	0
331139_bclustnum_52_kamer_1_number_1	4.244917421	4.307437778	4.540631665	6.713259921	6.666320458	6.72982407	0	0	0	0	0	0	0	0	0	0	0	0	0	0	0	0	0	0	0	0	0	0	0	0
331343_bclustnum_43_kamer_1_number_1	0	0	1.098612289	0	0	0	1.098612289	0	0	5.816515745	6.891964254	6.882847643	0	0	0	0	0	0	0	0	0	0	0	0	0	0	0	0	0	0
331795_bclustnum_52_kamer_1_number_1	1.098612289	1.098612289	0	0	0	0	0	0	0	0	0	0	0	0	0	1.098612289	1.098612289	0	0	0	0	0	1.098612289	1.098612289	6.858114303	6.792344427	6.869460297	0	0	0
332282_bclustnum_12_kamer_1_number_1	0	0	0	0	0	0	4.48863637	4.720282993	4.691347882	5.128027142	7.52463138	7.363412742	1.098612289	0	1.098612289	1.609437912	1.650681578	1.402824483	5.162377361	5.105308908	4.718025545	5.106878372	5.075654949	4.779123493	1.098612289	0	0	4.025351691	4.189654742	3.753418757
333225_bclustnum_24_kamer_1_number_1	1.609437912	0	0	0	0	1.098612289	0	0	0	0	0	1.098612289	0	0	0	5.633256285	5.717968049	5.489528461	0	1.098612289	0	6.650464025	6.640808732	6.591673732	0	0	0	4.687404337	4.723584134	4.683454425
333230_bclustnum_45_kamer_1_number_1	6.807658662	6.699363631	6.781341354	6.43775165	6.330116549	6.470412432	0	0	0	0	0	0	0	0	0	0	0	0	0	0	0	0	0	0	0	0	0	0	0	0
333264_bclustnum_27_kamer_1_number_1	0	0	0	0	0	0	3.985892235	3.982792697	3.791736088	4.777719146	6.539585956	6.465106861	0	1.098612289	0	0	0	0	2.823359067	2.730026934	3.225008979	0	1.098612289	1.098612289	1.098612289	0	0	0	0	0
3340_bclustnum_18_kamer_1_number_1	0	0	0	0	0	0	1.098612289	0	0	6.149002341	7.043814723	6.962716837	0	0	0	0	0	0	3.959452244	3.433987204	3.316779004	0	0	0	0	0	0	0	0	0
33425_bclustnum_284_kamer_1_number_1	0	0	0	6.756803311	6.673578586	6.730885633	0	0	0	0	0	0	0	0	0	1.945910149	1.386294361	1.098612289	0	0	0	2.061422673	1.4663363	2.520000268	0	0	0	0	0	0
33498_bclustnum_606_kamer_1_number_1	7.039274649	6.955173073	6.959189563	3.797733859	4.34668698	3.855806031	0	1.945910149	1.098612289	0	1.098612289	1.098612289	0	0	1.098612289	0	0	0	1.098612289	0	0	0	0	0	2.496744637	1.945910149	1.098612289	1.272966076	1.945910149	0
335771_bclustnum_14_kamer_1_number_1	0	0	0	0	0	0	6.487988386	6.489508837	6.506381789	0	1.609437912	1.4663363	0	0	0	0	0	0	4.613138356	5.043425117	4.928701911	0	0	1.098612289	1.098612289	0	0	0	1.098612289	0
336281_bclustnum_20_kamer_1_number_1	2.302585093	1.098612289	2.351375257	1.098612289	1.098612289	1.609437912	0	0	1.098612289	0	1.098612289	1.098612289	6.509762682	6.447833457	6.514712691	1.098612289	0	0	0	0	0	1.098612289	1.098612289	0	0	0	0	2.63905733	1.504077397	2.302585093
336281_bclustnum_7_kamer_1_number_1	1.098612289	1.504077397	2.014903021	1.945910149	1.098612289	2.197224577	1.609437912	0	0	0	0	1.504077397	6.565466358	6.675102912	6.659477236	1.945910149	0	1.871802177	1.098612289	0	0	2.442347035	1.887069649	2.197224577	0	0	0	3.931825633	3.663561646	3.446807893
336353_bclustnum_20_kamer_1_number_1	7.127091592	7.118218777	7.027092662	4.182050143	4.468777561	4.471638793	0	0	0	0	0	0	0	0	0	0	0	0	0	1.098612289	0	0	0	0	0	1.098612289	1.098612289	0	0	0
336380_bclustnum_5_kamer_1_number_1	6.876582415	6.81014245	6.820268516	2.274933281	1.098612289	1.098612289	0	0	0	0	0	0	0	0	0	0	0	0	0	0	0	0	0	0	0	0	0	0	0	0
336916_bclustnum_15_kamer_1_number_1	0	0	0	6.548088722	6.404626624	6.492101947	0	0	0	1.098612289	0	1.098612289	0	0	0	0	0	0	0	1.609437912	0	0	0	0	0	0	0	0	0	0
337098_bclustnum_15_kamer_1_number_1	0	0	0	0	0	0	4.240772642	4.367499119	4.51254819	5.079489489	6.930494766	6.920523418	5.331974555	5.430358274	5.420194233	0	0	0	5.249048338	5.016259449	5.200197243	0	1.241713577	1.098612289	0	0	0	1.098612289	0	0
337227_bclustnum_65_kamer_1_number_1	0	1.098612289	1.098612289	0	0	0	0	0	0	6.045794102	6.662280481	6.557387546	0	0	0	0	0	0	0	0	0	0	1.098612289	0	0	0	0	0	0	0
337851_bclustnum_26_kamer_1_number_1	0	1.098612289	0	2.730026934	3.17805383	3.232119736	0	0	0	0	0	0	0	0	0	0	0	0	0	0	0	0	0	0	6.591673732	6.672575836	6.599093327	0	0	0
337892_bclustnum_13_kamer_1_number_1	6.14694149	6.800170068	6.443495124	5.606136569	5.608137572	5.63511455	0	0	0	1.098612289	1.098612289	0	0	0	0	0	0	1.098612289	0	0	0	1.504077397	1.098612289	0	0	0	0	0	0	0
338164_bclustnum_20_kamer_1_number_1	4.83786795	4.709530201	4.603740164	1.098612289	0	0	3.033885109	3.397487174	3.209948091	5.397257314	6.905196007	6.89804125	1.99242971	1.609437912	1.609437912	0	0	1.098612289	0	1.488076733	0	0	1.098612289	0	0	0	0	1.098612289	0	0
338784_bclustnum_20_kamer_32_number_3	6.657643841	6.549241503	6.471904157	0	0	0	0	0	0	0	0	0	0	0	0	0	0	0	0	0	0	0	0	0	0	0	0	0	0	0
339739_bclustnum_27_kamer_1_number_1	0	0	0	0	0	0	3.320229524	3.69717743	4.007333185	6.732739768	7.210242217	7.16403182	0	1.609437912	1.098612289	0	0	0	3.95763288	4.709530201	4.272026205	0	0	0	0	0	0	0	0	0
339772_bclustnum_23_kamer_1_number_1	0	0	0	0	0	0	2.63905733	2.595254707	1.722766598	6.229693736	7.036851852	6.935953933	1.098612289	1.526056303	1.413693065	0	0	0	1.824549292	1.526056303	1.791759469	1.504077397	1.098612289	1.386294361	0	0	0	0	0	0
3400_bclustnum_1970_kamer_1_number_1	0	0	0	6.635946556	6.550008332	6.578209002	1.098612289	0	0	0	0	1.098612289	0	0	0	0	0	0	0	0	0	0	0	0	1.098612289	0	0	0	0	0
34028_bclustnum_413_kamer_1_number_1	0	0	0	0	0	0	1.609437912	1.098612289	1.609437912	4.692759729	6.993299747	7.014400968	0	0	0	0	0	1.098612289	1.098612289	1.563976003	1.493926046	0	0	0	0	0	0	0	0	0
340376_bclustnum_25_kamer_1_number_1	0	0	1.098612289	0	0	0	0	0	0	0	0	0	0	0	0	0	0	0	0	0	0	0	0	0	6.696623052	6.653435769	6.735911835	0	0	0
340380_bclustnum_27_kamer_1_number_1	0	0	0	0	0	0	5.321056854	5.405376439	5.674696894	6.089044875	6.707595564	6.714413219	2.564949357	2.397895273	2.862200881	1.981001469	2.302585093	2.621038824	6.954829686	6.78603952	6.7379155	2.656756907	2.131627125	2.327277706	0	0	0	2.856470206	2.240709689	3.100092289
340688_bclustnum_18_kamer_6_number_2	0	0	0	6.563502855	6.545144179	6.475432717	0	0	0	0	0	0	0	0	0	0	0	0	0	0	0	0	0	0	0	0	0	0	0	0
340865_bclustnum_22_kamer_2_number_2	0	1.098612289	0	6.669316601	6.625202695	6.658011046	0	0	0	0	0	0	0	0	0	0	0	0	0	0	0	0	0	0	0	0	0	0	0	0
3408_bclustnum_533_kamer_99_number_3	1.945910149	0	0	0	0	0	0	0	0	0	0	0	0	0	0	0	0	0	0	0	0	0	0	0	6.708433229	6.689065545	6.631624895	0	0	0
34100_bclustnum_63_kamer_1_number_1	0	0	0	0	0	0	5.36043734	5.38907173	5.425751458	6.370679789	6.620679689	6.615091485	0	0	0	0	0	0	5.120171081	5.325664988	5.23498878	0	0	0	0	0	0	0	0	0
341055_bclustnum_42_kamer_1_number_1	1.098612289	1.550598322	1.386294361	0	0	0	0	0	0	2.595254707	2.772588722	2.803360381	0	0	0	0	0	0	0	0	0	0	0	0	6.891625897	6.760704336	6.858302395	0	0	0
34174_bclustnum_740_kamer_1_number_1	0	1.609437912	1.945910149	0	0	0	0	1.098612289	1.098612289	5.632404618	6.585712239	6.557251256	1.558144618	1.832581464	1.550598322	0	0	0	1.945910149	0	1.098612289	0	0	0	1.098612289	0	0	1.421386371	0	1.098612289
34175_bclustnum_110_kamer_1_number_1	6.561344619	6.608599636	6.622883919	0	0	0	0	0	0	0	0	0	0	0	0	0	0	0	0	0	0	0	0	0	0	0	0	0	0	0
341761_bclustnum_6_kamer_1_number_1	0	0	0	0	0	0	6.284134161	6.247268881	6.10791336	0	0	0	0	0	0	0	0	0	7.145125155	7.010717922	6.799055862	1.098612289	1.349925976	1.098612289	0	0	0	0	0	0
342014_bclustnum_11_kamer_1_number_1	1.098612289	0	1.098612289	0	0	0	0	0	0	0	0	0	0	0	0	0	0	0	0	0	0	0	0	0	6.704550375	6.633756495	6.706455163	0	0	0
342261_bclustnum_8_kamer_1_number_1	0	0	0	0	0	0	0	0	0	0	0	0	4.645457638	4.693382508	4.520580239	6.625723878	6.417957022	6.312540292	0	0	0	6.625833915	6.699808175	6.744942189	0	0	0	6.435616572	6.471959821	6.626717749
342392_bclustnum_90_kamer_1_number_1	0	0	0	0	0	0	3.918666886	3.999220365	3.691653104	5.24877517	4.623883985	4.8511627	6.52649486	6.403243017	6.548219103	0	0	1.098612289	1.845826164	2.146581364	1.098612289	1.098612289	1.098612289	0	0	0	0	4.591071262	4.369447852	4.543294782
34248_bclustnum_726_kamer_1_number_1	0	1.098612289	1.686398954	0	0	0	2.740840024	2.268683886	1.791759469	6.489458699	6.931149488	6.899554746	0	0	0	1.563976003	0	0	1.897120485	2.696874653	2.890371758	0	0	0	1.098612289	0	0	5.961863219	5.942799375	5.791488055
34319_bclustnum_1037_kamer_1_number_1	6.63813183	6.577243643	6.658866905	2.197224577	1.098612289	1.609437912	1.098612289	1.098612289	1.609437912	1.99242971	1.098612289	0	1.945910149	1.272966076	1.609437912	0	0	0	0	0	0	0	0	0	0	0	0	1.098612289	1.609437912	1.609437912
344310_bclustnum_32_kamer_1_number_1	0	0	0	0	0	0	2.833213344	3.135494216	2.501435952	6.410996912	7.098375639	7.044617369	0	0	0	0	0	0	0	0	0	0	0	0	0	0	0	2.047692843	1.609437912	2.251291799
344658_bclustnum_15_kamer_7_number_2	6.616734305	6.642486801	6.610696045	0	0	0	0	0	1.098612289	0	0	0	0	0	0	0	0	0	0	0	0	0	0	0	0	0	0	0	0	0
344802_bclustnum_1_kamer_1_number_1	6.661087183	6.416405432	6.505185974	0	0	0	0	0	0	0	0	0	0	0	0	0	0	0	0	0	0	0	0	0	0	0	0	0	0	0
345093_bclustnum_11_kamer_1_number_1	0	0	0	0	0	0	2.397895273	1.098612289	2.564949357	6.187808167	6.670766321	6.611593354	0	0	0	0	0	0	3.135494216	2.564949357	2.45673863	1.098612289	0	0	0	0	0	0	0	0
345383_bclustnum_26_kamer_3_number_2	0	0	0	6.641443232	6.63778214	6.636733647	0	0	0	0	0	0	0	0	0	0	0	0	0	0	0	0	0	0	0	0	0	0	0	0
345508_bclustnum_21_kamer_1_number_1	1.488076733	1.098612289	1.098612289	4.931274576	4.709530201	4.744932128	0	0	0	0	1.098612289	0	0	1.098612289	0	0	0	0	0	1.098612289	0	0	0	0	6.522092798	6.480044562	6.504886797	0	0	0
34576_bclustnum_3054_kamer_1_number_1	4.161113407	3.975668002	3.699537455	6.524214076	6.430256431	6.449416154	0	0	0	1.421386371	1.098612289	0	0	0	0	0	0	0	0	0	0	0	0	0	0	0	0	0	0	0
34576_bclustnum_508_kamer_1_number_1	6.728230208	6.785085824	6.834826458	0	0	0	0	0	0	0	0	0	0	0	0	0	0	0	0	0	0	0	0	0	0	0	0	0	0	0
345780_bclustnum_22_kamer_1_number_1	6.743536081	6.723965845	6.7606719	3.446807893	3.250374492	3.5085559	0	0	0	1.098612289	0	0	1.098612289	1.609437912	2.197224577	0	0	0	0	0	0	0	0	0	0	0	0	1.098612289	1.609437912	0
346089_bclustnum_43_kamer_1_number_1	0	0	0	0	0	0	0	0	0	6.540205706	6.105750364	6.308098442	0	0	0	0	0	0	0	0	0	0	1.098612289	1.098612289	0	0	0	0	0	0
346556_bclustnum_136_kamer_1_number_1	0	0	0	0	0	0	3.120896887	3.191845783	3.44468143	6.315358002	6.585251231	6.545827994	3.120896887	3.283415596	3.060269232	0	0	0	2.97892685	3.205454156	3.516509218	0	0	0	0	0	0	4.465908119	4.272026205	4.0831707
3469_bclustnum_847_kamer_1_number_1	1.098612289	0	0	6.573680167	6.499787041	6.5230732	0	0	0	0	0	0	0	0	0	0	0	0	0	0	0	1.098612289	0	0	0	0	0	1.526056303	1.945910149	1.824549292
347430_bclustnum_36_kamer_2_number_2	0	0	0	0	0	0	0	0	0	2.564949357	1.609437912	1.717651753	6.532750508	6.511320276	6.54350025	0	0	1.098612289	0	0	1.098612289	2.164964207	2.31677001	1.349925976	0	0	0	5.767874021	5.791704825	5.884118729
347654_bclustnum_12_kamer_1_number_1	0	0	0	0	0	0	0	0	0	6.747418672	7.565275282	7.463363046	0	0	0	0	0	0	0	0	0	0	0	0	0	0	0	0	0	0
348191_bclustnum_44_kamer_1_number_1	0	0	0	0	0	0	1.098612289	1.299283893	0	6.761109699	7.38750501	7.225044696	0	0	0	1.098612289	0	1.098612289	1.098612289	2.598562662	1.098612289	0	0	1.098612289	0	0	0	0	0	0
3485_bclustnum_31_kamer_1_number_1	0	0	2.197224577	0	0	1.098612289	0	0	1.098612289	6.557251256	6.786152457	6.953684211	1.098612289	0	1.098612289	0	0	0	0	0	0	0	0	0	0	1.609437912	0	0	0	0
348769_bclustnum_6_kamer_1_number_1	0	2.197224577	0	0	1.609437912	1.945910149	0	1.098612289	0	6.519147288	7.244406071	7.261049515	0	0	0	1.098612289	0	0	0	0	0	0	0	0	0	0	0	0	0	0
349386_bclustnum_11_kamer_13_number_2	0	0	0	0	0	0	4.038026384	4.152163684	4.538724781	6.076657814	6.724347933	6.630117262	5.338225343	5.409729037	5.38776494	3.626243123	3.986334243	3.874173672	5.25376969	5.052602233	4.767042406	5.290431354	5.158233122	5.270067058	0	0	0	4.71722127	4.45931864	4.435906207
34968_bclustnum_247_kamer_1_number_1	6.41400471	6.388001585	6.393033743	6.484024362	6.580084198	6.495567625	0	0	0	0	1.098612289	0	0	0	0	0	0	0	0	0	0	0	0	0	0	0	0	0	0	0
350093_bclustnum_26_kamer_3_number_2	1.098612289	0	1.098612289	0	0	0	1.098612289	1.904238091	0	6.893402773	7.033947304	7.005562339	5.481234579	5.400422589	5.504750066	0	0	0	1.815290432	0	1.609437912	1.098612289	1.609437912	1.550598322	0	0	1.609437912	4.510859507	4.559873612	4.356708827
35045_bclustnum_655_kamer_1_number_1	7.056459726	7.117027061	7.132050167	0	0	0	0	0	0	0	0	0	0	0	0	0	0	0	0	0	0	0	0	0	0	0	0	0	0	0
350512_bclustnum_8_kamer_1_number_1	0	0	0	0	0	0	0	0	0	5.247024072	6.899975092	7.01143939	0	0	0	0	0	0	0	0	0	0	0	0	0	0	0	0	0	0
350620_bclustnum_46_kamer_1_number_1	0	0	0	6.869675355	6.872692709	6.920493798	0	0	0	0	0	0	0	0	0	0	0	0	0	0	0	0	0	0	0	0	0	0	0	0
351092_bclustnum_56_kamer_1_number_1	0	0	1.098612289	0	0	0	6.321846849	6.588238483	6.742585781	3.305053521	2.890371758	3.020424886	0	0	0	0	0	0	6.005120874	6.000176488	6.170656211	1.098612289	1.098612289	0	0	1.098612289	0	0	0	0
351291_bclustnum_23_kamer_1_number_1	0	0	1.098612289	6.239076296	6.547645873	6.515305108	0	0	0	0	0	0	0	0	0	0	0	0	0	0	0	0	0	0	0	0	0	0	0	0
3515_bclustnum_234_kamer_1_number_1	1.098612289	0	1.098612289	0	0	0	1.098612289	0	1.098612289	2.329492811	1.776491843	2.197224577	0	1.098612289	1.481604541	1.098612289	1.864785308	0	2.236834104	1.776491843	1.098612289	2.079441542	2.36427832	2.57883709	7.264730178	7.375199385	7.24636808	1.098612289	0	0
352352_bclustnum_35_kamer_1_number_1	0	0	0	0	0	1.098612289	0	0	0	6.918982023	6.953684211	6.918982023	6.38036488	6.270988432	6.332771506	1.845826164	1.098612289	1.860752118	0	1.098612289	2.09714147	1.098612289	1.098612289	1.488076733	0	0	0	4.321922268	4.091960055	4.274679425
352455_bclustnum_18_kamer_1_number_1	0	0	0	0	0	0	0	0	0	0	0	0	6.72982407	6.697171275	6.738811045	0	0	0	0	0	0	0	0	0	0	0	0	0	0	0
353737_bclustnum_34_kamer_1_number_1	1.098612289	0	0	0	0	0	0	0	0	0	0	0	0	0	0	0	0	0	0	0	0	0	0	0	6.444131257	6.448745396	6.541555114	0	0	0
35376_bclustnum_52_kamer_1_number_1	0	1.098612289	1.098612289	6.104235041	6.54333614	6.299561192	1.098612289	1.098612289	0	3.788724789	3.277144733	3.198673118	0	0	0	0	0	0	0	0	0	1.098612289	0	0	0	0	1.098612289	1.098612289	0	0
353_bclustnum_6722_kamer_1_number_1	6.899218948	7.032880186	6.936099752	5.470466526	5.55129541	5.306141677	0	0	0	0	0	0	0	0	0	0	0	0	0	0	0	0	0	0	2.069780019	2.024381953	1.609437912	0	0	0
354167_bclustnum_72_kamer_1_number_1	6.166117189	6.258305316	6.199155317	6.659151602	6.555988271	6.66596648	0	0	0	1.913649615	0	0	1.098612289	0	1.098612289	0	0	0	1.098612289	1.098612289	1.098612289	0	0	0	0	0	0	4.887005198	4.837162472	4.797623575
354190_bclustnum_46_kamer_1_number_1	0	0	0	0	0	0	0	0	0	6.775855697	6.569882462	6.597145702	0	0	0	0	0	1.098612289	0	0	0	0	0	0	0	0	0	0	0	0
35453_bclustnum_67_kamer_21_number_3	6.59558514	6.612233221	6.59089016	0	0	0	0	0	0	0	0	0	0	0	0	0	0	0	0	0	0	0	0	0	0	0	0	0	0	0
354977_bclustnum_10_kamer_1_number_1	0	0	0	0	0	0	4.606598166	4.688720581	4.562858541	6.078625705	6.659787388	6.536069665	0	0	0	0	0	0	6.17586727	5.915045059	5.862818345	0	0	0	0	0	0	0	0	1.098612289
355090_bclustnum_3_kamer_1_number_1	1.887069649	1.098612289	0	0	0	0	0	0	1.435084525	0	0	0	0	0	0	0	0	0	0	1.335001067	1.526056303	0	0	0	6.719531136	6.46481102	6.504662355	0	0	0
355264_bclustnum_21_kamer_1_number_1	0	0	0	0	0	0	0	0	0	6.073965769	6.959816279	7.037317555	0	0	0	0	0	0	0	0	0	0	1.098612289	0	0	0	0	0	0	0
355482_bclustnum_15_kamer_1_number_1	6.65415252	6.732210706	6.747879911	0	1.098612289	0	0	0	0	0	0	0	0	0	0	0	0	0	0	0	0	0	0	0	0	0	0	0	0	0
355608_bclustnum_1_kamer_1_number_1	1.098612289	0	0	0	0	0	0	0	0	0	0	0	0	0	0	0	0	0	0	0	0	0	0	0	6.668228248	6.620073207	6.588008587	0	0	0
3558_bclustnum_505_kamer_1_number_1	6.673859125	6.715652441	6.696073292	3.828641396	3.63758616	2.442347035	0	0	0	0	0	0	0	0	0	0	0	0	0	0	0	0	0	0	0	0	0	0	0	0
356034_bclustnum_6_kamer_61_number_4	0	1.098612289	1.098612289	0	0	0	0	0	0	0	0	0	0	0	0	0	0	0	0	0	0	0	0	0	6.666107832	6.430870428	6.723030437	0	0	0
356070_bclustnum_41_kamer_1_number_1	0	0	0	0	0	0	1.098612289	1.098612289	0	6.717804695	6.671188285	6.717401954	0	0	0	0	0	0	0	1.098612289	0	0	0	0	0	0	0	0	0	0
356098_bclustnum_42_kamer_1_number_1	1.098612289	0	0	6.562242096	6.564660562	6.538139824	0	0	0	0	0	0	0	1.098612289	0	0	0	1.098612289	1.609437912	0	1.098612289	1.098612289	0	0	0	0	0	0	0	0
3560_bclustnum_109_kamer_1_number_1	0	0	0	0	0	0	3.548179572	3.676300672	4.051784948	6.550059814	6.822664602	6.838098616	0	1.098612289	1.098612289	0	1.098612289	0	4.971547905	4.577284982	4.92180408	0	0	0	0	0	0	0	0	0
356230_bclustnum_25_kamer_1_number_1	0	0	0	6.50744337	6.482598047	6.52649486	0	0	0	0	0	0	0	0	0	0	0	0	0	0	0	0	0	0	0	0	0	1.098612289	1.098612289	0
356444_bclustnum_22_kamer_1_number_1	1.098612289	0	0	0	0	0	1.913649615	1.734601644	2.007467445	6.149322632	6.61636233	6.645957954	1.098612289	0	0	1.098612289	1.098612289	0	1.098612289	2.23084094	2.377486607	0	1.609437912	1.516348465	0	0	0	0	0	0
356927_bclustnum_51_kamer_1_number_1	1.609437912	1.098612289	1.887069649	0	1.098612289	0	0	0	0	0	1.098612289	1.098612289	6.623533878	6.635684054	6.575633565	1.098612289	0	0	0	0	1.098612289	0	0	1.098612289	0	0	0	5.699104885	5.545958389	5.722931293
356989_bclustnum_21_kamer_3_number_2	0	0	0	0	0	0	1.516348465	1.563976003	1.098612289	6.877181632	6.518983558	6.589231795	1.609437912	1.299283893	0	1.516348465	1.810108426	1.945910149	0	1.098612289	1.098612289	3.191845783	3.482949397	2.956065861	0	0	1.098612289	0	0	0
357348_bclustnum_15_kamer_1_number_1	0	0	0	6.827900054	6.969123154	6.982732873	0	0	0	0	0	0	0	0	0	0	1.098612289	0	0	0	0	0	0	0	0	0	0	0	0	0
357441_bclustnum_3_kamer_1_number_1	6.515136305	6.450018503	6.495481545	0	0	0	1.098612289	0	0	0	0	0	1.098612289	1.098612289	1.098612289	0	0	0	1.526056303	0	1.824549292	0	0	0	1.098612289	0	0	0	0	0
357663_bclustnum_13_kamer_1_number_1	1.897120485	0	1.652922599	0	0	0	0	0	0	0	0	0	0	0	0	0	0	0	0	0	0	0	0	0	6.579405367	6.74222476	6.654581552	0	0	0
358164_bclustnum_30_kamer_1_number_1	0	0	0	6.409627035	6.372751369	6.561030666	0	0	0	0	0	0	0	0	0	0	0	0	0	0	0	0	0	1.098612289	0	0	0	0	0	0
358366_bclustnum_31_kamer_1_number_1	1.098612289	0	1.098612289	0	0	0	0	0	1.098612289	6.668863371	7.067319849	6.835614601	0	0	0	1.455286233	2.595254707	2.421851472	0	1.098612289	0	2.212973247	2.136137279	1.669156712	0	0	0	0	0	0
359178_bclustnum_13_kamer_1_number_1	0	0	0	1.098612289	0	0	4.731309323	4.66029264	4.699470765	6.128082422	6.733534026	6.667663921	5.208272302	5.027531742	5.028985887	2.093234727	2.693126055	2.833213344	1.098612289	0	0	4.792114375	4.86668024	4.812184355	0	0	0	4.539742737	4.621702767	4.859812404
35954_bclustnum_411_kamer_1_number_1	1.098612289	0	1.098612289	0	0	1.098612289	0	0	0	10.45214928	0	0	1.609437912	0	1.098612289	1.945910149	2.120263136	1.897120485	0	0	0	1.791759469	1.526056303	2.197224577	3.020424886	2.397895273	2.564949357	0	0	0
359977_bclustnum_0_kamer_1_number_1	0	0	1.098612289	0	1.098612289	0	0	0	0	6.471959821	7.268397343	7.445335778	0	0	0	2.224623552	1.639744008	2.251291799	0	1.098612289	0	1.745238977	1.686398954	1.99242971	0	0	0	0	0	0
360235_bclustnum_5_kamer_1_number_1	0	0	0	0	0	0	0	0	0	6.217603607	6.66057515	6.61427912	0	0	0	0	0	0	0	1.098612289	1.098612289	0	0	0	1.098612289	0	0	0	0	0
360282_bclustnum_56_kamer_4_number_2	0	0	0	6.775594375	6.680854679	6.771935556	0	0	0	0	0	0	0	0	0	0	0	0	0	0	0	0	0	0	0	0	0	0	0	0
36086_bclustnum_1090_kamer_1_number_1	0	0	0	6.825894253	6.900327763	6.92027656	0	0	0	0	0	0	0	0	0	1.098612289	1.098612289	1.098612289	0	0	0	1.098612289	1.904238091	1.098612289	0	0	0	0	0	0
361081_bclustnum_26_kamer_1_number_1	0	0	0	0	0	0	0	0	0	6.088541347	6.823286122	6.810631856	0	0	0	0	0	0	0	0	0	0	0	0	0	0	0	0	0	1.098612289
361415_bclustnum_29_kamer_1_number_1	1.098612289	0	1.098612289	0	0	0	0	0	0	0	0	0	0	0	0	0	0	0	0	0	0	0	0	0	6.663132696	6.642704509	6.771935556	0	0	0
361668_bclustnum_13_kamer_1_number_1	0	1.098612289	0	0	0	0	3.650658241	3.544905152	3.560099612	6.924897508	6.296057201	6.376970116	0	0	0	0	1.098612289	0	3.231108697	2.917770732	2.944438979	1.098612289	1.098612289	0	0	0	0	0	0	1.098612289
361867_bclustnum_25_kamer_1_number_1	6.532334292	6.385194399	6.376386754	1.098612289	0	1.098612289	1.540445755	1.540445755	1.757857918	2.756840365	2.649212731	2.63905733	0	0	0	0	0	1.299283893	2.437500527	2.602689685	2.233591864	1.504077397	1.098612289	1.098612289	0	1.098612289	0	3.496507561	3.604894402	3.448220907
3619_bclustnum_2_kamer_1_number_1	1.098612289	0	0	0	0	0	4.288350369	4.373335224	4.294665651	4.768725079	6.587231782	6.509457425	1.098612289	1.098612289	0	0	0	0	2.528803911	2.491294537	1.853891973	0	0	1.098612289	0	0	0	0	0	1.098612289
3620_bclustnum_1361_kamer_1_number_1	0	0	0	0	0	0	2.007467445	0	0	6.195084752	6.662849131	6.671611338	0	0	1.098612289	5.535142891	5.071692763	5.186144813	0	0	0	6.02827852	6.160033637	6.115892125	0	0	0	5.153291594	5.058790336	5.033048889
362342_bclustnum_20_kamer_1_number_1	1.35812377	1.665006953	2.061422673	0	0	0	1.408767439	1.098612289	1.098612289	6.572791504	6.793364109	6.796011098	5.914240571	5.791072702	5.867498687	1.098612289	1.806797496	1.488076733	0	1.645156346	1.098612289	1.694594904	1.098612289	1.679642849	0	0	0	5.418519696	5.260802398	5.326550047
36267_bclustnum_210_kamer_1_number_1	1.836211667	1.315676062	2.047692843	0	0	0	4.89160398	5.161924742	4.996083258	3.521445525	4.32713873	3.9480328	1.609437912	1.526056303	1.335001067	1.518466706	1.609437912	1.098612289	6.474484656	6.51939357	6.260170201	1.806797496	2.329492811	2.063693185	1.609437912	1.098612289	1.098612289	0	0	0
362792_bclustnum_18_kamer_1_number_1	0	0	0	0	0	0	4.23732162	4.118132701	4.143134726	1.704748092	1.098612289	0	1.098612289	1.098612289	1.609437912	6.784683281	6.26034599	6.262254752	4.858089992	4.59736178	4.401829262	6.955973851	6.923628628	6.911548077	0	0	1.098612289	1.734601644	2.014903021	1.945910149
362860_bclustnum_11_kamer_1_number_1	0	0	0	0	0	1.098612289	1.098612289	0	0	5.976713788	6.905084716	6.922811365	3.385931448	3.36729583	3.891820298	0	0	1.098612289	1.098612289	0	0	0	1.098612289	0	0	0	0	0	1.533929576	1.533929576
36321_bclustnum_38_kamer_1_number_1	0	0	0	6.578209002	6.70533305	6.666956792	0	0	0	0	0	0	0	0	0	0	0	0	0	0	0	1.098612289	0	0	0	0	0	0	0	0
364113_bclustnum_67_kamer_1_number_1	0	0	0	0	0	1.098612289	4.090169191	3.63758616	3.921973336	6.467181512	6.549650742	6.575424455	0	0	0	0	0	0	4.297285406	4.415824014	4.791649753	1.098612289	1.098612289	0	0	0	0	0	0	0
364499_bclustnum_59_kamer_1_number_1	0	0	0	0	0	0	7.558516743	7.50851301	7.540887027	5.354224998	5.206750173	5.12693575	5.955189491	5.890953366	6.01980902	1.098612289	1.832581464	2.374905755	7.554989403	7.598775199	7.566828479	2.708050201	2.079441542	1.909542505	0	0	0	2.772588722	2.327277706	2.691243083
364706_bclustnum_36_kamer_1_number_1	6.615171881	6.579713605	6.593500595	0	0	0	0	0	0	0	0	0	2.501435952	3.577947893	3.339321978	1.609437912	1.098612289	1.609437912	0	0	1.098612289	1.526056303	1.526056303	1.098612289	0	0	0	0	0	0
364775_bclustnum_36_kamer_1_number_1	6.940222469	6.679850411	6.880384082	2.923161581	1.098612289	1.609437912	0	0	0	0	0	0	0	0	0	0	0	0	0	0	0	0	0	0	0	0	0	0	0	0
36492_bclustnum_107_kamer_1_number_1	0	0	0	0	0	0	3.722401267	3.830615534	3.997365491	6.605544169	7.070103694	6.999504581	0	0	0	5.418519696	5.078293943	4.961676116	4.770684624	4.428830303	4.509025958	5.665848666	5.790516591	5.840906157	0	0	0	0	1.36330461	0
364955_bclustnum_12_kamer_1_number_1	0	0	0	0	0	0	0	0	0	6.416913639	6.547741912	6.621405652	0	1.098612289	1.098612289	0	0	1.098612289	1.609437912	1.098612289	0	1.098612289	0	0	0	0	0	0	0	0
365486_bclustnum_39_kamer_1_number_1	0	0	0	0	0	0	2.079441542	1.550598322	1.609437912	6.670484912	7.010537474	7.02687076	1.098612289	1.098612289	1.098612289	2.079441542	2.112964563	2.256064601	0	1.098612289	1.098612289	2.120263136	2.624668592	2.261763098	0	0	0	0	0	0
365775_bclustnum_31_kamer_1_number_1	1.32175584	0	0	6.671273163	6.69950034	6.748525053	0	0	0	1.098612289	0	0	0	0	0	0	0	0	0	0	0	0	1.098612289	0	0	0	0	0	0	0
365931_bclustnum_15_kamer_12_number_2	6.485779619	6.460295614	6.56526497	0	1.098612289	0	0	0	0	0	0	0	0	0	1.098612289	0	0	0	0	0	0	1.098612289	0	0	0	1.098612289	1.098612289	0	0	0
366104_bclustnum_94_kamer_1_number_1	0	0	0	6.723231299	6.611772181	6.646130741	1.098612289	0	0	0	0	0	0	0	0	0	0	0	0	0	0	0	0	0	0	0	0	0	0	0
366634_bclustnum_14_kamer_1_number_1	1.098612289	0	1.098612289	0	0	0	3.33220451	4.104294893	4.036008985	5.054122534	6.501289671	6.217603607	0	0	0	0	0	0	3.202746443	2.985681938	3.280911216	0	0	0	0	1.098612289	0	0	0	0
366825_bclustnum_27_kamer_1_number_1	6.352380236	6.573680167	6.505286178	2.730026934	2.813412717	0	0	1.098612289	1.098612289	0	0	0	0	0	0	0	1.098612289	0	1.098612289	1.945910149	0	1.609437912	0	1.4663363	0	0	0	0	1.098612289	1.098612289
366944_bclustnum_22_kamer_1_number_1	0	0	0	6.722629795	6.680137985	6.657643841	0	1.098612289	0	0	0	0	0	0	0	0	0	0	0	0	0	0	0	0	0	0	0	2.197224577	2.929287938	2.669212348
36710_bclustnum_864_kamer_1_number_1	4.128924717	4.293498654	4.217872546	6.521602972	6.595932142	6.481917041	0	0	0	1.098612289	0	0	0	0	0	0	0	0	0	0	0	0	0	0	0	0	0	0	0	0
367345_bclustnum_56_kamer_3_number_2	0	0	0	6.710871404	6.72982407	6.774223886	0	0	0	0	0	0	0	0	0	0	0	0	0	0	0	0	0	0	0	0	0	1.098612289	0	0
3681_bclustnum_555_kamer_1_number_1	0	0	0	0	0	0	0	0	0	0	0	0	6.852594516	6.850126166	6.943768932	0	0	1.098612289	0	0	0	0	0	0	0	0	0	0	0	0
368507_bclustnum_33_kamer_1_number_1	0	0	0	6.513230111	6.555072356	6.65929392	0	0	0	0	1.098612289	0	0	0	0	0	0	0	0	0	0	0	0	0	0	0	0	0	0	0
368584_bclustnum_1_kamer_1_number_1	0	0	0	0	0	0	6.54333614	6.432135911	6.456769656	1.299283893	1.609437912	1.098612289	0	0	0	0	0	1.550598322	4.848900371	4.693181063	4.669083512	2.061422673	2.036882362	2.197224577	1.446918983	1.098612289	1.540445755	0	1.098612289	1.098612289
368799_bclustnum_12_kamer_1_number_1	0	0	1.526056303	0	0	0	0	0	0	0	0	0	0	1.098612289	0	0	0	0	0	0	0	1.098612289	1.098612289	0	6.512339507	6.424220515	6.418364936	0	0	0
368901_bclustnum_10_kamer_1_number_1	0	0	1.098612289	0	0	0	0	0	0	6.246106765	7.08857571	6.98230601	2.128231706	3.08190997	3.164068997	0	0	0	0	0	0	1.098612289	1.563976003	1.563976003	0	1.098612289	0	2.397895273	2.517696473	2.48490665
368935_bclustnum_21_kamer_1_number_1	0	0	0	0	0	1.098612289	0	0	0	6.537313144	6.110136077	5.986871515	0	1.098612289	0	1.098612289	1.098612289	1.609437912	0	0	0	1.098612289	0	1.098612289	0	0	0	0	0	0
369636_bclustnum_45_kamer_1_number_1	6.949472872	6.913140751	6.725834042	0	0	0	0	0	0	0	0	0	0	0	0	0	0	0	0	0	0	0	0	0	0	0	0	0	0	0
369704_bclustnum_14_kamer_1_number_1	0	0	0	0	0	0	2.351375257	2.621038824	2.140066163	6.540389101	6.739632442	6.726233402	6.399426535	6.556778356	6.470799504	0	0	0	1.871802177	2.1690537	1.665006953	0	0	0	0	0	0	3.912023005	3.891820298	3.218875825
369_bclustnum_7944_kamer_1_number_1	0	0	0	0	0	0	0	0	0	0	0	0	7.107753021	7.092906163	6.981934677	0	0	0	0	0	0	0	0	0	0	0	0	0	0	1.098612289
370496_bclustnum_32_kamer_1_number_1	0	0	0	0	0	0	0	0	0	6.641907755	7.135241388	7.13169851	1.098612289	0	1.098612289	0	0	0	0	0	0	0	1.550598322	1.098612289	0	0	0	1.609437912	1.098612289	1.098612289
370719_bclustnum_2_kamer_1_number_1	1.098612289	1.098612289	0	0	0	0	0	0	0	0	0	0	0	0	0	0	0	0	0	0	0	0	0	0	6.633976112	6.578903929	6.513230111	0	0	0
370_bclustnum_1983_kamer_1_number_1	0	0	0	0	0	0	0	1.098612289	0	5.895903086	6.506870167	6.391307212	0	0	0	0	1.098612289	1.098612289	1.098612289	0	0	0	0	0	0	0	0	0	0	1.098612289
371_bclustnum_9161_kamer_1_number_1	6.585251231	6.432045802	6.523236262	5.705634093	5.716662503	5.616771098	0	0	0	0	0	0	0	0	0	0	0	0	0	0	0	0	0	0	0	0	0	0	0	0
372103_bclustnum_0_kamer_1_number_1	3.663561646	3.896344741	4.204692619	0	0	0	1.098612289	1.098612289	1.098612289	0	0	0	6.538139824	6.575075841	6.474061978	1.098612289	0	0	1.098612289	1.098612289	0	1.098612289	0	0	0	0	0	0	0	0
372175_bclustnum_10_kamer_1_number_1	0	0	0	0	0	0	0	0	0	5.784440378	6.813287444	6.92591931	0	0	0	1.098612289	1.435084525	1.435084525	1.098612289	0	0	1.435084525	1.824549292	1.609437912	0	0	0	0	0	0
372824_bclustnum_17_kamer_1_number_1	1.098612289	0	1.76766143	0	0	0	0	0	0	0	0	0	0	0	0	0	0	0	0	0	0	0	0	0	6.680540953	6.56983199	6.616399801	0	0	0
372965_bclustnum_5_kamer_1_number_1	0	0	0	6.515453157	6.525029658	6.457554277	0	0	0	1.098612289	1.945910149	1.945910149	0	0	0	0	0	0	0	0	0	0	0	0	0	0	0	0	0	0
373334_bclustnum_11_kamer_1_number_1	0	0	0	0	0	0	1.945910149	2.351375257	1.504077397	2.197224577	2.740840024	2.32238772	0	0	0	6.632407492	6.408782466	6.365545622	2.564949357	2.624668592	2.197224577	6.34738921	6.273312761	6.312293637	0	0	0	0	0	0
373478_bclustnum_4_kamer_1_number_1	0	0	0	0	0	0	0	2.061422673	1.845826164	6.472003114	7.448001831	7.469249302	0	1.098612289	0	1.098612289	1.488076733	1.098612289	1.967650673	1.098612289	1.36687706	1.734601644	1.098612289	1.609437912	0	0	0	0	0	0
37366_bclustnum_1005_kamer_1_number_1	0	0	0	0	0	0	4.814093102	5.505782654	5.045146216	6.517375808	6.331304321	6.265090164	0	1.773067525	1.880313545	2.54770929	1.734601644	1.734601644	5.392290289	5.641314697	5.951683677	1.734601644	1.810108426	1.810108426	0	0	0	0	1.098612289	0
373698_bclustnum_2_kamer_1_number_1	0	0	0	3.218875825	2.685579618	3.729702249	5.179911012	5.192956851	5.006178712	6.589843526	6.748369084	6.70073111	6.159095388	6.278521424	6.188947668	4.862390474	5.334326196	4.985884847	5.541263545	5.510735607	5.664116062	6.149179581	6.052872392	6.126869184	0	0	0	0	1.098612289	0
374065_bclustnum_39_kamer_1_number_1	0	0	0	0	0	0	1.845826164	0	1.236761337	6.620814265	6.812833424	6.803258834	1.860752118	2.397895273	1.609437912	1.609437912	2.120263136	1.977162385	0	1.098612289	0	1.880313545	2.197224577	1.945910149	0	0	0	3.663561646	3.947390149	3.100092289
374105_bclustnum_8_kamer_1_number_1	0	0	0	0	0	0	0	0	0	6.014326216	6.757098654	6.554289466	2.228476659	1.945910149	1.421386371	4.896772066	4.88388467	4.769743504	0	1.098612289	1.098612289	6.151819512	6.074688344	6.087099674	0	0	0	4.589331412	4.724853637	4.739954543
37420_bclustnum_116_kamer_1_number_1	1.098612289	0	1.098612289	0	0	0	0	0	0	0	0	0	0	0	0	0	1.098612289	0	0	0	0	0	0	0	6.40984588	6.665174034	6.45393991	0	0	0
374340_bclustnum_22_kamer_1_number_1	6.974170164	6.98348408	7.049975068	6.225637055	6.238857686	6.278862829	0	0	0	0	0	0	0	0	0	0	0	0	0	0	0	0	0	0	0	0	0	0	0	0
374983_bclustnum_7_kamer_1_number_1	0	0	0	0	0	0	0	0	0	6.920345686	6.965552378	6.912245184	4.633106313	4.53044664	4.650783882	5.196655558	5.31238298	5.272142781	0	1.315676062	1.098612289	5.902086736	6.034524037	6.110580028	0	0	0	0	0	1.098612289
3750_bclustnum_102_kamer_1_number_1	1.098612289	0	0	0	0	0	0	0	1.098612289	6.580084198	7.507799841	7.536577249	2.104134154	1.824549292	0	0	0	0	0	1.098612289	1.609437912	0	0	0	0	0	0	0	0	0
375593_bclustnum_43_kamer_1_number_1	5.562602861	5.088281286	5.258796608	0	1.098612289	0	0	0	0	6.692496809	7.494986234	7.519871347	1.098612289	1.945910149	0	0	1.098612289	1.098612289	0	1.098612289	0	0	0	0	0	0	0	0	1.098612289	0
375629_bclustnum_37_kamer_1_number_1	6.513230111	6.462717396	6.445719819	6.339653587	6.437431599	6.33221334	0	1.098612289	0	1.098612289	0	0	0	0	0	0	0	0	0	0	0	0	0	0	0	0	0	0	0	0
375686_bclustnum_11_kamer_9_number_2	3.465735903	3.682609841	3.135494216	3.772760938	3.855452654	3.630985476	4.65396035	4.553876892	4.574710979	6.03667689	6.501289671	6.488064464	4.859812404	4.722953222	4.978456396	3.610917913	2.691243083	3.124565145	5.129898715	4.681102921	4.978456396	4.973279508	4.818263401	4.865609522	1.098612289	0	1.446918983	4.551241844	4.33073334	4.590056548
376044_bclustnum_66_kamer_1_number_1	0	0	0	6.673929879	6.590644396	6.708389288	0	0	0	0	0	0	0	0	0	0	0	0	0	0	0	0	0	0	0	0	0	0	0	0
3761_bclustnum_1133_kamer_1_number_1	6.28692876	6.283624703	6.595780514	5.837243448	6.436837632	5.831392621	1.098612289	1.098612289	1.098612289	1.098612289	1.098612289	0	1.386294361	1.098612289	1.299283893	1.386294361	1.791759469	0	1.098612289	0	0	0	1.580449787	1.098612289	0	0	0	0	1.098612289	0
376296_bclustnum_5_kamer_1_number_1	0	0	0	0	0	0	1.241713577	0	0	6.554883095	5.926037631	5.828945618	0	0	0	0	0	0	1.526056303	0	0	0	0	0	1.098612289	1.098612289	0	0	0	0
376552_bclustnum_64_kamer_4_number_2	0	0	0	0	0	0	0	0	0	5.96955886	6.830874235	6.778215908	0	0	0	0	0	0	0	0	0	0	0	0	0	0	0	0	0	0
376992_bclustnum_51_kamer_1_number_1	0	0	0	0	0	0	4.305565319	4.588362729	4.570119008	7.074683971	7.103782483	7.093495984	0	1.098612289	2.377486607	0	0	0	4.780987301	4.647587707	4.560870276	0	1.098612289	0	0	0	0	0	0	0
376999_bclustnum_28_kamer_1_number_1	0	0	0	6.884145755	6.945850359	6.924936827	0	0	0	0	0	0	0	0	0	0	0	0	0	0	0	0	0	0	0	0	0	0	0	0
37699_bclustnum_472_kamer_1_number_1	0	0	0	0	0	0	5.407171771	5.509388337	5.383838884	6.883902039	6.521042247	6.394307888	0	0	0	0	0	0	5.374616151	5.637336357	5.342334252	0	0	0	0	0	0	0	0	0
377282_bclustnum_21_kamer_1_number_1	0	0	0	0	0	0	0	0	0	6.51174533	6.312944603	6.340359304	0	0	0	0	0	0	0	1.098612289	0	0	0	0	0	0	0	0	0	1.098612289
378219_bclustnum_18_kamer_1_number_1	0	1.098612289	1.098612289	0	0	0	2.120263136	2.172223528	2.63108996	6.505185974	6.661428819	6.624950626	1.413693065	0	0	0	0	1.098612289	2.662585501	2.779508475	2.932675321	1.098612289	0	0	0	0	0	0	0	0
378243_bclustnum_24_kamer_3_number_2	1.098612289	1.098612289	1.098612289	0	0	0	0	0	0	0	0	0	0	0	0	0	0	0	0	0	0	0	0	0	7.157400537	7.061703081	7.203301349	0	0	0
378263_bclustnum_24_kamer_1_number_1	0	0	0	0	0	0	5.691034902	5.655292265	5.73204594	6.586723227	5.850476854	5.95376268	0	0	0	0	0	0	5.723585102	5.735926928	5.939644798	0	1.488076733	0	0	0	0	0	0	1.098612289
37859_bclustnum_33_kamer_1_number_1	6.832312724	6.720220155	6.71417053	0	0	0	0	0	0	0	0	0	0	0	0	2.505525937	1.563976003	1.609437912	0	0	0	1.609437912	1.974081026	1.749199855	0	0	0	0	0	0
378685_bclustnum_21_kamer_1_number_1	0	0	0	0	0	0	0	0	0	6.001414878	6.557792047	6.549241503	0	0	0	0	0	0	0	0	0	1.098612289	0	0	0	0	0	1.098612289	0	0
37916_bclustnum_62_kamer_1_number_1	6.768875897	6.749019772	6.758352311	0	0	1.098612289	0	0	0	1.098612289	0	0	0	0	0	0	0	0	0	0	0	0	1.098612289	0	0	0	1.098612289	0	1.098612289	1.098612289
37957_bclustnum_94_kamer_1_number_1	6.882642578	6.937314081	6.915326544	1.098612289	1.098612289	1.609437912	0	0	0	0	0	0	0	0	0	0	0	0	0	0	0	0	0	0	0	0	0	0	0	0
38008_bclustnum_136_kamer_1_number_1	2.172223528	1.609437912	2.240709689	6.584515111	6.563291192	6.561596277	0	0	0	0	0	0	0	0	0	0	0	0	0	0	0	0	0	1.098612289	0	0	0	2.291411905	2.833213344	2.63905733
380958_bclustnum_21_kamer_1_number_1	0	0	0	0	0	0	1.871802177	1.098612289	1.098612289	6.318968114	6.508769137	6.501074933	0	0	0	0	1.098612289	1.098612289	0	1.421386371	1.152680563	0	0	1.098612289	0	0	0	0	1.098612289	0
381422_bclustnum_7_kamer_1_number_1	0	0	0	0	0	0	1.098612289	1.609437912	1.098612289	0	0	0	6.510555915	6.43775165	6.549650742	1.098612289	0	1.098612289	1.098612289	1.098612289	1.686398954	0	0	1.386294361	0	0	0	3.678829118	3.265759411	3.346389145
381509_bclustnum_62_kamer_1_number_1	6.675823222	6.582025139	6.56526497	2.21557408	3.195754577	2.335374593	0	0	0	0	0	0	0	0	0	0	1.098612289	0	0	0	0	0	0	1.098612289	1.098612289	1.098612289	1.098612289	1.098612289	1.098612289	1.4663363
381690_bclustnum_5_kamer_1_number_1	1.098612289	1.098612289	1.609437912	1.098612289	0	0	0	0	0	0	1.098612289	1.098612289	6.390240667	6.337710296	6.513017922	0	0	0	0	0	0	0	0	0	0	0	1.098612289	2.472926844	2.90416508	2.726917751
381_bclustnum_170_kamer_7_number_2	0	1.098612289	0	0	0	0	0	0	0	0	0	0	0	0	0	0	0	0	0	0	0	0	0	0	6.531362933	6.507277712	6.517179276	0	0	0
382206_bclustnum_7_kamer_1_number_1	0	0	0	0	0	0	0	0	0	6.490723535	6.769928962	6.70073111	0	0	0	0	0	0	0	0	0	0	0	0	0	0	0	0	0	0
382692_bclustnum_22_kamer_1_number_1	0	0	0	0	0	0	0	0	1.098612289	5.628818239	6.576469569	6.607551132	0	1.098612289	1.098612289	0	0	0	0	1.609437912	0	1.540445755	0	0	0	0	0	0	0	0
383488_bclustnum_4_kamer_1_number_1	0	0	0	0	0	0	0	0	0	5.680793577	6.51174533	6.398594935	0	0	0	0	0	0	0	0	0	0	0	0	0	0	0	0	0	0
38364_bclustnum_1276_kamer_1_number_1	0	0	0	6.371122839	6.507064257	6.481139055	1.098612289	0	0	0	0	0	0	0	1.098612289	0	0	0	0	0	0	0	0	0	0	0	0	0	0	0
383784_bclustnum_20_kamer_1_number_1	0	1.098612289	0	0	1.098612289	0	5.019482707	5.175120955	4.94401817	6.044358185	4.427565089	4.562610224	1.76766143	2.490449593	2.164964207	1.098612289	1.098612289	1.098612289	6.561973644	6.312037849	6.457292282	0	0	1.098612289	0	0	0	2.908719078	2.737246478	2.564949357
3838_bclustnum_6000_kamer_1_number_1	5.793013608	6.034684464	5.864849184	0	1.098612289	0	0	1.098612289	1.098612289	2.233591864	0	1.098612289	1.098612289	0	0	0	1.609437912	0	6.43668388	6.457292282	6.546785411	0	1.098612289	0	0	0	0	0	0	0
384098_bclustnum_44_kamer_1_number_1	0	0	0	0	0	0	0	0	0	6.389569301	6.617670322	6.641965153	0	0	0	1.098612289	1.098612289	1.098612289	1.665006953	0	0	1.824549292	0	1.280933845	0	0	0	4.332194115	4.230881018	4.250081127
38464_bclustnum_977_kamer_10_number_2	0	0	1.098612289	0	0	0	5.698769933	5.841368138	5.754158682	7.241187184	7.830723666	7.824046011	6.049143659	5.992089352	6.097512327	5.267858159	4.853981484	5.146039931	6.678970848	6.357408897	6.552507887	5.940828931	6.042632834	6.077068684	0	0	0	5.321789723	5.336335434	5.393627546
38470_bclustnum_160_kamer_1_number_1	6.690842277	6.652863029	6.7606719	0	0	0	0	0	0	0	0	0	0	0	0	0	1.098612289	0	1.098612289	0	0	0	0	1.098612289	0	0	0	0	0	0
38481_bclustnum_166_kamer_1_number_1	6.70584348	6.753049278	6.763307375	0	1.945910149	0	0	0	0	0	0	0	0	0	0	0	0	0	0	0	0	0	0	0	0	0	0	0	0	0
384845_bclustnum_12_kamer_1_number_1	0	0	0	0	0	0	0	0	0	0	0	0	6.638754944	6.693678004	6.628041376	0	0	0	0	0	0	0	0	0	0	0	0	0	0	0
385280_bclustnum_26_kamer_5_number_2	0	0	0	0	0	0	0	0	0	6.527665477	6.879972898	6.844815479	0	0	0	0	0	0	1.098612289	0	0	0	0	0	0	0	0	0	0	0
385425_bclustnum_3_kamer_1_number_1	1.945910149	1.824549292	2.533696814	0	0	0	4.671126452	4.636494419	4.334315076	6.517671273	5.941367905	5.996225695	1.349925976	0	0	1.098612289	0	0	5.121251972	5.386580044	5.387408247	0	1.098612289	1.098612289	0	0	0	0	0	0
3867_bclustnum_331_kamer_1_number_1	0	1.098612289	0	1.098612289	0	0	0	0	1.098612289	6.788971743	7.548181831	7.444248649	0	0	0	0	0	0	0	0	0	1.098612289	0	0	2.496744637	2.197224577	1.299283893	0	0	0
387_bclustnum_6312_kamer_1_number_1	0	0	0	0	0	0	0	0	0	6.29710932	6.687801635	6.489896182	0	0	1.098612289	0	0	0	0	1.098612289	0	0	0	0	1.203971804	2.197224577	1.098612289	0	0	0
3888_bclustnum_4377_kamer_2_number_2	0	0	0	0	0	0	0	0	0	6.2581464	6.835338338	6.836259277	1.098612289	0	0	0	1.098612289	1.098612289	0	0	1.098612289	1.540445755	1.098612289	1.098612289	1.609437912	1.098612289	0	0	0	0
38995_bclustnum_217_kamer_1_number_1	6.50353939	6.64898455	6.599189996	5.774551546	5.645446898	5.772997544	0	0	0	0	0	0	1.098612289	0	1.098612289	0	0	0	0	0	0	1.098612289	1.098612289	0	0	0	0	0	0	0
389_bclustnum_6388_kamer_1_number_1	6.030952052	6.032486522	6.100879333	6.447305863	6.510093148	6.499119148	0	1.098612289	0	1.791759469	1.098612289	0	0	0	0	0	0	0	0	0	0	0	0	1.098612289	0	0	0	1.098612289	0	0
3912_bclustnum_1942_kamer_1_number_1	0	0	0	0	0	0	0	1.421386371	0	5.820578357	6.491986773	6.557488331	1.098612289	1.694594904	0	0	0	1.098612289	1.540445755	1.098612289	1.540445755	0	0	1.098612289	0	0	0	1.609437912	0	1.871802177
3912_bclustnum_3624_kamer_1_number_1	0	0	0	4.399375273	4.541164856	4.433194921	5.029129877	4.98223582	5.013298412	6.089369086	6.972840526	7.452402451	5.604330396	5.51504035	5.67057034	5.063385859	4.902091941	4.774313625	5.302473717	5.241747015	4.949646022	5.961520671	6.048789614	5.618329882	0	0	1.386294361	4.782479201	4.547541073	4.746669748
39137_bclustnum_439_kamer_1_number_1	0	0	0	7.580357857	7.549082711	7.441150287	0	0	0	0	0	0	0	0	0	0	0	0	0	0	0	0	0	0	0	0	0	0	0	0
39150_bclustnum_418_kamer_1_number_1	0	1.098612289	0	0	0	0	0	0	0	1.098612289	0	0	0	0	1.098612289	0	0	0	0	0	1.568615918	1.098612289	1.098612289	1.386294361	6.57144303	6.760182915	6.628041376	0	0	1.098612289
39307_bclustnum_57_kamer_1_number_1	6.477484539	6.461641599	6.526819843	0	0	0	0	0	0	0	0	0	0	0	0	0	0	0	0	0	0	1.504077397	0	1.098612289	0	0	0	0	0	0
3933_bclustnum_662_kamer_1_number_1	0	0	0	0	0	0	2.293452518	2.658348622	2.800598996	6.422975823	7.267644053	7.228874545	0	0	1.098612289	0	0	0	2.197224577	3.395625219	2.854376061	0	0	0	0	0	0	0	0	0
3939_bclustnum_6095_kamer_1_number_1	0	1.533929576	1.098612289	0	0	0	0	0	0	0	0	0	0	0	0	0	0	0	0	0	0	0	0	0	6.609734614	6.704939952	6.682108597	0	0	0
39408_bclustnum_65_kamer_1_number_1	0	0	0	0	0	0	2.351375257	1.871802177	1.609437912	5.976581847	6.8327623	6.418364936	0	0	0	1.609437912	1.540445755	1.098612289	2.197224577	1.252762968	2.1102132	0	1.098612289	1.446918983	0	0	0	0	0	0
3942_bclustnum_109_kamer_1_number_1	0	0	0	0	0	0	0	0	1.098612289	6.020753896	6.98953801	6.982556582	0	0	0	0	0	0	1.098612289	1.098612289	1.098612289	0	0	0	0	0	0	0	0	0
39527_bclustnum_36_kamer_1_number_1	0	0	0	0	0	0	1.098612289	1.609437912	0	6.308906858	6.613980014	6.684195391	6.371991262	6.28101924	6.319368034	0	1.098612289	0	1.098612289	1.609437912	2.197224577	0	0	0	0	0	0	1.299283893	1.880313545	2.036882362
39584_bclustnum_80_kamer_1_number_1	0	1.098612289	0	0	0	0	0	0	0	0	0	0	7.110516515	7.101947763	7.018204824	0	0	0	0	0	0	0	0	0	0	0	0	0	0	0
3958_bclustnum_2595_kamer_1_number_1	0	0	0	0	0	0	0	0	1.098612289	6.648768205	7.124212527	7.123672785	0	0	0	1.098612289	0	0	1.36330461	1.098612289	1.504077397	1.098612289	1.098612289	1.098612289	0	0	0	0	0	0
39596_bclustnum_32_kamer_1_number_1	1.098612289	1.098612289	1.098612289	0	0	0	0	0	0	0	0	0	0	0	0	0	0	0	0	0	0	0	0	0	6.53648433	6.452274481	6.4837631	0	0	0
39790_bclustnum_646_kamer_1_number_1	6.827629235	6.869222329	6.814981879	2.681021529	1.887069649	0	0	0	0	0	0	0	0	0	0	0	0	0	0	0	0	0	0	0	0	0	0	0	0	0
3_bclustnum_1420_kamer_1_number_1	0	0	0	0	0	1.098612289	0	1.098612289	0	6.674140849	6.734294351	6.778459475	2.669212348	2.397895273	2.708050201	0	0	0	1.098612289	0	0	0	0	0	0	0	0	3.449987546	3.285199003	3.844814256
40019_bclustnum_42_kamer_1_number_1	6.906003746	6.74222476	6.795829929	0	0	0	0	0	0	0	0	1.098612289	1.791759469	1.609437912	1.609437912	0	0	0	0	0	0	0	0	0	0	0	0	0	0	0
40104_bclustnum_1580_kamer_5_number_2	7.03966035	6.979768917	7.099474208	0	0	0	0	0	0	0	0	0	0	0	0	0	0	0	0	0	0	0	0	0	0	0	0	0	0	0
40158_bclustnum_36_kamer_1_number_1	0	0	0	6.75256239	6.783608286	6.716594774	0	0	0	0	0	0	1.098612289	0	0	0	0	0	0	0	0	0	0	0	0	0	0	1.098612289	1.098612289	1.098612289
40277_bclustnum_284_kamer_1_number_1	0	0	0	2.610069793	3.194583132	2.494122387	0	0	0	6.076724391	6.640398573	6.682609725	0	1.098612289	1.098612289	1.098612289	1.098612289	0	1.335001067	0	1.098612289	0	0	0	0	0	0	0	0	0
40380_bclustnum_1064_kamer_1_number_1	0	0	0	0	0	0	0	0	0	5.775327642	6.882693848	6.882181028	0	0	0	0	0	0	0	0	0	0	0	0	0	0	0	0	0	0
40468_bclustnum_116_kamer_1_number_1	0	0	0	0	0	0	3.405949406	3.424728344	3.964886766	6.212104968	6.598168371	6.716075268	1.098612289	1.098612289	0	0	1.098612289	1.488076733	0	1.098612289	1.098612289	1.098612289	1.550598322	0	0	0	0	5.294143669	5.448460025	5.73898873
40668_bclustnum_212_kamer_1_number_1	0	0	0	0	0	0	3.749504076	3.874667911	3.757315837	6.693323668	6.98506811	6.999495458	1.098612289	0	1.098612289	2.708050201	2.498702712	3.035827604	3.326233146	3.020424886	3.835860925	0	1.098612289	0	0	0	0	0	0	0
40855_bclustnum_36_kamer_1_number_1	1.098612289	1.098612289	0	0	0	0	0	0	0	0	1.098612289	0	0	0	0	0	1.098612289	0	0	0	0	0	0	0	6.602975877	6.444528634	6.611848812	0	1.098612289	0
40870_bclustnum_947_kamer_7_number_2	0	0	0	0	0	0	5.171296165	5.081404365	5.184190763	6.315358002	6.476312145	6.526913513	1.098612289	0	0	0	0	1.098612289	4.067805496	4.343805422	4.110873864	1.098612289	0	1.098612289	0	0	0	0	0	0
4099_bclustnum_1047_kamer_1_number_1	1.4663363	1.098612289	0	1.4663363	1.098612289	0	0	1.408767439	1.568615918	5.788077666	6.386230961	6.504633922	0	0	0	1.098612289	1.098612289	2.247235161	1.098612289	1.609437912	2.233591864	1.652922599	1.819158984	1.819158984	0	0	0	0	1.098612289	0
41000_bclustnum_368_kamer_1_number_1	1.609437912	1.435084525	1.871802177	6.693048537	6.705367332	6.608900355	0	0	1.098612289	0	0	0	0	0	0	0	0	0	1.098612289	0	0	0	1.098612289	0	0	0	0	0	0	0
4104_bclustnum_582_kamer_1_number_1	0	1.098612289	1.098612289	0	0	0	0	0	0	0	0	0	0	0	0	0	0	0	0	0	1.098612289	1.098612289	0	0	6.971068049	6.938633599	6.950201554	0	0	0
4105_bclustnum_949_kamer_1_number_1	0	0	0	0	1.563976003	1.098612289	0	0	0	6.332982959	6.761958111	6.691876525	0	0	1.098612289	1.897120485	1.540445755	2.430415264	0	0	0	0	0	1.722766598	0	0	0	1.098612289	1.203971804	0
4110_bclustnum_827_kamer_1_number_1	0	0	0	0	0	0	0	1.098612289	1.609437912	6.397762642	6.739336627	6.688354714	5.788941303	5.770403201	5.844509169	0	1.098612289	0	0	0	0	0	1.609437912	1.098612289	0	0	0	4.934473933	5.068904202	5.007296393
41328_bclustnum_83_kamer_1_number_1	1.098612289	1.098612289	0	0	0	0	0	0	0	0	0	1.098612289	0	0	0	1.098612289	1.427117156	1.16315081	0	0	0	0	1.478102963	1.098612289	6.441265469	6.653121061	6.535241271	0	0	0
4142_bclustnum_3699_kamer_1_number_1	0	0	0	0	0	0	1.945910149	2.151762203	1.526056303	6.174479613	7.090351798	7.007401499	6.16658524	6.329720906	6.252759009	2.146581364	1.810108426	2.245426209	1.098612289	0	1.098612289	2.475605192	2.437500527	2.356652735	0	0	0	5.674085863	5.650146086	5.744783653
41477_bclustnum_211_kamer_1_number_1	0	1.098612289	0	6.983586052	7.035954983	6.889183893	0	0	0	0	0	0	0	0	0	0	0	0	0	0	0	0	0	0	0	0	0	0	0	0
414_bclustnum_1786_kamer_1_number_1	6.549650742	6.469637839	6.530148499	1.405341801	0	1.098612289	0	1.098612289	0	2.030169887	1.098612289	0	0	0	0	0	0	0	0	0	0	0	0	1.098612289	0	0	0	0	0	0
41622_bclustnum_114_kamer_1_number_1	0	0	0	0	0	0	1.098612289	1.4663363	0	5.169346985	6.674645984	6.609978425	1.533929576	1.533929576	0	0	0	0	2.144580664	2.069780019	2.501435952	0	0	0	0	0	0	0	0	0
42106_bclustnum_34_kamer_1_number_1	0	0	0	0	0	0	1.098612289	1.098612289	0	6.625754371	7.436322584	7.401536468	0	0	0	0	0	1.098612289	0	0	0	0	1.098612289	0	0	0	0	1.098612289	0	0
42276_bclustnum_393_kamer_1_number_1	6.457162043	6.537777964	6.352049089	0	0	0	0	0	0	0	0	0	0	0	0	0	0	0	0	0	0	0	0	0	0	0	0	0	0	0
42353_bclustnum_296_kamer_1_number_1	0	0	0	0	0	0	0	0	0	6.37331979	7.151485464	7.125283092	0	0	0	0	0	0	0	0	0	0	0	0	0	0	0	0	0	0
4250_bclustnum_6932_kamer_1_number_1	0	0	0	0	0	0	1.791759469	1.871802177	1.504077397	6.820512966	6.240275845	6.29710932	0	0	0	0	0	0	0	0	0	0	0	0	0	0	0	0	0	0
42546_bclustnum_173_kamer_4_number_2	0	0	0	6.588926478	6.612488515	6.574611298	0	0	0	0	0	0	0	0	0	0	0	0	0	0	0	0	0	0	0	0	0	0	0	0
42566_bclustnum_251_kamer_1_number_1	0	0	0	6.50458753	6.473582007	6.401917197	0	0	0	1.349925976	1.887069649	1.815290432	0	0	0	0	0	0	0	0	0	0	0	0	0	0	0	0	0	0
42646_bclustnum_127_kamer_5_number_2	6.989639367	6.993015123	7.021378564	5.801111827	5.848364665	5.747266523	0	0	0	0	0	0	0	0	0	1.098612289	0	0	0	0	1.098612289	0	1.098612289	0	0	0	0	0	0	0
42666_bclustnum_156_kamer_1_number_1	0	0	0	6.860314554	6.758868885	6.801653377	1.098612289	1.871802177	0	0	1.098612289	0	0	0	0	0	0	0	0	0	1.098612289	0	0	0	0	0	0	1.349925976	1.673975809	1.860752118
4284_bclustnum_6828_kamer_1_number_1	6.799799175	6.827268389	6.836975455	0	0	1.098612289	0	0	0	0	0	0	0	0	0	0	0	0	0	0	0	0	0	0	0	0	0	0	0	0
42966_bclustnum_135_kamer_1_number_1	0	1.349925976	1.880313545	0	0	0	0	0	0	0	1.945910149	1.098612289	0	1.098612289	0	0	0	0	0	0	0	0	0	0	6.542471961	6.564137574	6.595507253	0	0	0
42999_bclustnum_116_kamer_88_number_3	0	0	0	3.841600541	3.218875825	4.000033883	4.805659047	4.856706812	4.506454213	6.707269344	6.925005632	6.923431758	0	0	0	1.098612289	0	1.098612289	0	1.945910149	1.4663363	0	1.098612289	1.098612289	0	0	0	0	0	0
42_bclustnum_905_kamer_1_number_1	6.728927611	6.744353607	6.696416773	0	0	0	0	0	0	0	0	0	0	0	0	0	0	0	0	0	0	0	0	0	0	0	0	0	0	0
4319_bclustnum_4612_kamer_1_number_1	0	0	0	6.832912114	6.811122124	6.880155896	0	0	0	0	0	0	0	0	0	0	0	0	0	0	0	0	0	0	0	0	0	0	0	0
43226_bclustnum_172_kamer_1_number_1	0	1.098612289	1.098612289	0	0	0	0	0	0	0	0	0	0	0	0	0	0	1.098612289	0	0	0	1.413693065	1.098612289	0	7.064417089	7.069874128	6.904203981	0	0	0
43322_bclustnum_1011_kamer_1_number_1	6.559615237	6.487684018	6.455512979	0	0	0	5.037880743	5.047102219	5.076067166	6.11966865	6.368677632	6.444660528	0	0	0	0	0	0	3.986334243	4.158883083	3.538887614	0	0	0	0	0	0	0	1.098612289	0
43448_bclustnum_26_kamer_1_number_1	6.497444449	6.49945315	6.549333095	0	0	0	0	0	0	0	0	0	0	0	0	0	0	0	0	0	0	0	0	0	0	0	0	0	0	0
43722_bclustnum_898_kamer_1_number_1	6.131950141	6.294239645	6.34972099	6.664550592	6.667098004	6.601682462	1.098612289	0	0	1.098612289	1.098612289	1.098612289	1.098612289	0	0	0	0	0	1.098612289	0	1.098612289	0	0	0	0	0	0	0	0	0
43779_bclustnum_2687_kamer_24_number_2	6.683861446	6.688354714	6.636733647	0	0	0	0	0	0	0	0	0	0	0	0	0	0	0	0	0	0	0	0	0	0	0	0	0	0	0
43864_bclustnum_1197_kamer_1_number_1	0	0	0	0	0	0	0	0	0	6.587925977	6.891060697	6.847414867	0	0	0	0	0	0	0	0	0	1.098612289	0	1.098612289	0	0	0	0	0	0
438_bclustnum_378_kamer_1_number_1	0	0	0	0	0	0	2.25878262	2.397895273	1.098612289	6.236670915	6.603422008	6.528969102	1.098612289	1.098612289	0	0	0	1.098612289	0	0	0	0	1.098612289	1.945910149	0	0	0	2.66615819	1.791759469	2.833213344
44061_bclustnum_127_kamer_1_number_1	0	0	0	6.522827822	6.40440167	6.501664975	0	0	0	0	0	0	0	0	0	0	0	0	0	1.098612289	0	0	0	0	0	0	0	0	0	0
44078_bclustnum_36_kamer_1_number_1	3.417726684	3.146305132	3.617651945	1.504077397	2.463853241	2.847812143	2.224623552	1.609437912	2.833213344	5.479500776	6.719918542	6.617068698	0	0	0	0	0	0	1.832581464	1.098612289	1.609437912	0	0	0	0	0	0	0	0	0
44107_bclustnum_23_kamer_1_number_1	0	0	0	0	0	0	0	0	0	0	0	0	0	0	0	0	0	0	0	0	0	0	0	0	0	0	0	6.700485077	6.776506992	6.73649235
44132_bclustnum_884_kamer_1_number_1	0	0	0	0	0	0	5.537334267	5.410529357	5.432629704	6.440148774	6.785587645	6.890354764	0	0	0	0	0	0	5.832949357	5.79162545	5.629906271	0	0	0	0	0	0	0	0	1.098612289
44254_bclustnum_125_kamer_1_number_1	1.098612289	0	1.550598322	0	0	0	0	0	0	0	0	0	0	0	0	0	0	0	0	0	0	0	0	0	6.622857327	6.637496535	6.552248224	0	0	0
44289_bclustnum_234_kamer_1_number_1	0	0	0	0	1.098612289	0	3.855452654	4.828313737	4.859812404	6.546785411	7.483806688	7.498315871	6.008813185	6.200509174	5.998936562	1.335001067	0	0	4.94875989	5.117993812	4.369447852	1.609437912	0	1.658228077	0	0	0	5.416100402	5.459585514	5.451038454
44289_bclustnum_4_kamer_1_number_1	0	0	1.098612289	0	0	0	0	0	0	6.084499413	6.916427566	6.981312385	0	0	0	0	0	0	0	0	0	0	0	1.098612289	0	0	0	0	0	0
44311_bclustnum_359_kamer_1_number_1	0	0	0	6.399592773	6.429719478	6.556620673	0	0	0	0	0	0	0	0	0	0	0	0	0	0	0	0	0	0	0	0	0	0	0	0
4445_bclustnum_1357_kamer_1_number_1	0	0	0	0	0	0	0	0	0	0	0	0	1.098612289	0	1.99242971	0	0	0	0	0	0	0	0	0	6.548378116	6.421261227	6.654009469	0	0	0
44956_bclustnum_8_kamer_1_number_1	0	0	0	0	0	0	0	0	0	0	0	0	0	0	0	0	0	0	0	0	0	6.549129863	6.507685092	6.336825731	0	0	0	0	0	0
45342_bclustnum_433_kamer_1_number_1	0	0	0	0	0	0	5.38357721	5.405376439	5.3499606	5.796665469	6.950239891	6.947937069	0	0	0	1.098612289	0	0	5.517452896	5.539693686	5.231108617	1.098612289	1.435084525	0	0	0	0	0	0	0
45415_bclustnum_1649_kamer_1_number_1	0	0	0	0	0	0	4.792479284	5.301093509	4.696727879	6.572903329	6.268886034	6.277688056	0	0	0	0	0	1.098612289	3.518980417	3.503218327	3.426793651	1.098612289	0	0	0	0	0	5.625619111	5.663345823	5.723947781
45445_bclustnum_32_kamer_1_number_1	4.819660405	4.696974226	4.820902341	4.828313737	4.695275937	4.722321911	4.221606971	3.986334243	4.351198803	5.096378645	6.727431725	6.614342149	5.550743954	5.556275786	5.596831806	2.586688269	2.164964207	1.098612289	4.71081766	4.630555242	4.447680939	5.018226409	5.088478662	5.012540145	1.945910149	1.098612289	1.85629799	4.552371549	4.556879747	4.556879747
4579_bclustnum_984_kamer_1_number_1	7.012115294	6.94301624	6.995308176	4.212127598	3.926911618	4.102643365	0	0	0	0	0	0	0	0	0	0	0	0	0	0	0	0	0	0	0	0	0	0	0	0
4582_bclustnum_467_kamer_5_number_3	6.412638949	6.508023703	6.522092798	5.614040099	5.681025488	5.554895694	0	0	0	1.098612289	0	0	0	0	0	0	0	0	0	0	0	0	0	1.098612289	0	0	0	0	0	0
45924_bclustnum_146_kamer_1_number_1	0	0	0	0	0	0	2.341805806	2.197224577	2.564949357	4.719186135	6.594202767	6.569697386	0	0	0	0	1.098612289	0	1.098612289	0	1.098612289	0	0	0	0	0	1.098612289	0	0	0
4609_bclustnum_8915_kamer_1_number_1	0	0	1.098612289	0	0	0	1.609437912	1.673975809	1.098612289	5.983936281	6.740125665	6.662220403	1.241713577	1.098612289	1.098612289	0	0	1.098612289	1.098612289	0	0	0	0	1.098612289	0	0	0	0	0	0
46147_bclustnum_204_kamer_1_number_1	0	1.386294361	0	0	0	0	0	0	0	0	0	0	0	0	0	0	0	0	0	0	0	0	0	0	6.666638676	6.756350825	6.552191146	1.098612289	0	0
46313_bclustnum_70_kamer_1_number_1	0	0	0	0	0	0	4.216562195	4.162003211	4.123903364	6.689847994	6.058655797	5.985949366	0	0	0	4.623010104	5.022563865	4.84103251	4.638604962	5.075173815	4.894101478	4.758749274	4.623010104	4.65396035	0	1.098612289	0	0	0	0
4643_bclustnum_2294_kamer_1_number_1	6.873278734	6.92527098	6.88789231	0	0	0	0	0	0	0	0	0	0	0	0	0	0	0	0	0	0	0	1.098612289	0	0	0	0	0	0	0
46520_bclustnum_141_kamer_1_number_1	0	1.098612289	1.098612289	0	0	0	0	1.098612289	0	6.234410726	6.802024695	6.875748483	2.140066163	2.302585093	2.197224577	1.098612289	1.673975809	1.386294361	1.4663363	0	1.4663363	1.533929576	1.845826164	2.00148	0	0	0	0	0	0
4656_bclustnum_1738_kamer_1_number_1	6.487248612	6.535241271	6.4837631	5.945046193	5.940547498	5.989677952	1.098612289	0	0	0	0	0	0	0	0	0	0	1.609437912	0	0	0	0	0	0	0	0	0	0	0	0
46572_bclustnum_118_kamer_1_number_1	0	0	0	6.820379836	6.656869188	6.725566513	0	0	0	0	0	0	0	0	0	0	0	0	0	0	0	0	0	0	0	0	0	0	0	0
46922_bclustnum_179_kamer_1_number_1	0	0	0	1.098612289	0	0	4.492374319	4.189654742	4.473542124	4.715521228	6.889930355	6.860488604	0	0	0	1.098612289	0	0	0	1.098612289	0	2.671005785	2.895409049	2.772588722	0	0	0	0	0	0
47141_bclustnum_22_kamer_1_number_1	1.098612289	0	0	0	0	0	1.609437912	0	0	6.135564891	6.564419542	6.657497435	5.593357303	6.213941877	5.662012114	1.098612289	2.197224577	1.609437912	1.098612289	0	0	0	1.504077397	1.871802177	0	0	0	4.930870326	5.040194096	5.030437921
47184_bclustnum_293_kamer_1_number_1	7.224753406	7.257284755	7.225772551	5.514234873	5.424950017	5.508489147	1.098612289	1.904238091	0	0	0	1.421386371	0	0	0	0	1.098612289	1.098612289	1.098612289	2.09714147	0	1.098612289	1.098612289	2.014903021	0	0	0	0	0	0
47269_bclustnum_161_kamer_1_number_1	7.016098342	7.047143238	6.911498265	0	0	0	0	0	0	0	0	0	0	0	0	0	0	0	0	0	0	0	0	0	0	0	0	0	0	0
47554_bclustnum_330_kamer_1_number_1	0	0	0	0	0	0	0	0	0	6.257454922	6.528770453	6.478850598	0	1.098612289	1.098612289	0	1.446918983	0	1.098612289	0	1.098612289	1.763588021	0	1.098612289	0	0	0	0	1.098612289	0
47767_bclustnum_4_kamer_1_number_1	0	0	0	0	0	0	5.526778753	5.449608247	5.568344504	6.662707318	6.128324457	5.976350909	1.098612289	0	1.098612289	0	0	0	6.012083018	6.152023933	6.064559328	0	0	0	0	0	0	0	0	0
4795_bclustnum_487_kamer_1_number_1	0	0	0	0	0	0	0	0	0	0	0	0	0	0	0	0	0	0	0	0	0	0	0	0	6.502790046	6.550604508	6.497780518	0	0	0
48193_bclustnum_95_kamer_1_number_1	0	0	0	0	0	0	4.638604962	4.17438727	4.691347882	6.390576181	6.533498098	6.004435065	0	0	0	1.098612289	0	1.098612289	5.006627273	5.003946306	5.132262782	0	0	0	0	0	0	0	0	0
4838_bclustnum_7644_kamer_1_number_1	1.609437912	0	1.098612289	0	1.098612289	0	0	0	0	0	0	0	0	0	0	0	0	0	0	0	0	0	0	0	6.547741912	6.493249931	6.611368766	1.098612289	0	0
4859_bclustnum_691_kamer_1_number_1	0	0	0	0	0	0	0	0	0	6.041900974	6.507852174	6.462548842	2.31677001	2.76361735	2.131627125	0	0	0	1.098612289	0	0	0	0	0	0	0	0	1.421386371	1.488076733	0
488_bclustnum_1174_kamer_1_number_1	0	0	0	0	0	0	0	0	0	0	0	0	0	0	0	5.486455309	4.423211763	5.27094617	0	0	0	6.706128571	6.064250217	6.685361447	0	0	0	0	0	0
4894_bclustnum_819_kamer_1_number_1	6.635216631	6.566047762	6.553775272	0	0	0	0	0	0	0	0	0	0	0	0	0	0	0	0	0	0	0	0	0	0	0	0	1.098612289	0	0
49323_bclustnum_51_kamer_1_number_1	1.540445755	0	1.815290432	0	0	1.098612289	4.012514286	4.156647774	4.221606971	4.626931678	6.989086387	7.011213987	4.515245478	4.478959361	4.80753127	2.16714674	1.369486395	0	5.144775668	5.213124335	4.578826211	4.744932128	4.947816183	4.834693344	0	0	0	4.087175593	4.178773023	4.012514286
494_bclustnum_4009_kamer_1_number_1	0	0	0	0	0	0	0	0	0	0	0	0	0	0	0	2.681021529	3.506556897	3.258096538	0	0	0	6.572903329	6.525192401	6.270988432	0	0	0	0	0	0
4952_bclustnum_344_kamer_1_number_1	0	0	0	0	0	0	1.609437912	1.4663363	1.757857918	6.014529006	6.513230111	6.453100452	1.098612289	1.098612289	2.065455441	0	0	0	1.098612289	1.098612289	1.098612289	0	0	0	0	0	0	0	1.098612289	0
49791_bclustnum_672_kamer_1_number_1	0	0	0	0	0	0	4.902574841	4.897160465	4.97296804	6.44800926	6.505120163	6.605598282	0	0	0	0	0	1.098612289	4.526716632	4.463816277	4.625864572	1.098612289	0	0	0	0	0	3.191845783	3.200939934	3.523087527
49893_bclustnum_244_kamer_1_number_1	0	0	0	0	0	0	1.098612289	1.481604541	0	6.866080838	7.807436839	7.846945798	0	0	0	1.609437912	1.098612289	1.098612289	2.720097342	1.89256362	2.606054389	1.609437912	1.098612289	1.652922599	0	0	0	2.128231706	2.32238772	1.098612289
49974_bclustnum_13_kamer_1_number_1	0	0	0	0	0	0	0	0	0	4.752356672	6.744731516	6.611273267	4.492374319	4.529009185	4.615120517	0	0	0	0	0	0	2.822461633	2.414287457	2.934824487	0	0	0	0	1.098612289	1.098612289
5027_bclustnum_2461_kamer_1_number_1	1.098612289	0	1.098612289	0	0	0	0	0	0	0	0	0	0	0	0	0	0	0	0	0	0	0	0	0	6.586477815	6.653185558	6.588926478	0	0	0
50299_bclustnum_157_kamer_1_number_1	6.605297921	6.516932448	6.693323668	1.098612289	1.098612289	0	3.663561646	3.621670704	3.839452313	1.098612289	1.098612289	0	1.609437912	1.098612289	0	0	0	0	0	0	1.098612289	1.098612289	0	0	0	0	0	2.047692843	2.047692843	2.065455441
50396_bclustnum_45_kamer_1_number_1	0	1.609437912	1.098612289	2.054123734	2.079441542	2.120263136	0	0	0	0	0	0	0	0	0	0	0	0	0	0	0	0	0	0	6.509886247	6.316160573	6.420808929	0	0	0
5043_bclustnum_548_kamer_1_number_1	0	0	0	6.403574198	6.392873105	6.521461717	0	0	0	0	0	0	0	0	0	0	0	0	0	0	0	0	0	0	0	0	0	0	0	0
50646_bclustnum_3_kamer_1_number_1	1.4663363	1.098612289	1.098612289	0	0	0	0	0	0	0	0	0	0	0	0	0	0	0	0	0	0	0	0	0	6.968219888	6.913737351	7.013312775	0	0	0
5095_bclustnum_143_kamer_1_number_1	6.979871268	7.003774298	7.005789019	0	0	0	0	0	0	0	0	0	1.098612289	0	0	0	0	0	0	0	0	0	0	0	0	0	0	0	0	0
509_bclustnum_6858_kamer_1_number_1	1.098612289	1.098612289	1.880313545	1.098612289	0	0	0	1.516348465	1.098612289	2.646961722	2.448536536	1.550598322	1.098612289	1.913649615	0	1.098612289	0	0	2.291411905	1.845826164	1.098612289	1.35812377	0	1.098612289	6.759384033	6.77928989	6.735648177	1.098612289	1.098612289	0
51032_bclustnum_154_kamer_1_number_1	0	0	0	0	0	0	0	0	0	5.446737372	6.933910236	6.135564891	1.098612289	1.098612289	1.609437912	0	0	0	0	0	0	0	0	0	0	0	0	0	0	0
51193_bclustnum_100_kamer_1_number_1	7.068384925	7.045558783	7.031962082	6.362165663	6.297569619	6.28785856	0	0	0	0	0	0	0	0	0	0	0	0	0	0	0	0	0	0	0	0	0	0	0	0
51342_bclustnum_96_kamer_1_number_1	1.098612289	0	0	0	0	0	2.197224577	1.098612289	1.098612289	6.142467421	6.706128571	6.717562828	1.098612289	0	0	0	0	1.098612289	1.568615918	2.028148247	1.845826164	0	1.098612289	0	0	0	0	0	1.098612289	0
5146_bclustnum_3269_kamer_7_number_2	0	0	1.098612289	0	0	0	0	0	0	0	0	0	0	0	0	0	0	0	0	0	0	0	0	0	6.505185974	6.456769656	6.463653287	0	0	0
51611_bclustnum_53_kamer_1_number_1	0	0	0	6.676382964	6.688354714	6.643065513	0	0	0	1.098612289	0	0	0	0	0	0	0	0	0	0	0	0	0	0	0	0	0	0	0	0
51678_bclustnum_52_kamer_1_number_1	6.70889816	6.662707318	6.675823222	0	0	0	0	1.098612289	0	0	0	0	0	0	0	0	0	0	0	0	0	0	0	0	0	0	0	0	0	0
51684_bclustnum_94_kamer_1_number_1	3.802614307	3.814710021	3.48542823	6.608000625	6.503879407	6.506870167	0	0	1.098612289	0	0	0	0	0	0	0	0	0	0	0	0	0	0	0	0	0	0	0	0	0
51993_bclustnum_46_kamer_1_number_1	6.678593655	6.598236512	6.704414355	0	0	0	0	0	0	1.098612289	0	0	0	0	0	0	0	0	0	0	0	1.098612289	0	1.098612289	0	0	0	0	0	0
519_bclustnum_2228_kamer_2_number_2	0	0	0	0	0	0	0	0	0	6.672032945	5.792251123	5.777652323	0	0	0	0	0	0	0	0	0	0	0	0	0	0	0	0	0	0
52453_bclustnum_77_kamer_1_number_1	1.098612289	0	0	0	0	0	0	0	0	1.609437912	0	0	0	0	0	0	0	0	0	0	0	0	0	0	6.967306384	7.017909287	6.948638072	0	0	0
52461_bclustnum_94_kamer_1_number_1	6.939835172	6.947937069	6.996498489	0	0	1.098612289	0	1.098612289	0	0	0	0	0	0	0	0	0	0	0	0	0	0	0	0	0	0	0	0	0	0
52678_bclustnum_248_kamer_1_number_1	1.098612289	1.098612289	1.563976003	0	0	0	0	0	1.098612289	1.686398954	0	0	2.104134154	1.098612289	1.845826164	0	0	0	0	1.098612289	0	0	0	0	6.942011768	7.037905963	7.045576208	0	0	0
52774_bclustnum_27_kamer_1_number_1	6.733996953	6.548577205	6.576121319	0	0	0	0	0	0	0	0	0	0	0	0	0	0	0	0	0	0	0	0	0	0	0	0	0	0	0
52776_bclustnum_173_kamer_1_number_1	1.652922599	1.609437912	1.098612289	0	0	0	4.666011255	4.803274865	4.754374366	6.014160045	6.696023861	6.488619654	2.944438979	3.218875825	3.512902726	0	1.752538623	1.35812377	5.826454282	5.83996992	5.717787281	2.501435952	2.923161581	2.619386551	0	0	0	3.186352633	3.025291076	2.912350665
531_bclustnum_2294_kamer_1_number_1	6.789346673	6.79215698	6.779163666	0	0	0	0	0	0	0	0	0	0	0	0	0	0	0	0	0	0	0	0	0	0	0	0	0	0	0
53301_bclustnum_139_kamer_1_number_1	1.349925976	1.098612289	1.488076733	0	0	0	0	0	0	0	0	0	0	0	0	0	0	0	0	0	0	0	0	0	6.698268054	6.707386649	6.681929383	0	1.098612289	0
5335_bclustnum_2544_kamer_1_number_1	0	0	0	0	0	0	0	0	0	6.999650544	6.694030977	6.796823718	0	1.098612289	0	0	0	0	0	0	0	0	0	0	0	0	0	5.398162702	5.204616391	5.299980982
5344_bclustnum_327_kamer_1_number_1	1.478102963	1.609437912	1.435084525	0	0	1.098612289	1.098612289	0	0	1.526056303	0	0	0	0	1.098612289	1.335001067	1.098612289	1.098612289	1.098612289	0	0	1.098612289	1.098612289	1.280933845	7.307202315	7.287403309	7.328030179	0	0	1.098612289
5347_bclustnum_92_kamer_4_number_2	6.775855697	6.793626434	6.746075997	0	0	0	0	0	0	0	0	0	0	0	0	0	0	0	0	0	0	0	0	0	0	0	0	0	0	0
535_bclustnum_3559_kamer_1_number_1	6.391917113	6.371122839	6.554949981	1.421386371	1.481604541	1.098612289	0	0	0	0	0	0	0	0	0	0	0	0	0	0	0	0	0	0	0	0	0	0	0	0
53620_bclustnum_329_kamer_1_number_1	0	0	0	0	0	0	0	0	0	6.589123157	6.587353026	6.572282543	4.411585437	3.79854967	4.262679877	1.386294361	1.945910149	1.76766143	1.098612289	0	0	0	0	1.098612289	0	0	0	0	0	0
53645_bclustnum_94_kamer_1_number_1	6.72982407	6.761341261	6.794362592	1.568615918	1.098612289	1.098612289	0	0	0	2.63905733	3.135494216	2.708050201	0	0	0	1.757857918	1.504077397	1.945910149	0	0	0	0	1.887069649	1.098612289	0	0	0	0	0	1.098612289
5377_bclustnum_926_kamer_1_number_1	0	0	0	6.789196943	6.752270376	6.70073111	0	0	0	0	0	0	0	0	0	0	0	0	0	0	0	0	0	0	0	0	0	0	0	0
53815_bclustnum_573_kamer_1_number_1	0	0	0	6.634633358	6.624065228	6.724072797	0	0	0	0	0	0	0	0	0	0	0	0	0	0	0	0	0	0	0	0	0	0	0	0
53946_bclustnum_14_kamer_1_number_1	0	0	0	0	0	0	0	0	0	6.731614581	6.201666719	6.021629961	0	1.098612289	1.098612289	0	1.558144618	0	0	0	0	0	1.098612289	1.098612289	0	0	0	0	0	0
5395_bclustnum_905_kamer_3_number_3	6.715383386	6.652863029	6.59441346	0	0	0	0	0	0	0	0	0	0	0	0	0	0	0	0	0	0	0	0	0	0	0	0	0	0	0
53990_bclustnum_18_kamer_1_number_1	0	0	0	0	0	0	2.876385516	2.772588722	2.730026934	2.505525937	3.17805383	2.708050201	0	0	0	6.802394763	6.803505258	6.804060043	2.302585093	1.845826164	2.656756907	6.82437367	6.809315206	6.891117638	0	0	0	0	0	0
5422_bclustnum_1426_kamer_1_number_1	0	0	0	6.81770912	6.791845987	6.840309068	0	0	0	0	0	0	0	0	0	0	0	0	0	0	0	1.609437912	1.098612289	1.098612289	0	0	0	0	0	0
54347_bclustnum_227_kamer_1_number_1	1.098612289	1.717651753	1.717651753	1.098612289	0	1.098612289	0	0	0	0	0	0	0	0	0	0	0	0	0	0	0	0	0	0	6.704720681	6.692703898	6.746118313	0	0	0
54359_bclustnum_508_kamer_1_number_1	6.607264862	6.455627717	6.622373226	5.205834686	5.257495372	5.028259079	0	0	0	0	0	0	0	0	0	0	0	0	0	0	0	0	0	0	0	0	0	0	0	0
54380_bclustnum_16_kamer_1_number_1	6.764526735	6.707812985	6.686138062	0	0	0	0	1.098612289	0	0	0	0	0	0	0	0	0	0	0	0	0	0	0	0	0	0	0	0	0	0
54483_bclustnum_37_kamer_1_number_1	0	0	0	0	1.098612289	0	4.137830206	3.753418757	3.743149813	4.484884396	6.856988162	6.803874779	4.818933884	4.598480862	4.719988832	1.098612289	0	1.098612289	1.92368645	1.568615918	2.50395736	1.098612289	0	1.098612289	0	0	0	0	0	1.098612289
54637_bclustnum_401_kamer_1_number_1	0	0	0	1.098612289	0	0	0	0	0	6.227903324	7.057699983	7.024310895	1.098612289	0	1.098612289	0	1.098612289	0	1.609437912	1.098612289	1.819158984	1.098612289	1.098612289	1.533929576	0	0	0	0	0	0
54637_bclustnum_45_kamer_1_number_1	0	0	0	0	0	0	0	0	0	6.565466358	7.199461743	7.132154042	0	0	0	0	1.098612289	0	0	0	0	0	1.550598322	0	0	0	0	0	0	0
546_bclustnum_4081_kamer_1_number_1	6.473669993	6.620645043	6.634257466	4.919980926	5.078293943	5.159055299	0	0	0	0	0	0	0	0	0	0	0	0	0	0	0	0	0	0	0	0	0	0	0	0
54925_bclustnum_81_kamer_1_number_1	0	0	0	0	0	0	3.232119736	3.569532696	3.578877629	5.793717629	6.508310015	6.504172897	0	0	0	4.005057871	4.213977737	3.979681654	5.146039931	5.05465218	5.101894857	3.839452313	4.262679877	4.276666119	0	0	0	4.585751865	4.69287882	4.674388365
55329_bclustnum_185_kamer_1_number_1	0	0	0	0	0	0	3.518307598	3.275426276	3.462891236	4.448516376	6.826183987	6.71699784	4.667722361	4.541519804	4.515918119	0	1.609437912	1.098612289	2.908719078	2.382627493	2.442347035	4.249792971	4.482488296	4.196517503	4.432138544	4.501043353	4.405363451	4.108686227	3.991626848	4.132495793
55652_bclustnum_503_kamer_1_number_1	6.021244199	5.968241978	5.921090365	6.66845948	6.584414249	6.647452289	1.098612289	0	1.098612289	0	1.098612289	0	0	0	0	0	0	0	0	0	0	0	0	0	0	0	1.098612289	4.621043535	4.644390899	4.903792198
5575_bclustnum_884_kamer_1_number_1	0	0	0	0	0	0	0	0	0	6.827629235	7.302314466	7.303782658	0	0	0	1.745238977	1.806797496	2.564949357	1.996554376	1.919592574	1.558144618	1.4663363	1.098612289	1.945910149	0	0	0	0	0	1.098612289
55883_bclustnum_105_kamer_1_number_1	1.098612289	0	0	0	0	0	0	0	0	0	0	0	0	0	0	0	0	1.098612289	1.098612289	0	0	0	0	1.098612289	6.618146017	6.498449304	6.499119148	0	0	0
5597_bclustnum_891_kamer_2_number_2	0	1.098612289	0	6.688354714	6.675543233	6.691946016	0	0	0	0	1.098612289	0	0	0	0	0	0	0	0	0	0	0	0	0	0	0	0	0	0	0
5598_bclustnum_107_kamer_1_number_1	0	0	0	6.712956201	6.63778214	6.704169227	0	0	0	0	0	0	0	0	0	0	0	0	0	0	0	0	0	0	0	0	0	0	0	0
56043_bclustnum_86_kamer_1_number_1	6.660148682	6.640529215	6.680854679	0	0	0	0	0	0	0	0	0	0	0	0	0	1.098612289	0	0	0	0	0	0	0	0	0	0	0	0	0
5609_bclustnum_86_kamer_1_number_1	6.628041376	6.535966697	6.582371339	0	0	0	0	0	0	0	0	0	0	0	0	0	0	0	0	0	0	0	0	0	0	0	0	0	0	0
56370_bclustnum_65_kamer_1_number_1	0	0	0	0	0	0	6.644440563	6.732607529	6.65586883	1.481604541	1.32175584	1.252762968	0	0	0	0	0	0	4.562610224	4.530805412	4.725908849	0	0	0	0	0	0	0	0	0
563_bclustnum_6015_kamer_1_number_1	6.548696066	6.601682462	6.493417929	1.098612289	0	1.609437912	0	0	0	1.098612289	0	0	0	1.098612289	1.098612289	0	0	0	0	0	0	0	1.098612289	1.098612289	3.397487174	3.397487174	3.32822876	0	0	0
5662_bclustnum_199_kamer_2_number_2	0	0	0	6.52473636	6.339653587	6.4492058	0	0	0	0	0	0	0	0	0	0	0	0	0	0	0	0	0	0	0	0	0	0	0	0
5689_bclustnum_15_kamer_1_number_1	0	0	0	0	0	0	0	0	0	5.583913515	6.967381756	6.980280571	0	0	0	0	0	0	0	0	0	0	0	0	0	0	0	0	0	0
5712_bclustnum_422_kamer_1_number_1	1.098612289	1.945910149	0	0	0	0	0	0	0	0	0	0	1.098612289	0	0	0	0	0	0	0	0	0	0	0	6.893318569	6.91671502	6.959607417	0	0	0
57170_bclustnum_154_kamer_1_number_1	0	0	0	1.098612289	0	0	0	0	1.098612289	6.498533624	6.951456325	6.877123892	1.098612289	1.098612289	0	0	1.098612289	1.098612289	1.098612289	1.098612289	0	0	1.098612289	1.533929576	0	0	0	0	0	1.098612289
5754_bclustnum_630_kamer_18_number_3	6.87488802	6.91274282	6.905753276	0	0	0	0	0	0	0	0	0	0	0	0	0	0	0	0	0	0	0	0	0	0	0	0	0	0	0
57561_bclustnum_37_kamer_1_number_1	6.594804628	6.642859613	6.744059186	0	0	0	0	0	0	0	0	0	0	0	0	0	0	0	0	0	0	0	0	0	2.172223528	2.219203484	2.63905733	0	0	0
57647_bclustnum_229_kamer_1_number_1	1.098612289	0	1.609437912	1.609437912	0	0	4.23732162	4.217872546	4.23732162	6.66596648	6.89015734	6.765038977	0	1.609437912	0	3.555348061	2.990161787	3.567965272	4.453054601	4.399920579	4.383414421	4.248495242	4.382026635	4.317488114	0	0	0	2.302585093	1.945910149	1.540445755
5784_bclustnum_4614_kamer_1_number_1	6.573807254	6.554838977	6.549129863	3.171083762	3.360375387	3.173413916	0	0	0	0	0	0	0	0	0	0	0	0	0	0	0	0	0	0	0	0	0	0	0	0
5802_bclustnum_142_kamer_1_number_1	6.585251231	6.383506635	6.572748169	4.014579594	3.779633817	3.506556897	0	0	0	0	0	0	0	0	0	0	1.098612289	0	0	0	0	0	0	0	0	0	0	0	0	0
58125_bclustnum_136_kamer_1_number_1	7.070537174	6.966552349	7.059901093	0	0	0	0	0	0	0	0	0	0	0	0	0	0	0	0	0	0	0	0	0	0	0	0	0	0	0
5816_bclustnum_646_kamer_1_number_1	0	1.098612289	0	6.43775165	6.471314851	6.505120163	0	0	0	0	0	0	0	0	0	0	0	0	0	0	0	0	0	0	0	0	0	0	0	0
58193_bclustnum_29_kamer_1_number_1	0	0	0	0	0	0	0	0	0	0	0	0	0	0	0	0	0	0	0	0	0	7.128896828	7.031149211	6.862234764	0	0	0	0	0	0
58195_bclustnum_29_kamer_8_number_2	0	0	0	6.929839615	6.908754779	6.936342736	0	0	0	0	0	0	0	0	0	0	0	0	0	0	0	0	0	0	0	0	0	0	0	0
58248_bclustnum_205_kamer_1_number_1	6.73115055	6.660062855	6.79433795	1.098612289	0	0	0	0	0	4.670957927	4.275402821	4.259545392	1.098612289	0	0	0	1.098612289	0	1.098612289	1.686398954	1.550598322	0	0	0	1.35812377	1.609437912	1.098612289	0	0	1.098612289
58277_bclustnum_23_kamer_1_number_1	6.442540166	6.425679069	6.41468771	6.659151602	6.578170072	6.534596651	0	0	0	0	0	0	0	0	0	0	0	0	0	0	0	0	0	0	0	0	0	0	0	0
5829_bclustnum_619_kamer_1_number_1	1.098612289	0	0	0	0	0	2.525728644	3.277144733	3.32323584	3.640505578	4.106767082	3.946424432	1.098612289	1.098612289	1.098612289	8.142499742	8.043200818	8.088835026	2.944438979	3.228826156	2.656756907	8.07750924	8.021847138	8.055411668	0	0	0	0	1.4663363	1.488076733
58458_bclustnum_51_kamer_1_number_1	0	0	0	0	0	0	4.934473933	4.887608534	4.807743616	6.583912553	5.572845808	5.551900885	2.047692843	1.558144618	1.280933845	1.098612289	2.477302814	2.044755631	2.843850684	2.274933281	2.477302814	1.35812377	2.061422673	1.904238091	0	0	0	0	0	1.098612289
58459_bclustnum_31_kamer_1_number_1	0	1.098612289	0	0	1.098612289	0	0	0	1.098612289	5.773930235	6.717320902	6.576190979	0	0	0	4.106179255	4.208947733	4.101462503	1.098612289	0	0	4.950786205	5.028566891	5.374352053	0	0	0	0	0	0
5849_bclustnum_761_kamer_1_number_1	0	0	0	0	0	0	3.931825633	4.007333185	4.119037175	6.753904554	6.90047887	6.79933453	0	1.098612289	0	0	0	0	3.64414356	3.855452654	3.737669618	0	0	0	0	0	0	0	0	1.098612289
587_bclustnum_3113_kamer_1_number_1	0	0	1.098612289	0	0	0	0	0	0	1.098612289	1.609437912	0	1.945910149	1.945910149	1.945910149	0	0	0	0	0	0	0	0	0	6.834723189	6.729482316	6.817361096	0	0	0
5906_bclustnum_4981_kamer_1_number_1	0	0	0	1.098612289	0	0	1.098612289	1.098612289	1.098612289	6.656375563	7.130810826	7.055123007	0	0	0	0	0	0	3.774400972	3.561676566	3.195754577	0	0	0	2.475605192	2.662585501	2.172223528	0	0	0
59117_bclustnum_281_kamer_1_number_1	1.098612289	0	1.098612289	0	1.098612289	0	3.854864121	4.177459469	4.046941935	5.917818007	7.002155954	6.897471583	5.063651437	5.104077063	5.176149733	4.793241846	4.110873864	4.022796644	5.531561732	5.65248918	5.345520558	4.753590191	4.844187086	4.611152258	1.098612289	0	0	3.996364154	4.237000863	4.077537444
59133_bclustnum_41_kamer_1_number_1	0	0	0	0	0	0	0	0	0	6.589231795	5.850603501	6.019133215	0	0	1.098612289	0	1.098612289	1.098612289	0	1.098612289	0	0	0	0	0	0	0	0	0	0
59191_bclustnum_745_kamer_1_number_1	6.708433229	6.616829284	6.689421393	0	0	0	0	0	0	0	0	0	0	0	0	0	0	0	0	0	0	0	0	0	0	0	0	0	0	0
59292_bclustnum_15_kamer_1_number_1	6.566984617	6.650279049	6.596539788	1.098612289	1.178654996	1.32175584	1.791759469	1.098612289	1.609437912	0	0	0	0	1.098612289	0	1.098612289	0	1.098612289	1.386294361	1.558144618	1.749199855	1.098612289	1.098612289	0	0	0	0	0	0	0
59376_bclustnum_39_kamer_1_number_1	1.824549292	1.815290432	2.093234727	0	0	0	4.564348191	4.783316371	4.560870276	5.980572948	6.965240862	6.997294292	0	0	1.098612289	0	0	0	5.44745694	5.207664823	5.249652195	1.516348465	1.526056303	1.568615918	0	0	0	1.098612289	0	0
59563_bclustnum_27_kamer_1_number_1	0	0	0	0	0	0	4.607168189	4.844187086	4.821893169	6.274008442	7.055312843	6.710174693	0	0	0	0	0	0	1.945910149	1.609437912	0	0	0	0	0	0	0	0	0	0
5962_bclustnum_8691_kamer_1_number_1	1.299283893	1.558144618	0	5.083179187	5.05987615	5.138318788	0	0	0	0	0	0	0	0	0	0	0	0	0	0	0	0	0	0	6.45099635	6.504038142	6.466144724	0	0	0
59631_bclustnum_154_kamer_1_number_1	1.098612289	1.098612289	1.550598322	0	0	0	0	0	0	0	0	0	0	0	0	0	0	0	0	0	0	0	0	0	6.812345094	6.845997953	6.801036063	0	0	0
59876_bclustnum_2_kamer_1_number_1	0	0	0	0	0	0	0	0	0	0	0	0	7.207859871	7.271933007	7.228388452	0	0	0	0	0	0	0	0	0	0	0	0	0	0	0
60189_bclustnum_193_kamer_1_number_1	0	0	0	0	0	0	0	0	0	0	0	0	0	0	0	0	0	0	0	0	0	1.098612289	0	0	6.519638318	6.405889397	6.709982159	0	0	0
60424_bclustnum_27_kamer_1_number_1	0	0	0	1.098612289	0	0	0	0	0	5.597187864	7.003165454	6.918259912	1.860752118	2.09714147	2.423536438	0	0	0	1.516348465	1.098612289	1.098612289	0	0	0	0	0	0	1.098612289	0	0
6070_bclustnum_868_kamer_1_number_1	0	0	0	0	0	0	5.311973693	5.288898145	5.252273428	6.212606096	6.988643783	6.948177193	6.02797727	5.926926026	5.936546269	5.563082593	4.687901584	5.018934097	5.809267983	5.855787998	5.932576697	5.924589966	5.897153868	5.899212187	0	0	0	0	1.098612289	1.098612289
6094_bclustnum_931_kamer_1_number_1	0	0	0	5.51515709	5.347788251	5.43122544	4.787491743	4.834693344	4.69501089	5.853925133	6.475124503	6.552824527	5.593223284	5.567580853	5.631928371	1.749199855	2.047692843	2.224623552	4.823944205	5.150136333	5.081404365	1.824549292	1.791759469	1.550598322	0	0	0	3.063390922	2.549445171	2.944438979
60_bclustnum_637_kamer_1_number_1	0	1.315676062	0	0	0	0	4.110873864	3.398162782	3.906554078	4.472019292	6.37024339	6.628143223	4.593281798	4.909303689	4.922634337	1.098612289	1.098612289	1.098612289	1.098612289	1.575535671	1.887069649	3.782121588	4.034921822	3.876866183	0	0	0	4.049409956	3.713572067	4.324735124
61069_bclustnum_527_kamer_1_number_1	0	0	0	0	0	0	3.598834389	3.713572067	3.663561646	6.883052666	6.6061095	6.749019772	0	0	1.098612289	1.098612289	1.098612289	1.35812377	5.314298978	5.421026029	5.202175341	1.098612289	1.609437912	1.098612289	0	0	0	0	0	0
6112_bclustnum_1380_kamer_1_number_1	6.748290504	6.572282543	6.229003979	0	0	0	1.098612289	1.098612289	1.098612289	0	0	0	0	0	0	0	0	0	0	0	0	0	0	0	0	0	0	0	0	0
61393_bclustnum_260_kamer_3_number_2	6.377293114	6.554883095	6.503289172	0	0	0	0	0	0	0	0	0	0	0	0	0	0	0	0	0	0	0	0	0	0	0	0	0	0	0
6147_bclustnum_4899_kamer_1_number_1	0	0	0	0	0	0	0	0	0	6.318247133	6.651313442	6.557630266	5.891005887	5.812293024	5.909543827	0	0	0	0	0	1.098612289	0	1.098612289	0	0	0	0	0	0	1.098612289
61550_bclustnum_144_kamer_1_number_1	0	0	0	0	0	0	3.496507561	3.744141488	3.826663354	4.125893293	6.595045271	6.639875834	4.837003868	4.776531903	4.999055169	2.089010612	1.609437912	2.478477695	3.750409548	2.397895273	3.278596509	4.618165381	4.532599493	4.638256739	0	0	0	3.4042228	3.668212353	3.879181581
61563_bclustnum_101_kamer_1_number_1	1.098612289	1.098612289	1.098612289	0	0	0	0	0	0	0	0	1.098612289	0	0	0	0	0	0	0	1.098612289	1.098612289	0	0	0	6.642323815	6.612712852	6.81297306	0	0	0
6156_bclustnum_4257_kamer_1_number_1	0	0	0	0	0	0	0	0	0	6.329446358	6.876582415	6.881015948	0	0	0	0	0	0	0	1.098612289	1.098612289	0	0	0	0	0	0	0	0	0
61639_bclustnum_46_kamer_1_number_1	0	0	0	6.722973899	6.67148976	6.610311045	0	0	0	0	0	0	0	0	0	0	0	0	0	0	0	0	0	0	0	0	0	0	0	0
61930_bclustnum_636_kamer_1_number_1	0	0	0	0	0	0	5.217264566	5.231108617	5.182586599	6.865592803	7.013276782	7.038906341	6.317938755	6.312253731	6.353872526	5.427462278	5.041578251	5.271531815	5.633256285	5.604223615	5.771441123	4.917891153	4.986540669	5.000106729	0	1.098612289	0	5.466852661	5.490708884	5.547962625
6245_bclustnum_62_kamer_1_number_1	0	0	0	0	0	0	4.384907481	4.748941471	4.624217626	5.958822547	6.557760828	6.707332886	0	0	0	0	0	1.098612289	4.497241932	4.954198972	4.771336954	1.098612289	0	1.4663363	0	0	0	4.007333185	3.879181581	3.453644344
626_bclustnum_1898_kamer_1_number_1	0	0	0	0	0	0	2.944438979	3.117949906	2.492453104	6.045005314	6.548014211	6.473669993	0	0	1.609437912	0	0	0	1.098612289	0	0	1.098612289	0	0	0	0	0	0	1.098612289	0
62768_bclustnum_142_kamer_1_number_1	0	0	0	0	0	0	1.098612289	1.098612289	0	6.183024548	6.9195455	6.879502913	0	0	0	0	0	0	0	0	1.098612289	0	0	0	3.784189634	3.786711451	3.761200116	0	0	0
62839_bclustnum_4_kamer_1_number_1	2.068012731	1.609437912	0	0	0	0	0	0	0	0	0	0	0	0	0	0	0	0	0	0	0	0	0	0	7.138652691	7.109805931	7.090759936	0	0	1.098612289
6301_bclustnum_3377_kamer_1_number_1	6.65544035	6.68669331	6.70889816	3.496507561	3.008154794	3.540959324	0	0	0	0	0	0	4.212127598	4.08176578	3.984343667	0	1.098612289	0	0	0	1.446918983	0	0	0	0	0	0	0	0	0
63571_bclustnum_102_kamer_1_number_1	6.81563999	6.810877571	6.838048224	6.121029019	6.048947769	6.097325687	0	0	0	0	0	0	0	0	0	1.098612289	1.488076733	0	0	0	0	1.4663363	1.098612289	1.32175584	0	0	0	0	0	0
63779_bclustnum_49_kamer_1_number_1	1.098612289	1.098612289	1.098612289	0	0	0	0	0	0	0	0	0	0	0	0	0	0	0	0	0	0	0	0	0	7.038880028	7.012619672	7.090543394	0	0	0
6390_bclustnum_45_kamer_1_number_1	6.49375384	6.3265966	6.51935818	0	1.098612289	1.098612289	0	0	0	0	1.897120485	1.540445755	0	0	0	1.098612289	0	0	0	0	0	1.4663363	0	1.734601644	0	0	0	0	0	1.540445755
6399_bclustnum_2714_kamer_1_number_1	6.629656473	6.593196577	6.601380923	0	0	0	0	0	0	0	0	0	0	0	0	0	0	0	0	0	0	0	0	0	0	0	0	0	0	0
6408_bclustnum_176_kamer_1_number_1	0	0	0	0	0	0	3.854393893	4.094344562	3.728100167	6.789096735	6.863803391	6.885623161	0	1.098612289	1.098612289	1.098612289	0	1.652922599	0	0	1.335001067	1.098612289	0	1.098612289	0	0	0	0	0	0
6417_bclustnum_2732_kamer_1_number_1	1.648658626	1.098612289	1.098612289	0	0	0	0	0	0	0	0	0	2.397895273	2.590264665	2.63905733	0	0	0	0	0	0	0	0	0	6.721907512	6.740282925	6.74476565	0	0	0
64514_bclustnum_9_kamer_1_number_1	0	0	1.098612289	0	0	1.098612289	3.198673118	3.592734676	3.184975653	4.916324615	6.649632009	6.596235329	4.262679877	4.483002552	4.48863637	3.289643654	2.251291799	3.106078838	4.066173114	3.439350217	3.384390263	3.992066328	4.028324055	3.171083762	1.435084525	1.098612289	1.098612289	3.545779572	3.496507561	3.390025205
6465_bclustnum_819_kamer_1_number_1	6.701608953	6.754103974	6.679778818	1.609437912	1.609437912	1.098612289	0	0	0	0	0	0	0	0	0	0	0	0	0	0	0	0	0	0	0	0	0	0	0	0
64772_bclustnum_198_kamer_12_number_2	6.563855527	6.617848066	6.661001435	0	0	0	0	0	0	0	0	0	0	0	0	0	0	0	0	0	0	0	0	0	0	0	0	0	0	0
6516_bclustnum_3_kamer_1_number_1	1.609437912	0	1.609437912	1.526056303	1.098612289	0	6.86738006	6.790739324	6.892979655	6.621110002	7.046647278	7.132609366	0	0	0	0	1.098612289	0	6.758094504	6.780300245	6.796451582	0	1.098612289	1.098612289	0	1.098612289	0	0	0	1.098612289
651_bclustnum_592_kamer_1_number_1	6.752737557	6.75413779	6.760878083	0	0	1.098612289	0	0	0	0	0	0	0	0	0	1.189582763	1.098612289	1.386294361	0	0	0	0	1.435084525	1.488076733	0	0	0	0	0	0
65249_bclustnum_28_kamer_1_number_1	2.475605192	1.977162385	2.25878262	0	0	0	0	1.098612289	0	1.098612289	1.098612289	2.007467445	1.098612289	1.845826164	1.563976003	1.098612289	0	1.098612289	2.356652735	0	1.773067525	0	1.098612289	0	6.891513086	6.937207279	6.922427119	0	0	0
65459_bclustnum_110_kamer_1_number_1	1.098612289	0	0	0	0	0	5.505331536	5.476463552	5.573104151	6.909952863	8.09047891	8.053171634	6.394008727	6.471573198	6.446513155	4.621702767	4.552472748	4.371255079	7.365812837	7.250635512	7.05725229	5.558016544	5.553734478	6.01980902	0	1.098612289	0	5.292047754	5.263984687	5.339939041
66075_bclustnum_89_kamer_1_number_1	0	0	0	0	1.098612289	1.098612289	1.098612289	0	0	5.534377143	6.540549364	6.541992018	0	1.098612289	1.098612289	0	0	0	0	0	1.098612289	0	1.098612289	0	0	0	0	0	0	0
66217_bclustnum_148_kamer_1_number_1	0	0	0	0	0	1.098612289	0	1.563976003	0	6.168913837	6.542712566	6.49878353	1.098612289	0	0	0	0	0	0	0	0	0	0	0	1.098612289	1.098612289	0	0	0	0
66218_bclustnum_374_kamer_1_number_1	6.928145969	6.894264689	6.897098699	0	0	0	0	0	0	0	1.098612289	1.098612289	0	0	0	0	0	0	0	0	0	0	0	0	0	0	0	0	0	0
6622_bclustnum_183_kamer_1_number_1	0	1.098612289	1.609437912	1.098612289	0	0	4.679043131	4.626060457	4.366278278	6.492377704	7.156434015	7.244227516	1.098612289	1.098612289	1.098612289	0	0	0	1.386294361	0	1.098612289	1.098612289	0	1.349925976	0	0	0	1.098612289	0	0
66389_bclustnum_749_kamer_16_number_2	0	0	0	1.098612289	0	0	0	0	0	0	0	0	0	0	0	0	0	0	0	0	0	0	0	0	6.737983049	6.798099998	6.766356448	0	0	0
66404_bclustnum_43_kamer_1_number_1	0	0	0	0	1.098612289	0	4.059116269	4.080140832	4.422540982	4.545950826	6.634961819	6.646877409	5.049856007	5.019760202	5.163356381	2.708050201	2.63008866	2.397895273	4.79268656	4.471638793	4.430816799	5.189104998	5.2994717	5.071805649	0	0	0	4.251786961	4.394449155	4.206985511
6643_bclustnum_5937_kamer_1_number_1	0	0	0	6.7209087	6.763719768	6.696152377	0	1.098612289	0	0	0	0	0	0	0	0	0	0	0	0	0	0	0	0	0	0	0	0	0	0
66874_bclustnum_37_kamer_1_number_1	7.788389817	7.775275846	7.784831058	0	0	0	0	0	1.4663363	2.806724413	4.086740726	4.035224225	0	0	0	0	0	0	0	0	0	0	0	0	0	0	0	3.228826156	2.917770732	3.314186005
66889_bclustnum_752_kamer_35_number_2	6.029080608	6.130502314	6.238324625	6.573680167	6.606650186	6.543432594	0	0	0	0	0	0	0	0	0	1.098612289	0	0	0	0	0	0	0	0	0	0	0	0	0	0
6690_bclustnum_13_kamer_1_number_1	0	0	0	0	0	0	2.97892685	3.270834298	3.262360511	6.26255219	6.608599636	6.484296247	0	0	0	1.098612289	0	1.098612289	3.030824283	2.335374593	2.751537441	1.609437912	1.550598322	1.098612289	0	0	0	2.862200881	2.327277706	2.065455441
6700_bclustnum_763_kamer_1_number_1	4.792114375	4.945605986	4.699470765	6.678845133	6.826978969	6.779012403	0	0	0	0	0	0	0	0	0	0	0	0	0	0	0	0	0	0	0	0	0	0	0	0
67053_bclustnum_26_kamer_1_number_1	0	0	0	0	0	0	6.583716229	6.565421296	6.608300176	0	0	0	0	0	0	0	0	0	0	0	0	0	0	0	0	0	0	0	0	0
6722_bclustnum_7034_kamer_11_number_2	0	0	0	0	0	0	0	0	0	0	0	0	0	0	0	0	0	0	0	0	0	0	0	0	6.591281337	6.687998486	6.725033642	0	0	0
67307_bclustnum_221_kamer_1_number_1	6.625657585	6.481577129	6.413131035	0	0	0	0	0	1.098612289	0	0	0	0	0	0	0	0	0	0	0	0	0	0	0	0	0	0	0	0	0
67327_bclustnum_175_kamer_1_number_1	0	1.609437912	2.172223528	0	0	0	0	0	0	0	0	0	0	0	0	0	0	0	0	0	0	0	0	0	6.945368932	6.763884909	6.798609832	0	0	0
67430_bclustnum_13_kamer_1_number_1	0	0	0	0	0	0	3.936715618	4.087175593	4.077537444	6.113436574	6.52816696	6.580639137	0	0	1.098612289	0	0	0	1.098612289	1.098612289	2.751537441	0	0	1.435084525	0	0	0	4.705920089	4.723841716	4.657762636
682_bclustnum_1452_kamer_1_number_1	0	1.098612289	1.609437912	6.52708034	6.387888911	6.33150185	0	0	1.098612289	0	0	1.098612289	1.098612289	1.098612289	1.098612289	0	0	0	0	0	0	0	0	0	0	0	1.609437912	0	0	0
68321_bclustnum_233_kamer_1_number_1	6.602286626	6.541992018	6.567610105	1.098612289	0	1.098612289	0	0	0	0	0	0	5.216743905	5.060485214	5.067507	0	0	0	0	0	0	0	0	0	0	0	0	4.784712885	4.784712885	4.421514139
68536_bclustnum_36_kamer_1_number_1	6.690566463	6.636092214	6.588008587	5.965292528	5.99451489	5.961863219	0	0	0	1.609437912	0	0	1.526056303	1.098612289	0	0	0	0	0	0	0	0	0	1.098612289	0	0	0	0	0	0
68561_bclustnum_112_kamer_1_number_1	0	0	0	0	0	0	0	0	0	6.473534151	7.47912458	7.477909626	0	0	0	0	0	0	0	0	0	0	0	0	0	0	0	0	0	0
68589_bclustnum_137_kamer_1_number_1	0	0	0	0	0	0	0	0	0	5.99346255	7.128295444	7.163946684	0	0	0	0	0	0	0	0	0	0	0	1.098612289	0	0	0	0	0	0
68653_bclustnum_228_kamer_1_number_1	1.098612289	1.098612289	1.504077397	6.521042247	6.346074861	6.426257039	0	0	0	0	0	0	0	0	0	0	0	0	0	0	0	0	0	0	0	0	0	0	0	0
6866_bclustnum_4202_kamer_1_number_1	6.810803753	6.709859064	6.800837997	0	0	0	0	0	0	0	0	0	0	0	0	0	1.098612289	0	0	0	0	0	0	0	0	0	0	0	0	0
68685_bclustnum_129_kamer_1_number_1	0	0	0	0	0	0	0	0	1.098612289	6.307693988	6.467181512	6.521274817	0	0	0	0	0	0	0	0	1.098612289	1.098612289	0	0	0	0	0	0	0	0
6873_bclustnum_325_kamer_1_number_1	1.845826164	0	1.098612289	0	0	0	0	0	0	0	0	0	0	0	0	0	1.098612289	1.609437912	0	0	0	1.098612289	1.550598322	0	6.865473887	6.975937155	6.971978125	0	0	0
68879_bclustnum_2_kamer_1_number_1	0	0	0	0	0	0	5.946291957	5.972110969	5.79063884	5.21795294	5.628020315	5.768667811	0	0	0	0	1.098612289	1.098612289	7.069780587	6.893768924	6.980280571	0	0	0	0	0	0	0	0	0
69010_bclustnum_56_kamer_1_number_1	6.503913852	6.453231221	6.475047434	0	0	0	0	0	0	0	0	0	1.098612289	0	0	0	0	0	0	0	0	0	0	0	0	0	0	0	0	0
6916_bclustnum_1168_kamer_1_number_1	0	0	0	0	0	0	0	0	0	1.098612289	0	0	1.098612289	1.098612289	0	0	0	0	0	1.098612289	1.098612289	0	0	0	6.470283891	6.538139824	6.601380923	0	0	0
691_bclustnum_2345_kamer_1_number_1	0	0	0	0	0	0	0	0	0	6.407292442	6.946013991	7.086620871	0	0	0	0	0	0	0	0	0	0	0	0	0	0	0	0	0	0
6922_bclustnum_3065_kamer_1_number_1	0	0	0	6.872719636	6.891480561	6.438042807	0	0	0	0	0	0	0	0	0	0	0	0	0	0	1.098612289	1.421386371	0	0	0	0	0	0	0	0
69380_bclustnum_296_kamer_1_number_1	0	0	0	0	0	0	0	0	0	5.655603624	7.051509243	6.355914934	0	1.098612289	0	0	0	0	0	0	1.098612289	0	0	0	0	0	0	0	0	0
6944_bclustnum_2343_kamer_1_number_1	1.4663363	1.098612289	0	0	0	0	0	0	0	0	1.098612289	0	0	0	0	0	0	0	0	0	0	0	0	0	6.387888911	6.485991567	6.560086798	0	0	0
69460_bclustnum_28_kamer_1_number_1	6.371122839	6.332771506	6.60484721	6.238502344	6.335215586	6.321911525	0	0	1.098612289	0	0	0	1.098612289	0	0	0	0	0	0	0	0	0	0	0	0	0	0	0	0	0
69503_bclustnum_76_kamer_1_number_1	0	1.098612289	0	0	0	0	3.876866183	3.949494112	4.080614062	4.50613849	7.055468138	6.921924421	3.80666249	3.591423724	4.110873864	1.504077397	1.413693065	1.609437912	1.189582763	0	0	3.545779572	3.186352633	3.471966453	0	1.098612289	1.098612289	4.049409956	4.14024484	4.080614062
6964_bclustnum_16_kamer_1_number_1	6.970964792	7.031741259	6.945051064	0	0	0	0	0	0	0	1.098612289	0	0	0	0	0	0	0	0	0	0	0	0	0	0	0	0	0	0	0
6982_bclustnum_6988_kamer_1_number_1	7.273092596	6.885765261	7.216217442	0	0	0	0	0	0	0	0	0	0	0	0	1.098612289	0	0	0	0	0	0	0	0	0	0	0	3.044522438	2.691243083	2.442347035
70328_bclustnum_38_kamer_1_number_1	0	0	0	0	0	0	1.098612289	0	0	6.001605454	6.818725138	6.782707796	1.098612289	0	0	0	0	0	0	0	0	1.098612289	0	0	0	0	0	0	0	0
7034_bclustnum_2395_kamer_1_number_1	6.559898483	6.564419542	6.53116913	0	0	1.098612289	1.904238091	0	0	0	0	0	0	0	0	1.098612289	0	0	1.098612289	0	0	0	0	0	0	0	0	0	0	0
7037_bclustnum_7529_kamer_1_number_1	6.819547914	6.798419093	6.853299093	0	0	0	0	0	0	0	0	0	0	0	0	0	0	1.098612289	0	0	0	1.427117156	1.652922599	1.098612289	0	0	0	0	0	0
70424_bclustnum_10_kamer_1_number_1	0	1.488076733	1.098612289	1.098612289	0	0	4.254599431	4.474710642	4.253974489	6.002827246	7.024310895	6.927979386	0	1.734601644	1.098612289	4.65688939	4.565835626	4.509287943	4.874021059	4.966829686	5.127357026	5.504750066	5.558610256	5.486575434	0	0	0	4.551769409	4.522776133	4.435906207
70454_bclustnum_77_kamer_37_number_2	6.628834712	6.671273163	6.731733835	2.00148	2.397895273	1.098612289	0	0	0	0	0	0	0	0	0	0	0	0	0	0	0	0	0	0	0	0	0	0	0	0
7048_bclustnum_441_kamer_1_number_1	0	0	0	0	0	0	1.526056303	1.098612289	1.526056303	6.727910652	6.291363563	6.155282632	4.847331743	4.784712885	4.773502684	0	0	0	0	1.413693065	1.974081026	0	0	0	0	0	0	0	0	0
70563_bclustnum_127_kamer_1_number_1	0	0	0	0	0	0	0	0	0	6.830754357	6.835542587	6.854090754	0	0	0	0	0	0	1.098612289	0	1.504077397	1.098612289	2.047692843	1.098612289	0	0	0	0	0	1.098612289
70799_bclustnum_551_kamer_1_number_1	6.956545443	6.824839866	6.838405201	0	0	0	0	0	0	0	0	0	0	0	0	0	0	0	0	0	0	0	0	0	0	0	0	1.098612289	1.098612289	1.098612289
71198_bclustnum_84_kamer_1_number_1	0	0	1.098612289	0	0	0	0	0	0	0	0	0	0	0	0	0	0	0	0	0	0	0	0	0	6.666774842	6.945696328	6.856111397	0	0	0
71216_bclustnum_6_kamer_1_number_1	6.479874302	6.553141067	6.483277062	0	0	0	0	0	0	0	0	0	0	0	0	0	0	0	0	0	0	0	0	0	0	0	0	0	0	0
7126_bclustnum_5180_kamer_1_number_1	0	0	0	0	1.098612289	0	3.583518938	3.127558463	3.628776415	4.998562713	6.639701963	6.586906557	0	0	0	0	0	0	0	0	0	1.098612289	1.694594904	1.098612289	0	0	0	0	0	0
7137_bclustnum_2727_kamer_1_number_1	0	0	0	0	0	0	1.098612289	1.098612289	0	6.480896959	7.144233527	7.055692409	1.098612289	0	0	0	0	0	1.098612289	1.098612289	0	1.098612289	0	0	0	0	1.098612289	0	0	0
71428_bclustnum_19_kamer_1_number_1	0	0	0	0	0	0	0	0	0	0	0	0	0	0	0	0	0	0	0	0	0	0	0	0	0	0	0	6.781511552	6.820452951	6.73054066
7158_bclustnum_659_kamer_25_number_3	6.771281275	6.819860239	6.893221169	0	0	0	0	0	0	0	0	0	0	0	0	0	0	0	0	0	0	0	1.098612289	0	0	0	0	0	0	0
71763_bclustnum_107_kamer_1_number_1	0	1.098612289	0	0	1.098612289	0	0	0	1.098612289	0	0	0	0	0	0	0	0	0	0	0	0	0	0	0	6.618357068	6.449680221	6.552915792	0	0	0
71836_bclustnum_131_kamer_1_number_1	1.540445755	1.098612289	1.098612289	0	0	0	0	0	0	0	0	0	0	0	0	0	0	0	1.098612289	1.098612289	0	0	0	0	6.996278845	6.905196007	6.884713852	0	0	0
71981_bclustnum_14_kamer_1_number_1	0	0	0	0	0	0	0	0	0	6.006845649	6.758558973	6.289251641	1.098612289	1.098612289	2.240709689	1.098612289	1.098612289	1.098612289	1.526056303	0	0	1.098612289	1.098612289	0	0	0	0	0	1.098612289	0
72193_bclustnum_29_kamer_1_number_1	6.667592722	6.72982407	6.698576268	1.446918983	1.098612289	0	0	0	0	1.098612289	1.098612289	1.098612289	0	0	0	2.197224577	2.463853241	1.609437912	0	1.098612289	1.098612289	2.621038824	2.475605192	2.944438979	0	0	0	0	1.098612289	0
72332_bclustnum_740_kamer_1_number_1	0	0	0	0	0	0	0	0	0	6.469938452	7.595387279	7.59739632	0	0	0	0	0	0	1.098612289	0	0	1.098612289	0	0	0	0	0	1.098612289	1.098612289	0
72739_bclustnum_10_kamer_1_number_1	0	0	0	1.386294361	0	0	0	1.652922599	1.098612289	6.26435019	6.506870167	6.470658627	0	0	0	1.252762968	1.236761337	1.098612289	1.435084525	1.563976003	0	1.386294361	1.265665091	1.669156712	0	0	0	0	1.098612289	1.098612289
7283_bclustnum_7_kamer_1_number_1	0	0	0	0	0	0	0	0	0	6.189632796	6.847651709	6.794959412	0	0	0	0	0	0	0	0	0	0	0	0	0	0	0	0	0	0
72861_bclustnum_77_kamer_9_number_2	6.365610972	6.270042805	6.286463536	6.523562306	6.463809184	6.46419882	0	0	0	0	0	0	0	0	0	0	0	0	0	0	0	0	0	0	0	0	0	0	0	0
7343_bclustnum_39_kamer_20_number_2	0	0	0	0	0	0	0	0	0	6.416498595	6.842073705	6.742374612	6.285465364	6.313288955	6.280128013	1.421386371	1.904238091	1.4663363	0	1.272966076	0	1.098612289	1.815290432	1.609437912	0	0	0	5.642414035	5.660478235	5.56013148
73453_bclustnum_371_kamer_1_number_1	0	1.098612289	1.098612289	5.409858741	5.331752143	5.237505227	4.915591745	4.861361591	4.881285622	6.344231866	6.610965187	6.589476533	6.033565723	5.973809612	6.09356977	1.098612289	1.098612289	1.757857918	4.262679877	4.374498368	4.508659286	0	1.098612289	1.35812377	0	1.098612289	0	4.657762636	4.831508628	4.720282993
73585_bclustnum_30_kamer_1_number_1	0	0	1.098612289	0	0	0	0	0	0	0	0	0	0	0	0	0	0	0	0	0	0	0	0	0	6.747418672	6.49375384	6.722629795	0	0	0
73633_bclustnum_328_kamer_1_number_1	6.832432415	6.759384033	6.818924065	0	0	0	0	0	0	0	0	0	0	0	0	0	0	0	0	0	0	0	0	0	0	0	0	0	0	0
73753_bclustnum_108_kamer_1_number_1	0	0	0	6.425679069	6.534152144	6.481194208	1.098612289	1.098612289	0	0	0	1.098612289	1.609437912	0	1.504077397	1.540445755	1.098612289	1.098612289	0	1.645156346	1.265665091	2.197224577	1.280933845	0	0	0	0	0	0	0
74689_bclustnum_212_kamer_1_number_1	0	0	0	6.438818281	6.52532287	6.624065228	0	0	0	0	0	0	0	0	0	0	1.098612289	0	0	0	0	0	0	0	0	0	0	0	0	0
74920_bclustnum_65_kamer_1_number_1	0	0	0	0	0	0	0	0	0	6.938497846	6.564481565	6.563855527	0	0	1.098612289	0	1.098612289	0	1.098612289	1.098612289	1.904238091	0	1.386294361	0	0	0	0	0	0	1.098612289
75251_bclustnum_32_kamer_1_number_1	0	0	0	0	0	0	1.098612289	0	0	6.340359304	6.847853458	6.80635469	0	0	1.098612289	0	0	0	0	0	0	0	0	0	0	0	0	2.674148649	3.401197382	2.708050201
75837_bclustnum_268_kamer_1_number_1	1.609437912	1.098612289	1.098612289	0	0	0	0	0	0	0	0	0	0	0	0	0	0	0	0	0	0	0	0	0	6.83133741	6.794426434	6.744731516	0	0	0
7612_bclustnum_154_kamer_1_number_1	1.098612289	0	0	0	0	0	4.819386003	4.777256205	4.795790546	6.362243313	6.558197803	6.616659386	4.725421285	4.658180006	4.775385423	0	1.098612289	1.098612289	5.003946306	5.167319904	4.703503066	0	1.098612289	1.213023721	0	0	0	4.729597764	4.522995457	4.658180006
7678_bclustnum_8475_kamer_1_number_1	6.779239857	6.798163602	6.71489842	0	0	0	0	0	0	0	0	0	0	0	0	0	0	0	0	0	0	0	0	0	0	0	1.609437912	0	0	0
7691_bclustnum_471_kamer_1_number_1	0	0	0	0	0	0	0	0	0	6.088477821	7.033947304	6.942156706	0	0	0	0	0	0	0	0	0	0	0	0	0	0	0	0	1.386294361	0
7710_bclustnum_2424_kamer_4_number_2	0	0	1.098612289	6.527795624	6.478850598	6.457816204	0	0	0	0	0	0	0	0	0	0	0	0	0	0	0	0	1.098612289	0	0	0	0	0	0	0
77159_bclustnum_21_kamer_1_number_1	1.609437912	1.945910149	1.098612289	1.945910149	1.609437912	1.098612289	0	0	0	5.399808405	6.656298412	6.628481755	0	0	0	1.098612289	1.098612289	0	0	0	0	0	1.609437912	1.098612289	0	0	0	0	0	0
7725_bclustnum_33_kamer_1_number_1	0	0	0	0	0	0	3.115224958	3.362688682	3.940833955	4.509167967	6.633217112	6.530460631	4.685689703	4.515245478	4.569197871	1.098612289	1.496643165	0	3.1898877	3.152736022	3.403418247	4.024159909	4.075275566	3.984700813	0	0	0	4.059116269	4.229637111	3.976080786
7735_bclustnum_3_kamer_1_number_1	0	0	0	0	0	0	0	0	0	6.405228458	6.849066283	6.968850378	4.691347882	4.672828834	4.59511985	3.433987204	3.80666249	3.555348061	0	0	0	4.890349128	4.94875989	5.198497031	0	0	0	4.532599493	4.465908119	4.828313737
7799_bclustnum_3314_kamer_1_number_1	0	0	0	4.023977533	3.840279927	3.739498897	3.375879574	4.106767082	3.539639613	5.163745433	6.536691598	6.629363253	4.987025428	4.987025428	5.043425117	4.193435465	3.965563772	3.834061464	5.131376912	4.755743044	4.793722293	4.836281907	4.300680995	4.265237168	4.914660227	5.362465186	5.233778845	3.979681654	3.518980417	3.865979067
78251_bclustnum_13_kamer_1_number_1	1.098612289	1.098612289	1.098612289	0	0	0	0	0	0	0	0	0	0	0	0	0	0	0	0	0	0	0	0	0	6.487303429	6.634304789	6.463809184	0	0	0
78413_bclustnum_49_kamer_50_number_3	0	0	0	0	0	0	0	0	0	0	0	0	0	0	0	0	0	0	0	0	0	0	0	0	6.552099815	6.509619744	6.524819958	0	0	0
7846_bclustnum_3913_kamer_1_number_1	1.098612289	1.550598322	1.609437912	1.098612289	0	0	0	0	0	1.098612289	0	1.609437912	1.098612289	0	0	0	0	0	1.558144618	1.098612289	0	0	0	0	6.88295016	6.935127226	6.817283376	0	1.098612289	1.098612289
7848_bclustnum_4337_kamer_1_number_1	0	0	0	0	0	0	0	0	0	4.107889086	6.630803431	6.617037938	0	0	0	0	0	0	0	0	0	0	0	0	0	0	0	0	0	0
78564_bclustnum_725_kamer_1_number_1	6.777267251	6.864035339	6.816979005	0	0	0	0	0	0	0	0	0	0	0	0	0	0	0	0	0	0	0	0	0	0	0	0	0	0	0
78669_bclustnum_36_kamer_1_number_1	6.940803133	6.940609616	6.981377419	0	0	0	0	0	1.945910149	0	0	0	0	0	0	0	0	0	0	0	0	0	0	0	0	0	0	0	0	0
78796_bclustnum_7_kamer_59_number_3	6.951456325	7.056175284	7.020485571	0	0	0	0	0	0	0	0	0	0	0	0	0	0	0	0	0	0	0	0	0	0	0	0	0	0	0
7879_bclustnum_191_kamer_1_number_1	7.598900457	7.640964165	7.769741873	0	0	0	1.098612289	0	0	0	0	0	0	0	0	0	0	0	0	0	0	0	0	0	0	0	0	0	0	0
78887_bclustnum_45_kamer_1_number_1	0	1.098612289	0	0	0	1.098612289	5.532258415	5.512851967	5.609471795	6.702136026	6.769970281	6.815169485	0	0	0	1.098612289	1.609437912	0	1.098612289	1.945910149	1.098612289	1.098612289	1.860752118	1.860752118	0	0	0	5.304726782	5.421167543	5.332718793
78957_bclustnum_18_kamer_1_number_1	6.506014228	6.447061776	6.473296384	0	1.098612289	1.098612289	1.098612289	1.098612289	0	1.4663363	1.098612289	0	1.178654996	0	0	2.351375257	1.913649615	2.408529438	1.446918983	1.098612289	1.575535671	2.089010612	2.564949357	1.287854288	0	0	0	0	0	0
78957_bclustnum_80_kamer_19_number_2	0	0	0	6.63813183	6.671188285	6.574611298	0	0	0	0	0	0	0	0	0	0	0	0	0	0	0	0	0	0	0	0	0	0	0	0
79164_bclustnum_385_kamer_13_number_3	7.095619779	6.999121327	7.009408933	0	0	0	0	0	0	0	0	0	0	0	0	0	0	0	0	0	0	0	0	0	0	0	0	0	0	0
7942_bclustnum_233_kamer_1_number_1	6.392396061	6.611464256	6.531086061	0	0	0	0	0	0	1.098612289	0	0	0	0	0	1.098612289	0	0	0	0	0	1.832581464	1.704748092	0	1.098612289	0	0	0	0	0
79447_bclustnum_368_kamer_1_number_1	1.609437912	0	1.335001067	1.098612289	1.609437912	0	0	1.871802177	0	1.791759469	0	0	1.098612289	0	0	1.860752118	2.384822928	2.858112535	1.098612289	0	0	1.838278803	2.164964207	2.162438727	6.523562306	6.232448017	6.49677499	0	1.098612289	0
79665_bclustnum_303_kamer_1_number_1	6.658011046	6.543911846	6.678342115	0	0	0	0	0	0	0	0	0	0	0	0	0	0	0	0	0	0	0	0	0	2.151762203	0	1.098612289	0	0	0
79704_bclustnum_353_kamer_1_number_1	0	0	1.098612289	0	0	0	0	0	0	0	0	0	0	0	0	0	0	0	0	0	0	0	0	0	6.763569616	6.814942378	6.848680206	0	0	0
79981_bclustnum_94_kamer_1_number_1	0	0	0	6.570882962	6.064043315	6.126141845	0	0	0	0	0	0	0	0	0	0	0	0	0	0	0	0	0	0	0	0	0	0	0	0
8000_bclustnum_6649_kamer_1_number_1	0	1.098612289	0	0	0	0	4.672828834	4.94875989	5.014627315	6.400441814	6.60979793	6.566047762	0	0	0	0	0	0	4.562262685	4.896346148	4.878246106	0	0	0	0	0	0	0	0	0
80094_bclustnum_756_kamer_1_number_1	0	1.098612289	0	0	0	0	0	0	0	0	0	0	1.098612289	0	1.098612289	0	0	0	0	0	0	0	0	0	6.34838871	6.343377672	6.502790046	0	0	0
80666_bclustnum_32_kamer_1_number_1	6.552507887	6.594960506	6.614993661	0	0	1.098612289	0	0	0	0	0	0	0	0	0	0	0	0	0	0	0	0	0	0	0	0	0	0	0	0
8070_bclustnum_86_kamer_1_number_1	0	0	0	0	0	0	0	0	0	6.389401389	7.654680165	7.648978083	0	0	0	0	0	0	0	0	0	0	0	0	0	0	0	0	0	1.098612289
80762_bclustnum_221_kamer_2_number_2	6.910182331	6.909613551	6.882144095	0	0	0	0	0	0	0	0	0	0	0	0	0	0	0	0	0	0	0	0	0	0	0	0	0	0	0
80989_bclustnum_25_kamer_1_number_1	6.969057318	6.946225711	6.833390505	4.666575679	4.567814053	4.687266169	0	0	0	1.32175584	0	0	0	0	0	0	0	0	0	0	0	0	0	0	0	1.098612289	1.098612289	0	0	0
8098_bclustnum_26_kamer_1_number_1	0	0	0	0	1.098612289	0	1.343733877	1.252762968	1.945910149	6.457816204	6.979610716	6.939089204	0	0	0	4.703883659	4.40976339	4.414312298	2.136137279	2.005333377	2.226424092	5.983936281	5.961327453	5.895091302	0	0	0	4.160302388	4.346163678	4.280446464
80990_bclustnum_81_kamer_2_number_2	0	0	1.098612289	0	0	0	0	0	0	0	0	0	0	0	0	0	0	0	0	0	0	0	0	0	7.089034626	7.036588151	7.117610936	1.609437912	1.945910149	0
8119_bclustnum_187_kamer_1_number_1	0	0	0	6.547741912	6.559615237	6.530877628	0	0	0	0	1.609437912	1.609437912	0	0	0	0	0	0	0	0	0	0	0	0	0	0	0	0	0	0
81233_bclustnum_17_kamer_1_number_1	0	0	0	0	0	0	1.098612289	1.526056303	1.098612289	3.484312288	3.407841924	3.135494216	0	0	0	0	0	0	6.869129829	6.670203425	6.750321048	0	0	0	4.167526868	4.167526868	4.066173114	1.098612289	0	1.098612289
81681_bclustnum_296_kamer_1_number_1	0	0	0	6.541029999	5.862337726	6.553458933	0	1.098612289	0	0	0	0	0	0	0	1.609437912	2.093234727	2.564949357	0	0	0	2.377486607	3.17805383	3.113515309	0	0	0	0	0	0
81716_bclustnum_108_kamer_1_number_1	0	0	0	0	0	0	1.098612289	1.098612289	1.4663363	6.735384449	7.292609433	7.323962484	0	0	0	0	0	0	0	1.35812377	1.098612289	0	0	0	0	0	0	0	0	0
81863_bclustnum_53_kamer_1_number_1	0	0	0	0	0	0	0	0	1.098612289	6.405228458	6.727165821	6.800540824	0	1.098612289	0	0	0	1.098612289	0	0	0	1.098612289	1.609437912	0	0	0	0	1.098612289	0	0
81960_bclustnum_9_kamer_3_number_2	6.606650186	6.688665998	6.69053167	2.282382386	2.76361735	2.708050201	1.098612289	0	0	1.098612289	1.098612289	0	0	0	0	0	1.098612289	0	0	0	1.4663363	1.824549292	0	0	0	0	0	0	0	0
81_bclustnum_4621_kamer_1_number_1	0	0	0	0	0	0	5.550370966	5.587248658	5.531233015	6.382379311	6.985641818	6.963880381	3.135494216	3.196814248	3.158934719	0	0	0	5.567997115	5.771441123	5.554895694	0	0	0	0	0	0	3.880625213	4.036651888	4.010633189
81_bclustnum_6804_kamer_1_number_1	1.098612289	1.098612289	0	0	0	0	0	1.098612289	0	5.807048799	6.76776191	6.717364453	0	1.098612289	0	0	0	0	0	0	0	0	0	0	0	0	0	0	0	0
82053_bclustnum_12_kamer_1_number_1	0	0	0	0	0	0	1.098612289	1.609437912	1.098612289	0	0	0	0	1.550598322	1.609437912	6.228151965	6.612407903	6.544957342	0	1.098612289	1.098612289	6.458766092	6.516865927	6.566953684	0	0	0	1.435084525	1.526056303	1.504077397
82129_bclustnum_68_kamer_1_number_1	1.913649615	1.4663363	1.098612289	0	0	0	0	0	0	0	0	0	0	0	0	0	0	0	0	0	0	0	0	0	7.248582305	7.235057023	7.263329617	0	0	0
8212_bclustnum_1858_kamer_1_number_1	0	0	0	0	0	0	0	1.845826164	1.098612289	6.561344619	6.82690633	6.694699425	0	0	0	2.093234727	1.35812377	1.773067525	1.098612289	1.098612289	0	1.098612289	1.098612289	1.35812377	0	0	0	1.098612289	1.098612289	0
8220_bclustnum_46_kamer_1_number_1	0	0	1.550598322	6.720461381	6.654667851	6.746177083	1.098612289	0	0	1.098612289	1.098612289	1.098612289	1.098612289	0	0	0	0	1.563976003	1.098612289	0	1.098612289	1.098612289	0	0	0	0	0	0	1.098612289	0
82431_bclustnum_35_kamer_1_number_1	0	0	0	0	0	0	3.713572067	3.091042453	3.484312288	0	0	0	0	0	0	0	0	0	3.92107194	3.828641396	3.354678636	0	0	0	0	0	0	6.627920999	6.476552275	6.476832353
82528_bclustnum_813_kamer_1_number_1	0	0	0	0	0	0	0	0	0	5.122969437	6.618738984	6.586861072	0	0	0	0	0	0	0	0	0	0	0	0	0	0	0	0	0	0
8285_bclustnum_151_kamer_1_number_1	6.832672832	6.799303323	6.786842225	0	0	1.098612289	0	0	0	1.098612289	0	0	0	0	0	0	1.098612289	0	1.098612289	0	1.098612289	0	0	0	0	0	0	3.503218327	3.57421748	3.36729583
82872_bclustnum_11_kamer_1_number_1	6.941673497	6.896694332	6.8949233	0	0	0	0	0	0	0	0	0	0	0	0	0	0	0	0	0	0	0	0	0	0	0	0	0	0	0
83082_bclustnum_23_kamer_14_number_3	1.178654996	0	1.658228077	0	0	0	0	1.098612289	1.098612289	2.197224577	0	1.098612289	1.526056303	1.526056303	1.098612289	0	0	1.098612289	0	0	0	1.098612289	0	0	6.674561392	6.77107608	6.675192506	0	0	0
833_bclustnum_3845_kamer_7_number_2	0	0	0	6.647256374	6.598055247	6.613384218	0	0	0	0	0	0	0	0	0	0	0	0	0	0	0	0	0	0	0	0	0	0	0	0
8341_bclustnum_2843_kamer_1_number_1	0	0	0	0	0	0	4.191031067	3.970291914	4.110873864	4.534251891	6.536133471	6.498861801	2.944438979	2.708050201	2.944438979	1.512587747	0	0	1.845826164	2.221615789	2.134704758	0	1.098612289	1.098612289	0	0	0	1.945910149	1.806797496	1.098612289
8366_bclustnum_785_kamer_1_number_1	0	1.609437912	0	0	0	0	0	0	0	0	0	0	0	0	0	0	0	0	0	0	0	0	0	0	7.215651659	7.118105341	7.195022265	0	0	0
83680_bclustnum_60_kamer_6_number_2	0	0	0	0	0	0	0	0	0	6.405701074	7.259517174	7.276258986	0	0	1.098612289	0	0	0	0	0	0	0	0	0	0	0	0	0	0	1.098612289
83747_bclustnum_45_kamer_1_number_1	6.604910837	6.658743768	6.570682662	0	0	0	0	0	0	0	0	0	0	0	0	0	0	0	0	0	0	0	0	0	0	0	0	0	0	0
84301_bclustnum_15_kamer_1_number_1	1.098612289	1.098612289	1.563976003	0	0	0	3.899950424	3.967930637	3.764102875	5.875983547	6.805030176	6.740814824	1.673975809	1.919592574	1.41706602	0	0	0	1.41706602	1.836211667	1.890850372	0	0	0	0	0	0	1.864785308	1.864785308	1.098612289
84440_bclustnum_16_kamer_1_number_1	6.56272654	6.629363253	6.445191108	0	0	0	1.098612289	0	0	0	0	0	0	0	0	0	0	0	2.34703729	2.1768155	1.836211667	0	0	0	0	0	0	0	0	0
8467_bclustnum_264_kamer_1_number_1	2.442347035	2.756840365	2.63905733	2.397895273	1.098612289	1.945910149	0	0	0	1.945910149	0	0	6.012318093	5.996807747	6.001060855	0	0	0	0	0	0	0	0	0	7.154420025	7.199304863	7.237059026	4.875197323	4.901036179	4.896772066
84871_bclustnum_117_kamer_1_number_1	1.504077397	1.098612289	1.098612289	0	0	0	1.386294361	0	0	0	0	0	0	0	0	0	0	0	0	0	0	0	0	0	7.171195887	6.936993642	7.139025718	0	0	0
84947_bclustnum_23_kamer_7_number_2	0	0	1.098612289	0	0	0	0	0	0	6.045597556	6.552032739	6.52013058	0	1.609437912	1.824549292	0	0	0	0	0	0	0	0	0	0	0	1.098612289	0	0	0
853_bclustnum_3627_kamer_1_number_1	0	0	0	0	0	0	0	0	0	7.279704968	8.355781884	8.364275085	0	0	0	0	0	0	0	0	0	0	0	0	0	0	0	0	0	0
853_bclustnum_68_kamer_1_number_1	0	0	0	0	0	0	0	0	0	0	0	0	6.337533445	6.479737766	6.502790046	0	0	0	0	0	0	0	0	0	0	0	0	0	0	0
85668_bclustnum_28_kamer_1_number_1	0	0	0	0	0	0	4.886046653	5.001062958	4.963844131	5.799525894	6.531709643	6.66440902	6.085150682	6.045344119	6.053767759	3.07797103	2.745435898	3.020424886	6.211746007	6.127805427	6.044327359	2.679060703	2.093234727	2.319114723	0	0	0	4.465908119	4.394449155	4.613596584
8569_bclustnum_267_kamer_1_number_1	6.45187386	6.45746643	6.524663022	0	1.098612289	0	0	0	0	0	0	0	0	0	0	0	0	0	0	0	0	0	0	0	0	0	0	1.609437912	0	0
85796_bclustnum_32_kamer_1_number_1	1.694594904	1.609437912	1.098612289	0	0	0	0	0	0	0	0	0	1.563976003	0	0	1.563976003	0	0	0	0	1.098612289	1.098612289	1.098612289	1.558144618	7.093495984	7.110875699	7.100670524	0	0	0
85811_bclustnum_58_kamer_1_number_1	1.098612289	1.734601644	1.4663363	0	0	0	2.047692843	1.757857918	1.098612289	3.958906591	4.356708827	4.682131227	0	0	0	1.098612289	0	0	3.280911216	3.044522438	3.126760536	0	1.098612289	0	6.932642994	6.965599569	6.779404728	0	0	1.098612289
85848_bclustnum_90_kamer_1_number_1	1.098612289	1.516348465	1.098612289	0	1.098612289	0	4.645764955	4.640257368	4.890349128	4.646312129	6.85512741	6.725033642	5.641669454	5.627862092	5.611422273	2.840107174	3.906123638	3.531538273	4.573335807	4.911183215	4.299550865	5.406117404	5.249804414	5.251042304	0	0	0	0	0	0
86095_bclustnum_183_kamer_1_number_1	1.098612289	0	1.098612289	0	0	0	1.098612289	1.504077397	0	0	0	0	2.197224577	1.609437912	1.609437912	1.550598322	0	1.098612289	1.098612289	0	1.098612289	0	1.098612289	0	6.452574053	6.389233449	6.518656017	0	1.098612289	0
86134_bclustnum_409_kamer_1_number_1	0	0	0	0	0	0	0	1.098612289	1.098612289	6.148468296	6.586958931	6.576668714	0	0	0	0	0	0	0	0	0	0	0	0	0	0	0	0	0	0
8640_bclustnum_621_kamer_1_number_1	1.098612289	1.098612289	1.098612289	0	0	0	0	0	0	0	0	0	0	0	0	0	0	0	0	0	0	0	0	0	6.621139305	6.613652639	6.343609747	0	0	0
86468_bclustnum_22_kamer_1_number_1	0	0	0	0	0	0	0	0	0	6.370328973	7.014365014	7.052721049	0	1.098612289	0	0	0	0	0	0	0	0	1.098612289	0	0	0	0	1.098612289	1.098612289	0
8664_bclustnum_753_kamer_1_number_1	0	0	0	0	0	0	5.402677382	5.49100171	5.413875707	5.822060203	6.423427142	6.570532761	0	0	0	1.609437912	1.098612289	1.098612289	5.671947751	5.903998521	5.953243334	1.609437912	1.887069649	1.945910149	0	0	0	0	0	0
8666_bclustnum_307_kamer_1_number_1	6.587550015	6.618405149	6.628372009	0	0	0	0	0	0	0	0	0	0	0	0	0	0	0	0	0	0	0	0	0	0	0	0	0	0	1.098612289
86843_bclustnum_94_kamer_1_number_1	6.946013991	6.931959968	6.899471059	0	0	0	0	0	0	0	0	0	1.652922599	2.079441542	1.35812377	0	0	0	0	0	0	0	0	0	0	0	0	0	0	0
8693_bclustnum_4_kamer_1_number_1	0	0	0	0	0	0	0	0	0	0	0	0	6.457218534	6.600259539	6.592262036	0	0	0	0	0	0	0	0	0	0	0	0	0	0	0
87142_bclustnum_156_kamer_1_number_1	0	0	0	0	0	0	0	0	0	0	0	0	0	0	0	0	0	0	0	0	0	0	0	0	6.479788394	6.371897277	6.572048949	0	0	0
8774_bclustnum_2363_kamer_1_number_1	0	0	0	0	0	0	1.098612289	1.609437912	1.098612289	5.873243916	6.40899985	6.515136305	5.38907173	5.393627546	5.362854325	0	0	0	4.923623917	4.979488565	4.727387819	0	0	0	0	1.098612289	1.098612289	0	0	0
8774_bclustnum_539_kamer_1_number_1	0	0	0	0	0	0	5.488561622	5.383241984	5.398985892	6.456350415	6.93084661	6.822692911	6.015935184	6.107022888	6.071995597	5.262690189	4.728997143	4.80625625	5.859748648	6.107428151	5.880278764	5.722097067	5.599432559	5.640938517	0	0	0	5.487055791	5.306915298	5.502000792
87835_bclustnum_58_kamer_1_number_1	0	0	0	0	0	0	1.665006953	0	0	0	1.098612289	0	6.589384419	6.511250408	6.487684018	1.098612289	0	1.098612289	0	0	1.098612289	0	0	1.098612289	0	0	0	0	0	0
88072_bclustnum_818_kamer_1_number_1	6.525239313	6.536898822	6.554949981	0	0	0	0	0	0	0	0	0	0	0	0	0	0	0	0	0	0	0	0	0	0	0	0	0	0	0
8823_bclustnum_68_kamer_1_number_1	0	0	1.098612289	0	0	0	5.843544417	5.701399638	5.656491686	7.01301579	7.304132551	7.318824654	6.328702562	6.235809747	6.184738408	5.490708884	5.740712104	5.428718239	5.336850343	5.799525894	5.653492186	6.250251266	6.308098442	6.258489089	1.550598322	0	0	5.815833558	5.80814249	5.864037343
88304_bclustnum_63_kamer_1_number_1	0	0	0	0	0	0	3.821369367	3.970291914	4.104294893	7.14983049	7.583700348	7.483306281	0	0	0	0	0	0	4.570578741	4.454347296	4.472454461	0	0	0	0	0	0	1.098612289	1.098612289	0
883_bclustnum_7082_kamer_1_number_1	6.47604886	6.51648889	6.522974762	0	0	0	0	0	0	0	0	0	0	0	0	0	0	0	0	0	0	0	0	0	0	0	0	0	0	0
88455_bclustnum_303_kamer_1_number_1	6.412182733	6.418002717	6.470283891	6.345636361	6.434867495	6.569792732	1.386294361	1.550598322	1.098612289	0	0	1.609437912	0	0	0	1.098612289	1.098612289	0	1.860752118	1.526056303	1.098612289	0	0	0	0	0	0	0	0	0
8858_bclustnum_495_kamer_1_number_1	0	0	0	0	0	0	0	0	0	6.252331537	7.102499356	6.889336693	0	0	1.098612289	0	0	0	0	1.098612289	1.098612289	0	0	0	0	0	0	0	0	0
88824_bclustnum_15_kamer_1_number_1	6.858144778	6.843749949	6.789872238	0	0	0	0	0	0	0	0	0	0	0	0	0	0	0	0	0	0	0	0	0	0	0	0	0	0	0
88824_bclustnum_15_kamer_8_number_2	6.818924065	6.705639095	6.726233402	1.098612289	1.098612289	1.609437912	0	0	0	1.824549292	0	0	1.098612289	0	0	0	0	0	0	0	0	1.098612289	0	0	0	0	0	4.706525692	4.705920089	4.682131227
89075_bclustnum_74_kamer_1_number_1	6.490289449	6.573480426	6.477632145	6.230199912	6.254653471	6.197606385	0	0	0	0	0	0	0	0	0	0	0	0	0	0	0	0	0	0	1.098612289	1.098612289	1.098612289	0	0	0
89108_bclustnum_39_kamer_1_number_1	0	0	0	0	0	0	0	0	0	0	0	0	6.579449803	6.572282543	6.627852205	0	0	0	0	0	0	0	0	0	0	0	0	0	0	0
89463_bclustnum_449_kamer_15_number_2	0	0	0	0	0	0	0	1.945910149	0	6.421947418	6.777190909	6.739099913	0	1.481604541	1.098612289	0	0	0	0	1.098612289	0	0	0	0	0	0	0	0	0	0
89535_bclustnum_219_kamer_1_number_1	6.516932448	6.555712447	6.485016842	0	0	0	0	0	0	2.31677001	1.098612289	1.098612289	0	0	0	0	0	1.098612289	0	0	1.098612289	1.098612289	0	0	0	0	0	0	0	0
89881_bclustnum_96_kamer_1_number_1	0	0	0	0	0	0	1.098612289	1.609437912	0	6.427182391	6.584988887	6.489422233	0	0	0	0	0	0	0	0	0	0	0	0	0	0	0	0	0	0
90593_bclustnum_482_kamer_1_number_1	6.512075142	6.745404571	6.763389405	3.48635621	3.135494216	3.191845783	0	0	0	0	0	0	0	0	0	0	0	0	0	0	0	0	0	0	0	0	0	0	0	0
90772_bclustnum_63_kamer_1_number_1	0	0	0	0	0	0	4.600874975	4.446006797	4.544813841	6.740688376	6.390480571	6.38278171	0	0	1.098612289	0	0	0	3.656209041	4.002125101	3.909160914	0	0	0	0	0	0	0	0	0
90892_bclustnum_9_kamer_1_number_1	0	0	0	0	0	0	1.098612289	1.652922599	1.773067525	5.618384341	6.657154453	6.602587892	1.32175584	0	1.098612289	1.446918983	2.036882362	2.065455441	2.437500527	1.897120485	2.221615789	2.120263136	1.098612289	1.977162385	0	0	0	0	0	0
9096_bclustnum_96_kamer_1_number_1	0	0	0	0	0	0	1.098612289	0	1.098612289	6.295433884	6.72568769	6.759149697	2.251291799	1.909542505	1.098612289	0	0	0	0	0	1.452252967	0	1.265665091	0	0	0	0	0	0	1.098612289
9102_bclustnum_216_kamer_1_number_1	5.271716685	5.25619244	5.496581988	1.609437912	0	1.609437912	1.421386371	1.540445755	1.717651753	6.382661683	7.220790721	7.225794379	1.098612289	1.985914895	0	0	1.098612289	0	1.845826164	0	1.098612289	0	0	1.098612289	0	0	0	5.486869473	5.483609507	5.512851967
92004_bclustnum_39_kamer_1_number_1	0	0	0	0	0	0	1.563976003	0	1.098612289	6.206420673	6.762151305	6.692496809	1.4663363	0	1.609437912	0	0	0	0	1.098612289	0	1.315676062	0	0	0	0	0	0	0	0
92028_bclustnum_318_kamer_1_number_1	0	0	0	0	0	0	1.098612289	0	0	1.098612289	0	0	0	0	0	0	0	0	0	0	1.609437912	0	0	0	0	0	0	6.56723486	6.50458753	6.52532287
92056_bclustnum_404_kamer_1_number_1	0	1.098612289	0	6.652493929	6.556168795	6.609541947	1.897120485	2.036882362	1.897120485	3.487812291	3.538887614	3.706579382	0	1.098612289	1.609437912	3.587480525	2.988561626	2.520000268	2.197224577	1.945910149	1.223775432	2.164964207	1.717651753	0	0	0	0	0	0	0
92266_bclustnum_238_kamer_1_number_1	6.623400997	6.543192162	6.59441346	4.992376275	4.727387819	4.640257368	0	0	0	0	1.098612289	1.098612289	0	0	0	0	1.526056303	0	0	0	0	0	0	1.098612289	0	0	0	0	0	0
92401_bclustnum_62_kamer_1_number_1	6.56462392	6.58942704	6.625995634	0	0	0	0	0	0	0	0	0	0	0	0	0	0	0	0	0	0	0	0	0	0	0	0	0	1.098612289	0
92590_bclustnum_179_kamer_1_number_1	6.539296897	6.494056366	6.502790046	0	0	0	0	0	0	0	0	0	0	0	0	0	0	0	0	0	0	0	0	0	0	0	0	0	0	0
92590_bclustnum_45_kamer_2_number_2	6.583409222	6.518409553	6.516932448	0	0	0	0	0	0	0	0	0	0	0	0	0	0	0	0	0	0	0	0	0	0	0	0	0	0	0
92602_bclustnum_152_kamer_1_number_1	0	0	0	0	0	0	0	0	0	6.467526351	7.289098445	7.165748466	0	0	0	0	1.098612289	0	0	0	0	0	0	0	0	0	0	0	0	0
926_bclustnum_613_kamer_1_number_1	0	0	0	0	0	0	0	0	1.098612289	6.367042449	6.839119844	6.819287933	1.098612289	0	1.098612289	0	0	1.098612289	0	0	0	0	0	0	0	0	0	0	0	0
9297_bclustnum_678_kamer_1_number_1	6.753955871	6.549364578	6.609498828	0	0	1.098612289	0	0	0	0	0	0	0	0	0	0	0	0	0	0	0	0	0	0	0	0	0	0	0	0
9328_bclustnum_784_kamer_1_number_1	0	0	0	0	0	1.098612289	4.623569869	4.399726563	4.51867831	5.901460515	6.742711989	6.726747659	3.931825633	3.682038609	3.523683415	1.349925976	2.120263136	1.749199855	3.741066224	4.217404023	4.319391634	3.068052935	3.717996411	3.616905357	0	0	0	2.822461633	3.07577652	2.89652501
93319_bclustnum_112_kamer_1_number_1	1.098612289	0	0	0	0	0	0	0	0	5.552184091	6.551437414	6.492618551	0	0	0	0	0	0	0	0	0	1.098612289	0	0	0	0	0	0	1.098612289	0
93603_bclustnum_162_kamer_10_number_2	0	0	0	0	0	0	4.892849758	4.965170594	4.828313737	6.317164687	7.004273819	7.046063992	0	0	0	0	0	0	0	0	0	0	0	0	0	0	0	0	0	0
93656_bclustnum_215_kamer_1_number_1	0	0	0	1.098612289	1.413693065	0	0	0	0	6.422272463	6.828495598	6.803061208	0	1.098612289	0	0	0	0	0	0	0	0	0	0	0	0	0	0	0	0
93709_bclustnum_10_kamer_1_number_1	0	0	0	0	0	0	0	1.098612289	0	6.544550491	6.441300545	6.480896959	0	0	0	0	0	0	0	0	0	0	0	1.098612289	0	0	0	0	0	0
93738_bclustnum_39_kamer_1_number_1	0	0	0	0	0	0	0	0	0	0	0	0	6.615171881	6.620221196	6.668510293	0	0	0	0	0	0	0	0	0	0	0	0	0	0	0
9384_bclustnum_2700_kamer_1_number_1	0	0	0	0	0	0	4.408073208	4.643323021	4.157145637	6.517999136	6.75447472	6.652863029	5.555112305	5.160967263	5.369604937	5.854435617	5.501258211	5.473668855	5.661803561	6.149655625	5.745493674	5.437596584	5.463361355	5.371670054	1.098612289	1.686398954	1.609437912	5.153291594	5.286583797	5.092387309
9407_bclustnum_1187_kamer_1_number_1	5.33753808	5.365976015	5.282355653	5.416100402	5.333525231	5.358155797	4.281284604	3.814041862	4.324132656	6.158391124	7.047951909	6.992859004	5.564520407	5.497168225	5.484103747	5.247024072	4.579852378	4.830974195	5.783311204	5.727391574	5.453897025	5.204923849	5.299980982	5.28911011	2.512302921	2.313634819	2.658348622	4.497955731	4.151039906	4.217053225
94234_bclustnum_86_kamer_1_number_1	7.107605638	7.044713294	7.079369719	3.718976946	4.035224225	4.050817523	0	0	0	0	0	0	0	0	0	0	0	0	0	0	0	0	0	0	0	0	0	0	0	0
94370_bclustnum_40_kamer_1_number_1	1.098612289	1.098612289	0	0	0	1.098612289	4.048881607	4.369447852	3.713572067	5.433722004	6.575075841	6.506281694	5.564520407	5.286583797	5.505331536	5.051988348	5.329491369	5.023880521	4.65396035	4.809473367	4.641183839	5.563243731	5.289947436	5.506684279	0	0	0	5.420534999	5.476463552	5.530749644
9453_bclustnum_541_kamer_1_number_1	7.657438735	7.644598719	7.598399329	0	0	0	0	0	0	0	0	0	0	0	0	0	0	0	0	0	0	0	0	0	0	0	0	0	0	0
94809_bclustnum_110_kamer_1_number_1	6.769871572	6.670259221	6.735304842	0	0	0	0	0	0	0	0	0	0	0	0	0	0	0	0	0	0	0	0	0	0	0	0	0	1.098612289	0
9487_bclustnum_31_kamer_1_number_1	0	0	0	0	0	0	3.876395828	3.891820298	3.33220451	6.80682936	7.164720379	7.219459007	0	0	0	0	1.098612289	1.098612289	6.004504161	5.966146739	5.951943789	0	0	1.098612289	0	0	0	0	0	0
94964_bclustnum_27_kamer_1_number_1	0	1.609437912	1.35812377	0	0	0	0	0	0	0	0	0	0	0	0	0	0	0	0	0	0	0	0	0	6.442274208	6.417276252	6.516440087	0	0	0
95285_bclustnum_359_kamer_1_number_1	4.659895086	4.695924549	4.943291063	4.25087384	4.61181506	4.541519804	5.020334768	5.13186719	5.127926357	6.418364936	7.057321179	7.042434762	5.729557428	5.576581479	5.722496274	5.239983556	4.558723025	4.791965056	5.810640868	5.549675127	5.821452911	5.654826797	5.611162673	5.787918332	4.094344562	3.718438256	4.204692619	5.261824529	5.236032304	5.221187911
952_bclustnum_1667_kamer_20_number_3	0	0	0	0	0	0	1.098612289	0	0	6.625582005	6.930494766	6.786232635	0	0	0	0	0	0	1.098612289	0	1.098612289	0	0	0	0	0	0	0	0	0
95588_bclustnum_259_kamer_1_number_1	2.397895273	2.311635019	2.833213344	2.397895273	2.833213344	2.708050201	4.080614062	3.565683043	3.462891236	4.285883233	6.557681357	6.333826548	5.002824872	4.865432242	4.873921701	1.763588021	1.098612289	1.098612289	2.412936135	1.969441112	0	4.463816277	4.231468245	4.25561271	2.047692843	1.386294361	1.533929576	3.713572067	3.570813566	3.949494112
95632_bclustnum_75_kamer_1_number_1	0	1.098612289	0	0	0	0	0	0	0	0	0	0	0	0	0	0	0	0	0	0	0	0	0	0	6.574676877	6.728115323	6.523142247	0	0	1.098612289
95875_bclustnum_62_kamer_1_number_1	0	0	0	0	0	0	1.871802177	0	1.609437912	6.670766321	6.840279114	6.759835149	0	0	0	1.098612289	0	0	1.098612289	1.098612289	1.945910149	1.098612289	0	0	0	0	0	0	0	0
959_bclustnum_2338_kamer_1_number_1	0	0	0	0	0	0	1.098612289	0	1.098612289	6.552915792	6.366899909	6.500217023	0	0	0	0	0	0	0	1.098612289	0	0	0	1.098612289	0	0	0	0	0	0
96887_bclustnum_35_kamer_1_number_1	5.272142781	5.247024072	5.258364786	6.491735162	6.520621128	6.550365794	0	0	0	0	0	1.098612289	0	1.609437912	0	0	0	1.098612289	0	1.098612289	1.098612289	0	1.098612289	1.824549292	0	0	0	0	0	0
97172_bclustnum_232_kamer_1_number_1	0	0	0	0	0	0	0	0	0	6.778784898	6.963946559	6.983419183	0	1.098612289	0	0	1.098612289	0	0	1.098612289	0	1.446918983	1.704748092	0	0	0	0	0	0	0
97274_bclustnum_18_kamer_1_number_1	0	0	0	0	0	0	0	0	0	6.56948142	6.467698726	6.489204931	0	0	0	1.408767439	1.712977772	0	0	0	0	0	1.098612289	1.098612289	0	0	0	0	0	0
97281_bclustnum_63_kamer_1_number_1	1.098612289	1.945910149	0	0	0	0	0	1.427117156	0	5.048020991	6.781705543	6.643975914	2.294863357	1.791759469	2.720097342	0	1.838278803	0	1.098612289	0	2.214174556	1.757857918	1.098612289	1.572396263	0	0	0	0	0	0
97396_bclustnum_21_kamer_26_number_2	1.098612289	0	1.098612289	0	0	0	0	0	0	0	0	0	0	0	0	0	0	0	0	0	0	0	0	0	6.763389405	6.621786405	6.687286896	0	0	0
97472_bclustnum_4_kamer_1_number_1	0	0	0	0	0	0	0	1.32175584	1.609437912	7.040632708	7.744569809	7.748891337	4.592591404	4.668144985	4.564348191	2.917770732	2.833213344	2.803360381	0	0	1.098612289	3.64414356	3.375879574	3.056356895	0	0	0	1.098612289	1.098612289	1.098612289
97541_bclustnum_191_kamer_1_number_1	0	0	0	0	0	0	0	0	0	6.315358002	7.071293189	7.071479981	0	0	0	0	0	0	0	0	0	0	0	0	0	0	0	0	0	0
975_bclustnum_1386_kamer_1_number_1	1.098612289	0	1.098612289	0	0	0	0	0	0	0	0	0	0	0	0	0	0	0	0	0	0	0	0	0	6.534272732	6.449416154	6.620814265	0	0	0
97689_bclustnum_171_kamer_1_number_1	1.609437912	1.098612289	1.504077397	1.704748092	0	0	0	0	0	2.397895273	0	0	0	0	0	0	0	1.098612289	0	0	0	0	0	1.098612289	7.060476366	7.049350323	7.072990017	1.098612289	1.098612289	2.09714147
97846_bclustnum_90_kamer_1_number_1	1.098612289	0	1.098612289	6.788846735	6.771426835	6.843394875	0	0	0	0	0	0	0	0	0	0	0	0	0	0	0	1.704748092	0	0	0	1.098612289	0	0	0	0
9784_bclustnum_60_kamer_1_number_1	4.578452424	4.317488114	4.436212928	1.609437912	0	0	5.032814181	5.242709515	5.369791158	4.73380084	4.746513486	4.854160805	0	0	0	0	1.098612289	0	6.796663929	6.722973899	6.503859938	1.098612289	1.098612289	0	1.098612289	0	1.098612289	0	0	0
9792_bclustnum_2097_kamer_2_number_2	0	0	0	0	0	0	0	1.098612289	1.435084525	6.659550297	6.853299093	6.811464619	0	0	0	0	0	0	0	0	0	0	0	0	0	0	0	0	0	0
9802_bclustnum_314_kamer_1_number_1	0	0	0	0	0	0	0	0	0	6.755070191	7.12969811	7.057682768	0	0	0	0	0	0	1.098612289	0	0	0	0	0	0	0	0	0	0	1.098612289
98100_bclustnum_154_kamer_1_number_1	0	1.945910149	0	0	1.098612289	0	3.620696968	3.261586595	3.949494112	3.189352262	6.573553064	6.540504609	4.480430887	4.110873864	4.371746474	0	0	0	1.945910149	2.606054389	2.126399075	3.410246316	3.275426276	3.211577255	0	0	0	3.756963246	3.756963246	3.570813566
98120_bclustnum_22_kamer_1_number_1	0	0	0	0	0	0	1.098612289	1.098612289	0	5.937055879	6.66771986	6.660831199	5.469746482	5.355642433	5.404477562	0	0	1.098612289	0	0	0	0	1.098612289	1.098612289	0	0	0	0	0	0
9818_bclustnum_296_kamer_1_number_1	0	0	0	0	0	0	1.098612289	0	1.098612289	6.65221766	6.771744243	6.760414691	0	0	0	0	0	0	1.098612289	0	1.098612289	1.098612289	0	0	0	0	0	0	0	0
98289_bclustnum_17_kamer_1_number_1	1.098612289	1.098612289	0	0	0	0	0	0	0	0	0	0	0	0	0	0	0	0	0	0	0	0	0	0	6.588080177	6.600706884	6.600498873	0	0	0
9874_bclustnum_615_kamer_1_number_1	1.413693065	1.098612289	1.098612289	0	0	0	0	0	0	0	0	0	0	0	0	0	1.609437912	1.098612289	0	0	0	0	0	0	6.756285669	6.687801635	6.714035812	0	0	0
98788_bclustnum_30_kamer_1_number_1	0	1.098612289	0	0	0	0	0	1.098612289	0	1.098612289	1.386294361	1.098612289	6.66057515	6.663132696	6.654581552	3.791736088	3.923073721	4.058525656	1.098612289	0	1.098612289	3.227724559	3.351853064	3.72435277	0	0	0	1.76766143	1.098612289	1.098612289
9878_bclustnum_270_kamer_1_number_1	0	0	0	0	0	0	2.197224577	1.098612289	2.681021529	4.798151393	6.719185845	6.629740989	4.983606622	5.070996352	5.031443951	0	0	1.098612289	3.391628411	3.17805383	2.754571126	1.098612289	1.098612289	0	0	0	0	3.433987204	3.753418757	4.189654742
98863_bclustnum_36_kamer_1_number_1	5.137755345	4.94875989	5.487904134	5.213124335	5.081404365	5.299980982	4.20800355	4.311545156	4.170962952	6.268465403	6.75447472	6.731681365	5.872117789	5.959571322	6.047963021	3.729702249	4.26969745	4.332194115	1.909542505	1.558144618	2.818398258	4.825108606	5.281933887	5.119489699	0	0	0	4.250081127	4.139601508	4.372256563
99131_bclustnum_193_kamer_1_number_1	6.591369159	6.57693325	6.609498828	0	0	0	0	0	0	0	0	0	0	0	0	0	0	0	0	0	0	0	0	0	0	0	0	0	0	0
99392_bclustnum_57_kamer_1_number_1	0	0	0	0	0	0	0	0	0	1.098612289	0	0	0	0	0	0	0	0	0	0	0	0	0	0	0	0	0	6.658866905	6.520867047	6.733076839
99493_bclustnum_102_kamer_1_number_1	1.609437912	1.098612289	0	0	0	0	0	0	1.880313545	6.529418838	6.873607835	6.392829595	0	0	0	0	0	0	0	0	1.098612289	0	0	0	0	0	0	0	0	0
99593_bclustnum_1114_kamer_1_number_1	0	0	0	0	0	0	4.991669916	4.573421488	4.999055169	6.287350996	6.679599186	6.750250815	3.214160726	2.789488857	3.054001182	2.162438727	1.838278803	1.964778166	5.730911142	5.452646602	5.423914239	1.098612289	0	0	0	0	0	1.481604541	1.913649615	2.054123734
99898_bclustnum_59_kamer_1_number_1	6.560626058	6.670766321	6.76811038	0	0	0	0	0	0	0	0	0	0	0	0	0	0	0	0	0	0	0	0	0	1.824549292	1.609437912	1.609437912	0	0	0
99961_bclustnum_14_kamer_1_number_1	0	0	0	0	0	0	4.051784948	4.143134726	4.154969184	6.518326893	6.058344855	6.177425307	0	0	0	0	0	0	3.417726684	3.624340933	3.96081317	0	0	0	0	0	0	0	0	0
