# Supplementary material for: Comparative Genomics Analysis of Repetitive Elements in Ten Gymnosperm Species: “Dark Repeatome” and Its Abundance in Conifer and Gnetum Species
Source: Life (Basel). 2021 Nov 15;11(11):1234. doi: 10.3390/life11111234 (PMC8620675; doi:10.3390/life11111234)
Supplement: Supplementary file 1 [file life-11-01234-s001.zip › Table_S4_Abundance_matrix_of_kChains_aligned_CyprinusCarpio.txt]

Table S4. Abundance matrix of kChains aligned to Cyprino carpio genomic sequences across samples of all plants
RepeatName	Annotation	JuniperusCommunis	JuniperusCommunis	JuniperusCommunis	TaxusBaccata	TaxusBaccata	TaxusBaccata	PinusSylvestris	PinusSylvestris	PinusSylvestris	SiberianPine	SiberianPine	SiberianPine	SiberianLarch	SiberianLarch	SiberianLarch	WhiteSpruce	WhiteSpruce	WhiteSpruce	LoblollyPine	LoblollyPine	LoblollyPine	NorwegianSpruce	NorwegianSpruce	NorwegianSpruce	GnetumGnemon	GnetumGnemon	GnetumGnemon	AbiesSibirica	AbiesSibirica	AbiesSibirica	Annotation
File_R_cluster_1_biclust_result_1_bclustnum_100177_kamer_1_number_1	emb|LN590674.1| Cyprinus carpio genome assembly common carp genome ,scaffold LG42	6.052545535	6.40428752	6.113281657	1.386294361	0.899762897	1.148966309	0	0	0	0	1.076870983	0	0	0	0	0	1.364633959	0.693147181	0.693147181	0	1.268512575	0	0	0	1.488525987	1.789441785	1.459907211	0.693147181	0	0	emb|LN590674.1| Cyprinus carpio genome assembly common carp genome ,scaffold LG42
File_R_cluster_1_biclust_result_1_bclustnum_10138_kamer_1_number_1	emb|LN590713.1| Cyprinus carpio genome assembly common carp genome ,scaffold LG20	6.385917578	6.375944329	5.537334267	3.334434166	3.135494216	3.320229524	2.005973941	1.925290445	2.362803985	0	1.360976553	1.076870983	0	0	0	0	0	0	0.693147181	0.693147181	0.693147181	0	0	0	2.482378457	2.507637991	2.502001366	2.406124952	2.028945298	1.98329814	emb|LN590713.1| Cyprinus carpio genome assembly common carp genome ,scaffold LG20
File_R_cluster_1_biclust_result_1_bclustnum_101408_kamer_1_number_1	emb|LN590673.1| Cyprinus carpio genome assembly common carp genome ,scaffold LG45	0	0	0	0	0	0	0	0	0	7.952822617	0	0	0	0	0	0	0	0	0	0	0	0	0	0	0	0	0	0	0	0	emb|LN590673.1| Cyprinus carpio genome assembly common carp genome ,scaffold LG45
File_R_cluster_1_biclust_result_1_bclustnum_101946_kamer_1_number_1	emb|LN590705.1| Cyprinus carpio genome assembly common carp genome ,scaffold LG11	6.521254211	6.770078162	6.684405456	1.681758574	1.574347378	0.884544098	1.587777	0.850907054	1.086637543	0	1.462435622	1.604361047	0.693147181	0	0	0	0	0	0.693147181	0	0	0	0	0	2.690171322	1.701289391	2.853846077	0	0	0	emb|LN590705.1| Cyprinus carpio genome assembly common carp genome ,scaffold LG11
File_R_cluster_1_biclust_result_1_bclustnum_102_kamer_1_number_1	emb|LN590767.1| Cyprinus carpio genome assembly common carp genome ,scaffold 000000187	6.149711113	6.408737995	6.473197555	2.490524175	2.468319846	2.587959505	1.709650601	2.007983133	2.100061237	0	0.693147181	0.693147181	0	0	1.06582391	0.693147181	0.693147181	0	1.554628972	0.833504598	1.524696684	0	0	0	2.422383873	3.076551603	2.401343865	2.327277706	1.835395102	2.151762203	emb|LN590767.1| Cyprinus carpio genome assembly common carp genome ,scaffold 000000187
File_R_cluster_1_biclust_result_1_bclustnum_102014_kamer_1_number_1	emb|LN590705.1| Cyprinus carpio genome assembly common carp genome ,scaffold LG11	5.654308577	5.693264016	5.996578946	1.377326772	1.574347378	1.925290445	0	0.693147181	1.086637543	0	1.058120101	1.337663309	0	0	0.693147181	0.693147181	0	0	0	0.693147181	0.693147181	0	0	0	2.766237345	2.982353171	2.886146176	0	1.377326772	0	emb|LN590705.1| Cyprinus carpio genome assembly common carp genome ,scaffold LG11
File_R_cluster_1_biclust_result_1_bclustnum_10264_kamer_1_number_1	emb|LN590713.1| Cyprinus carpio genome assembly common carp genome ,scaffold LG20	6.852202399	7.294030772	6.990026271	3.694695011	3.535830251	3.595700003	2.647422246	2.318585403	2.155630294	0	1.216395324	1.112797863	0.693147181	0	0	0.693147181	1.09002889	0.693147181	1.076870983	0.899941814	0.693147181	0	0	0	2.391053741	2.454232643	3.262953952	2.8554582	2.693356103	2.750867005	emb|LN590713.1| Cyprinus carpio genome assembly common carp genome ,scaffold LG20
File_R_cluster_1_biclust_result_1_bclustnum_10294_kamer_1_number_1	emb|LN590674.1| Cyprinus carpio genome assembly common carp genome ,scaffold LG42	9.775335949	9.84059035	9.967808863	2.933585556	3.069842031	3.119196916	1.337022706	1.851880435	2.369524791	0.693147181	4.47660814	4.543976465	1.53686722	1.765092033	2.516163039	3.191179807	3.64805746	2.716560552	1.960643929	1.82744027	2.259356037	0.693147181	0	0	6.06435249	5.520023886	5.856174466	2.872903404	2.951163686	2.059885309	emb|LN590674.1| Cyprinus carpio genome assembly common carp genome ,scaffold LG42
File_R_cluster_1_biclust_result_1_bclustnum_103704_kamer_1_number_1	emb|LN590705.1| Cyprinus carpio genome assembly common carp genome ,scaffold LG11	6.725953987	7.101329948	6.77892482	1.220502434	1.54637883	1.625966559	0.693147181	0.693147181	0.693147181	0	1.220502434	1.552279028	0	0	1.023809716	1.909542505	2.478637037	0.693147181	0	1.232723513	1.049821124	1.069626222	0.693147181	0.693147181	0.693147181	1.614978535	1.041452698	0.693147181	0.693147181	0.876713795	emb|LN590705.1| Cyprinus carpio genome assembly common carp genome ,scaffold LG11
File_R_cluster_1_biclust_result_1_bclustnum_10403_kamer_1_number_1	emb|LN590674.1| Cyprinus carpio genome assembly common carp genome ,scaffold LG42	7.425804748	7.355443	7.643094715	3.317721565	4.095209188	3.868762624	2.167939938	2.153812426	1.982344016	0	3.396422668	3.539639613	0	1.570865469	1.359626925	1.379325132	1.501489607	0.693147181	0.693147181	1.479240385	1.324418957	0	0	0	4.553330427	5.129283141	4.333122589	2.587989574	1.683546742	1.393515724	emb|LN590674.1| Cyprinus carpio genome assembly common carp genome ,scaffold LG42
File_R_cluster_1_biclust_result_1_bclustnum_104079_kamer_1_number_1	emb|LN590698.1| Cyprinus carpio genome assembly common carp genome ,scaffold LG17	5.978386906	6.73313519	6.475534406	3.028097813	3.249967432	3.125720522	2.17505054	1.923096164	2.466089037	0	2.460485875	2.595844085	0	0	0.693147181	1.080431346	1.089800243	0.693147181	0	0.693147181	1.076870983	0	0	0	2.645614357	3.408626385	3.537521538	2.423536438	1.897120485	1.824060463	emb|LN590698.1| Cyprinus carpio genome assembly common carp genome ,scaffold LG17
File_R_cluster_1_biclust_result_1_bclustnum_104163_kamer_1_number_1	emb|LN590674.1| Cyprinus carpio genome assembly common carp genome ,scaffold LG42	6.797924788	7.070749595	6.828096081	2.693126055	2.872467993	2.787237158	1.573070565	1.450181889	1.854560544	0	1.34735081	1.474984952	0.693147181	0	0.693147181	1.59163233	2.366300463	0	0.693147181	0.693147181	1.430445209	0	0	0	1.787118718	2.115251396	1.518313361	2.200690785	1.816904012	2.126908211	emb|LN590674.1| Cyprinus carpio genome assembly common carp genome ,scaffold LG42
File_R_cluster_1_biclust_result_1_bclustnum_10478_kamer_1_number_1	emb|LN590674.1| Cyprinus carpio genome assembly common carp genome ,scaffold LG42	6.731432096	7.52811669	7.206614652	3.110252213	3.816685425	3.794139965	2.04035372	2.670922762	2.614962217	0	1.609437912	1.627931841	0	0	0.693147181	1.043043199	1.592631472	0	0.693147181	0.693147181	0.693147181	0	0.693147181	0	3.351071826	4.937153792	4.300274133	1.746296514	2.096535848	1.780585607	emb|LN590674.1| Cyprinus carpio genome assembly common carp genome ,scaffold LG42
File_R_cluster_1_biclust_result_1_bclustnum_104956_kamer_1_number_1	emb|LN590674.1| Cyprinus carpio genome assembly common carp genome ,scaffold LG42	6.895916476	6.852500464	6.949117927	3.749805207	4.927065262	5.260563577	4.159484465	4.207177589	3.860190618	0	3.255134463	3.246689416	0.693147181	1.219755598	1.49231291	2.009761827	2.157559321	1.815856783	0.693147181	0.693147181	1.733051031	0	0	0	4.361627479	5.11684345	4.412331518	2.024119088	1.796023698	2.163912507	emb|LN590674.1| Cyprinus carpio genome assembly common carp genome ,scaffold LG42
File_R_cluster_1_biclust_result_1_bclustnum_10506_kamer_1_number_1	emb|LN590674.1| Cyprinus carpio genome assembly common carp genome ,scaffold LG42	3.474001647	3.791266804	3.777419038	4.448698815	4.672978356	4.668144985	1.880313545	1.580910858	0	0	3.209455593	3.535964261	0.693147181	1.046785519	2.086362536	2.453157951	4.581715257	2.50325397	1.057370067	7.072464308	1.72066439	0.693147181	0	0.693147181	2.012818182	4.88019246	1.55995771	1.057790294	1.132514396	0	emb|LN590674.1| Cyprinus carpio genome assembly common carp genome ,scaffold LG42
File_R_cluster_1_biclust_result_1_bclustnum_1054_kamer_1_number_1	emb|LN590674.1| Cyprinus carpio genome assembly common carp genome ,scaffold LG42	7.003147274	7.155099615	7.045245077	2.391188286	2.675161929	2.751537441	1.798980005	1.382665284	1.692819041	0	2.437928593	2.339573509	0.693147181	0	1.06686359	0.693147181	1.648658626	1.098612289	0.693147181	0.693147181	1.029619417	1.064710737	0	0	4.074585634	3.617165921	4.168797832	2.122001625	1.927101513	1.777160082	emb|LN590674.1| Cyprinus carpio genome assembly common carp genome ,scaffold LG42
File_R_cluster_1_biclust_result_1_bclustnum_105441_kamer_1_number_1	emb|LN590705.1| Cyprinus carpio genome assembly common carp genome ,scaffold LG11	7.414590953	7.243870309	6.139662545	1.844277597	2.060887984	2.539749886	1.474225107	1.860425398	1.093696895	0	2.470089076	2.106641983	1.730798541	1.087052396	0.693147181	1.589894172	2.975529566	2.143735892	0	1.000848769	1.235814436	2.239336406	2.286324605	1.999735236	2.805140614	2.636955122	3.068052935	2.468845016	1.30594619	1.076870983	emb|LN590705.1| Cyprinus carpio genome assembly common carp genome ,scaffold LG11
File_R_cluster_1_biclust_result_1_bclustnum_10624_kamer_1_number_1	emb|LN590713.1| Cyprinus carpio genome assembly common carp genome ,scaffold LG20	7.009679899	7.03593739	6.608927321	4.077789954	3.822782965	4.041478101	3.672325694	3.905433341	3.309560779	0	2.835845172	2.654923648	0.693147181	0	0.693147181	0	0.693147181	0.693147181	0	0	0.693147181	0	0.693147181	0.693147181	4.66947743	4.991044644	4.343417035	1.996965772	1.96909361	1.977392205	emb|LN590713.1| Cyprinus carpio genome assembly common carp genome ,scaffold LG20
File_R_cluster_1_biclust_result_1_bclustnum_106630_kamer_1_number_1	emb|LN590719.1| Cyprinus carpio genome assembly common carp genome ,scaffold LG25	6.701017661	7.005861546	6.798918729	2.948755963	2.736857912	3.488454006	2.379546134	1.857617432	2.02331818	0	1.633796811	1.28482626	0.693147181	1.078202077	0	0	1.645617467	0.693147181	0.693147181	0	0.693147181	0.693147181	0.693147181	0.693147181	2.303954155	2.586838795	2.249646235	2.292949823	2.183238335	3.163160135	emb|LN590719.1| Cyprinus carpio genome assembly common carp genome ,scaffold LG25
File_R_cluster_1_biclust_result_1_bclustnum_106814_kamer_1_number_1	emb|LN591305.1| Cyprinus carpio genome assembly common carp genome ,scaffold 000001301	6.074867756	6.387533987	6.118372491	1.780118644	1.011600912	1.460905421	1.49788493	0.693147181	0.693147181	0	1.098612289	1.016639108	0	0.693147181	0	0	0.693147181	0.693147181	0.693147181	0.693147181	0.693147181	0	0	0	1.016639108	1.522425808	1.470660785	0	0	0.693147181	emb|LN591305.1| Cyprinus carpio genome assembly common carp genome ,scaffold 000001301
File_R_cluster_1_biclust_result_1_bclustnum_107241_kamer_1_number_1	emb|LN590713.1| Cyprinus carpio genome assembly common carp genome ,scaffold LG20	6.555103659	6.598770575	6.831288836	2.55754509	2.465307502	2.517478707	1.639128745	1.79631574	1.592045538	0	2.392901918	2.28601049	0	0	0	1.078810861	1.600703882	1.022900467	0	1.103888346	0.693147181	0.693147181	0	0.693147181	2.18034062	3.050376697	2.21233101	2.845310466	2.438382666	2.052568679	emb|LN590713.1| Cyprinus carpio genome assembly common carp genome ,scaffold LG20
File_R_cluster_1_biclust_result_1_bclustnum_107328_kamer_1_number_1	emb|LN590674.1| Cyprinus carpio genome assembly common carp genome ,scaffold LG42	5.914070412	5.887336605	6.02973529	0.980830503	1.249185147	0.966303006	0	0	0.693147181	0	2.395648205	2.728414762	0.693147181	0	0	0.693147181	1.581787129	0	0	0	0.693147181	0	0	0	1.714799228	1.233172319	1.181500176	0	0.693147181	0.693147181	emb|LN590674.1| Cyprinus carpio genome assembly common carp genome ,scaffold LG42
File_R_cluster_1_biclust_result_1_bclustnum_107825_kamer_1_number_1	emb|LN590674.1| Cyprinus carpio genome assembly common carp genome ,scaffold LG42	7.987677321	8.074698887	7.939308539	3.205454156	2.193902398	2.153261079	1.531476371	1.341663037	1.660296412	0	1.165750553	0.693147181	0	0	0	0.693147181	0.693147181	0	0	0.906406039	1.088140989	0	0	0	2.968212042	2.10340584	2.330548448	1.602965008	2.029844177	1.563224326	emb|LN590674.1| Cyprinus carpio genome assembly common carp genome ,scaffold LG42
File_R_cluster_1_biclust_result_1_bclustnum_1086_kamer_1_number_1	emb|LN590674.1| Cyprinus carpio genome assembly common carp genome ,scaffold LG42	7.684370065	7.913773363	7.642538523	4.503781771	4.105968409	4.03595598	2.529895949	2.960027373	2.841082302	0	3.590541445	3.326858101	1.540445755	1.589894172	1.561647948	2.842656849	3.702984508	3.294836366	1.304696486	1.794244712	2.636747521	1.064710737	1.866661293	1.740466175	4.947276521	5.189216531	4.955615768	1.764014787	2.161778155	0.889059299	emb|LN590674.1| Cyprinus carpio genome assembly common carp genome ,scaffold LG42
File_R_cluster_1_biclust_result_1_bclustnum_109356_kamer_1_number_1	emb|LN592354.1| Cyprinus carpio genome assembly common carp genome ,scaffold 000008356	2.253394849	2.197224577	2.337952237	2.514465452	2.27298428	1.736951233	1.30933232	1.08462492	1.568615918	7.176193368	0.693147181	1.070442555	0	0	0	0	0	0.693147181	0	0	0	0.693147181	2.164280039	1.08462492	1.386294361	0.693147181	0.820145403	3.163282773	3.127409448	2.778359539	emb|LN592354.1| Cyprinus carpio genome assembly common carp genome ,scaffold 000008356
File_R_cluster_1_biclust_result_1_bclustnum_109621_kamer_1_number_1	emb|LN590674.1| Cyprinus carpio genome assembly common carp genome ,scaffold LG42	3.676885311	3.686955104	3.248582189	3.419652697	3.616134015	3.381395954	3.979948908	3.410919964	3.678106635	0	1.264279258	1.409605532	0	0	0	0	0	0	1.06686359	0.693147181	1.05977097	0	0	0	7.113280536	6.846321267	7.156784877	2.776611869	2.817914559	2.819275485	emb|LN590674.1| Cyprinus carpio genome assembly common carp genome ,scaffold LG42
File_R_cluster_1_biclust_result_1_bclustnum_10971_kamer_1_number_1	emb|LN590674.1| Cyprinus carpio genome assembly common carp genome ,scaffold LG42	6.403756301	6.592405974	6.373249821	2.152080757	1.315343324	1.032550831	0.870828823	1.791759469	0.693147181	0	2.394151912	1.775648719	1.037987875	0	0.693147181	0.693147181	1.275069461	0.693147181	1.236761337	0.693147181	0	0	0.693147181	0	2.298466624	2.45829741	3.147925324	0	1.022745848	0	emb|LN590674.1| Cyprinus carpio genome assembly common carp genome ,scaffold LG42
File_R_cluster_1_biclust_result_1_bclustnum_109939_kamer_1_number_1	emb|LN590705.1| Cyprinus carpio genome assembly common carp genome ,scaffold LG11	5.860093676	6.344639373	6.174741897	0	0.693147181	0	0	0	0	0	0.910389353	0.942959926	0	0	0.693147181	0	0.693147181	0	0	0	0.693147181	0	0	0	2.268217226	2.459819584	2.504970681	0	0	0	emb|LN590705.1| Cyprinus carpio genome assembly common carp genome ,scaffold LG11
File_R_cluster_1_biclust_result_1_bclustnum_11039_kamer_1_number_1	emb|LN590674.1| Cyprinus carpio genome assembly common carp genome ,scaffold LG42	5.363805437	5.476342206	7.112123675	3.584135415	3.300120272	3.265870092	2.6437321	2.514230797	1.831367928	0	1.078810861	1.742243542	0	0	0	0	0	0	1.072121143	0	1.725913427	0	0	0	2.320785457	2.650548199	2.654346988	2.214986998	2.660469305	2.34703729	emb|LN590674.1| Cyprinus carpio genome assembly common carp genome ,scaffold LG42
File_R_cluster_1_biclust_result_1_bclustnum_11082_kamer_1_number_1	emb|LN599314.1| Cyprinus carpio genome assembly common carp genome ,scaffold 000003260	6.164015611	6.438062002	6.149388812	2.290006311	2.575577296	2.445966564	1.909542505	1.443645395	2.43482315	0	1.697142882	1.335001067	0	0	0	1.046785519	0	1.06686359	0.693147181	0.693147181	0.693147181	0	0	0	1.789441785	2.313634819	1.78479024	2.823020396	1.567177384	2.459332399	emb|LN599314.1| Cyprinus carpio genome assembly common carp genome ,scaffold 000003260
File_R_cluster_1_biclust_result_1_bclustnum_111050_kamer_1_number_1	emb|LN590674.1| Cyprinus carpio genome assembly common carp genome ,scaffold LG42	5.82795395	6.039880832	5.882583954	3.320952153	3.146434156	3.121249765	2.492907888	2.63905733	1.990126604	0	2.403353079	2.69021883	0	0	0	0.693147181	0	0.693147181	0.910023131	0.869899089	0.693147181	0	0	0	3.560497637	4.143134726	3.85628194	2.944438979	1.627189418	2.876385516	emb|LN590674.1| Cyprinus carpio genome assembly common carp genome ,scaffold LG42
File_R_cluster_1_biclust_result_1_bclustnum_111596_kamer_1_number_1	emb|LN590713.1| Cyprinus carpio genome assembly common carp genome ,scaffold LG20	8.83288967	8.823438889	8.905527061	3.367809491	3.584349149	3.69890404	2.231457444	2.816390273	2.281467682	0	1.809022928	1.535100068	2.079441542	2.607964637	2.71034756	0	0.693147181	0	0.693147181	0	1.093623197	3.704496865	3.713572067	3.928917487	2.507051304	3.122431002	2.043350526	3.067010532	2.678319251	3.000943671	emb|LN590713.1| Cyprinus carpio genome assembly common carp genome ,scaffold LG20
File_R_cluster_1_biclust_result_1_bclustnum_112124_kamer_1_number_1	emb|LN590674.1| Cyprinus carpio genome assembly common carp genome ,scaffold LG42	6.63622998	6.699683821	6.898482419	2.013100063	1.245010136	1.528856726	0.693147181	1.59856906	0	0	1.612136269	2.360343493	0.693147181	0	1.041452698	1.32175584	1.365816106	1.016935747	0	0.693147181	1.355417541	0.693147181	0	0	2.865287541	2.191200916	2.459819584	1.312187543	0.693147181	1.045123604	emb|LN590674.1| Cyprinus carpio genome assembly common carp genome ,scaffold LG42
File_R_cluster_1_biclust_result_1_bclustnum_112259_kamer_1_number_1	emb|LN590674.1| Cyprinus carpio genome assembly common carp genome ,scaffold LG42	6.302644616	6.103917849	6.316261752	1.386294361	1.264934311	0.928713252	1.346216881	1.382863482	0.693147181	0	0.693147181	0.693147181	0	0.693147181	0	0.693147181	1.507075121	1.363987401	0	1.079918646	0.693147181	0	0	0	2.103131212	2.691473565	1.742626996	0.693147181	0.693147181	0.693147181	emb|LN590674.1| Cyprinus carpio genome assembly common carp genome ,scaffold LG42
File_R_cluster_1_biclust_result_1_bclustnum_1125_kamer_1_number_1	emb|LN590674.1| Cyprinus carpio genome assembly common carp genome ,scaffold LG42	6.460847671	6.307424262	6.617402978	3.630712591	2.144087479	2.114768868	1.086637543	0	0	0	2.665135741	2.397895273	0	0	0	1.011600912	0.693147181	0.693147181	0.693147181	0.693147181	0	0	0	0.693147181	3.620865568	3.609064845	3.678897298	0.693147181	1.098612289	0	emb|LN590674.1| Cyprinus carpio genome assembly common carp genome ,scaffold LG42
File_R_cluster_1_biclust_result_1_bclustnum_11254_kamer_1_number_1	emb|LN590698.1| Cyprinus carpio genome assembly common carp genome ,scaffold LG17	0	0	0	0.693147181	0	0	0	0	0	7.150787728	0	0	0	0	0	0	0	0	0	0	0	0	0	0	0	0	0.693147181	0	0	0	emb|LN590698.1| Cyprinus carpio genome assembly common carp genome ,scaffold LG17
File_R_cluster_1_biclust_result_1_bclustnum_11305_kamer_1_number_1	emb|LN590705.1| Cyprinus carpio genome assembly common carp genome ,scaffold LG11	6.556458703	6.549045409	6.747371715	1.335001067	1.547562509	2.010197299	0.693147181	0.693147181	0.693147181	0	1.35644064	1.890053073	0.693147181	0.693147181	0	1.348836493	0.693147181	1.371480171	0.693147181	0.693147181	0.881405248	0	0	0	1.396801468	2.154052602	1.566265241	0	1.297463147	1.35812377	emb|LN590705.1| Cyprinus carpio genome assembly common carp genome ,scaffold LG11
File_R_cluster_1_biclust_result_1_bclustnum_1138_kamer_1_number_1	emb|LN590698.1| Cyprinus carpio genome assembly common carp genome ,scaffold LG17	0	0	0	0	0	0	0	0	0	7.361413548	0	0	0	0	0	0	0	0	0	0	0	0	0	0	0	0	1.098612289	0	0	0	emb|LN590698.1| Cyprinus carpio genome assembly common carp genome ,scaffold LG17
File_R_cluster_1_biclust_result_1_bclustnum_11404_kamer_1_number_1	emb|LN590674.1| Cyprinus carpio genome assembly common carp genome ,scaffold LG42	6.633460528	6.586861072	6.73927272	3.685935124	2.932835071	3.248434627	2.104134154	2.043324607	2.647946277	0	1.644631296	1.344448405	0	0	0	0.693147181	1.078202077	0	0	0	0.693147181	0.693147181	0	0.693147181	2.111032259	2.79678731	2.06818467	2.610518222	2.869074347	2.164739264	emb|LN590674.1| Cyprinus carpio genome assembly common carp genome ,scaffold LG42
File_R_cluster_1_biclust_result_1_bclustnum_115_kamer_1_number_1	emb|LN591305.1| Cyprinus carpio genome assembly common carp genome ,scaffold 000001301	4.850184812	4.771607927	4.784152842	3.529030487	7.385063415	7.350304203	5.284400981	5.205203772	3.078569534	0	0	0	0	0	0	0	0	0	0.693147181	0	0	0	0	0	4.224575723	8.981757052	4.262936182	3.703768067	3.684324094	3.526360525	emb|LN591305.1| Cyprinus carpio genome assembly common carp genome ,scaffold 000001301
File_R_cluster_1_biclust_result_1_bclustnum_1164_kamer_1_number_1	emb|LN590674.1| Cyprinus carpio genome assembly common carp genome ,scaffold LG42	8.919287291	9.269891477	8.555199706	5.476714566	6.040752207	5.98412518	5.438079309	5.588199517	5.58282315	0	4.755261208	4.328570477	3.424454819	3.543026751	2.863879471	4.25668731	5.545443034	4.691081792	2.811021866	2.906004483	3.476867466	4.515245478	4.510859507	4.390325851	5.591266792	5.711416594	5.635535753	4.341670677	3.892734166	4.268339885	emb|LN590674.1| Cyprinus carpio genome assembly common carp genome ,scaffold LG42
File_R_cluster_1_biclust_result_1_bclustnum_11665_kamer_1_number_1	emb|LN591305.1| Cyprinus carpio genome assembly common carp genome ,scaffold 000001301	5.907694276	5.800304042	5.997623045	1.284895432	0.875468737	1.054649952	0	1.198243423	1.212631212	0	0	0.693147181	0	0.693147181	0	1.736329561	1.339773869	0.693147181	0.693147181	0	0.693147181	0	0	0	2.044923852	3.464394378	2.114532344	0	1.640382162	0.693147181	emb|LN591305.1| Cyprinus carpio genome assembly common carp genome ,scaffold 000001301
File_R_cluster_1_biclust_result_1_bclustnum_11672_kamer_1_number_1	emb|LN590705.1| Cyprinus carpio genome assembly common carp genome ,scaffold LG11	6.720513236	6.640380282	6.256078203	0.693147181	1.256837513	1.276956502	0.693147181	0	0	0	0.693147181	1.357305721	1.301953053	0	0.693147181	1.34117408	1.645617467	1.378690525	0	0.693147181	1.745238977	0	0	0	0.893071234	1.847329771	1.425375641	1.117479838	1.086637543	0.693147181	emb|LN590705.1| Cyprinus carpio genome assembly common carp genome ,scaffold LG11
File_R_cluster_1_biclust_result_1_bclustnum_117214_kamer_1_number_1	emb|LN590705.1| Cyprinus carpio genome assembly common carp genome ,scaffold LG11	6.64268626	6.784708162	7.062457235	1.4663363	1.260668778	1.900563051	0.693147181	0.693147181	0.693147181	0	1.34735081	1.852384091	0	0	0.693147181	1.32175584	1.540445755	0.693147181	0.693147181	0	1.044008257	0	0	0	1.216931477	1.53746489	0.870828823	1.750697863	1.064710737	1.377326772	emb|LN590705.1| Cyprinus carpio genome assembly common carp genome ,scaffold LG11
File_R_cluster_1_biclust_result_1_bclustnum_117338_kamer_1_number_1	emb|LN591055.1| Cyprinus carpio genome assembly common carp genome ,scaffold 000001389	6.150310615	6.509680793	6.170838013	3.283726797	3.681036277	3.773622636	2.383012342	1.719597295	2.373115315	0	2.315007613	1.787584098	0.693147181	0	0.693147181	0	1.079918646	0.693147181	0.693147181	0.693147181	0	0	0	0	3.666442109	3.751854253	4.253305085	2.388762789	2.053238727	2.056451791	emb|LN591055.1| Cyprinus carpio genome assembly common carp genome ,scaffold 000001389
File_R_cluster_1_biclust_result_1_bclustnum_117497_kamer_1_number_1	emb|LN590705.1| Cyprinus carpio genome assembly common carp genome ,scaffold LG11	6.158976988	6.355359117	6.082757578	1.268512575	1.343733877	0	0.693147181	0	0	0	0.880356771	0.693147181	0	0	0.693147181	1.362577835	0.693147181	1.098612289	0.693147181	0	0.693147181	0	0	0	1.232723513	1.858899292	2.005601226	0.693147181	0.693147181	0.693147181	emb|LN590705.1| Cyprinus carpio genome assembly common carp genome ,scaffold LG11
File_R_cluster_1_biclust_result_1_bclustnum_118043_kamer_1_number_1	emb|LN590674.1| Cyprinus carpio genome assembly common carp genome ,scaffold LG42	10.5619087	10.62105658	10.74802661	6.679509986	7.501805619	7.228780247	6.956764467	6.890565376	5.948854497	0	7.559736656	7.591341903	2.410802524	2.513890853	2.421540774	3.89921331	4.915034405	2.942890412	3.137973748	2.255793231	3.195169026	1.92402673	1.584120104	0.693147181	7.487134478	7.284162259	7.64768585	3.921690128	3.659890814	3.081253791	emb|LN590674.1| Cyprinus carpio genome assembly common carp genome ,scaffold LG42
File_R_cluster_1_biclust_result_1_bclustnum_1181_kamer_1_number_1	emb|LN590705.1| Cyprinus carpio genome assembly common carp genome ,scaffold LG11	5.609471795	5.611169986	9.6064014	3.089063223	3.213565751	3.214229045	2.847272868	3.132969292	2.021334295	0	0.693147181	1.311069612	0	0	0	0	0.693147181	0	0.693147181	1.361804415	0.693147181	0	0	0	2.559356825	3.259211301	2.8459205	1.730798541	1.391383887	1.770019867	emb|LN590705.1| Cyprinus carpio genome assembly common carp genome ,scaffold LG11
File_R_cluster_1_biclust_result_1_bclustnum_119653_kamer_1_number_1	emb|LN598471.1| Cyprinus carpio genome assembly common carp genome ,scaffold 000000136	0	0	0	0	0	0	0	0	0	7.914993963	0	0	0	0	0	0	0	0	0	0	0	0	0	0	0	0	0	0	0	0	emb|LN598471.1| Cyprinus carpio genome assembly common carp genome ,scaffold 000000136
File_R_cluster_1_biclust_result_1_bclustnum_12212_kamer_1_number_1	emb|LN590705.1| Cyprinus carpio genome assembly common carp genome ,scaffold LG11	6.710074775	6.667237923	6.356236125	0.693147181	0.693147181	1.490920107	0.693147181	1.214215172	0.693147181	0	0	0	1.029619417	0	0	1.36330461	1.472235791	0.693147181	0.693147181	0.693147181	0.889059299	1.088140989	0.693147181	0	1.443451803	2.468845016	0.910389353	0.693147181	0	0.693147181	emb|LN590705.1| Cyprinus carpio genome assembly common carp genome ,scaffold LG11
File_R_cluster_1_biclust_result_1_bclustnum_123013_kamer_1_number_1	emb|LN590674.1| Cyprinus carpio genome assembly common carp genome ,scaffold LG42	6.103182561	6.263986661	6.069309457	2.749345684	1.494224572	2.223032015	1.761906607	1.47758511	1.363987401	0	1.683125082	2.049589109	0	0	0.693147181	1.08780072	1.886348177	1.602749595	1.076138296	0.693147181	0.693147181	1.076138296	0	2.041220329	2.684242364	1.976936667	2.292237743	0.886437526	1.710081119	1.098612289	emb|LN590674.1| Cyprinus carpio genome assembly common carp genome ,scaffold LG42
File_R_cluster_1_biclust_result_1_bclustnum_1232_kamer_1_number_1	emb|LN590706.1| Cyprinus carpio genome assembly common carp genome ,scaffold LG36	1.572773928	1.226172556	1.252762968	2.19310053	1.365241803	1.697730801	0.693147181	0.693147181	0	6.493803763	0.693147181	0	0	0	0	0	0	0	0	0	0	0.693147181	1.30252409	1.191164122	1.584120104	1.071583616	1.375822219	0.693147181	1.098612289	1.365241803	emb|LN590706.1| Cyprinus carpio genome assembly common carp genome ,scaffold LG36
File_R_cluster_1_biclust_result_1_bclustnum_123408_kamer_1_number_1	emb|LN590702.1| Cyprinus carpio genome assembly common carp genome ,scaffold LG50	6.385383251	6.463905828	6.213857817	3.610917913	2.590901964	3.103622088	1.74469232	1.583795949	1.910818727	0	1.933331367	2.114748356	0	0	0	0.693147181	1.543923982	0	0	1.098612289	0.693147181	0	0	0	3.525256975	3.312821438	3.754784229	2.364889245	1.869146346	2.579724284	emb|LN590702.1| Cyprinus carpio genome assembly common carp genome ,scaffold LG50
File_R_cluster_1_biclust_result_1_bclustnum_12537_kamer_1_number_1	emb|LN590674.1| Cyprinus carpio genome assembly common carp genome ,scaffold LG42	6.09212403	6.336330033	6.255314246	3.310769265	2.817400746	2.678278043	2.284235769	2.397895273	2.151762203	0	1.475524733	1.627456597	0	0	0	0	0	0.693147181	0	0	1.020358813	0	0	0	3.518882635	3.078845647	3.506556897	1.701105101	2.116620508	2.038433332	emb|LN590674.1| Cyprinus carpio genome assembly common carp genome ,scaffold LG42
File_R_cluster_1_biclust_result_1_bclustnum_1255_kamer_1_number_1	emb|LN590674.1| Cyprinus carpio genome assembly common carp genome ,scaffold LG42	6.919762898	6.811515267	6.087649344	2.679966178	3.504400572	3.694250007	0.693147181	1.316089148	1.662548255	0	2.14817788	2.294863357	0.693147181	0	0	0	1.386294361	0	0	0	0.693147181	0	0	0	2.426067412	3.026785105	2.438993593	1.779783037	1.945910149	1.749199855	emb|LN590674.1| Cyprinus carpio genome assembly common carp genome ,scaffold LG42
File_R_cluster_1_biclust_result_1_bclustnum_12611_kamer_1_number_1	emb|LN590674.1| Cyprinus carpio genome assembly common carp genome ,scaffold LG42	6.032846385	6.015852235	6.065964228	1.898369204	0.693147181	1.060391076	0	0.693147181	1.086637543	0	2.819144249	2.832477779	0	0	0	0	1.332806555	1.081371178	0	0	0.693147181	0	0	0	2.066862759	0.693147181	1.542229163	1.662978679	0.979265531	0	emb|LN590674.1| Cyprinus carpio genome assembly common carp genome ,scaffold LG42
File_R_cluster_1_biclust_result_1_bclustnum_126251_kamer_1_number_1	emb|LN590705.1| Cyprinus carpio genome assembly common carp genome ,scaffold LG11	6.765652399	7.279897978	7.003656193	1.098612289	1.377326772	1.343733877	0.693147181	0.693147181	0.860718824	0	1.895853683	1.596699117	0.693147181	0	0	0	1.360976553	1.32175584	0	0.839750882	0	0	0	0	2.209802915	1.482195275	2.625400209	0	0	0.693147181	emb|LN590705.1| Cyprinus carpio genome assembly common carp genome ,scaffold LG11
File_R_cluster_1_biclust_result_1_bclustnum_127563_kamer_1_number_1	emb|LN590674.1| Cyprinus carpio genome assembly common carp genome ,scaffold LG42	8.261177731	8.170494038	8.403762421	4.206629548	4.469037699	4.316448907	1.248671754	2.305178727	1.945910149	0	4.430507227	4.188079259	0.928973959	0.693147181	0	1.089561453	1.071943141	1.681758574	1.089043318	0.911012828	1.573172189	0.693147181	0.693147181	0.693147181	5.415811472	5.797752363	5.300719479	1.895802618	1.904555274	2.419692345	emb|LN590674.1| Cyprinus carpio genome assembly common carp genome ,scaffold LG42
File_R_cluster_1_biclust_result_1_bclustnum_12807_kamer_1_number_1	emb|LN590674.1| Cyprinus carpio genome assembly common carp genome ,scaffold LG42	5.721484859	5.721000064	6.098047316	3.215233199	2.057323736	3.392065816	2.028148247	2.094945728	1.926009145	0	1.329136536	1.248895499	0	0.693147181	0	0	0	0.693147181	1.370546004	0.693147181	1.006237463	0	0	0	2.754679302	2.863257465	2.587764035	2.494955986	2.107276772	2.305912551	emb|LN590674.1| Cyprinus carpio genome assembly common carp genome ,scaffold LG42
File_R_cluster_1_biclust_result_1_bclustnum_128860_kamer_1_number_1	emb|LN590674.1| Cyprinus carpio genome assembly common carp genome ,scaffold LG42	6.160405312	5.893744215	6.266479226	1.308735441	1.554628972	1.674856671	1.024502778	1.03471001	0.693147181	0	0	0.693147181	0	1.031920339	0.693147181	0	1.643149246	0.693147181	0.693147181	0	0	0	0	0	1.041452698	2.649064236	0.693147181	0.693147181	0.693147181	0.693147181	emb|LN590674.1| Cyprinus carpio genome assembly common carp genome ,scaffold LG42
File_R_cluster_1_biclust_result_1_bclustnum_12909_kamer_1_number_1	emb|LN590674.1| Cyprinus carpio genome assembly common carp genome ,scaffold LG42	5.91398127	6.620410483	6.128084602	1.588530876	1.434458139	1.920069127	0.693147181	0	1.098612289	0	1.163941122	0.693147181	0	0.693147181	0	0.693147181	1.766070652	0	0	0	0	0	0	0	2.864004967	3.643895163	4.03345626	1.587777	0.693147181	1.087052396	emb|LN590674.1| Cyprinus carpio genome assembly common carp genome ,scaffold LG42
File_R_cluster_1_biclust_result_1_bclustnum_129573_kamer_1_number_1	emb|LN590698.1| Cyprinus carpio genome assembly common carp genome ,scaffold LG17	0	0	0.693147181	0	0	0	0	0.693147181	0	6.94002884	0	0	0	0	0	0	0	0	0	0	0	0	0	0	0	0	0	0	0	0	emb|LN590698.1| Cyprinus carpio genome assembly common carp genome ,scaffold LG17
File_R_cluster_1_biclust_result_1_bclustnum_129811_kamer_1_number_1	emb|LN590688.1| Cyprinus carpio genome assembly common carp genome ,scaffold LG48	5.015158383	5.018748956	5.205626254	4.760702768	5.135062872	5.06536335	3.791582692	3.864698666	3.839202819	0	2.70462434	2.717531775	0	0	0	0	0	0	1.501070659	1.809150695	1.598263713	0	0	0	4.57164546	6.155653956	4.629862799	4.552273502	4.478545175	4.36462612	emb|LN590688.1| Cyprinus carpio genome assembly common carp genome ,scaffold LG48
File_R_cluster_1_biclust_result_1_bclustnum_129903_kamer_1_number_1	emb|LN590686.1| Cyprinus carpio genome assembly common carp genome ,scaffold LG35	7.790869713	8.060824187	7.89759011	6.891098319	6.294832328	6.161920148	4.875609452	5.017279837	4.291493153	2.954910279	4.850904631	4.928730854	0.693147181	0	0.693147181	1.029619417	0	0	2.692015666	3.159151298	3.060269232	1.059393176	0.693147181	0.693147181	6.376570473	6.092838125	6.490599096	4.969125563	4.926514281	4.522920545	emb|LN590686.1| Cyprinus carpio genome assembly common carp genome ,scaffold LG35
File_R_cluster_1_biclust_result_1_bclustnum_131823_kamer_1_number_1	emb|LN590719.1| Cyprinus carpio genome assembly common carp genome ,scaffold LG25	6.623652128	6.792859446	7.108023166	2.945170291	2.712546743	2.771744616	1.457986919	2.341805806	2.551279425	0	1.553868118	1.875952016	0.693147181	0	0.693147181	0	0.693147181	0	0.693147181	0.693147181	0.845340231	0.693147181	1.077558879	0	2.568059899	2.555419477	2.954347621	2.783306086	2.389017803	2.884979468	emb|LN590719.1| Cyprinus carpio genome assembly common carp genome ,scaffold LG25
File_R_cluster_1_biclust_result_1_bclustnum_132248_kamer_1_number_1	emb|LN590674.1| Cyprinus carpio genome assembly common carp genome ,scaffold LG42	6.343498991	6.443024126	5.584311766	2.425183184	2.665615796	2.537831113	1.386294361	0.693147181	0.693147181	0	2.277638498	1.7598542	0.693147181	1.046785519	1.29340026	1.076870983	2.321842474	0.693147181	0.693147181	0	0.693147181	2.645947821	2.328063738	2.569898628	2.790545284	1.221213329	2.511126551	1.767307953	1.462986848	1.028583166	emb|LN590674.1| Cyprinus carpio genome assembly common carp genome ,scaffold LG42
File_R_cluster_1_biclust_result_1_bclustnum_132270_kamer_1_number_1	emb|LN590674.1| Cyprinus carpio genome assembly common carp genome ,scaffold LG42	6.856949234	7.329290567	6.963142681	2.784708727	3.527224857	3.698394046	1.804028891	2.564949357	2.493205453	0	2.508012639	2.383377673	0	0	0.693147181	0.693147181	1.96398299	0.693147181	0.96009324	0.911398786	1.369486395	0.693147181	0	0.693147181	2.735315112	2.269120342	3.243451357	2.406656778	2.285539641	2.739800774	emb|LN590674.1| Cyprinus carpio genome assembly common carp genome ,scaffold LG42
File_R_cluster_1_biclust_result_1_bclustnum_132350_kamer_1_number_1	emb|LN591055.1| Cyprinus carpio genome assembly common carp genome ,scaffold 000001389	6.110056145	6.644972627	6.252805211	3.253087862	3.400763954	3.507855056	2.359383109	1.373221786	1.545072176	0	2.181223913	1.662548255	0	0	0	0.693147181	1.050985947	0	0	0	1.023809716	0	0	0	3.425994054	2.978046803	3.957468535	1.098612289	1.45395301	1.089917935	emb|LN591055.1| Cyprinus carpio genome assembly common carp genome ,scaffold 000001389
File_R_cluster_1_biclust_result_1_bclustnum_132721_kamer_1_number_1	emb|LN590705.1| Cyprinus carpio genome assembly common carp genome ,scaffold LG11	6.501821061	6.532204735	6.985327245	2.721459888	2.483847756	2.441799059	2.168692492	1.750848929	1.29003398	0	1.420512196	1.36687706	0	0	0.693147181	0	0	0	0	0	0	0	0.693147181	0	3.125540494	3.732231047	3.608864454	1.567177384	1.5518088	0.869899089	emb|LN590705.1| Cyprinus carpio genome assembly common carp genome ,scaffold LG11
File_R_cluster_1_biclust_result_1_bclustnum_13281_kamer_1_number_1	emb|LN590674.1| Cyprinus carpio genome assembly common carp genome ,scaffold LG42	6.598469518	6.736199166	7.495547499	3.810902378	3.664691777	3.604937906	3.622771702	3.580246925	2.55700248	0	2.366663508	1.981001469	1.517063818	1.098612289	1.386294361	1.098612289	1.710081119	0.693147181	1.006237463	0.693147181	0.693147181	0.693147181	0.693147181	0.693147181	3.452783633	5.022721955	2.889554758	2.254382806	1.987874348	2.338595852	emb|LN590674.1| Cyprinus carpio genome assembly common carp genome ,scaffold LG42
File_R_cluster_1_biclust_result_1_bclustnum_133916_kamer_1_number_1	emb|LN590674.1| Cyprinus carpio genome assembly common carp genome ,scaffold LG42	7.141640927	6.942388563	5.56527874	3.396375776	3.472106194	3.589959266	2.752354127	2.231584135	2.497485536	0	2.232475884	2.108649554	2.187722912	2.397895273	1.681758574	1.391488349	2.452409284	2.030049071	1.319732461	1.220502434	1.778687739	2.810179502	2.708050201	2.547975341	3.734908668	3.188185663	2.833213344	2.151762203	1.93874166	2.733529496	emb|LN590674.1| Cyprinus carpio genome assembly common carp genome ,scaffold LG42
File_R_cluster_1_biclust_result_1_bclustnum_133951_kamer_1_number_1	emb|LN590705.1| Cyprinus carpio genome assembly common carp genome ,scaffold LG11	5.994412697	6.21812989	6.220176566	1.491653877	1.85020289	1.773741449	1.525451773	1.212271277	1.075353897	0	1.220502434	1.216395324	0	0	0	0	0.693147181	0.693147181	0	0.899482258	0.693147181	0	0	0	1.925869236	2.581897235	1.684339427	1.762603536	1.32175584	0	emb|LN590705.1| Cyprinus carpio genome assembly common carp genome ,scaffold LG11
File_R_cluster_1_biclust_result_1_bclustnum_134_kamer_1_number_1	emb|LN590713.1| Cyprinus carpio genome assembly common carp genome ,scaffold LG20	6.774011292	6.672702342	6.329924093	3.448542057	2.301155071	2.455915436	1.987874348	1.745465936	1.768502784	0	1.335001067	1.054810164	0.693147181	0	1.323775133	1.386294361	1.355523249	0	0.693147181	0	0.919565364	0	0	0	2.001916391	2.135011055	1.913366296	1.511220711	1.56264605	2.145398978	emb|LN590713.1| Cyprinus carpio genome assembly common carp genome ,scaffold LG20
File_R_cluster_1_biclust_result_1_bclustnum_1341_kamer_1_number_1	emb|LN590713.1| Cyprinus carpio genome assembly common carp genome ,scaffold LG20	8.136105524	8.188528	8.249261457	5.204231936	4.290600527	4.053862788	3.925841094	3.606451195	3.292817497	0	4.525144895	4.578742018	0	1.487270278	0.993251773	2.230398197	3.33220451	1.867471274	1.053151077	1.683717584	1.770437088	2.140066163	1.842815319	2.200585589	5.622677258	4.846373671	5.703885803	3.011905775	2.797866529	2.809697833	emb|LN590713.1| Cyprinus carpio genome assembly common carp genome ,scaffold LG20
File_R_cluster_1_biclust_result_1_bclustnum_134154_kamer_1_number_1	emb|LN590702.1| Cyprinus carpio genome assembly common carp genome ,scaffold LG50	6.041106729	6.113790581	5.729498953	3.64083089	3.151996433	3.381667917	1.665345544	2.728414762	1.889397241	0	1.413693065	2.370589476	0	0	0.693147181	1.32525903	1.081371178	0	0.693147181	0.854691886	1.08180517	0.693147181	0	0	3.419142075	3.657210753	3.864751088	2.65792815	2.499171094	2.465103522	emb|LN590702.1| Cyprinus carpio genome assembly common carp genome ,scaffold LG50
File_R_cluster_1_biclust_result_1_bclustnum_135249_kamer_1_number_1	emb|LN590674.1| Cyprinus carpio genome assembly common carp genome ,scaffold LG42	7.260178196	7.520955164	7.214916397	2.840726228	2.870225738	2.886804291	2.126643541	2.207146305	1.133551413	0	2.302585093	2.757246632	0	0.693147181	1.061910268	0	1.069626222	0.693147181	0	0	0	0	0	0	4.597706401	4.056900536	4.976381956	0	1.47590652	1.707676527	emb|LN590674.1| Cyprinus carpio genome assembly common carp genome ,scaffold LG42
File_R_cluster_1_biclust_result_1_bclustnum_13700_kamer_1_number_1	emb|LN590705.1| Cyprinus carpio genome assembly common carp genome ,scaffold LG11	5.703555782	5.909880235	6.104250675	0.693147181	2.40157033	1.959332522	0.860718824	0	0.693147181	0	0.921680183	0.872083848	0.693147181	0	0.693147181	0	0.693147181	0	0	0	0	0	0	0	2.514861814	2.462124087	2.338421239	0.693147181	0.88332116	0.693147181	emb|LN590705.1| Cyprinus carpio genome assembly common carp genome ,scaffold LG11
File_R_cluster_1_biclust_result_1_bclustnum_137622_kamer_1_number_1	emb|LN596092.1| Cyprinus carpio genome assembly common carp genome ,scaffold 000003000	6.617913543	6.684565477	6.961419261	5.599306753	5.418954104	5.309094089	4.937189667	4.384918699	5.135533696	2.197224577	2.884934782	3.074062747	0.693147181	0.693147181	0.693147181	0	1.049821124	0.693147181	2.072273412	1.747588122	2.074743021	0	0.693147181	0.693147181	4.687781899	4.639417011	4.828425731	5.277461385	5.306652532	5.229594102	emb|LN596092.1| Cyprinus carpio genome assembly common carp genome ,scaffold 000003000
File_R_cluster_1_biclust_result_1_bclustnum_138114_kamer_1_number_1	emb|LN598497.1| Cyprinus carpio genome assembly common carp genome ,scaffold 000002514	6.256089715	6.098586511	6.022098014	3.019683148	3.180575648	3.319133744	2.017199049	2.152466606	1.574347378	0	1.654000104	1.087052396	0	0.693147181	0	0	0.693147181	0	1.098612289	0	0.916290732	0	0	0	3.397393489	3.109288612	3.462565257	2.190029868	1.518784274	2.335374593	emb|LN598497.1| Cyprinus carpio genome assembly common carp genome ,scaffold 000002514
File_R_cluster_1_biclust_result_1_bclustnum_139144_kamer_1_number_1	emb|LN590674.1| Cyprinus carpio genome assembly common carp genome ,scaffold LG42	6.343421629	6.482308868	6.186297097	2.699056546	2.50048468	3.12888547	1.907930836	1.646427292	1.782050826	0	1.505687211	1.638011764	0	0.693147181	0	1.786188983	2.354347028	1.814032898	0	0.902869063	1.582409925	0	0	0	3.857520356	4.46557473	4.138292865	1.827350205	2.164964207	2.827502953	emb|LN590674.1| Cyprinus carpio genome assembly common carp genome ,scaffold LG42
File_R_cluster_1_biclust_result_1_bclustnum_13989_kamer_1_number_1	emb|LN590674.1| Cyprinus carpio genome assembly common carp genome ,scaffold LG42	6.945147398	6.607132502	5.508290568	1.389910316	1.436483546	1.983952971	0.693147181	1.854937691	0.693147181	0	1.353623948	1.461932769	0.693147181	0.693147181	1.523496508	1.776491843	2.045993336	1.504077397	0	0	1.280933845	0	1.088460938	1.359144106	3.795810486	2.81626464	3.294777045	1.147164329	1.252762968	0.693147181	emb|LN590674.1| Cyprinus carpio genome assembly common carp genome ,scaffold LG42
File_R_cluster_1_biclust_result_1_bclustnum_14_kamer_1_number_1	emb|LN590981.1| Cyprinus carpio genome assembly common carp genome ,scaffold 000001032	0	0	0.693147181	0	0	0	0	0	0	6.95996815	0	0	0	0	0	0	0	0	0	0	0	0	0	0	0	0	0	0	0	0	emb|LN590981.1| Cyprinus carpio genome assembly common carp genome ,scaffold 000001032
File_R_cluster_1_biclust_result_1_bclustnum_1400_kamer_1_number_1	emb|LN594785.1| Cyprinus carpio genome assembly common carp genome ,scaffold 000000015	0	0	0	0	0	0.693147181	0	0	0	7.151391416	0	0	0	0	0	0	0	0	0	0	0	0	0	0	0	0	0	0	0	0	emb|LN594785.1| Cyprinus carpio genome assembly common carp genome ,scaffold 000000015
File_R_cluster_1_biclust_result_1_bclustnum_14039_kamer_1_number_1	emb|LN590705.1| Cyprinus carpio genome assembly common carp genome ,scaffold LG11	6.773847816	7.272301166	6.949885218	1.111189529	1.900563051	1.916922612	1.086637543	0.693147181	0	0	1.159980164	1.362196322	0	0	0	0.693147181	0	0.693147181	0	0	0	0	0.693147181	0	2.06349253	1.408481398	2.774168723	0.850907054	1.368275492	0.693147181	emb|LN590705.1| Cyprinus carpio genome assembly common carp genome ,scaffold LG11
File_R_cluster_1_biclust_result_1_bclustnum_14061_kamer_1_number_1	emb|LN590705.1| Cyprinus carpio genome assembly common carp genome ,scaffold LG11	6.791473116	7.295979276	7.008713117	1.587777	0.902402739	1.098612289	0.693147181	0	0.693147181	0	1.75604075	0.911012828	0.932376657	1.033472698	0	0.693147181	1.050985947	0.693147181	0	0	0	0	0	0	2.314357525	0.860718824	2.03401783	0.693147181	0	0	emb|LN590705.1| Cyprinus carpio genome assembly common carp genome ,scaffold LG11
File_R_cluster_1_biclust_result_1_bclustnum_14068_kamer_1_number_1	emb|LN590698.1| Cyprinus carpio genome assembly common carp genome ,scaffold LG17	5.354877268	5.414877432	8.812146762	4.366505553	4.796145854	4.76662555	4.229686606	4.39212052	2.50759726	0	2.242865874	2.213199627	0	0	0.693147181	0.693147181	0	0	1.724165619	1.544899391	1.492904096	0	0	0	3.280147767	4.982715814	3.421284282	2.371190956	2.714091913	2.602689685	emb|LN590698.1| Cyprinus carpio genome assembly common carp genome ,scaffold LG17
File_R_cluster_1_biclust_result_1_bclustnum_142341_kamer_1_number_1	emb|LN590674.1| Cyprinus carpio genome assembly common carp genome ,scaffold LG42	8.279544954	8.134951324	8.382893504	4.421925003	4.491081692	4.374465622	1.704748092	1.913862051	2.389841107	0	4.501091071	4.096904616	1.237611621	0	0.916290732	0.693147181	1.053761356	0.99987792	1.077558879	1.480408371	1.540445755	0	0	0	5.517762086	5.604904605	5.280794738	2.14997223	2.406945108	2.35628888	emb|LN590674.1| Cyprinus carpio genome assembly common carp genome ,scaffold LG42
File_R_cluster_1_biclust_result_1_bclustnum_142457_kamer_1_number_1	emb|LN590698.1| Cyprinus carpio genome assembly common carp genome ,scaffold LG17	6.140018164	6.26307059	6.332558231	2.701777234	5.576539838	5.370712444	4.355707043	4.165695762	1.789152741	0	2.355830082	2.670908924	2.236139688	2.632119029	2.532600976	2.591875871	2.48490665	5.89286998	2.382146454	1.993849611	7.312326654	2.103347259	2.012750038	2.645947821	3.17217827	6.664388612	3.476904551	1.85483129	2.325752641	2.438260436	emb|LN590698.1| Cyprinus carpio genome assembly common carp genome ,scaffold LG17
File_R_cluster_1_biclust_result_1_bclustnum_143468_kamer_1_number_1	emb|LN590674.1| Cyprinus carpio genome assembly common carp genome ,scaffold LG42	7.3570012	7.593081959	6.446524258	1.040626474	1.566265241	1.925583527	1.098612289	1.205380813	1.188358534	0	2.041769529	1.761906607	1.077558879	1.890340053	1.800976858	1.555042971	3.11749405	2.194133137	0.693147181	0.902106611	1.317048779	2.460092988	2.133122109	1.889740322	1.775191305	2.822384333	2.155684733	0.693147181	0	0.693147181	emb|LN590674.1| Cyprinus carpio genome assembly common carp genome ,scaffold LG42
File_R_cluster_1_biclust_result_1_bclustnum_144118_kamer_1_number_1	emb|LN590705.1| Cyprinus carpio genome assembly common carp genome ,scaffold LG11	6.955049086	6.904702624	7.097672912	0.693147181	1.374505141	1.548226118	0	0.961409402	1.098612289	0	2.541365745	3.005974641	1.098612289	0	0	2.461919457	2.597669699	2.14696233	0.693147181	0.693147181	2.271813466	0	0	0	3.65214804	3.577947893	3.496507561	0.693147181	0	0.693147181	emb|LN590705.1| Cyprinus carpio genome assembly common carp genome ,scaffold LG11
File_R_cluster_1_biclust_result_1_bclustnum_144861_kamer_1_number_1	emb|LN590705.1| Cyprinus carpio genome assembly common carp genome ,scaffold LG11	7.107220703	6.952269648	7.2031153	2.520338142	3.230155964	3.382109699	2.00590802	1.945910149	2.628335773	0	2.545241033	2.647549738	0.693147181	0	0.693147181	1.371025889	1.088460938	0.693147181	0.913302271	0.693147181	0.693147181	0	0	0	3.401197382	4.352874562	2.632636762	1.093549494	1.489040462	0.693147181	emb|LN590705.1| Cyprinus carpio genome assembly common carp genome ,scaffold LG11
File_R_cluster_1_biclust_result_1_bclustnum_145413_kamer_1_number_1	emb|LN590674.1| Cyprinus carpio genome assembly common carp genome ,scaffold LG42	5.904039448	6.254507427	5.979741095	2.29963976	2.630621851	2.90416508	1.386294361	1.624036828	1.649788756	0	1.54568415	1.32175584	0.693147181	1.063520374	0.693147181	1.342235362	2.647422246	1.47758511	0.693147181	1.806359042	1.281750179	0	0.693147181	1.087052396	3.183555336	3.955195515	3.075550341	2.257849199	2.052290002	2.128231706	emb|LN590674.1| Cyprinus carpio genome assembly common carp genome ,scaffold LG42
File_R_cluster_1_biclust_result_1_bclustnum_147655_kamer_1_number_1	emb|LN590674.1| Cyprinus carpio genome assembly common carp genome ,scaffold LG42	6.756278687	6.661276568	6.439941251	2.788726554	3.748769689	3.502914267	2.577690915	2.750285596	2.136792576	0	1.194337534	1.039424759	0	0.693147181	1.371025889	0.693147181	1.488947966	1.057370067	1.088140989	0.693147181	1.064710737	0	0	0	2.131863199	2.567146941	1.689975882	2.479843855	2.372318224	2.991031241	emb|LN590674.1| Cyprinus carpio genome assembly common carp genome ,scaffold LG42
File_R_cluster_1_biclust_result_1_bclustnum_147757_kamer_1_number_1	emb|LN590705.1| Cyprinus carpio genome assembly common carp genome ,scaffold LG11	5.607102691	5.966859306	6.019670493	1.279863829	2.251957893	1.332948963	0.890143862	1.045123604	0	0	0.693147181	0.834559934	0	0	0	0	1.072637855	0.693147181	0.693147181	0	0.693147181	0	0	0	3.139338989	1.837127913	3.684755964	0.693147181	1.107016871	0	emb|LN590705.1| Cyprinus carpio genome assembly common carp genome ,scaffold LG11
File_R_cluster_1_biclust_result_1_bclustnum_14836_kamer_1_number_1	emb|LN592699.1| Cyprinus carpio genome assembly common carp genome ,scaffold 000000883	0	0	0	0	0	0	0	0	0	7.385646469	0	0	0	0	0	0	0	0	0	0	0	0	0	0	0	0	0	0	0	0	emb|LN592699.1| Cyprinus carpio genome assembly common carp genome ,scaffold 000000883
File_R_cluster_1_biclust_result_1_bclustnum_14844_kamer_1_number_1	emb|LN590705.1| Cyprinus carpio genome assembly common carp genome ,scaffold LG11	6.547108171	6.474108265	6.71560518	1.324567882	1.372109226	1.041452698	0.693147181	1.483523154	0.890611833	0	0.693147181	1.346791808	1.349925976	0.693147181	0.693147181	0.693147181	2.092180061	1.048350042	0.693147181	0	1.301953053	0.693147181	0	0.693147181	1.320816732	3.004845621	1.92968204	0.938889446	0.693147181	1.086637543	emb|LN590705.1| Cyprinus carpio genome assembly common carp genome ,scaffold LG11
File_R_cluster_1_biclust_result_1_bclustnum_149217_kamer_1_number_1	emb|LN590705.1| Cyprinus carpio genome assembly common carp genome ,scaffold LG11	6.051128708	6.411213816	6.023701798	1.852122096	2.103813371	1.830980182	0.867764133	0.890143862	0.693147181	0	1.930758802	2.200144754	0	0	0.693147181	0	1.363987401	1.089043318	0	0.693147181	1.187166364	0.693147181	0.693147181	0	2.69391747	3.092237194	2.288005323	1.098612289	1.272408721	0.693147181	emb|LN590705.1| Cyprinus carpio genome assembly common carp genome ,scaffold LG11
File_R_cluster_1_biclust_result_1_bclustnum_149971_kamer_1_number_1	emb|LN590674.1| Cyprinus carpio genome assembly common carp genome ,scaffold LG42	3.807044639	3.78692906	3.882274885	3.304513926	3.627472026	3.581781319	3.569188975	3.48606229	3.686017864	0	1.655422239	1.732570171	0	0	0	0	0	0	1.577689214	0	0	0	0	0	6.963483226	6.410457737	7.065997577	2.965273066	2.711962538	2.829530099	emb|LN590674.1| Cyprinus carpio genome assembly common carp genome ,scaffold LG42
File_R_cluster_1_biclust_result_1_bclustnum_152502_kamer_1_number_1	emb|LN590674.1| Cyprinus carpio genome assembly common carp genome ,scaffold LG42	6.469946199	6.635087919	6.309196199	3.005301344	3.157544954	2.7693397	1.531126039	2.519646184	1.960643929	0	1.704748092	1.609437912	0	0	1.364633959	1.871802177	1.83550359	0.693147181	0.886437526	0.693147181	1.883875158	0	0	0	4.369447852	4.879979762	4.434625015	2.349518296	2.299353878	2.814054509	emb|LN590674.1| Cyprinus carpio genome assembly common carp genome ,scaffold LG42
File_R_cluster_1_biclust_result_1_bclustnum_15254_kamer_1_number_1	emb|LN590674.1| Cyprinus carpio genome assembly common carp genome ,scaffold LG42	7.099044836	7.09426804	7.623451313	4.596874875	3.883504182	3.746601043	3.471155565	3.458462642	2.257849199	0	3.860272765	3.768921393	0.693147181	0	0	0.693147181	0	0	2.118261934	1.508896876	2.651451631	0	0	0	4.080970527	4.436151354	4.210085514	2.619189843	2.56974553	3.069503046	emb|LN590674.1| Cyprinus carpio genome assembly common carp genome ,scaffold LG42
File_R_cluster_1_biclust_result_1_bclustnum_15520_kamer_1_number_1	emb|LN590705.1| Cyprinus carpio genome assembly common carp genome ,scaffold LG11	6.767443235	6.665979216	6.305826281	0.693147181	0.693147181	0.693147181	0.693147181	0	0	0	1.468533117	0	0	0	1.468360405	1.088760586	2.167371143	1.058605934	0.693147181	0	1.058605934	0	0	0	0.889856403	1.924988524	0	0	0	0.693147181	emb|LN590705.1| Cyprinus carpio genome assembly common carp genome ,scaffold LG11
File_R_cluster_1_biclust_result_1_bclustnum_155394_kamer_1_number_1	emb|LN590674.1| Cyprinus carpio genome assembly common carp genome ,scaffold LG42	6.10453427	6.041874827	6.23404203	1.086637543	1.199615324	1.098612289	0.871837151	0	1.098612289	0	0.693147181	1.03375016	0	0	0	0	0.693147181	0	0	0	0	0	0	0	0.693147181	1.854937691	1.07416248	0.693147181	1.377326772	1.086637543	emb|LN590674.1| Cyprinus carpio genome assembly common carp genome ,scaffold LG42
File_R_cluster_1_biclust_result_1_bclustnum_156348_kamer_1_number_1	emb|LN590705.1| Cyprinus carpio genome assembly common carp genome ,scaffold LG11	6.185208124	6.071813362	6.278495157	1.216395324	1.957744136	2.161086043	1.098612289	1.093971537	1.098612289	0	1.350954707	0	0	0.693147181	0.693147181	2.105417477	2.051619318	1.574550358	0.693147181	1.065668898	0.693147181	0	0	0	1.420427636	2.867739798	1.195605899	0.693147181	0.899197471	0.693147181	emb|LN590705.1| Cyprinus carpio genome assembly common carp genome ,scaffold LG11
File_R_cluster_1_biclust_result_1_bclustnum_1582_kamer_1_number_1	emb|LN590705.1| Cyprinus carpio genome assembly common carp genome ,scaffold LG11	7.504297942	7.857937162	7.534954946	4.335000539	2.98874794	2.789630188	3.214365669	3.092178172	1.920267013	0	4.423198568	3.758288905	0	0.693147181	0.693147181	1.542229163	1.809777826	1.341558467	1.214443792	1.754758291	0.913691356	1.057112981	0.693147181	0.693147181	4.935552488	4.03997637	5.031176211	1.668202924	0.860718824	0	emb|LN590705.1| Cyprinus carpio genome assembly common carp genome ,scaffold LG11
File_R_cluster_1_biclust_result_1_bclustnum_15857_kamer_1_number_1	emb|LN590674.1| Cyprinus carpio genome assembly common carp genome ,scaffold LG42	7.136491164	7.106311012	7.316182662	3.547756461	2.864797507	2.924698034	2.200802613	2.234823249	2.594291557	0	2.008042206	1.753766802	0.693147181	1.098612289	1.551374383	1.565231029	1.733051031	0	0	0.693147181	1.260254834	0	0	0	4.151646021	4.622076466	3.81262689	3.278400548	2.029844177	2.606268459	emb|LN590674.1| Cyprinus carpio genome assembly common carp genome ,scaffold LG42
File_R_cluster_1_biclust_result_1_bclustnum_158900_kamer_1_number_1	emb|LN590713.1| Cyprinus carpio genome assembly common carp genome ,scaffold LG20	6.649805457	7.078847354	6.563769486	3.019683148	3.074871496	2.326960582	1.801810455	1.420944549	2.014903021	0	1.652922599	1.346791808	0	0	0	0.693147181	1.02629246	0.693147181	0.693147181	0	0.966188853	0	0	0.693147181	1.854771826	2.440223042	2.902492449	2.2385062	1.774518358	2.56027692	emb|LN590713.1| Cyprinus carpio genome assembly common carp genome ,scaffold LG20
File_R_cluster_1_biclust_result_1_bclustnum_159858_kamer_1_number_1	emb|LN590674.1| Cyprinus carpio genome assembly common carp genome ,scaffold LG42	7.047517221	6.762845107	6.979061473	4.220557154	3.351905592	3.312107482	2.283839487	2.839914371	1.803594162	0	2.741762179	2.667228207	0	0	0.693147181	1.098612289	0.693147181	0.693147181	0.693147181	0.693147181	1.069454639	0	1.053151077	0	4.438946756	4.552071052	4.446509686	3.065799235	2.506725218	2.913665018	emb|LN590674.1| Cyprinus carpio genome assembly common carp genome ,scaffold LG42
File_R_cluster_1_biclust_result_1_bclustnum_16_kamer_1_number_1	emb|LN590674.1| Cyprinus carpio genome assembly common carp genome ,scaffold LG42	5.732233868	6.04610897	5.819634759	3.003918673	3.306937983	3.498581168	2.163165542	1.270221113	1.670546182	0	1.730564685	1.628434332	0	0	0	0	0.693147181	0.693147181	0.693147181	0	1.049821124	0	0	0	3.093530265	3.074719039	3.935311706	1.805364828	2.679691878	2.13396287	emb|LN590674.1| Cyprinus carpio genome assembly common carp genome ,scaffold LG42
File_R_cluster_1_biclust_result_1_bclustnum_16015_kamer_1_number_1	emb|LN590674.1| Cyprinus carpio genome assembly common carp genome ,scaffold LG42	8.978367961	8.964611174	9.004791129	3.320616196	2.446295751	2.95801483	2.04811211	2.192886292	1.427635421	0	2.69497847	3.059866025	0	0.693147181	1.737692155	2.279054405	2.345251785	1.899748029	1.353288098	1.071943141	2.140066163	0	0	1.346021695	2.261492228	2.161978444	2.66198532	2.203738869	2.169919611	1.408767439	emb|LN590674.1| Cyprinus carpio genome assembly common carp genome ,scaffold LG42
File_R_cluster_1_biclust_result_1_bclustnum_160302_kamer_1_number_1	emb|LN590713.1| Cyprinus carpio genome assembly common carp genome ,scaffold LG20	6.824470404	7.31321372	6.981721098	3.70745584	3.737669618	3.344729318	2.197224577	2.687847494	2.388762789	0	1.40199299	2.000453798	0.693147181	0	0	0	1.749199855	1.065551763	1.076870983	0	0	0	0	0	2.567868171	2.60222291	3.07011128	2.831376364	2.901421594	2.111032259	emb|LN590713.1| Cyprinus carpio genome assembly common carp genome ,scaffold LG20
File_R_cluster_1_biclust_result_1_bclustnum_160625_kamer_1_number_1	emb|LN590692.1| Cyprinus carpio genome assembly common carp genome ,scaffold LG33	6.809369274	6.854430449	5.518833469	3.045964255	2.604584186	3.288401888	1.542746676	2.039876569	1.558144618	0	1.124254044	1.175205978	0	0	0.693147181	0	0	0.693147181	0.693147181	0	0	0	0	0	1.789067516	2.126036441	2.008042206	1.793476328	1.83982715	2.249475413	emb|LN590692.1| Cyprinus carpio genome assembly common carp genome ,scaffold LG33
File_R_cluster_1_biclust_result_1_bclustnum_16138_kamer_1_number_1	emb|LN591305.1| Cyprinus carpio genome assembly common carp genome ,scaffold 000001301	5.700747875	5.663401355	5.834649905	3.897098182	7.15437314	7.174655395	5.615115182	5.443676658	3.626035496	0	0.693147181	0.70236457	0	0	0	0	0	0	0	0	0	0	0	0	4.377471275	8.529605835	4.399375273	4.296528657	4.002947217	4.246110973	emb|LN591305.1| Cyprinus carpio genome assembly common carp genome ,scaffold 000001301
File_R_cluster_1_biclust_result_1_bclustnum_164175_kamer_1_number_1	emb|LN590674.1| Cyprinus carpio genome assembly common carp genome ,scaffold LG42	6.287966361	6.682435612	5.957600064	3.445144089	3.759850368	3.980628869	3.243498191	3.550367106	2.662585501	0	2.678635122	2.010060648	0.693147181	0.693147181	1.060872345	2.367123927	2.140918741	1.805552243	0.896744952	0.693147181	0.693147181	2.528389102	2.349837886	2.766319109	3.63682271	3.80084784	3.31075467	2.372543898	1.841239871	2.021642923	emb|LN590674.1| Cyprinus carpio genome assembly common carp genome ,scaffold LG42
File_R_cluster_1_biclust_result_1_bclustnum_164641_kamer_1_number_1	emb|LN590674.1| Cyprinus carpio genome assembly common carp genome ,scaffold LG42	2.777961762	2.629158497	2.090160142	2.127820907	2.121642185	2.057654672	2.959747519	3.105048455	2.95819654	0	0	1.232860508	0	0	0	0	0	0	0	0	0	0.693147181	0	0	6.632252075	6.28358737	6.685818499	1.360091546	0	0.693147181	emb|LN590674.1| Cyprinus carpio genome assembly common carp genome ,scaffold LG42
File_R_cluster_1_biclust_result_1_bclustnum_165190_kamer_1_number_1	emb|LN591305.1| Cyprinus carpio genome assembly common carp genome ,scaffold 000001301	7.005399097	6.672554329	6.476813889	2.187371753	2.51508015	2.463853241	1.943806509	1.680390196	2.060887984	0	2.062759416	2.0514805	0	0	1.277661832	1.786368296	2.693126055	2.042476682	0	1.078810861	0.693147181	1.06582391	1.361804415	2.141962012	3.057739469	3.733458383	2.968905636	1.696693926	1.693995949	1.083796407	emb|LN591305.1| Cyprinus carpio genome assembly common carp genome ,scaffold 000001301
File_R_cluster_1_biclust_result_1_bclustnum_165538_kamer_1_number_1	emb|LN590674.1| Cyprinus carpio genome assembly common carp genome ,scaffold LG42	5.648343758	6.15534842	6.020617927	1.87966045	1.857274076	1.933007264	0.693147181	1.360091546	0	0	0.693147181	0.693147181	0	0.693147181	0	1.35644064	0	0.977532575	0.693147181	0	0	0	0	0.693147181	2.598882447	2.63905733	3.712947481	0.693147181	0.693147181	0.693147181	emb|LN590674.1| Cyprinus carpio genome assembly common carp genome ,scaffold LG42
File_R_cluster_1_biclust_result_1_bclustnum_16569_kamer_1_number_1	emb|LN590674.1| Cyprinus carpio genome assembly common carp genome ,scaffold LG42	6.283688166	6.095475402	6.392359227	1.064710737	1.258781961	1.708582549	1.566265241	0.887302607	0	0	0.922722007	0.693147181	0.693147181	0	0.693147181	1.766944099	2.082641417	1.542543552	0	1.045587672	0.693147181	0	0	0	2.176670334	2.696719585	1.594839878	0	0.693147181	0.896373698	emb|LN590674.1| Cyprinus carpio genome assembly common carp genome ,scaffold LG42
File_R_cluster_1_biclust_result_1_bclustnum_16600_kamer_1_number_1	emb|LN590674.1| Cyprinus carpio genome assembly common carp genome ,scaffold LG42	8.577670979	8.573306949	8.818224761	4.605023175	5.786581381	5.488512016	5.066587054	5.045983133	4.100941091	0	4.402044925	4.120708947	1.602749595	1.098612289	0	2.772588722	3.402150261	1.596449933	1.201027471	1.490920107	1.779428758	0.693147181	1.098612289	0.693147181	5.491669529	5.521756874	5.781332848	2.213432516	2.377637833	1.655422239	emb|LN590674.1| Cyprinus carpio genome assembly common carp genome ,scaffold LG42
File_R_cluster_1_biclust_result_1_bclustnum_166132_kamer_1_number_1	emb|LN590674.1| Cyprinus carpio genome assembly common carp genome ,scaffold LG42	6.650668365	6.651217806	6.377379796	3.391046031	2.402023105	2.744015622	1.852384091	2.123116263	2.247777209	0	1.568615918	1.296788056	0.693147181	0	1.288838631	0.693147181	1.644706596	0.693147181	1.089043318	0	1.093221116	0	0	0.693147181	1.924912665	2.597096294	2.048134036	1.805364828	1.509526965	1.524696684	emb|LN590674.1| Cyprinus carpio genome assembly common carp genome ,scaffold LG42
File_R_cluster_1_biclust_result_1_bclustnum_166313_kamer_1_number_1	emb|LN590674.1| Cyprinus carpio genome assembly common carp genome ,scaffold LG42	8.020776591	8.179665198	7.536443935	4.680194167	4.247214422	4.217090079	3.254069208	3.506856853	3.013483779	0	3.927425771	3.734822713	2.105611112	2.145742961	1.764509882	2.474755299	3.936483396	3.191405959	1.063164715	1.576050711	1.544700972	2.8312526	1.91200909	2.305912551	5.325772015	4.432237218	5.626116385	2.881207673	2.003897346	1.769116713	emb|LN590674.1| Cyprinus carpio genome assembly common carp genome ,scaffold LG42
File_R_cluster_1_biclust_result_1_bclustnum_166403_kamer_1_number_1	emb|LN594502.1| Cyprinus carpio genome assembly common carp genome ,scaffold 000004095	1.609437912	1.791759469	0.693147181	2.239949826	2.079441542	2.431013487	1.30933232	1.791759469	0.693147181	7.324199891	5.284071373	5.018405031	0	0	0.693147181	0	0.693147181	0	0	0	0	1.386294361	1.059393176	1.355835154	1.708109708	1.609437912	1.292769087	1.346021695	1.170070563	0.839102945	emb|LN594502.1| Cyprinus carpio genome assembly common carp genome ,scaffold 000004095
File_R_cluster_1_biclust_result_1_bclustnum_167274_kamer_1_number_1	emb|LN590698.1| Cyprinus carpio genome assembly common carp genome ,scaffold LG17	6.282907663	5.960564521	5.093136516	3.67107438	2.928523524	3.277144733	2.335374593	2.755906596	2.276534709	0	1.08780072	1.302211419	0.693147181	0.693147181	0	0	1.542746676	0	0	0.919461699	0.693147181	1.474000705	0	1.299283893	2.690761611	2.004091452	2.482520472	2.168237367	2.224623552	2.840772934	emb|LN590698.1| Cyprinus carpio genome assembly common carp genome ,scaffold LG17
File_R_cluster_1_biclust_result_1_bclustnum_16790_kamer_1_number_1	emb|LN590674.1| Cyprinus carpio genome assembly common carp genome ,scaffold LG42	6.030480912	6.146902969	6.196788264	3.085518131	3.298078795	2.397895273	2.048804483	1.266750401	1.882006855	0	0.899762897	1.621487029	0.693147181	0	0.693147181	0	0	0	0.693147181	0	0.693147181	0	0	0.693147181	2.115745746	2.531909503	2.120826977	2.780885459	2.008824584	2.492940955	emb|LN590674.1| Cyprinus carpio genome assembly common carp genome ,scaffold LG42
File_R_cluster_1_biclust_result_1_bclustnum_167940_kamer_1_number_1	emb|LN590674.1| Cyprinus carpio genome assembly common carp genome ,scaffold LG42	5.943788387	5.587357267	6.215149952	3.101528194	1.950043026	1.762346106	0.871837151	1.098612289	1.098612289	0	2.591351577	2.633865303	0.693147181	0	1.06686359	0.693147181	2.102814992	1.338285142	0.901692697	1.037987875	1.054649952	0.693147181	1.076138296	0.693147181	2.618132787	2.166601553	2.00616899	0.693147181	0	0	emb|LN590674.1| Cyprinus carpio genome assembly common carp genome ,scaffold LG42
File_R_cluster_1_biclust_result_1_bclustnum_16844_kamer_1_number_1	emb|LN591055.1| Cyprinus carpio genome assembly common carp genome ,scaffold 000001389	7.656909377	7.630480679	7.704473876	2.919569114	2.469869151	2.778253895	2.21557408	2.328902726	1.950229379	0	1.062055491	0.693147181	0	0	0	1.378914698	1.268512575	0	0	1.076870983	0.693147181	0	0	0	2.017199049	1.96889957	2.027325541	1.91119891	1.999865184	1.897865707	emb|LN591055.1| Cyprinus carpio genome assembly common carp genome ,scaffold 000001389
File_R_cluster_1_biclust_result_1_bclustnum_170_kamer_1_number_1	emb|LN591055.1| Cyprinus carpio genome assembly common carp genome ,scaffold 000001389	4.696572741	4.728652505	4.978208516	3.138593755	3.193996895	3.327601073	2.784128136	2.767218076	2.426067412	0	3.925925911	4.066581031	2.579019143	1.914534469	1.92944825	2.901421594	3.365376748	2.971839091	1.649258446	1.393411474	2.209119112	0	0	0.693147181	2.312535424	2.81026377	2.544974254	10.43574683	10.47561051	10.18234581	emb|LN591055.1| Cyprinus carpio genome assembly common carp genome ,scaffold 000001389
File_R_cluster_1_biclust_result_1_bclustnum_170075_kamer_1_number_1	emb|LN590674.1| Cyprinus carpio genome assembly common carp genome ,scaffold LG42	6.331341695	7.088475554	6.615035204	3.19919543	2.609312153	3.002757538	0	0	0.693147181	0	2.6803158	2.089010612	0.693147181	0	0	0.693147181	1.359626925	1.073919926	0	0	0.693147181	0	0	0	3.223481204	4.167062044	4.508603117	0.693147181	0.693147181	1.086637543	emb|LN590674.1| Cyprinus carpio genome assembly common carp genome ,scaffold LG42
File_R_cluster_1_biclust_result_1_bclustnum_172627_kamer_1_number_1	emb|LN590705.1| Cyprinus carpio genome assembly common carp genome ,scaffold LG11	6.091911511	6.179434704	6.136748173	1.428366774	1.428366774	1.874202371	0.878069519	1.086637543	1.086637543	0	0.693147181	0.693147181	0	0	0	0	0.693147181	0	0	0	0.693147181	0	0	0	1.050604818	2.910991045	1.500600247	1.360091546	0.693147181	1.351203309	emb|LN590705.1| Cyprinus carpio genome assembly common carp genome ,scaffold LG11
File_R_cluster_1_biclust_result_1_bclustnum_1731_kamer_1_number_1	emb|LN590674.1| Cyprinus carpio genome assembly common carp genome ,scaffold LG42	6.574572227	6.768908068	7.115273386	2.435077196	3.168285441	2.307657208	1.351203309	1.343733877	1.76766143	0	1.459907211	0	0	0	0	0.693147181	1.690289524	1.078810861	0.693147181	0.888121683	1.076138296	0	0	0.693147181	1.979083769	2.26436388	1.905418457	2.095441605	1.900563051	2.023753076	emb|LN590674.1| Cyprinus carpio genome assembly common carp genome ,scaffold LG42
File_R_cluster_1_biclust_result_1_bclustnum_174362_kamer_1_number_1	emb|LN590674.1| Cyprinus carpio genome assembly common carp genome ,scaffold LG42	6.018033447	6.081540598	6.176345326	3.081786109	3.076616166	3.158934719	2.024381953	2.165972387	2.193633693	0	1.414578079	0.693147181	0	0.693147181	0.693147181	0	1.078810861	0	0	0.693147181	0.693147181	0	0	0.693147181	2.320236388	2.457509759	2.41253307	1.905546383	1.963887582	2.867546567	emb|LN590674.1| Cyprinus carpio genome assembly common carp genome ,scaffold LG42
File_R_cluster_1_biclust_result_1_bclustnum_174463_kamer_5_number_2	emb|LN591055.1| Cyprinus carpio genome assembly common carp genome ,scaffold 000001389	4.89990483	4.896234034	4.784671102	3.54917476	5.965713312	5.806709031	5.912004586	5.829216169	2.635293111	0	2.702742808	2.642565455	1.443236918	2.036882362	1.582409925	1.898731685	1.21924164	1.346448453	0.693147181	1.687653722	1.721649903	0	0	0	3.317257646	7.074743208	3.358769932	4.156439475	4.291933696	4.495000346	emb|LN591055.1| Cyprinus carpio genome assembly common carp genome ,scaffold 000001389
File_R_cluster_1_biclust_result_1_bclustnum_175613_kamer_1_number_1	emb|LN591305.1| Cyprinus carpio genome assembly common carp genome ,scaffold 000001301	6.629202078	6.641588093	6.806709884	2.400346811	1.602270286	1.021652048	1.473586115	0	1.473586115	0	2.371758482	1.764360865	0	0	0	1.098612289	0.693147181	0.693147181	0	0	1.060872345	0	0.693147181	0.693147181	2.373018393	2.399121793	2.201718907	1.213386357	1.319604194	1.581464273	emb|LN591305.1| Cyprinus carpio genome assembly common carp genome ,scaffold 000001301
File_R_cluster_1_biclust_result_1_bclustnum_175797_kamer_1_number_1	emb|LN590674.1| Cyprinus carpio genome assembly common carp genome ,scaffold LG42	6.997815337	7.422206323	7.037914743	1.852384091	1.010389269	1.368901478	0.693147181	0.993251773	1.386294361	0	1.134979576	1.86601624	0	0.693147181	0	1.058605934	1.066350771	0.693147181	0	0	0	0	0	0	4.02557488	2.851428784	4.874914841	0	1.386294361	1.386294361	emb|LN590674.1| Cyprinus carpio genome assembly common carp genome ,scaffold LG42
File_R_cluster_1_biclust_result_1_bclustnum_176904_kamer_1_number_1	emb|LN590698.1| Cyprinus carpio genome assembly common carp genome ,scaffold LG17	0	0	0	0	0	0	0	0	0	7.39357074	0	0	0	0	0	0	0	0	0	0	0	0	0	0	0	0	0	0	0	0	emb|LN590698.1| Cyprinus carpio genome assembly common carp genome ,scaffold LG17
File_R_cluster_1_biclust_result_1_bclustnum_17797_kamer_1_number_1	emb|LN590674.1| Cyprinus carpio genome assembly common carp genome ,scaffold LG42	6.998710535	6.936546797	7.065340056	2.560725063	0.693147181	1.420427636	1.19847874	1.093971537	0	0	1.56461208	2.608251965	0	0	0	0	1.501362604	0.693147181	0.693147181	1.044810588	0.693147181	0	1.089043318	0	3.032710089	3.193910775	2.938653857	0.862830882	0.863493149	0.693147181	emb|LN590674.1| Cyprinus carpio genome assembly common carp genome ,scaffold LG42
File_R_cluster_1_biclust_result_1_bclustnum_17803_kamer_1_number_1	emb|LN590674.1| Cyprinus carpio genome assembly common carp genome ,scaffold LG42	7.174065594	7.28623281	7.374227681	2.941508373	2.959674952	2.282949572	2.822532982	2.916266899	1.684339427	0	3.837060206	3.826828885	0	0	0	1.913649615	1.575535671	0.693147181	0.893816058	1.692042259	1.699684384	0	0	1.098612289	4.121744077	3.564825862	4.221548269	0	1.098612289	0	emb|LN590674.1| Cyprinus carpio genome assembly common carp genome ,scaffold LG42
File_R_cluster_1_biclust_result_1_bclustnum_17883_kamer_1_number_1	emb|LN590674.1| Cyprinus carpio genome assembly common carp genome ,scaffold LG42	6.665117953	6.605936418	6.298003947	2.875444228	2.249828623	2.268683886	1.941435869	1.574802988	2.32565004	0	1.393215356	1.076870983	0	0	0.693147181	1.036091287	1.88798741	0.693147181	0	0.693147181	0.693147181	0	0.693147181	0.693147181	2.1768155	1.925869236	2.249475413	2.128231706	2.009598309	2.794521432	emb|LN590674.1| Cyprinus carpio genome assembly common carp genome ,scaffold LG42
File_R_cluster_1_biclust_result_1_bclustnum_179560_kamer_1_number_1	emb|LN590698.1| Cyprinus carpio genome assembly common carp genome ,scaffold LG17	7.377346323	8.110709565	7.826570821	3.106853166	3.933097373	3.800874661	2.072841056	2.512659615	3.43775108	0	3.203169118	3.188816537	0	0.961409402	0	0.693147181	2.349208149	1.558144618	0.693147181	0.693147181	0.693147181	0	0	0	3.606345312	4.858501468	4.827585472	1.740694219	1.595048885	1.917685556	emb|LN590698.1| Cyprinus carpio genome assembly common carp genome ,scaffold LG17
File_R_cluster_1_biclust_result_1_bclustnum_18260_kamer_1_number_1	emb|LN590680.1| Cyprinus carpio genome assembly common carp genome ,scaffold LG4	0	0	0	0	0	0	0	0	0	7.258651559	0	0	0	0	0	0	0	0	0	0	0	0	0	0	0	0.693147181	0	0	0	0	emb|LN590680.1| Cyprinus carpio genome assembly common carp genome ,scaffold LG4
File_R_cluster_1_biclust_result_1_bclustnum_18296_kamer_1_number_1	emb|LN590713.1| Cyprinus carpio genome assembly common carp genome ,scaffold LG20	7.026728717	7.096100325	7.521437085	3.159036645	2.551154646	2.654593164	2.309229967	1.433125465	1.95453145	0	2.004806892	2.743044045	0.693147181	0	0	0.693147181	1.585626661	1.35644064	0.693147181	1.068757709	0.897360684	0	0.693147181	0	2.806259206	2.411502276	2.616293035	2.108135893	2.121359336	2.482127792	emb|LN590713.1| Cyprinus carpio genome assembly common carp genome ,scaffold LG20
File_R_cluster_1_biclust_result_1_bclustnum_184080_kamer_1_number_1	emb|LN590674.1| Cyprinus carpio genome assembly common carp genome ,scaffold LG42	6.566434708	6.474954945	6.867153052	3.156702504	3.211524873	2.661929471	3.059171753	2.528540687	1.620801106	0	2.591673676	2.44540323	0	0	0	0	1.513045948	1.098612289	0	0.693147181	1.468533117	0.693147181	0.693147181	0	4.051663201	3.623025401	3.637957144	1.854062681	1.943896695	2.63905733	emb|LN590674.1| Cyprinus carpio genome assembly common carp genome ,scaffold LG42
File_R_cluster_1_biclust_result_1_bclustnum_184195_kamer_1_number_1	emb|LN590674.1| Cyprinus carpio genome assembly common carp genome ,scaffold LG42	5.762334362	5.795708146	5.997630498	2.521584067	2.281587172	1.808708355	0.993733139	0.99514997	1.098612289	0	1.009267282	1.158976484	1.070442555	0	0	0	0.693147181	0.693147181	0	0	0	0	0	0	2.910119917	3.37038416	3.094531813	0.693147181	0.693147181	1.554628972	emb|LN590674.1| Cyprinus carpio genome assembly common carp genome ,scaffold LG42
File_R_cluster_1_biclust_result_1_bclustnum_184314_kamer_1_number_1	emb|LN591305.1| Cyprinus carpio genome assembly common carp genome ,scaffold 000001301	7.006060968	7.41207579	6.993841228	1.926009145	1.595048885	1.595048885	0.693147181	0	1.351203309	0	2.05017106	1.207810431	0	0.693147181	0	0.693147181	0.693147181	1.328400383	0	0.693147181	0.693147181	0	0	0	3.953141916	2.833213344	4.68567125	1.086637543	0.890972924	1.377326772	emb|LN591305.1| Cyprinus carpio genome assembly common carp genome ,scaffold 000001301
File_R_cluster_1_biclust_result_1_bclustnum_185392_kamer_1_number_1	emb|LN591055.1| Cyprinus carpio genome assembly common carp genome ,scaffold 000001389	5.990051049	5.966369791	6.159737888	2.487320401	2.656504243	3.127558463	2.366146574	1.335001067	1.295321511	0	1.432321187	1.397105707	0	0	1.067840318	1.098612289	1.041452698	1.343733877	2.387299334	1.093133977	0.693147181	0	0.693147181	0	1.815627352	1.671255234	1.933409483	1.943710589	2.564949357	1.791759469	emb|LN591055.1| Cyprinus carpio genome assembly common carp genome ,scaffold 000001389
File_R_cluster_1_biclust_result_1_bclustnum_18548_kamer_1_number_1	emb|LN590674.1| Cyprinus carpio genome assembly common carp genome ,scaffold LG42	5.76715782	6.239249978	6.013839843	1.614552809	2.529824246	3.055452958	1.654558495	1.454431867	2.256675177	0	0.966303006	1.745849902	0.693147181	0	0	0.693147181	1.731655545	0	0	0.693147181	0.693147181	0	0	0	2.23084094	2.646359178	2.99829399	0.693147181	0.858661619	1.086637543	emb|LN590674.1| Cyprinus carpio genome assembly common carp genome ,scaffold LG42
File_R_cluster_1_biclust_result_1_bclustnum_186047_kamer_1_number_1	emb|LN590705.1| Cyprinus carpio genome assembly common carp genome ,scaffold LG11	6.583197582	6.717351146	7.082850791	1.587777	1.386294361	1.458615023	0.693147181	0.693147181	0.693147181	0	1.30833282	1.301953053	0	0	0	0	1.29167869	1.088760586	1.088140989	0	1.317825459	0	0	0	0.829280809	1.737049819	1.275281792	1.06582391	1.098612289	1.377326772	emb|LN590705.1| Cyprinus carpio genome assembly common carp genome ,scaffold LG11
File_R_cluster_1_biclust_result_1_bclustnum_18661_kamer_1_number_1	emb|LN590674.1| Cyprinus carpio genome assembly common carp genome ,scaffold LG42	6.806754136	6.669028436	6.409240235	0.887302607	1.281694667	1.41996847	1.084817578	1.094035163	0.693147181	0	0.693147181	1.042331137	0.693147181	0	1.49231291	1.919934249	2.379997884	0.693147181	0	0.693147181	0.693147181	0	0.693147181	0	1.064710737	1.807614774	1.098612289	0	1.012843775	0	emb|LN590674.1| Cyprinus carpio genome assembly common carp genome ,scaffold LG42
File_R_cluster_1_biclust_result_1_bclustnum_188003_kamer_1_number_1	emb|LN590705.1| Cyprinus carpio genome assembly common carp genome ,scaffold LG11	5.970128545	5.694906533	6.013365462	1.203971804	1.768502784	1.537037098	0	0.693147181	1.791759469	0	0.693147181	1.08780072	0	0	0	0	0	0	0	0	0	0	0	0	2.825714711	3.091042453	2.509729335	0.693147181	0.887302607	0.693147181	emb|LN590705.1| Cyprinus carpio genome assembly common carp genome ,scaffold LG11
File_R_cluster_1_biclust_result_1_bclustnum_188559_kamer_1_number_1	emb|LN590705.1| Cyprinus carpio genome assembly common carp genome ,scaffold LG11	6.552704729	6.315802749	5.071027732	2.501435952	2.234141356	1.898656803	1.21924164	1.098612289	0	0	1.809548633	1.7282462	1.086637543	2.1690537	1.386294361	0.693147181	1.572396263	1.386294361	1.087052396	0.693147181	0.693147181	1.884978069	1.292769087	2.123116263	3.480054772	0.693147181	2.821378886	2.434963321	0	0.693147181	emb|LN590705.1| Cyprinus carpio genome assembly common carp genome ,scaffold LG11
File_R_cluster_1_biclust_result_1_bclustnum_189309_kamer_1_number_1	emb|LN591305.1| Cyprinus carpio genome assembly common carp genome ,scaffold 000001301	5.930636467	5.751765964	6.061850781	1.926009145	1.959896173	1.148966309	1.386294361	1.098612289	1.583759014	0	0.878983387	1.074859068	0.693147181	1.057370067	0	1.771350958	1.84103047	0	0.693147181	0.693147181	0.916290732	0.693147181	0.693147181	0.693147181	2.512683931	2.998543319	2.345320775	0.884816577	0.893071234	1.169564573	emb|LN591305.1| Cyprinus carpio genome assembly common carp genome ,scaffold 000001301
File_R_cluster_1_biclust_result_1_bclustnum_1896_kamer_1_number_1	emb|LN590705.1| Cyprinus carpio genome assembly common carp genome ,scaffold LG11	6.633573664	6.729973402	7.115638989	1.098612289	1.660870297	1.450181889	0	0	0.693147181	0	1.35812377	1.318044963	0	0.693147181	0	0.693147181	0	0	0.693147181	0.693147181	0.693147181	0	0.693147181	0.693147181	1.40720177	1.712295899	1.762603536	0.693147181	1.368275492	1.098612289	emb|LN590705.1| Cyprinus carpio genome assembly common carp genome ,scaffold LG11
File_R_cluster_1_biclust_result_1_bclustnum_189700_kamer_7_number_2	emb|LN590698.1| Cyprinus carpio genome assembly common carp genome ,scaffold LG17	0	0	0	0	0	0	0	0	0	6.722865627	0	0	0	0	0	0	0	0	0	0	0	0	0	0	0	0	0	0	0	0	emb|LN590698.1| Cyprinus carpio genome assembly common carp genome ,scaffold LG17
File_R_cluster_1_biclust_result_1_bclustnum_191_kamer_1_number_1	emb|LN590674.1| Cyprinus carpio genome assembly common carp genome ,scaffold LG42	5.634300198	5.68306603	6.036856085	1.054649952	1.262501113	1.086637543	0.693147181	0	0	0	0.693147181	1.329940917	0	0	0	0	0	0	0	0	0	0	0	0	2.665135741	2.545797903	2.963012782	0.693147181	0.693147181	1.098612289	emb|LN590674.1| Cyprinus carpio genome assembly common carp genome ,scaffold LG42
File_R_cluster_1_biclust_result_1_bclustnum_191296_kamer_1_number_1	emb|LN590713.1| Cyprinus carpio genome assembly common carp genome ,scaffold LG20	6.762065703	6.944154708	6.101934239	2.833213344	2.672602627	2.389841107	1.991092452	1.300638429	1.750697863	0	1.293921364	1.960508783	0	0.693147181	0	0.693147181	0	0	1.060872345	0	0	0	1.039424759	0	1.712737907	1.999092016	2.219953203	3.18221184	1.580449787	1.905175948	emb|LN590713.1| Cyprinus carpio genome assembly common carp genome ,scaffold LG20
File_R_cluster_1_biclust_result_1_bclustnum_19233_kamer_1_number_1	emb|LN590674.1| Cyprinus carpio genome assembly common carp genome ,scaffold LG42	6.622754941	6.98918779	6.341739303	3.799552831	3.821051799	3.767249225	3.73490628	3.550367106	2.67664209	0	2.713833446	2.228923483	1.849216727	1.568615918	1.928960163	2.210602471	3.331168259	3.046007049	1.076870983	1.603623039	1.786916092	4.082609306	3.868420064	3.837299459	4.564801214	4.250563103	4.369264291	2.562716096	2.28356434	2.203645033	emb|LN590674.1| Cyprinus carpio genome assembly common carp genome ,scaffold LG42
File_R_cluster_1_biclust_result_1_bclustnum_192624_kamer_1_number_1	emb|LN590705.1| Cyprinus carpio genome assembly common carp genome ,scaffold LG11	6.183804502	6.399832106	6.385066229	1.376506617	1.319604194	0.693147181	0	0	0.693147181	0	0.693147181	1.283641288	0	0	0	0	0	1.09002889	0.693147181	0	0.693147181	0	0	0	3.398202903	3.258096538	3.3299126	0.693147181	0.693147181	1.76766143	emb|LN590705.1| Cyprinus carpio genome assembly common carp genome ,scaffold LG11
File_R_cluster_1_biclust_result_1_bclustnum_193323_kamer_1_number_1	emb|LN590686.1| Cyprinus carpio genome assembly common carp genome ,scaffold LG35	0	0	0	0	0	0	0	0	0	0.693147181	0	0	5.965674833	5.972197626	6.015459355	1.16315081	0.693147181	1.014730555	0	0.693147181	0	1.833432302	1.581464273	1.686398954	0.693147181	0	0	3.821518261	3.711714244	3.831077557	emb|LN590686.1| Cyprinus carpio genome assembly common carp genome ,scaffold LG35
File_R_cluster_1_biclust_result_1_bclustnum_19490_kamer_1_number_1	emb|LN590674.1| Cyprinus carpio genome assembly common carp genome ,scaffold LG42	6.366697226	6.578044929	6.678193676	2.266412689	3.36729583	2.937488565	1.830473644	2.02363677	1.663228885	0	1.218343056	1.035242862	0	0	0	0	1.080431346	0.693147181	1.299283893	0.693147181	1.662081595	0	0	0	3.074760621	3.436107536	3.473108657	1.408767439	1.675620706	1.738650492	emb|LN590674.1| Cyprinus carpio genome assembly common carp genome ,scaffold LG42
File_R_cluster_1_biclust_result_1_bclustnum_195056_kamer_1_number_1	emb|LN590679.1| Cyprinus carpio genome assembly common carp genome ,scaffold LG24	0	0	0.693147181	0	0	0	0	0	0	0	0	0	0.693147181	1.076870983	0	1.569632068	0	1.483668319	0	0	0	1.274890622	0.988332285	1.609437912	0	0	0	7.999722203	7.97866401	7.975798388	emb|LN590679.1| Cyprinus carpio genome assembly common carp genome ,scaffold LG24
File_R_cluster_1_biclust_result_1_bclustnum_1955_kamer_1_number_1	emb|LN590705.1| Cyprinus carpio genome assembly common carp genome ,scaffold LG11	6.213483466	6.520540123	6.179846867	2.894170091	1.139434283	1.164861845	0.693147181	0.693147181	0.885691308	0	1.7848859	1.442882612	0	0	0	0.693147181	0.693147181	0.693147181	0	0	0	0.693147181	0	0	3.032710089	2.750074672	2.814504119	1.32175584	0	0.693147181	emb|LN590705.1| Cyprinus carpio genome assembly common carp genome ,scaffold LG11
File_R_cluster_1_biclust_result_1_bclustnum_197934_kamer_1_number_1	emb|LN591055.1| Cyprinus carpio genome assembly common carp genome ,scaffold 000001389	6.447532461	6.66735366	6.830691713	2.762803503	2.560949059	2.594478286	2.026096143	0.993733139	1.461329939	0	1.936589705	1.339773869	0	0	0.693147181	0	1.312187543	0	0	0	0	0	0	0.693147181	3.36729583	3.33544568	3.394682875	1.351203309	0.86567931	0.693147181	emb|LN591055.1| Cyprinus carpio genome assembly common carp genome ,scaffold 000001389
File_R_cluster_1_biclust_result_1_bclustnum_1992_kamer_1_number_1	emb|LN590698.1| Cyprinus carpio genome assembly common carp genome ,scaffold LG17	0	0	0.879734626	0	0	0	0	0	0	7.415415899	0	0	0	0	0	0	0	0	0	0	0	0	0	0	0.693147181	0	0	0	0	0	emb|LN590698.1| Cyprinus carpio genome assembly common carp genome ,scaffold LG17
File_R_cluster_1_biclust_result_1_bclustnum_2007_kamer_1_number_1	emb|LN590705.1| Cyprinus carpio genome assembly common carp genome ,scaffold LG11	4.912154761	5.10225382	5.054090618	4.407048461	5.634739602	5.535308595	4.251002097	4.230377823	1.098612289	0	10.01923741	9.980397666	1.264598367	1.273965176	1.809617396	1.945910149	1.278405652	0.693147181	0.693147181	0.693147181	0.913386519	0	0	0	2.445862588	6.936381608	2.609017769	1.704748092	1.358894901	0.993803473	emb|LN590705.1| Cyprinus carpio genome assembly common carp genome ,scaffold LG11
File_R_cluster_1_biclust_result_1_bclustnum_2009_kamer_1_number_1	emb|LN590705.1| Cyprinus carpio genome assembly common carp genome ,scaffold LG11	7.8167555	7.906724012	6.733729219	3.808272304	4.404773453	4.414465993	3.869689452	3.819780515	3.765907623	0	3.502200417	3.544105096	2.20698127	2.143735892	2.032294901	2.855032391	3.598421234	2.937838295	1.449473365	2.162822901	2.562716096	2.851428784	2.411995397	2.259234905	4.605025175	4.764274292	4.482429506	2.589176571	2.268683886	2.46292515	emb|LN590705.1| Cyprinus carpio genome assembly common carp genome ,scaffold LG11
File_R_cluster_1_biclust_result_1_bclustnum_201032_kamer_1_number_1	emb|LN590674.1| Cyprinus carpio genome assembly common carp genome ,scaffold LG42	6.046887428	6.787700665	6.224075144	3.023269617	3.134363142	3.406377276	1.800380534	1.595831767	1.098612289	0	1.085540558	1.265665091	1.054935529	1.297064161	0	0	1.531476371	0	0	0.693147181	1.072637855	0	0	0	3.471401075	3.417087135	4.597870609	1.086637543	0.693147181	0	emb|LN590674.1| Cyprinus carpio genome assembly common carp genome ,scaffold LG42
File_R_cluster_1_biclust_result_1_bclustnum_201471_kamer_1_number_1	emb|LN590674.1| Cyprinus carpio genome assembly common carp genome ,scaffold LG42	7.396832103	7.466845214	7.370501386	4.947283624	5.962244263	6.007185326	4.753814304	5.032729412	3.852079776	0	3.967101925	3.910724162	0	1.070442555	0	1.737692155	2.141573263	0.693147181	1.058605934	1.034368835	1.849866415	0	0	0	5.272799539	5.293174163	5.44780146	2.527015816	1.871802177	1.524339613	emb|LN590674.1| Cyprinus carpio genome assembly common carp genome ,scaffold LG42
File_R_cluster_1_biclust_result_1_bclustnum_201478_kamer_1_number_1	emb|LN591305.1| Cyprinus carpio genome assembly common carp genome ,scaffold 000001301	6.094682018	5.900650495	6.154949385	1.222760211	1.081516993	0.843087581	0	0.865759252	1.098612289	0	0.693147181	0.693147181	0.693147181	0	0	1.046785519	1.852914147	0.693147181	0	0.693147181	0	0	0	0	0	2.061159183	0.693147181	0	1.070908731	1.064710737	emb|LN591305.1| Cyprinus carpio genome assembly common carp genome ,scaffold 000001301
File_R_cluster_1_biclust_result_1_bclustnum_2043_kamer_1_number_1	emb|LN590674.1| Cyprinus carpio genome assembly common carp genome ,scaffold LG42	6.017833802	6.092157939	5.899042194	4.761532704	3.026886889	2.933723882	2.450116773	2.645287879	1.975162386	0	2.267810402	1.290983181	0	0	0	0	0	0	0.693147181	0	0.86567931	0	0	0	3.266236396	3.258096538	3.003204288	3.014902348	2.233139619	3.023673263	emb|LN590674.1| Cyprinus carpio genome assembly common carp genome ,scaffold LG42
File_R_cluster_1_biclust_result_1_bclustnum_20473_kamer_1_number_1	emb|LN590705.1| Cyprinus carpio genome assembly common carp genome ,scaffold LG11	6.722858409	7.31220654	6.977915469	1.086637543	1.768502784	1.364506214	0.85629866	0.998530409	1.335001067	0	1.476991645	1.614079125	0	0.693147181	0	0.693147181	0	1.013816637	0.693147181	0	0	0	0	0.693147181	2.276609633	1.984922049	2.755029202	1.086637543	0	0.693147181	emb|LN590705.1| Cyprinus carpio genome assembly common carp genome ,scaffold LG11
File_R_cluster_1_biclust_result_1_bclustnum_204826_kamer_1_number_1	emb|LN590674.1| Cyprinus carpio genome assembly common carp genome ,scaffold LG42	7.020521306	7.1244219	7.009788265	2.942953666	3.008327618	2.832265836	2.653044762	1.961879107	2.157315361	0	1.961879107	1.909020887	0	0	1.057370067	1.098612289	1.041452698	0.693147181	0	0.693147181	0.693147181	0.693147181	1.076870983	0.693147181	4.380088508	3.614716096	4.421383156	2.493089743	2.145849408	2.416922198	emb|LN590674.1| Cyprinus carpio genome assembly common carp genome ,scaffold LG42
File_R_cluster_1_biclust_result_1_bclustnum_206526_kamer_1_number_1	emb|LN590674.1| Cyprinus carpio genome assembly common carp genome ,scaffold LG42	6.672477151	6.757670489	7.108816807	2.82282427	3.449053777	3.281572651	1.745238977	2.124255956	2.810907587	0	1.510066095	1.699050071	0	0	0	0.693147181	1.03691772	0.693147181	0.693147181	0.693147181	0.693147181	0	0	0.693147181	2.652847521	2.348797652	3.085682661	2.914972225	1.991807698	2.152466606	emb|LN590674.1| Cyprinus carpio genome assembly common carp genome ,scaffold LG42
File_R_cluster_1_biclust_result_1_bclustnum_2090_kamer_1_number_1	emb|LN590698.1| Cyprinus carpio genome assembly common carp genome ,scaffold LG17	0	0	0	0.693147181	0	0	0	0	0	8.162724384	0	0	0	0	0	0	0	0	0	0	0	0	0	0	0	0	0.693147181	0	0	0	emb|LN590698.1| Cyprinus carpio genome assembly common carp genome ,scaffold LG17
File_R_cluster_1_biclust_result_1_bclustnum_210134_kamer_1_number_1	emb|LN590674.1| Cyprinus carpio genome assembly common carp genome ,scaffold LG42	6.810887487	6.710111332	6.366516838	1.989354075	1.302075445	1.80072747	1.055363741	0.693147181	0.693147181	0	0.693147181	0.693147181	0	0.693147181	1.048350042	1.92181211	1.862140266	1.041452698	1.061398361	0	0.693147181	0	0	0	1.356693033	1.669744366	0.908036761	0	1.049096361	0.693147181	emb|LN590674.1| Cyprinus carpio genome assembly common carp genome ,scaffold LG42
File_R_cluster_1_biclust_result_1_bclustnum_211533_kamer_1_number_1	emb|LN590713.1| Cyprinus carpio genome assembly common carp genome ,scaffold LG20	6.778067917	6.679341615	6.387385925	3.127308631	2.324266347	3.029988762	2.260325607	2.079441542	1.574347378	0	0.89451536	1.317300597	0.693147181	0.693147181	0.693147181	1.335001067	0	1.060872345	1.068757709	0.693147181	1.067840318	0	0	0	2.320236388	2.08286069	1.553085527	1.974841848	1.910818727	2.583997552	emb|LN590713.1| Cyprinus carpio genome assembly common carp genome ,scaffold LG20
File_R_cluster_1_biclust_result_1_bclustnum_213681_kamer_1_number_1	emb|LN590674.1| Cyprinus carpio genome assembly common carp genome ,scaffold LG42	6.771713309	6.737674892	6.825731444	1.54933328	1.681758574	1.016639108	1.093907907	2.058387707	1.368275492	0	2.462669562	1.744356842	0	0	0	1.089043318	0.693147181	1.068757709	0	0	0.693147181	1.556640329	0	1.069626222	2.098358973	2.604746827	1.92181211	0.867218128	0	0.693147181	emb|LN590674.1| Cyprinus carpio genome assembly common carp genome ,scaffold LG42
File_R_cluster_1_biclust_result_1_bclustnum_21653_kamer_1_number_1	emb|LN590705.1| Cyprinus carpio genome assembly common carp genome ,scaffold LG11	6.777728595	6.787404073	6.756426447	1.459626139	2.795865699	3.129174287	1.772247	1.820746911	1.986484341	0	4.022501203	4.296002952	3.33220451	3.44468143	3.670768944	3.501410673	3.526360525	3.410801118	2.746199828	2.916266899	3.62973171	1.301953053	1.536234762	1.048350042	3.108672491	3.365293827	2.915026429	1.483838408	1.643628689	1.846675278	emb|LN590705.1| Cyprinus carpio genome assembly common carp genome ,scaffold LG11
File_R_cluster_1_biclust_result_1_bclustnum_21860_kamer_1_number_1	emb|LN590705.1| Cyprinus carpio genome assembly common carp genome ,scaffold LG11	7.910487892	7.713025061	6.111403036	2.416172673	2.81079931	2.37927758	1.9963751	1.238165514	2.958829672	0	2.629699395	2.324091171	1.370546004	1.553347869	1.971552833	1.370546004	3.094722039	1.46228039	0	0	1.660296412	1.045123604	1.86698289	1.707676527	3.350665201	2.713833446	3.125997087	2.068512032	1.941760121	1.954157475	emb|LN590705.1| Cyprinus carpio genome assembly common carp genome ,scaffold LG11
File_R_cluster_1_biclust_result_1_bclustnum_21883_kamer_1_number_1	emb|LN590674.1| Cyprinus carpio genome assembly common carp genome ,scaffold LG42	6.515904573	6.318358919	6.617993713	3.570081841	3.127558463	3.015662344	1.821612726	2.143520191	2.314633222	0	1.87280014	2.813928583	0	0	0	0	0.693147181	0	0.693147181	0	0.693147181	0	0	0	3.922616694	3.490587039	3.541147712	3.025917093	2.533045808	2.085914298	emb|LN590674.1| Cyprinus carpio genome assembly common carp genome ,scaffold LG42
File_R_cluster_1_biclust_result_1_bclustnum_219506_kamer_1_number_1	emb|LN590712.1| Cyprinus carpio genome assembly common carp genome ,scaffold LG2	0	0	0	0	0	0	0	0	0	7.497207223	0	0	0	0	0	0	0	0	0	0	0	0	0	0	0.693147181	0	0	0	0	0	emb|LN590712.1| Cyprinus carpio genome assembly common carp genome ,scaffold LG2
File_R_cluster_1_biclust_result_1_bclustnum_22004_kamer_1_number_1	emb|LN590674.1| Cyprinus carpio genome assembly common carp genome ,scaffold LG42	9.033903864	9.079815883	8.948212979	2.414287457	2.837023722	2.723516643	2.299984715	1.874794618	2.205845091	0	3.999271688	4.180164396	1.066350771	1.578184575	1.760576632	2.049389468	3.16733829	2.378570659	1.332948963	2.126994035	2.185612978	0	1.071943141	0	6.388932765	6.098395579	6.20240393	2.232664649	2.338303526	2.266890556	emb|LN590674.1| Cyprinus carpio genome assembly common carp genome ,scaffold LG42
File_R_cluster_1_biclust_result_1_bclustnum_220173_kamer_1_number_1	emb|LN590674.1| Cyprinus carpio genome assembly common carp genome ,scaffold LG42	6.790821383	7.046133656	6.802440318	1.210797463	1.932116886	1.945910149	1.202602866	1.21892841	1.079918646	0	1.673120442	1.584470812	1.079381898	1.069626222	1.089043318	1.85020289	2.405286075	2.082814597	0.693147181	0	0.693147181	0	0.693147181	0	1.020524613	1.710956056	1.236761337	1.210797463	1.283347597	0.693147181	emb|LN590674.1| Cyprinus carpio genome assembly common carp genome ,scaffold LG42
File_R_cluster_1_biclust_result_1_bclustnum_220356_kamer_1_number_1	emb|LN596222.1| Cyprinus carpio genome assembly common carp genome ,scaffold 000001964	0.693147181	0.794245124	1.386294361	0.693147181	0	0	0.693147181	0	0	6.723953828	5.329903239	5.176658078	0	0	0.693147181	0	0	0	0	0	0	0	0.693147181	0.693147181	0.693147181	0.693147181	0.693147181	0	0	0.693147181	emb|LN596222.1| Cyprinus carpio genome assembly common carp genome ,scaffold 000001964
File_R_cluster_1_biclust_result_1_bclustnum_221500_kamer_1_number_1	emb|LN592578.1| Cyprinus carpio genome assembly common carp genome ,scaffold 000006258	0.693147181	0.693147181	0.693147181	0.693147181	1.071583616	0	0	0.693147181	0.693147181	7.168364158	1.512856525	0.693147181	0	0	0	0	0	0	0	0	0	0	1.375822219	0	0.693147181	0	0.693147181	0	0	0.693147181	emb|LN592578.1| Cyprinus carpio genome assembly common carp genome ,scaffold 000006258
File_R_cluster_1_biclust_result_1_bclustnum_222221_kamer_1_number_1	emb|LN590705.1| Cyprinus carpio genome assembly common carp genome ,scaffold LG11	6.95248961	6.800253584	6.403277796	2.541720097	1.875240873	2.188897783	1.386294361	1.653240421	1.482283856	0	2.726780358	3.062133122	0	0	0	1.386294361	1.296681421	1.596014216	0.693147181	0	0.693147181	0.693147181	1.075353897	1.017644431	1.897865707	3.21168604	1.336570887	2.302585093	1.769116713	1.454789109	emb|LN590705.1| Cyprinus carpio genome assembly common carp genome ,scaffold LG11
File_R_cluster_1_biclust_result_1_bclustnum_22276_kamer_1_number_1	emb|LN590698.1| Cyprinus carpio genome assembly common carp genome ,scaffold LG17	0	0	0	0	0	0	0	0	0	7.348484566	0	0	0	0	0	0	0	0	0	0	0	0	0	0	0	0.693147181	0	0	0	0	emb|LN590698.1| Cyprinus carpio genome assembly common carp genome ,scaffold LG17
File_R_cluster_1_biclust_result_1_bclustnum_22408_kamer_1_number_1	emb|LN590705.1| Cyprinus carpio genome assembly common carp genome ,scaffold LG11	6.907784279	7.099292573	6.57839807	3.649915108	4.521477659	4.468696182	3.341344753	3.466629254	2.560547375	0	3.290530218	3.068052935	2.010727649	2.03432126	2.004750323	2.659259037	3.597021807	2.93562658	0.693147181	1.319850025	1.693319396	3.02194568	3.054887581	3.044522438	4.743313428	4.743444065	5.022939289	2.936136185	1.757857918	1.904238091	emb|LN590705.1| Cyprinus carpio genome assembly common carp genome ,scaffold LG11
File_R_cluster_1_biclust_result_1_bclustnum_22454_kamer_1_number_1	emb|LN590674.1| Cyprinus carpio genome assembly common carp genome ,scaffold LG42	5.924052568	5.815377515	6.243158626	3.101343758	2.794496974	2.608922076	2.096916708	0.867764133	1.643075763	0	1.721862618	1.522196691	0.693147181	0	0	0	0	0	1.087052396	0.693147181	0.693147181	0	0	0	3.170643105	3.104187496	3.048130208	2.343130889	1.791759469	2.648859135	emb|LN590674.1| Cyprinus carpio genome assembly common carp genome ,scaffold LG42
File_R_cluster_1_biclust_result_1_bclustnum_225052_kamer_1_number_1	emb|LN590674.1| Cyprinus carpio genome assembly common carp genome ,scaffold LG42	6.073549015	6.170612323	6.240782539	1.633796811	1.633796811	2.069114652	0.868595168	1.210797463	1.017807068	0	1.160578755	1.210797463	0	0	0	1.709786288	1.245594479	0	0	0.693147181	0.693147181	0	0	0	2.375223844	2.203293899	2.246231649	0.862830882	1.351203309	0.693147181	emb|LN590674.1| Cyprinus carpio genome assembly common carp genome ,scaffold LG42
File_R_cluster_1_biclust_result_1_bclustnum_228778_kamer_1_number_1	emb|LN590674.1| Cyprinus carpio genome assembly common carp genome ,scaffold LG42	6.648634748	6.929898303	6.713646121	1.054649952	1.150388466	0.90570692	0.874242986	0	1.174371991	0	0.693147181	1.186003316	0	0	1.020358813	2.194045084	2.751537441	0	0.693147181	0.693147181	0.693147181	0.693147181	0	0	1.044008257	1.220257486	0	0.693147181	0.693147181	0.693147181	emb|LN590674.1| Cyprinus carpio genome assembly common carp genome ,scaffold LG42
File_R_cluster_1_biclust_result_1_bclustnum_2295_kamer_1_number_1	emb|LN590698.1| Cyprinus carpio genome assembly common carp genome ,scaffold LG17	0	0	0	0	0	0	0	0	0	9.511429665	0	0	0	0	0	0	0	0	0	0	0	0	0	0	0	0	0	0	0	0	emb|LN590698.1| Cyprinus carpio genome assembly common carp genome ,scaffold LG17
File_R_cluster_1_biclust_result_1_bclustnum_229611_kamer_1_number_1	emb|LN590713.1| Cyprinus carpio genome assembly common carp genome ,scaffold LG20	6.265329729	6.113226324	5.272019591	3.421575007	2.976427122	2.983897518	2.316283835	1.928705857	2.610069793	0	1.589235205	1.039424759	0	0	0	0	0	1.098612289	0	1.331806496	0.872731662	0	0	0	3.567045098	2.559279468	3.384390263	2.501919441	2.271813466	2.714482801	emb|LN590713.1| Cyprinus carpio genome assembly common carp genome ,scaffold LG20
File_R_cluster_1_biclust_result_1_bclustnum_230433_kamer_1_number_1	emb|LN590674.1| Cyprinus carpio genome assembly common carp genome ,scaffold LG42	5.754085779	6.138025066	5.437809707	2.649983139	3.099398354	2.890371758	2.434963321	2.237430916	2.232493046	0	2.003556222	2.662948227	0	1.051545139	0	1.602270286	3.433219168	2.024381953	0	1.029619417	1.186903957	0.693147181	0	1.340624698	2.406251174	4.26224598	3.148783778	1.606357172	0.881856625	2.10787957	emb|LN590674.1| Cyprinus carpio genome assembly common carp genome ,scaffold LG42
File_R_cluster_1_biclust_result_1_bclustnum_231282_kamer_1_number_1	emb|LN590674.1| Cyprinus carpio genome assembly common carp genome ,scaffold LG42	5.294294285	5.53302974	5.326919401	3.147281	3.426627933	3.132193121	7.081683376	7.154357511	7.248752975	0	2.514756672	2.336839649	1.087440112	0.693147181	1.049821124	0	2.919569114	1.750697863	0	1.180984588	1.098612289	1.925290445	2.131627125	1.049821124	4.196061448	4.824426191	3.976277736	1.86712974	2.515985332	2.17509598	emb|LN590674.1| Cyprinus carpio genome assembly common carp genome ,scaffold LG42
File_R_cluster_1_biclust_result_1_bclustnum_231434_kamer_1_number_1	emb|LN591055.1| Cyprinus carpio genome assembly common carp genome ,scaffold 000001389	5.983989176	5.965256599	6.014949113	5.894703065	5.788576952	6.559676142	4.026665114	4.325366332	4.489017196	4.412360622	4.680759917	4.713522223	0	0.693147181	0.693147181	0.693147181	0.693147181	0.693147181	2.992582318	2.771794657	3.050897313	0	1.098612289	0.693147181	4.779988665	4.59619402	4.809807549	5.663276402	5.64139985	5.57504339	emb|LN591055.1| Cyprinus carpio genome assembly common carp genome ,scaffold 000001389
File_R_cluster_1_biclust_result_1_bclustnum_231760_kamer_1_number_1	emb|LN590674.1| Cyprinus carpio genome assembly common carp genome ,scaffold LG42	6.401446107	6.426488457	6.432388494	1.207601214	2.738430672	2.160057931	0.97344959	1.638851073	1.027517209	0	2.449460803	2.677742185	0.693147181	0.693147181	1.520772805	2.526943906	2.235690732	1.832581464	1.72066439	1.048350042	1.176942762	0	0	0.693147181	1.197983907	2.213671909	1.499089422	0.997144188	0.693147181	1.054649952	emb|LN590674.1| Cyprinus carpio genome assembly common carp genome ,scaffold LG42
File_R_cluster_1_biclust_result_1_bclustnum_233251_kamer_1_number_1	emb|LN598497.1| Cyprinus carpio genome assembly common carp genome ,scaffold 000002514	6.760544463	6.434626772	6.65031139	3.980148834	3.019814944	3.777483104	2.788092909	2.628285233	1.9750389	0	1.662978679	1.763217666	0	0	1.043043199	0	1.044546734	0	0.693147181	0.693147181	0	0	0	0	3.444017379	3.956518245	3.648708289	1.91002387	2.782619495	2.738689326	emb|LN598497.1| Cyprinus carpio genome assembly common carp genome ,scaffold 000002514
File_R_cluster_1_biclust_result_1_bclustnum_23554_kamer_1_number_1	emb|LN590674.1| Cyprinus carpio genome assembly common carp genome ,scaffold LG42	5.93466401	6.254442085	6.009132545	3.493831256	3.010832686	2.95732403	1.612331721	1.711313764	2.379546134	0	1.418381518	1.331545102	0	1.098612289	1.704748092	1.908484167	2.328337631	1.926009145	0.907294386	0.859644187	1.47590652	0	0	0.693147181	3.0949892	3.990593861	3.151744078	1.829678053	2.472758155	2.093234727	emb|LN590674.1| Cyprinus carpio genome assembly common carp genome ,scaffold LG42
File_R_cluster_1_biclust_result_1_bclustnum_23756_kamer_1_number_1	emb|LN590713.1| Cyprinus carpio genome assembly common carp genome ,scaffold LG20	8.41499877	8.526884083	8.250627915	4.228031568	3.683640756	3.588481604	3.491973054	3.304095264	3.040246643	0	3.358509063	3.433022223	1.098612289	0.693147181	1.609437912	0	1.093623197	0	0.693147181	0.870481321	0.906070685	1.609437912	0.693147181	1.386294361	3.072554416	4.416500523	3.383630653	3.23545365	3.530302744	3.146464259	emb|LN590713.1| Cyprinus carpio genome assembly common carp genome ,scaffold LG20
File_R_cluster_1_biclust_result_1_bclustnum_237657_kamer_1_number_1	emb|LN590674.1| Cyprinus carpio genome assembly common carp genome ,scaffold LG42	7.039248346	7.262341042	7.24082889	3.22493344	3.164778603	2.623566536	1.845159626	1.953116975	1.829031169	0	2.037432645	2.280831183	0.693147181	0	0	0	0.693147181	0	0.693147181	1.098612289	0	0	0	0	3.872781012	3.776970456	4.235023475	2.724081018	2.299131135	1.757857918	emb|LN590674.1| Cyprinus carpio genome assembly common carp genome ,scaffold LG42
File_R_cluster_1_biclust_result_1_bclustnum_240941_kamer_1_number_1	emb|LN590674.1| Cyprinus carpio genome assembly common carp genome ,scaffold LG42	6.69060374	6.618373095	6.276282522	1.531476371	1.319604194	1.660296412	0	0	1.098612289	0	0.869496774	1.536413353	0	1.076870983	0.693147181	0.693147181	0.693147181	0	0.693147181	0.693147181	0.693147181	0	0	0	1.368275492	1.014193911	1.098612289	0.909370845	0.693147181	1.075353897	emb|LN590674.1| Cyprinus carpio genome assembly common carp genome ,scaffold LG42
File_R_cluster_1_biclust_result_1_bclustnum_24229_kamer_1_number_1	emb|LN590674.1| Cyprinus carpio genome assembly common carp genome ,scaffold LG42	5.830556085	5.592366625	6.169123166	3.124714585	1.555980172	1.945910149	1.322667424	0.862830882	0.693147181	0	1.386294361	1.022745848	0.693147181	0	0	0.693147181	0.693147181	0.693147181	0	0	1.062895297	0	0	0	2.930644268	2.823495692	2.970763123	0.862830882	0.885691308	0	emb|LN590674.1| Cyprinus carpio genome assembly common carp genome ,scaffold LG42
File_R_cluster_1_biclust_result_1_bclustnum_242294_kamer_1_number_1	emb|LN590702.1| Cyprinus carpio genome assembly common carp genome ,scaffold LG50	7.260473405	7.553863262	6.832026918	3.625617451	3.366350556	3.366816405	2.629086356	2.860244683	2.748872196	0	2.405340218	2.152080757	1.632038582	1.848917698	1.698234196	2.494658941	2.667040689	2.833213344	1.266369972	1.455286233	1.232143265	2.857148137	3.047318525	3.277144733	3.698084458	3.71590836	3.599373149	1.995538057	2.165873793	2.46148448	emb|LN590702.1| Cyprinus carpio genome assembly common carp genome ,scaffold LG50
File_R_cluster_1_biclust_result_1_bclustnum_244_kamer_1_number_1	emb|LN590707.1| Cyprinus carpio genome assembly common carp genome ,scaffold LG30	0.693147181	0	0	0	0	0	0	0	0	10.07145238	0	0	0	0	0	0	0	0	0	0	0	0	0	0	0	0	1.098612289	0	0	0	emb|LN590707.1| Cyprinus carpio genome assembly common carp genome ,scaffold LG30
File_R_cluster_1_biclust_result_1_bclustnum_24442_kamer_1_number_1	emb|LN590674.1| Cyprinus carpio genome assembly common carp genome ,scaffold LG42	6.068689442	6.353550575	6.058220919	1.054649952	1.16315081	1.516695234	1.03471001	0.869496774	0	0	1.03471001	0.693147181	0	0	0.693147181	0	0	0.693147181	0	0	0	0	0	0	1.371906348	1.779783037	2.016806541	0	0	0.693147181	emb|LN590674.1| Cyprinus carpio genome assembly common carp genome ,scaffold LG42
File_R_cluster_1_biclust_result_1_bclustnum_245535_kamer_1_number_1	emb|LN590674.1| Cyprinus carpio genome assembly common carp genome ,scaffold LG42	6.954638865	7.068299761	6.963199447	2.068669986	1.704748092	1.352647087	1.213784512	0.693147181	0.90570692	0	2.16218905	1.429466392	1.08780072	0	0	0	1.938363171	1.077558879	0	0.693147181	0.693147181	0.693147181	0.693147181	0	4.324412087	3.707369946	4.120752775	0.880356771	1.3334525	1.505640619	emb|LN590674.1| Cyprinus carpio genome assembly common carp genome ,scaffold LG42
File_R_cluster_1_biclust_result_1_bclustnum_247010_kamer_1_number_1	emb|LN590674.1| Cyprinus carpio genome assembly common carp genome ,scaffold LG42	7.382043466	7.331335317	7.39767795	6.07914799	6.169110607	5.999712935	4.173697801	4.34902554	3.73303987	0	4.935437498	4.932320537	0	0	0	0	0	0	2.747078588	2.950703526	3.028760778	0	0	0	5.54026697	6.551847184	5.606132894	4.165160216	4.043051268	3.433987204	emb|LN590674.1| Cyprinus carpio genome assembly common carp genome ,scaffold LG42
File_R_cluster_1_biclust_result_1_bclustnum_248239_kamer_1_number_1	emb|LN590705.1| Cyprinus carpio genome assembly common carp genome ,scaffold LG11	6.077610133	6.273961324	6.037281247	1.143263741	1.536413353	1.134490885	0.693147181	0.693147181	0.693147181	0	1.465283437	1.021652048	0	0	0	0	1.02528145	0	0	0	0.888121683	0	0	0	1.812099534	2.797951842	1.951764408	1.098612289	1.098612289	0.874242986	emb|LN590705.1| Cyprinus carpio genome assembly common carp genome ,scaffold LG11
File_R_cluster_1_biclust_result_1_bclustnum_248580_kamer_1_number_1	emb|LN597789.1| Cyprinus carpio genome assembly common carp genome ,scaffold 000003735	0	0	0.693147181	0	0	0	0	0	0	7.526184301	0	0	0	0	0	0	0	0	0	0	0	0	0	0	0	0.693147181	0	0	0	0	emb|LN597789.1| Cyprinus carpio genome assembly common carp genome ,scaffold 000003735
File_R_cluster_1_biclust_result_1_bclustnum_249_kamer_1_number_1	emb|LN590698.1| Cyprinus carpio genome assembly common carp genome ,scaffold LG17	8.120205052	8.21424857	8.192694979	5.046041047	3.929550498	3.87029435	3.946774129	3.852918228	3.531886405	0	4.63570909	4.577546131	0.693147181	0.693147181	0.693147181	2.071072872	3.256995933	1.941820369	0.693147181	1.335001067	1.287354853	1.791759469	2.319114723	1.386294361	5.364282994	4.833746951	5.418222593	3.263099387	2.937552161	2.692469449	emb|LN590698.1| Cyprinus carpio genome assembly common carp genome ,scaffold LG17
File_R_cluster_1_biclust_result_1_bclustnum_24978_kamer_1_number_1	emb|LN590705.1| Cyprinus carpio genome assembly common carp genome ,scaffold LG11	6.84088444	7.25832764	6.962991291	1.075353897	1.001983907	0	0	1.145731216	0	0	1.178654996	1.252762968	1.016374952	0.693147181	0	0	1.072637855	0.693147181	0	0	0	0	0	0	2.074495581	0.997144188	2.653058849	0.693147181	1.554628972	0	emb|LN590705.1| Cyprinus carpio genome assembly common carp genome ,scaffold LG11
File_R_cluster_1_biclust_result_1_bclustnum_2513_kamer_1_number_1	emb|LN590698.1| Cyprinus carpio genome assembly common carp genome ,scaffold LG17	0	0	0	0	0	0	0	0	0	8.570081613	0	0	0	0	0	0	0	0	0	0	0	0	0	0	0	0	0	0	0	0	emb|LN590698.1| Cyprinus carpio genome assembly common carp genome ,scaffold LG17
File_R_cluster_1_biclust_result_1_bclustnum_25212_kamer_1_number_1	emb|LN590698.1| Cyprinus carpio genome assembly common carp genome ,scaffold LG17	6.597087037	6.566170194	6.754254388	2.991176914	2.825714711	2.559441912	2.026332125	1.475090187	2.036882362	0	1.009001172	1.302211419	0	0	0	0	0.693147181	0	1.31094562	0	0.693147181	0.693147181	0.693147181	0	1.887069649	2.690761611	2.026266214	2.414287457	2.114532344	1.468533117	emb|LN590698.1| Cyprinus carpio genome assembly common carp genome ,scaffold LG17
File_R_cluster_1_biclust_result_1_bclustnum_252610_kamer_1_number_1	emb|LN590713.1| Cyprinus carpio genome assembly common carp genome ,scaffold LG20	5.855745048	6.252441311	5.747939701	2.900129551	2.981663775	2.729387598	1.683125082	1.846601127	1.425938062	0	1.360222423	1.579584707	0	0	0	0	0	0.693147181	1.076870983	0	0.693147181	0	0	0	2.856303526	2.900937961	2.939786066	2.131377942	1.756667554	2.315829991	emb|LN590713.1| Cyprinus carpio genome assembly common carp genome ,scaffold LG20
File_R_cluster_1_biclust_result_1_bclustnum_253073_kamer_1_number_1	emb|LN590674.1| Cyprinus carpio genome assembly common carp genome ,scaffold LG42	6.784778278	7.02525383	6.840416039	2.953643852	2.721657205	2.592631867	1.604017247	2.079441542	2.577690915	0	1.709650601	1.920492702	0	0	1.058605934	0	2.530843541	1.523496508	0.906406039	1.045123604	0.693147181	1.347678265	1.945910149	0.693147181	2.185139625	2.439996449	2.147984145	2.166601553	2.49610208	2.966988089	emb|LN590674.1| Cyprinus carpio genome assembly common carp genome ,scaffold LG42
File_R_cluster_1_biclust_result_1_bclustnum_25362_kamer_1_number_1	emb|LN590674.1| Cyprinus carpio genome assembly common carp genome ,scaffold LG42	7.477366658	7.363831115	7.687822999	3.49256343	3.907597226	3.735192744	1.76766143	1.704748092	2.185612978	0	3.698250409	3.436915172	0.693147181	0.693147181	0.693147181	1.089309148	2.425006245	0.693147181	0.922157489	1.854673234	1.697730801	0	0	0	4.374039825	5.114803099	4.456157285	1.932837936	2.023753076	1.650986683	emb|LN590674.1| Cyprinus carpio genome assembly common carp genome ,scaffold LG42
File_R_cluster_1_biclust_result_1_bclustnum_253652_kamer_1_number_1	emb|LN590713.1| Cyprinus carpio genome assembly common carp genome ,scaffold LG20	6.905200017	7.029645424	6.973580472	3.286953077	4.051136042	4.127616527	2.469869151	2.631565047	2.130361579	0	2.107042117	1.566747507	0.965080896	0	0	0	0.919270289	0	0.883498909	0.916290732	0	0	0	0	2.197224577	2.031677538	2.404654198	1.697941342	2.619677898	2.613138609	emb|LN590713.1| Cyprinus carpio genome assembly common carp genome ,scaffold LG20
File_R_cluster_1_biclust_result_1_bclustnum_25400_kamer_1_number_1	emb|LN590705.1| Cyprinus carpio genome assembly common carp genome ,scaffold LG11	6.14693721	6.112234229	6.087896824	1.207669961	1.395028606	1.325862065	0	0.693147181	1.335001067	0	2.275049443	2.343703044	0	0	0.693147181	0	1.098612289	0.693147181	0	0	0.923671427	0	0	0	1.738949235	1.897120485	2.038490633	1.367603266	1.203971804	0	emb|LN590705.1| Cyprinus carpio genome assembly common carp genome ,scaffold LG11
File_R_cluster_1_biclust_result_1_bclustnum_255998_kamer_1_number_1	emb|LN590674.1| Cyprinus carpio genome assembly common carp genome ,scaffold LG42	7.294384093	7.546974118	6.382220335	1.32745424	1.609437912	1.899972413	0.693147181	1.084222585	1.774952351	0	1.331233452	1.189582763	1.548812791	0	1.871802177	1.874130234	3.200939934	1.981001469	0.693147181	0.693147181	1.533929576	1.3334525	0.693147181	0	1.451948666	2.82307982	1.438481131	0	0	1.393411474	emb|LN590674.1| Cyprinus carpio genome assembly common carp genome ,scaffold LG42
File_R_cluster_1_biclust_result_1_bclustnum_256009_kamer_1_number_1	emb|LN590674.1| Cyprinus carpio genome assembly common carp genome ,scaffold LG42	6.367492262	6.466228702	6.472576562	1.978201691	1.985649958	2.350087762	0.888890758	2.079441542	1.129655426	0	2.282106838	2.05377752	0.693147181	0	0.693147181	0.693147181	2.076388135	0.977532575	0.693147181	0.693147181	0.885691308	0.693147181	0	0	2.922144935	3.262245611	2.272404197	1.343733877	0.693147181	1.595048885	emb|LN590674.1| Cyprinus carpio genome assembly common carp genome ,scaffold LG42
File_R_cluster_1_biclust_result_1_bclustnum_256061_kamer_1_number_1	emb|LN590705.1| Cyprinus carpio genome assembly common carp genome ,scaffold LG11	6.809406788	6.876092254	5.924822482	2.927549788	2.352817074	1.782791039	0.907015853	1.459319426	1.480226319	0	1.226445394	0	0	0.693147181	1.087052396	0	2.143520191	1.075353897	0.693147181	0.693147181	0	1.257676591	2.021775352	1.368901478	1.423474532	2.731017749	1.760987498	2.04867043	1.688080872	0.693147181	emb|LN590705.1| Cyprinus carpio genome assembly common carp genome ,scaffold LG11
File_R_cluster_1_biclust_result_1_bclustnum_257_kamer_1_number_1	emb|LN590674.1| Cyprinus carpio genome assembly common carp genome ,scaffold LG42	5.531850756	6.093255951	5.88525367	1.086637543	1.054649952	1.720301061	0	1.319604194	0.693147181	0	0.693147181	1.089043318	0	0	0	0	0	0	0	0	0.693147181	0.693147181	0.693147181	0	1.64222838	2.797452052	3.20601751	0	0.693147181	0.693147181	emb|LN590674.1| Cyprinus carpio genome assembly common carp genome ,scaffold LG42
File_R_cluster_1_biclust_result_1_bclustnum_257037_kamer_1_number_1	emb|LN590674.1| Cyprinus carpio genome assembly common carp genome ,scaffold LG42	8.587767212	8.738450164	8.543862386	5.85220248	6.838702049	6.971753029	5.488937726	5.560681631	5.315543147	0	5.586203168	5.534617983	1.791759469	1.114872702	2.064174339	2.759636453	3.74071735	2.598324617	1.883087488	2.158222685	2.284387517	0	0.693147181	0.693147181	6.266982308	6.341904846	6.163142158	3.158046682	2.80485018	3.046083124	emb|LN590674.1| Cyprinus carpio genome assembly common carp genome ,scaffold LG42
File_R_cluster_1_biclust_result_1_bclustnum_25758_kamer_1_number_1	emb|LN590674.1| Cyprinus carpio genome assembly common carp genome ,scaffold LG42	6.70456753	6.982222472	6.751572703	1.538401526	1.666133886	2.094945728	1.016639108	1.78479024	1.558144618	0	1.187166364	0	1.068757709	0.693147181	0.693147181	1.544517452	2.082155356	1.530745293	0.693147181	0	1.243503085	0.693147181	0	1.058605934	1.403505398	2.387743003	1.287354853	1.071360989	0.693147181	1.011600912	emb|LN590674.1| Cyprinus carpio genome assembly common carp genome ,scaffold LG42
File_R_cluster_1_biclust_result_1_bclustnum_25780_kamer_1_number_1	emb|LN590674.1| Cyprinus carpio genome assembly common carp genome ,scaffold LG42	7.761634293	7.805653908	7.870429472	3.426839137	4.211838667	4.21222389	1.593731205	1.894519106	1.683546742	0	4.291525995	3.999986263	0.693147181	0	1.071943141	2.545531272	2.363828817	1.966600338	0.90321765	1.341558467	1.225479861	0	0	0	4.247195827	4.175385233	4.723237626	1.763217666	1.576050711	1.479240385	emb|LN590674.1| Cyprinus carpio genome assembly common carp genome ,scaffold LG42
File_R_cluster_1_biclust_result_1_bclustnum_26131_kamer_1_number_1	emb|LN590674.1| Cyprinus carpio genome assembly common carp genome ,scaffold LG42	6.727981274	6.81354899	6.663167178	4.565754494	2.432902577	2.809890528	3.061117311	3.58763822	1.553868118	0	3.258096538	3.367761239	0	0	0.693147181	1.768339005	1.049821124	1.527199128	1.231002197	0.693147181	1.098612289	1.089561453	0.693147181	1.098612289	4.502658941	3.933678816	4.403748987	1.334290288	0.693147181	0	emb|LN590674.1| Cyprinus carpio genome assembly common carp genome ,scaffold LG42
File_R_cluster_1_biclust_result_1_bclustnum_261758_kamer_1_number_1	emb|LN590674.1| Cyprinus carpio genome assembly common carp genome ,scaffold LG42	6.314764697	6.598021171	5.86214712	2.985227289	3.478710739	2.998712827	3.003908755	3.12832948	1.485666734	0	1.924358135	1.686952504	2.014903021	1.904902125	1.008665699	1.353505122	2.601629865	0.693147181	0.693147181	0.693147181	1.087052396	3.19047635	3.277144733	3.390385813	4.023217272	3.791961626	4.018129243	0.693147181	1.05280218	0.693147181	emb|LN590674.1| Cyprinus carpio genome assembly common carp genome ,scaffold LG42
File_R_cluster_1_biclust_result_1_bclustnum_266_kamer_1_number_1	emb|LN590674.1| Cyprinus carpio genome assembly common carp genome ,scaffold LG42	6.176656979	6.461996162	6.065028621	2.376357723	2.200349689	2.522908672	2.277267285	1.887069649	1.890199594	0	1.184058831	1.083346355	0	0	0	0	0	0	0.693147181	0.693147181	1.226445394	0	0	0	2.343970769	2.144199961	2.0533093	2.173967323	2.366146574	1.615869187	emb|LN590674.1| Cyprinus carpio genome assembly common carp genome ,scaffold LG42
File_R_cluster_1_biclust_result_1_bclustnum_26704_kamer_1_number_1	emb|LN590674.1| Cyprinus carpio genome assembly common carp genome ,scaffold LG42	6.2563161	5.885392667	6.615206718	2.902404627	3.755025277	3.513299124	1.55408798	2.528077883	2.476807272	0	1.412963069	1.719305257	0.693147181	1.089561453	0	1.745668409	1.081143935	0.693147181	1.130872939	0	0.919565364	0	0	0	3.385257684	3.987558958	2.931535028	3.194837198	2.884979468	2.043723686	emb|LN590674.1| Cyprinus carpio genome assembly common carp genome ,scaffold LG42
File_R_cluster_1_biclust_result_1_bclustnum_268012_kamer_1_number_1	emb|LN590674.1| Cyprinus carpio genome assembly common carp genome ,scaffold LG42	5.986165532	6.359222596	6.089962821	3.091624102	3.975532873	3.9072014	2.960301968	2.771006221	2.313912693	0	2.287278543	1.728626183	0	0	0.693147181	0	1.516914646	0	1.227228287	1.08780072	0.693147181	0	0	0	3.32129522	3.703642443	4.141123181	2.276884648	2.570243014	1.981885216	emb|LN590674.1| Cyprinus carpio genome assembly common carp genome ,scaffold LG42
File_R_cluster_1_biclust_result_1_bclustnum_268162_kamer_1_number_1	emb|LN590674.1| Cyprinus carpio genome assembly common carp genome ,scaffold LG42	3.569780553	3.764865483	3.693254868	3.517672896	3.623260349	3.45769113	3.66831954	3.840374468	3.578746457	0	1.542746676	1.000172216	0	0	0	0	0	0	0.693147181	0.693147181	0	0	0	0	7.649745003	7.563563974	7.705375081	2.848663954	2.616483008	2.634848485	emb|LN590674.1| Cyprinus carpio genome assembly common carp genome ,scaffold LG42
File_R_cluster_1_biclust_result_1_bclustnum_269659_kamer_1_number_1	emb|LN590713.1| Cyprinus carpio genome assembly common carp genome ,scaffold LG20	5.772938444	6.155153167	5.761651932	3.537544806	3.603917793	2.830686625	2.312215571	2.003583192	2.120263136	0	1.670807668	0.693147181	0.693147181	0	0	0	1.018569303	0.693147181	0.693147181	0.885039458	1.023389336	0	0	0	3.785052898	3.669385679	4.226186821	2.593940411	2.674148649	2.433613355	emb|LN590713.1| Cyprinus carpio genome assembly common carp genome ,scaffold LG20
File_R_cluster_1_biclust_result_1_bclustnum_269847_kamer_1_number_1	emb|LN590674.1| Cyprinus carpio genome assembly common carp genome ,scaffold LG42	7.007446756	7.404346066	7.052115329	2.148939619	2.504905336	2.788560492	3.52278945	3.625955629	3.734779732	0	3.318583594	3.304774583	1.360976553	0	1.171636579	2.862200881	2.722531506	2.070782914	0.693147181	1.067840318	1.036091287	1.567177384	2.20414502	1.589235205	9.042658727	8.967960483	9.115780211	2.075646851	1.919592574	1.845826164	emb|LN590674.1| Cyprinus carpio genome assembly common carp genome ,scaffold LG42
File_R_cluster_1_biclust_result_1_bclustnum_27_kamer_1_number_1	emb|LN590698.1| Cyprinus carpio genome assembly common carp genome ,scaffold LG17	8.264543586	8.338516185	8.485533263	2.906004483	3.608493354	3.652013167	2.70306446	2.955378919	2.349240599	0	2.661196161	2.364788703	0	0	0.693147181	0.693147181	1.591088589	1.06582391	0.906070685	0.693147181	0.693147181	0	0	0	1.958621869	2.754431116	1.875240873	2.168627324	2.071951058	2.375946143	emb|LN590698.1| Cyprinus carpio genome assembly common carp genome ,scaffold LG17
File_R_cluster_1_biclust_result_1_bclustnum_270584_kamer_1_number_1	emb|LN590713.1| Cyprinus carpio genome assembly common carp genome ,scaffold LG20	6.734542907	6.638819066	6.343374155	3.583518938	2.863371624	2.974268567	2.033771879	2.641518584	1.776943587	0	1.518784274	1.057370067	0	0.693147181	0.693147181	0.693147181	1.559739136	0.693147181	0.693147181	0.693147181	0.933682613	0	0.693147181	0	2.157880657	2.611274949	2.975529566	3.202746443	2.848663954	2.572367926	emb|LN590713.1| Cyprinus carpio genome assembly common carp genome ,scaffold LG20
File_R_cluster_1_biclust_result_1_bclustnum_27249_kamer_1_number_1	emb|LN590674.1| Cyprinus carpio genome assembly common carp genome ,scaffold LG42	5.570719544	6.143599626	6.038925257	3.024533507	3.340519842	3.406377276	1.973359933	1.717651753	2.504202613	0	1.977364518	1.596364831	0	0	0	0.693147181	0	0.693147181	0.693147181	0.693147181	0.693147181	0	0	0	2.669212348	2.901135839	3.007354473	1.840343263	2.756325947	2.185612978	emb|LN590674.1| Cyprinus carpio genome assembly common carp genome ,scaffold LG42
File_R_cluster_1_biclust_result_1_bclustnum_272922_kamer_1_number_1	emb|LN590695.1| Cyprinus carpio genome assembly common carp genome ,scaffold LG23	6.538932563	6.592669121	6.76709108	2.778564581	2.227211551	2.731252272	2.067653586	1.789473525	2.140066163	0	1.89369011	1.814334394	1.043349724	0.693147181	0	0	1.495493998	0	1.232784726	0	0.880746452	0	0	1.098612289	1.967207457	2.448873518	1.703501861	2.21557408	2.623791396	2.305805901	emb|LN590695.1| Cyprinus carpio genome assembly common carp genome ,scaffold LG23
File_R_cluster_1_biclust_result_1_bclustnum_27316_kamer_1_number_1	emb|LN590674.1| Cyprinus carpio genome assembly common carp genome ,scaffold LG42	5.877379976	6.053962707	6.044464884	2.6481728	2.49226286	2.755620574	1.750697863	1.879727611	1.831367928	0	1.021054269	1.245410289	0	0	0	0.693147181	1.534475113	0	0.693147181	0.693147181	0.921540925	0	0	0	3.087007049	2.673714072	3.622143854	1.612509191	2.504905336	1.756667554	emb|LN590674.1| Cyprinus carpio genome assembly common carp genome ,scaffold LG42
File_R_cluster_1_biclust_result_1_bclustnum_2734_kamer_1_number_1	emb|LN590674.1| Cyprinus carpio genome assembly common carp genome ,scaffold LG42	6.433671337	6.444627159	6.200008034	3.402925887	3.029568323	2.979364042	2.048804483	1.32818579	2.049841501	0	2.164964207	1.88075277	0	0	0	1.079918646	1.038508365	0.693147181	0	1.098612289	0.693147181	0.693147181	0	0	3.731155591	3.668212353	3.935891864	2.319114723	1.915498069	2.154165128	emb|LN590674.1| Cyprinus carpio genome assembly common carp genome ,scaffold LG42
File_R_cluster_1_biclust_result_1_bclustnum_275370_kamer_1_number_1	emb|LN590674.1| Cyprinus carpio genome assembly common carp genome ,scaffold LG42	3.312493664	3.816962594	3.523049166	1.690877797	3.18580703	3.191845783	3.257504055	2.976314972	0.869039783	6.72106419	1.979543855	1.866293184	1.089043318	1.053761356	1.229947521	0.693147181	1.53200596	0.693147181	0	1.236232809	0.950193484	0.693147181	1.085189268	0	2.429605334	5.694267349	2.33708893	1.609437912	1.230672183	0.693147181	emb|LN590674.1| Cyprinus carpio genome assembly common carp genome ,scaffold LG42
File_R_cluster_1_biclust_result_1_bclustnum_27615_kamer_1_number_1	emb|LN590698.1| Cyprinus carpio genome assembly common carp genome ,scaffold LG17	0	0.693147181	0	0	0	0	0	0	0	7.524863393	0	0	0	0	0	0	0	0	0	0	0	0	0	0	0.693147181	0	0	0	0	0	emb|LN590698.1| Cyprinus carpio genome assembly common carp genome ,scaffold LG17
File_R_cluster_1_biclust_result_1_bclustnum_276255_kamer_1_number_1	emb|LN590700.1| Cyprinus carpio genome assembly common carp genome ,scaffold LG10	0.693147181	0.693147181	0.722133003	0	0	1.085189268	2.538976503	2.108135893	2.244477052	6.641069892	0	0.693147181	0	0	0	0	0	0	2.460007558	2.471154183	2.233006693	0	1.08462492	0	0.693147181	0.693147181	0.693147181	0	0	0	emb|LN590700.1| Cyprinus carpio genome assembly common carp genome ,scaffold LG10
File_R_cluster_1_biclust_result_1_bclustnum_27645_kamer_1_number_1	emb|LN590705.1| Cyprinus carpio genome assembly common carp genome ,scaffold LG11	5.522280582	5.745957154	6.021457721	1.537694834	0	1.756667554	0.909121091	0	1.360091546	0	0.693147181	0.693147181	0.693147181	0.693147181	0	0	1.347072648	0	0.693147181	0.693147181	0.693147181	0	0	0	2.645444034	2.89463488	2.928111674	1.360091546	1.587777	1.049821124	emb|LN590705.1| Cyprinus carpio genome assembly common carp genome ,scaffold LG11
File_R_cluster_1_biclust_result_1_bclustnum_278171_kamer_1_number_1	emb|LN590705.1| Cyprinus carpio genome assembly common carp genome ,scaffold LG11	6.595634328	6.825098407	7.104940817	1.406096988	1.14697379	1.441414449	0.891998039	0.860718824	1.129248181	0	1.593308531	1.306252278	0.693147181	0	1.051209661	1.386294361	1.495913048	0.693147181	0.693147181	0	0	0	0	0	1.067008096	1.974081026	1.158976484	0.693147181	1.086637543	0.693147181	emb|LN590705.1| Cyprinus carpio genome assembly common carp genome ,scaffold LG11
File_R_cluster_1_biclust_result_1_bclustnum_27825_kamer_1_number_1	emb|LN590674.1| Cyprinus carpio genome assembly common carp genome ,scaffold LG42	6.120789605	6.169361748	5.87409049	2.486147546	3.472708413	3.16993765	3.042386826	2.548741799	1.371256863	0	2.06250772	1.913404667	1.302211419	1.738270784	1.054649952	2.516655609	3.751854253	3.107041063	0	1.312760839	1.615390163	2.421851472	2.062634847	2.370243741	3.80964249	5.225504709	3.978984214	1.485666734	1.430095912	0.895173321	emb|LN590674.1| Cyprinus carpio genome assembly common carp genome ,scaffold LG42
File_R_cluster_1_biclust_result_1_bclustnum_27857_kamer_1_number_1	emb|LN591055.1| Cyprinus carpio genome assembly common carp genome ,scaffold 000001389	6.218400897	6.179679123	5.942962092	4.007333185	2.358492725	2.288739686	2.071598364	2.332143895	2.008430116	0	2.26436388	1.913239367	0	0.995427183	0	0	0.693147181	0	0	0	0	0	0	0	3.101217781	2.433613355	3.427108763	2.052568679	2.733022449	2.335374593	emb|LN591055.1| Cyprinus carpio genome assembly common carp genome ,scaffold 000001389
File_R_cluster_1_biclust_result_1_bclustnum_27907_kamer_1_number_1	emb|LN590698.1| Cyprinus carpio genome assembly common carp genome ,scaffold LG17	6.13593928	6.307830646	6.086199562	3.362057999	3.563882964	2.736469195	2.812236027	2.299353878	2.143979672	0	1.518981335	1.543686923	0	0	0	0	0	0.693147181	0.693147181	1.335001067	0.899762897	0.693147181	0	0	2.584246578	2.537918051	2.301251204	2.265047283	3.050646504	2.276440276	emb|LN590698.1| Cyprinus carpio genome assembly common carp genome ,scaffold LG17
File_R_cluster_1_biclust_result_1_bclustnum_279485_kamer_1_number_1	emb|LN590705.1| Cyprinus carpio genome assembly common carp genome ,scaffold LG11	6.129204882	6.480613419	6.347413728	0	0.693147181	0.693147181	0.85744902	0.693147181	0.693147181	0	1.357305721	0	0	0	0.693147181	1.285196968	1.342491365	0.693147181	0.693147181	0.693147181	0	0	0.693147181	1.076138296	3.657682861	2.556118169	3.466629254	0.693147181	0	0	emb|LN590705.1| Cyprinus carpio genome assembly common carp genome ,scaffold LG11
File_R_cluster_1_biclust_result_1_bclustnum_279939_kamer_1_number_1	emb|LN590674.1| Cyprinus carpio genome assembly common carp genome ,scaffold LG42	7.509296909	7.735533872	7.649787857	3.44112938	3.236012156	3.131189311	2.227415327	2.609201769	2.26436388	0	1.569130369	2.511305124	0	0	0	1.073294481	1.061706228	0	0.693147181	0.693147181	0.921680183	0	0	0	4.666349948	4.337694581	4.978862509	2.766319109	2.114319908	2.809029132	emb|LN590674.1| Cyprinus carpio genome assembly common carp genome ,scaffold LG42
File_R_cluster_1_biclust_result_1_bclustnum_280309_kamer_1_number_1	emb|LN590674.1| Cyprinus carpio genome assembly common carp genome ,scaffold LG42	5.973142723	5.779585438	6.221484402	2.743256457	2.708050201	2.762380546	2.023201823	1.340383922	1.91200909	0	1.229947521	1.252762968	0	0	0	0.693147181	0.693147181	0	0	0	0	0	0	0	2.762380546	3.270993779	3.178574528	2.309229967	2.843303444	2.787625107	emb|LN590674.1| Cyprinus carpio genome assembly common carp genome ,scaffold LG42
File_R_cluster_1_biclust_result_1_bclustnum_28041_kamer_1_number_1	emb|LN590674.1| Cyprinus carpio genome assembly common carp genome ,scaffold LG42	6.074761953	5.828242429	6.213367329	0.693147181	1.987294728	1.093907907	0	1.079653705	0	0	0.693147181	1.044546734	0	0.693147181	0	1.472726612	2.194510899	0.693147181	0	1.052519483	0.693147181	0	0	0	1.209589998	2.89984893	0	0.966439972	0.693147181	1.073034618	emb|LN590674.1| Cyprinus carpio genome assembly common carp genome ,scaffold LG42
File_R_cluster_1_biclust_result_1_bclustnum_28193_kamer_1_number_1	emb|LN590674.1| Cyprinus carpio genome assembly common carp genome ,scaffold LG42	5.780422477	6.249372744	6.051813837	3.122994682	3.633818545	3.407669724	1.915776367	2.02266482	2.245121221	0	1.911944063	2.137771769	0.693147181	0.693147181	0.693147181	1.061910268	1.089309148	1.079918646	0.693147181	0.887302607	1.073420968	0	0.693147181	0	2.702843336	3.11149104	3.617912314	2.117662958	2.136238849	2.627078729	emb|LN590674.1| Cyprinus carpio genome assembly common carp genome ,scaffold LG42
File_R_cluster_1_biclust_result_1_bclustnum_285850_kamer_1_number_1	emb|LN590698.1| Cyprinus carpio genome assembly common carp genome ,scaffold LG17	7.051924885	7.099441186	7.076586246	4.66029264	4.92703627	4.866364536	3.993743075	3.98053176	3.807000211	0	4.241981215	3.958501929	0	0	0	0	0	0	0.693147181	1.185624499	1.239692203	0	0	0	4.173921007	4.930653696	4.277927823	3.375103204	3.309768991	3.123566845	emb|LN590698.1| Cyprinus carpio genome assembly common carp genome ,scaffold LG17
File_R_cluster_1_biclust_result_1_bclustnum_28792_kamer_1_number_1	emb|LN591055.1| Cyprinus carpio genome assembly common carp genome ,scaffold 000001389	8.966259149	8.968818978	8.993094396	2.467039648	2.511905544	2.773369667	2.48386444	2.377228636	2.012601708	0	3.668357818	3.493092646	0.693147181	1.328400383	1.880707026	2.817687558	2.353443593	2.011723304	1.677096561	1.223022207	1.910543485	0	0	0.693147181	2.923161581	2.852150545	3.189961815	2.10819055	1.634130525	1.5712167	emb|LN591055.1| Cyprinus carpio genome assembly common carp genome ,scaffold 000001389
File_R_cluster_1_biclust_result_1_bclustnum_288258_kamer_1_number_1	emb|LN590698.1| Cyprinus carpio genome assembly common carp genome ,scaffold LG17	6.121869808	6.340454537	6.079871408	3.589578321	2.684344768	3.305592825	2.35696153	1.664641751	2.470917591	0	1.218860432	1.358894901	0	0	0	0	0.693147181	0	1.331806496	1.038267628	1.205323891	0	0	0	1.84076707	2.360343493	2.457929346	2.473736158	2.768794031	2.460417558	emb|LN590698.1| Cyprinus carpio genome assembly common carp genome ,scaffold LG17
File_R_cluster_1_biclust_result_1_bclustnum_288459_kamer_1_number_1	emb|LN590674.1| Cyprinus carpio genome assembly common carp genome ,scaffold LG42	6.492108008	6.52207221	6.578224296	3.06094869	2.738501809	2.967065274	1.660296412	1.03375016	2.036882362	0	1.342235362	1.854937691	0	0	0	0	1.098612289	0.693147181	1.076870983	0.693147181	1.087440112	0	0	0	2.425183184	2.932930909	2.454249828	2.713833446	2.500410836	3.393323128	emb|LN590674.1| Cyprinus carpio genome assembly common carp genome ,scaffold LG42
File_R_cluster_1_biclust_result_1_bclustnum_28852_kamer_1_number_1	emb|LN590674.1| Cyprinus carpio genome assembly common carp genome ,scaffold LG42	6.608254304	7.157899022	6.752854318	1.910818727	1.304948722	2.056867402	1.587777	0	0	0	0.980830503	0.693147181	0.693147181	0	0	1.074514249	0	0.693147181	0	0	0	0	0	0	1.133097448	1.467335032	1.318416939	1.086637543	0.693147181	1.086637543	emb|LN590674.1| Cyprinus carpio genome assembly common carp genome ,scaffold LG42
File_R_cluster_1_biclust_result_1_bclustnum_290131_kamer_1_number_1	emb|LN590674.1| Cyprinus carpio genome assembly common carp genome ,scaffold LG42	5.697304874	6.087867312	6.087120122	1.392604411	2.417270001	1.933170775	1.724121037	1.202705001	1.312187543	0	1.376632839	1.560911314	0	0	0.693147181	0	0.693147181	0.693147181	0.693147181	0	0	0	0	0	2.778110947	2.320151889	3.542610135	1.06582391	0.693147181	1.360091546	emb|LN590674.1| Cyprinus carpio genome assembly common carp genome ,scaffold LG42
File_R_cluster_1_biclust_result_1_bclustnum_29062_kamer_1_number_1	emb|LN591168.1| Cyprinus carpio genome assembly common carp genome ,scaffold 000028897	1.345472367	1.375822219	1.071583616	0	1.365241803	1.508184507	1.424613225	1.338285142	1.332450448	6.75715097	4.10301024	3.870419456	0	0	0	0	0	0	0.693147181	0.806475866	1.750937475	1.098612289	0.693147181	1.08462492	1.216395324	1.345472367	0.693147181	0	0	0	emb|LN591168.1| Cyprinus carpio genome assembly common carp genome ,scaffold 000028897
File_R_cluster_1_biclust_result_1_bclustnum_29143_kamer_1_number_1	emb|LN590713.1| Cyprinus carpio genome assembly common carp genome ,scaffold LG20	7.393503066	7.227059557	6.473722472	3.293519368	2.944438979	2.997291058	1.882006855	1.724040786	2.63188884	0	0.693147181	0	0	0	0	0	0	0	0	0.693147181	0.693147181	0	0	0	2.328902726	2.366146574	2.843850684	1.890199594	1.063520374	2.147879092	emb|LN590713.1| Cyprinus carpio genome assembly common carp genome ,scaffold LG20
File_R_cluster_1_biclust_result_1_bclustnum_291451_kamer_1_number_1	emb|LN590713.1| Cyprinus carpio genome assembly common carp genome ,scaffold LG20	5.809585892	6.11278576	5.830136085	3.406669051	2.992562254	2.957017432	1.998739763	1.890133134	1.951319776	0	2.570770841	2.09669681	0.693147181	0	0.693147181	0.693147181	0	0	0	1.001983907	0.907015853	0	0	0	3.759726938	2.777321256	3.867236914	2.539820881	2.2385062	2.710128041	emb|LN590713.1| Cyprinus carpio genome assembly common carp genome ,scaffold LG20
File_R_cluster_1_biclust_result_1_bclustnum_291679_kamer_1_number_1	emb|LN590705.1| Cyprinus carpio genome assembly common carp genome ,scaffold LG11	5.926413895	6.548256351	6.140464126	2.779775337	3.765365846	4.081223861	2.020017917	1.386294361	2.747437567	0	2.50604825	0.926494496	0.693147181	0.693147181	0	0	1.299283893	0.693147181	0	0.693147181	0.693147181	0	0	0	3.143820327	3.71451065	4.190625483	1.098612289	1.547562509	0.693147181	emb|LN590705.1| Cyprinus carpio genome assembly common carp genome ,scaffold LG11
File_R_cluster_1_biclust_result_1_bclustnum_29169_kamer_1_number_1	emb|LN590674.1| Cyprinus carpio genome assembly common carp genome ,scaffold LG42	6.763719768	7.001582542	6.737085575	0.879249083	0.998530409	1.343733877	1.330414248	0.693147181	1.093837575	0	0.90479693	0	1.017644431	0.693147181	0	1.578665254	1.838876806	1.06686359	0	0.693147181	0	2.044755631	1.386294361	1.603168299	1.024502778	1.606575821	0.693147181	0.877882489	0.896744952	0.693147181	emb|LN590674.1| Cyprinus carpio genome assembly common carp genome ,scaffold LG42
File_R_cluster_1_biclust_result_1_bclustnum_292784_kamer_1_number_1	emb|LN590674.1| Cyprinus carpio genome assembly common carp genome ,scaffold LG42	7.295680797	7.116312972	7.794497729	3.270507662	4.178324126	4.206604224	3.473319574	3.513838331	3.549470824	0	3.416886987	3.354392246	0.693147181	0.693147181	0.693147181	0.693147181	1.386294361	1.053761356	1.076870983	0.693147181	0.693147181	0	0.693147181	0	4.246110973	5.411588014	3.910740183	2.040221129	2.825833237	2.248363304	emb|LN590674.1| Cyprinus carpio genome assembly common carp genome ,scaffold LG42
File_R_cluster_1_biclust_result_1_bclustnum_292804_kamer_1_number_1	emb|LN590698.1| Cyprinus carpio genome assembly common carp genome ,scaffold LG17	0.693147181	0.693147181	0	0	0	0	0	0	0	7.153974527	0	0	0	0	0	0	0	0	0	0	0	0	0	0	0	0	0	0	0	0	emb|LN590698.1| Cyprinus carpio genome assembly common carp genome ,scaffold LG17
File_R_cluster_1_biclust_result_1_bclustnum_294130_kamer_1_number_1	emb|LN590674.1| Cyprinus carpio genome assembly common carp genome ,scaffold LG42	6.261909536	6.145555939	6.23636959	0.693147181	1.08780072	0	0.693147181	0.693147181	1.093696895	0	0.895794104	0.693147181	0	0	0.693147181	1.516348465	1.266947603	1.039771284	0	1.089309148	0.90078717	0	0	0.693147181	1.46953656	2.61698699	1.165750553	0.693147181	0.693147181	0.875468737	emb|LN590674.1| Cyprinus carpio genome assembly common carp genome ,scaffold LG42
File_R_cluster_1_biclust_result_1_bclustnum_294740_kamer_1_number_1	emb|LN591055.1| Cyprinus carpio genome assembly common carp genome ,scaffold 000001389	6.835057696	7.245055744	6.615454557	3.72321083	4.002777369	4.354821149	1.774453922	2.012939761	1.345013928	0	2.619969161	1.848917698	1.753397987	1.041452698	1.098612289	2.333356752	1.716047647	3.129869732	0.693147181	1.360222423	2.009002983	0.693147181	0	0.693147181	1.231530577	4.012400326	1.655422239	8.291576585	7.981815279	7.808274289	emb|LN591055.1| Cyprinus carpio genome assembly common carp genome ,scaffold 000001389
File_R_cluster_1_biclust_result_1_bclustnum_295898_kamer_1_number_1	emb|LN590705.1| Cyprinus carpio genome assembly common carp genome ,scaffold LG11	6.577041829	6.746251129	7.091026385	1.032550831	1.270221113	1.538485265	0.693147181	0	1.170585603	0	1.845826164	1.012843775	0	0	0	0	1.267688174	0.693147181	0.693147181	1.236302521	1.299283893	0	0	0.693147181	1.172039315	1.941988182	1.427117156	1.098612289	0.693147181	1.098612289	emb|LN590705.1| Cyprinus carpio genome assembly common carp genome ,scaffold LG11
File_R_cluster_1_biclust_result_1_bclustnum_296939_kamer_1_number_1	emb|LN590674.1| Cyprinus carpio genome assembly common carp genome ,scaffold LG42	6.284997594	6.038832272	6.263834358	0	0	0.890972924	0.693147181	0.693147181	0.693147181	0	0	0	0	0.693147181	0.693147181	1.08780072	1.935893002	1.688574363	0.693147181	0	0.693147181	0	0	0	1.316767418	2.494807474	1.363652457	0	0	0	emb|LN590674.1| Cyprinus carpio genome assembly common carp genome ,scaffold LG42
File_R_cluster_1_biclust_result_1_bclustnum_297_kamer_1_number_1	emb|LN590731.1| Cyprinus carpio genome assembly common carp genome ,scaffold 000000050	7.424791577	7.58747775	6.588431169	5.01232054	5.042908855	5.117035269	3.971800209	3.973056014	3.953548752	0	2.742986107	2.454696552	2.007029438	2.171814457	1.549619965	2.193852231	2.63188884	2.333356752	1.41624629	1.942092873	1.673120442	1.936340217	1.609437912	1.098612289	4.133565275	4.277592079	4.204494092	4.108733871	4.709530201	4.143558446	emb|LN590731.1| Cyprinus carpio genome assembly common carp genome ,scaffold 000000050
File_R_cluster_1_biclust_result_1_bclustnum_298_kamer_1_number_1	emb|LN590674.1| Cyprinus carpio genome assembly common carp genome ,scaffold LG42	6.801139531	6.883842637	7.003519901	4.235554731	3.14291876	3.599657454	1.945910149	1.770098216	3.165475048	0	3.619376631	3.540129995	0.693147181	1.088760586	1.386294361	1.609437912	2.353878787	1.734601644	1.098612289	1.098612289	0.693147181	0	0	0	3.644702881	3.671224519	4.193542629	1.098612289	0.875468737	1.33875454	emb|LN590674.1| Cyprinus carpio genome assembly common carp genome ,scaffold LG42
File_R_cluster_1_biclust_result_1_bclustnum_29852_kamer_1_number_1	emb|LN590705.1| Cyprinus carpio genome assembly common carp genome ,scaffold LG11	6.839187317	6.752318272	6.383780246	0.862830882	0.693147181	1.429277219	0.693147181	0.824916396	0.693147181	0	1.086637543	1.235814436	0	1.080431346	0.693147181	1.365241803	1.803594162	1.069626222	0	0	1.521934778	0	0	0	1.553868118	1.716958693	1.098612289	1.045123604	0.693147181	0.693147181	emb|LN590705.1| Cyprinus carpio genome assembly common carp genome ,scaffold LG11
File_R_cluster_1_biclust_result_1_bclustnum_30_kamer_1_number_1	emb|LN590674.1| Cyprinus carpio genome assembly common carp genome ,scaffold LG42	8.666850362	8.638289842	8.659544821	5.682235327	4.277579591	4.165031332	3.571384502	3.77306434	3.490108342	0	5.584732387	5.475747815	1.056052674	0.693147181	1.604017247	1.967650673	3.24625361	1.089800243	0.867764133	1.066574516	1.483396117	0.693147181	0	0	5.524926904	5.105230067	5.91047681	2.686772086	2.555799937	1.83468485	emb|LN590674.1| Cyprinus carpio genome assembly common carp genome ,scaffold LG42
File_R_cluster_1_biclust_result_1_bclustnum_301337_kamer_1_number_1	emb|LN590674.1| Cyprinus carpio genome assembly common carp genome ,scaffold LG42	6.064903188	6.701462699	6.283684433	3.12720342	4.02648141	3.997852017	1.853891973	2.266498743	2.449478071	0	2.042370317	1.735346072	1.09002889	0.693147181	0	0.693147181	1.721142065	1.081371178	1.576648156	0	1.087440112	0	0	0	3.601637141	3.44495267	4.302867079	2.071498832	2.826058397	2.21557408	emb|LN590674.1| Cyprinus carpio genome assembly common carp genome ,scaffold LG42
File_R_cluster_1_biclust_result_1_bclustnum_30203_kamer_2_number_2	emb|LN590705.1| Cyprinus carpio genome assembly common carp genome ,scaffold LG11	6.665200799	6.752906856	7.156129835	1.138220747	0	0.693147181	0	0	0	0	0.693147181	0	0.693147181	0	0	1.076870983	1.504077397	0.693147181	0	0.693147181	0	0	0	0	1.307513565	1.821612726	1.152680563	0	0	0	emb|LN590705.1| Cyprinus carpio genome assembly common carp genome ,scaffold LG11
File_R_cluster_1_biclust_result_1_bclustnum_302177_kamer_7_number_2	emb|LN590705.1| Cyprinus carpio genome assembly common carp genome ,scaffold LG11	5.888836406	5.785522203	6.230333799	1.026414286	0.693147181	0	0.693147181	0	0.693147181	0	1.35644064	1.224654457	0	1.378451184	0	1.098612289	1.721800059	0	0	0.907294386	0	0	0	0	1.863732784	2.916559188	2.077573548	0.693147181	0.693147181	0	emb|LN590705.1| Cyprinus carpio genome assembly common carp genome ,scaffold LG11
File_R_cluster_1_biclust_result_1_bclustnum_3022_kamer_1_number_1	emb|LN590674.1| Cyprinus carpio genome assembly common carp genome ,scaffold LG42	7.947597267	8.379993364	6.884706689	4.1101162	4.594342781	4.357694238	3.870238047	4.109865159	4.43538492	0	3.200243313	3.306604611	2.338595852	2.277662079	2.55111565	2.246496107	4.546746266	3.530030254	0.896088025	2.022057367	2.809402695	1.685075856	2.410802524	1.724040786	3.756538103	4.908344137	3.407331861	4.082219685	3.56366481	4.252881323	emb|LN590674.1| Cyprinus carpio genome assembly common carp genome ,scaffold LG42
File_R_cluster_1_biclust_result_1_bclustnum_3038_kamer_1_number_1	emb|LN590713.1| Cyprinus carpio genome assembly common carp genome ,scaffold LG20	7.687382862	7.886562489	7.639820242	4.204253717	4.722295227	4.932039317	4.314935525	4.486816738	3.924299342	0	2.911393685	3.281020232	3.330928697	3.295836866	3.330928697	0	2.079441542	0	1.696693926	1.329567913	1.913890078	1.087052396	1.609437912	0.693147181	5.490638758	5.535249418	5.766250103	3.339531176	3.393323128	2.758705292	emb|LN590713.1| Cyprinus carpio genome assembly common carp genome ,scaffold LG20
File_R_cluster_1_biclust_result_1_bclustnum_30509_kamer_1_number_1	emb|LN590674.1| Cyprinus carpio genome assembly common carp genome ,scaffold LG42	8.678917405	8.665273484	8.87502147	1.242357591	1.866212739	2.312678978	0.901692697	1.754855138	1.591892895	0	2.831506005	2.95732403	1.92402673	1.098612289	1.371025889	3.220019171	3.077796014	2.354172294	1.651997277	1.568011569	1.760987498	0	0	0	5.320391921	5.522096716	5.512375773	1.208312375	0.871837151	0.969899743	emb|LN590674.1| Cyprinus carpio genome assembly common carp genome ,scaffold LG42
File_R_cluster_1_biclust_result_1_bclustnum_30581_kamer_1_number_1	emb|LN590674.1| Cyprinus carpio genome assembly common carp genome ,scaffold LG42	7.200947145	7.372627013	7.236425732	4.768750552	4.506256622	4.287592321	2.79179681	3.20008029	2.76997907	0	1.957273908	2.468607877	0	0	0	0	0	0	1.406579715	1.430390191	2.147628088	0	0	0	4.331911593	4.024551371	4.371146409	3.424454819	3.583518938	2.846297954	emb|LN590674.1| Cyprinus carpio genome assembly common carp genome ,scaffold LG42
File_R_cluster_1_biclust_result_1_bclustnum_30905_kamer_1_number_1	emb|LN590674.1| Cyprinus carpio genome assembly common carp genome ,scaffold LG42	7.359664945	7.402658816	7.609926619	1.476891178	1.877525766	2.158335898	1.195460679	0.693147181	1.288838631	0	3.311739378	2.293589756	2.079441542	1.542543552	1.74216298	3.021166075	3.104322069	1.766181798	2.499088937	1.444282569	3.303661727	0	0	0	1.897865707	3.226605871	1.835562616	1.035555336	1.615390163	0.693147181	emb|LN590674.1| Cyprinus carpio genome assembly common carp genome ,scaffold LG42
File_R_cluster_1_biclust_result_1_bclustnum_309155_kamer_1_number_1	emb|LN591408.1| Cyprinus carpio genome assembly common carp genome ,scaffold 000001104	5.056697932	5.104325981	5.06470041	4.770811735	4.931635376	5.06134742	3.969872958	3.830661095	4.071466511	0	2.367850225	2.678559597	0	0	0	0	0	0	1.048350042	1.695910978	1.693319396	0	0	0	4.307743455	6.067042688	4.430816799	4.476326077	4.567583577	4.445854356	emb|LN591408.1| Cyprinus carpio genome assembly common carp genome ,scaffold 000001104
File_R_cluster_1_biclust_result_1_bclustnum_30953_kamer_1_number_1	emb|LN598497.1| Cyprinus carpio genome assembly common carp genome ,scaffold 000002514	6.056226481	6.11146734	5.698853681	3.301377046	3.519415878	2.855124474	2.347797436	2.096916708	2.699937381	0	1.639365579	1.883274578	0	0	0	0	0	0	0.693147181	0.930473677	0.693147181	0	0	0	3.228330984	3.158063685	3.447603754	2.302585093	2.737712558	2.512302921	emb|LN598497.1| Cyprinus carpio genome assembly common carp genome ,scaffold 000002514
File_R_cluster_1_biclust_result_1_bclustnum_310054_kamer_1_number_1	emb|LN590674.1| Cyprinus carpio genome assembly common carp genome ,scaffold LG42	5.916864916	6.143623244	6.137593136	3.298725283	3.851807925	3.452463842	3.32323584	3.380674895	3.150331424	0	2.340903476	1.847470076	1.368275492	1.773067525	1.558144618	2.764222573	1.587777	1.074514249	0.817848452	0.693147181	0.693147181	1.925290445	2.302585093	2.269914163	6.750273056	6.623553809	6.811176094	2.265985422	2.112104744	2.302585093	emb|LN590674.1| Cyprinus carpio genome assembly common carp genome ,scaffold LG42
File_R_cluster_1_biclust_result_1_bclustnum_310282_kamer_1_number_1	emb|LN590705.1| Cyprinus carpio genome assembly common carp genome ,scaffold LG11	6.615548318	6.788521191	7.094326128	1.16315081	1.049096361	1.335001067	0	0.693147181	0.693147181	0	0.693147181	0.869496774	0	0	0.693147181	0.693147181	1.54637883	1.331806496	0	0	0.693147181	0.693147181	0	0	1.002336309	2.37556972	0.693147181	1.075353897	0.693147181	0.693147181	emb|LN590705.1| Cyprinus carpio genome assembly common carp genome ,scaffold LG11
File_R_cluster_1_biclust_result_1_bclustnum_310416_kamer_1_number_1	emb|LN590705.1| Cyprinus carpio genome assembly common carp genome ,scaffold LG11	6.011164228	5.816482987	6.172424761	1.568615918	0.693147181	0.89451536	0.693147181	0	0	0	0	0	1.056052674	0	0.693147181	1.098612289	1.673975809	1.053761356	0.693147181	0	0	0	0	0	1.167606493	2.873005161	0.837186917	1.086637543	0.693147181	1.098612289	emb|LN590705.1| Cyprinus carpio genome assembly common carp genome ,scaffold LG11
File_R_cluster_1_biclust_result_1_bclustnum_3110_kamer_1_number_1	emb|LN590674.1| Cyprinus carpio genome assembly common carp genome ,scaffold LG42	6.939534914	6.762916773	6.883296589	3.361191027	3.055349329	3.104151606	2.021775352	2.1690537	1.862311125	0	1.282615764	0.693147181	0	0	0	0	0	0	0.930473677	0.693147181	0.693147181	0	0	0	2.412255309	1.85629799	2.418348312	1.363987401	2.423137623	2.855032391	emb|LN590674.1| Cyprinus carpio genome assembly common carp genome ,scaffold LG42
File_R_cluster_1_biclust_result_1_bclustnum_311495_kamer_1_number_1	emb|LN590705.1| Cyprinus carpio genome assembly common carp genome ,scaffold LG11	6.010894556	6.34136409	6.161740935	1.900563051	1.882006855	1.806419813	0	0	1.098612289	0	1.206500607	0.693147181	0	0	0.693147181	0	0	0.693147181	0.693147181	0	1.009267282	0	0	0	2.136335684	2.644464115	2.693599626	0	0.693147181	1.587777	emb|LN590705.1| Cyprinus carpio genome assembly common carp genome ,scaffold LG11
File_R_cluster_1_biclust_result_1_bclustnum_312449_kamer_1_number_1	emb|LN590713.1| Cyprinus carpio genome assembly common carp genome ,scaffold LG20	6.765576318	6.617933586	6.37909998	3.094771854	2.915920373	3.356077972	2.143979672	1.72506752	1.773325605	0	1.270221113	1.732761128	0.693147181	0.693147181	0.693147181	1.538401526	1.665718052	0.693147181	0.693147181	0.693147181	1.127941291	0	0	0.693147181	2.089010612	2.281823046	1.985914895	2.475453779	2.97942503	2.842656849	emb|LN590713.1| Cyprinus carpio genome assembly common carp genome ,scaffold LG20
File_R_cluster_1_biclust_result_1_bclustnum_313577_kamer_1_number_1	emb|LN590674.1| Cyprinus carpio genome assembly common carp genome ,scaffold LG42	7.150497515	7.074912435	7.325419014	2.613900681	3.771928408	3.518227541	2.397895273	2.881476759	1.386294361	0	1.732039542	2.179352485	0.693147181	0.693147181	0	1.052519483	1.894174652	1.371025889	0	0.693147181	0.693147181	0.693147181	0	0	4.33605861	4.915738362	4.020681876	1.044008257	0.693147181	0.693147181	emb|LN590674.1| Cyprinus carpio genome assembly common carp genome ,scaffold LG42
File_R_cluster_1_biclust_result_1_bclustnum_31546_kamer_1_number_1	emb|LN590674.1| Cyprinus carpio genome assembly common carp genome ,scaffold LG42	6.641817738	6.647995719	6.806902367	1.129248181	1.563670376	0.693147181	1.087052396	0.693147181	0.693147181	0	1.538562556	1.226093331	0	0.693147181	0	1.521469714	1.031360757	0.693147181	0	0	0.693147181	0	0.693147181	0	1.150572028	2.476092923	2.384649755	0.693147181	1.722766598	0.693147181	emb|LN590674.1| Cyprinus carpio genome assembly common carp genome ,scaffold LG42
File_R_cluster_1_biclust_result_1_bclustnum_315962_kamer_1_number_1	emb|LN590674.1| Cyprinus carpio genome assembly common carp genome ,scaffold LG42	6.158998132	6.349165215	6.073327904	1.409109603	1.587777	1.602270286	1.547562509	1.32818579	0.693147181	0	1.098612289	0.693147181	0	0	0.693147181	0	0	0.693147181	0	0	1.351203309	0	0	0	0.693147181	0.881856625	1.045967204	1.098612289	0	0	emb|LN590674.1| Cyprinus carpio genome assembly common carp genome ,scaffold LG42
File_R_cluster_1_biclust_result_1_bclustnum_321793_kamer_1_number_1	emb|LN590674.1| Cyprinus carpio genome assembly common carp genome ,scaffold LG42	6.910282084	7.132505539	6.749691118	2.888230578	3.019175325	2.888948523	1.548653403	2.509599262	2.964365438	0	1.897120485	1.831555337	0	0	0	2.009761827	2.36348356	1.027517209	1.458615023	1.054935529	1.088612457	0	0	0.693147181	4.607730905	3.856943605	4.213266209	1.834138651	3.114230609	1.894519106	emb|LN590674.1| Cyprinus carpio genome assembly common carp genome ,scaffold LG42
File_R_cluster_1_biclust_result_1_bclustnum_32376_kamer_1_number_1	emb|LN590674.1| Cyprinus carpio genome assembly common carp genome ,scaffold LG42	5.658589832	6.076111255	6.070975575	1.774518358	1.911944063	2.043548785	0	0.693147181	0.693147181	0	0.693147181	1.075353897	0	0	0	0	0	0	0.693147181	0.693147181	0.693147181	0	0	0	2.753170146	2.828679553	3.449174517	1.056052674	1.098612289	1.386294361	emb|LN590674.1| Cyprinus carpio genome assembly common carp genome ,scaffold LG42
File_R_cluster_1_biclust_result_1_bclustnum_32410_kamer_1_number_1	emb|LN590674.1| Cyprinus carpio genome assembly common carp genome ,scaffold LG42	6.450258709	6.723451359	6.659591311	0.995959216	1.386294361	0.959258263	0.693147181	0.693147181	0.693147181	0	1.839387053	0.932376657	0	0	1.039771284	0.693147181	0.693147181	0	0	0	0.693147181	0	0	0.693147181	2.755677785	1.752375676	2.602689685	1.098612289	0.693147181	0.693147181	emb|LN590674.1| Cyprinus carpio genome assembly common carp genome ,scaffold LG42
File_R_cluster_1_biclust_result_1_bclustnum_32472_kamer_1_number_1	emb|LN591305.1| Cyprinus carpio genome assembly common carp genome ,scaffold 000001301	7.202102589	7.31599653	7.737938952	5.248091923	5.241672938	5.251817827	4.057941609	3.919530752	3.338396017	0	3.484579124	3.385125586	0	0	0	0	0	0	1.749199855	1.711313764	1.362196322	0	0	0	4.55555338	5.106557408	4.595851905	3.435389447	3.461197495	4.097029288	emb|LN591305.1| Cyprinus carpio genome assembly common carp genome ,scaffold 000001301
File_R_cluster_1_biclust_result_1_bclustnum_327092_kamer_1_number_1	emb|LN590698.1| Cyprinus carpio genome assembly common carp genome ,scaffold LG17	0	0.693147181	0	0	0	0	0	0	0	6.352096153	0	0	0	0	0	0	0	0	0	0	0	0	0	0	0	0	0	0	0	0	emb|LN590698.1| Cyprinus carpio genome assembly common carp genome ,scaffold LG17
File_R_cluster_1_biclust_result_1_bclustnum_327153_kamer_1_number_1	emb|LN591030.1| Cyprinus carpio genome assembly common carp genome ,scaffold 000001187	1.838278803	1.560247668	1.5518088	1.366091654	2.367123927	1.899117988	1.5518088	0	1.529394205	6.970157144	0	0.693147181	0	0	0	0	0	0	0	0	0	0.693147181	1.791759469	1.098612289	0.693147181	1.484733731	0.693147181	5.596980179	5.55249436	5.591796354	emb|LN591030.1| Cyprinus carpio genome assembly common carp genome ,scaffold 000001187
File_R_cluster_1_biclust_result_1_bclustnum_327288_kamer_1_number_1	emb|LN590705.1| Cyprinus carpio genome assembly common carp genome ,scaffold LG11	5.968804742	6.289246073	6.163182164	1.064710737	1.71041383	1.990962725	0	1.005520646	0	0	0	0.693147181	0	0	0	0.693147181	1.090244039	0	0	0.693147181	0	0	0	0	1.817401225	2.320603777	2.544291287	0.693147181	0.693147181	1.086637543	emb|LN590705.1| Cyprinus carpio genome assembly common carp genome ,scaffold LG11
File_R_cluster_1_biclust_result_1_bclustnum_327542_kamer_1_number_1	emb|LN590713.1| Cyprinus carpio genome assembly common carp genome ,scaffold LG20	6.519222506	6.748210745	6.679090262	3.672338402	3.558702429	2.73633959	1.94219325	2.223032015	2.323063962	0	1.152680563	1.450374183	0.693147181	0	0	0	1.098612289	0	0.924949139	0.8766264	0.693147181	0	0	0	3.037262817	2.284473056	3.382028154	2.828011603	2.464584888	2.272561873	emb|LN590713.1| Cyprinus carpio genome assembly common carp genome ,scaffold LG20
File_R_cluster_1_biclust_result_1_bclustnum_328306_kamer_1_number_1	emb|LN590674.1| Cyprinus carpio genome assembly common carp genome ,scaffold LG42	6.79781987	7.039625292	6.776306288	3.1024993	3.133653392	2.966246819	1.28318409	2.482211354	2.321581513	0	1.445133861	1.894413827	1.319850025	0	0	1.76766143	2.203055323	0	0	0	0.693147181	0	0	0	2.903249593	2.454026391	2.286236175	2.161231184	3.061187562	2.132084987	emb|LN590674.1| Cyprinus carpio genome assembly common carp genome ,scaffold LG42
File_R_cluster_1_biclust_result_1_bclustnum_33_kamer_1_number_1	emb|LN591305.1| Cyprinus carpio genome assembly common carp genome ,scaffold 000001301	3.631586619	3.651052969	3.520549556	10.13561067	10.07685666	10.08015985	1.075353897	0.693147181	1.76766143	0	2.808854352	3.243420134	1.707498851	1.732761128	1.361804415	1.057370067	1.839615864	2.174751721	0.913005341	1.252762968	1.963077655	0	0	0	0.897360684	2.169919611	1.553347869	1.791759469	1.943743518	1.562918468	emb|LN591305.1| Cyprinus carpio genome assembly common carp genome ,scaffold 000001301
File_R_cluster_1_biclust_result_1_bclustnum_331913_kamer_1_number_1	emb|LN590674.1| Cyprinus carpio genome assembly common carp genome ,scaffold LG42	5.905770484	6.196647773	5.835030011	1.791759469	1.360091546	2.274057009	1.056052674	0	0.693147181	0	1.698386079	0.693147181	0	0.693147181	0	0.693147181	0.693147181	0	0	0.693147181	0	0.693147181	0	0	2.352565025	1.822531128	3.376733909	0.693147181	1.386294361	0	emb|LN590674.1| Cyprinus carpio genome assembly common carp genome ,scaffold LG42
File_R_cluster_1_biclust_result_1_bclustnum_33275_kamer_1_number_1	emb|LN590674.1| Cyprinus carpio genome assembly common carp genome ,scaffold LG42	6.606263625	6.694508839	7.113842189	1.280933845	1.386294361	1.386294361	0.929534643	0	0	0	1.494507305	0	0	0	0	0	1.00680397	0	0.693147181	0.881405248	0	1.098612289	0.693147181	0	0.693147181	1.989829969	2.03190041	0.693147181	0.693147181	0.693147181	emb|LN590674.1| Cyprinus carpio genome assembly common carp genome ,scaffold LG42
File_R_cluster_1_biclust_result_1_bclustnum_33341_kamer_1_number_1	emb|LN590674.1| Cyprinus carpio genome assembly common carp genome ,scaffold LG42	6.602809035	6.842857227	6.762339836	3.485461934	3.244372017	3.015534901	2.159003365	2.35375338	2.534688386	0	2.99947526	3.098965528	0.693147181	0.693147181	0.693147181	0	1.558144618	1.090244039	0.693147181	1.432669707	0.693147181	0	1.044546734	0.693147181	3.652604398	3.637257158	4.170147526	3.000560598	2.090596592	1.874719456	emb|LN590674.1| Cyprinus carpio genome assembly common carp genome ,scaffold LG42
File_R_cluster_1_biclust_result_1_bclustnum_333739_kamer_1_number_1	emb|LN590674.1| Cyprinus carpio genome assembly common carp genome ,scaffold LG42	6.758158382	7.012223397	6.764517503	0.693147181	2.121359336	2.010325895	0.693147181	0	0.893816058	0	1.19847874	1.231002197	1.552279028	1.079381898	0.693147181	1.315066852	2.186051277	0	0.693147181	0.693147181	0.693147181	0.693147181	1.069626222	1.069626222	1.015433558	1.592863309	1.555980172	0.693147181	0.869496774	1.365532824	emb|LN590674.1| Cyprinus carpio genome assembly common carp genome ,scaffold LG42
File_R_cluster_1_biclust_result_1_bclustnum_33388_kamer_1_number_1	emb|LN590881.1| Cyprinus carpio genome assembly common carp genome ,scaffold 000000633	0	0	0	0	0	0	0	0	0	7.158467304	0	0	0	0	0	0	0	0	0	0	0	0	0	0	0	0	0	0	0	0	emb|LN590881.1| Cyprinus carpio genome assembly common carp genome ,scaffold 000000633
File_R_cluster_1_biclust_result_1_bclustnum_334067_kamer_4_number_2	emb|LN590705.1| Cyprinus carpio genome assembly common carp genome ,scaffold LG11	7.291036126	7.325339981	7.552326522	2.63905733	4.252009061	4.562383763	3.463921758	2.914587292	4.232635859	0	3.629161296	3.642531805	0	1.596449933	1.088140989	2.57883709	2.45673863	1.590509903	1.764509882	0.904456989	2.003067928	0	0	0	3.555348061	3.578676678	4.019902945	0.693147181	1.386294361	0.693147181	emb|LN590705.1| Cyprinus carpio genome assembly common carp genome ,scaffold LG11
File_R_cluster_1_biclust_result_1_bclustnum_338009_kamer_1_number_1	emb|LN590712.1| Cyprinus carpio genome assembly common carp genome ,scaffold LG2	3.496025627	3.649033546	3.771847878	1.662825113	4.828889571	4.890078415	3.596854622	3.420679696	3.48263911	0	1.876316587	2.711962538	0	0	0	0.693147181	1.573506025	1.355523249	0.693147181	0	1.386294361	0	0.693147181	0	3.259023032	6.476212074	3.683447226	0.693147181	0	0.693147181	emb|LN590712.1| Cyprinus carpio genome assembly common carp genome ,scaffold LG2
File_R_cluster_1_biclust_result_1_bclustnum_338102_kamer_1_number_1	emb|LN590674.1| Cyprinus carpio genome assembly common carp genome ,scaffold LG42	7.340368519	7.494458023	7.057923755	4.13331845	3.134154188	3.215176993	3.855046222	3.741690097	3.354483061	0	3.728100167	3.62700405	1.098612289	0.693147181	1.098612289	2.280923158	2.291411905	1.779337637	1.075353897	0	1.773648111	2.974069317	3.166078242	2.239949826	9.059383752	9.04655358	9.128820073	1.44601269	1.863483053	1.978345531	emb|LN590674.1| Cyprinus carpio genome assembly common carp genome ,scaffold LG42
File_R_cluster_1_biclust_result_1_bclustnum_33889_kamer_1_number_1	emb|LN590705.1| Cyprinus carpio genome assembly common carp genome ,scaffold LG11	5.973992801	5.705520963	6.032181736	1.910078657	2.17277363	2.540120582	0.997000294	1.084012901	1.848113022	0	1.600703882	2.050028179	0	0	0.693147181	1.558144618	2.175979377	1.504077397	1.527372828	0.693147181	0.693147181	0	0	1.077558879	2.21002453	3.599889758	2.315543766	0	0.693147181	1.382665284	emb|LN590705.1| Cyprinus carpio genome assembly common carp genome ,scaffold LG11
File_R_cluster_1_biclust_result_1_bclustnum_339207_kamer_1_number_1	emb|LN594639.1| Cyprinus carpio genome assembly common carp genome ,scaffold 000002034	6.080621745	6.232636604	6.03531874	1.372306992	1.768663124	1.892106941	1.098612289	0.693147181	0.693147181	0	1.011600912	0.693147181	0	0	0	0	0.693147181	0.693147181	0.693147181	0.693147181	0.693147181	0.693147181	0	0	1.570326953	2.418846972	0.88239056	1.045123604	1.351203309	1.075353897	emb|LN594639.1| Cyprinus carpio genome assembly common carp genome ,scaffold 000002034
File_R_cluster_1_biclust_result_1_bclustnum_340425_kamer_1_number_1	emb|LN590674.1| Cyprinus carpio genome assembly common carp genome ,scaffold LG42	4.024159909	4.057853454	3.990525451	3.523415014	4.631159518	4.384938641	3.679669674	3.780393802	3.406738667	0	1.664556581	0	0	0.693147181	0	0	0	0	1.371480171	1.481604541	1.410986974	0	0	0	6.500188464	6.484661189	6.56070105	2.621038824	2.58273638	3.51402892	emb|LN590674.1| Cyprinus carpio genome assembly common carp genome ,scaffold LG42
File_R_cluster_1_biclust_result_1_bclustnum_340873_kamer_1_number_1	emb|LN590674.1| Cyprinus carpio genome assembly common carp genome ,scaffold LG42	6.386013625	6.219406567	6.363284967	3.197018689	2.794906566	2.957157752	1.563224326	2.428759489	2.439630305	0	1.834932298	1.318673762	0	0	0.693147181	1.276292536	1.644706596	1.35644064	1.083796407	0.693147181	1.172398542	0	0	0	2.359067501	2.840340824	2.37427672	2.035381237	2.209165225	2.200637635	emb|LN590674.1| Cyprinus carpio genome assembly common carp genome ,scaffold LG42
File_R_cluster_1_biclust_result_1_bclustnum_341842_kamer_1_number_1	emb|LN591055.1| Cyprinus carpio genome assembly common carp genome ,scaffold 000001389	5.836233701	6.090583374	6.137199917	2.643625451	2.415226042	2.162438727	1.881615408	1.463373451	0	0	2.031219841	0.832343746	0	0	0	1.043043199	0.693147181	0	0	0	0	0	0	0	2.766966698	3.072813678	3.358860351	1.595048885	0.864294032	1.167307783	emb|LN591055.1| Cyprinus carpio genome assembly common carp genome ,scaffold 000001389
File_R_cluster_1_biclust_result_1_bclustnum_343144_kamer_1_number_1	emb|LN590674.1| Cyprinus carpio genome assembly common carp genome ,scaffold LG42	6.344958938	6.58800308	6.296582478	3.301115502	2.857291708	2.81626464	1.96811046	2.117975721	1.720211551	0	1.88923246	2.326580877	0	0.693147181	0.693147181	0	1.317300597	1.054649952	1.098612289	0	1.266493979	0.693147181	0	1.098612289	3.547975235	3.767822326	3.423796748	1.921049379	1.962105437	2.140066163	emb|LN590674.1| Cyprinus carpio genome assembly common carp genome ,scaffold LG42
File_R_cluster_1_biclust_result_1_bclustnum_349207_kamer_1_number_1	emb|LN590717.1| Cyprinus carpio genome assembly common carp genome ,scaffold LG12	4.423954018	4.438968011	4.387407134	1.850947766	2.14955978	2.175832955	1.637053079	1.570216719	0.903444572	2.884180409	2.418464095	3.398229649	3.431758917	3.29912405	3.57465757	5.407803859	6.384916114	10.21172932	1.21924164	1.326191322	6.715304595	7.177851116	6.981275221	7.155349462	2.352388077	5.035392945	2.287579064	0	1.630118586	0.693147181	emb|LN590717.1| Cyprinus carpio genome assembly common carp genome ,scaffold LG12
File_R_cluster_1_biclust_result_1_bclustnum_34965_kamer_1_number_1	emb|LN590705.1| Cyprinus carpio genome assembly common carp genome ,scaffold LG11	6.283714297	6.548340872	6.29216896	3.081391487	1.38249967	1.148966309	0.693147181	1.254772377	0.693147181	0	1.758344006	1.648116171	0	0	0.693147181	1.098612289	0	0	0	0	0	0	0.693147181	0	2.056288057	2.065256407	2.403000401	1.086637543	0.867218128	0	emb|LN590705.1| Cyprinus carpio genome assembly common carp genome ,scaffold LG11
File_R_cluster_1_biclust_result_1_bclustnum_350113_kamer_1_number_1	emb|LN590674.1| Cyprinus carpio genome assembly common carp genome ,scaffold LG42	6.30179446	6.459630551	6.205086915	3.13874978	3.258096538	2.702843336	1.962469427	2.010449117	2.042842389	0	1.688711093	1.465361978	0	0.693147181	0	0	0.693147181	0	0.693147181	0	0	0	0	0	3.391988443	2.921816591	3.917756537	2.787064688	2.983153491	2.562546473	emb|LN590674.1| Cyprinus carpio genome assembly common carp genome ,scaffold LG42
File_R_cluster_1_biclust_result_1_bclustnum_350738_kamer_1_number_1	emb|LN590713.1| Cyprinus carpio genome assembly common carp genome ,scaffold LG20	6.701801877	6.801409834	7.163427974	2.539347485	2.52687199	3.254242969	1.447916133	1.762771687	1.471815879	0	1.280933845	1.943866634	0	0	0	0.693147181	0.693147181	0	0.693147181	1.428258903	0.91289698	0	0	0	1.491298313	1.845074302	2.162822901	2.305912551	1.816452082	2.51043631	emb|LN590713.1| Cyprinus carpio genome assembly common carp genome ,scaffold LG20
File_R_cluster_1_biclust_result_1_bclustnum_35084_kamer_1_number_1	emb|LN590674.1| Cyprinus carpio genome assembly common carp genome ,scaffold LG42	6.32244315	6.558936537	6.255275841	2.955909779	2.846820347	2.708963118	1.775648719	2.062169485	1.344331091	0	2.233103173	2.106470447	1.32175584	0	0.693147181	1.051209661	0	0	0.693147181	1.382768151	0.908036761	0.693147181	0	0.693147181	3.083541665	3.601991706	2.835628073	0	1.462113547	0.693147181	emb|LN590674.1| Cyprinus carpio genome assembly common carp genome ,scaffold LG42
File_R_cluster_1_biclust_result_1_bclustnum_351602_kamer_1_number_1	emb|LN590705.1| Cyprinus carpio genome assembly common carp genome ,scaffold LG11	6.726459995	6.644510827	6.880814616	1.857142946	2.072662365	2.077751364	2.33581095	1.684895973	1.213386357	0	1.435727176	1.707201444	0	0	0	1.28692144	1.329853631	1.089309148	0.693147181	0.899482258	1.553868118	0	0	0.693147181	2.752111743	2.834007147	2.836390644	0.693147181	1.059611551	1.055363741	emb|LN590705.1| Cyprinus carpio genome assembly common carp genome ,scaffold LG11
File_R_cluster_1_biclust_result_1_bclustnum_35319_kamer_1_number_1	emb|LN590674.1| Cyprinus carpio genome assembly common carp genome ,scaffold LG42	5.736791628	6.062023192	5.791362856	2.942305125	3.527950437	3.529534893	2.416154821	2.058963286	1.771281214	0	2.479257389	2.389258996	0	0	0.693147181	0.693147181	1.520606699	0	0	0	0	0	0	0	3.247645967	4.054835941	3.881563798	1.884978069	2.120263136	2.406945108	emb|LN590674.1| Cyprinus carpio genome assembly common carp genome ,scaffold LG42
File_R_cluster_1_biclust_result_1_bclustnum_353222_kamer_1_number_1	emb|LN590713.1| Cyprinus carpio genome assembly common carp genome ,scaffold LG20	6.309349025	6.313466521	6.078907498	3.290291891	2.861772218	2.969634674	1.895626871	2.161778155	1.55995771	0	1.609437912	1.237724745	0	0	0	0	0	0	0.693147181	0	0	0	0	0	3.030206161	2.946011426	2.904367799	1.623622829	2.333446929	2.079441542	emb|LN590713.1| Cyprinus carpio genome assembly common carp genome ,scaffold LG20
File_R_cluster_1_biclust_result_1_bclustnum_354989_kamer_1_number_1	emb|LN590713.1| Cyprinus carpio genome assembly common carp genome ,scaffold LG20	6.19670275	6.521989852	6.299337039	2.796750706	3.042477491	3.765551102	1.681758574	2.510615006	2.379001541	0	1.516695234	0.931557598	0	0	0.693147181	0.693147181	1.684339427	0.693147181	0.693147181	0.693147181	0.693147181	0	0	0.693147181	4.059471849	2.900492591	3.784830338	2.216093217	2.91596911	2.702152846	emb|LN590713.1| Cyprinus carpio genome assembly common carp genome ,scaffold LG20
File_R_cluster_1_biclust_result_1_bclustnum_356069_kamer_1_number_1	emb|LN590705.1| Cyprinus carpio genome assembly common carp genome ,scaffold LG11	6.171193162	5.861802801	6.591418555	1.098612289	3.11858245	2.81026377	2.197224577	1.945910149	1.386294361	0	1.098612289	1.893542594	0.693147181	0.693147181	0	1.098612289	1.316335845	0.693147181	0.693147181	0	0	0	0	0	2.48490665	3.836374463	2.386138247	0	0.693147181	0	emb|LN590705.1| Cyprinus carpio genome assembly common carp genome ,scaffold LG11
File_R_cluster_1_biclust_result_1_bclustnum_356717_kamer_1_number_1	emb|LN590705.1| Cyprinus carpio genome assembly common carp genome ,scaffold LG11	9.988265187	9.839519535	10.29785464	6.149179581	6.064347841	5.869937951	5.534155993	5.48379228	5.031920482	0	6.929585262	6.791425936	1.098612289	1.590509903	1.378690525	1.92402673	4.510281317	2.538976503	2.199015195	2.641361815	2.957931751	1.932426799	2.067653586	0.693147181	7.292561794	7.238446552	6.881722344	3.070867575	3.153124836	2.400827334	emb|LN590705.1| Cyprinus carpio genome assembly common carp genome ,scaffold LG11
File_R_cluster_1_biclust_result_1_bclustnum_35817_kamer_1_number_1	emb|LN590705.1| Cyprinus carpio genome assembly common carp genome ,scaffold LG11	6.557346377	6.766344929	7.15549778	1.88504791	0.693147181	1.331487005	1.098612289	0.693147181	0.693147181	0	0.693147181	0	0	0	0	0.693147181	0.98394938	1.031920339	0	0	1.05977097	0	0	0	1.211940974	1.540445755	1.368275492	1.098612289	1.098612289	1.086637543	emb|LN590705.1| Cyprinus carpio genome assembly common carp genome ,scaffold LG11
File_R_cluster_1_biclust_result_1_bclustnum_360403_kamer_1_number_1	emb|LN590674.1| Cyprinus carpio genome assembly common carp genome ,scaffold LG42	8.705796642	8.665847652	8.876677186	3.539639613	2.558939024	2.880220407	1.834138651	1.756513911	1.836211667	0	3.037694418	2.40025612	0	1.071213685	1.073294481	2.640755886	2.76000994	2.315829991	1.737692155	1.440019945	2.152373644	0.693147181	0	0.693147181	5.284654453	5.615919826	5.384077544	2.119224597	1.754268725	2.028945298	emb|LN590674.1| Cyprinus carpio genome assembly common carp genome ,scaffold LG42
File_R_cluster_1_biclust_result_1_bclustnum_36091_kamer_1_number_1	emb|LN590717.1| Cyprinus carpio genome assembly common carp genome ,scaffold LG12	0	0	0.693147181	0	0	0	0	0	0	7.377133713	0	0	0	0	0	0	0	0	0	0	0	0	0	0	0	0	0	0	0	0	emb|LN590717.1| Cyprinus carpio genome assembly common carp genome ,scaffold LG12
File_R_cluster_1_biclust_result_1_bclustnum_36159_kamer_1_number_1	emb|LN590674.1| Cyprinus carpio genome assembly common carp genome ,scaffold LG42	4.372927866	4.181275797	4.391402543	2.28356434	2.624458425	2.698343241	1.922872523	2.298227613	2.125467174	0	2.596768486	2.841700753	2.515678308	3.01693588	2.660070708	4.489277737	2.767507083	2.562746934	2.311243501	2.348726037	3.258654075	3.246374254	3.275524553	3.327995665	8.525583891	8.275549564	8.580706813	1.568011569	2.674645078	1.916922612	emb|LN590674.1| Cyprinus carpio genome assembly common carp genome ,scaffold LG42
File_R_cluster_1_biclust_result_1_bclustnum_363149_kamer_1_number_1	emb|LN590705.1| Cyprinus carpio genome assembly common carp genome ,scaffold LG11	6.044045138	6.376589183	6.065887648	1.896443756	2.061422673	1.351203309	0.693147181	0.879249083	0	0	0	0.693147181	0	0.693147181	0	1.031603163	0.693147181	0.693147181	0	0	0.693147181	0	0	0	1.360091546	2.395434976	1.018944788	1.368275492	0.693147181	1.040548759	emb|LN590705.1| Cyprinus carpio genome assembly common carp genome ,scaffold LG11
File_R_cluster_1_biclust_result_1_bclustnum_36623_kamer_1_number_1	emb|LN590713.1| Cyprinus carpio genome assembly common carp genome ,scaffold LG20	6.60109424	7.028236892	6.548130274	2.35967406	3.442278543	2.928363083	2.142092345	2.104134154	1.476320149	0	1.116962882	0.693147181	0	0	0	0	0.693147181	0	0.693147181	0	1.301953053	0	0	0	2.061655555	2.365559892	2.972975286	2.630362496	2.532155945	2.197224577	emb|LN590713.1| Cyprinus carpio genome assembly common carp genome ,scaffold LG20
File_R_cluster_1_biclust_result_1_bclustnum_366450_kamer_1_number_1	emb|LN590705.1| Cyprinus carpio genome assembly common carp genome ,scaffold LG11	6.039714089	6.267908078	6.155764265	0.693147181	1.319951547	1.924734666	0.693147181	0	0.693147181	0	1.112597373	1.379604534	0	0.693147181	0	0.693147181	0.693147181	0	0	0	0.693147181	0	0	0	2.846460506	2.79890806	3.500943164	0	0	0	emb|LN590705.1| Cyprinus carpio genome assembly common carp genome ,scaffold LG11
File_R_cluster_1_biclust_result_1_bclustnum_36827_kamer_1_number_1	emb|LN590705.1| Cyprinus carpio genome assembly common carp genome ,scaffold LG11	6.054831288	6.374714721	6.113146638	1.561647948	1.429466392	1.377326772	0.693147181	0.693147181	1.045123604	0	0.693147181	0.693147181	0	0	0	0	1.086637543	0.693147181	0	0	0.909370845	0	0	0	1.504077397	2.288855269	1.459319426	0	1.368275492	0	emb|LN590705.1| Cyprinus carpio genome assembly common carp genome ,scaffold LG11
File_R_cluster_1_biclust_result_1_bclustnum_3683_kamer_1_number_1	emb|LN590698.1| Cyprinus carpio genome assembly common carp genome ,scaffold LG17	0	0	0	0	0	0	0	0	0	6.750929524	0	0	0	0	0	0	0	0	0	0	0	0	0	0	0.693147181	0	0.693147181	0	0	0	emb|LN590698.1| Cyprinus carpio genome assembly common carp genome ,scaffold LG17
File_R_cluster_1_biclust_result_1_bclustnum_36893_kamer_1_number_1	emb|LN590698.1| Cyprinus carpio genome assembly common carp genome ,scaffold LG17	6.338468629	6.263017238	5.390960356	3.004974433	3.180430171	2.822229715	1.654770678	1.421386371	2.360854001	0	1.371906348	1.803594162	1.064710737	1.326191322	0	0	1.330054643	0.693147181	0	0.693147181	0.693147181	0.693147181	1.280933845	1.734601644	2.673161956	2.354092514	2.777930679	2.081251153	2.005333377	2.970414466	emb|LN590698.1| Cyprinus carpio genome assembly common carp genome ,scaffold LG17
File_R_cluster_1_biclust_result_1_bclustnum_372237_kamer_1_number_1	emb|LN590688.1| Cyprinus carpio genome assembly common carp genome ,scaffold LG48	5.832556737	5.993038308	6.027709684	5.979189516	5.717826724	6.065321238	4.863248355	4.611601461	4.928325574	2.90690106	3.509055775	3.679258319	0	0	0	0	0	0	2.512302921	2.337270537	2.379997884	0.693147181	0	0	5.220561209	5.132357229	5.022840507	5.259987057	5.429880574	5.359755775	emb|LN590688.1| Cyprinus carpio genome assembly common carp genome ,scaffold LG48
File_R_cluster_1_biclust_result_1_bclustnum_372469_kamer_1_number_1	emb|LN590674.1| Cyprinus carpio genome assembly common carp genome ,scaffold LG42	6.067969466	6.188177877	6.173463135	3.150331424	3.058847908	3.224440314	1.498772238	1.500600247	1.203971804	0	1.294148918	1.372109226	0	0	0	0	0	0.693147181	0.693147181	0.693147181	0.693147181	0	0	0	2.228043642	1.772800886	2.15241664	2.807394657	2.159484634	2.570067009	emb|LN590674.1| Cyprinus carpio genome assembly common carp genome ,scaffold LG42
File_R_cluster_1_biclust_result_1_bclustnum_373_kamer_1_number_1	emb|LN591675.1| Cyprinus carpio genome assembly common carp genome ,scaffold 000002927	0	0	0	0	0	0	0.693147181	0	0	9.497847429	0	0.693147181	0	0	0	0	0	0	0	0	0	0	0	0.693147181	0	0.693147181	0.693147181	0.693147181	0	0	emb|LN591675.1| Cyprinus carpio genome assembly common carp genome ,scaffold 000002927
File_R_cluster_1_biclust_result_1_bclustnum_375137_kamer_1_number_1	emb|LN590705.1| Cyprinus carpio genome assembly common carp genome ,scaffold LG11	7.839194688	7.507574813	6.612930424	2.826271659	3.103002465	2.941339444	1.926821981	1.860425398	1.685854361	0	1.834932298	2.101260517	1.362577835	1.718428631	1.370032857	2.397895273	3.316205782	2.472201277	1.192139061	1.641277607	1.52669523	2.132084987	2.292860967	1.874280641	3.538826617	3.693648066	3.511984149	1.874062697	1.834932298	1.037987875	emb|LN590705.1| Cyprinus carpio genome assembly common carp genome ,scaffold LG11
File_R_cluster_1_biclust_result_1_bclustnum_375580_kamer_1_number_1	emb|LN591055.1| Cyprinus carpio genome assembly common carp genome ,scaffold 000001389	4.796806558	4.802125807	4.760197624	1.836879414	3.278596509	3.357395257	2.123116263	2.332890219	2.081362196	0	2.462874038	2.73934859	2.242766084	2.149509668	2.516655609	7.010284791	1.685276101	2.369074834	1.076138296	1.595547891	2.397895273	4.02189035	3.749882828	3.486683707	2.934675683	4.51978004	3.128110502	2.821378886	2.383810178	2.245607251	emb|LN591055.1| Cyprinus carpio genome assembly common carp genome ,scaffold 000001389
File_R_cluster_1_biclust_result_1_bclustnum_3758_kamer_1_number_1	emb|LN590698.1| Cyprinus carpio genome assembly common carp genome ,scaffold LG17	0.693147181	0	0	0	0	0	0	0.693147181	0	8.436945796	0	0	0	0	0	0	0	0	0	0	0	0	0	0	0	0	0	0	0	0	emb|LN590698.1| Cyprinus carpio genome assembly common carp genome ,scaffold LG17
File_R_cluster_1_biclust_result_1_bclustnum_378768_kamer_1_number_1	emb|LN590705.1| Cyprinus carpio genome assembly common carp genome ,scaffold LG11	6.034301311	6.067251288	6.690373845	2.890371758	2.757068911	2.739439043	2.285041093	2.1760679	1.784486418	0	0.693147181	1.612331721	0.693147181	0.693147181	1.039424759	0.693147181	1.721142065	2.047692843	0.693147181	1.165946897	1.32175584	0.693147181	0	0	2.98260144	3.730398006	3.141774454	1.208312375	0.693147181	0	emb|LN590705.1| Cyprinus carpio genome assembly common carp genome ,scaffold LG11
File_R_cluster_1_biclust_result_1_bclustnum_37915_kamer_1_number_1	emb|LN590713.1| Cyprinus carpio genome assembly common carp genome ,scaffold LG20	6.256833907	6.579512289	6.497474595	3.57177525	3.032020807	3.00007284	1.555853575	2.409680104	1.883990671	0	0.871837151	1.834319153	0.693147181	0	0	1.076138296	1.819930578	0.693147181	0.693147181	0	1.342235362	0.693147181	0.693147181	1.602749595	3.875419185	4.16475332	4.242472858	1.815627352	2.120263136	1.484273703	emb|LN590713.1| Cyprinus carpio genome assembly common carp genome ,scaffold LG20
File_R_cluster_1_biclust_result_1_bclustnum_37948_kamer_1_number_1	emb|LN590674.1| Cyprinus carpio genome assembly common carp genome ,scaffold LG42	6.252454791	6.448992237	6.102267725	1.400478292	2.701723563	2.268175826	0.693147181	1.386294361	1.125640383	0	2.135411819	2.544770198	0	0.693147181	0	0	0	1.259880436	0.693147181	0	0	0	0	0.693147181	1.670681637	2.866380705	1.71063437	1.386294361	1.085189268	1.579257017	emb|LN590674.1| Cyprinus carpio genome assembly common carp genome ,scaffold LG42
File_R_cluster_1_biclust_result_1_bclustnum_38108_kamer_1_number_1	emb|LN590674.1| Cyprinus carpio genome assembly common carp genome ,scaffold LG42	5.803111839	6.266551382	5.92388942	1.855869774	3.490260818	3.239482051	1.680801837	1.386294361	2.079441542	0	1.858009026	1.56461208	0	1.037987875	1.089309148	0	1.037987875	1.358894901	0.693147181	0	1.05977097	0	0	0	2.932835071	3.0785097	3.41254937	1.32818579	1.086637543	1.061398361	emb|LN590674.1| Cyprinus carpio genome assembly common carp genome ,scaffold LG42
File_R_cluster_1_biclust_result_1_bclustnum_38127_kamer_1_number_1	emb|LN590674.1| Cyprinus carpio genome assembly common carp genome ,scaffold LG42	6.89799581	6.744897469	6.543222399	1.027660357	1.965291119	1.293038071	1.382863482	1.011600912	0.693147181	0	1.570326953	1.471590935	1.019363432	0.693147181	1.365816106	1.563976003	1.306828987	1.337841765	0	1.070833335	0	0	0	0	1.474730972	2.008489162	1.2148712	0.913546971	0.693147181	0.851205928	emb|LN590674.1| Cyprinus carpio genome assembly common carp genome ,scaffold LG42
File_R_cluster_1_biclust_result_1_bclustnum_381599_kamer_1_number_1	emb|LN590674.1| Cyprinus carpio genome assembly common carp genome ,scaffold LG42	4.306056353	4.589237939	4.333533364	4.001971565	6.841275675	6.752709532	3.454918227	3.49052912	3.555348061	0	1.808019883	2.377486607	0.693147181	0.693147181	2.184802182	1.371025889	0.693147181	0.693147181	0	0	1.03079016	0	0	0	5.17754424	7.67521184	5.207166525	0	0	1.029619417	emb|LN590674.1| Cyprinus carpio genome assembly common carp genome ,scaffold LG42
File_R_cluster_1_biclust_result_1_bclustnum_381849_kamer_1_number_1	emb|LN590674.1| Cyprinus carpio genome assembly common carp genome ,scaffold LG42	6.099397002	6.145009329	6.201093182	2.730652826	2.761786841	2.81640822	2.087740758	2.142092345	2.678738102	0	1.531476371	1.269569515	0	0	0	0	1.311174724	0	0.693147181	0	1.06686359	0	0	0	2.05375187	2.400383085	2.890371758	3.044522438	2.660259537	2.540617257	emb|LN590674.1| Cyprinus carpio genome assembly common carp genome ,scaffold LG42
File_R_cluster_1_biclust_result_1_bclustnum_38316_kamer_1_number_1	emb|LN590698.1| Cyprinus carpio genome assembly common carp genome ,scaffold LG17	5.922344882	5.706777984	6.099325185	3.408695864	2.559441912	2.739917017	1.276956502	1.382715465	1.815627352	0	0.902402739	1.164056649	0	0	0	0	1.614079125	0	0	1.03375016	1.087440112	0	0	0	2.867898902	3.432602375	2.879198457	1.887069649	1.774706558	2.263915988	emb|LN590698.1| Cyprinus carpio genome assembly common carp genome ,scaffold LG17
File_R_cluster_1_biclust_result_1_bclustnum_384307_kamer_1_number_1	emb|LN590674.1| Cyprinus carpio genome assembly common carp genome ,scaffold LG42	6.757529885	6.627214315	6.362955687	3.48226418	3.036552668	3.184644564	2.245080972	2.041983674	2.861331932	0	1.212137383	1.06582391	0	0.693147181	0	1.077558879	2.1690537	0.693147181	1.35812377	1.057370067	1.370032857	0	0	0	2.217649016	2.232585286	2.998852401	2.21557408	2.523229524	2.197224577	emb|LN590674.1| Cyprinus carpio genome assembly common carp genome ,scaffold LG42
File_R_cluster_1_biclust_result_1_bclustnum_385197_kamer_1_number_1	emb|LN590674.1| Cyprinus carpio genome assembly common carp genome ,scaffold LG42	6.158793017	6.426603338	6.125932064	3.165348458	2.539347485	2.277999325	2.136964889	1.892106941	1.963077655	0	1.547562509	1.02715209	0.693147181	0	0	0	0	0	0	1.08780072	0.693147181	0	0	0	1.664603898	2.282382386	1.759497951	2.373353853	2.562384533	2.120263136	emb|LN590674.1| Cyprinus carpio genome assembly common carp genome ,scaffold LG42
File_R_cluster_1_biclust_result_1_bclustnum_385927_kamer_1_number_1	emb|LN591305.1| Cyprinus carpio genome assembly common carp genome ,scaffold 000001301	6.303104206	6.512159805	6.085102876	1.032764466	1.336696996	1.954277899	1.464072198	2.106641983	0.693147181	0	0.693147181	0.693147181	0.693147181	0.693147181	0.693147181	1.078202077	1.840919406	0	0	0.85566561	0	0.693147181	0.693147181	1.031920339	2.446174484	2.889554758	1.707419067	0.693147181	0.693147181	0.874242986	emb|LN591305.1| Cyprinus carpio genome assembly common carp genome ,scaffold 000001301
File_R_cluster_1_biclust_result_1_bclustnum_386501_kamer_1_number_1	emb|LN590687.1| Cyprinus carpio genome assembly common carp genome ,scaffold LG13	6.067204936	6.35295861	6.091094927	2.739917017	3.661297547	2.782953571	2.245832714	2.316283835	2.160724249	0	1.157057282	1.059393176	0	0	0	0.693147181	0	0.693147181	0	0	0.890505122	0	0	0	2.876813593	2.221615789	2.051790244	2.744626395	3.005682604	2.969532025	emb|LN590687.1| Cyprinus carpio genome assembly common carp genome ,scaffold LG13
File_R_cluster_1_biclust_result_1_bclustnum_38726_kamer_1_number_1	emb|LN590674.1| Cyprinus carpio genome assembly common carp genome ,scaffold LG42	6.702482343	6.771244596	7.157190164	1.737818814	1.985302551	1.553085527	0.874326418	0	0	0	0.919026985	1.791759469	0	0	0	1.563976003	1.484924025	1.315676062	0.693147181	1.226993777	1.108229231	0	0	0.693147181	1.631119166	1.895748545	1.48098162	1.699050071	1.360091546	0.693147181	emb|LN590674.1| Cyprinus carpio genome assembly common carp genome ,scaffold LG42
File_R_cluster_1_biclust_result_1_bclustnum_388416_kamer_1_number_1	emb|LN590705.1| Cyprinus carpio genome assembly common carp genome ,scaffold LG11	6.164593986	6.330996384	6.014475258	1.579257017	1.377326772	1.368275492	0	0.693147181	1.574347378	0	0	0.693147181	0	1.088760586	0.693147181	1.027517209	0.693147181	1.014056077	0	1.088460938	0	0	0	0	1.95360192	2.546064463	1.981933448	1.166666498	0.693147181	1.086637543	emb|LN590705.1| Cyprinus carpio genome assembly common carp genome ,scaffold LG11
File_R_cluster_1_biclust_result_1_bclustnum_3886_kamer_1_number_1	emb|LN594651.1| Cyprinus carpio genome assembly common carp genome ,scaffold 000003052	0	0	0	0	0	0	0	0	0	7.281069027	0	0	0	0.693147181	0	0	0	0	0	0	0	0	0	0	0	0	0	0	0	0	emb|LN594651.1| Cyprinus carpio genome assembly common carp genome ,scaffold 000003052
File_R_cluster_1_biclust_result_1_bclustnum_389_kamer_1_number_1	emb|LN590674.1| Cyprinus carpio genome assembly common carp genome ,scaffold LG42	7.577828287	7.736730588	7.711768293	3.284566182	2.855412175	3.128027277	2.369074834	2.138035869	1.451892477	0	2.211738735	2.620078363	0	0	0	0	1.348073148	0.693147181	0	0	0.693147181	0.693147181	0	0	4.547484928	4.121601364	4.977733243	2.57515099	2.415913778	2.406945108	emb|LN590674.1| Cyprinus carpio genome assembly common carp genome ,scaffold LG42
File_R_cluster_1_biclust_result_1_bclustnum_39155_kamer_1_number_1	emb|LN590674.1| Cyprinus carpio genome assembly common carp genome ,scaffold LG42	5.863139578	6.008206122	5.986328882	1.609437912	1.32818579	1.06582391	0.693147181	0	0.980830503	0	2.194477474	2.253239375	0	0.693147181	0	0	1.098612289	0.693147181	0	0.944462164	0.693147181	0	0	0	0.693147181	1.203971804	0.693147181	0.693147181	0.847296432	0.693147181	emb|LN590674.1| Cyprinus carpio genome assembly common carp genome ,scaffold LG42
File_R_cluster_1_biclust_result_1_bclustnum_39192_kamer_1_number_1	emb|LN591305.1| Cyprinus carpio genome assembly common carp genome ,scaffold 000001301	7.546704952	7.498703607	7.597637134	3.145181921	4.021345462	4.146682394	3.230745105	3.378044749	4.067112102	0	1.945910149	2.653875567	1.029619417	1.045123604	0	2.355973242	1.842815319	1.582409925	1.056052674	1.621307193	1.596449933	0	0	0	1.989712384	3.783170933	2.419372077	1.039424759	0.693147181	2.110665219	emb|LN591305.1| Cyprinus carpio genome assembly common carp genome ,scaffold 000001301
File_R_cluster_1_biclust_result_1_bclustnum_392926_kamer_1_number_1	emb|LN590705.1| Cyprinus carpio genome assembly common carp genome ,scaffold LG11	6.137351174	6.132486565	6.119629064	2.551482157	2.589176571	2.400528167	2.000303633	1.684786543	1.164056649	0	0	1.093770587	0	0	0	1.077558879	1.05977097	0.693147181	0	0	1.338285142	0.693147181	0	0	3.050712762	4.160692383	3.028523709	1.216931477	0	0	emb|LN590705.1| Cyprinus carpio genome assembly common carp genome ,scaffold LG11
File_R_cluster_1_biclust_result_1_bclustnum_393840_kamer_1_number_1	emb|LN590674.1| Cyprinus carpio genome assembly common carp genome ,scaffold LG42	5.514359764	5.493756675	5.081497528	2.688371166	3.800145746	3.570183189	3.361978269	3.271031747	3.08190997	0	1.819574033	1.449630597	0.693147181	0	0.693147181	0	0	0	0.693147181	0.693147181	1.051359941	1.063520374	1.924518689	1.579360076	9.028205598	9.003196884	9.087560121	2.046202701	2.314817965	2.015927829	emb|LN590674.1| Cyprinus carpio genome assembly common carp genome ,scaffold LG42
File_R_cluster_1_biclust_result_1_bclustnum_39400_kamer_1_number_1	emb|LN590705.1| Cyprinus carpio genome assembly common carp genome ,scaffold LG11	5.930628497	6.078272778	6.421999432	1.086637543	1.74469232	0.693147181	0.693147181	1.476320149	0	0	1.439216453	1.314970203	0	0	0.693147181	0.693147181	0.693147181	1.053151077	0	0.693147181	0	1.088140989	0	0.693147181	2.76986627	2.193998267	3.241232052	0	1.178654996	0	emb|LN590705.1| Cyprinus carpio genome assembly common carp genome ,scaffold LG11
File_R_cluster_1_biclust_result_1_bclustnum_39418_kamer_1_number_1	emb|LN590713.1| Cyprinus carpio genome assembly common carp genome ,scaffold LG20	5.960443326	6.015156659	5.9573647	2.822598381	2.870781108	3.546062224	1.786772053	2.397895273	1.971552833	0	1.164125335	1.241713577	0.693147181	0.953428508	0	0.693147181	1.732336729	1.598856122	0	0.693147181	0.950614861	0	0	0	2.311500235	2.104759568	2.301302271	2.678738102	2.317184008	2.433385259	emb|LN590713.1| Cyprinus carpio genome assembly common carp genome ,scaffold LG20
File_R_cluster_1_biclust_result_1_bclustnum_394314_kamer_1_number_1	emb|LN590698.1| Cyprinus carpio genome assembly common carp genome ,scaffold LG17	6.128873724	6.506713374	6.184705437	2.807448981	2.7742748	3.614514141	1.905704036	1.764360865	1.662081595	0	1.590338678	0.871222234	0	0	0.693147181	1.078810861	0.693147181	0	0.879249083	0	0.693147181	0	0	0	2.071598364	2.808263493	2.459819584	2.947827967	2.392012549	2.204605052	emb|LN590698.1| Cyprinus carpio genome assembly common carp genome ,scaffold LG17
File_R_cluster_1_biclust_result_1_bclustnum_396098_kamer_1_number_1	emb|LN590705.1| Cyprinus carpio genome assembly common carp genome ,scaffold LG11	6.547524019	6.629324944	5.467562127	2.475058314	2.090411155	2.259001998	1.098612289	1.827864758	0	0	1.832581464	1.702069964	0.693147181	0.693147181	1.076138296	2.154664963	2.264666172	1.098612289	0	0.693147181	0.693147181	1.736496904	1.086188769	2.222819764	3.158875258	2.568335924	2.462601394	1.218570734	1.439974929	1.201027471	emb|LN590705.1| Cyprinus carpio genome assembly common carp genome ,scaffold LG11
File_R_cluster_1_biclust_result_1_bclustnum_39745_kamer_1_number_1	emb|LN591126.1| Cyprinus carpio genome assembly common carp genome ,scaffold 000028826	6.589795426	6.677619841	6.610596444	4.399339646	4.513119588	4.490452697	1.467468736	1.918218831	1.076870983	0	3.691815141	3.636424959	0	0	0	0.693147181	0	0	2.237262264	1.386294361	2.522194406	0	0	0	3.591250087	3.945571895	3.462515097	3.115597584	3.338580568	3.265423476	emb|LN591126.1| Cyprinus carpio genome assembly common carp genome ,scaffold 000028826
File_R_cluster_1_biclust_result_1_bclustnum_39826_kamer_1_number_1	emb|LN590705.1| Cyprinus carpio genome assembly common carp genome ,scaffold LG11	5.493320669	5.715025699	6.014612064	1.260254834	1.74469232	1.359264833	1.595048885	0	0.693147181	0	0.693147181	1.041452698	0	0	0	0.693147181	0.693147181	0	0.693147181	0.693147181	0.693147181	0	0	0	2.598458524	2.920847076	3.223421478	1.098612289	1.667706821	1.075353897	emb|LN590705.1| Cyprinus carpio genome assembly common carp genome ,scaffold LG11
File_R_cluster_1_biclust_result_1_bclustnum_40114_kamer_1_number_1	emb|LN590674.1| Cyprinus carpio genome assembly common carp genome ,scaffold LG42	8.949348266	8.960828461	8.982805945	3.460990285	2.674148649	3.532775201	1.669910052	2.218367265	2.030866917	0	2.5560328	3.255628109	0	1.080913247	1.311174724	2.226598897	2.703386007	2.123335214	1.347072648	0.927986074	1.829981286	0	0	0	2.769377321	2.657205929	2.472007141	2.301285249	2.273597997	2.862200881	emb|LN590674.1| Cyprinus carpio genome assembly common carp genome ,scaffold LG42
File_R_cluster_1_biclust_result_1_bclustnum_404535_kamer_1_number_1	emb|LN590674.1| Cyprinus carpio genome assembly common carp genome ,scaffold LG42	5.734486252	6.031019339	5.798095187	3.48395026	3.526360525	3.61250584	1.715051196	1.866921053	2.292534757	0	1.458984722	1.20074159	0	0	0.693147181	1.043043199	1.296886478	0	0.693147181	1.087052396	0	0	0	0	3.00015249	2.854577612	3.473617263	2.288855269	2.884979468	2.70374093	emb|LN590674.1| Cyprinus carpio genome assembly common carp genome ,scaffold LG42
File_R_cluster_1_biclust_result_1_bclustnum_407_kamer_1_number_1	emb|LN590998.1| Cyprinus carpio genome assembly common carp genome ,scaffold 000001083	0	0	0	0	1.098612289	0	0.693147181	0.693147181	0.693147181	7.257728819	0	0	0	0	0	0	0	0	0	0	0	0	0.693147181	0	0	1.098612289	0	0	0	0	emb|LN590998.1| Cyprinus carpio genome assembly common carp genome ,scaffold 000001083
File_R_cluster_1_biclust_result_1_bclustnum_407817_kamer_1_number_1	emb|LN590713.1| Cyprinus carpio genome assembly common carp genome ,scaffold LG20	6.221822015	6.486122678	6.450530452	3.386029597	3.11539798	3.432518384	2.397895273	2.138035869	2.058657032	0	1.549619965	0.87007924	0	0	0	0.693147181	0.693147181	0	1.068757709	0.693147181	0	0	0	0	3.526360525	3.372955645	3.528963018	2.739800774	2.730776654	2.678738102	emb|LN590713.1| Cyprinus carpio genome assembly common carp genome ,scaffold LG20
File_R_cluster_1_biclust_result_1_bclustnum_408682_kamer_1_number_1	emb|LN590674.1| Cyprinus carpio genome assembly common carp genome ,scaffold LG42	6.301975912	6.391893663	6.365007178	2.982809128	2.43645143	2.185139625	2.072662365	1.679870281	1.609437912	0	1.762042254	0.872083848	0.693147181	0	0	1.071213685	1.744356842	0.693147181	0.693147181	1.056052674	1.057227636	0	0	0	3.001793865	3.259134461	2.717908118	0.693147181	1.040548759	1.377326772	emb|LN590674.1| Cyprinus carpio genome assembly common carp genome ,scaffold LG42
File_R_cluster_1_biclust_result_1_bclustnum_409292_kamer_1_number_1	emb|LN590713.1| Cyprinus carpio genome assembly common carp genome ,scaffold LG20	6.043836385	5.878013054	5.560235378	5.379676131	6.267200549	5.642963251	4.562808465	4.624541348	4.411226149	3.68399002	2.826401964	2.377293599	0	0	0	0	0	0.693147181	1.624143257	1.386294361	1.937301775	0.693147181	0.693147181	0.693147181	4.959110394	4.495578509	4.569483939	4.561137835	4.765620978	5.285693014	emb|LN590713.1| Cyprinus carpio genome assembly common carp genome ,scaffold LG20
File_R_cluster_1_biclust_result_1_bclustnum_409881_kamer_1_number_1	emb|LN590713.1| Cyprinus carpio genome assembly common carp genome ,scaffold LG20	6.791549499	6.679267473	6.357890792	3.18434649	3.214016035	2.471888953	1.054649952	1.224807252	2.124255956	0	1.349925976	1.205380813	0	0.934307452	0.693147181	1.067840318	1.468210697	0	0.922936599	0	0.900291423	0	0	0	2.821378886	2.063469668	1.892106941	2.468099531	1.587777	1.909542505	emb|LN590713.1| Cyprinus carpio genome assembly common carp genome ,scaffold LG20
File_R_cluster_1_biclust_result_1_bclustnum_413308_kamer_1_number_1	emb|LN590705.1| Cyprinus carpio genome assembly common carp genome ,scaffold LG11	5.955920268	5.727267855	6.111607019	0	3.089641472	2.838715825	0	0.693147181	0.693147181	0	1.836444393	1.237257666	0	0	0.693147181	1.771350958	1.386294361	1.354545663	0	0.693147181	1.098612289	0	0	0	1.421386371	4.0831707	1.219974098	0	0.693147181	0	emb|LN590705.1| Cyprinus carpio genome assembly common carp genome ,scaffold LG11
File_R_cluster_1_biclust_result_1_bclustnum_41338_kamer_1_number_1	emb|LN590674.1| Cyprinus carpio genome assembly common carp genome ,scaffold LG42	6.421557225	6.621299121	6.419778292	3.61845699	3.326951451	3.390473418	2.783361734	2.526264501	1.352393672	0	2.2782924	2.17777782	0	0	0	1.071213685	1.350954707	0	0	0.693147181	1.355835154	0	0	0	3.789025649	3.749346416	3.858341599	2.32653792	1.852122096	2.285777636	emb|LN590674.1| Cyprinus carpio genome assembly common carp genome ,scaffold LG42
File_R_cluster_1_biclust_result_1_bclustnum_414107_kamer_1_number_1	emb|LN590674.1| Cyprinus carpio genome assembly common carp genome ,scaffold LG42	5.949467383	6.063947986	6.189546668	1.184058831	0.693147181	0.693147181	0	0.693147181	0	0	0.693147181	0.693147181	0	0	0.693147181	0	0.693147181	1.08780072	0.693147181	0.693147181	1.079381898	0	0.693147181	0	1.23448843	1.217958546	0	1.343733877	0	1.086637543	emb|LN590674.1| Cyprinus carpio genome assembly common carp genome ,scaffold LG42
File_R_cluster_1_biclust_result_1_bclustnum_41951_kamer_1_number_1	emb|LN590674.1| Cyprinus carpio genome assembly common carp genome ,scaffold LG42	6.765294999	7.049159351	6.818452916	1.197983907	2.159484634	1.528468609	0.693147181	0.888121683	0.693147181	0	1.652922599	0.693147181	0	1.021652048	0.693147181	1.069626222	2.2300144	1.063520374	1.069626222	0	0.693147181	1.079381898	0.693147181	0.693147181	1.086637543	1.260668778	0.8766264	0.693147181	0.693147181	1.086637543	emb|LN590674.1| Cyprinus carpio genome assembly common carp genome ,scaffold LG42
File_R_cluster_1_biclust_result_1_bclustnum_421641_kamer_1_number_1	emb|LN590713.1| Cyprinus carpio genome assembly common carp genome ,scaffold LG20	6.513939058	6.631881876	6.873930621	4.633184106	4.776540328	4.753521223	3.925343887	3.891091461	4.605378164	3.23358314	2.901152327	2.906698854	0	0	0	1.34117408	1.353505122	0	2.115306872	1.900959106	2.140066163	0	0	1.008665699	4.811907894	4.713360693	4.931772446	4.725908849	4.987318901	4.495707936	emb|LN590713.1| Cyprinus carpio genome assembly common carp genome ,scaffold LG20
File_R_cluster_1_biclust_result_1_bclustnum_42203_kamer_1_number_1	emb|LN590705.1| Cyprinus carpio genome assembly common carp genome ,scaffold LG11	6.60203007	6.540416535	6.728596316	1.578838489	1.362029844	1.508761963	0	0.874326418	0	0	1.684339427	1.181810014	0	1.041452698	0	0	1.270911568	0.693147181	1.02528145	0	0	1.078202077	0	0.693147181	1.190179107	1.86439791	1.883326288	1.165750553	1.587777	0	emb|LN590705.1| Cyprinus carpio genome assembly common carp genome ,scaffold LG11
File_R_cluster_1_biclust_result_1_bclustnum_429219_kamer_1_number_1	emb|LN590674.1| Cyprinus carpio genome assembly common carp genome ,scaffold LG42	6.436639031	6.305495786	6.615672873	3.632438724	2.948530597	3.172957533	1.953027617	1.876538634	2.782619495	0	2.315910909	2.489977107	0	0	0.693147181	0	1.373049534	1.006237463	0.693147181	0.693147181	1.038894131	0	0	0	3.827048825	3.817980422	3.371493902	1.774291115	2.081226198	1.945910149	emb|LN590674.1| Cyprinus carpio genome assembly common carp genome ,scaffold LG42
File_R_cluster_1_biclust_result_1_bclustnum_42956_kamer_1_number_1	emb|LN590674.1| Cyprinus carpio genome assembly common carp genome ,scaffold LG42	6.748962341	6.684127861	6.752021513	1.347896509	1.640936579	1.222760211	0.88239056	1.020048764	1.098612289	0	1.474730972	1.92181211	0	0	0.693147181	0.693147181	1.053761356	0.693147181	0.916290732	0	0.693147181	0	0	0	2.091040266	2.595254707	1.805004696	1.030626053	0.693147181	1.098612289	emb|LN590674.1| Cyprinus carpio genome assembly common carp genome ,scaffold LG42
File_R_cluster_1_biclust_result_1_bclustnum_432087_kamer_1_number_1	emb|LN590717.1| Cyprinus carpio genome assembly common carp genome ,scaffold LG12	6.201395191	5.998109918	6.19459925	6.197988759	6.496702589	6.512758189	5.215674615	5.244425963	5.416100402	1.098612289	3.995628589	3.736569013	0	0	0	0	0	0	3.17805383	2.470478056	3.207814878	0	0	0	5.248528204	7.144612368	5.268718614	5.819643665	5.996561535	5.931921528	emb|LN590717.1| Cyprinus carpio genome assembly common carp genome ,scaffold LG12
File_R_cluster_1_biclust_result_1_bclustnum_433533_kamer_1_number_1	emb|LN590705.1| Cyprinus carpio genome assembly common carp genome ,scaffold LG11	7.108113198	7.117319041	7.214717784	5.109629588	5.344413429	5.326326425	3.34835552	3.122809759	2.066679198	0	1.899291625	1.848113022	0	0	0	0	0.693147181	0.693147181	1.677815928	1.452868309	1.375364851	0	0	0	3.354353822	4.202744454	3.418437906	3.230405107	3.245194432	3.787117163	emb|LN590705.1| Cyprinus carpio genome assembly common carp genome ,scaffold LG11
File_R_cluster_1_biclust_result_1_bclustnum_435980_kamer_1_number_1	emb|LN590674.1| Cyprinus carpio genome assembly common carp genome ,scaffold LG42	5.901028221	6.035450332	5.621751403	1.989585213	2.237157644	1.336696996	0.693147181	0.693147181	0.693147181	0	0.862830882	1.281694667	0	0	0.693147181	1.339773869	1.513045948	0.693147181	0	0.693147181	0.693147181	0	0	0.693147181	2.798091982	2.473736158	2.154858567	0.693147181	0.693147181	1.574347378	emb|LN590674.1| Cyprinus carpio genome assembly common carp genome ,scaffold LG42
File_R_cluster_1_biclust_result_1_bclustnum_43619_kamer_1_number_1	emb|LN590705.1| Cyprinus carpio genome assembly common carp genome ,scaffold LG11	6.203249837	5.918616934	6.127414887	0.693147181	1.746638316	1.846601127	1.235814436	1.068757709	1.606491576	0	0.693147181	0.693147181	0	0.693147181	0.693147181	1.736329561	2.004478204	2.068012731	1.248671754	0.693147181	0	0	0	0	2.172409207	2.965881129	1.766944099	0.693147181	1.083796407	0.693147181	emb|LN590705.1| Cyprinus carpio genome assembly common carp genome ,scaffold LG11
File_R_cluster_1_biclust_result_1_bclustnum_4370_kamer_1_number_1	emb|LN592699.1| Cyprinus carpio genome assembly common carp genome ,scaffold 000000883	0	0	0	0	0	0	0	0	0	9.232414926	0	0	0	0	0	0	0	0	0	0	0	0	0	0	0	0	0	0	0	0	emb|LN592699.1| Cyprinus carpio genome assembly common carp genome ,scaffold 000000883
File_R_cluster_1_biclust_result_1_bclustnum_437740_kamer_1_number_1	emb|LN590674.1| Cyprinus carpio genome assembly common carp genome ,scaffold LG42	6.26433687	6.64804499	6.321314907	3.454349447	3.265316565	2.252054665	2.728133835	1.786916092	1.916496051	0	1.577034548	1.341843394	0	1.076870983	0	1.584897238	1.845826164	1.596014216	0.893816058	0.693147181	0	1.098612289	1.076870983	0.693147181	3.408417917	3.096952229	3.695380775	1.432321187	1.648658626	1.382665284	emb|LN590674.1| Cyprinus carpio genome assembly common carp genome ,scaffold LG42
File_R_cluster_1_biclust_result_1_bclustnum_438860_kamer_1_number_1	emb|LN590698.1| Cyprinus carpio genome assembly common carp genome ,scaffold LG17	4.514515453	4.540205974	4.660699496	2.949007475	2.936014116	2.934473701	7.491299625	7.589568472	7.342889216	0	2.396577132	2.515823752	2.090411155	2.492692925	2.296685726	2.636955122	4.252949592	1.589894172	2.93215862	2.846762317	3.495616255	1.517870719	1.06686359	1.831367928	3.920393872	3.75714773	3.743862309	2.660560191	2.700293529	2.420048077	emb|LN590698.1| Cyprinus carpio genome assembly common carp genome ,scaffold LG17
File_R_cluster_1_biclust_result_1_bclustnum_439160_kamer_3_number_2	emb|LN590705.1| Cyprinus carpio genome assembly common carp genome ,scaffold LG11	6.094763189	6.367657029	6.077541321	1.981001469	1.360091546	1.945910149	1.086637543	0	1.086637543	0	1.053151077	1.077558879	0.693147181	0	0.693147181	0	0	0	0	0.693147181	0	0	0	0	0.880356771	1.876316587	1.174118568	1.086637543	1.098612289	0	emb|LN590705.1| Cyprinus carpio genome assembly common carp genome ,scaffold LG11
File_R_cluster_1_biclust_result_1_bclustnum_439524_kamer_1_number_1	emb|LN590674.1| Cyprinus carpio genome assembly common carp genome ,scaffold LG42	6.325847102	5.998971301	6.29349691	0.867218128	1.451053952	1.658898328	0	1.382554878	1.588939243	0	0.693147181	0	0	0	0	0	1.669156712	0.693147181	0.889856403	1.323775133	0.902106611	0	0	0	2.103790193	2.299764118	1.577961693	0.693147181	0.693147181	0.693147181	emb|LN590674.1| Cyprinus carpio genome assembly common carp genome ,scaffold LG42
File_R_cluster_1_biclust_result_1_bclustnum_441078_kamer_1_number_1	emb|LN590753.1| Cyprinus carpio genome assembly common carp genome ,scaffold 000000131	0	1.011600912	0.693147181	0	0	0	0	0	0	7.260698268	0	0	0	0	0	0	0	0	0	0	0	0	0	0	0	0	0	0	0	0	emb|LN590753.1| Cyprinus carpio genome assembly common carp genome ,scaffold 000000131
File_R_cluster_1_biclust_result_1_bclustnum_4429_kamer_1_number_1	emb|LN590674.1| Cyprinus carpio genome assembly common carp genome ,scaffold LG42	6.844815479	6.729038816	6.339981807	0.902869063	2.283839487	2.126529067	1.478351528	1.580449787	1.35644064	0	1.481604541	1.678430251	1.068757709	1.354545663	0.693147181	2.663952012	1.938363171	1.067840318	0.90479693	1.78698643	1.67576109	0.693147181	0.693147181	0.693147181	0.971861664	3.198673118	1.087440112	1.206826728	1.368275492	0.693147181	emb|LN590674.1| Cyprinus carpio genome assembly common carp genome ,scaffold LG42
File_R_cluster_1_biclust_result_1_bclustnum_443524_kamer_1_number_1	emb|LN590674.1| Cyprinus carpio genome assembly common carp genome ,scaffold LG42	6.085205314	6.062540248	6.057015836	1.524696684	2.233591864	1.350446952	0.693147181	0.693147181	0.693147181	0	0	0.880356771	0	0	0.693147181	0.693147181	0	0.693147181	0	0	0.919673006	0	0	0	1.324567882	1.055440313	1.375675682	1.075353897	1.581464273	1.075353897	emb|LN590674.1| Cyprinus carpio genome assembly common carp genome ,scaffold LG42
File_R_cluster_1_biclust_result_1_bclustnum_44508_kamer_1_number_1	emb|LN590674.1| Cyprinus carpio genome assembly common carp genome ,scaffold LG42	6.695735874	7.061805954	6.761394512	2.751537441	3.403331769	3.296310828	2.427745295	2.942410608	1.640130053	0	2.241800583	2.420936856	0	0	0.693147181	1.063827589	1.32175584	1.09002889	0.693147181	0.693147181	0.693147181	0	1.373391476	0	3.682126706	3.379163066	4.538920335	2.166093896	1.781018659	2.401026728	emb|LN590674.1| Cyprinus carpio genome assembly common carp genome ,scaffold LG42
File_R_cluster_1_biclust_result_1_bclustnum_446814_kamer_1_number_1	emb|LN590674.1| Cyprinus carpio genome assembly common carp genome ,scaffold LG42	6.129616498	6.14773726	6.193035065	3.528088443	3.447578297	3.768016367	1.686952504	2.625139496	2.493486405	0	1.440361056	1.382815818	0	0.693147181	0	0	0	0	0	0.693147181	0.693147181	0.693147181	0	0	2.209494548	2.166310513	2.424926612	2.877325919	2.676442568	2.132581754	emb|LN590674.1| Cyprinus carpio genome assembly common carp genome ,scaffold LG42
File_R_cluster_1_biclust_result_1_bclustnum_446918_kamer_1_number_1	emb|LN590713.1| Cyprinus carpio genome assembly common carp genome ,scaffold LG20	6.478377529	6.801131744	6.672658066	3.239274353	2.540680309	2.983538227	1.506922235	1.243442525	1.567177384	0	1.662978679	1.211634379	0	0	0	0.693147181	1.08180517	0.693147181	0	0.693147181	1.031603163	0	0	0	2.941835593	2.213961508	3.164588579	1.846601127	2.320603777	2.052568679	emb|LN590713.1| Cyprinus carpio genome assembly common carp genome ,scaffold LG20
File_R_cluster_1_biclust_result_1_bclustnum_451007_kamer_1_number_1	emb|LN590674.1| Cyprinus carpio genome assembly common carp genome ,scaffold LG42	6.629876992	6.568038585	6.321852239	1.272408721	1.318044963	1.029619417	0.693147181	0	0	0	1.168570472	0	0	0.970358374	1.06686359	1.624704779	1.702288707	0.693147181	0	0	0	0	0.693147181	0.693147181	0.693147181	1.444431185	1.075353897	0.693147181	0	0.693147181	emb|LN590674.1| Cyprinus carpio genome assembly common carp genome ,scaffold LG42
File_R_cluster_1_biclust_result_1_bclustnum_452778_kamer_1_number_1	emb|LN590674.1| Cyprinus carpio genome assembly common carp genome ,scaffold LG42	6.828030021	6.826975717	6.513473405	1.354986856	2.01215926	1.703501861	1.037417504	0.693147181	1.386294361	0	1.242929059	1.070833335	0	0.693147181	1.022900467	1.580449787	1.695615609	1.752919883	0.693147181	0.693147181	0.891325682	0	0	0	1.084817578	1.436388437	1.368275492	1.134490885	1.020524613	0.693147181	emb|LN590674.1| Cyprinus carpio genome assembly common carp genome ,scaffold LG42
File_R_cluster_1_biclust_result_1_bclustnum_45463_kamer_1_number_1	emb|LN590674.1| Cyprinus carpio genome assembly common carp genome ,scaffold LG42	6.432483397	6.530446048	6.188998966	3.380406066	2.906698854	3.196908296	1.535140999	1.963077655	2.482127792	0	2.182020693	2.214899671	0	0	0.693147181	0	1.001447724	0	1.333183627	0.693147181	1.040018728	0	0	0	3.710858633	3.451751069	3.990125987	1.624941114	1.486083133	2.343130889	emb|LN590674.1| Cyprinus carpio genome assembly common carp genome ,scaffold LG42
File_R_cluster_1_biclust_result_1_bclustnum_455751_kamer_1_number_1	emb|LN590705.1| Cyprinus carpio genome assembly common carp genome ,scaffold LG11	5.951977599	6.300220497	6.2059124	1.06582391	0	1.061398361	0.693147181	0.693147181	0	0	0.693147181	0	0	0	0	1.061910268	1.328400383	0	0.693147181	0.693147181	0.693147181	0	0	0	1.591326894	2.451229211	2.132496409	0	0	0	emb|LN590705.1| Cyprinus carpio genome assembly common carp genome ,scaffold LG11
File_R_cluster_1_biclust_result_1_bclustnum_456360_kamer_1_number_1	emb|LN590705.1| Cyprinus carpio genome assembly common carp genome ,scaffold LG11	6.189150794	6.555837573	6.324091902	1.086637543	1.098612289	0.693147181	0	0.693147181	0	0	0.693147181	0.693147181	0	0	0	0	1.275753785	0.693147181	0	0.693147181	0	0.693147181	1.098612289	0	3.436599917	2.770899797	3.257577172	0	0	0.88820808	emb|LN590705.1| Cyprinus carpio genome assembly common carp genome ,scaffold LG11
File_R_cluster_1_biclust_result_1_bclustnum_4593_kamer_1_number_1	emb|LN590674.1| Cyprinus carpio genome assembly common carp genome ,scaffold LG42	6.642468548	6.616083927	7.761715184	4.4125813	4.358903852	4.289871597	3.629580516	3.762775618	2.02060142	0	1.33875454	1.745465936	0	0	0	0.693147181	0	0	1.62813012	1.540445755	0.693147181	0	0	0.693147181	2.874248022	4.08236813	3.080597182	2.613527045	2.931599004	2.086558655	emb|LN590674.1| Cyprinus carpio genome assembly common carp genome ,scaffold LG42
File_R_cluster_1_biclust_result_1_bclustnum_460_kamer_1_number_1	emb|LN590674.1| Cyprinus carpio genome assembly common carp genome ,scaffold LG42	6.548105916	6.59884957	6.825917044	2.450056372	2.997755226	3.092255354	9.277812087	9.289040641	8.872011813	0	2.910016421	3.201001018	1.981001469	1.98006862	1.299283893	2.123591193	2.61698699	1.867744726	1.561064561	1.808288771	2.702662379	0	0.693147181	0.693147181	4.331084594	4.422688616	4.518159173	3.063264746	2.428971017	2.880085704	emb|LN590674.1| Cyprinus carpio genome assembly common carp genome ,scaffold LG42
File_R_cluster_1_biclust_result_1_bclustnum_460028_kamer_1_number_1	emb|LN590695.1| Cyprinus carpio genome assembly common carp genome ,scaffold LG23	6.757384613	6.632660322	6.776127217	3.131865902	2.705226217	3.069688806	1.905546383	2.138166714	2.243285093	0	1.897120485	1.890850372	0	0	0.693147181	0	0	0	1.282615764	0	1.272966076	0	0.693147181	0	2.364037607	3.142715903	2.456335693	2.946137536	2.931193752	2.662585501	emb|LN590695.1| Cyprinus carpio genome assembly common carp genome ,scaffold LG23
File_R_cluster_1_biclust_result_1_bclustnum_461127_kamer_1_number_1	emb|LN592867.1| Cyprinus carpio genome assembly common carp genome ,scaffold 000000006	6.506371332	6.417468939	6.505250285	5.080099166	4.880921368	4.720202776	4.010470078	3.883067821	3.962670491	2.531424393	3.078049316	2.693531987	0	0	0	1.098612289	1.62924054	0.693147181	1.508184507	1.935028299	2.108135893	0.693147181	0	0	4.876631409	4.806370741	4.719587564	4.223726734	4.330900432	4.551241844	emb|LN592867.1| Cyprinus carpio genome assembly common carp genome ,scaffold 000000006
File_R_cluster_1_biclust_result_1_bclustnum_461740_kamer_1_number_1	emb|LN590674.1| Cyprinus carpio genome assembly common carp genome ,scaffold LG42	5.997200565	6.155469372	6.264962752	1.258617227	1.504077397	2.207587364	1.426567405	1.347896509	0	0	1.206710055	0.693147181	0	0	0	0	0	0	1.098612289	0.693147181	0.693147181	0.693147181	0	1.078810861	1.879152024	2.622281688	1.322667424	1.098612289	1.377326772	0.693147181	emb|LN590674.1| Cyprinus carpio genome assembly common carp genome ,scaffold LG42
File_R_cluster_1_biclust_result_1_bclustnum_461941_kamer_1_number_1	emb|LN590674.1| Cyprinus carpio genome assembly common carp genome ,scaffold LG42	6.700662226	6.610266612	6.282061118	0.693147181	0.693147181	1.086637543	0	0.693147181	0.693147181	0	0	1.213784512	0	0.693147181	0.693147181	1.06686359	1.857274076	0	0	0	1.309920747	0	0	0	0.693147181	1.499370782	0.754599695	0.876713795	1.086637543	0	emb|LN590674.1| Cyprinus carpio genome assembly common carp genome ,scaffold LG42
File_R_cluster_1_biclust_result_1_bclustnum_465_kamer_1_number_1	emb|LN590674.1| Cyprinus carpio genome assembly common carp genome ,scaffold LG42	8.035654488	8.177667498	8.129089498	7.32612345	6.529036283	6.464555593	9.132064186	9.073950039	8.720746093	1.777773791	4.877103901	5.520908765	2.994481492	3.044522438	2.545531272	3.319625728	4.055962297	3.012677882	3.16835276	3.452200967	3.399258837	2.155427571	1.831367928	2.093234727	6.749617327	6.70623867	6.85641672	5.390878316	5.431973751	4.944153553	emb|LN590674.1| Cyprinus carpio genome assembly common carp genome ,scaffold LG42
File_R_cluster_1_biclust_result_1_bclustnum_467431_kamer_1_number_1	emb|LN590674.1| Cyprinus carpio genome assembly common carp genome ,scaffold LG42	6.105942126	5.930110284	6.197179092	3.510774993	2.824599884	3.107769947	2.508305743	2.156348183	2.353640309	0	2.603111819	2.306743435	0.693147181	0	0.693147181	1.029619417	1.071943141	0	0	0.996332209	1.056052674	0	0	0	3.052835408	3.682416112	3.522411561	2.108509932	1.751612594	1.511267045	emb|LN590674.1| Cyprinus carpio genome assembly common carp genome ,scaffold LG42
File_R_cluster_1_biclust_result_1_bclustnum_47_kamer_1_number_1	emb|LN590698.1| Cyprinus carpio genome assembly common carp genome ,scaffold LG17	0	0	0	0	0	0	0	0	0	9.252221006	0	0	0	0	0	0	0	0	0	0	0	0	0.693147181	0	0	0	0.693147181	0	0	0	emb|LN590698.1| Cyprinus carpio genome assembly common carp genome ,scaffold LG17
File_R_cluster_1_biclust_result_1_bclustnum_47038_kamer_1_number_1	emb|LN590698.1| Cyprinus carpio genome assembly common carp genome ,scaffold LG17	6.139487922	6.611333796	6.48377074	2.327277706	3.189500566	3.329851745	1.760576632	1.362997586	2.039167574	0	1.744611955	1.47740939	0.693147181	0	0	0	1.379513926	0	0.693147181	0.693147181	0.693147181	0	0	0	3.308910294	2.890371758	3.517809362	2.086989236	2.102206688	2.479332811	emb|LN590698.1| Cyprinus carpio genome assembly common carp genome ,scaffold LG17
File_R_cluster_1_biclust_result_1_bclustnum_471862_kamer_1_number_1	emb|LN598497.1| Cyprinus carpio genome assembly common carp genome ,scaffold 000002514	6.977840887	6.638891035	6.312988107	4.747615481	3.042167286	3.104972254	3.254767927	2.85760749	1.934716302	0	1.974081026	1.467298145	0.693147181	0	0	0.693147181	1.30173815	0	0	0	0.929195111	0	0	0	4.215322489	3.815675087	4.0867021	2.79979038	2.939489911	2.901064387	emb|LN598497.1| Cyprinus carpio genome assembly common carp genome ,scaffold 000002514
File_R_cluster_1_biclust_result_1_bclustnum_472687_kamer_1_number_1	emb|LN590674.1| Cyprinus carpio genome assembly common carp genome ,scaffold LG42	6.350246769	6.302721535	6.247170153	3.158497173	3.093598275	2.71553545	1.977595676	1.919404823	2.346437372	0	1.560365308	0.878983387	0	0.693147181	0.693147181	1.460401798	1.764886607	0.693147181	0	0	0.693147181	0	0.693147181	0	3.246105704	3.485780535	2.701455168	2.471373826	2.419603392	1.941877744	emb|LN590674.1| Cyprinus carpio genome assembly common carp genome ,scaffold LG42
File_R_cluster_1_biclust_result_1_bclustnum_47338_kamer_1_number_1	emb|LN590674.1| Cyprinus carpio genome assembly common carp genome ,scaffold LG42	6.15832342	6.363586568	6.391555239	2.023872012	1.787244291	1.496437173	1.470486142	1.21892841	0.860718824	0	1.938158756	2.136881097	0	0	0	0	0.693147181	1.880313545	0	0.888890758	0	0	0	0	2.492759072	2.682499887	2.745191831	0.693147181	1.059611551	1.266369972	emb|LN590674.1| Cyprinus carpio genome assembly common carp genome ,scaffold LG42
File_R_cluster_1_biclust_result_1_bclustnum_478904_kamer_1_number_1	emb|LN590705.1| Cyprinus carpio genome assembly common carp genome ,scaffold LG11	6.298371874	5.947959268	6.644718989	0.693147181	0.693147181	0.881405248	0	0	0	0	0.898998072	1.540445755	0	0	0	0.693147181	0.693147181	0	0	0.693147181	1.06686359	0	0	0	3.218875825	3.720516193	2.600004602	0.693147181	0	0	emb|LN590705.1| Cyprinus carpio genome assembly common carp genome ,scaffold LG11
File_R_cluster_1_biclust_result_1_bclustnum_48_kamer_1_number_1	emb|LN590674.1| Cyprinus carpio genome assembly common carp genome ,scaffold LG42	5.73347719	6.301983243	6.076336345	1.216395324	2.665490587	2.445966564	2.079441542	1.609437912	1.48223616	0	1.076870983	2.230612071	0	1.021652048	0	1.335001067	0	1.32175584	0.693147181	0	0.916290732	0	0	0	1.609437912	2.925250795	3.295836866	1.098612289	0	1.216395324	emb|LN590674.1| Cyprinus carpio genome assembly common carp genome ,scaffold LG42
File_R_cluster_1_biclust_result_1_bclustnum_484518_kamer_1_number_1	emb|LN598497.1| Cyprinus carpio genome assembly common carp genome ,scaffold 000002514	6.288042558	6.088595795	6.048655044	3.565380426	3.688879454	3.46112843	2.218502151	1.831367928	2.470917591	0	1.247825083	1.71041383	0	0	0	0	0	1.049821124	0	0	0.693147181	0	0	0	3.409803575	3.496880219	3.24663495	2.607618261	2.613527045	3.109926655	emb|LN598497.1| Cyprinus carpio genome assembly common carp genome ,scaffold 000002514
File_R_cluster_1_biclust_result_1_bclustnum_486752_kamer_1_number_1	emb|LN590677.1| Cyprinus carpio genome assembly common carp genome ,scaffold LG7	0	0	0	0	0	0	0	0	0.693147181	2.154273002	2.621482362	2.363828817	0	0.693147181	0	0	0	0	0.693147181	0	0	0	0	0	0	0	0	6.659505436	6.658711699	6.683618735	emb|LN590677.1| Cyprinus carpio genome assembly common carp genome ,scaffold LG7
File_R_cluster_1_biclust_result_1_bclustnum_487258_kamer_1_number_1	emb|LN590705.1| Cyprinus carpio genome assembly common carp genome ,scaffold LG11	6.439328007	6.390792528	6.486269015	3.33373548	1.815290432	2.077653694	2.182836001	2.114532344	0.898998072	0	2.746353827	2.269176179	0	0	0	0.693147181	0.693147181	0.693147181	0.693147181	1.232143265	0.693147181	0.693147181	0	0	4.202131133	3.765840495	4.346214207	0	0.693147181	0	emb|LN590705.1| Cyprinus carpio genome assembly common carp genome ,scaffold LG11
File_R_cluster_1_biclust_result_1_bclustnum_487842_kamer_1_number_1	emb|LN590705.1| Cyprinus carpio genome assembly common carp genome ,scaffold LG11	6.117394308	5.939110164	6.150425781	1.773741449	1.706027274	1.895393996	0.693147181	1.216395324	0	0	1.060872345	0.693147181	0.693147181	0	0	0	1.640527581	1.335001067	0.693147181	0	1.06686359	0	0	0	1.453434183	1.959703158	0.877882489	0.899197471	0.693147181	0	emb|LN590705.1| Cyprinus carpio genome assembly common carp genome ,scaffold LG11
File_R_cluster_1_biclust_result_1_bclustnum_489523_kamer_1_number_1	emb|LN590705.1| Cyprinus carpio genome assembly common carp genome ,scaffold LG11	7.313520342	7.385596861	6.229053263	3.239529071	3.559066852	3.155458808	2.875771243	2.423908521	1.505687211	0	2.889565878	2.333971351	1.589894172	2.138383572	2.121512756	2.314633222	3.110845081	2.614962217	1.233952877	1.998341296	2.392197252	2.684112637	2.279745238	2.217843865	4.320768062	4.26634779	3.875719952	1.338046425	0.934307452	1.990451845	emb|LN590705.1| Cyprinus carpio genome assembly common carp genome ,scaffold LG11
File_R_cluster_1_biclust_result_1_bclustnum_4897_kamer_1_number_1	emb|LN590674.1| Cyprinus carpio genome assembly common carp genome ,scaffold LG42	6.559557162	6.535280457	6.873419495	3.29532933	2.17063987	2.035689477	2.511937989	2.781963392	1.368275492	0	2.878119223	2.652664333	0	0	0	1.061910268	1.520606699	0	0.693147181	1.05977097	1.186003316	0.693147181	1.364633959	1.529885918	4.094116203	4.12226124	3.681660963	0.693147181	1.30425153	0.693147181	emb|LN590674.1| Cyprinus carpio genome assembly common carp genome ,scaffold LG42
File_R_cluster_1_biclust_result_1_bclustnum_489801_kamer_1_number_1	emb|LN591305.1| Cyprinus carpio genome assembly common carp genome ,scaffold 000001301	3.208970933	3.335306836	3.325974429	8.172650073	8.232551825	8.247327461	2.948247507	2.40184202	2.546949873	0	3.126633335	2.887099744	0	1.256837513	1.054649952	2.179140938	1.078202077	0.693147181	0.997000294	1.567909418	0.995427183	0	0	0	3.128539654	4.023796911	3.33220451	1.075353897	1.141783522	1.145791632	emb|LN591305.1| Cyprinus carpio genome assembly common carp genome ,scaffold 000001301
File_R_cluster_1_biclust_result_1_bclustnum_491_kamer_1_number_1	emb|LN590705.1| Cyprinus carpio genome assembly common carp genome ,scaffold LG11	6.882588229	6.915882166	7.118170163	2.077573548	2.301090977	2.06818467	2.099756293	2.079441542	0	0	2.994986996	2.80019173	0	0.693147181	0	1.36330461	1.590509903	0.693147181	1.098612289	1.254892129	0.693147181	1.088760586	0	0.693147181	3.198366948	3.057236508	2.966195321	1.098612289	0.907294386	0.693147181	emb|LN590705.1| Cyprinus carpio genome assembly common carp genome ,scaffold LG11
File_R_cluster_1_biclust_result_1_bclustnum_495238_kamer_1_number_1	emb|LN590674.1| Cyprinus carpio genome assembly common carp genome ,scaffold LG42	7.750834252	7.545543015	8.076232503	3.433987204	4.462660322	4.173203493	3.772172259	3.850966415	2.928111674	0	2.33704932	2.6528757	0	1.072637855	0.693147181	1.570387265	1.894616855	1.316866574	1.373221786	1.431905669	1.719785373	0	0	0	4.51254819	5.243713335	4.440991056	2.814000543	1.967928807	2.216971648	emb|LN590674.1| Cyprinus carpio genome assembly common carp genome ,scaffold LG42
File_R_cluster_1_biclust_result_1_bclustnum_496305_kamer_1_number_1	emb|LN595243.1| Cyprinus carpio genome assembly common carp genome ,scaffold 000012284	3.976369633	4.041160007	4.015966718	4.817171897	5.028023244	5.008065328	2.541846058	2.068217538	2.798463563	0	3.017043566	2.967559111	0.693147181	0.693147181	1.386294361	0.693147181	3.935137789	0	0.693147181	7.159579577	1.087440112	0	0	0	2.612331938	4.941642423	2.79540152	2.770693177	2.280679917	2.35357094	emb|LN595243.1| Cyprinus carpio genome assembly common carp genome ,scaffold 000012284
File_R_cluster_1_biclust_result_1_bclustnum_49695_kamer_1_number_1	emb|LN590674.1| Cyprinus carpio genome assembly common carp genome ,scaffold LG42	6.767635373	6.647358877	6.821813875	2.90590056	3.362057999	2.223851362	0.693147181	2.490640182	2.552043355	0	1.343123255	1.286396675	0	0	0.693147181	0	1.351925459	0	0.693147181	0.693147181	1.030626053	0.693147181	0	0	2.066862759	2.95696026	2.320729483	2.168651334	1.710789804	2.260325607	emb|LN590674.1| Cyprinus carpio genome assembly common carp genome ,scaffold LG42
File_R_cluster_1_biclust_result_1_bclustnum_49730_kamer_1_number_1	emb|LN590674.1| Cyprinus carpio genome assembly common carp genome ,scaffold LG42	5.832750136	5.774321705	6.015073646	2.303866272	3.349370612	3.230061037	1.587777	1.230540731	1.324051869	0	1.43018923	1.399898898	0	0	0	0	1.698929378	0	0.693147181	0.896744952	1.087052396	0	0.693147181	0	2.604584186	2.918462385	2.825193032	2.332143895	1.458933577	2.120263136	emb|LN590674.1| Cyprinus carpio genome assembly common carp genome ,scaffold LG42
File_R_cluster_1_biclust_result_1_bclustnum_499026_kamer_1_number_1	emb|LN590674.1| Cyprinus carpio genome assembly common carp genome ,scaffold LG42	6.715246407	6.612401185	6.26850899	0.693147181	1.189582763	0.693147181	0.893169484	1.054649952	0	0	1.087440112	1.104766645	0.693147181	0	0.693147181	1.048350042	1.263691604	1.974081026	0	0	0.693147181	0	0.693147181	0.693147181	0	0.904096686	0.693147181	0	0.693147181	0.879249083	emb|LN590674.1| Cyprinus carpio genome assembly common carp genome ,scaffold LG42
File_R_cluster_1_biclust_result_1_bclustnum_499406_kamer_1_number_1	emb|LN590713.1| Cyprinus carpio genome assembly common carp genome ,scaffold LG20	6.145579512	6.451357864	6.345724076	3.420614314	2.890371758	3.467571717	1.330995687	1.926071807	1.884978069	0	1.522944947	1.819158984	0	0	0	0	0.693147181	0	0.693147181	1.309920747	0.693147181	0	0	0	3.551053137	3.080188305	3.766129805	2.648533715	2.855728552	1.836573485	emb|LN590713.1| Cyprinus carpio genome assembly common carp genome ,scaffold LG20
File_R_cluster_1_biclust_result_1_bclustnum_499645_kamer_1_number_1	emb|LN590674.1| Cyprinus carpio genome assembly common carp genome ,scaffold LG42	6.860634321	6.770597892	6.809468574	1.086637543	1.53746489	1.016639108	0	0.870828823	0.693147181	0	1.578405345	1.756420678	0	0	0.693147181	0.693147181	1.643839339	1.079918646	0	0	0.899482258	0.693147181	0.693147181	0.693147181	1.843630597	2.73364647	1.73949026	0.693147181	0	0	emb|LN590674.1| Cyprinus carpio genome assembly common carp genome ,scaffold LG42
File_R_cluster_1_biclust_result_1_bclustnum_49972_kamer_1_number_1	emb|LN590713.1| Cyprinus carpio genome assembly common carp genome ,scaffold LG20	6.090714682	6.575130232	6.604354309	3.025587148	2.554774694	2.975799938	2.054460856	2.01665615	1.967324922	0	1.218343056	1.94402838	0	0	0	0.693147181	1.678430251	0	1.076138296	1.049162907	0	0	0	0	3.31131279	3.266160094	3.461614923	1.949663098	2.193746313	1.737692155	emb|LN590713.1| Cyprinus carpio genome assembly common carp genome ,scaffold LG20
File_R_cluster_1_biclust_result_1_bclustnum_50094_kamer_1_number_1	emb|LN590674.1| Cyprinus carpio genome assembly common carp genome ,scaffold LG42	6.729271947	7.135520136	6.781014492	2.472167517	2.27694313	3.412625168	1.401798548	1.511267045	2.341222944	0	2.420368129	2.088772869	0	0.693147181	0.693147181	1.309062283	1.518466706	0.693147181	0	0.869039783	1.078511617	0	0	0	2.144468225	2.269120342	1.987874348	2.455752432	1.544899391	2.438129458	emb|LN590674.1| Cyprinus carpio genome assembly common carp genome ,scaffold LG42
File_R_cluster_1_biclust_result_1_bclustnum_5013_kamer_1_number_1	emb|LN590674.1| Cyprinus carpio genome assembly common carp genome ,scaffold LG42	8.675235717	8.62550754	8.882166806	2.719240687	2.926505446	2.82862046	1.975162386	2.386018661	1.898417143	0	3.60068738	3.489397496	0.693147181	1.071943141	2.331432963	3.604818266	2.78192005	1.902107526	1.650155582	2.00007496	2.561095788	0	0	0	5.423459921	5.537334267	5.346116564	2.608922076	1.336365924	1.940255621	emb|LN590674.1| Cyprinus carpio genome assembly common carp genome ,scaffold LG42
File_R_cluster_1_biclust_result_1_bclustnum_50599_kamer_1_number_1	emb|LN590674.1| Cyprinus carpio genome assembly common carp genome ,scaffold LG42	5.925872137	6.004496758	5.998539461	2.267405484	3.272416592	2.954910279	1.866293184	0.693147181	1.979955405	0	1.6923258	1.872750957	0	0	0	0.693147181	0	0.693147181	1.056052674	0.693147181	0.693147181	0	0	0	2.237552583	1.540445755	2.063888721	1.556193242	2.023915618	2.489943941	emb|LN590674.1| Cyprinus carpio genome assembly common carp genome ,scaffold LG42
File_R_cluster_1_biclust_result_1_bclustnum_507735_kamer_1_number_1	emb|LN590769.1| Cyprinus carpio genome assembly common carp genome ,scaffold 000000192	0	0.693147181	0	0	0	0	0.693147181	0	0.83832919	6.890163446	0	0	0	0	0	0	0	0	0	0	0	0	0	1.098612289	0.693147181	1.098612289	0	0	0	0.693147181	emb|LN590769.1| Cyprinus carpio genome assembly common carp genome ,scaffold 000000192
File_R_cluster_1_biclust_result_1_bclustnum_509620_kamer_1_number_1	emb|LN596165.1| Cyprinus carpio genome assembly common carp genome ,scaffold 000004740	0	0	0	0	0	0	1.113878498	1.361291888	0.693147181	5.989958413	6.63983531	6.744273533	1.049821124	0.693147181	1.356079969	0.984853644	0.693147181	1.078511617	1.986141341	1.279610748	1.216395324	0.693147181	0.693147181	0	0	0	0	0	0	0.693147181	emb|LN596165.1| Cyprinus carpio genome assembly common carp genome ,scaffold 000004740
File_R_cluster_1_biclust_result_1_bclustnum_509646_kamer_1_number_1	emb|LN590698.1| Cyprinus carpio genome assembly common carp genome ,scaffold LG17	6.377588821	6.458361794	6.487752509	3.180538242	2.927806689	2.906004483	2.212039843	1.840313097	2.338595852	0	2.213671909	2.049135673	0	0.693147181	0.693147181	0	0	0	0	0.693147181	0.693147181	1.565634394	2.193248907	1.609437912	3.650853028	3.913216293	3.230745105	2.086876335	2.043350526	1.656094373	emb|LN590698.1| Cyprinus carpio genome assembly common carp genome ,scaffold LG17
File_R_cluster_1_biclust_result_1_bclustnum_5099_kamer_1_number_1	emb|LN590674.1| Cyprinus carpio genome assembly common carp genome ,scaffold LG42	7.794221653	7.94827931	7.957506401	2.530023409	2.763213663	2.861760784	1.438201092	2.460417558	1.352393672	0	2.707056374	2.618592197	1.609437912	1.014353484	2.197224577	2.090098306	2.610069793	2.101260517	0.896744952	2.128587595	1.077558879	0	0	0	2.173373499	2.389721046	2.27923765	2.309120689	1.516747897	1.635754571	emb|LN590674.1| Cyprinus carpio genome assembly common carp genome ,scaffold LG42
File_R_cluster_1_biclust_result_1_bclustnum_510695_kamer_1_number_1	emb|LN590674.1| Cyprinus carpio genome assembly common carp genome ,scaffold LG42	6.61047664	6.781951664	6.661775454	3.496128702	2.902108172	2.835446144	2.148850993	1.945910149	1.922120843	0	2.670694415	2.324835702	0	0	1.379692617	1.053151077	1.271225763	1.031920339	0.693147181	1.351314642	1.062408088	0	0	0	3.602776755	3.876136727	4.147490306	1.528770009	2.04867043	2.268683886	emb|LN590674.1| Cyprinus carpio genome assembly common carp genome ,scaffold LG42
File_R_cluster_1_biclust_result_1_bclustnum_516160_kamer_1_number_1	emb|LN590674.1| Cyprinus carpio genome assembly common carp genome ,scaffold LG42	7.019403982	6.588801298	7.283784711	2.817818986	4.029518	3.961679461	2.943069621	2.758692617	2.449659365	0	1.852638176	2.173866102	0.693147181	0.693147181	0	0	1.717651753	0	1.031603163	0.693147181	1.564277353	0	0	0	3.576278904	4.777811709	3.780936621	1.98769625	2.425068177	2.185612978	emb|LN590674.1| Cyprinus carpio genome assembly common carp genome ,scaffold LG42
File_R_cluster_1_biclust_result_1_bclustnum_51661_kamer_1_number_1	emb|LN590674.1| Cyprinus carpio genome assembly common carp genome ,scaffold LG42	7.539207891	7.421925304	6.562617807	2.561389181	3.503477157	3.169685581	1.948104882	1.555712188	1.928170877	0	1.21010894	0.881856625	0	0	0	0	0	0	0	0.693147181	1.067358952	0	0	0	2.710101429	2.751205471	3.071266371	2.010449117	2.117181592	2.210807466	emb|LN590674.1| Cyprinus carpio genome assembly common carp genome ,scaffold LG42
File_R_cluster_1_biclust_result_1_bclustnum_5177_kamer_1_number_1	emb|LN590674.1| Cyprinus carpio genome assembly common carp genome ,scaffold LG42	7.682238177	7.800355596	6.772663813	3.733692673	3.503371827	3.368340112	2.637971026	3.06098148	2.916948773	0	3.177420296	4.597259983	0.693147181	1.098612289	1.098612289	0	0.693147181	0	0	0.693147181	1.351609744	0.693147181	0	0.693147181	3.627971667	4.537474687	3.161505153	3.201143533	2.85611957	2.439708776	emb|LN590674.1| Cyprinus carpio genome assembly common carp genome ,scaffold LG42
File_R_cluster_1_biclust_result_1_bclustnum_518020_kamer_1_number_1	emb|LN590705.1| Cyprinus carpio genome assembly common carp genome ,scaffold LG11	6.666811744	7.479389978	7.171633781	1.811052163	3.316713716	3.29113695	2.032469162	2.205628058	2.943770335	0	2.224965115	2.251957893	0	0	0.693147181	0	1.266276956	1.30833282	0.693147181	0.693147181	0.693147181	0	0	0.693147181	3.600946744	4.691696445	4.40486509	1.229947521	0.693147181	1.01523068	emb|LN590705.1| Cyprinus carpio genome assembly common carp genome ,scaffold LG11
File_R_cluster_1_biclust_result_1_bclustnum_52000_kamer_1_number_1	emb|LN590705.1| Cyprinus carpio genome assembly common carp genome ,scaffold LG11	5.98916691	6.09155872	6.340553288	0.693147181	1.641785057	1.393215356	0.868595168	1.089309148	1.773741449	0	1.768663124	1.836409328	0.974050076	0.693147181	0	0.693147181	0	1.06686359	0	0	0.8766264	0.693147181	0.693147181	0.693147181	2.941550601	3.007986878	3.082286046	1.098612289	0	1.086637543	emb|LN590705.1| Cyprinus carpio genome assembly common carp genome ,scaffold LG11
File_R_cluster_1_biclust_result_1_bclustnum_521311_kamer_1_number_1	emb|LN590674.1| Cyprinus carpio genome assembly common carp genome ,scaffold LG42	6.253261343	6.008781244	6.700809827	3.712136891	3.550292446	2.603718785	2.733529496	2.08494139	2.501919441	0	1.634473881	0.888315036	0	0	1.353716932	0	1.593521922	0.693147181	0	0	1.242652025	0	0	0	3.024169087	4.066832896	3.235154604	2.831311537	2.161086043	2.245938548	emb|LN590674.1| Cyprinus carpio genome assembly common carp genome ,scaffold LG42
File_R_cluster_1_biclust_result_1_bclustnum_5279_kamer_1_number_1	emb|LN590674.1| Cyprinus carpio genome assembly common carp genome ,scaffold LG42	5.836476016	5.563842016	6.08221891	3.52561613	3.131634603	2.96683885	2.177337013	1.967378056	2.650512892	0	0.931557598	1.687335552	0	1.077558879	0	0	1.019832394	1.062895297	0.693147181	0.856651125	0	0	0	0	3.130529739	3.550998616	2.835446144	2.19581692	3.072693315	2.751537441	emb|LN590674.1| Cyprinus carpio genome assembly common carp genome ,scaffold LG42
File_R_cluster_1_biclust_result_1_bclustnum_531848_kamer_1_number_1	emb|LN591305.1| Cyprinus carpio genome assembly common carp genome ,scaffold 000001301	5.402411581	5.599240143	5.541953503	2.770749532	3.095043529	3.14693719	2.696213759	2.974176611	2.970414466	0	1.33731943	2.379001541	0.693147181	1.361804415	0.693147181	2.557227311	1.996554376	1.764509882	1.555042971	1.658228077	1.029619417	0	0	0	3.760858197	4.189877444	3.731347293	7.069151078	7.052885396	6.98835783	emb|LN591305.1| Cyprinus carpio genome assembly common carp genome ,scaffold 000001301
File_R_cluster_1_biclust_result_1_bclustnum_5324_kamer_1_number_1	emb|LN590713.1| Cyprinus carpio genome assembly common carp genome ,scaffold LG20	6.91109968	7.122269706	5.930120917	3.144152279	3.568447601	3.5085559	2.235788023	2.709076341	1.692080929	0	2.00148	1.851478583	0	0	0	0	0	0	1.214684232	0.693147181	0.926407386	0	0	0	2.482336684	3.690415773	1.986820368	2.253718326	2.54099551	2.31024766	emb|LN590713.1| Cyprinus carpio genome assembly common carp genome ,scaffold LG20
File_R_cluster_1_biclust_result_1_bclustnum_53743_kamer_1_number_1	emb|LN590705.1| Cyprinus carpio genome assembly common carp genome ,scaffold LG11	6.91262341	6.94471382	7.003201813	2.890371758	4.603168183	4.671556998	2.914023178	2.708050201	2.885230788	0	2.737363018	2.120878547	0.693147181	0	0	1.775499659	2.444761509	1.353505122	0	0.693147181	1.045123604	0.693147181	0	0	3.76797479	3.900262117	3.799111833	0.693147181	0.693147181	0	emb|LN590705.1| Cyprinus carpio genome assembly common carp genome ,scaffold LG11
File_R_cluster_1_biclust_result_1_bclustnum_539533_kamer_1_number_1	emb|LN590705.1| Cyprinus carpio genome assembly common carp genome ,scaffold LG11	5.909823271	6.293585624	6.137312281	1.544899391	1.785790021	1.005520646	0.693147181	1.098612289	0.693147181	0	1.30833282	1.053761356	0	0	0.693147181	0	0	1.088760586	0	0	0.693147181	0	0	0	1.676376676	2.664376923	2.523678544	0.693147181	1.386294361	1.756667554	emb|LN590705.1| Cyprinus carpio genome assembly common carp genome ,scaffold LG11
File_R_cluster_1_biclust_result_1_bclustnum_539653_kamer_1_number_1	emb|LN590698.1| Cyprinus carpio genome assembly common carp genome ,scaffold LG17	0	0	0	0	0	0	0	0	0	8.025470604	0	0	0	0	0	0	0	0	0	0	0	0	0	0	0	0	0.693147181	0	0	0	emb|LN590698.1| Cyprinus carpio genome assembly common carp genome ,scaffold LG17
File_R_cluster_1_biclust_result_1_bclustnum_53998_kamer_1_number_1	emb|LN590674.1| Cyprinus carpio genome assembly common carp genome ,scaffold LG42	7.019663313	6.809775238	7.532072075	2.360608688	2.318048909	2.241800583	1.475172536	1.219847138	1.489349471	0	2.234964494	2.066538656	0.693147181	0.693147181	1.081371178	2.019769825	2.199746949	1.354545663	0.936375672	1.241713577	1.073294481	0	0	0	4.338798101	5.250192731	3.669133275	2.23112561	1.744507122	1.313172441	emb|LN590674.1| Cyprinus carpio genome assembly common carp genome ,scaffold LG42
File_R_cluster_1_biclust_result_1_bclustnum_540136_kamer_1_number_1	emb|LN593682.1| Cyprinus carpio genome assembly common carp genome ,scaffold 000000701	6.059496957	6.022357411	6.151668299	5.217871661	5.671062983	6.106131622	4.668144985	4.239840757	4.735004754	2.815989389	3.471578178	3.247634307	0	0	0	0	0.693147181	0.693147181	2.245736396	1.867043179	2.40422068	0	0	0	4.422144782	4.34799016	4.580920525	4.987462193	4.949057718	4.967651242	emb|LN593682.1| Cyprinus carpio genome assembly common carp genome ,scaffold 000000701
File_R_cluster_1_biclust_result_1_bclustnum_540225_kamer_1_number_1	emb|LN590674.1| Cyprinus carpio genome assembly common carp genome ,scaffold LG42	6.059123196	6.074780354	6.193458004	3.043440901	2.678635122	3.122232757	1.890199594	1.691675748	1.777031544	0	0.693147181	1.205665371	0	0	0.693147181	0	0	0	1.068757709	1.583293096	0.892276689	0	0	0	2.595657611	2.226552501	1.877360547	1.778226646	2.216363586	1.881786018	emb|LN590674.1| Cyprinus carpio genome assembly common carp genome ,scaffold LG42
File_R_cluster_1_biclust_result_1_bclustnum_540834_kamer_1_number_1	emb|LN590767.1| Cyprinus carpio genome assembly common carp genome ,scaffold 000000187	6.17324429	6.385449004	6.116428406	1.21892841	1.015433558	1.107704165	1.098612289	0	0	0	1.730564685	1.231002197	0	0.693147181	1.037987875	1.309062283	1.068757709	0.693147181	1.364633959	0	0.693147181	0	0.693147181	0	1.747412171	1.075517649	2.244782236	1.054649952	0.693147181	0.693147181	emb|LN590767.1| Cyprinus carpio genome assembly common carp genome ,scaffold 000000187
File_R_cluster_1_biclust_result_1_bclustnum_54320_kamer_1_number_1	emb|LN590713.1| Cyprinus carpio genome assembly common carp genome ,scaffold LG20	6.153577019	6.439219372	6.20765196	2.759661778	2.604207052	3.223863366	1.561064561	2.004806892	1.594513089	0	1.742626996	1.754545541	0	0	0	0	0	1.098612289	0	1.351446672	1.027660357	1.088760586	0	0	2.353330487	3.105877325	2.784504941	2.344133863	1.546481073	2.138035869	emb|LN590713.1| Cyprinus carpio genome assembly common carp genome ,scaffold LG20
File_R_cluster_1_biclust_result_1_bclustnum_543518_kamer_1_number_1	emb|LN590713.1| Cyprinus carpio genome assembly common carp genome ,scaffold LG20	6.726862701	7.314532859	7.018768786	2.907256188	3.426367929	3.665820631	1.584120104	2.328063738	2.111189693	0	2.084176564	1.666908389	0	0	0.693147181	0	1.346021695	0.955511445	1.020524613	0	1.076870983	0	0	0	2.673286209	2.470215934	3.229321083	1.972343406	2.271677331	2.668907352	emb|LN590713.1| Cyprinus carpio genome assembly common carp genome ,scaffold LG20
File_R_cluster_1_biclust_result_1_bclustnum_543563_kamer_1_number_1	emb|LN590705.1| Cyprinus carpio genome assembly common carp genome ,scaffold LG11	9.011145254	9.023221326	9.060514659	1.945910149	2.795865699	2.811671205	2.395256339	2.404464557	1.941760121	0	5.088490997	5.213516272	0	1.386294361	1.910664838	3.183091122	3.631374804	2.367123927	1.349389165	2.232038157	2.142620545	0.693147181	0	1.057370067	3.073096011	3.049339389	3.568103507	2.079441542	1.762346106	0.901692697	emb|LN590705.1| Cyprinus carpio genome assembly common carp genome ,scaffold LG11
File_R_cluster_1_biclust_result_1_bclustnum_544869_kamer_1_number_1	emb|LN590674.1| Cyprinus carpio genome assembly common carp genome ,scaffold LG42	6.960167447	7.096423321	7.506751108	1.386294361	1.488525987	1.777773791	2.075962999	1.595452572	0	0	2.003730169	1.504077397	0	0	0.693147181	1.755057448	1.809617396	0	0.91071924	1.080913247	1.256837513	1.049821124	0	1.080431346	2.451961537	2.380060816	2.003730169	0.693147181	0.693147181	0	emb|LN590674.1| Cyprinus carpio genome assembly common carp genome ,scaffold LG42
File_R_cluster_1_biclust_result_1_bclustnum_54507_kamer_1_number_1	emb|LN590674.1| Cyprinus carpio genome assembly common carp genome ,scaffold LG42	5.830538466	5.926026955	9.039664737	3.039217917	4.083452121	4.244218969	2.982682494	2.865982294	3.013523075	0	2.318704475	2.438382666	2.578662592	1.913649615	1.887866301	2.388177297	3.91949502	3.173413916	1.750374816	1.339773869	1.012843775	1.464072198	1.317300597	0.693147181	3.593925711	5.36405829	3.657675124	2.081106405	2.063910304	2.407809599	emb|LN590674.1| Cyprinus carpio genome assembly common carp genome ,scaffold LG42
File_R_cluster_1_biclust_result_1_bclustnum_552385_kamer_1_number_1	emb|LN590674.1| Cyprinus carpio genome assembly common carp genome ,scaffold LG42	6.691551343	6.393677707	6.367540322	3.0519141	3.334519685	3.453074839	2.594859106	2.211551456	1.571900102	0	2.885308964	2.827851939	0	0	0.693147181	2.031432322	1.053761356	1.333650155	0	0	0.693147181	0	0	0	4.01439185	3.871471808	3.769320544	2.385700306	2.100061237	2.482378457	emb|LN590674.1| Cyprinus carpio genome assembly common carp genome ,scaffold LG42
File_R_cluster_1_biclust_result_1_bclustnum_554_kamer_1_number_1	emb|LN590674.1| Cyprinus carpio genome assembly common carp genome ,scaffold LG42	7.392154789	7.491701244	7.061608772	5.676322202	5.639606554	5.658408469	4.778913387	4.536424427	4.633660456	1.098612289	3.537733838	3.724840051	0.693147181	0	1.063520374	1.311705504	1.800402015	1.518354985	1.935328648	2.133167126	2.267078115	2.242766084	1.62201647	1.470175845	4.74427104	5.100457716	4.517070945	4.925701757	4.821144097	4.660727875	emb|LN590674.1| Cyprinus carpio genome assembly common carp genome ,scaffold LG42
File_R_cluster_1_biclust_result_1_bclustnum_55403_kamer_1_number_1	emb|LN590705.1| Cyprinus carpio genome assembly common carp genome ,scaffold LG11	5.918382971	6.350112294	6.273259952	2.280923158	1.779783037	1.876916767	0.693147181	1.155521783	1.098612289	0	1.019363432	0.693147181	0.693147181	0.693147181	0.693147181	1.048602381	0.693147181	0.693147181	1.087440112	0	0	0	0.693147181	0	1.654558495	2.866892714	2.763850656	0.991843374	0.693147181	0.693147181	emb|LN590705.1| Cyprinus carpio genome assembly common carp genome ,scaffold LG11
File_R_cluster_1_biclust_result_1_bclustnum_55583_kamer_1_number_1	emb|LN590674.1| Cyprinus carpio genome assembly common carp genome ,scaffold LG42	6.191973866	6.729158377	6.540939086	2.180202747	2.258593497	2.00216355	0.693147181	1.202705001	1.00063188	0	1.570724111	1.456552432	0.980830503	0	0	0.693147181	0	0	0	0.693147181	0.693147181	0	0.693147181	0	3.097923272	2.739613466	3.995759191	1.086637543	0.896744952	1.945910149	emb|LN590674.1| Cyprinus carpio genome assembly common carp genome ,scaffold LG42
File_R_cluster_1_biclust_result_1_bclustnum_5579_kamer_1_number_1	emb|LN590674.1| Cyprinus carpio genome assembly common carp genome ,scaffold LG42	5.998936562	5.923819874	6.023750211	3.251664357	2.49587956	2.265661739	1.745849902	2.136137279	2.21557408	0	2.554316101	2.494237977	0	0	0.693147181	0	1.386294361	0.693147181	1.088140989	0.693147181	0.693147181	0	0	0	1.484441422	2.111727205	1.869877248	1.960835355	1.467298145	2.678738102	emb|LN590674.1| Cyprinus carpio genome assembly common carp genome ,scaffold LG42
File_R_cluster_1_biclust_result_1_bclustnum_55885_kamer_1_number_1	emb|LN590674.1| Cyprinus carpio genome assembly common carp genome ,scaffold LG42	7.559981502	7.793013443	6.791644969	3.503958522	3.752902999	3.543243669	3.044522438	3.042663568	3.388125651	0	2.604133088	2.746270414	1.723848156	2.216971648	1.99242971	2.410802524	2.928881748	1.955264829	1.207245443	1.278739774	1.770098216	3.512825217	3.792178096	3.701951146	3.706898629	3.537754193	3.151735522	2.95801483	2.403859271	2.069653798	emb|LN590674.1| Cyprinus carpio genome assembly common carp genome ,scaffold LG42
File_R_cluster_1_biclust_result_1_bclustnum_56_kamer_1_number_1	emb|LN590674.1| Cyprinus carpio genome assembly common carp genome ,scaffold LG42	6.311482509	6.350061643	6.463679791	3.151667075	2.916266899	3.189562353	2.1690537	2.115251396	2.047692843	0	1.686913636	1.890850372	0	0.693147181	0	1.325670833	0	0.693147181	1.049821124	1.057370067	0.693147181	0	0.693147181	0	3.431745985	3.129436776	3.954710778	2.412936135	1.819158984	2.030866917	emb|LN590674.1| Cyprinus carpio genome assembly common carp genome ,scaffold LG42
File_R_cluster_1_biclust_result_1_bclustnum_561668_kamer_1_number_1	emb|LN592465.1| Cyprinus carpio genome assembly common carp genome ,scaffold 000002368	0.693147181	0	0	0	0.693147181	0	0	0	0	6.93951554	0	0	0	0	0	0	0	0	0	0	0	0	0	0	0	0.693147181	0	0	0	0	emb|LN592465.1| Cyprinus carpio genome assembly common carp genome ,scaffold 000002368
File_R_cluster_1_biclust_result_1_bclustnum_563123_kamer_1_number_1	emb|LN590676.1| Cyprinus carpio genome assembly common carp genome ,scaffold LG34	5.618090227	5.661702745	5.706987334	5.371270386	5.378550825	5.282355653	4.691118498	4.59398284	4.556350671	1.17657283	3.203437261	3.211790785	1.232143265	1.773476686	0.963792447	2.042586927	2.122760815	1.625632076	2.04520847	1.576009352	2.029514419	1.06686359	0.693147181	0.693147181	8.622300675	8.663303635	8.700887139	4.432163511	4.684544978	4.651395158	emb|LN590676.1| Cyprinus carpio genome assembly common carp genome ,scaffold LG34
File_R_cluster_1_biclust_result_1_bclustnum_5636_kamer_1_number_1	emb|LN590674.1| Cyprinus carpio genome assembly common carp genome ,scaffold LG42	6.189023588	6.151945151	5.997312415	2.726682209	3.639229545	3.689614184	2.625986564	2.130532628	2.329797455	0	1.143980732	1.291346116	0.693147181	0	0	0.693147181	0	0.693147181	0	0.693147181	0.693147181	0	0	0	3.127409448	3.517607624	3.456821285	2.821027634	2.671849457	2.528077883	emb|LN590674.1| Cyprinus carpio genome assembly common carp genome ,scaffold LG42
File_R_cluster_1_biclust_result_1_bclustnum_564840_kamer_1_number_1	emb|LN590674.1| Cyprinus carpio genome assembly common carp genome ,scaffold LG42	6.135125401	6.43078665	6.16325796	3.556270493	3.660541706	3.561213682	2.477529505	2.477529505	2.385700306	0	1.417492595	1.420901081	0	0.693147181	0	0.693147181	1.048350042	0	0	0	0.693147181	0	0	0.693147181	2.421851472	2.12080419	2.600687683	2.452116549	3.013748993	2.608642304	emb|LN590674.1| Cyprinus carpio genome assembly common carp genome ,scaffold LG42
File_R_cluster_1_biclust_result_1_bclustnum_565257_kamer_1_number_1	emb|LN590674.1| Cyprinus carpio genome assembly common carp genome ,scaffold LG42	6.657595042	6.807083753	7.187967018	1.582037938	1.304948722	2.061422673	1.473586115	1.341380674	1.054649952	0	1.448508308	1.573669792	0	0	0.693147181	1.740939747	0.9777771	0.693147181	1.077558879	0.693147181	0.693147181	0	0	0	1.548136812	2.309319367	1.358894901	1.368275492	1.309062283	1.681758574	emb|LN590674.1| Cyprinus carpio genome assembly common carp genome ,scaffold LG42
File_R_cluster_1_biclust_result_1_bclustnum_56691_kamer_1_number_1	emb|LN590674.1| Cyprinus carpio genome assembly common carp genome ,scaffold LG42	6.708710261	7.152096562	6.758965205	1.871802177	1.051359941	1.147402453	1.486836286	1.045123604	1.098612289	0	1.353716932	1.802122256	0	0.693147181	0	1.09044906	0.693147181	0	0	0	0.693147181	0	0	0	1.673975809	2.088772869	1.753538256	1.086637543	0	0.900291423	emb|LN590674.1| Cyprinus carpio genome assembly common carp genome ,scaffold LG42
File_R_cluster_1_biclust_result_1_bclustnum_569567_kamer_1_number_1	emb|LN590674.1| Cyprinus carpio genome assembly common carp genome ,scaffold LG42	6.847599672	7.337366509	7.06660348	0.693147181	0.997144188	1.569958766	0.693147181	1.098612289	0	0	3.201355232	3.608783203	0	0.693147181	0	0.693147181	1.722766598	0.693147181	0	0.693147181	0.693147181	0	0	0	2.323419541	2.135411819	2.657682794	1.186720841	0.856651125	1.319604194	emb|LN590674.1| Cyprinus carpio genome assembly common carp genome ,scaffold LG42
File_R_cluster_1_biclust_result_1_bclustnum_570931_kamer_1_number_1	emb|LN590674.1| Cyprinus carpio genome assembly common carp genome ,scaffold LG42	6.338869659	6.238121479	6.265202349	4.159289251	4.862730623	4.930913646	3.096929635	3.566050585	2.170906839	0	2.826313122	2.871432425	0	0	0	1.529394205	1.6930251	1.349023346	1.011600912	0.693147181	1.303064915	0	0	0.693147181	4.951889739	5.348530328	4.438823942	1.580449787	1.726932907	1.900361226	emb|LN590674.1| Cyprinus carpio genome assembly common carp genome ,scaffold LG42
File_R_cluster_1_biclust_result_1_bclustnum_572_kamer_1_number_1	emb|LN590674.1| Cyprinus carpio genome assembly common carp genome ,scaffold LG42	6.616777114	7.412498442	7.025831605	3.012053357	3.511357361	3.879865449	2.189789226	2.69758227	1.527704944	0	3.013920854	2.851659804	0	0	0	0	1.83982715	1.09002889	0.87007924	0	0.875468737	0	0	0	3.747268638	3.494587538	4.957607162	3.168600959	2.288978948	2.126994035	emb|LN590674.1| Cyprinus carpio genome assembly common carp genome ,scaffold LG42
File_R_cluster_1_biclust_result_1_bclustnum_577143_kamer_1_number_1	emb|LN590713.1| Cyprinus carpio genome assembly common carp genome ,scaffold LG20	6.596369139	6.556995662	6.720287704	3.546379392	2.63905733	2.840644488	1.617852411	1.885788526	1.921469612	0	1.393312179	1.152680563	0	0	0.693147181	0	0.991190391	0	0.693147181	0.693147181	0.693147181	0	0	0	2.270181729	2.491824334	2.311000583	2.491501522	3.046059351	2.107276772	emb|LN590713.1| Cyprinus carpio genome assembly common carp genome ,scaffold LG20
File_R_cluster_1_biclust_result_1_bclustnum_582134_kamer_1_number_1	emb|LN590674.1| Cyprinus carpio genome assembly common carp genome ,scaffold LG42	5.963754136	6.156033624	6.200892468	1.71041383	1.579257017	1.556720447	1.568615918	1.201265142	1.098612289	0	1.719382306	0.899941814	0	0.693147181	0	1.386294361	1.047318994	0.693147181	0	0	0.693147181	0	0	0	1.220502434	2.203212171	1.448508308	0.866419584	0.693147181	0.693147181	emb|LN590674.1| Cyprinus carpio genome assembly common carp genome ,scaffold LG42
File_R_cluster_1_biclust_result_1_bclustnum_587466_kamer_1_number_1	emb|LN590674.1| Cyprinus carpio genome assembly common carp genome ,scaffold LG42	6.096407726	6.334988647	6.468695124	2.614962217	3.174961554	3.11240358	2.215119067	2.16142928	1.212684745	0	1.093837575	1.878427871	0	0	0	0.693147181	0.999520969	1.068757709	0.693147181	0.693147181	1.080180122	0	0	0	3.204951327	3.877354953	3.335285473	2.980918083	2.12233938	2.694160856	emb|LN590674.1| Cyprinus carpio genome assembly common carp genome ,scaffold LG42
File_R_cluster_1_biclust_result_1_bclustnum_588_kamer_1_number_1	emb|LN590674.1| Cyprinus carpio genome assembly common carp genome ,scaffold LG42	5.726534995	5.97168012	6.174127712	3.058129441	3.265446385	2.970763123	1.870747775	1.834223315	1.773325605	0	1.242929059	2.062169485	0.693147181	0	0	0	1.314320264	0	0	0.693147181	0	0	0	0	2.942273478	2.496258638	2.783658476	1.753732177	2.251291799	2.005973941	emb|LN590674.1| Cyprinus carpio genome assembly common carp genome ,scaffold LG42
File_R_cluster_1_biclust_result_1_bclustnum_591521_kamer_1_number_1	emb|LN590674.1| Cyprinus carpio genome assembly common carp genome ,scaffold LG42	5.952687336	6.052627847	5.955059865	3.148453361	3.100736226	3.419597065	1.962105437	1.76031868	2.753660712	0	1.691675748	1.484847006	0	0	0	0	0.693147181	0	0.91289698	0	1.060872345	1.041452698	0	1.086637543	2.725981798	3.036327042	2.953419585	2.10587532	2.488998268	2.852629507	emb|LN590674.1| Cyprinus carpio genome assembly common carp genome ,scaffold LG42
File_R_cluster_1_biclust_result_1_bclustnum_59595_kamer_1_number_1	emb|LN590698.1| Cyprinus carpio genome assembly common carp genome ,scaffold LG17	6.431089507	6.59138288	6.66057515	3.529663886	3.636269504	3.49726485	2.510615006	2.879900458	2.301334311	0	3.166002335	3.10514706	0	0	0	1.088760586	0.693147181	0.693147181	1.051545139	0.693147181	0.864997437	0	0	0	3.279029748	3.606176962	4.019980147	2.074743021	2.515678308	2.641361815	emb|LN590698.1| Cyprinus carpio genome assembly common carp genome ,scaffold LG17
File_R_cluster_1_biclust_result_1_bclustnum_59641_kamer_1_number_1	emb|LN590713.1| Cyprinus carpio genome assembly common carp genome ,scaffold LG20	6.581312974	6.619802503	6.781517225	2.452865436	3.259261244	2.530047305	1.365816106	1.878019731	2.142092345	0	1.41706602	1.482833331	0	0.693147181	0	0	0	0	1.053151077	0.693147181	0	0	0	0	2.344919224	1.882143901	2.288978948	1.99432201	2.448536536	1.902368686	emb|LN590713.1| Cyprinus carpio genome assembly common carp genome ,scaffold LG20
File_R_cluster_1_biclust_result_1_bclustnum_5975_kamer_1_number_1	emb|LN590767.1| Cyprinus carpio genome assembly common carp genome ,scaffold 000000187	6.170098061	6.444457118	6.143066983	2.743044045	2.562839441	2.898709127	1.738650492	1.47786118	2.04867043	0	1.560497637	1.484092353	0	0	0	0.693147181	0	0	1.032764466	0.897360684	1.016935747	0	0	0	2.648795474	2.613285206	1.991807698	1.91481893	2.341805806	2.162974689	emb|LN590767.1| Cyprinus carpio genome assembly common carp genome ,scaffold 000000187
File_R_cluster_1_biclust_result_1_bclustnum_601880_kamer_1_number_1	emb|LN590705.1| Cyprinus carpio genome assembly common carp genome ,scaffold LG11	6.505456652	6.541899751	6.740422428	1.075752995	1.588530876	1.66579178	0.693147181	0.693147181	1.386294361	0	1.742626996	1.077885635	0	0	0	1.30173815	0	0.693147181	0	0	1.086637543	0	0	0.693147181	1.47786118	1.652922599	1.064210612	1.581464273	1.368275492	1.773741449	emb|LN590705.1| Cyprinus carpio genome assembly common carp genome ,scaffold LG11
File_R_cluster_1_biclust_result_1_bclustnum_6023_kamer_1_number_1	emb|LN590705.1| Cyprinus carpio genome assembly common carp genome ,scaffold LG11	6.124683391	6.568256266	6.108487294	2.723122705	2.714780833	2.298780866	1.617003223	1.200118386	0.94867273	0	1.837127913	2.720630733	0	0	0	0	0.693147181	1.054935529	0	0	0	0	0	0	3.450990218	3.366857803	4.266594739	1.587777	1.900563051	0	emb|LN590705.1| Cyprinus carpio genome assembly common carp genome ,scaffold LG11
File_R_cluster_1_biclust_result_1_bclustnum_602625_kamer_1_number_1	emb|LN590705.1| Cyprinus carpio genome assembly common carp genome ,scaffold LG11	5.762095407	6.171094986	5.728875007	1.515285462	2.311243501	1.798980005	1.825016925	1.687472451	1.784486418	0	1.218860432	1.045967204	1.353505122	1.721649903	1.06582391	1.098612289	2.909564177	1.583293096	0.693147181	1.074514249	0.897360684	0	0.693147181	0.693147181	2.854301189	2.916597071	3.013685152	1.098612289	0.693147181	1.023389336	emb|LN590705.1| Cyprinus carpio genome assembly common carp genome ,scaffold LG11
File_R_cluster_1_biclust_result_1_bclustnum_60446_kamer_1_number_1	emb|LN590705.1| Cyprinus carpio genome assembly common carp genome ,scaffold LG11	6.626177206	7.096688265	6.749885525	0	0	0.693147181	0	0	0	0	1.079918646	0	0	0	0.693147181	0	0	0	0	0.693147181	0.693147181	0	0	0	0	1.577350576	1.446918983	0	0	0	emb|LN590705.1| Cyprinus carpio genome assembly common carp genome ,scaffold LG11
File_R_cluster_1_biclust_result_1_bclustnum_60732_kamer_1_number_1	emb|LN590713.1| Cyprinus carpio genome assembly common carp genome ,scaffold LG20	5.9813334	6.16101321	6.108971989	5.459283341	5.334649296	5.675928119	5.008412826	4.964556451	4.734618253	3.44349988	3.5960073	3.284408851	0.693147181	0	0	0.693147181	0.693147181	0.693147181	2.397895273	1.551007631	2.589048924	0.693147181	0	0	4.61126259	4.613338732	4.680166335	5.362249454	4.720960126	5.308935791	emb|LN590713.1| Cyprinus carpio genome assembly common carp genome ,scaffold LG20
File_R_cluster_1_biclust_result_1_bclustnum_607464_kamer_1_number_1	emb|LN590674.1| Cyprinus carpio genome assembly common carp genome ,scaffold LG42	6.856618814	6.813013737	6.896270582	2.506080885	2.43645143	2.835111541	1.762042254	2.027436152	2.247777209	0	1.659514867	1.955516715	0	0	0	0.693147181	1.38096016	0.693147181	0	1.362577835	0.693147181	0.693147181	0	0	2.206193128	2.650576443	2.251291799	1.853725935	2.692374646	2.449331284	emb|LN590674.1| Cyprinus carpio genome assembly common carp genome ,scaffold LG42
File_R_cluster_1_biclust_result_1_bclustnum_608511_kamer_1_number_1	emb|LN590713.1| Cyprinus carpio genome assembly common carp genome ,scaffold LG20	6.317402926	6.058779679	6.160058983	2.846309566	2.748398483	2.718779107	1.918218831	1.316089148	1.741497222	0	1.317825459	0.693147181	0	0.693147181	0.693147181	1.575535671	2.088546218	1.345136373	0.901903734	0.902402739	0	0	0	0	2.448718002	2.914587292	2.221439027	2.436897431	1.839615864	2.254382806	emb|LN590713.1| Cyprinus carpio genome assembly common carp genome ,scaffold LG20
File_R_cluster_1_biclust_result_1_bclustnum_60872_kamer_1_number_1	emb|LN590674.1| Cyprinus carpio genome assembly common carp genome ,scaffold LG42	6.724369556	7.227335648	6.935059114	3.118219781	3.2253071	2.149948932	2.135856137	1.890199594	1.712977772	0.693147181	1.15946904	1.777939411	1.016374952	0	0	0.693147181	0.693147181	0.693147181	0	0	1.047080369	0	0	0	2.403226491	2.181413573	3.010330203	2.1690537	1.885513894	2.391815922	emb|LN590674.1| Cyprinus carpio genome assembly common carp genome ,scaffold LG42
File_R_cluster_1_biclust_result_1_bclustnum_609_kamer_1_number_1	emb|LN590674.1| Cyprinus carpio genome assembly common carp genome ,scaffold LG42	6.656726524	6.701444262	6.864635856	2.608576031	2.867569302	2.797634931	1.479625311	1.850393091	1.20741587	0	1.958256476	2.242865874	0	0	0.693147181	0.693147181	1.08780072	0	1.088140989	1.164056649	1.086846678	1.098612289	0	1.098612289	2.592437309	2.641126616	2.72434341	2.070342773	2.142620545	2.495953739	emb|LN590674.1| Cyprinus carpio genome assembly common carp genome ,scaffold LG42
File_R_cluster_1_biclust_result_1_bclustnum_61125_kamer_1_number_1	emb|LN590705.1| Cyprinus carpio genome assembly common carp genome ,scaffold LG11	6.177803025	6.358483309	6.097397649	1.296788056	1.689975882	1.542746676	0	1.047080369	0.693147181	0	1.228666393	0.693147181	0	0.693147181	0	0.693147181	0.693147181	0	0	0	0.693147181	0	0.693147181	0	1.879152024	2.689614639	2.116420561	0.693147181	0	0	emb|LN590705.1| Cyprinus carpio genome assembly common carp genome ,scaffold LG11
File_R_cluster_1_biclust_result_1_bclustnum_613700_kamer_1_number_1	emb|LN590674.1| Cyprinus carpio genome assembly common carp genome ,scaffold LG42	6.509600386	6.618860471	6.296199145	3.029988762	2.69497847	3.246490992	1.411937741	1.368901478	1.677218049	0	1.677218049	1.890850372	0	1.053761356	0	1.711716484	2.150568468	1.549800428	0.693147181	1.049162907	0.693147181	0	0.693147181	0	4.191817553	4.615377909	4.364173206	1.660182356	1.871802177	1.871802177	emb|LN590674.1| Cyprinus carpio genome assembly common carp genome ,scaffold LG42
File_R_cluster_1_biclust_result_1_bclustnum_613960_kamer_1_number_1	emb|LN590674.1| Cyprinus carpio genome assembly common carp genome ,scaffold LG42	6.200178491	5.864375217	6.591450113	3.316456153	3.014308659	2.80411767	2.1102132	2.288739686	1.680285862	0	2.043548785	1.953027617	0	0	0.693147181	0.693147181	0	0	1.307513565	0.693147181	0.851372405	0	0	0.693147181	3.656808123	3.969584116	3.680406157	1.714271689	2.636590003	2.419692345	emb|LN590674.1| Cyprinus carpio genome assembly common carp genome ,scaffold LG42
File_R_cluster_1_biclust_result_1_bclustnum_614532_kamer_1_number_1	emb|LN590674.1| Cyprinus carpio genome assembly common carp genome ,scaffold LG42	6.212255333	6.252433608	6.227721738	3.076736058	2.621038824	2.958331503	2.420368129	1.93874166	1.458615023	0	1.963609726	2.076311649	0	0.693147181	0	0.693147181	1.076138296	0.693147181	0.693147181	0.693147181	1.170585603	0.693147181	0	0	3.092745548	3.295373796	3.47506723	1.864991343	1.772590241	2.155630294	emb|LN590674.1| Cyprinus carpio genome assembly common carp genome ,scaffold LG42
File_R_cluster_1_biclust_result_1_bclustnum_615432_kamer_1_number_1	emb|LN590674.1| Cyprinus carpio genome assembly common carp genome ,scaffold LG42	6.168258354	6.71417053	6.539567169	2.707203176	2.18590857	2.590901964	1.450634425	0.693147181	0	0	1.016374952	1.01523068	0.693147181	0.693147181	0	0.693147181	0	0	0	0.693147181	0.693147181	0	0	0	3.186980535	3.076551603	4.086082189	1.098612289	1.086637543	0.693147181	emb|LN590674.1| Cyprinus carpio genome assembly common carp genome ,scaffold LG42
File_R_cluster_1_biclust_result_1_bclustnum_619146_kamer_1_number_1	emb|LN590713.1| Cyprinus carpio genome assembly common carp genome ,scaffold LG20	3.452118607	3.983440934	3.443093999	2.705059065	2.859213566	2.916559188	6.736347549	6.832243707	6.896589169	0	1.224654457	1.304696486	0	0.693147181	0	0	1.353505122	0	0.693147181	0.693147181	0.693147181	0	0	0	3.505064783	3.73838127	3.684766005	2.083221887	1.938859638	1.740727544	emb|LN590713.1| Cyprinus carpio genome assembly common carp genome ,scaffold LG20
File_R_cluster_1_biclust_result_1_bclustnum_62_kamer_1_number_1	emb|LN590714.1| Cyprinus carpio genome assembly common carp genome ,scaffold LG27	5.643469679	5.378643111	5.41839111	5.179967295	6.734658245	6.709643307	5.22862425	5.443283137	4.22165393	3.342441222	3.096143059	3.158063685	1.098612289	1.499089422	2.184066162	2.11692517	1.732918464	4.492334019	2.001809676	1.821612726	9.465393359	0.693147181	0.909600401	0.693147181	4.605635078	8.032590716	4.710232657	3.872543859	4.432615181	4.846522939	emb|LN590714.1| Cyprinus carpio genome assembly common carp genome ,scaffold LG27
File_R_cluster_1_biclust_result_1_bclustnum_62241_kamer_1_number_1	emb|LN590674.1| Cyprinus carpio genome assembly common carp genome ,scaffold LG42	6.214852069	6.425285469	6.100592457	2.038056889	1.773741449	1.606694152	0	0.693147181	0	0	1.047792566	0.693147181	0.693147181	0	0	0.693147181	1.080431346	0	0	1.079381898	1.023809716	0	0.693147181	0	1.759719976	1.305406922	2.41253307	0.693147181	1.086637543	1.045123604	emb|LN590674.1| Cyprinus carpio genome assembly common carp genome ,scaffold LG42
File_R_cluster_1_biclust_result_1_bclustnum_626154_kamer_1_number_1	emb|LN590674.1| Cyprinus carpio genome assembly common carp genome ,scaffold LG42	5.90050265	6.33734595	6.107926711	1.397263974	2.070207792	1.931095234	6.655682277	6.709197017	6.743222558	0	2.393876298	2.366663508	0.97344959	1.544899391	1.523496508	3.074016513	2.964700737	1.88798741	1.892106941	2.240396874	2.942115229	0	0	0	3.437773576	3.802732555	3.782852377	1.939587345	1.72329146	1.60057475	emb|LN590674.1| Cyprinus carpio genome assembly common carp genome ,scaffold LG42
File_R_cluster_1_biclust_result_1_bclustnum_630043_kamer_1_number_1	emb|LN590674.1| Cyprinus carpio genome assembly common carp genome ,scaffold LG42	5.440532818	5.47275795	6.822544825	1.075353897	1.673975809	1.852667972	0.693147181	0	0	0	2.482712578	1.639744008	1.365241803	1.290149583	1.808708355	1.518221342	1.372689736	1.891843087	1.00680397	0.693147181	0.693147181	0	0	0	1.368013276	0.887302607	0	1.098612289	0	0.693147181	emb|LN590674.1| Cyprinus carpio genome assembly common carp genome ,scaffold LG42
File_R_cluster_1_biclust_result_1_bclustnum_635869_kamer_1_number_1	emb|LN590674.1| Cyprinus carpio genome assembly common carp genome ,scaffold LG42	5.802290566	6.141544811	5.980547674	1.943866634	2.302585093	2.60056892	2.164964207	1.678430251	1.049821124	0	0.693147181	1.637609345	0	0	0	1.949870866	3.086902076	2.462601394	0.893169484	1.730391029	1.988289331	2.066862759	1.386294361	2.058387707	3.299005913	4.096723397	3.405474887	0.693147181	1.293921364	1.595048885	emb|LN590674.1| Cyprinus carpio genome assembly common carp genome ,scaffold LG42
File_R_cluster_1_biclust_result_1_bclustnum_63622_kamer_1_number_1	emb|LN590713.1| Cyprinus carpio genome assembly common carp genome ,scaffold LG20	5.707817656	5.619628829	7.128287424	3.342589683	3.327665654	3.322760051	2.513728935	2.241083024	2.083221887	0	0.955511445	1.550248261	0	0	0	0	0.693147181	0	1.027896505	1.003301109	1.098612289	0	0	0	2.273242787	2.621664083	2.520627656	2.463853241	2.175549131	2.409194828	emb|LN590713.1| Cyprinus carpio genome assembly common carp genome ,scaffold LG20
File_R_cluster_1_biclust_result_1_bclustnum_640132_kamer_1_number_1	emb|LN590674.1| Cyprinus carpio genome assembly common carp genome ,scaffold LG42	6.652637197	7.03306547	6.589355546	2.934521543	2.785326008	3.585965942	2.378907041	2.666331972	2.341805806	0	1.609437912	1.982724122	0	0.693147181	0	0	0	1.292266609	0.693147181	0.693147181	0.693147181	0	0	0.693147181	2.642665099	2.441233372	3.226843995	3.044522438	2.835240699	2.447447052	emb|LN590674.1| Cyprinus carpio genome assembly common carp genome ,scaffold LG42
File_R_cluster_1_biclust_result_1_bclustnum_64123_kamer_1_number_1	emb|LN590674.1| Cyprinus carpio genome assembly common carp genome ,scaffold LG42	5.947836536	6.040495159	6.015229901	4.095608763	3.302845581	2.857796912	3.346568707	3.520010997	2.581367682	0	2.489172538	2.048519598	0	1.080913247	0.693147181	0	1.080913247	1.089800243	1.517063818	0.693147181	0.693147181	0	0	0	2.981709411	3.046929063	2.844322002	2.770567932	2.97453928	2.255332047	emb|LN590674.1| Cyprinus carpio genome assembly common carp genome ,scaffold LG42
File_R_cluster_1_biclust_result_1_bclustnum_641237_kamer_1_number_1	emb|LN590705.1| Cyprinus carpio genome assembly common carp genome ,scaffold LG11	6.703818589	6.573815633	6.322938599	1.164986624	0	1.386294361	0.693147181	0.693147181	0	0	1.187166364	0.693147181	0.693147181	0	1.077558879	1.712510613	1.960835355	0.693147181	0.693147181	0.693147181	0.693147181	0	0	0	0.877882489	0.693147181	0.693147181	1.051359941	0.693147181	0.693147181	emb|LN590705.1| Cyprinus carpio genome assembly common carp genome ,scaffold LG11
File_R_cluster_1_biclust_result_1_bclustnum_641998_kamer_1_number_1	emb|LN590674.1| Cyprinus carpio genome assembly common carp genome ,scaffold LG42	5.871790976	6.116404136	5.253335691	2.147709817	2.230482033	2.198833283	2.369837117	1.386294361	0.693147181	0	1.098612289	1.349389165	1.051545139	0.693147181	0	1.520772805	2.526808062	1.890850372	0	0.693147181	1.706065406	1.716047647	1.556446335	1.558144618	2.823792638	3.492106984	2.328337631	0	1.049096361	0.906070685	emb|LN590674.1| Cyprinus carpio genome assembly common carp genome ,scaffold LG42
File_R_cluster_1_biclust_result_1_bclustnum_64859_kamer_1_number_1	emb|LN590705.1| Cyprinus carpio genome assembly common carp genome ,scaffold LG11	6.033294833	6.201595805	8.123987627	1.032764466	0.880356771	0	0	0	0.693147181	0	0.693147181	1.855475777	0	0.693147181	1.075353897	1.098612289	1.540445755	0	1.045123604	0	1.078202077	0.693147181	0	0	0.693147181	0.693147181	0.880356771	1.368275492	0.693147181	0	emb|LN590705.1| Cyprinus carpio genome assembly common carp genome ,scaffold LG11
File_R_cluster_1_biclust_result_1_bclustnum_650950_kamer_1_number_1	emb|LN590685.1| Cyprinus carpio genome assembly common carp genome ,scaffold LG16	0.693147181	0.693147181	1.345472367	1.33889086	1.365241803	1.326870737	0.693147181	0.693147181	1.071583616	7.098631804	1.367603266	0	0	0	0	0	0	0	0	0	0	0	0.693147181	0	1.019146914	0	1.098612289	0	0.693147181	0	emb|LN590685.1| Cyprinus carpio genome assembly common carp genome ,scaffold LG16
File_R_cluster_1_biclust_result_1_bclustnum_659367_kamer_1_number_1	emb|LN590705.1| Cyprinus carpio genome assembly common carp genome ,scaffold LG11	6.200389491	5.85363823	6.161641826	3.05219767	2.626370042	2.280279155	2.073911278	2.685245472	1.093696895	0	1.235814436	0.874242986	0	0	0.693147181	1.589894172	1.504077397	1.054649952	0.693147181	0.693147181	1.076138296	0	0	0	3.103662485	4.214304486	3.058430039	0.693147181	0.874242986	0.880356771	emb|LN590705.1| Cyprinus carpio genome assembly common carp genome ,scaffold LG11
File_R_cluster_1_biclust_result_1_bclustnum_663889_kamer_1_number_1	emb|LN598497.1| Cyprinus carpio genome assembly common carp genome ,scaffold 000002514	6.209302046	6.104907065	6.00924798	3.088284107	3.20122089	3.333393089	1.950229379	1.975762944	1.726454432	0	1.162203486	0	0	0.693147181	0	0	0	0	0	0.693147181	0.693147181	0	0	0	3.226538392	3.425376041	3.542974683	1.91481893	2.245832714	2.111189693	emb|LN598497.1| Cyprinus carpio genome assembly common carp genome ,scaffold 000002514
File_R_cluster_1_biclust_result_1_bclustnum_664774_kamer_1_number_1	emb|LN591055.1| Cyprinus carpio genome assembly common carp genome ,scaffold 000001389	6.07164263	6.554799126	5.993173087	2.617118422	3.502625174	3.670353911	1.793867246	2.310151396	1.719597295	0	2.223597079	2.053799322	0	0	0	0	0.984203554	0.693147181	0	0	1.002468428	0	0	0	3.840404547	3.458591694	4.458899709	1.137833002	0.693147181	1.086637543	emb|LN591055.1| Cyprinus carpio genome assembly common carp genome ,scaffold 000001389
File_R_cluster_1_biclust_result_1_bclustnum_66569_kamer_1_number_1	emb|LN590674.1| Cyprinus carpio genome assembly common carp genome ,scaffold LG42	6.185401714	6.175014516	6.489762527	1.899041637	2.298731678	1.83565354	0	1.360319927	0.693147181	0	1.098612289	1.76797382	0	0.693147181	0	0.693147181	0	0.693147181	0	0	1.073294481	0	0	0	3.148234452	3.154269035	3.597312261	0.869496774	1.368275492	0	emb|LN590674.1| Cyprinus carpio genome assembly common carp genome ,scaffold LG42
File_R_cluster_1_biclust_result_1_bclustnum_66789_kamer_1_number_1	emb|LN590705.1| Cyprinus carpio genome assembly common carp genome ,scaffold LG11	6.107724201	6.308422615	6.129019709	2.409042007	1.609437912	1.574347378	0.693147181	0.693147181	0	0	1.194337534	0	0.693147181	0	0	0	0	0.693147181	0	0	0.693147181	0	0	0	1.455743462	2.069114652	1.756912643	0	0	0.693147181	emb|LN590705.1| Cyprinus carpio genome assembly common carp genome ,scaffold LG11
File_R_cluster_1_biclust_result_1_bclustnum_66851_kamer_1_number_1	emb|LN590698.1| Cyprinus carpio genome assembly common carp genome ,scaffold LG17	8.075778574	8.154888142	7.414783702	2.2633639	3.184441718	2.967651678	2.010130316	1.822531128	2.00148	0	1.562184866	1.067358952	0	0	0	0	0	0	0.693147181	0	0	0	0	0	1.957552118	2.935493827	2.200637635	1.668664852	1.893542594	1.689243053	emb|LN590698.1| Cyprinus carpio genome assembly common carp genome ,scaffold LG17
File_R_cluster_1_biclust_result_1_bclustnum_66860_kamer_1_number_1	emb|LN590674.1| Cyprinus carpio genome assembly common carp genome ,scaffold LG42	6.917953104	7.078822071	6.757488049	1.595048885	1.732039542	1.779783037	0.693147181	0.693147181	0.693147181	0	2.116779474	2.83831794	1.088140989	1.098612289	1.078202077	2.226212559	1.941290925	1.77070606	1.077558879	1.069197209	1.318852964	0.693147181	0	0	4.471886763	3.77025896	4.14612074	0	1.098612289	0.693147181	emb|LN590674.1| Cyprinus carpio genome assembly common carp genome ,scaffold LG42
File_R_cluster_1_biclust_result_1_bclustnum_66944_kamer_1_number_1	emb|LN591055.1| Cyprinus carpio genome assembly common carp genome ,scaffold 000001389	6.900233058	7.325735084	7.108914946	3.349237198	3.895944435	3.894915503	2.130339008	2.668456618	2.289513025	0	2.702977356	2.653418005	0	0	1.043043199	0	0.693147181	0	0.693147181	0.693147181	1.070442555	0	0	0	3.931329431	3.358088051	4.570919263	2.834941262	2.656756907	1.912818614	emb|LN591055.1| Cyprinus carpio genome assembly common carp genome ,scaffold 000001389
File_R_cluster_1_biclust_result_1_bclustnum_67_kamer_1_number_1	emb|LN590674.1| Cyprinus carpio genome assembly common carp genome ,scaffold LG42	6.497569546	6.856732474	6.675140769	2.80685125	3.531251486	2.979470769	1.360091546	1.534475113	2.125765572	0	1.784979873	1.18487255	0	0	0	0	1.341558467	0.693147181	1.051359941	0.693147181	1.067840318	0.693147181	0	0	2.867592037	2.151132936	2.999106574	1.752718873	2.766319109	2.256721243	emb|LN590674.1| Cyprinus carpio genome assembly common carp genome ,scaffold LG42
File_R_cluster_1_biclust_result_1_bclustnum_67207_kamer_1_number_1	emb|LN590713.1| Cyprinus carpio genome assembly common carp genome ,scaffold LG20	6.826961623	6.693510764	6.362082829	2.37556972	3.088197501	2.698874903	1.920069127	1.340752914	2.151762203	0	1.715893029	1.186003316	1.338285142	1.088760586	0.693147181	1.734601644	1.34117408	1.068757709	0.693147181	0.693147181	0.693147181	0	0	0	1.683349865	2.126272645	2.035689477	2.418882581	2.028148247	1.207245443	emb|LN590713.1| Cyprinus carpio genome assembly common carp genome ,scaffold LG20
File_R_cluster_1_biclust_result_1_bclustnum_674482_kamer_1_number_1	emb|LN590698.1| Cyprinus carpio genome assembly common carp genome ,scaffold LG17	6.269664304	6.674529826	6.54673089	2.847087243	3.615972683	3.639557899	2.616190727	2.729485482	2.561095788	0	1.686398954	2.1086969	0	0	0	0.693147181	1.098612289	0	0.693147181	0	0.693147181	0.693147181	0	0	3.175968324	3.320077705	3.673765816	2.053124517	1.689279985	2.380257918	emb|LN590698.1| Cyprinus carpio genome assembly common carp genome ,scaffold LG17
File_R_cluster_1_biclust_result_1_bclustnum_680834_kamer_1_number_1	emb|LN590705.1| Cyprinus carpio genome assembly common carp genome ,scaffold LG11	6.526537318	6.358897169	5.38840941	2.786978442	2.164487864	2.10271974	1.023389336	1.479625311	1.428853246	0	2.128921944	1.777160082	0.693147181	1.017644431	0.693147181	0	1.558144618	0.693147181	0.693147181	0	1.076138296	2.403741785	2.429640562	1.849578591	3.069061728	1.023389336	2.033093892	1.524794638	1.905704036	0.693147181	emb|LN590705.1| Cyprinus carpio genome assembly common carp genome ,scaffold LG11
File_R_cluster_1_biclust_result_1_bclustnum_6817_kamer_1_number_1	emb|LN590698.1| Cyprinus carpio genome assembly common carp genome ,scaffold LG17	0	0	0	0	0	0	0	0	0	8.49587762	0	0	0	0	0	0	0	0	0	0	0	0	0	0	0	0	0	0	0	0	emb|LN590698.1| Cyprinus carpio genome assembly common carp genome ,scaffold LG17
File_R_cluster_1_biclust_result_1_bclustnum_68206_kamer_1_number_1	emb|LN590674.1| Cyprinus carpio genome assembly common carp genome ,scaffold LG42	6.063671249	6.029913328	6.310412701	3.63139334	3.214365669	3.161454318	2.033656732	2.310057108	1.789620517	0	1.254524274	1.720932774	0	0.693147181	0	0	1.059081127	0	0	0	0.693147181	0	0	0	3.768921393	3.791736088	3.450184352	2.128587595	2.819275485	2.532759867	emb|LN590674.1| Cyprinus carpio genome assembly common carp genome ,scaffold LG42
File_R_cluster_1_biclust_result_1_bclustnum_690_kamer_1_number_1	emb|LN591126.1| Cyprinus carpio genome assembly common carp genome ,scaffold 000028826	6.707595564	6.722741702	6.744483125	3.998200702	3.968505413	3.955134218	2.07095942	2.399121793	2.338421239	0	3.83098864	3.523176048	0	0	0	0.693147181	0	1.016374952	1.905175948	1.91119891	1.974455956	0	0	0	3.41550783	3.778027505	3.598051713	2.348108021	2.386981387	2.654382159	emb|LN591126.1| Cyprinus carpio genome assembly common carp genome ,scaffold 000028826
File_R_cluster_1_biclust_result_1_bclustnum_69010_kamer_1_number_1	emb|LN590674.1| Cyprinus carpio genome assembly common carp genome ,scaffold LG42	6.794662726	6.711006549	6.817830571	1.19919943	1.410308695	1.763980515	1.186003316	0.693147181	1.040548759	0	1.307962481	1.177602135	0	0	0	1.891389095	1.864080131	0.693147181	0	0.693147181	1.068757709	0.693147181	0	0	1.037417504	2.958757037	2.081152577	0.693147181	0.693147181	1.098612289	emb|LN590674.1| Cyprinus carpio genome assembly common carp genome ,scaffold LG42
File_R_cluster_1_biclust_result_1_bclustnum_691592_kamer_1_number_1	emb|LN590705.1| Cyprinus carpio genome assembly common carp genome ,scaffold LG11	6.070994046	6.331452027	6.08139437	1.084428844	1.527279468	1.417492595	0	1.144493464	0	0	1.96165835	1.191395035	0	0	0	0	1.056052674	0.693147181	0.896373698	0.693147181	0	1.06686359	1.068757709	0.693147181	1.835395102	3.614664938	2.031432322	1.024502778	0.835323597	0	emb|LN590705.1| Cyprinus carpio genome assembly common carp genome ,scaffold LG11
File_R_cluster_1_biclust_result_1_bclustnum_692055_kamer_1_number_1	emb|LN590674.1| Cyprinus carpio genome assembly common carp genome ,scaffold LG42	7.383827954	7.749934346	6.951149961	3.260881119	4.027419195	3.733520547	3.708611	4.149326628	2.899986499	0	2.095613813	2.328337631	3.617257236	3.451348524	2.937838295	2.371578364	2.987589209	2.607964637	1.643628689	2.469082099	3.122809759	3.008154794	3.540959324	3.585253544	3.75917481	5.189328053	3.55493369	1.326576203	1.922872523	0.693147181	emb|LN590674.1| Cyprinus carpio genome assembly common carp genome ,scaffold LG42
File_R_cluster_1_biclust_result_1_bclustnum_6927_kamer_1_number_1	emb|LN590674.1| Cyprinus carpio genome assembly common carp genome ,scaffold LG42	6.777818561	7.476970558	6.946447006	2.447689262	3.737669618	4.207143345	2.241874968	2.397895273	2.302585093	0	2.63905733	2.42976385	0	0	0.693147181	0.693147181	2.186325396	0	0.693147181	1.2148712	0.693147181	0	0.693147181	0	4.254349501	4.469052595	5.319594397	0.896924409	0.868595168	1.48098162	emb|LN590674.1| Cyprinus carpio genome assembly common carp genome ,scaffold LG42
File_R_cluster_1_biclust_result_1_bclustnum_6964_kamer_1_number_1	emb|LN590674.1| Cyprinus carpio genome assembly common carp genome ,scaffold LG42	7.063005354	6.806757455	7.487498571	2.859597495	3.905507828	3.487414832	3.4042228	2.737065166	2.444041252	0	2.251974723	2.123893739	1.278079776	0.693147181	0	1.022900467	1.098612289	1.044546734	0.693147181	0.889622269	0.897360684	0.693147181	0	0	4.394288648	5.166863814	3.841823692	2.502427264	2.207587364	2.731428129	emb|LN590674.1| Cyprinus carpio genome assembly common carp genome ,scaffold LG42
File_R_cluster_1_biclust_result_1_bclustnum_698021_kamer_1_number_1	emb|LN594250.1| Cyprinus carpio genome assembly common carp genome ,scaffold 000002350	7.141538033	7.246168488	6.941006286	4.395210593	3.358745588	3.454093391	2.368280133	2.307510941	2.246733002	0	3.653060548	3.003725244	0	0	0	0	0	0	0.693147181	0.873274665	0.936971405	0.693147181	0	0	4.460216088	4.258671856	4.440761236	2.1690537	2.253104891	2.510615006	emb|LN594250.1| Cyprinus carpio genome assembly common carp genome ,scaffold 000002350
File_R_cluster_1_biclust_result_1_bclustnum_698937_kamer_1_number_1	emb|LN590688.1| Cyprinus carpio genome assembly common carp genome ,scaffold LG48	0	0.693147181	0.693147181	0.693147181	0	0.693147181	0	0.717439713	0	7.033929675	2.451005098	2.723319693	0	1.098612289	0.693147181	0	0	0	0	0.693147181	0.693147181	1.071583616	1.098612289	0	0	0	0.693147181	0	0	0.693147181	emb|LN590688.1| Cyprinus carpio genome assembly common carp genome ,scaffold LG48
File_R_cluster_1_biclust_result_1_bclustnum_704662_kamer_1_number_1	emb|LN590674.1| Cyprinus carpio genome assembly common carp genome ,scaffold LG42	6.734575013	6.657289348	6.424562656	0.693147181	1.098612289	1.277884757	0.693147181	1.098612289	0.693147181	0	1.649711917	0.693147181	0	1.35812377	0	1.343733877	1.689104549	1.089309148	0	1.28692144	1.194337534	0.693147181	0	0.693147181	1.581657588	2.344174153	1.382863482	0.921990458	0	0.693147181	emb|LN590674.1| Cyprinus carpio genome assembly common carp genome ,scaffold LG42
File_R_cluster_1_biclust_result_1_bclustnum_7050_kamer_1_number_1	emb|LN591305.1| Cyprinus carpio genome assembly common carp genome ,scaffold 000001301	4.988873549	5.152383668	5.118077641	8.936467841	9.005594049	8.737521584	1.983952971	1.583387528	1.617973381	0	3.000719815	3.159427261	2.19986664	2.209843512	1.646577616	2.660651069	3.030418684	2.580663699	2.364889245	2.647733865	2.190855449	1.838278803	1.88798741	2.079441542	2.818822049	3.160640596	2.865458427	2.014903021	2.623631823	2.52687199	emb|LN591305.1| Cyprinus carpio genome assembly common carp genome ,scaffold 000001301
File_R_cluster_1_biclust_result_1_bclustnum_706594_kamer_1_number_1	emb|LN590674.1| Cyprinus carpio genome assembly common carp genome ,scaffold LG42	6.797639028	6.698551614	6.832099186	3.002464561	2.97326169	2.86415326	2.302585093	2.601563125	2.09950884	0	1.855029999	1.41706602	0	0	0	0	1.326870737	0	0.693147181	0	0.693147181	1.06686359	0.693147181	0	2.688948928	2.521391251	2.425758021	1.989712384	2.661901545	2.866005064	emb|LN590674.1| Cyprinus carpio genome assembly common carp genome ,scaffold LG42
File_R_cluster_1_biclust_result_1_bclustnum_711252_kamer_1_number_1	emb|LN593543.1| Cyprinus carpio genome assembly common carp genome ,scaffold 000001911	5.631562975	5.762576402	5.573912941	3.778809277	6.843956751	6.83244751	5.241228362	5.022939289	4.014579594	0	2.812782519	2.524439814	1.029619417	1.098612289	1.568615918	2.023201823	1.589235205	1.84103047	1.40761789	0.693147181	1.4663363	1.576648156	1.839011944	1.542746676	4.237120798	8.262156415	4.204277608	4.056478265	4.036383473	4.070734697	emb|LN593543.1| Cyprinus carpio genome assembly common carp genome ,scaffold 000001911
File_R_cluster_1_biclust_result_1_bclustnum_715126_kamer_1_number_1	emb|LN590705.1| Cyprinus carpio genome assembly common carp genome ,scaffold LG11	5.929738068	6.059286734	5.500682535	1.271225763	1.075353897	1.871802177	0.874242986	1.086637543	1.064710737	0	0.693147181	0	0.693147181	0	1.056052674	1.309920747	1.942143062	1.323775133	0	0.693147181	1.049096361	0	0	0	1.97564508	2.243104691	2.281782206	1.545360085	1.098612289	1.086637543	emb|LN590705.1| Cyprinus carpio genome assembly common carp genome ,scaffold LG11
File_R_cluster_1_biclust_result_1_bclustnum_71597_kamer_1_number_1	emb|LN590705.1| Cyprinus carpio genome assembly common carp genome ,scaffold LG11	7.182739575	6.90424914	5.918299592	1.713507796	0.874242986	1.615302681	0.693147181	1.098612289	0.693147181	0	2.101260517	1.696693926	1.457246645	1.078202077	0.693147181	0.693147181	1.679171043	1.323775133	1.077558879	1.646961032	0.693147181	0	1.280933845	1.284510774	2.419060608	1.47758511	2.786282039	1.231530577	0.693147181	0.693147181	emb|LN590705.1| Cyprinus carpio genome assembly common carp genome ,scaffold LG11
File_R_cluster_1_biclust_result_1_bclustnum_719382_kamer_1_number_1	emb|LN590698.1| Cyprinus carpio genome assembly common carp genome ,scaffold LG17	5.855292528	6.086179095	5.755694744	2.723319693	3.447788304	2.857354872	2.702910348	2.665087027	1.438739742	0	1.889397241	1.21924164	1.046785519	1.732570171	1.098612289	2.219953203	2.361425536	1.785790021	1.393957425	1.289444747	2.139161048	1.935653443	2.061422673	1.930486093	3.900573712	4.453809943	4.126388946	2.334382165	2.242344522	1.177469679	emb|LN590698.1| Cyprinus carpio genome assembly common carp genome ,scaffold LG17
File_R_cluster_1_biclust_result_1_bclustnum_72105_kamer_1_number_1	emb|LN590674.1| Cyprinus carpio genome assembly common carp genome ,scaffold LG42	6.791237193	6.756059916	6.722997958	1.54637883	1.64222838	1.139434283	1.848016922	1.098612289	0.693147181	0	2.1102132	2.063693185	0	0.693147181	0	0.693147181	1.34117408	0.693147181	0	0	0	1.098612289	0.693147181	1.378690525	2.262919721	3.043197751	2.36972398	1.098612289	1.06686359	1.368275492	emb|LN590674.1| Cyprinus carpio genome assembly common carp genome ,scaffold LG42
File_R_cluster_1_biclust_result_1_bclustnum_72136_kamer_1_number_1	emb|LN590698.1| Cyprinus carpio genome assembly common carp genome ,scaffold LG17	8.320808409	8.255090493	8.345574158	5.015622836	3.806940229	3.734987453	3.350342588	3.719651113	2.675010347	0	4.201515937	4.12995299	0.693147181	0	0	0	2.3198266	1.577350576	0.693147181	0.911149539	1.450010669	0	0	0.693147181	5.036062596	5.399013019	5.491929115	2.268683886	2.029791633	1.723223636	emb|LN590698.1| Cyprinus carpio genome assembly common carp genome ,scaffold LG17
File_R_cluster_1_biclust_result_1_bclustnum_72222_kamer_1_number_1	emb|LN590674.1| Cyprinus carpio genome assembly common carp genome ,scaffold LG42	5.854822607	5.747122895	6.070710014	3.559542111	3.44468143	3.892438474	1.98329814	2.174751721	2.428671339	0	1.0190242	1.178654996	0	0	0	0.693147181	0.693147181	0	0.693147181	0.693147181	0.693147181	0	0	0	2.614654854	3.064558464	3.017371449	2.139259956	2.867546567	2.62044956	emb|LN590674.1| Cyprinus carpio genome assembly common carp genome ,scaffold LG42
File_R_cluster_1_biclust_result_1_bclustnum_722810_kamer_1_number_1	emb|LN590705.1| Cyprinus carpio genome assembly common carp genome ,scaffold LG11	6.705522809	6.790143354	7.126617679	1.159766966	1.009139704	1.275664431	0	0.693147181	1.076138296	0	0.866419584	1.740939747	0.693147181	0.693147181	0.693147181	1.098612289	0.693147181	0	0	0.693147181	1.048350042	0	0	0	0.693147181	1.604017247	1.651773002	1.377326772	0	1.045123604	emb|LN590705.1| Cyprinus carpio genome assembly common carp genome ,scaffold LG11
File_R_cluster_1_biclust_result_1_bclustnum_723039_kamer_1_number_1	emb|LN590767.1| Cyprinus carpio genome assembly common carp genome ,scaffold 000000187	6.24293313	6.54818042	6.465976747	2.994090927	3.184180855	3.473062125	2.13716903	1.928383159	2.049589109	0	1.989354075	1.066574516	0	0.693147181	0	1.312187543	0.693147181	0.693147181	0.693147181	1.025586295	0.893816058	1.325670833	1.039771284	0.693147181	3.664599569	3.180866538	3.652762519	3.168600959	2.976585131	2.058027642	emb|LN590767.1| Cyprinus carpio genome assembly common carp genome ,scaffold 000000187
File_R_cluster_1_biclust_result_1_bclustnum_723710_kamer_1_number_1	emb|LN590705.1| Cyprinus carpio genome assembly common carp genome ,scaffold LG11	6.044322617	6.318252542	6.059475937	1.693319396	1.48098162	1.809859668	0.693147181	0	0	0	1.670546182	0.693147181	0	0.693147181	0	0	0	0	0	0	0.693147181	0	0	0	1.934099246	1.333557921	1.352393672	0.693147181	0.862830882	0.693147181	emb|LN590705.1| Cyprinus carpio genome assembly common carp genome ,scaffold LG11
File_R_cluster_1_biclust_result_1_bclustnum_72380_kamer_1_number_1	emb|LN590674.1| Cyprinus carpio genome assembly common carp genome ,scaffold LG42	6.046594099	6.161350771	6.180244371	1.581464273	1.595048885	1.229947521	0.693147181	0	0.693147181	0	2.008489162	1.098612289	0	0	0	1.309062283	0.693147181	0.693147181	0	0.693147181	0.885691308	0	0	0.693147181	2.058680005	2.391649445	1.805364828	1.169564573	1.086637543	1.336696996	emb|LN590674.1| Cyprinus carpio genome assembly common carp genome ,scaffold LG42
File_R_cluster_1_biclust_result_1_bclustnum_72907_kamer_1_number_1	emb|LN590705.1| Cyprinus carpio genome assembly common carp genome ,scaffold LG11	6.546113736	6.774730044	6.663149299	1.779783037	1.087052396	1.330995687	0.693147181	1.086637543	0	0	1.340977907	1.32428331	0	0	0	0	0	0	0	0	0	0	0	0	2.257269685	2.482796091	2.361569783	1.02715209	0.693147181	0	emb|LN590705.1| Cyprinus carpio genome assembly common carp genome ,scaffold LG11
File_R_cluster_1_biclust_result_1_bclustnum_73542_kamer_1_number_1	emb|LN590674.1| Cyprinus carpio genome assembly common carp genome ,scaffold LG42	6.328829243	6.559409834	6.303486731	5.247508165	5.884516661	5.227444157	3.869829237	4.554878495	4.014009034	0.693147181	2.28060632	2.412147767	0	0	0	0	0	0.693147181	1.916922612	1.437588531	1.786772053	0	0	0.693147181	4.147095128	4.033775043	4.215436193	5.046491379	4.407763823	4.810052002	emb|LN590674.1| Cyprinus carpio genome assembly common carp genome ,scaffold LG42
File_R_cluster_1_biclust_result_1_bclustnum_736494_kamer_1_number_1	emb|LN590674.1| Cyprinus carpio genome assembly common carp genome ,scaffold LG42	6.707422082	6.668299402	6.329745861	3.179315534	2.528540687	2.76670897	1.662256144	1.581266807	1.863217744	0	1.514773324	1.354545663	0.693147181	0.693147181	1.098612289	1.325670833	1.826246239	1.046785519	0.889856403	0	0.693147181	0	0.693147181	0	1.941137349	2.845391826	1.844342432	2.216142282	2.574229243	2.222819764	emb|LN590674.1| Cyprinus carpio genome assembly common carp genome ,scaffold LG42
File_R_cluster_1_biclust_result_1_bclustnum_73681_kamer_1_number_1	emb|LN590705.1| Cyprinus carpio genome assembly common carp genome ,scaffold LG11	6.887360717	6.397387884	5.999583995	2.115033081	2.792317817	2.501673628	1.69014932	1.568011569	2.645252386	0	1.9963751	0	0	0	0.693147181	1.54691762	3.126049757	1.749199855	0.693147181	0.693147181	1.675927654	0	1.020358813	1.538210403	2.42646506	3.240664714	2.287769888	1.330414248	1.233952877	1.338046425	emb|LN590705.1| Cyprinus carpio genome assembly common carp genome ,scaffold LG11
File_R_cluster_1_biclust_result_1_bclustnum_738458_kamer_1_number_1	emb|LN590705.1| Cyprinus carpio genome assembly common carp genome ,scaffold LG11	6.550695975	6.575304545	6.724173729	0.901254248	0.693147181	0.693147181	0	0.882903531	0	0	1.098612289	0.693147181	0	0	0	1.377926952	0.998530409	0.693147181	0	0	0	0	0	0	1.088612457	2.659112026	1.591365587	0.693147181	0.693147181	0	emb|LN590705.1| Cyprinus carpio genome assembly common carp genome ,scaffold LG11
File_R_cluster_1_biclust_result_1_bclustnum_74536_kamer_1_number_1	emb|LN590674.1| Cyprinus carpio genome assembly common carp genome ,scaffold LG42	6.112156681	6.154082847	6.165844234	1.517870719	1.689896534	1.57646834	1.527817795	1.085006819	0.860718824	0	1.867635045	1.928383159	0	0	0	0.693147181	1.038508365	0	0.693147181	1.040626474	0.693147181	0	0.693147181	0	2.192709957	2.079441542	2.039815446	0.693147181	1.194337534	0.693147181	emb|LN590674.1| Cyprinus carpio genome assembly common carp genome ,scaffold LG42
File_R_cluster_1_biclust_result_1_bclustnum_745590_kamer_1_number_1	emb|LN590674.1| Cyprinus carpio genome assembly common carp genome ,scaffold LG42	6.733486412	7.093296647	6.67393746	3.354130232	3.234508988	3.01642666	1.760987498	1.350361437	2.349732003	0	1.455286233	1.541315376	0	0	0.693147181	0	0.693147181	0.693147181	0	0.854691886	0.693147181	0	0	0	2.106189358	1.988927218	1.965878029	2.026332125	2.50482365	2.406945108	emb|LN590674.1| Cyprinus carpio genome assembly common carp genome ,scaffold LG42
File_R_cluster_1_biclust_result_1_bclustnum_74706_kamer_1_number_1	emb|LN590674.1| Cyprinus carpio genome assembly common carp genome ,scaffold LG42	5.826297998	6.098954793	5.932582001	3.639250563	3.369039137	3.490352293	2.514012275	2.619889072	3.018882233	0	2.864729111	2.489114451	0	0	0.693147181	1.343733877	1.761387887	0.693147181	1.252762968	0.693147181	1.362577835	0	0	0	3.219383696	3.967181421	3.336715748	2.136238849	1.90668955	1.721356676	emb|LN590674.1| Cyprinus carpio genome assembly common carp genome ,scaffold LG42
File_R_cluster_1_biclust_result_1_bclustnum_7490_kamer_1_number_1	emb|LN591055.1| Cyprinus carpio genome assembly common carp genome ,scaffold 000001389	5.771677855	5.714026492	6.031050578	3.126760536	3.093793212	2.204367892	2.507637991	2.019653055	1.740466175	0	1.516695234	1.473306571	0	0	0.693147181	0.693147181	1.018569303	0	0	0.693147181	0	0	0	0	2.677199164	2.703653885	2.958990485	2.612742688	1.886675632	1.835245113	emb|LN591055.1| Cyprinus carpio genome assembly common carp genome ,scaffold 000001389
File_R_cluster_1_biclust_result_1_bclustnum_753111_kamer_1_number_1	emb|LN590700.1| Cyprinus carpio genome assembly common carp genome ,scaffold LG10	6.033654406	6.029451326	6.03030538	5.909508552	5.760817918	5.721196631	4.438722372	4.533507683	4.420178267	2.890371758	3.622547325	3.566539489	0	0	0	0	0	0	2.882541179	2.328402926	2.633714511	0.693147181	0.693147181	0	5.067746299	5.015038917	5.080764409	5.065230797	5.260319505	5.274419063	emb|LN590700.1| Cyprinus carpio genome assembly common carp genome ,scaffold LG10
File_R_cluster_1_biclust_result_1_bclustnum_756062_kamer_1_number_1	emb|LN590705.1| Cyprinus carpio genome assembly common carp genome ,scaffold LG11	6.028054399	6.206549717	6.089498287	1.313269264	2.122891281	1.764730797	0	0	0	0	1.382815818	1.093971537	0.693147181	0.693147181	0.693147181	0	1.098612289	0.693147181	0	0	0	0	0	0	2.907993359	2.672768387	3.331729397	0	0	0	emb|LN590705.1| Cyprinus carpio genome assembly common carp genome ,scaffold LG11
File_R_cluster_1_biclust_result_1_bclustnum_762673_kamer_1_number_1	emb|LN590698.1| Cyprinus carpio genome assembly common carp genome ,scaffold LG17	0	0.693147181	0	0	0	0	0	0	0	7.030362216	0	0	0	0	0	0	0	0	0	0	0	0	0	0	0	0	0	0	0	0	emb|LN590698.1| Cyprinus carpio genome assembly common carp genome ,scaffold LG17
File_R_cluster_1_biclust_result_1_bclustnum_76309_kamer_1_number_1	emb|LN590674.1| Cyprinus carpio genome assembly common carp genome ,scaffold LG42	6.268366851	6.283966237	6.550035504	2.788486677	2.773388402	2.702843336	1.537694834	1.845826164	1.243442525	0	1.360976553	1.436305209	0	0.693147181	0	0.693147181	1.027517209	0.693147181	0	0	0.693147181	0	0	0	3.123720833	3.507327601	3.490663244	2.403940599	1.8223598	2.838715825	emb|LN590674.1| Cyprinus carpio genome assembly common carp genome ,scaffold LG42
File_R_cluster_1_biclust_result_1_bclustnum_763943_kamer_1_number_1	emb|LN591212.1| Cyprinus carpio genome assembly common carp genome ,scaffold 000028978	6.230579868	6.272103122	5.893942673	6.051879735	5.995538736	6.007785631	4.502493842	4.965289192	5.015536596	6.548330844	3.674027203	3.625907705	0	0	0	0	0.693147181	0	2.635077994	2.280467288	2.094040703	1.071583616	0.693147181	0.693147181	4.733229132	4.962529895	5.212078418	5.356100308	5.409075787	5.445033334	emb|LN591212.1| Cyprinus carpio genome assembly common carp genome ,scaffold 000028978
File_R_cluster_1_biclust_result_1_bclustnum_764081_kamer_1_number_1	emb|LN590698.1| Cyprinus carpio genome assembly common carp genome ,scaffold LG17	3.814961293	3.771323123	3.583085511	3.317021979	5.416584729	5.179060746	3.967043246	4.200486772	3.232119736	0	1.087440112	1.333183627	0	0.693147181	0.693147181	0	0.693147181	0	0.693147181	0	0.890505122	0.693147181	0	0	4.082029036	6.706842777	3.978220774	2.208094178	2.768411259	2.864962778	emb|LN590698.1| Cyprinus carpio genome assembly common carp genome ,scaffold LG17
File_R_cluster_1_biclust_result_1_bclustnum_764309_kamer_1_number_1	emb|LN590698.1| Cyprinus carpio genome assembly common carp genome ,scaffold LG17	5.985531984	6.005692843	5.982461642	2.784239339	2.567983212	2.665170535	1.604547976	1.818482539	2.060749173	0	2.024611738	2.466445622	0	0	0.693147181	0.693147181	0	0.693147181	0.861285293	0.693147181	0.693147181	0	0	0	2.754125572	2.411107604	3.483489864	1.998509376	1.3832397	1.831965274	emb|LN590698.1| Cyprinus carpio genome assembly common carp genome ,scaffold LG17
File_R_cluster_1_biclust_result_1_bclustnum_768209_kamer_1_number_1	emb|LN590674.1| Cyprinus carpio genome assembly common carp genome ,scaffold LG42	6.699372253	6.800820191	6.862174061	2.761161176	3.196814248	2.794552004	1.738413192	1.305168359	1.318240334	0	0.849150429	1.798231812	0	0	0	0	0.693147181	0	0.913005341	0.693147181	0.879249083	0	0	0	3.54190091	3.20369721	3.983921252	2.77689195	2.462430953	2.386095934	emb|LN590674.1| Cyprinus carpio genome assembly common carp genome ,scaffold LG42
File_R_cluster_1_biclust_result_1_bclustnum_76983_kamer_1_number_1	emb|LN590674.1| Cyprinus carpio genome assembly common carp genome ,scaffold LG42	6.665665883	6.783185893	7.183195221	2.432173723	2.079441542	1.452543138	0.874326418	0.693147181	1.588530876	0	1.989936604	1.375966209	0	0	0.693147181	1.556640329	1.39160026	0	0.896924409	0	1.306828987	0	0.693147181	0	1.740225795	1.474730972	1.544350974	1.386294361	0.693147181	1.335001067	emb|LN590674.1| Cyprinus carpio genome assembly common carp genome ,scaffold LG42
File_R_cluster_1_biclust_result_1_bclustnum_77137_kamer_1_number_1	emb|LN592699.1| Cyprinus carpio genome assembly common carp genome ,scaffold 000000883	0	0	0.693147181	0	0	0	0	0	0	7.101964233	0	0	0	0	0	0	0	0	0	0	0	0	0	0	0	0	0	0	0	0	emb|LN592699.1| Cyprinus carpio genome assembly common carp genome ,scaffold 000000883
File_R_cluster_1_biclust_result_1_bclustnum_7763_kamer_1_number_1	emb|LN590698.1| Cyprinus carpio genome assembly common carp genome ,scaffold LG17	0	0	0	0	0	0	0	0	0	6.812365996	0	0	0	0	0	0	0	0	0	0	0	0	0	0	0	0	0.693147181	0	0	0	emb|LN590698.1| Cyprinus carpio genome assembly common carp genome ,scaffold LG17
File_R_cluster_1_biclust_result_1_bclustnum_778940_kamer_1_number_1	emb|LN590682.1| Cyprinus carpio genome assembly common carp genome ,scaffold LG21	5.966310828	5.994836356	6.059153569	6.284902523	6.009542649	6.139037211	4.873921701	5.242186072	5.144524956	3.095229132	3.526645778	3.889920536	0	0	0	0	0	0	2.597386761	2.193574591	2.312293811	0.693147181	0.693147181	0	5.025550179	4.952518774	4.995569032	5.313732934	5.647007517	5.653534248	emb|LN590682.1| Cyprinus carpio genome assembly common carp genome ,scaffold LG21
File_R_cluster_1_biclust_result_1_bclustnum_779797_kamer_1_number_1	emb|LN590674.1| Cyprinus carpio genome assembly common carp genome ,scaffold LG42	6.753201018	6.640493943	6.298303818	1.065276094	1.432507398	1.473586115	0.693147181	1.027517209	0.870828823	0	0	0.693147181	0	0.693147181	0	1.05977097	1.692386548	1.36330461	0	1.029619417	0.693147181	0	0	0	1.301841526	2.467633321	1.309062283	0	1.574347378	1.098612289	emb|LN590674.1| Cyprinus carpio genome assembly common carp genome ,scaffold LG42
File_R_cluster_1_biclust_result_1_bclustnum_781803_kamer_1_number_1	emb|LN590674.1| Cyprinus carpio genome assembly common carp genome ,scaffold LG42	6.710213683	6.613686186	6.25920472	0	0.893816058	0.693147181	0	0.693147181	0.693147181	0	1.037987875	0.693147181	0	1.078202077	0	0.693147181	1.949566314	0.693147181	0	0.693147181	1.016935747	0	0	0	0.901254248	1.435774763	0.693147181	0.693147181	0	0	emb|LN590674.1| Cyprinus carpio genome assembly common carp genome ,scaffold LG42
File_R_cluster_1_biclust_result_1_bclustnum_782564_kamer_1_number_1	emb|LN590698.1| Cyprinus carpio genome assembly common carp genome ,scaffold LG17	6.362374442	6.169167119	5.810005618	3.13681074	2.912845108	2.578723291	1.452252967	2.066095377	1.423474532	0	2.038856498	2.10929399	0	0	0	0	0	0	0.693147181	0.693147181	0.693147181	1.945910149	0.693147181	0.693147181	3.11888752	3.193713902	3.568250184	2.281144886	2.42641205	1.74132896	emb|LN590698.1| Cyprinus carpio genome assembly common carp genome ,scaffold LG17
File_R_cluster_1_biclust_result_1_bclustnum_784090_kamer_1_number_1	emb|LN591305.1| Cyprinus carpio genome assembly common carp genome ,scaffold 000001301	5.121657751	5.46846934	5.383090407	3.174689845	3.054458624	3.008554714	3.333357417	3.088106329	3.277752096	0	2.394958237	2.69397156	1.386294361	1.386294361	1.785070481	1.386294361	0	0	0.876813666	0.87007924	0.693147181	2.927453433	2.86105737	3.121483479	6.962839877	6.764089276	6.993116128	2.820801339	2.230707708	2.147628088	emb|LN591305.1| Cyprinus carpio genome assembly common carp genome ,scaffold 000001301
File_R_cluster_1_biclust_result_1_bclustnum_784894_kamer_1_number_1	emb|LN590674.1| Cyprinus carpio genome assembly common carp genome ,scaffold LG42	6.028741064	6.160599542	6.204446645	1.825891939	1.683349865	0.693147181	0.693147181	0.693147181	0	0	1.170070563	1.022745848	0	0	0	0.693147181	0	0.693147181	0	0	0.693147181	1.078810861	0	0	2.089662875	2.28322081	1.550182478	0	0.693147181	0	emb|LN590674.1| Cyprinus carpio genome assembly common carp genome ,scaffold LG42
File_R_cluster_1_biclust_result_1_bclustnum_7858_kamer_1_number_1	emb|LN590674.1| Cyprinus carpio genome assembly common carp genome ,scaffold LG42	7.252854482	7.353062702	6.330599307	2.936014116	2.72434341	2.580436502	2.151087557	2.149400113	1.832002096	0	1.786916092	2.083058742	1.864785308	0.693147181	1.006237463	1.91200909	1.687472451	1.970807619	1.031920339	0.693147181	1.573309055	2.111189693	0.693147181	0.693147181	3.262544324	2.610709294	2.712871891	1.91481893	2.026332125	1.574036616	emb|LN590674.1| Cyprinus carpio genome assembly common carp genome ,scaffold LG42
File_R_cluster_1_biclust_result_1_bclustnum_78872_kamer_1_number_1	emb|LN590674.1| Cyprinus carpio genome assembly common carp genome ,scaffold LG42	6.493324095	6.768602401	6.635821876	3.136089691	3.051673002	2.8657147	2.770016667	2.824309113	2.172569797	0	2.065648098	1.56461208	0	0.693147181	0.693147181	1.28692144	2.042301562	2.179042503	0	0	0	1.078202077	2.19103211	2.029844177	3.855960461	3.388503825	3.766918618	0	0.875468737	1.089436991	emb|LN590674.1| Cyprinus carpio genome assembly common carp genome ,scaffold LG42
File_R_cluster_1_biclust_result_1_bclustnum_789721_kamer_1_number_1	emb|LN590705.1| Cyprinus carpio genome assembly common carp genome ,scaffold LG11	6.803104511	6.700440785	6.773986144	0.693147181	1.612212061	1.54637883	1.024502778	1.098612289	1.010320092	0	0.693147181	0.693147181	0.693147181	0.693147181	0	1.037987875	1.752538623	0.693147181	0.693147181	0.693147181	0.693147181	0	0.693147181	0	1.208130151	3.263956259	1.307156452	1.086637543	0.693147181	1.087052396	emb|LN590705.1| Cyprinus carpio genome assembly common carp genome ,scaffold LG11
File_R_cluster_1_biclust_result_1_bclustnum_791_kamer_1_number_1	emb|LN590674.1| Cyprinus carpio genome assembly common carp genome ,scaffold LG42	6.022371954	6.585559053	6.149785804	1.39551175	1.710343319	1.692386548	0.849081982	0	0	0	1.197192872	0.899197471	0.693147181	0	0.693147181	0	1.72359661	0.693147181	0	0.693147181	0.693147181	0	0	0	3.039217917	3.387939888	4.123144177	1.086637543	1.086637543	1.098612289	emb|LN590674.1| Cyprinus carpio genome assembly common carp genome ,scaffold LG42
File_R_cluster_1_biclust_result_1_bclustnum_79170_kamer_1_number_1	emb|LN590713.1| Cyprinus carpio genome assembly common carp genome ,scaffold LG20	5.997304959	6.076724391	6.391773049	2.483714273	2.873395134	2.821378886	2.159484634	2.397895273	2.406945108	0	1.098612289	1.364633959	0	0	0	0.693147181	0.693147181	0	1.098612289	0.693147181	0.693147181	0	0.693147181	1.386294361	2.912350665	2.355448854	3.083875926	1.701712581	1.928960163	2.312535424	emb|LN590713.1| Cyprinus carpio genome assembly common carp genome ,scaffold LG20
File_R_cluster_1_biclust_result_1_bclustnum_7920_kamer_1_number_1	emb|LN590674.1| Cyprinus carpio genome assembly common carp genome ,scaffold LG42	6.559448085	6.82394423	6.774299312	2.952715163	3.308910294	3.350367138	1.806994491	2.025374668	2.173373499	0	1.585468938	1.369710099	0	0	0	0	0	0.693147181	0.693147181	0	0.693147181	0	0	0.693147181	3.917533793	4.35637159	4.385638853	1.428167803	2.446832612	2.219203484	emb|LN590674.1| Cyprinus carpio genome assembly common carp genome ,scaffold LG42
File_R_cluster_1_biclust_result_1_bclustnum_79401_kamer_1_number_1	emb|LN590705.1| Cyprinus carpio genome assembly common carp genome ,scaffold LG11	6.210349042	6.391335705	6.079775288	1.787118718	1.375822219	0.693147181	1.446918983	0.693147181	0	0	1.606656047	1.60386642	0	0	0	1.060872345	1.386294361	0	0	0.693147181	1.236761337	0.693147181	0.693147181	0.693147181	2.306743435	3.037219647	2.217088205	0	0.693147181	1.473893066	emb|LN590705.1| Cyprinus carpio genome assembly common carp genome ,scaffold LG11
File_R_cluster_1_biclust_result_1_bclustnum_7951_kamer_1_number_1	emb|LN590685.1| Cyprinus carpio genome assembly common carp genome ,scaffold LG16	0.693147181	1.556193242	1.524444135	0.693147181	1.504077397	1.319283453	0.693147181	0.693147181	0.693147181	7.567542141	4.2938291	4.234106505	0	0	0	0	0	0	0	0	0	0.693147181	0	0.693147181	0	0.808830235	0	0.693147181	0.693147181	0	emb|LN590685.1| Cyprinus carpio genome assembly common carp genome ,scaffold LG16
File_R_cluster_1_biclust_result_1_bclustnum_79510_kamer_1_number_1	emb|LN590674.1| Cyprinus carpio genome assembly common carp genome ,scaffold LG42	6.072009436	6.77184735	6.291593213	3.810926718	3.626048807	3.524096198	2.22115267	1.715385856	1.780877138	0	1.789592122	1.671569163	0	0	0	0	1.517537513	0.693147181	0.860202804	0.869039783	1.080675719	0	0	0	3.614031978	3.694950985	4.335109278	3.076228724	2.712340983	2.558141622	emb|LN590674.1| Cyprinus carpio genome assembly common carp genome ,scaffold LG42
File_R_cluster_1_biclust_result_1_bclustnum_798111_kamer_1_number_1	emb|LN590674.1| Cyprinus carpio genome assembly common carp genome ,scaffold LG42	6.22474653	6.136763307	5.689446876	1.499089422	1.547562509	1.479759658	0.693147181	1.098612289	0.870828823	0	1.432507398	0.693147181	0.693147181	0	0.693147181	1.078810861	1.057112981	0	0.693147181	0	1.060872345	0.693147181	0	0	2.077751364	2.37427672	3.02633907	1.351203309	1.087052396	1.368275492	emb|LN590674.1| Cyprinus carpio genome assembly common carp genome ,scaffold LG42
File_R_cluster_1_biclust_result_1_bclustnum_798762_kamer_1_number_1	emb|LN590674.1| Cyprinus carpio genome assembly common carp genome ,scaffold LG42	6.031269224	6.244029027	6.046941826	5.534377143	6.006404882	6.02775067	4.575867011	4.688196132	4.356894707	1.876019426	9.497809922	9.435074657	1.398716881	1.024502778	1.187559846	1.2753628	1.020650747	1.078810861	1.957125592	1.462113547	1.749711028	0	0.693147181	0.693147181	4.476992437	6.703477642	4.707744825	4.324496828	4.943547749	4.338443018	emb|LN590674.1| Cyprinus carpio genome assembly common carp genome ,scaffold LG42
File_R_cluster_1_biclust_result_1_bclustnum_79955_kamer_1_number_1	emb|LN590674.1| Cyprinus carpio genome assembly common carp genome ,scaffold LG42	7.412486369	7.409039528	6.162735689	3.096296807	3.147397009	3.15607659	1.888386963	2.156134028	2.111529909	0	2.487320401	1.397946214	2.244249163	2.318585403	1.874280641	2.1102132	1.966113256	2.090741209	1.343733877	1.591892895	1.926679273	1.032362081	1.493265828	0	3.927268205	3.873612684	3.684886493	2.40184202	2.19561328	2.189789226	emb|LN590674.1| Cyprinus carpio genome assembly common carp genome ,scaffold LG42
File_R_cluster_1_biclust_result_1_bclustnum_80304_kamer_1_number_1	emb|LN590698.1| Cyprinus carpio genome assembly common carp genome ,scaffold LG17	7.194842174	7.178667521	6.883308886	4.412495217	3.174401335	3.416496419	2.459588842	2.749671876	2.024142868	0	3.321883575	3.238678452	0	0	0	0	1.307702892	1.062895297	1.076870983	0.693147181	0.693147181	0	0	0	4.40060302	4.173617743	4.716380558	1.707137961	2.349732003	2.014903021	emb|LN590698.1| Cyprinus carpio genome assembly common carp genome ,scaffold LG17
File_R_cluster_1_biclust_result_1_bclustnum_81705_kamer_1_number_1	emb|LN590674.1| Cyprinus carpio genome assembly common carp genome ,scaffold LG42	6.609792541	6.82970076	7.168656936	1.086637543	1.471815879	1.003777662	0	0	0	0	1.198243423	0.90479693	0	0.980830503	0.693147181	0.693147181	1.609437912	1.088760586	0	0	0.693147181	1.067840318	0.693147181	0	0.693147181	2.399194429	1.51355677	0.893071234	0.893071234	0	emb|LN590674.1| Cyprinus carpio genome assembly common carp genome ,scaffold LG42
File_R_cluster_1_biclust_result_1_bclustnum_817534_kamer_1_number_1	emb|LN590705.1| Cyprinus carpio genome assembly common carp genome ,scaffold LG11	7.296460725	7.271418746	6.303292741	2.648470034	2.822776719	2.878866942	2.1102132	2.122613573	0.693147181	0	2.032395793	2.095849935	1.900240112	1.05977097	1.895556263	1.609437912	3.161445845	2.588703443	1.006237463	1.429466392	1.297943906	2.362070242	2.743957739	2.794521432	3.602937505	3.100358019	3.333253959	2.421673942	0.902402739	1.820746911	emb|LN590705.1| Cyprinus carpio genome assembly common carp genome ,scaffold LG11
File_R_cluster_1_biclust_result_1_bclustnum_819040_kamer_1_number_1	emb|LN590705.1| Cyprinus carpio genome assembly common carp genome ,scaffold LG11	6.652129857	6.845491502	7.203405521	1.802958195	1.773576829	1.755766076	1.098612289	0.693147181	1.011600912	0	1.659514867	0.910872077	1.053761356	0	0.693147181	0	1.501362604	1.386294361	1.053151077	0.693147181	1.56461208	1.068757709	0	0	2.388018476	2.43881908	2.101163894	1.086637543	1.312707023	1.009139704	emb|LN590705.1| Cyprinus carpio genome assembly common carp genome ,scaffold LG11
File_R_cluster_1_biclust_result_1_bclustnum_82_kamer_1_number_1	emb|LN590674.1| Cyprinus carpio genome assembly common carp genome ,scaffold LG42	3.843652083	3.417962721	3.926411	0.899197471	1.389910316	0.91289698	2.848478588	3.32661032	2.890371758	0	2.107612245	2.91699746	1.348836493	1.232143265	1.690442619	2.501435952	2.49610208	1.56264605	1.057370067	1.057370067	1.822678188	0	0	0	9.073470843	9.081422322	9.184744577	0.693147181	0.693147181	0	emb|LN590674.1| Cyprinus carpio genome assembly common carp genome ,scaffold LG42
File_R_cluster_1_biclust_result_1_bclustnum_820290_kamer_1_number_1	emb|LN590705.1| Cyprinus carpio genome assembly common carp genome ,scaffold LG11	5.906562762	5.7951181	6.277721855	2.627432884	2.59173359	2.488574913	1.460664085	2.073911278	0.899197471	0	2.174083316	2.235690732	0	0	0	1.936650266	1.727738148	1.301953053	0.693147181	0.861897902	1.480226319	1.521840909	0.693147181	1.280933845	3.615281352	3.937575736	4.075290854	1.188934291	1.360091546	0.693147181	emb|LN590705.1| Cyprinus carpio genome assembly common carp genome ,scaffold LG11
File_R_cluster_1_biclust_result_1_bclustnum_821_kamer_1_number_1	emb|LN590674.1| Cyprinus carpio genome assembly common carp genome ,scaffold LG42	6.409399911	6.124151521	6.403882098	1.220779773	1.970105077	1.176455656	1.193922468	2.14843458	1.067840318	0	0.90479693	1.378914698	0.693147181	0.693147181	0.693147181	2.571520031	1.540445755	1.727855413	0	1.240441658	0	0	0	0	1.921115281	3.093634546	1.319850025	1.312187543	1.565634394	0.693147181	emb|LN590674.1| Cyprinus carpio genome assembly common carp genome ,scaffold LG42
File_R_cluster_1_biclust_result_1_bclustnum_821080_kamer_1_number_1	emb|LN590713.1| Cyprinus carpio genome assembly common carp genome ,scaffold LG20	6.522955661	6.756379911	6.687108608	3.235701476	2.345586152	3.256814948	2.032524185	1.212684745	2.035381237	0	1.757857918	0.995427183	0	0	0	0	1.038508365	0	1.076870983	0	1.413693065	0	0	0	2.740033247	2.425908309	3.213734632	2.079441542	2.233591864	2.067271537	emb|LN590713.1| Cyprinus carpio genome assembly common carp genome ,scaffold LG20
File_R_cluster_1_biclust_result_1_bclustnum_821859_kamer_1_number_1	emb|LN591305.1| Cyprinus carpio genome assembly common carp genome ,scaffold 000001301	7.104825865	7.151916406	6.989639367	2.202419947	3.614710711	3.193558017	2.621038824	2.5828195	1.768043796	0	1.493604974	2.216142282	2.383810178	2.022283716	2.007467445	2.074622448	1.765092033	1.35812377	1.943676227	2.138226826	2.302585093	4.249045091	4.487771951	4.257791894	3.121126272	4.55025138	3.415675401	2.336382473	2.453157951	1.640209571	emb|LN591305.1| Cyprinus carpio genome assembly common carp genome ,scaffold 000001301
File_R_cluster_1_biclust_result_1_bclustnum_824107_kamer_1_number_1	emb|LN590674.1| Cyprinus carpio genome assembly common carp genome ,scaffold LG42	6.173065011	6.004328945	6.268220901	3.162982493	4.013608003	4.114021365	2.76454395	2.821075269	2.743771208	0	2.646451355	2.351375257	0.693147181	0.693147181	0	1.579584707	1.373049534	0.693147181	0.693147181	0	0.89451536	0	0.693147181	0.693147181	3.876263177	4.270593552	3.043302646	2.007080504	2.035208789	2.273597997	emb|LN590674.1| Cyprinus carpio genome assembly common carp genome ,scaffold LG42
File_R_cluster_1_biclust_result_1_bclustnum_824679_kamer_1_number_1	emb|LN590674.1| Cyprinus carpio genome assembly common carp genome ,scaffold LG42	4.922998267	4.754451889	5.033980658	5.271310954	5.496700903	5.551796118	3.707630058	3.674854056	2.76000994	0	2.369419102	2.792042024	1.481604541	1.59163233	1.749199855	2.035638546	2.602689685	1.35644064	1.873998225	1.865867679	1.646961032	0.693147181	0	0	7.374008133	7.441455278	7.435078073	3.330102302	3.43490936	3.586292865	emb|LN590674.1| Cyprinus carpio genome assembly common carp genome ,scaffold LG42
File_R_cluster_1_biclust_result_1_bclustnum_826274_kamer_1_number_1	emb|LN590674.1| Cyprinus carpio genome assembly common carp genome ,scaffold LG42	5.70411242	6.109631953	5.907411517	3.024931788	3.001271901	3.089359219	2.199964155	2.254534955	1.291983682	0	1.631416602	1.452252967	0	0	0	0	0	0	0.926763698	0.693147181	0	0	0	0	2.917435541	3.363457438	3.565176744	1.425007734	2.284566733	1.348553552	emb|LN590674.1| Cyprinus carpio genome assembly common carp genome ,scaffold LG42
File_R_cluster_1_biclust_result_1_bclustnum_827888_kamer_1_number_1	emb|LN590713.1| Cyprinus carpio genome assembly common carp genome ,scaffold LG20	6.219683198	6.669288677	6.120881864	3.2615406	3.245848762	3.64157556	2.130339008	2.008824584	2.340564652	0	2.649078379	2.596574731	1.051209661	0.693147181	0	0.693147181	0.693147181	0	0	0.693147181	0.693147181	0	0	0.693147181	3.800172587	3.601637141	4.3008098	2.922118026	2.587034446	2.067835704	emb|LN590713.1| Cyprinus carpio genome assembly common carp genome ,scaffold LG20
File_R_cluster_1_biclust_result_1_bclustnum_829081_kamer_1_number_1	emb|LN590705.1| Cyprinus carpio genome assembly common carp genome ,scaffold LG11	6.074396155	6.411818268	6.418263789	1.39574209	2.056451791	1.752094791	0.693147181	0.693147181	0	0	0.693147181	1.304696486	0	0	0	0.693147181	0	0	0.693147181	0.693147181	0	0	0	0	2.862914912	3.091042453	3.332650839	1.351203309	1.386294361	0.693147181	emb|LN590705.1| Cyprinus carpio genome assembly common carp genome ,scaffold LG11
File_R_cluster_1_biclust_result_1_bclustnum_830381_kamer_1_number_1	emb|LN591305.1| Cyprinus carpio genome assembly common carp genome ,scaffold 000001301	3.027056507	3.395118945	2.750758416	2.297013601	6.456055115	6.475993422	3.289643654	3.341422607	1.367603266	0	1.075353897	0	0	0	0	0	0	0	0	0	0.693147181	0	0	0	3.324237141	8.27526939	3.175020066	2.620711498	2.743224276	2.739374434	emb|LN591305.1| Cyprinus carpio genome assembly common carp genome ,scaffold 000001301
File_R_cluster_1_biclust_result_1_bclustnum_832142_kamer_1_number_1	emb|LN590965.1| Cyprinus carpio genome assembly common carp genome ,scaffold 000000967	0	0	0	0	0.693147181	0	0	0	0	6.292655586	0	0	0	0	0	0	0	0	0	0	0	0	0	0	0	0	0	0	0	0	emb|LN590965.1| Cyprinus carpio genome assembly common carp genome ,scaffold 000000967
File_R_cluster_1_biclust_result_1_bclustnum_83699_kamer_1_number_1	emb|LN590713.1| Cyprinus carpio genome assembly common carp genome ,scaffold LG20	5.821639582	6.069843564	5.762799531	2.694816352	3.658268173	3.525495445	2.140066163	1.777068754	1.572396263	0	1.361804415	1.700192276	0	0	0.693147181	0	0.693147181	0	0.693147181	1.034368835	0.693147181	0.693147181	0	0	3.700993284	3.544214888	4.255435389	2.176958376	2.868245433	2.622107344	emb|LN590713.1| Cyprinus carpio genome assembly common carp genome ,scaffold LG20
File_R_cluster_1_biclust_result_1_bclustnum_83776_kamer_1_number_1	emb|LN590674.1| Cyprinus carpio genome assembly common carp genome ,scaffold LG42	5.922224324	5.792550086	6.210345024	3.54626407	3.301914655	3.270674791	2.11212894	2.198630256	2.711417858	0	2.702126021	2.738799233	0	1.487270278	0.693147181	0	1.927424625	1.089561453	0.693147181	1.013929108	0.693147181	0	0	0	2.904340407	3.956342237	2.990020995	1.929072038	3.016485429	2.173024094	emb|LN590674.1| Cyprinus carpio genome assembly common carp genome ,scaffold LG42
File_R_cluster_1_biclust_result_1_bclustnum_83885_kamer_1_number_1	emb|LN590713.1| Cyprinus carpio genome assembly common carp genome ,scaffold LG20	6.220417193	6.714944502	6.49645518	3.524576581	3.084640184	3.491443244	2.236834104	2.577690915	2.585257136	0	1.03691772	1.156598138	0	0	0	0.693147181	0	0.693147181	0.91289698	1.064710737	0.693147181	0	0	0	2.720097342	2.946190077	2.365559892	2.901421594	2.213828193	2.036882362	emb|LN590713.1| Cyprinus carpio genome assembly common carp genome ,scaffold LG20
File_R_cluster_1_biclust_result_1_bclustnum_844199_kamer_1_number_1	emb|LN590674.1| Cyprinus carpio genome assembly common carp genome ,scaffold LG42	6.009066225	6.040987776	6.080372458	3.495528294	2.761982676	3.604538146	1.700787532	2.519259766	2.35696153	0	2.232038157	1.566747507	0	0	0.693147181	1.848454813	2.205734928	0.693147181	0.916290732	0.86567931	0.693147181	0	0	0.693147181	3.16731302	3.230602794	3.004136856	2.903249593	1.738450109	2.083165848	emb|LN590674.1| Cyprinus carpio genome assembly common carp genome ,scaffold LG42
File_R_cluster_1_biclust_result_1_bclustnum_84513_kamer_1_number_1	emb|LN590674.1| Cyprinus carpio genome assembly common carp genome ,scaffold LG42	6.787369108	7.167762923	6.463857507	3.707838589	3.951543674	3.827281777	2.754571126	3.013542722	2.551638077	0	1.765372714	1.386294361	1.876916767	0.693147181	1.609437912	2.972120701	2.138035869	2.112231768	1.061471012	1.211756433	1.342373821	2.487677807	2.531424393	2.466886932	9.037047137	8.977816715	9.068386178	1.086637543	1.325912522	2.123384262	emb|LN590674.1| Cyprinus carpio genome assembly common carp genome ,scaffold LG42
File_R_cluster_1_biclust_result_1_bclustnum_845219_kamer_1_number_1	emb|LN590674.1| Cyprinus carpio genome assembly common carp genome ,scaffold LG42	6.628631149	6.724156907	7.091700517	3.655992043	2.891215846	3.517126849	2.204367892	2.223803756	2.337454043	0	1.29167869	1.507340954	0.693147181	0	0.693147181	0.693147181	1.194337534	1.017644431	0	0.693147181	0.693147181	0	0	0	2.776256986	2.425758021	2.146581364	2.493205453	2.814054509	3.015235837	emb|LN590674.1| Cyprinus carpio genome assembly common carp genome ,scaffold LG42
File_R_cluster_1_biclust_result_1_bclustnum_8464_kamer_1_number_1	emb|LN590674.1| Cyprinus carpio genome assembly common carp genome ,scaffold LG42	6.785620413	7.219685963	6.576610228	3.688154191	4.388526713	4.479639842	7.568229463	7.596989815	7.863778132	0	2.71574717	2.380618707	1.569958766	1.730798541	1.602749595	2.181223913	2.971526667	1.922599117	0.693147181	1.80137476	1.875141212	1.085189268	1.345472367	0	3.601077765	4.40777966	3.369293833	1.903619815	1.583005638	1.881786018	emb|LN590674.1| Cyprinus carpio genome assembly common carp genome ,scaffold LG42
File_R_cluster_1_biclust_result_1_bclustnum_8470_kamer_1_number_1	emb|LN590674.1| Cyprinus carpio genome assembly common carp genome ,scaffold LG42	6.979666554	6.817177185	7.448234846	3.146653458	3.124899156	2.13008475	1.098612289	1.720301061	1.785790021	0	1.652646816	1.54637883	0	0	0	1.072637855	1.318240334	0.693147181	0.881856625	0.913302271	0.922332444	0	0	0.693147181	4.393808209	5.075904798	3.894203171	2.603881567	2.244249163	1.504077397	emb|LN590674.1| Cyprinus carpio genome assembly common carp genome ,scaffold LG42
File_R_cluster_1_biclust_result_1_bclustnum_8475_kamer_1_number_1	emb|LN590674.1| Cyprinus carpio genome assembly common carp genome ,scaffold LG42	6.982992613	6.940387025	6.100935354	2.96557199	3.236118315	3.190060626	1.791759469	1.998341296	1.098612289	0	2.413580702	2.823792638	1.90355126	1.32175584	0.693147181	2.336382473	3.163003642	2.489943941	0.693147181	1.456254098	1.632361156	2.054950315	2.160724249	2.050809273	4.299550865	3.789774012	4.39212052	1.028583166	1.2671504	1.087440112	emb|LN590674.1| Cyprinus carpio genome assembly common carp genome ,scaffold LG42
File_R_cluster_1_biclust_result_1_bclustnum_848997_kamer_1_number_1	emb|LN591305.1| Cyprinus carpio genome assembly common carp genome ,scaffold 000001301	6.847192843	6.846912321	6.262304331	3.278253552	3.498732357	3.751231994	2.741787962	2.940563056	2.005050645	0	2.320078193	2.607035783	1.282615764	2.454138116	2.34540509	0	2.798299109	2.587034446	0.901903734	1.400892291	1.317825459	2.753660712	2.734367509	2.473736158	3.815771983	4.633154935	3.576138996	1.197050903	1.436595288	0.874242986	emb|LN591305.1| Cyprinus carpio genome assembly common carp genome ,scaffold 000001301
File_R_cluster_1_biclust_result_1_bclustnum_854028_kamer_1_number_1	emb|LN590674.1| Cyprinus carpio genome assembly common carp genome ,scaffold LG42	6.734868673	6.686904098	6.344096579	1.406912832	0.693147181	1.153419236	0.693147181	0	0.885691308	0	1.41996847	0.693147181	0.693147181	0.693147181	1.504077397	1.523496508	1.702288707	0.916290732	0	1.022745848	1.293921364	0	0	0.693147181	0.693147181	2.074290799	0	1.067840318	0	0	emb|LN590674.1| Cyprinus carpio genome assembly common carp genome ,scaffold LG42
File_R_cluster_1_biclust_result_1_bclustnum_85517_kamer_1_number_1	emb|LN590674.1| Cyprinus carpio genome assembly common carp genome ,scaffold LG42	6.912085888	7.229686593	6.634928978	3.658128967	3.401197382	3.139161397	2.985823342	2.756618118	1.839877979	0	1.751034692	2.282670099	0	0	0	1.056052674	2.175979377	1.738270784	0.693147181	0	1.031920339	1.577689214	2.366146574	2.588703443	4.253512634	3.540756405	4.32943513	1.817253387	1.844342432	1.791759469	emb|LN590674.1| Cyprinus carpio genome assembly common carp genome ,scaffold LG42
File_R_cluster_1_biclust_result_1_bclustnum_858959_kamer_1_number_1	emb|LN590674.1| Cyprinus carpio genome assembly common carp genome ,scaffold LG42	6.544671269	6.764253201	7.098045005	1.9953586	0	0.693147181	0.693147181	0.693147181	0.693147181	0	1.093971537	1.85020289	0.693147181	1.32175584	0	1.048350042	1.553347869	0.693147181	0.693147181	0.693147181	1.051545139	0	0.693147181	0	0.693147181	1.446918983	0.693147181	0.693147181	0.693147181	0.693147181	emb|LN590674.1| Cyprinus carpio genome assembly common carp genome ,scaffold LG42
File_R_cluster_1_biclust_result_1_bclustnum_86790_kamer_1_number_1	emb|LN590705.1| Cyprinus carpio genome assembly common carp genome ,scaffold LG11	5.757443298	6.069968379	6.036982697	1.61710048	2.573787112	2.079441542	0.693147181	1.304948722	1.075353897	0	1.313172441	0.858661619	0.693147181	0	0	0	0.693147181	0.998530409	0.693147181	0	0	0	0	0	3.131586591	2.601741088	3.410556779	0	1.368275492	1.098612289	emb|LN590705.1| Cyprinus carpio genome assembly common carp genome ,scaffold LG11
File_R_cluster_1_biclust_result_1_bclustnum_87476_kamer_1_number_1	emb|LN590705.1| Cyprinus carpio genome assembly common carp genome ,scaffold LG11	6.093344011	5.891605537	6.137232331	1.986547441	1.519826066	0.90570692	0	1.364633959	1.086637543	0	0	0.693147181	0	0	0	1.494507305	1.044546734	0	0.693147181	0	0.693147181	0	0	0	0.869496774	2.419736818	0.899197471	0.693147181	1.086637543	0.879249083	emb|LN590705.1| Cyprinus carpio genome assembly common carp genome ,scaffold LG11
File_R_cluster_1_biclust_result_1_bclustnum_876329_kamer_1_number_1	emb|LN590713.1| Cyprinus carpio genome assembly common carp genome ,scaffold LG20	7.292330369	7.525747786	7.280628322	2.924504764	3.370308529	3.146305132	2.32238772	2.459588842	1.698826961	0	2.744864174	2.687847494	0	0	0.693147181	0	0.693147181	0	1.076138296	1.042197128	1.098612289	0	0	0	4.775655301	4.145908653	4.941378102	2.473736158	2.181828892	2.440946054	emb|LN590713.1| Cyprinus carpio genome assembly common carp genome ,scaffold LG20
File_R_cluster_1_biclust_result_1_bclustnum_87819_kamer_1_number_1	emb|LN590705.1| Cyprinus carpio genome assembly common carp genome ,scaffold LG11	5.810476101	6.053166236	6.351855578	1.734601644	1.368275492	1.989177608	0.896373698	0.693147181	0	0	0	1.079918646	0	0	0	0	0.693147181	1.078202077	0	0	0	0	0	0.693147181	2.893455886	2.494122387	3.188989649	0.923953299	1.379126231	0	emb|LN590705.1| Cyprinus carpio genome assembly common carp genome ,scaffold LG11
File_R_cluster_1_biclust_result_1_bclustnum_883589_kamer_1_number_1	emb|LN590705.1| Cyprinus carpio genome assembly common carp genome ,scaffold LG11	6.276951713	5.961074925	6.085184827	1.151957144	1.703501861	1.139434283	0.885691308	1.631416602	1.084428844	0	1.84076707	1.413323267	0.693147181	0	0	1.746638316	1.442807011	0.693147181	0	0	0	0	0.693147181	0.693147181	1.558906433	2.956622354	1.800849694	1.098612289	1.086637543	1.430445209	emb|LN590705.1| Cyprinus carpio genome assembly common carp genome ,scaffold LG11
File_R_cluster_1_biclust_result_1_bclustnum_8891_kamer_1_number_1	emb|LN590674.1| Cyprinus carpio genome assembly common carp genome ,scaffold LG42	5.975276729	5.69971421	6.190815281	3.512422666	2.896055574	2.854111104	1.72506752	2.343664654	2.339814402	0	1.188934291	1.48223616	0	0	0	2.002865526	1.511798622	1.769585432	0.90570692	0.693147181	1.58002352	0	0	0	2.364717284	2.988012553	1.940328888	2.739800774	2.892220049	2.179710995	emb|LN590674.1| Cyprinus carpio genome assembly common carp genome ,scaffold LG42
File_R_cluster_1_biclust_result_1_bclustnum_894979_kamer_1_number_1	emb|LN590713.1| Cyprinus carpio genome assembly common carp genome ,scaffold LG20	6.198564079	6.017495288	6.223720455	2.703345819	2.858571445	3.226713034	2.597736699	1.97564508	2.487428467	0	0.693147181	1.59163233	0	0.693147181	0	0.693147181	1.048350042	0	0.693147181	1.354545663	0	0	0	0	2.981572495	2.860187427	3.201957514	3.45865464	2.868631588	2.314633222	emb|LN590713.1| Cyprinus carpio genome assembly common carp genome ,scaffold LG20
File_R_cluster_1_biclust_result_1_bclustnum_897589_kamer_1_number_1	emb|LN590674.1| Cyprinus carpio genome assembly common carp genome ,scaffold LG42	5.773569697	6.399163824	5.907153158	1.970912121	2.403633324	2.70889651	2.042586927	2.170137684	1.305168359	0	1.475524733	2.27923765	0.693147181	0.693147181	0	1.071213685	0	0	0	0	0.693147181	0	0	0	2.714780833	4.130599343	3.504151003	1.277661832	1.086637543	1.087052396	emb|LN590674.1| Cyprinus carpio genome assembly common carp genome ,scaffold LG42
File_R_cluster_1_biclust_result_1_bclustnum_897707_kamer_1_number_1	emb|LN590705.1| Cyprinus carpio genome assembly common carp genome ,scaffold LG11	6.24228552	6.660971998	6.367662177	5.738451176	5.684477324	5.326836794	4.364210109	4.432277636	4.186999705	2.685579618	3.054557631	2.937986629	0	0	0.693147181	0	0.906721089	0	1.981486868	1.797489687	2.330454119	0.693147181	0.693147181	0.693147181	4.829489046	4.854854397	4.996184719	5.095056096	4.101670992	4.180979341	emb|LN590705.1| Cyprinus carpio genome assembly common carp genome ,scaffold LG11
File_R_cluster_1_biclust_result_1_bclustnum_90_kamer_1_number_1	emb|LN590705.1| Cyprinus carpio genome assembly common carp genome ,scaffold LG11	6.446765304	6.442974785	6.51520146	5.895872828	6.355468568	6.303554436	4.931036377	4.98314076	4.712902886	0.693147181	9.949445137	9.900192129	1.343733877	1.30405612	1.424035615	2.025220281	1.939243692	1.351925459	2.48490665	2.246733002	2.180830933	0.693147181	0	0	5.427299678	7.060708099	5.459487637	5.130460687	5.355599939	5.177837573	emb|LN590705.1| Cyprinus carpio genome assembly common carp genome ,scaffold LG11
File_R_cluster_1_biclust_result_1_bclustnum_904698_kamer_1_number_1	emb|LN591305.1| Cyprinus carpio genome assembly common carp genome ,scaffold 000001301	5.983417254	6.178371409	5.819516004	1.336570887	0	1.171636579	0.693147181	0.693147181	0.693147181	0	0.876713795	1.06582391	0	0	0	0	0	0.693147181	0.693147181	0.693147181	0	1.085189268	1.076138296	1.4663363	2.273817238	2.385608278	1.541510188	1.093623197	1.098612289	0	emb|LN591305.1| Cyprinus carpio genome assembly common carp genome ,scaffold 000001301
File_R_cluster_1_biclust_result_1_bclustnum_905997_kamer_1_number_1	emb|LN590705.1| Cyprinus carpio genome assembly common carp genome ,scaffold LG11	7.099713586	7.071403571	7.369884234	0	0	0	0	0	0	0	1.355523249	2.338303526	0	0.693147181	0	1.098612289	1.859200025	1.309920747	0	0.693147181	1.386294361	0	0	0	3.881563798	4.732340137	3.979965726	0	0.693147181	0.693147181	emb|LN590705.1| Cyprinus carpio genome assembly common carp genome ,scaffold LG11
File_R_cluster_1_biclust_result_1_bclustnum_909946_kamer_1_number_1	emb|LN590705.1| Cyprinus carpio genome assembly common carp genome ,scaffold LG11	5.869514404	6.071127952	6.154662746	1.065276094	1.184741054	0.902402739	0.693147181	0.927986074	0.693147181	0	0	1.317300597	1.378196663	0	1.343733877	1.780585607	1.323775133	0	1.362577835	0.693147181	1.92730529	0	0	0	0.902402739	0.881856625	1.041452698	1.143732234	0.693147181	0.693147181	emb|LN590705.1| Cyprinus carpio genome assembly common carp genome ,scaffold LG11
File_R_cluster_1_biclust_result_1_bclustnum_911925_kamer_1_number_1	emb|LN590713.1| Cyprinus carpio genome assembly common carp genome ,scaffold LG20	6.360884428	6.375629407	5.528595407	3.91845428	3.466654231	3.556187709	2.443667902	2.48490665	2.263915988	0	0.693147181	1.087052396	0	0	0	0	0	0	0.693147181	1.039424759	1.519826066	0	0	0	2.970414466	2.796207588	2.983897518	2.243744441	3.054001182	2.720867705	emb|LN590713.1| Cyprinus carpio genome assembly common carp genome ,scaffold LG20
File_R_cluster_1_biclust_result_1_bclustnum_91827_kamer_1_number_1	emb|LN590674.1| Cyprinus carpio genome assembly common carp genome ,scaffold LG42	6.314352071	6.397999083	6.1252784	2.087321662	1.683193823	2.179231445	1.191234009	1.09002889	1.386294361	0	1.78964724	1.558794933	0	0	0	0	0.693147181	0	0	0	0.693147181	0	0	0	3.333525066	2.768725018	3.457599769	1.266750401	0.693147181	0.693147181	emb|LN590674.1| Cyprinus carpio genome assembly common carp genome ,scaffold LG42
File_R_cluster_1_biclust_result_1_bclustnum_919076_kamer_1_number_1	emb|LN590705.1| Cyprinus carpio genome assembly common carp genome ,scaffold LG11	5.949918332	6.429025689	6.169610732	2.087223682	1.254615537	1.750697863	0.693147181	0.693147181	0	0	1.34757952	1.09002889	0	0	0	0	1.082218644	0	0	0	0	0.693147181	0	0	2.208413964	2.339856793	3.208696188	1.111189529	1.092641164	1.360091546	emb|LN590705.1| Cyprinus carpio genome assembly common carp genome ,scaffold LG11
File_R_cluster_1_biclust_result_1_bclustnum_921900_kamer_1_number_1	emb|LN590674.1| Cyprinus carpio genome assembly common carp genome ,scaffold LG42	6.959626406	7.227749641	7.171418699	2.38416508	2.5119461	2.621038824	1.905831925	1.828573442	1.073294481	0	1.370345349	1.995302853	0	0.693147181	0	0	1.048602381	0.693147181	0	0	0.693147181	0	0	0	3.664522723	3.585600105	4.107384176	0	1.086637543	0.693147181	emb|LN590674.1| Cyprinus carpio genome assembly common carp genome ,scaffold LG42
File_R_cluster_1_biclust_result_1_bclustnum_922763_kamer_1_number_1	emb|LN590674.1| Cyprinus carpio genome assembly common carp genome ,scaffold LG42	6.59821607	7.122608561	6.700092529	1.9953586	1.609437912	1.587777	0.693147181	1.098612289	0.693147181	0	0.693147181	1.027517209	0	0	1.080913247	0	0.693147181	0.693147181	0	0	0.693147181	0	0	0	0.693147181	1.574347378	1.559493182	1.086637543	1.131811705	0	emb|LN590674.1| Cyprinus carpio genome assembly common carp genome ,scaffold LG42
File_R_cluster_1_biclust_result_1_bclustnum_925_kamer_1_number_1	emb|LN590674.1| Cyprinus carpio genome assembly common carp genome ,scaffold LG42	6.425594854	6.403302638	6.283828144	1.535100068	2.607655115	2.357751079	0.693147181	1.151893938	0	0	3.110524174	3.486965208	2.600509533	2.410443486	2.455057222	2.558141622	4.474048459	2.361350104	1.175205978	2.593245227	1.882081471	0.693147181	0	0.693147181	1.789268035	3.875234532	2.029718067	2.095755247	1.653240421	1.644631296	emb|LN590674.1| Cyprinus carpio genome assembly common carp genome ,scaffold LG42
File_R_cluster_1_biclust_result_1_bclustnum_925428_kamer_1_number_1	emb|LN591055.1| Cyprinus carpio genome assembly common carp genome ,scaffold 000001389	6.774223886	6.52473196	7.041883993	3.502245613	3.157000421	2.867609087	1.94409994	2.03292105	2.294863357	0	1.962258638	2.195780201	0	0	0	0.693147181	0.693147181	0	0.693147181	0	0	0	0	0	3.662586812	4.200717565	3.880387849	1.643149246	1.853415716	2.666804506	emb|LN591055.1| Cyprinus carpio genome assembly common carp genome ,scaffold 000001389
File_R_cluster_1_biclust_result_1_bclustnum_928261_kamer_1_number_1	emb|LN590674.1| Cyprinus carpio genome assembly common carp genome ,scaffold LG42	6.274370231	6.236852839	6.381728027	3.304936083	4.210490703	4.050089598	2.971413966	2.262844805	2.403859271	0	2.133167126	1.747504505	0	0.693147181	0	1.343733877	1.848454813	0.693147181	0.693147181	1.248995882	1.070442555	0	0.693147181	0	3.762406365	4.55360317	3.563477783	2.332143895	2.753469611	2.092289897	emb|LN590674.1| Cyprinus carpio genome assembly common carp genome ,scaffold LG42
File_R_cluster_1_biclust_result_1_bclustnum_936131_kamer_1_number_1	emb|LN590705.1| Cyprinus carpio genome assembly common carp genome ,scaffold LG11	6.184089095	5.979536186	6.025070972	1.154964266	1.064710737	1.087247959	1.208312375	1.473004026	1.378914698	0	0	0.913386519	0	0	0	1.06686359	1.561809473	1.056052674	0.693147181	0.693147181	1.087052396	0	0	0	1.371695819	2.579337655	1.843535647	1.098612289	0	1.439216453	emb|LN590705.1| Cyprinus carpio genome assembly common carp genome ,scaffold LG11
File_R_cluster_1_biclust_result_1_bclustnum_93889_kamer_1_number_1	emb|LN590674.1| Cyprinus carpio genome assembly common carp genome ,scaffold LG42	6.769858945	6.980708299	6.848650502	0.902496021	1.936210401	1.689896534	1.080431346	0	1.579257017	0	1.687400304	1.094098785	0	0.693147181	0.693147181	1.314320264	2.163323026	1.173373381	0.693147181	0	1.3334525	1.008665699	0.693147181	0	1.21892841	2.298522853	0.891325682	0.693147181	0.693147181	1.080180122	emb|LN590674.1| Cyprinus carpio genome assembly common carp genome ,scaffold LG42
File_R_cluster_1_biclust_result_1_bclustnum_939958_kamer_1_number_1	emb|LN590674.1| Cyprinus carpio genome assembly common carp genome ,scaffold LG42	6.696303116	6.573069645	6.344672739	0.693147181	0.874242986	1.35812377	0.693147181	0.693147181	0.892481529	0	0.869496774	0.947789399	0.693147181	0	0.693147181	0.693147181	1.758969369	0	0.693147181	1.067840318	0	0	0.693147181	0.693147181	1.266750401	1.55443036	0.693147181	1.075353897	1.037987875	1.368275492	emb|LN590674.1| Cyprinus carpio genome assembly common carp genome ,scaffold LG42
File_R_cluster_1_biclust_result_1_bclustnum_94_kamer_1_number_1	emb|LN595047.1| Cyprinus carpio genome assembly common carp genome ,scaffold 000002296	5.89458739	5.841327469	5.927248641	9.52661719	9.462739767	9.461394766	4.572597406	5.129502187	4.682242332	3.061187562	3.804319748	3.782351582	1.555636211	1.649442933	1.996290884	1.854937691	2.322833699	0.977660488	1.910330343	1.999889547	2.521640298	1.386294361	0.693147181	0	4.795410308	4.655406922	4.718498871	5.047770501	4.758714968	4.943298194	emb|LN595047.1| Cyprinus carpio genome assembly common carp genome ,scaffold 000002296
File_R_cluster_1_biclust_result_1_bclustnum_9402_kamer_1_number_1	emb|LN590705.1| Cyprinus carpio genome assembly common carp genome ,scaffold LG11	7.49874791	7.53410539	7.544623071	5.487258631	5.877696565	5.843167534	3.544523978	3.523373716	3.350156687	0	4.230318179	3.91636158	0	0	0	0	0.693147181	0	1.110445335	1.269760545	0.693147181	0	0	0	3.938057157	5.156137253	3.97683274	3.429771881	3.370786283	3.536960033	emb|LN590705.1| Cyprinus carpio genome assembly common carp genome ,scaffold LG11
File_R_cluster_1_biclust_result_1_bclustnum_94022_kamer_1_number_1	emb|LN590674.1| Cyprinus carpio genome assembly common carp genome ,scaffold LG42	6.165331716	6.404714276	6.099044598	2.089525527	1.256723686	1.719305257	0.693147181	0.693147181	0.693147181	0	1.309062283	0	0	0.693147181	0	0	0	0	0	0	0.693147181	0	0	0	1.752718873	1.565231029	0.905419857	0.693147181	0.693147181	1.086637543	emb|LN590674.1| Cyprinus carpio genome assembly common carp genome ,scaffold LG42
File_R_cluster_1_biclust_result_1_bclustnum_942127_kamer_1_number_1	emb|LN590705.1| Cyprinus carpio genome assembly common carp genome ,scaffold LG11	5.770100661	6.097932699	5.622782086	1.588161159	1.833870233	1.74469232	1.360091546	0.693147181	0.987136818	0	0.693147181	1.024179648	0	0	0	0	0.693147181	0	0.693147181	0.693147181	0	0	0	0	3.206135004	3.699893575	4.204692619	1.086637543	0.693147181	0.693147181	emb|LN590705.1| Cyprinus carpio genome assembly common carp genome ,scaffold LG11
File_R_cluster_1_biclust_result_1_bclustnum_942180_kamer_1_number_1	emb|LN590705.1| Cyprinus carpio genome assembly common carp genome ,scaffold LG11	5.807154014	6.062130352	5.742326677	1.08462492	0.693147181	0	0.693147181	0	0	0	0	1.048602381	0	0.693147181	0	0	0	0	0	0.693147181	0	0.693147181	0	0	2.525728644	1.590844114	3.045774035	0	0.693147181	0.693147181	emb|LN590705.1| Cyprinus carpio genome assembly common carp genome ,scaffold LG11
File_R_cluster_1_biclust_result_1_bclustnum_942590_kamer_1_number_1	emb|LN590713.1| Cyprinus carpio genome assembly common carp genome ,scaffold LG20	6.774439863	6.597734887	6.347814688	2.941587549	2.967636251	3.717153451	2.529593167	1.579360076	2.61982354	0	1.20936325	1.355417541	1.068757709	0.693147181	0	0.693147181	1.585626661	0.693147181	0.693147181	0.693147181	0.693147181	0	0.693147181	0.693147181	2.575577296	2.498332781	2.093919972	2.995732274	3.318283055	2.76000994	emb|LN590713.1| Cyprinus carpio genome assembly common carp genome ,scaffold LG20
File_R_cluster_1_biclust_result_1_bclustnum_94364_kamer_1_number_1	emb|LN590674.1| Cyprinus carpio genome assembly common carp genome ,scaffold LG42	7.194902208	7.682063004	6.552118368	3.408242506	3.601454355	3.256345005	3.065230351	3.198673118	3.531693339	0	2.36427832	2.567277415	1.945910149	1.098612289	1.550598322	0	0	0	0.693147181	0	0.897943445	0	0.693147181	0	3.66705298	3.744858006	3.450469969	3.298078795	2.757322789	2.953174398	emb|LN590674.1| Cyprinus carpio genome assembly common carp genome ,scaffold LG42
File_R_cluster_107_biclust_result_107_bclustnum_169_kamer_1_number_1	emb|LN592002.1| Cyprinus carpio genome assembly common carp genome ,scaffold 000002322	0	0	0	0	0	0	0	0	0	4.419162243	6.186955259	6.230310173	0	0	0	2.364620484	2.600019457	2.352517462	0	0	0	2.063047897	1.721842957	1.395343296	0	0	0	0	0	0	emb|LN592002.1| Cyprinus carpio genome assembly common carp genome ,scaffold 000002322
