# Supplementary material for: Comparative Genomics Analysis of Repetitive Elements in Ten Gymnosperm Species: “Dark Repeatome” and Its Abundance in Conifer and Gnetum Species
Source: Life (Basel). 2021 Nov 15;11(11):1234. doi: 10.3390/life11111234 (PMC8620675; doi:10.3390/life11111234)
Supplement: Supplementary file 1 [file life-11-01234-s001.zip › Table_S5_Abundance_matrix_of_nuclear_genomic_Kchains_withSequences.xlsx]

## Sheet: Table_S5_Abundance_matrix_of_nu
RE_Name	Sequence	erus_communis	erus_communis	erus_communis	_baccata	_baccata	_baccata	_sylvestris	_sylvestris	_sylvestris	_sibirica	_sibirica	_sibirica	Larix_sibirica	Larix_sibirica	Larix_sibirica	Picea_glauca	Picea_glauca	Picea_glauca	_taeda	_taeda	_taeda	Picea_	Picea_	Picea_	_gnemon	_gnemon	_gnemon	_sibirica	_sibirica	_sibirica
KchainBiClust_19247_1_ClustSize_292_seq0_06__1	GGACTCGGCACAGGCGTTACATCTTTCTACAAGCTGAGATATGAGCTGTGAAGGCCTACTTA	2.62801	2.91569	3.20337	2.55305	2.70805	2.06978	3.61317	3.45263	3.32324	1.7346	2.77259	2.54704	3.50348	3.35395	3.40886	6.42449	6.40128	6.47175	3.38156	3.30199	2.99989	7.68496	7.65732	7.68185	0	0	0	4.62799	4.68213	4.47821
KchainBiClust_30196_2_ClustSize_3_seq0_06__1	ATCTTTGAAGGGTTTTCATTACGCTGTAGTGGGGAAACATCTTTGTAGAGTAGCTACAGATATGGCCGACGATCCCTCTTAATGAACAAAACTGTAGA	6.06787	6.03862	6.13636	4.32687	4.11388	4.42533	5.48648	5.42434	5.6124	4.94111	5.37823	5.30758	4.47429	4.52702	4.53892	7.47415	7.44094	7.45054	5.43029	5.44345	5.40169	8.05955	8.07756	8.07585	1.68176	1.43325	1.81829	6.78719	6.76749	6.78683
KchainBiClust_653_2_ClustSize_649_seq0_02__3	ATCTTGTTAATGTTAGAATTGTCTTATCACCCTAGTAACAGTATGAATGCATGTGAA	0	0.693147	1.36688	0	0	0	4.60231	4.66344	4.53029	0	0.653928	0.653928	1.07044	1.07044	1.38629	6.60713	6.57567	6.57597	4.69266	4.52721	4.32413	7.5501	7.52124	7.55182	0	0	0	2.71825	2.86877	2.80768
KchainBiClust_1015_2_ClustSize_3_seq0_06__2	AACAAAAACCATGGTTTGTTAGACCCATCACTGTCCGTGACACGTGTGTTGTCTTATCATGTGGAGTTTGAGTTGTATTACGACACTTTTTTGGATTTTGGTAAAACTTTATGGCCAGATTCACCTCCTCCTTCCACAGTTCGTGTTTTTA	0	0	0	0	0	0	3.45403	3.34145	3.35292	0	0	0	1.09861	1.65456	0.931558	6.63775	6.54996	6.57143	4.24516	4.13627	4.15654	7.17144	7.21653	7.19613	0	0	0	0	1.05121	0
KchainBiClust_8027_1_ClustSize_3_seq0_02__1	ATCTCTCTAAACAACTTATTTATGATCTTGGCAAATGCATGAGGTAAGTAATTTTTTATATGGAAAATGTACTT	0	0	0.367722	0.211306	0.887303	0	7.42724	7.41006	7.3931	6.43275	6.84684	6.85807	5.28061	5.27601	5.26786	4.58256	4.54058	4.51452	7.42284	7.39894	7.40233	5.21504	5.18233	5.23915	0.062524	0	0	3.36518	3.40386	3.28782
KchainBiClust_29948_1_ClustSize_138_seq0_03__1	TTTCTTCTGTTCGCACAAAATCCGGTGGGAAATTTAATTTTTCGAATGACTTCTTTTACAACATTACTTTGCTAGTCCGTTAACATCCATGGAAGTGAGTTTA	0	0	0	0	0	0	7.13157	7.11288	7.10958	6.44589	6.47713	6.39658	7.50468	7.53992	7.54742	5.80767	5.85371	5.86945	6.96677	6.93557	6.99456	7.11972	7.13506	7.17048	0	0	0	4.9045	4.95026	4.74264
KchainBiClust_18561_3_ClustSize_1298_seq0_02__3	CAAATCATGGACAAACTCTGTCCATATCTAATCAGAATCTGTAAAGAATTGCTCAATGATTTTTGCAAATCAATTACAACAGA	0	0	0	0	0	0	7.36452	7.38824	7.2888	6.86921	6.97968	6.97091	6.99555	6.95691	6.99881	6.62451	6.6022	6.56821	7.23665	7.19308	7.23607	7.9175	7.90604	7.89724	0	0	0	4.6245	4.61654	4.68081
KchainBiClust_21841_2_ClustSize_41_seq0_03__1	GCGCGCCGCCAACTATGGCTTCGGGCCACCGTATAATAGCTCCCTGGGCGATGGCTGGTTCGACACGGATACTTATATGCTGGAGATCATATTTCACGAGAGGATGAAGCAATACAGATCCTCAT	0	0	0	0	0	0	3.91746	3.57592	3.55014	6.76959	7.24101	7.19556	0	0	0	0	0	0	4.33432	4.19515	4.32172	0	0	0	0	0	0	0	0	0
KchainBiClust_12668_1_ClustSize_1934_seq0_01__1	CTGATAGATCTTTGCACTACAGGGCAGTTAAAAAGAATGGTAAATGCAAGAAA	0	0	0	0	0	0	6.48525	6.53959	6.48418	5.48521	6.10345	6.02828	0	0	0	1.09861	0	0.693147	6.87523	6.85129	6.88714	3.07731	2.82138	2.97553	0	0	0	0	0	0
KchainBiClust_14106_6_ClustSize_84_seq0_03__1	GTGACCGTAACTAGTAACCAACAACCTTTGGAATCCCTTTCTGCAACTAATCCACACTGATGGATTCTAAACAACCCTCGACATTAGTTTCAAGCAGACTCGTTATCAGATCGGAA	0	0	0	0	0	0	5.94498	6.03508	5.98436	6.42352	7.15637	7.13083	0	0	0	2.86695	2.02595	2.80336	6.22274	6.11258	6.28305	3.62878	3.62434	3.7156	0	0	0	2.54375	1.94591	2.32949
KchainBiClust_30380_1_ClustSize_12_seq0_07__1	TGAGAAAACTAGCAAGATAACCCTGTGAACAAACCAGGTCCCTTCTTGAGAA	0	0	0	0	0	0	4.72928	4.67849	4.84867	0	0	0	0	0	0	0	0	0	6.78768	6.72538	6.76964	0	0	0	0	0	0	0	0	0
KchainBiClust_21914_6_ClustSize_3_seq0_03__3	CTTGCAATCAGAACTTATTCGGAAACTATTTATTATCTTTAAGGGCAAGGCAAGG	0	0	0.523248	1.33977	1.02962	1.25846	8.81308	8.80838	8.79169	0	0	0	0	0	0	0	0	0	6.55916	6.47739	6.53709	0	0	0	0.593062	0	0	0	0	0
KchainBiClust_14330_1_ClustSize_3_seq0_03__2	TCGTCCATTCTGCATGTTTAAACTGAAATCATCGCCCTCTTATCCTCATTGTAATATTCCCTGCCCAGCACACGCCCATCGTCC	0	0	0	0	0	0	6.84801	6.8633	6.7449	2.21193	2.48238	2.3896	0	0	0	0	0	0.693147	6.31344	6.29028	6.31618	0	0	0	0	0	0	0	0	0
KchainBiClust_8965_1_ClustSize_977_seq0_01__1	CCTGGTGCGTGAGAATAATGCCTAGTGCGATGCCAGATGCATCCACATGAAAAGGCTTGTTCCAATCTGGAAATACCA	0	0	0	0	0.593062	0	8.48241	8.50099	8.52047	2.03688	1.04982	0.952009	0	0	0	0	0	0	3.48724	3.65573	3.69322	0	0	0	0.902869	0	0	0	0	0
KchainBiClust_27129_2_ClustSize_963_seq0_01__3	AATATTAACCCATACTAAAAATAACAATCAAACGAGGGTTACAATCTCCCAAAATTGTAGGGGGAAGTTAGAAATTCCGACGCATATAAAGTCTGAATTCCATAAAACT	0	0	0	0	0	1.17865	8.33027	8.26782	8.32	0	0	0	0	0	0	0	0	0	3.03735	2.83908	3.11795	0	0	0	0	0	0.693147	0	0	0
KchainBiClust_22353_0_ClustSize_75_seq0_03__1	GATATGGGGTGGGAAAGTCGCGGGCCTTAAGCCAAAGAGACAGATGCTCTAATCCCCTCAGCTCAGTACTGCGGGGGTAGGAGCAGAAATCTGTCTCTTCGGACATAGTTTAAGCGTAGTAAGG	0	0	0	0	0	0	8.00773	8.02396	7.90739	0.606134	1.71172	1.75786	0	0	0	0	0	0	7.69244	7.60965	7.65386	0	0	0	0	0	0	0	0	0
KchainBiClust_24210_6_ClustSize_3_seq0_03__1	TGACAATTCATTAATCTTCGCGGCAATCTGGTCAAAGAGCACGAAGAAAAGCAATATGTGTAAAAGATTTCAAGATTGC	0	0	0	0	0	0	6.54039	6.49174	6.52483	1.40282	1.29928	1.09861	0	0	0	0	0	0	6.17552	6.17979	6.18649	0	0	0	0	0	0	0	0	0
KchainBiClust_14107_4_ClustSize_845_seq0_03__1	ACTGGGAATACTGCTAGGCTGACCATGTCTGAGCTGGAGAAATGGTACACTAGAATGAAAACAATGCTACTGAGTGTGGTACCAGAGGAACTGATACACTGGAATGAA	0	0	0	0	1.67398	1.79176	9.22136	9.21971	9.16364	0	0	0	0	0	0	0	0	0	9.67823	9.59159	9.67852	0	0	0	0	0	0	0	0	0
KchainBiClust_9270_1_ClustSize_6268_seq0_01__1	ATAATTGTTGTAATTGAATATCTTGGCCTGAATGTGGTGTTTCTTTTTCATTATTGACAATCTTGATTATTCCAGTCTTTTCATGAGATTTTAG	0	0.777704	0	1.47085	0	1.37148	9.48965	9.49923	9.5417	0	0	0	0	0	0	0	0	0	8.80029	8.86991	8.80178	0	0	0	0	0	0	0	0	0
KchainBiClust_9270_0_ClustSize_6268_seq0_01__1	TGATCTTCTGTATAATTGTTGTAATTGATATCTGGCCGTGAATGCTGGTGTTTCTTTTTCATTATTGACAATCTTGATTATTCCA	0	1.31432	0	0.441836	1.54045	1.93836	9.56257	9.57529	9.60189	0	0	0	0	0	0	0	0	0	8.81594	8.90649	8.8298	0	0	0	0	0	0.693147	0	0	0
KchainBiClust_32295_0_ClustSize_380_seq0_03__1	GATCTCTTATGCAGTAAGGAAGGTATCTATTCTTTGGCAAGGAGGGAGGTATGAGAAGAGAAAGAATATGCAAACTCCGATTCTCGTATGATGAATACAAGTT	0	0	0	0	0	0	4.50183	4.39893	4.34616	5.85455	6.53696	6.52676	6.04047	6.01082	6.10804	7.45261	7.31467	7.3494	4.45435	4.19789	4.2614	8.4852	8.46942	8.47531	0	0	0	1.09861	1.23969	0
KchainBiClust_465_0_ClustSize_120_seq0_01__2	GTGCGAAAACTTGGGGCTTCCATGTCCGTCCGCGATAGGAACCGTGCAAGTGTGGGAAATTCGGGGTTTCCAGCCCCGGACGCGAGAGAACCGGTGCGA	0	0	0	1.81238	1.09861	1.13498	6.76773	6.83495	6.73188	4.33947	4.65924	4.68829	4.18035	3.95657	3.95124	1.90954	0.550044	1.09861	6.53516	6.41328	6.56229	2.56922	2.81466	1.90024	0	0	0	1.69168	2.00653	1.90707
KchainBiClust_9697_0_ClustSize_1207_seq0_01__1	CCTGTAAATGACAGGTGGGGAATGCTAGGTGTCAGCCCAGAGGGCAAATTTGTAACTATAAATAGAGCTA	0	0	0	0	0	0	7.20058	7.16927	7.18757	0	0	0	0	0	0	0	0	0	6.99957	7.02502	7.01845	0	0	0	0	0	0	0	0	0
KchainBiClust_20622_3_ClustSize_1513_seq0_01__1	CCCTCTATTCGTCATATGTTCCCGTGGCTATCATAGATGCATTCCCAAACGGTTATATAATAGTCCGTCCCATCCTTATGAGATTGGTGGATCCAAAAACAACGAATGCTTTCACACCATCAAAAGTTT	0	0	0	0	0	0	7.11422	7.07124	7.12586	4.70602	4.06044	3.94696	4.1325	4.01938	4.04694	1.83702	2.25785	1.78129	6.80566	6.80585	6.79862	2.49412	3.14988	3.35574	0	0	0	0.830349	0.97345	0.927986
KchainBiClust_25615_7_ClustSize_1887_seq0_02__2	TGAGGAGATTATTGAACAAGCTTACAAAATGTTGGCACATAGACCACTTGCTAGGGTCTATGCTTTATACTTAAAAGATCAATGGTACAAATTTAACATTGAATGATACATATCTCTTATGAAGACGATTTCAAAACACTTGGAAA	0	0	0	0	0	0	7.30513	7.31733	7.2937	2.92998	4.14458	4.08061	0	0	0	0	0.646627	1.06784	7.06941	7.03783	7.05437	2.63906	1.55335	2.17682	0	0	0	0	0	0
KchainBiClust_7014_4_ClustSize_2147_seq0_01__3	GCTGAATTGCATACAATAACAGCTATCAATCATCAGCTAAGTTTAGTCCTTTTGAGGTTTTGTATGGACGAAAATGCAACACTCCTATCTCTTGGAGTAA	0	0	0	0	0	0	5.50601	5.37102	5.51879	5.28532	5.88934	5.95324	6.67182	6.6309	6.73122	0	1.0116	0.650589	6.53645	6.46835	6.52478	1.8589	1.52243	0	0	0	0	3.69304	3.70746	3.23541
KchainBiClust_8936_6_ClustSize_6_seq0_06__1	TGGGTTGGGTGGTCTTCCGACATAGTTGCACGGGTACCTTGCCTTCTTCCTTTCTGTGGTGCCCTCGCCAGCGTTATCATTTG	0	0.644356	1.30341	0.421214	0	0	5.02597	5.07261	5.05044	6.27331	6.5176	6.44073	2.42775	2.65592	2.25606	6.32591	6.23904	6.31281	4.88073	4.96348	4.94876	7.5123	7.53223	7.4886	0	0	0	2.30259	2.21817	2.22216
KchainBiClust_15881_2_ClustSize_1332_seq0_01__1	ATATATACGATCAACCTTATCATATAACCCGGCGTCGAACATATATATCAATGCAAATAACCCTCGGTGATAAAATTTAA	0	0	0	0	0	0	5.96405	5.93417	5.92207	6.00006	7.16746	7.09318	3.55535	3.37666	3.55794	6.04307	5.95183	6.03396	5.22428	5.22526	5.38741	7.78095	7.78531	7.77752	0	0	0.693147	3.06805	2.95396	3.41623
KchainBiClust_2537_1_ClustSize_86_seq0_03__1	TATGAGTCATCCCAAAATAATGTACCAGTATATTTTTTATGTATTAGATCCCCCTTCTTGGGACTAATTGTTATGTA	5.35053	5.40282	5.48855	5.11537	4.93515	4.96175	4.44925	4.28445	4.46591	6.71045	7.12145	7.07853	5.99552	6.0685	6.04278	4.77964	4.75548	4.56337	5.33964	5.32286	5.36612	5.56775	5.55247	5.56918	6.30434	6.24471	6.29561	4.27144	4.33729	4.32785
KchainBiClust_8173_3_ClustSize_3_seq0_01__1	TATCTTGTGACTGTTTGAGCGAGTTGGAAAGGTCCCTTGATAACTATAAGTGTCTTAAGTACTAAAGAGGTAGTAACGCACAGTCGCTGCGGCGAGAGCAGACTGCGTTACT	4.9696	4.82982	4.83628	0.693147	1.09861	0.659244	7.86057	7.80072	7.88315	6.8647	6.85066	6.77553	5.57131	5.44855	5.46785	5.09633	5.02596	5.07385	7.37116	7.35559	7.30607	5.97301	5.92959	5.93573	0	0	0	7.70107	7.62546	7.71833
KchainBiClust_3424_0_ClustSize_480_seq0_03__1	TTGGAATGGTGGATTAGGGAATAGGTGCACCTCCCTGAATGGCACTACCTGACAAGCACTATGTGTCCGGCGCATGATCCTCTACAGGTGCA	1.25276	1.42712	1.80098	5.88688	5.9183	5.94818	7.882	7.85742	7.88737	7.66437	7.9248	7.96738	6.39257	6.35195	6.411	7.24858	7.18197	7.24704	7.05517	7.01231	7.02058	8.61543	8.55666	8.59461	0	0	0	5.94861	5.86268	5.89685
KchainBiClust_14330_0_ClustSize_3_seq0_03__2	TCCTATTCTGCATGTTTAAACTGAAATCATCGCCCTCTTATCCTCATTTCCTTTGATACTCTATGTAGTATGTAACGAAATATCAGTCATGTTATCATTTCTCACAACATTTTTATTAACTAAATAAAACAATTAACTT	1.47018	1.39813	0.906721	2.11626	1.81645	2.22708	6.54833	6.59633	6.54942	4.32615	4.17118	4.23642	5.24196	5.25645	5.26248	2.75061	2.83027	3.16854	6.0664	5.96715	6.02687	4.3843	4.30758	4.18768	0	0	0.213578	1.33829	2.01172	1.48948
KchainBiClust_624_2_ClustSize_1117_seq0_01__1	GCTCCAATTTCCAAGTCCTCGGAATGAACCAAGATACAAGCATATACGATTCT	0	0	0	0	0.538999	0	7.28114	7.30365	7.30878	4.10951	4.67516	4.86753	0	0	0	0	0	0	7.62056	7.61248	7.64536	0	0	0	0	0	0	0	0	0
KchainBiClust_30150_0_ClustSize_251_seq0_02__1	CCACCGGCATAAGAGATTTATTTCCCTCATGCAAGTTTCCACCATATTAGATATTGAGTTATTATTCATTTCTCCGCCGAATGAGACCGACCTACACGAAAAAGTAAAGCCTAGG	0	0	0	0.628609	0	0	7.08787	7.07741	7.10566	4.83549	5.61167	5.64102	0	0	0	0	0	0	7.0563	7.04925	7.05402	0	0	0	0	0	0	0	0	0
KchainBiClust_18246_0_ClustSize_18_seq0_07__1	CCGTAGACTGGGTCTCCGATAATGAAGTCCTGAATGAACAGGTAGGGGATTGCATCGTCCCCAGACTGAGGTCCCAGATTGAG	0	0	0	0	0.59205	0	7.16535	7.11302	7.09387	3.24918	3.29027	3.70377	0	0	0	0	0	0	6.66592	6.73846	6.6359	0	0	0	0.494696	0	0	0	0	0
KchainBiClust_13084_2_ClustSize_30_seq0_03__1	ACCTTGCTGAATTTGGCTTTTCTAGAGAGCGACCTTGTAGATCGTGCCCCGCAC	0	0	0	0	0	0	7.39786	7.41265	7.43448	2.73944	3.51898	3.7013	0	0	0	0	0	0	7.08634	7.04167	7.05758	0	0	0	0	0	0	0	0	0
KchainBiClust_10471_4_ClustSize_61_seq0_07__1	TGACACATTGATCATTTATGGTTGTCTATGCGCCTTGACCCAATTGACATTGTAAGGTGAGGATGTGCATGCATAATAATCCTTATTTATTACTATG	0	0	0	0	0	0	5.70554	5.91889	5.75519	2.65541	2.14352	2.75457	0	0	0	0	0	0	6.43492	6.51489	6.46541	0	0	0	0	0	0	0	0	0
KchainBiClust_15324_1_ClustSize_1321_seq0_03__1	ACAAGAGATTAGGATGCCTTATCATCATCCAAATCACAAGAGTCCTTCTGACCACGACT	0	0	0	0	0	0	6.90655	6.84991	6.84662	2.07944	3.36384	3.04452	0	0	0	0	0	0	7.09581	7.04001	7.06553	0	0	0	0	0	0	0	0	0
KchainBiClust_1941_4_ClustSize_25_seq0_03__2	AGTGAAAGAGAAACAACATCAAAGCTCAATCAAGTTGGCAGTGCCTGGGTCAGTGATATTTCTGATGACTTTCATTGCTCCGTCAATGGGAATTTTAGTGAA	0	0	0	0	0	0	6.49426	6.54643	6.55156	2.71409	2.44956	2.79506	0	0	0	0	0	0	6.32451	6.34432	6.35219	0	0	0	0	0	0	0	0	0
KchainBiClust_614_2_ClustSize_3381_seq0_01__1	AGAAAAGGGCCTCCTTAATCGGATTAAGAATTAGTTAGAGAAAAATGAAAATATATGGTATAAGCAATGACATATTAACCTAGTGGTAAGATTCTGA	0	0	0	0	0	0	6.73039	6.80553	6.71894	6.82979	6.63895	6.6896	2.26868	2.07944	2.3394	5.43475	5.49548	5.44775	7.12267	7.08072	7.10651	6.76964	6.79221	6.80481	0	0	0	2.56975	2.97793	2.75777
KchainBiClust_11788_2_ClustSize_70_seq0_03__1	GACATTGATCTTTTCTGAGCATTATTGATATCATTTACTGGCACGTATTCATCTTCTAATGTAATAGTCTTGAGTATGATGGTTACATTGCTTTGCTACAACACTACTCTGTGATAATTCTC	0	0	0.879249	2.60022	2.52	2.47894	7.91881	7.8905	7.87394	7.61825	7.64564	7.65602	4.85676	4.764	4.90845	6.56707	6.60539	6.57856	8.28108	8.25826	8.22467	7.93527	7.94046	7.95254	0	0	0	3.67503	3.74833	3.50255
KchainBiClust_16252_1_ClustSize_8_seq0_03__1	CCTCGATTCATTCAAAACATTGCCACGACTCCTTCCTCGGACATCCTTGTGCC	0	0	0	0	0	0	6.86493	6.86506	6.80284	7.40676	7.62208	7.59494	3.08066	2.83855	2.84723	2.9245	3.0851	2.95442	6.72152	6.69134	6.70103	5.12963	5.12732	5.242	0	0	0	4.55519	4.25249	4.49517
KchainBiClust_2656_2_ClustSize_217_seq0_03__1	ATGACGCACTAGGTCATGATGACAACACTTGGTCATAATGACGGTACTTGCAACGGTCATG	0.693147	0.510828	0	0.725939	1.52243	0	7.57528	7.58513	7.56556	7.24086	7.28465	7.32211	2.54553	2.67759	2.15722	5.91418	5.74252	5.78705	7.86902	7.87844	7.88965	7.49613	7.51502	7.54107	0	0	0	2.60639	2.37079	2.58776
KchainBiClust_8572_0_ClustSize_347_seq0_03__1	ATGGGTAAAGATAGTCGTTGAGGCACAAAATGGTAGCAAATGTCAACTCGGTAAGTCGCAATTGAGGGGTTGACAACCCAGGGTGAGTGTGTAAGAGCTGAAACTAGTCATCGAA	0	0	0	0	0	0	7.33861	7.29059	7.31717	0	1.97606	1.07264	2.02438	0	1.33123	3.70225	3.54921	3.23111	5.99021	5.92693	5.92616	4.27369	4.20042	4.02663	0	0	0	1.29277	0	2.05229
KchainBiClust_1034_0_ClustSize_771_seq0_01__1	GCCATGAAATGAGACACACAGGCCACCCCTGGGGGGATGGGGTATGGGCGCTGGCTAGCCCACTTGCTCTCGTTTAAAA	2.15598	2.79506	3.05742	2.92512	2.63254	2.83855	4.99721	4.85416	5.09542	4.92395	5.17358	4.89376	6.6445	6.66707	6.69332	5.36044	5.28873	5.2277	4.90864	5.09487	5.07631	6.66313	6.7791	6.67536	0	0	0	3.20791	2.84913	2.9866
KchainBiClust_21943_2_ClustSize_2677_seq0_01__1	AGCACAGTATTCCGATCAACAGCATGCAACTCAAAATACTAATTTGATTACTCATTTTGACAGACAGGACTCACGTTTGCCTTCACATGTAAACAACAGCCTCTACCTGATCCCTCTTGGAAATGCGAGGCTTTCTTATAGCATTCGCCTTTC	0	0	0	0	0	0	6.64589	6.57626	6.63413	6.39411	6.89006	6.89615	0.693147	0	0.597836	4.84297	4.80905	4.8078	7.00418	7.05186	7.02833	6.63312	6.64799	6.68047	0	0	0	0.980831	1.44238	0
KchainBiClust_12668_3_ClustSize_1934_seq0_01__1	ATTCTAAGGGAGGAAAATAAATATTGCTTCAAGAAAGATGGGAAGGAGTACATTGTTCGTGCTCATCGCATGAAAACTGACAGGTC	0	0	0	0	0	0	6.11832	6.13166	6.07466	5.64509	6.40919	6.38249	0	0	0	3.45947	3.24649	3.27336	6.66083	6.67013	6.68835	5.21765	5.13403	5.06323	0	0	0	0	0	0
KchainBiClust_159_0_ClustSize_3_seq0_06__1	AACAACAGCAAAGCCAGTCACGAGTCGAAAGATATCCGAACAAGTCGATACAGGCAGCCCTCCACCTTTCAAGCCGCGCATCGAGATAACCGAGGGAAGTATGCCACCTGCGGCAACCTCCATG	0	0	0	0	0	0	5.14147	5.12377	5.2421	7.08616	7.33307	7.35356	5.43301	5.46446	5.47886	5.03578	4.96078	5.06963	4.87031	4.84471	4.80644	5.55702	5.64909	5.51131	0	0	0	5.19977	5.18095	5.16329
KchainBiClust_29883_1_ClustSize_161_seq0_01__1	TGAGTAATTGGGATTTAAAAAAGAGTTATGATTTCAGGGCATCGATATTCTTTCACATTTAAGAGATTATTAAAAGTCTTGGAGCTTTTTACTGTTTC	0	0	0	0	0	0	4.7362	4.71578	4.69015	6.16075	6.7293	6.71749	5.36263	5.40515	5.41521	4.24414	4.25222	4.17305	5.10542	4.92914	4.99368	5.6852	5.64329	5.60979	0	0	0	4.30193	4.5088	4.38203
KchainBiClust_4556_2_ClustSize_21_seq0_03__1	ATGGATGAACTCCAAAGTGGTCCCCTTATGGTGAAATCCCTCACAAGAAGAGCTTTG	0	0	0	0	0	0	5.42636	5.58755	5.61327	6.7233	7.36328	7.42421	5.20554	5.18043	5.15468	3.68988	3.5644	3.70018	6.08823	6.01459	6.08768	4.80216	4.65396	4.80081	0	0	0	5.28895	5.09252	5.09645
KchainBiClust_5001_1_ClustSize_3_seq0_06__1	TGCATGGCCCTAAACAGCTGTGTGGGTCGCTCTGCAAGATTCCACCGTCGGAATCTGATGAAAACTGGCTCAATGGAAGCGCCCT	0	0	0	0	0	0	4.8022	4.75433	4.86776	6.28364	6.66401	6.75063	5.98621	5.98645	6.04663	4.81813	4.76231	4.81137	5.42092	5.35548	5.32274	5.65553	5.61471	5.64993	0	0	0	4.30243	4.17535	4.23367
KchainBiClust_18242_4_ClustSize_256_seq0_03__1	AGAGATGACTACAACAATACCATGAAGCCAGATACAGCCAGGGAACGAAGGAAGGCGGAAGAGAT	0	0	0	0	0	0	6.84657	6.92186	6.81163	6.38072	6.53233	6.46358	5.40605	5.46574	5.43808	2.45959	1.7492	2.55334	6.72131	6.72767	6.70319	3.54385	3.59594	3.69759	0	0	0	1.62924	2.52972	2.23001
KchainBiClust_29948_0_ClustSize_138_seq0_03__1	GGAATTTATTTTTCGAATGACTTCTTTTACAACATTACTTTGCTAGTCCGTTAACATCCATGGAAGTGAGTTTATATTAATTTGCTCT	0	0	0	0	0	0	6.71125	6.69456	6.72631	6.02377	6.1036	5.99396	6.93984	7.02186	7.03615	3.31054	3.39003	3.7643	6.43818	6.43764	6.42972	4.73561	4.92822	4.79579	0	0	0	4.08317	4.28863	4.14946
KchainBiClust_22142_0_ClustSize_34_seq0_10__1	GTTACCCTTCTTCGCTTGTGGTTGGGACTGGTTGTCCTTTCCCTTGCCCTGCTTCTGCGCAGGTCCGAAGTCAGCTCGT	0	0	0	0	0	0	2.72692	2.60796	2.5371	4.82085	5.30544	5.17292	5.16192	5.14708	5.14542	0	0	0	2.37279	1.40399	1.90617	0	0	0	0	0	0	7.19272	7.22147	7.20537
KchainBiClust_5959_2_ClustSize_41_seq0_03__1	CTGGGTGAACTGGTTGCTCGAAGTGGGTTTTTGACCAACTATAGTCACTTAATCCAAAACATGGTTTAATTAAGCACATGG	0	0	0	0	0	0	6.62694	6.54559	6.49791	7.35713	6.67013	6.72463	3.91867	3.83945	4.08317	0.606134	0.641854	0	6.05815	6.14311	6.04658	2.00373	0.980831	1.45225	0	0	0	2.7191	3.24843	2.62104
KchainBiClust_16600_8_ClustSize_13_seq0_06__1	TATGGGGAGGGCCGCCATCATGCGCAAGCAGGCGAGACCAAATAGAGAGGTACGAAGTACTGAGAAGCTAAGACTCTAGAGGGCAGACGGTTCTTACTGGGGCAACCCTGGAGC	1.53533	1.51983	1.53533	1.59686	1.94591	1.56563	4.65059	4.46048	4.56067	6.35253	6.53789	6.47733	5.10238	5.08905	5.15736	6.35109	6.3024	6.26675	4.24344	3.98023	3.93528	7.68292	7.68516	7.71871	0	0	0	3.29366	3.10432	2.63062
KchainBiClust_14810_2_ClustSize_1689_seq0_01__1	ACCCATCGTGAAAGAATACATCTCCTGGCCGCCCACACCTTCGAGTACTTCATCAGTAAATGGGG	0.693147	2.00976	1.29928	3.92263	3.76738	3.68888	7.2533	7.27981	7.2658	7.31275	7.36085	7.31239	4.40241	4.29207	4.41204	5.99073	5.91747	6.01702	7.43081	7.47617	7.45788	7.49456	7.52681	7.48347	0	0	0	3.60133	3.70541	3.76937
KchainBiClust_800_2_ClustSize_3_seq0_06__1	TTAATGGCAAGCTAGAGATCTAAAGTTCAAACCAAAGCGGAGTCGCCAAAAACTGTTGGCTCGGTTTTGCAACCAAGCTTAGTGCTATGGGCACCTACTAACTAGTAGTAG	0	0	0	1.37055	1.79868	1.8045	5.71271	5.76184	5.71203	3.8925	4.64472	4.58329	4.09601	4.09767	4.26549	7.52916	7.46943	7.51615	5.65925	5.5927	5.67321	8.11401	8.09961	8.12489	0	0	0	3.28854	3.33944	3.48359
KchainBiClust_2445_2_ClustSize_47_seq0_03__1	TTATTGTGATCTACGAATGGGGGCATTCTCACTTGGAGTGGAACTGTGGCC	0	0	0	0	0	0	3.00478	3.07438	2.87766	2.82785	3.00253	2.85699	2.54731	2.19192	2.19722	5.87289	5.91987	5.88951	3.17805	2.99573	3.12156	6.77589	6.76797	6.82091	0	0	0	3.11554	2.78949	3.23983
KchainBiClust_747_1_ClustSize_3_seq0_06__1	ATGATATAGAGAGGTTAGAGATAACTGTGATGTACATATGATACGAGATTG	0	0	0	0	0	0	4.90087	4.92929	4.99126	2.73302	3.30567	3.34138	1.16761	1.58924	1.63864	5.6394	5.53216	5.60959	5.42107	5.26547	5.34099	7.01542	7.11555	7.05158	0	0	0	2.25129	1.54045	1.70475
KchainBiClust_21496_0_ClustSize_1012_seq0_01__1	TTTCTCGGGCTCATCTTTCCATTATCTTCGCTAGTCGTTACTTCTCTTTCTCGCGTCGCTGGGCTCCCATGCACCCACTG	0	0	0	0	0.624156	0.693147	8.67555	8.6889	8.68337	7.60861	8.0215	8.03879	0	0	0	0	0	0	8.14328	8.12616	8.14356	0	0	0	0	0.944462	0	5.94157	5.95116	5.87362
KchainBiClust_5959_1_ClustSize_41_seq0_03__1	GGCGCACCAGCAATAAATGAGGGCGCACTTGTGGCAAAACGGAGGCTGGGTGAACTGGTTTGCTCAGAAGTGGGTGTGAACACTCTCA	0	0	0	0.693147	0	0	5.58875	5.62438	5.64297	6.63555	5.95713	5.95376	1.60944	2.68785	2.76632	0	0	0	5.31959	5.27607	5.38862	0	0	0	0	0	0	1.02962	0	0
KchainBiClust_8936_0_ClustSize_6_seq0_06__1	TACCTTGCCTTCTTCCTTTCTGTGGTGCCCTCGCCAGCGTATCATTGGTTTCTTATCCCCCTTACTCTTCTTGC	6.32539	6.31408	6.31335	4.71385	4.46207	4.5808	6.40106	6.37269	6.42313	6.08753	5.95161	5.97013	6.05409	6.03637	6.07713	6.5809	6.53347	6.55092	6.37692	6.31837	6.38906	7.69245	7.66528	7.66948	2.87332	2.82583	3.06704	4.83097	4.66971	4.78254
KchainBiClust_1803_3_ClustSize_3_seq0_06__2	TGGGGAAGTTGCAAAACCAACTTCAACTAATCCCAATTCATCAAATTAATATTTTTTGTTACATTTTAAGATGTGCGCGAGTATTTCATAGTAGAGTA	0	0	0	0	0	0	3.36994	3.19238	3.00149	1.94591	1.82589	2.1883	1.24079	1.92789	1.8589	7.01667	6.92283	6.88138	3.62992	3.82653	3.70002	6.65911	6.60599	6.60887	0	0	0	4.62897	4.47095	4.52266
KchainBiClust_8902_1_ClustSize_3_seq0_06__1	CAGTTGAGTGATAGGATTTGCAATTGTTCTTGTTCGTGATTGAACATGACTGAATGGAAGGGATGGAAG	0	0.693147	0	0	0	0	3.87714	4.04305	4.03745	1.59913	1.55429	1.33181	6.10664	6.0285	5.98355	7.43814	7.44689	7.44582	3.48809	3.57655	3.30525	7.89167	7.88209	7.89583	0	0	0	0	0	0
KchainBiClust_216_0_ClustSize_3_seq0_06__2	AAGATGCAGGCCCCGCAAGGAAGCCACAACAAGTGAAGAAGAGTTCTCTTTCAAAGCGCCTCCCGAGATGAGCTTCGCTACACTTACCGCTCATGTGCTACCAAGCAA	2.95936	2.5337	2.92829	1.05315	0.959775	0.732887	3.09453	3.39323	3.28185	1.8877	1.82455	2.12026	4.63924	4.60241	4.62846	6.66829	6.57031	6.59715	3.4761	3.38811	3.53169	7.09693	7.10615	7.119	1.90166	2.65541	2.81704	1.94591	3.10673	3.09104
KchainBiClust_14725_3_ClustSize_1013_seq0_01__1	TCTCACAGAGAGCCTTCAAATACACCACAATCCTCGCAATTGCAGAAGACTTTATGAACTAAAAAACCAAACTCACCAACATCTAGTGGTTTGAATTGTATAATGTCTCC	4.95802	5.00227	5.01197	2.3097	2.18926	2.84574	7.36035	7.37991	7.35072	7.13155	7.7074	7.70163	4.56239	4.46447	4.59132	6.51304	6.35209	6.47697	7.64042	7.593	7.59937	7.9572	7.99518	8.00447	0	0	0	3.07385	3.59044	3.41773
KchainBiClust_20710_0_ClustSize_3_seq0_03__1	TGCGCAGCGTACCCGACGTAGCCTCAGAGTTAGGCAAAAAATCTGGGTCCTCCAACCTTGGTGAAAAA	3.69138	3.83531	3.93183	2.2489	3.29584	2.32239	7.98359	8.01397	7.99906	7.30644	8.09632	8.09186	3.83719	3.85071	3.7871	4.14496	4.13547	4.24133	8.58167	8.5506	8.56871	5.33763	5.34594	5.39293	0	0	0	3.38819	3.69898	3.6399
KchainBiClust_18_1_ClustSize_3_seq0_04__2	ACCTGACTATTCCACTGCAACAACTGAACGGACTGGAAACACTGGTCATAATCATGGTGGCGAATAAGTACGCGTTCTTGCAAATCACCAGAAGGCGGTTCCTGAATGAATGGGAAGCCTTCAAGAGGTGA	0	0	0	0	0	0	5.42821	5.12382	4.80981	5.78931	6.43121	6.45643	1.33123	0.656779	0	7.02577	6.96969	7.01801	4.40968	4.33649	4.25907	8.23224	8.2328	8.25154	0	0	0	0	0	0.693147
KchainBiClust_16330_3_ClustSize_6_seq0_03__1	AATGCTCCTTTGATGAGATTGATCATTTCAAAATGTGAATCATAAACATTAAAATTCGAGCTAATTAAAGAACGAATATGAGATGTAGAACGTTTGATCTCCATAAAA	0.693147	0	0	0.693147	1.17865	0	6.89467	6.90156	6.88817	7.07918	6.80525	6.77222	5.74373	5.80212	5.83912	4.87265	4.90809	4.75392	6.62804	6.6403	6.59456	5.48894	5.35876	5.56235	0	0	0	2.7213	2.32456	2.14658
KchainBiClust_297_2_ClustSize_3_seq0_06__1	TTTGAAAACTGCAAAGTTTCACTCCTCAATTTTGCCTTTGAAACTTTCGGATTCACTGGACGTGACCCTGACTGGG	0.209718	0.470004	0.669049	0.8675	0.980831	0.781703	6.51697	6.49164	6.49164	5.65278	5.89954	5.89476	8.47189	8.47317	8.4715	8.17496	8.14602	8.17514	6.39392	6.44296	6.36554	8.67388	8.67722	8.68517	0	0	0	5.34012	5.24608	5.21808
KchainBiClust_12761_4_ClustSize_432_seq0_01__2	TGGGGTGGTGACACATCTCTTATGCATGTGGAATAAATTCAAAATACATGTTCTGCTCAT	0	0	0	0	0	0	5.82665	5.74727	5.7328	4.85376	5.45271	5.28405	7.27617	7.29758	7.33364	6.26011	6.24955	6.27424	5.84354	5.80497	5.74425	7.34816	7.32931	7.39974	0	0	0	4.19971	4.14402	4.23007
KchainBiClust_19642_1_ClustSize_274_seq0_01__1	TTGGTTAATTTGGGTACCGAGACAGAACCAAAATTTGTCACCTTGGAAATGTTGTTCACCAGGAGAAAGAGACAAGTTCATTAAATTGTTTAAACAGTACAAGGA	0	0	0	0	0	0	3.81331	3.22287	3.31419	4.03424	4.67842	4.75531	5.06133	5.0093	5.11439	5.59434	5.56107	5.45447	3.76584	3.88773	3.74005	6.49118	6.54477	6.46987	0	0	0	3.6763	3.79997	3.62434
KchainBiClust_22375_2_ClustSize_395_seq0_01__1	GACCATACCCACTGTAAGAGAGGGAGGGACGAGACGGAGGATCAACGACTGACTCCTAACGCGGTCCAGCATGAGCGATTCACTCCACCGATATGGTATT	0	0	0	0	0	0	3.63913	3.72923	3.50006	3.24113	3.42445	3.36119	6.09755	6.09384	6.18778	5.88414	5.93271	5.81466	3.1756	3.27004	3.27381	7.51313	7.49871	7.42396	0	0	0	4.79968	4.87385	4.88012
KchainBiClust_9416_1_ClustSize_13_seq0_04__2	TTCCGCGCGTGTCGACAATCAATCTATCTTCACCATACCAAGTTCTGCACATATATGATTTCCTATCATGTGTCTCAGAACCAAGTGGCTGCTCCACA	5.53841	5.49928	5.55659	5.58577	5.63121	5.70469	4.67763	4.59726	4.82953	6.65704	6.84884	6.85365	5.81431	5.88812	5.86561	4.62734	4.27582	4.71714	5.199	5.19312	5.25148	5.71133	5.69598	5.76841	4.06367	4.30856	4.47072	4.62497	4.73673	4.86823
KchainBiClust_9881_0_ClustSize_44_seq0_03__1	CTATGTATGTGCGCCTAACGCCAATATAATGCATATATACAGATGGAGAATCTATGCCTATCAATAAGAAATAGAAGGATATTTA	0	0	0	0	0	0	2.13614	1.86666	1.8718	6.93451	7.1485	7.12644	0	0	0	0	0	0	2.59525	2.81341	2.50144	0	0	0	0	0	0	0	0	0
KchainBiClust_1847_1_ClustSize_3_seq0_06__1	GTAGTGAGACCAGCTCCTCCAAACGCAGCGAATCCCTTCCAACACTATGTGCTCACAGCTGCAAATCCGAGCACCTATCACGCTAAGCTAAGTCCTAGG	0	1.60944	0.405465	0	0	0	4.41494	4.25427	4.29007	4.39856	5.22369	5.16087	5.74684	5.58783	5.53159	7.48486	7.41776	7.44302	4.83263	4.68262	4.66913	8.43461	8.43136	8.39283	0	0	0	6.81872	6.83414	6.81341
KchainBiClust_159_1_ClustSize_3_seq0_06__1	CATCTTCGTCCACCGAGGAAATGATGGGGGTTTTCTCTGGGAACCAAATCCAACAACAGCAAAGCCAGTCACGAGTCGAAAGATATCCAGAACAAAGTCGATACAGGCAGCCCTCCACCTTTCA	5.11209	5.06805	5.15662	0	0	0	3.69704	3.59542	3.76935	4.86475	5.22106	5.24469	6.6745	6.67547	6.67143	7.23735	7.18766	7.20413	3.49871	3.57422	3.43291	7.31002	7.2854	7.31476	0	0	0	7.30808	7.33268	7.31089
KchainBiClust_23321_0_ClustSize_3_seq0_02__1	GAGCAATCTAGATCAGGCAAGTGCTTTGAAACCAACCTGCTTTATATACC	0	0	0	0	0	0	1.45725	1.59601	1.75315	1.56862	2.28131	1.9113	7.62369	7.66142	7.66541	5.71208	5.70272	5.57973	1.6327	1.89712	1.60944	6.78951	6.82091	6.81952	0	0	0	6.9481	6.85952	6.97582
KchainBiClust_25347_2_ClustSize_3_seq0_06__1	CTAGAACTATGCAGCAGTGGACGACCGCCAAGCAGATCATCAGTCAACTGTGGTTGAGGTTGAAGGTAAGATTGCTAAGCAATCTGTTTCTATTTTG	2.40153	2.17853	2.30658	1.59021	1.56292	1.41227	3.12556	2.83784	2.90329	4.48546	4.94296	4.87321	4.47993	4.5006	4.45781	7.10912	7.07481	7.09851	2.6588	2.55723	2.4901	7.85303	7.844	7.83945	0	0	0	6.76184	6.72234	6.708
KchainBiClust_8153_4_ClustSize_3_seq0_06__1	AACGGTTTTTTGCATCGACAATATCCCTCTCCACACTCCGCCCGTTTACTATCTCGTTTCAATTTCTCGACATTATTGTCGCAACGTTCTATTACTAATTTGAATTCATTGTTTCTCTCTACTATTTAGAAACTTTAACATA	0	0	0	0	0	0	3.0665	3.23475	3.01431	1.65542	2.00148	2.35504	3.86223	3.87498	3.74132	6.43087	6.2974	6.38763	2.94444	2.73087	2.96306	7.39423	7.38096	7.33285	0	0	0	3.78986	3.87482	3.93318
KchainBiClust_8902_2_ClustSize_3_seq0_06__1	TCTTGCGAAGAAGATTGTTCTTGCAGTTGAGTGATAGATTTGCATTGGTTCTTCGTTCGTGATTGAACA	1.87692	2.04769	1.90146	2.42314	2.81954	2.81278	3.60202	4.26311	3.76849	5.29571	5.8764	5.84889	6.55582	6.57322	6.59271	8.13846	8.12021	8.12589	3.7273	3.79682	3.80036	8.39735	8.37743	8.41204	0.965081	0.371564	0	7.32631	7.31758	7.30884
KchainBiClust_3448_3_ClustSize_10_seq0_01__1	ATCTTGTTTGAGTAGCCTCATAAAACCTTTGGTAATTTTAGCGTAGTTTATGATAAATCGCCGTAAGAAATTGACATGCTTGCAGACTTTG	0	0	0	0	0	0	3.54385	3.46574	3.74084	6.25242	7.01056	7.0514	0	0	0	0	0	0	3.28591	3.34873	3.20275	0	0	0	0	0	0	0	0	0
KchainBiClust_9907_1_ClustSize_1121_seq0_01__1	TCTGAACAGTCATGACTCTGAACGGTCGCGACTCTAACAGTCTGACTAATTAAAAAAAACTTTAACGCAGA	0	0	0	0	0	0	1.40877	1.25276	2.05412	4.44905	5.95772	6.01104	0	0	0	6.72906	6.67914	6.74598	2.6897	1.8068	2.1347	6.06632	6.16542	6.07242	0	0	0	0	0	0
KchainBiClust_30232_1_ClustSize_47_seq0_06__1	AATGCCTCAGAAGTAGTCAACCACCACAAAATGTACTCAAACCTCGCTACCTTCTTTAGTTAAATGGGTTGTCTGTCACTCCTTTC	0	0	0	0	1.54045	0.839751	3.29012	3.31419	3.0091	4.74259	5.60679	5.53278	3.14878	3.09627	3.40917	6.84363	6.73244	6.71132	2.99188	2.89463	2.85337	8.04741	8.02877	8.06049	0	0	0	2.73437	2.55257	2.96448
KchainBiClust_23438_0_ClustSize_3346_seq0_01__1	TGACCTGATCCATATAACAACCCTCGATCAGGCCAGGGCAAGTGTGCCCGCAATGGGGACAAAGTGTGGC	1.25276	0	1.35455	0	0	0	3.67407	3.30235	3.42637	5.45381	6.87948	6.91596	1.09861	1.22723	0.597836	7.62413	7.67265	7.6602	3.31739	3.01322	3.03608	6.80702	6.7598	6.78106	0	0	0	0	0	0
KchainBiClust_8339_3_ClustSize_3_seq0_06__2	ACTCATAAACTGACTAAGCACACTCACTGCATAGCATATATCAGGTTTGATGTTAACAAGATGCATCAATGAGCAGTCTATGTCTATAAATATGTGGATCAATATCACCCAAATCGAAAGAACTCTGATTCGGTTTTTTCATATTCATCACCATTGGTGTAGGAATGGGCTT	0.405465	1.38629	1.34993	0	0	0.579816	3.9624	3.51012	3.61255	3.24807	4.08199	4.25347	1.02962	0.322772	1.07992	6.47969	6.38057	6.42125	3.24202	3.67207	3.69777	7.03236	7.07194	7.06502	0	0	0	2.42154	2.32525	2.84178
KchainBiClust_18505_1_ClustSize_1176_seq0_01__1	GGTTCAATCTTGACACCATTTTTCAAAAATTTAAAACAAGACCTCCCAAATACTTCAACTCTGCAATTTTTC	0	0	0	0	0	0	6.77033	6.79735	6.69349	5.66319	6.2235	6.25473	0	0	0	0	0	0	6.71425	6.62654	6.70971	0	0	0	0	0	0	0	0	0
KchainBiClust_12838_3_ClustSize_2275_seq0_02__1	CTTGACCCATGGTTCCATACCATTAGGGTCATTTCCATATCGATTGAATCCGTTTGTGTAGCCGCCCGTATGGAACCGTTGACC	0	0	0	0	0	0	6.46925	6.41092	6.39207	5.75545	6.0409	6.09254	0	0	0	0	0	0	6.80512	6.71637	6.7602	0	0	0	0	0	0	0	0	0
KchainBiClust_11339_4_ClustSize_153_seq0_06__1	TGTTGACATGTGTGTCCTGATGGCAATCCACATGATGAAGATGAAGTTATTC	3.15274	3.4838	3.36592	3.1619	3.19489	2.96756	6.89424	6.90568	6.86667	7.13035	7.88188	7.86648	7.71644	7.73898	7.75615	7.27404	7.24855	7.20786	6.96194	6.94108	6.93603	8.27831	8.28745	8.30034	0	0	0	7.06032	7.03734	7.07042
KchainBiClust_3929_3_ClustSize_939_seq0_01__1	AGTTGAGAGTCAGTCTAGCCTTAAATCAAGGAAAGAACTGAAGATAACTGAATGGTAGGTAAGGAAGGGCGCTTTCTC	0	0	0	0	0	0	6.70188	6.60304	6.68136	6.32675	8.13357	8.08907	0	0	0	0	0	0	6.69398	6.74727	6.80039	0	0	0	0	0	0	0.693147	0.538999	0.496439
KchainBiClust_24520_1_ClustSize_2032_seq0_01__1	TATGATGGAACCTCGTAATTGGAAAGCAAGGGGAGCATTTCTTGTTGTAGGCCTTGATAGGGAAATTTGTGACCTCGCTCTAGTAGGTTCAAATTCCCGT	0	0	0	0	0	0	7.30374	7.30343	7.32104	8.70238	9.10004	9.09887	0	0	0	0	0	0	6.83353	6.82337	6.78289	0	0	0	0	0	0	2.30259	1.9994	2.06897
KchainBiClust_30118_0_ClustSize_176_seq0_01__1	GAAAGAAACTAATCAAGTTCAGAAACCTATGGGAAGAATGTGTCCAAGAAGAAAGAATAGTCGTAAGAGAGGAGAATTAAT	0	0	0	0	0	0.593062	5.48728	5.61035	5.45737	6.56909	7.25807	7.21395	0	0	0	0	0	0	5.96973	5.92607	5.94709	0	0	0	0	0	0	0	0	0
KchainBiClust_3929_2_ClustSize_939_seq0_01__1	AAGATACTGAAGGTAGGTAAGGAAGGGCGCACTAAGCACTAGGAGGGCGCCTTTCTCATGCAGTAGGTGAAAGGAGGG	0	0	0	0.693147	0	0	7.34794	7.36363	7.36578	6.29607	7.80781	7.77622	0	0	0	0	0	0	7.05579	7.07994	7.03439	0	0	0	0	0	0	1.18958	0	0.613102
KchainBiClust_27095_3_ClustSize_1412_seq0_01__1	GTATTATATTATTGGCGAAACTAACTAGACCTTGCTTGCTGGGCACTATTTATTGAGGAATGTACTCCCCGGTTGGTGCCTGTTTACGAACCAGAAGAAAGAGACCGGCT	0	0	0	0	0	0	6.60421	6.56789	6.57582	5.36971	5.7549	5.71307	1.00552	1.76929	1.75786	0.510828	0	0	6.43337	6.49587	6.41815	0	0	0.405465	0	0	0	0.538999	1.26224	1.64866
KchainBiClust_19075_0_ClustSize_28_seq0_01__1	GCTGGCGAATACACCCCGGATAGAAAATGCACCGGGCAGGGCGGGCTGGATGGGAGTTACTGCCGGCTGGGATAAGAGGGGGGGCCGCGATATTGACCGAGCGAGAGCTGGTCCAAC	0	0	0	0	0	0	4.83071	4.57883	4.55808	5.63229	6.8445	6.81728	0	0	0	0	0	0	4.49981	4.43438	4.28909	0	0	0	0	0	0	0	0	0
KchainBiClust_19288_3_ClustSize_3_seq0_03__3	ATATCAACTTTCTATAGTTTGTGCATGCGTTTGACAAGAAGAATAGCTTAGTACCGCCCGTTTTTAAAAATGTGT	0	0	0	0.599622	0	0	7.46025	7.44136	7.45418	6.88851	7.41072	7.38642	0	0	0	0	0	0	7.78004	7.74961	7.77978	0	0	0	0	0	0.693147	0	0	0
KchainBiClust_15324_4_ClustSize_1321_seq0_03__1	ACAAGAGATTAGGATGCCTTATCATCATCCAAATCACAAGAGTCCTTCTGACCAACGACTAGGAAAATAAAATACCACACTGAAAAAGAACGAGACAAA	0	0	0	0	0	0.693147	7.14204	7.16345	7.19225	5.73628	6.50823	6.52822	0	0	0	0	0	0	6.64863	6.59329	6.62298	0	0	0	0	0	0	0	0	0
KchainBiClust_30380_0_ClustSize_12_seq0_07__1	TCTGCCATGCTTGACCTCACTCACAAGCCCTGAAGATACCCTGTGAACAAACCA	0	0	0	0	0	0.45676	5.18088	5.10933	5.2602	4.4732	5.78665	5.76456	0	0	0	0	0	0	6.70618	6.72051	6.72523	0	0	0	0	0	0	0	0	0
KchainBiClust_29483_1_ClustSize_1697_seq0_03__1	TTCATGTCTAGGCTCGACCATGAACTGACTCAACGTGCTTACTGCAAACAAA	0	0	0	0	0	0	7.67096	7.62942	7.64255	6.97583	7.15462	7.14148	2.20374	2.42185	2.33157	0	0	0	7.62835	7.64166	7.62608	0	0	0	0	0	0	3.61227	3.65325	3.56388
KchainBiClust_2564_2_ClustSize_564_seq0_07__1	GTATGATATGTATGAGATCTCGAGGATAACACAATGATGATACTAGTAAGCATGCATAGTGATCGAGGA	0	0	0	0	0	0	4.89644	4.86799	4.88532	4.15888	5.12634	5.0324	0	0	0	0	0	0	6.8093	6.74399	6.78172	0	0	0	0	0	0	0	0	0
KchainBiClust_13049_6_ClustSize_20_seq0_02__3	CTTCATGATGTCACTGCACCCTGTGGCGATCATGAGGAGATACATTCTGGAATAAATGCAGCAGCGGCGTACCACGATCTTTGTGAATCTTCGCGTGACAAAAC	6.6768	6.68072	6.72823	6.18208	6.20837	6.18986	5.31812	5.33272	5.14101	4.12713	5.81413	5.97635	5.81678	5.73657	5.83481	3.7612	3.63759	3.46574	4.15888	4.12713	4.17439	6.10702	6.1203	6.06843	5.41165	5.7301	5.56068	5.59181	5.52057	5.61596
KchainBiClust_15009_0_ClustSize_1758_seq0_01__1	TTTGCCGTTGCGACGCCCCAGCGTTCCTGCAATTTCTGTGGCAAATTCATCTTTTCTCCTGTTCATCCCATCGGCTATTATTTTAAACCTTTTAGCT	0	0	0	0	0	0	5.65541	5.55586	5.67447	4.67594	5.12793	5.11899	6.63013	6.62804	6.60089	5.69345	5.64013	5.63924	5.273	5.28489	5.28827	6.56538	6.61718	6.60856	0	0	0	5.05146	5.12198	5.21674
KchainBiClust_14247_6_ClustSize_3_seq0_07__1	TGTTGAGAAATTATTGCAGAACATGGACCTGAGATTAGGGGAAAGTTGGGCTTATGACCCGCGGGAAATAATTTCAAATAAAAGAAGAGG	0	0	0	0.593062	0	0	5.30561	5.38406	5.34083	0	0	0	0	0	0	0	0	0	6.75542	6.68048	6.77416	0	0	0	0	0	0	0	0	0
KchainBiClust_10360_0_ClustSize_1495_seq0_01__1	TTCTTTGTTACGTTTGCATTGGAGTTACACGCTGGATAGCAAGTTAGCAGATTCTAGACCTACGCTGCATGTTGATCGACCCGTCACGTGGACGCCTGAGCTAG	2.28238	2.27213	1.74047	0	0	0	2.6897	2.54375	2.1454	4.86543	6.66058	6.68847	0.641854	0	0	8.85152	8.75201	8.78475	2.50738	2.3896	2.23683	8.03463	8.01147	8.03534	0	0	0	0	0	0
KchainBiClust_9907_2_ClustSize_1121_seq0_01__1	CATGACTCTGAACGGTCGCGACTCTAAACAGTCATGACTAATTAAAAAAAACTTTACGCAGAT	0	0	0	0	0	0	2.72458	2.55204	2.87168	3.66783	5.53273	5.41462	0	0	0	9.00034	8.92371	8.96863	2.71359	2.03688	2.04769	8.25114	8.23016	8.24807	0	0	0	0	0	0
KchainBiClust_14090_0_ClustSize_5565_seq0_01__1	CCTGAAGAGATAGAAAGAGAACATATACCAGAACCTAGCCCTTCACCTAATCTGATTCAT	3.30403	3.32424	3.26023	0	0	0	2.67644	2.70434	2.96183	5.04163	6.53452	6.56386	0	1.25276	1.57818	8.27929	8.30616	8.24677	2.09323	2.4987	2.64302	7.46861	7.46807	7.48583	0	0	0	0	0	0
KchainBiClust_866_1_ClustSize_44092_seq0_01__1	GCCAAACACAAAACTCATCCGCGAGTTGGGCGCCCCGACGCAGCGCAAGGCACATCCGCAAGACACGCAACGCAAGATGGGCGGCCAACGCAA	0	0	0	0	0	0	2.34341	1.71298	2.13021	3.72368	5.54355	5.5885	0	0	0	7.75862	7.69246	7.69405	1.34373	1.34373	1.50408	7.11721	7.10702	7.10092	0	0	0	0	0	0
KchainBiClust_6076_1_ClustSize_162_seq0_03__1	AATGATGAGGAACTACCACAGAATGACAGAAGCATTGATGACACGACTTGACCGCGAGAACGTTGGTTCTCAAGTCACTCAGTAC	3.55177	3.4095	3.04452	0	0	0	2.07944	2.06369	2.21784	4.38826	6.13786	6.06915	0	0	0	7.30233	7.34565	7.3371	1.981	2.35138	2.74486	6.52136	6.51286	6.49082	0	0	0	0	0	0
KchainBiClust_17777_6_ClustSize_1679_seq0_01__1	CCTTGGCCAAGCGAATTAATGCGCTATCCAGAGCCTTGGCTTGTGGGTCTAAGACGTGTAAAGATAATAGTATCAT	0	0	0	0	0	0	0.606134	1.25276	1.50408	3.37588	4.91815	4.88532	0	0	0	6.90241	6.82202	6.90625	1.40691	1.7492	1.27629	6.191	6.21327	6.23865	0	0	0	0	0	0
KchainBiClust_3885_1_ClustSize_31_seq0_06__1	AGTGCATATATCTTAGATACACTATGTTTCAATTCTGAATTCCCCGTGCTCGGCTGGAGGTGGACGCCACAAGATCCCACGCCATCCCATATACCATCAGAAACTATGGAAG	0	0	0	0	0	0	1.74297	1.72551	1.92529	3.65989	5.3933	5.2832	0	0	0	7.29675	7.29763	7.31636	1.83258	1.74297	2.10588	6.75494	6.74448	6.7981	0	0	0	0	0	0
KchainBiClust_6076_4_ClustSize_162_seq0_03__1	ATTAACCTACCTGCGGACGAGGTCATGACAATGATGAGGAACTACCACAGAATGACAGAAGCATTGATGACACGACTTGACCGCGAGAACGTGGTTC	0	0	0	0	0	0	2.8622	2.94444	2.92547	5.0187	6.83841	6.79066	0	0	0	9.98886	9.91938	9.92648	2.82053	3.4224	2.93689	8.88125	8.86807	8.85834	0	0	0	0	0	0
KchainBiClust_18790_1_ClustSize_3_seq0_06__2	TTTCAACCTTGATAATAATTTTTGAAAGAAGAAACTAGCACTCATATCAGCTCAAGTT	0	0	0	0.600774	0	0	2.05573	2.52127	2.59173	3.54417	3.97134	3.79549	0	1.09861	0	6.09733	6.14395	6.12274	2.08677	2.30845	1.8718	6.57925	6.62318	6.62	0	0	0	0	0	0
KchainBiClust_5649_0_ClustSize_1962_seq0_01__1	ATCAATTGTTTCACATTTGCATATGCAGTGGTTACACTCTGTCAATTTTATGACGATGTTTAGGCGGGTCCATTCTGAGAATTGCAAGCTAGCAGAGTTTGAAC	2.25438	1.60944	2.01882	0	0	0	2.68825	3.13549	3.22357	5.22036	6.94839	6.90055	0	0	0.693147	8.64267	8.62711	8.65866	3.5486	3.56705	3.51067	7.76831	7.75886	7.75251	0	0	0	0	0	0
KchainBiClust_7399_0_ClustSize_11_seq0_03__1	GTCTATATTCTCAGGCAGCCAGGTGTCTATACAGAAGCTGGGCAGACATCATCTCTAGGCTTAGTCGGGGAGGCATCCATACTACCGGGATTCATATTTACAGGGCTGACCATACGTCC	0	0	0	0	0	0	7.11635	7.05539	7.11043	5.30376	5.90573	5.83295	0	0	0	2.83648	2.3979	2.34181	6.87561	6.84501	6.83821	3.18596	3.34029	2.90042	0	0	0	0	0	0
KchainBiClust_3012_2_ClustSize_3_seq0_07__1	TTTGTTAAGGGAGATGAGATCGTTTTCGCAATCCTTTTCTGGTTCTAAGATTTTACTTGCAATTTC	0	0	0	0	0	0	5.33641	5.30691	5.31995	5.33301	6.10523	6.08896	5.36507	5.24922	5.39464	6.61454	6.59971	6.62993	5.71192	5.73872	5.669	6.57616	6.53375	6.58306	0	0	0	1.72969	2.03087	1.23837
KchainBiClust_26930_0_ClustSize_10_seq0_01__1	CCGAAAGAACCTTTGGACGAACAATGGTTTATATATTACCCGCACATCGCTCTCGTCGTAGATGTCCTAAATTGTTGATAATGTTAGGTGCTGGTAGACGTCGGTGTTGTAGGC	7.20373	7.1813	7.16755	1.86322	1.84845	2.45824	3.21084	2.85934	2.84491	2.44441	3.26175	3.08235	2.76662	2.41931	2.93436	1.30833	1.56862	1.50935	2.11816	2.37857	2.5337	2.8679	2.36556	2.77259	0	0	0	0.980831	0	0
KchainBiClust_5881_0_ClustSize_3_seq0_07__2	CACTTTGATATATGCTTCGCCCAGGTTGCGAAGAGTTCATTGGACAATGTCAC	0	0.446287	1.04982	0	0	0	3.56053	3.60042	3.73659	0	0	0	0	0	0	0	0	0	3.71634	3.81404	3.70968	0	0	0	7.53217	7.50489	7.57181	0	0	0
KchainBiClust_10424_1_ClustSize_2595_seq0_01__2	TATCTTTCAAAATGAAGAGCAACCAAGTGGACAGGAAATTAACGCACCAACTGTCCCAGCTACAGAGACAGGTAAAGAGCATGTAGCTCA	0	0	0	1.70475	0.693147	1.8718	5.9857	5.93384	5.96538	6.22673	6.40208	6.37161	6.31246	6.2118	6.22059	6.72851	6.62764	6.64157	6.35054	6.32597	6.43535	7.59398	7.57517	7.56253	0	0	0	5.96384	6.03213	6.05185
KchainBiClust_8067_1_ClustSize_4_seq0_06__1	AGTAAGCCAGAGAGCCTGCCAGCCAGTCTTTCAACTCTGCAATTCAATCTAGAACAGATAGGCAAGCTAGAAACAGTAGCTAGT	0	0	0	0	0	0	6.70506	6.72616	6.66561	7.62488	7.86774	7.85127	7.0467	6.9962	7.06918	8.10597	8.10873	8.09743	6.65423	6.59683	6.63371	9.45503	9.46115	9.43952	0	0	0	6.8577	6.86981	6.82629
KchainBiClust_27889_1_ClustSize_6_seq0_06__1	GTCTTCTTCATTAAAGGAAAATAACTTAAAACAGAGTATTCTCGGTCTTCAGAAATATAGCAGTCAATCCATGAAATCTAATCAAAATCTAGAGCTGTCTCT	0	0	0	0.906721	0	0.854415	0	0	0	2.61007	2.87168	3.16641	3.07137	3.20545	2.99811	5.56798	5.55315	5.56616	0	0	0	6.9505	7.00146	6.96952	0	0	0	3.81404	4.10382	3.65128
KchainBiClust_4278_4_ClustSize_65_seq0_01__1	TAAGGCACTATGGTCACCGCAATATAACCACTGCAAGTACCCTGTGCGATACCTAGGTAAGGAAACTATG	2.66517	3.01937	2.45022	2.91235	3.19238	2.72047	1.54881	1.3622	1.38629	1.49923	2.22462	2.37955	5.19763	5.15923	5.15888	7.41157	7.38406	7.3844	1.05605	0.767257	1.67398	8.24601	8.22753	8.25215	1.76359	0	1.60944	7.25152	7.2729	7.28319
KchainBiClust_19533_0_ClustSize_877_seq0_01__1	AACAAACGGGGAAATGGTTTATTCTTCTCTCACTAATAAAGCCATGGCAGCTTTGACTCTACAAGATTCTTTGAATAATACTACTGCAACATTGAAGATTGAGAGGGCCTCCTCA	0	0	0	0	0	0	0	0	0	0	0	0	3.83	3.75975	3.71965	5.9703	5.90519	5.96855	0	0	0	7.0976	7.03933	7.06881	0	0	0	3.27478	2.64795	3.2795
KchainBiClust_4390_1_ClustSize_14_seq0_06__1	ACTCATTGCTTGAGCCCAGCGCATTTTGAAACCATCCAGGAGTTCTTCACGAAATTCAAGTCACTGGTGCTTCAACTGCAACAATGTGGAATTGTTAAGAAGGAG	0	0.485508	0	0	0	0	0.916291	0.325426	0.693147	1.05861	0.659244	1.6514	4.1185	4.10894	4.01818	7.58146	7.60103	7.60005	0.916291	0	0.767257	8.64386	8.66479	8.67737	0	0	0	5.03881	4.98066	5.06373
KchainBiClust_4278_0_ClustSize_65_seq0_01__1	TCGATACTAGGTAAGGAAACTATGGTCACCGCAATATAACCAATGCTCAGGGGGA	0	0	0	0	0	0	0	0	0	0	1.94591	1.94591	3.88701	4.13564	4.06651	5.61549	5.51627	5.50198	0	0	0	7.07317	7.05129	7.09847	0	0	0	6.23637	6.10873	6.14419
KchainBiClust_4102_1_ClustSize_5224_seq0_01__1	AAAACAGATAATGAATGTATATACCATCGGACGATATTCATTTGATCCCCCATCCATGTGCCCATATTTTCTACAATGTTTGTAGTTTTGCTATTAAAACTCTTTCGGGACGTCTAGTACAACAATTTTTGCAAGGGCAATAACATTTACCG	0	0	0	0	0	0	0	0	0	0	0	0	7.56378	7.54721	7.55346	5.57469	5.59883	5.52457	0	0	0	7.16995	7.20042	7.20728	0	0	0	7.32266	7.33961	7.30137
KchainBiClust_25888_0_ClustSize_1364_seq0_01__1	AAATGGGTGTGGATTTCTTTCTACTCTTGGAAGAAACAGATGGAAAATGATGTTGTACTAATGGCCGATACTACAACATCCTCATCTCATTCTTGGACTGCATTAGATGGCAGTAAGATTGA	0	0	0	0	0	0	0	0	0	0	0	0	5.81711	5.7197	5.7476	7.10332	6.98879	7.0935	0	0	0	7.72398	7.73554	7.72145	0	0	0	1.17272	1.36524	1.51259
KchainBiClust_772_4_ClustSize_3_seq0_05__2	TATCATGCAATGTAGGACCTGAGATCCAGGGGGAAGGCACCGGAGGACACAACTCGCCCCTGAGAGACCAGCCGGGATGTCTCCTATCTCCCGGAGG	0	0	0	0	0	0	0	0	0	0	0	0	3.8908	4.06732	3.82864	4.40916	4.47961	4.48805	0	0	0	5.70511	5.74428	5.66781	0	0	0	6.64496	6.61049	6.62546
KchainBiClust_18161_0_ClustSize_3_seq0_06__2	AAATGAATAGCAAGGACAAGTAATCAGGAATAAAGCCAGGCTGGTCTACAAAGGATACTCACAAATTGAAGGACTTGATTATGA	4.85051	4.70691	4.90862	6.11576	6.03069	6.18014	4.6189	4.79211	4.76819	3.92249	4.11549	4.09039	6.787	6.74052	6.71089	7.82805	7.83505	7.82846	4.95728	5.0816	5.01654	8.13574	8.11541	8.12817	3.11352	3.12676	3.08073	7.85267	7.80829	7.83018
KchainBiClust_2537_0_ClustSize_86_seq0_03__1	TATGTATTAGATCCCCCTTCTTGGGACTAATTGTTATGTATATGTCTTGATAGAGCATGG	5.49614	5.55554	5.56192	5.22106	5.16171	5.25409	4.32273	4.33828	4.46277	6.59991	7.07514	7.04984	5.93072	5.98088	6.01918	4.38165	4.50418	4.27076	5.40432	5.28949	5.2702	5.539	5.57273	5.54636	6.34264	6.31355	6.23015	4.62455	4.60604	4.59775
KchainBiClust_14234_1_ClustSize_630_seq0_01__1	AATACAATGTGCTCCTCCCAACCGCAATCCGGATCGGAATCCTAAGCAGCCTAGAAATAATAACCTCAGAACAAACCACCCTTGTTCTATCTGC	4.94941	4.95934	4.85238	4.75789	4.8924	4.81218	3.83062	3.8375	3.98138	6.29761	7.2486	7.29234	5.64158	5.60413	5.6232	3.95037	3.92557	3.88531	4.72214	4.7302	4.88349	5.33819	5.37696	5.3325	5.64352	5.66343	5.60011	3.93361	4.04544	3.95995
KchainBiClust_9741_1_ClustSize_975_seq0_01__1	TAACAAGCATTGCATCACATATTATATCAAATTAACCTAGATATATGAGAAGTTCATATGTGTGCTTGGATGGAAGGGTTAACCATATCCTTGAATA	4.38292	4.40498	4.47734	4.39268	4.45102	4.33916	3.25535	3.37221	3.32195	5.69012	6.56707	6.51535	5.08407	5.01301	4.91476	2.81626	3.03427	3.26084	4.34658	4.17219	4.39357	4.66074	4.70048	4.82946	5.11542	5.0267	4.92984	3.65066	3.57755	3.39881
KchainBiClust_1232_2_ClustSize_3_seq0_01__2	GTTGGGGCCCTTTTGGCCGACTCCCCTTGCGTTCCCTATGGAAACCCCAAGTTTTTTCCCCACCGCGCCTCTGTCGTTGTTCTTTCGG	7.30242	7.44191	7.40792	0	0	0	0	0	0	0	0	0	0	0	0	0	0	0	0	0	0	0	0	0	2.61007	2.16715	2.35138	4.19373	4.25345	4.05978
KchainBiClust_23954_0_ClustSize_6_seq0_05__1	ATTATACAAACGAAATAACAACTACAAGCCTGTATAGTGTTCGATCCCCCGGGGTATCCACG	0	0	0.693147	0	0	0	0	0	0	0	0	0	9.26652	9.25887	9.25744	0.897943	0.492474	1.51413	0	0	0	1.84958	2.29422	2.11296	0	0	0	0	0	0
KchainBiClust_1232_1_ClustSize_3_seq0_01__2	TACATACTTCCTCTGAGAGGGTCACTCAACCACTGAACCGGCACACACTCACAAAAATCTTGCTGGGCAAAGCTTGGCACGCCAAGTTTTGGCGATCCAGAGGGGGATTG	6.72107	6.6751	6.70059	0	0	0	0	0	0	0	0	0	0	0	0	0	0	0	0	0	0	0	0	0	0	0	0	6.13054	6.08807	5.85553
KchainBiClust_15466_1_ClustSize_3_seq0_01__2	AAAACCTATACAGCTGACCTAAACCATATGGTTCCCAAAACCATGGGCTAGCACTCCACCACTAAAAACCTATAAATAGGTGATGGAG	0	0	0	0	0	0	0	0	0	0	0	0	0.693147	1.32176	0.777704	0	0	0	0	0	0	0	0	0	0.916291	0	0.693147	8.17269	7.99817	8.25262
KchainBiClust_12530_0_ClustSize_3_seq0_01__1	CCATGCCAAATAAACGATGTGATTTTGACCCTCTCAGCTGCAAACCTAGTTTAGATGAGAAGTGCACTAGCCTAACGAATATTTAACCCATAAGCAATAATAAGAAGATCATAAGTACGGGGGGAGTCTTCTTGATCCTGGAGGAAA	2.2192	2.40394	2.85503	0	0	0	0	0	0	0	0	0.597836	0	0	0	3.64443	3.64556	3.59074	0	0	0	4.86318	4.89166	5.03356	0	0	0	8.13357	8.15909	8.14071
KchainBiClust_18021_0_ClustSize_83_seq0_01__3	TTACAGACAAGGCATTTATTTCCGACGGGGACGAGATAGGGAGGATTACTAAACAGTTACAAGCGTATGGCGAAGTTGAAGAAGAAAACGTGTTCTATTGGTTTCACAACACGTTAATGGACGAA	0	0	0	0	0	0	2.00533	2.249	2.19192	6.57835	7.87295	7.88292	6.14707	6.14711	6.27639	0.719122	0.719122	0	1.95826	1.91832	1.11514	1.25276	1.27507	1.0033	0	0	0	0	0	0
KchainBiClust_20872_8_ClustSize_3_seq0_01__2	AAGCAAAATGAGTGTGGAGCTCGAAACCAACATAACCACAGTTTAAAGTGATTTTCTACATTTTATCTCGTGTAGGGCATTGTTCGTAGTCGTTTCTCGCATG	7.59944	7.90374	7.31204	0	0	0	0	0	0	0	0	0	0	0	0	0	0	0	0	0	0	0	0	0	0	0	0	0	0	0
KchainBiClust_14148_0_ClustSize_172_seq0_10__1	ACACACAGGAACTCGTCTGAGCGCGCCATGACTGAAGTAGGAATGAGCAGATATCGGGGAGTGACTCCCA	0	0	0	0	0	0	0	0	0	0	0	0	2.81224	2.08677	2.79441	1.35644	0.855666	1.22378	0	0	0	2.28478	2.41381	2.28478	0	0	0	6.76307	6.81577	6.74281
KchainBiClust_31557_0_ClustSize_1419_seq0_01__1	CACCAGAGAAGCTGAAGAGTCACGATGATGATCAGACAGAGCACTCGAGAGGTGGAGGATAACGGCGTGGAGTCAGCATGCAGAGCATTG	0	0	0	0	0	0	0	0	0	0	0	0	4.59724	4.56215	4.6229	0	0	0	0	0	0	0	0	0	0	0	0	8.98718	9.00407	9.0061
KchainBiClust_4584_2_ClustSize_3_seq0_02__2	AGTAATGCCCGTAAACACCGCATATGGCACAGGGGTGGTTGGTACGCAGGGATTGTCTT	0	0	0	6.90331	6.97631	6.84869	2.7586	2.45674	2.6548	2.59683	2.74084	2.67798	0	0	0	0	0	0	1.72722	2.25479	1.47908	0	0	0	0	0	0	0	0	0
KchainBiClust_11583_0_ClustSize_56_seq0_10__1	GTCCTGGTCACCCTTCTTAGGTTTCTTTTGCGCCTTTACATTGGTGAAACATTTGCGTCGTTCTCATGGTTACGCGCGCCCTCCTTAGGGTCCCCTTTGGAAGCTCACACCTCTTCTTTCAAGAGCATATGCTCCCATC	4.07754	4.31915	4.43305	2.50553	2.77259	2.59339	4.10574	4.10058	3.94642	3.63099	4.14907	4.28186	7.87074	7.86175	7.91121	3.12731	3.68261	3.24843	2.87286	2.79576	2.3979	5.68017	5.69856	5.66621	0	0	0	6.97915	6.9964	6.94943
KchainBiClust_20017_2_ClustSize_100_seq0_06__1	TTCTTCAACATCTTTTTAATACTTACTCAAGGAGGTCCAAGTCTTGCTCAAATGTAGCACCATAAGTGAAAAATTCATCCATGAACACTTCCATCCCGCTACCAATTTGCTCCTAAA	5.71538	5.65572	5.66456	4.22537	3.43399	3.98102	4.49536	4.30925	4.32005	6.37502	6.59522	6.58989	4.91998	4.91689	4.98415	7.29622	7.21844	7.22322	4.27444	4.3683	4.44877	8.52916	8.49426	8.53338	0	0	0	5.83366	5.79508	5.773
KchainBiClust_25098_0_ClustSize_5_seq0_06__1	GCATCCATCTCATAAATCAGTTTGCCCCAACAGAAGGTTGTAGTCCAAGCTTGCATCAACTATCTCAACCT	5.04864	5.05102	5.11718	2.987	3.06593	3.04452	4.94629	4.87241	4.97733	5.79698	6.45198	6.40084	4.21052	4.5326	4.54745	6.66441	6.64158	6.62798	4.71728	4.78521	4.63781	8.0015	8.05108	7.98432	0	0.693147	0	6.47006	6.45759	6.46276
KchainBiClust_1902_2_ClustSize_605_seq0_01__1	AGCTAAGCATTATATAAGATATCGAACTAAGAATATATAATACTTATTTCAAAGATGAATCAGTAACAACACAGGCTCAACTTTTACTTTCTCTATTGAAGTCAAGAAAGTTAAAAAAGCTAA	6.50761	6.53031	6.61435	0	0	0	3.57888	3.78039	3.8654	5.30827	4.64278	4.84943	6.77619	6.82913	6.80474	6.0733	6.08804	6.07253	3.32623	3.16875	3.47093	7.00231	6.97349	7.03532	0	0	0	6.97	7.017	7.02973
KchainBiClust_2264_3_ClustSize_7348_seq0_01__1	TTGCAGTCTGTCCGCCGCCAATCATTATGGAAAGTAATGACCTTGGGAATAAGGC	1.8718	1.48539	1.65823	0	0	0	0	0	0	0	0	0	0	0	0	0	0	0	0	0	0	0	0	0	8.816	8.82212	8.80796	0	0	0
KchainBiClust_28660_1_ClustSize_1054_seq0_01__1	CATGAATCGTGTATCCTACAGTCTCTTTGACCCATATTAAGGTTTCAAATAA	1.34807	1.42311	2.26292	0.485508	0	0	0	0	0	0	0	0	0	0	0	0	0	0	0	0	0	0	0	0	8.9826	8.95644	8.93665	0	0	0
KchainBiClust_9477_0_ClustSize_2805_seq0_01__1	AGATTATCTTGCATGCATTACCCCATAGATGTGTTGCTAACGACACTTCCTGGGCGTATGCATTTTGTTCATACCTTGTACGCACAGTGT	2.09849	1.72988	1.84372	0	0.648694	0	0	0	0	0	0	0	0	0	0	0	0	0	0	0	0	0	0	0	9.19195	9.15968	9.15319	0	0	0
KchainBiClust_4232_0_ClustSize_3009_seq0_01__2	ATCACTGTTGGACCATTCTGCAAATGGCCATAGCTTCCTCGACTGCAACCCCCCGTCAGCCGGCGGTCACAAACACATCATTGTGGCCG	2.27213	1.45001	2.69463	0	0	0	0	0	0	0	0	0	0	0	0	0	0	0	0	0	0	0	0	0	9.51562	9.47843	9.4772	0	0	0
KchainBiClust_1800_1_ClustSize_4286_seq0_01__2	AGGTCGTGCTCCTATTCCTCCGGTCTATCCCCACGTTCCAGGTCGTATGGAGCCATAGTCTAGCCTAAGCTTCCCCGCGCCGTAAA	2.40742	2.71469	2.2192	0	0	0	0	0	0	0	0	0	0	0	0	0	0	0	0	0	0	0	0	0	9.63569	9.59465	9.58533	0	0	0
KchainBiClust_19797_0_ClustSize_3_seq0_01__2	CACGTTATGATGGATTGTGTTTATGTGTCACGACGTACAGATGATATCCC	7.97708	7.95303	7.96119	0	0	0	4.75684	4.83328	4.73643	2.46385	3.00027	3.04884	1.09861	0	1.09861	0	0	0	5.16972	5.16495	5.26476	0	0	0	0	0	0	0	0	0
KchainBiClust_5832_1_ClustSize_420_seq0_01__2	CACGAGAGGTCCAATATGGGAAGGAGGGGCGCGTTCAACTGTAGGTGCGACGGGATGGGGTTTCGGTGTCGGATACATTCCATCGGATTTCGTTATGTAGAATGG	0	0	0	0	0	0	0	0	0	0	0	0	2.0149	2.54553	2.51904	5.72522	5.69905	5.79327	0	0	0	6.98441	7.02872	6.9937	0	0	0	0	0	0
KchainBiClust_9979_3_ClustSize_3_seq0_06__1	CCTCGGCTCGTTAGAGGGGCATGCACTGGGTAACATACGGCTCTAATGTTGTTGATCTAGATCAACTAGGTGAGAACATGGTTGACATGCAC	0	0	0	0	0	0	0	0	0	0	0	0	2.71469	2.85071	3.3673	7.26783	7.18418	7.23586	0	0	0	7.7541	7.75431	7.7392	0	0	0	0	0	0
KchainBiClust_2391_0_ClustSize_64_seq0_06__1	AAAGCACCCAGCGATTAGCAAGCTAGGCATTATCAGGGGCCTGGGCACCTACCGATAACCAGCCGAACCGGGAATTCCAAGGGACCACCACTTGCATGATACAGCGCACT	0	0	0	0	0	0	0	0	0	0	0	0	2.83321	3.09801	3.39642	6.76258	6.77719	6.84758	0	0	0	7.96954	7.99096	7.97639	0	0	0	0	0	0
KchainBiClust_4390_0_ClustSize_14_seq0_06__1	GAAAACTGATGAACTGAGAGGCCACCAGCTTGAAAACGAGCTCATTAGCTTGAGCCCAGCGCATTTTGAAACCATCCAGGAGTTCTTCACGAAATTCAAGTCACTGGTGCTTCAACTGCACAATGG	0	0	0	0	0	0	0.641854	0.693147	0	0	0	0	0	0	0	6.91165	6.8977	6.84645	0	0	0.597836	7.93133	7.94036	7.92956	0	0	0	4.40672	4.28496	4.26127
KchainBiClust_13575_3_ClustSize_3_seq0_06__1	GTACTTTAGTTTGCAAGCTGTTCGATACAAGTTGGGAAGATTTTGAGAAATGTTTTCTTAAAAAGTATGGCAATCAGAAAACTGT	0	0	0	0	0	0.663296	0	0	0	0	0	0.510828	0.716678	0.906721	0.693147	6.61139	6.62223	6.60069	0	0	0	7.64995	7.64409	7.63613	0	0	0	4.05206	4.13749	4.21428
KchainBiClust_3631_3_ClustSize_5542_seq0_01__1	GTTACCGCCCCATGGCATGTATGGGTTGGGTCCCCACGGACCATAACTGCCCCCGGCCATTTGATTATTCCAAGTAGCATTGCTACTGCTTGAATGTTTGATAAG	0	0	0	0	0	0	1.0116	0	0.597836	3.41499	4.79785	4.70577	0	0	0	8.01097	7.98079	7.94177	0.650589	1.52243	1.32176	7.1886	7.1821	7.1446	0	0	0	0	0	0
KchainBiClust_17777_2_ClustSize_1679_seq0_01__1	CCATCCATATTCAAACTCTAACTACCGCAGGTCGAACCAATAGAACCATAATATGTAGTTAAGATTAAGGTATTTTTAGTT	0	0	0.619038	0	0	0	0.653928	1.27297	0	3.29053	4.8882	4.73306	0	0	0	8.00377	7.99191	7.97096	1.26369	1.31219	0.613102	7.0862	7.11338	7.07448	0	0	0	0	0	0
KchainBiClust_14414_0_ClustSize_1772_seq0_01__1	GGGATGTTTTTGACTACACATTCGAACAACTTCAAATTATTCAAAGTTAACACATGATGGATCCCAAGTTGTGCTGGAAAATCTAGCCGATAATCATTCTCGCCAATGCGTTCTAATACGTATAT	0	0	0	0	0	0	1.38629	0.693147	1.7346	0.635989	2.06546	2.29141	8.02668	8.03146	8.02282	1.32914	0.693147	1.7346	1.89712	1.06087	0	2.53898	2.25712	2.7586	0	0	0	0	0	0
KchainBiClust_25706_0_ClustSize_138_seq0_06__1	TTATGGTGGCAAGTTGTTCTTGCCTTAATCTCACATTTCCTTTCAAGTACATATGTGGAATGGTT	0	0	0	0	0	0	1.5976	1.83258	1.27766	2.29075	2.84354	2.88382	6.09011	6.05278	6.04011	2.75029	2.85037	2.54668	1.50408	1.75402	2.12026	3.61251	3.35299	3.51942	0	0	0	7.44297	7.41822	7.43835
KchainBiClust_26792_10_ClustSize_3_seq0_06__1	ACTACAAAATCATCTTTTCACCCTCTGTTTAAAAGTTGAATAGAAGAACACCGCAACCACTTAAGCTTGAGTCCAATCACATTCTATCCTATAAAAGA	0	0	0	0	0	0	0	0	0	0	0	0	0	0	0	7.15322	7.06684	7.11097	0	0	0	7.92784	7.93837	7.9332	0	0	0	0.693147	0	0
KchainBiClust_11105_2_ClustSize_69_seq0_06__1	TTATTTGTCTCACGTATCGATCATACACATCTCTTGTCCCGATCAACTCCCAATCTAATGGCC	0	0.693147	0	0.693147	0	0	0	0	0	0	0	0	0	0	0	9.72086	9.69558	9.70486	0	0	0	9.74133	9.74869	9.73067	0	0	0	0	0	0
KchainBiClust_2558_2_ClustSize_3_seq0_06__2	GGTCAAAGATGAAATGCGACCGTGCGTTTTCTCTAGAGTTGGGCTTAAAAGGGTAGAAAGTAGCTAGGAACGTCACGAAAGTTGGCAAATT	0	0	0	0	0	0.641854	0	0	0	0	0	0	0	0	0	7.24962	7.20947	7.2181	0	0	0	8.01609	8.02338	8.02404	0	0	0	0	0	0
KchainBiClust_12031_0_ClustSize_1449_seq0_01__1	GGCGTCCCCTCCGATGGTGTTCCCATTGAGGAAAAGTCGAGGAGAGCCAGAGTGCCAG	4.89597	4.85063	4.95834	5.54908	5.64368	5.67944	5.84344	5.75766	5.84313	6.58425	7.13346	7.1325	6.98848	6.9336	6.93565	6.06511	6.00327	6.05737	6.04297	6.13084	6.06437	6.98851	6.93158	6.92345	6.64792	6.65401	6.67879	6.04805	5.96661	6.0774
KchainBiClust_8417_0_ClustSize_2476_seq0_01__1	AAAATGGATTCAGTTCATGGAATGAAGGAACATAAGGGCTGTACTGCAATTCATGACTATTTT	3.94671	4.00412	4.00733	5.0678	5.12116	5.08433	5.24082	5.19328	5.1351	6.09569	6.69827	6.70391	6.43275	6.46989	6.44123	5.51272	5.52216	5.34935	5.63353	5.5101	5.64545	6.47425	6.54872	6.48419	5.97456	6.02245	5.94342	5.46955	5.46905	5.37255
KchainBiClust_11151_0_ClustSize_2066_seq0_01__1	GAACAATTTTGGAGGCAATGGTAACATATTGCAAAAGTCATGATAAGATTCTTACAATATCCAATATTCTGAGCATATGGAATTACTGATATCATATTTGCCAACT	3.69777	3.83329	3.67991	4.82143	4.81102	4.68675	5.10421	5.05397	5.12651	6.01022	6.57726	6.66423	6.16931	6.22385	6.19032	5.36263	5.13538	5.22766	5.36564	5.13622	5.2192	6.15743	6.14511	6.17601	5.91812	5.86586	5.91697	5.26306	5.19296	5.256
KchainBiClust_27854_1_ClustSize_14_seq0_10__1	AGTTTTGGTTATGTAGTTGAACTTGGTACTATATGTTAATTTGTTAAAGGAATCGTCTTTCGGTTCACTATTTTGCATA	0	0	0	0	0	0	2.22708	1.3633	1.84845	1.88569	2.72904	2.26554	5.18992	5.18967	5.24559	0	0	0.641854	1.48367	1.5506	0.897943	0	0	0.965081	0	0	0	7.30244	7.33563	7.33332
KchainBiClust_1015_1_ClustSize_3_seq0_06__2	TTAGACCTATCACTGTCCGTGACACGTGTTGTTGTCGTTATCATGTGGAGTTTGAGTTGTTTAATAAATTCAAAGAAGTTAAAATTTCTATCAATACATTTGTGCAACAAAAACCATGGTTTGTTAGCCCATCCT	0	0	0	0.498992	0	0	1.4604	1.56688	1.5089	0	0.773191	0	3.73825	3.41167	3.52421	6.87197	6.82752	6.84447	1.90954	1.64998	2.22708	7.15962	7.15954	7.15436	0	0	0	2.71196	3.02126	2.63375
KchainBiClust_1058_7_ClustSize_3_seq0_06__1	CCTCCTACCCGGTGGCCCATGTGTCACCTTGCAGGTCCATCTTGGAAACTAGGGTTTTGCTCAGTGTGGGAGTGTGCAATTTTTGCACACGGGGTCACTTTG	0	0	0	0	0	0	1.40399	1.45343	1.44036	1.15268	1.73039	1.67765	3.88271	3.55694	3.57422	6.59175	6.56497	6.52703	0.597836	0	0.719122	7.874	7.86672	7.86654	0	0	0	3.42679	3.26449	3.05843
KchainBiClust_24911_9_ClustSize_18_seq0_06__1	TAAAGAAACGAATGTATAGGGCTTTAAATGCGATGGCTTGACCTTGATTTATAGTGATGACAACCCAACGGATAGAACCACCACGGTCGATTCTATCAGCACCCGACGCTTAGAAAACGTTGAACTACGCGATGCA	0	0	0	0	0	0	0	0	0	0	0	0	3.77506	3.72006	3.61989	5.74343	5.66134	5.71329	0	0	0	6.82111	6.84503	6.87812	0	0	0	0	0.579816	0
KchainBiClust_2754_0_ClustSize_372_seq0_05__1	CTTACCGCACTGCTATGCGCCATTGCCCTTGCTACGGGGGATCTGCTACAGCTATAGATGCTTACCGTACTGCTACTTCACTACTTCTCTGCTTTATTTCAA	0	0	0	0	0	0	0	0	0	0	0	0	9.27927	9.26954	9.28044	0	0	0	0	0	0	0	0	0	0	0	0	3.69027	3.96609	3.6847
KchainBiClust_6424_0_ClustSize_2128_seq0_01__1	TGGACTTCCACCATCAACTACAGGAAGAGAATGAAGGACACCAAGCTACTACTGAAACGCCAGAGCGTCTTGGTGATGCGCTACATGGTACAATTCCAACCCCCTTACCTCCATTAGCAAGCA	6.26369	6.26237	6.20967	2.58834	2.37669	2.31025	3.94083	3.98613	3.99608	6.11674	6.83667	6.75863	5.48639	5.53278	5.48512	4.0969	4.02946	4.42346	5.23193	5.04591	5.22657	5.66109	5.63149	5.59156	7.54478	7.50384	7.44028	4.62799	4.11841	4.32464
KchainBiClust_5312_2_ClustSize_36_seq0_01__1	ATGCCAATTGGCAAAGTTTAGTGAGTGCTCCTGTGAAGTCATCAAAAGCACTAGGACCAAATC	5.09375	5.08451	5.03695	4.99506	4.74848	4.80662	4.2754	4.39051	4.29852	6.09347	6.68182	6.64385	5.51782	5.55349	5.55577	3.42663	3.69793	3.46574	4.30529	4.12273	4.35262	5.28528	5.37043	5.29718	5.13419	5.05798	5.10153	4.28484	4.2569	4.33253
KchainBiClust_4018_2_ClustSize_934_seq0_01__1	TGCTTTTCTTATTACTTGATTCTGCTTTATTGATTGACCCAACGTTTGCTTGCTGTTCTGAAACTTAATCACATTTGATGATTCT	0	0	0	0	0	0	0	0	0	0	0	0	7.1236	7.07454	7.14684	0	0.566393	0	0	0	0	0.530628	0.543614	1.08335	0	0	0	8.03897	8.05602	7.99248
KchainBiClust_31528_1_ClustSize_46_seq0_07__1	AAATATGGATTTGTACCTGGAAATGGGACTGGAATGGCTTATGGCTCCCGAACTACTGGCTTTCGAACTGCAATGGGCTCTGCCTCTCCTGTCTCTATGCCCACCTTGACCTCGTTGCC	5.4041	5.3213	4.95553	5.11525	5.24565	5.23459	4.78395	4.55164	4.65943	6.34679	6.61658	6.59433	5.81661	5.71456	5.66372	3.83241	3.78662	3.54367	5.171	5.04244	4.94316	5.16911	5.2212	5.18008	0	0	0	4.28547	4.42757	4.30897
KchainBiClust_9755_1_ClustSize_59_seq0_01__1	CTGCTAATGTCTTCCATGCATAGATCTGGTTTTTGCAGCTCTTTTATGTTCAACTAACCGCAGATCTG	5.20774	5.18425	5.25604	5.02782	5.13815	5.06815	4.23471	4.22562	4.16013	6.03008	6.64301	6.64836	5.50793	5.43057	5.4618	3.48062	3.17972	3.68085	4.53081	4.24276	4.38002	5.66844	5.47847	5.56712	0	0	0	4.12444	4.33675	4.2562
KchainBiClust_11099_1_ClustSize_3_seq0_06__1	AGCAACCCCTTTTGGATATCTTCGTCACAAGTTGGGGGTTATAATTTCTTGTGTCTAATCTATTCACCTGGTTAGGGGGAGTACTTATTGAATATCTGGTGTATTTCAAGATCT	5.77596	5.86185	5.74523	5.8321	5.72613	5.71546	5.21751	5.06602	5.06156	6.63291	6.33183	6.34405	5.9685	5.96134	5.93077	5.09194	5.09887	5.23809	5.59707	5.30218	5.52645	6.05555	6.03069	6.05502	0	0	0	5.07148	5.133	5.11848
KchainBiClust_1253_0_ClustSize_1522_seq0_01__1	CCTGGAAAATGTTCACTTGCTGCCTTGAGTCCGTTGAGTTATGGATTCACTT	0	0	0	0	0	0	0	0	0	0	0	0	0.693147	0.693147	0	0	0	0	0	0	0	0	0	0	0	0	0	7.02367	7.01912	7.03165
KchainBiClust_10841_0_ClustSize_3476_seq0_01__1	CATACCGGATGCTAAACCTGTTCGTCAACGATTACGTCAAATACATCCTAGAAAAGCTGCTGCTATAAAAACTGAAGTTGAAAAATTACTTCG	9.64834	9.59671	9.57779	7.58805	7.66588	7.643	8.40292	8.41474	8.44294	4.98795	6.51579	7.20759	6.54156	6.5233	6.50006	0	0	0	1.98413	2.19722	2.43042	4.2917	4.48352	3.29246	4.81955	4.72819	4.90864	8.48527	8.42597	8.44263
KchainBiClust_7805_1_ClustSize_9_seq0_05__1	GAGGTAACTTCTTAATACGGCGTCACCAAGGTTGTGCGCCCCAATGCACGTCCGCAACGCAAACGCAAGGCATGTCTGAAAGTTGGGCGCCCC	2.81091	2.94444	3.07269	1.75254	2.35138	2.03377	0.624156	0	0.931558	1.37055	2.56013	2.11021	6.5796	6.55642	6.53841	4.49424	4.36071	4.39599	1.60944	0	0.81093	5.7456	5.78498	5.76519	1.09861	1.09861	1.19625	4.88138	4.75521	4.88423
KchainBiClust_954_0_ClustSize_1194_seq0_01__1	GTGAAAGTCGCATCACGATCCGAGACAATGGAAGAAGGGATGCCATGAAGACGAAAGATCTGGTCCGGAAAA	0	0	0	0	0	0	2.33214	1.09861	1.70475	0	0.693147	0.693147	3.3419	3.25459	3.41922	0	0	0	0	0	0	0	0	0	0	0	0	6.99268	6.90128	6.89789
KchainBiClust_31045_1_ClustSize_3_seq0_01__3	ATATATGTACATGGCTCAAATATCCAAAAAGTGTACAAGGTCTCTATTTTACAAAAATACAAAATATACAGAAATTATTTTTCAGGTGAGGAGGTCCATCT	5.25189	5.11696	5.05823	0	0	0	0	0	0	0	0	0	4.38381	4.06582	4.37665	0	0	0	0	0	0	0	0	0	0	0	0	8.65672	8.65476	8.65783
KchainBiClust_6433_0_ClustSize_536_seq0_01__1	GTATGGTGGAATAGACAAGCCTATATCCGTCCGGTCGAGAGAATATAGGCCCTGCTCTCCCTATCTCCGGCAGGTCTATCATATACGGAAGGAATGAATTTGACAAGC	0	0	0	0	0	0	0	0	0	0	0	0	0	0	0	0	0	0	0	0	0	8.73471	8.67051	8.44114	0	0	0	0	0	0
KchainBiClust_297_0_ClustSize_3_seq0_06__1	TTTGAAAACTGCAAAGTTTCACTCCTCAATTTTGCCTTTGAAACTTTCGGATTCACTGGACGTGACCCTGAACTGGGGTTTGATGAAGCCACTCT	0	0	0	0	0	0.392042	6.8506	6.88341	6.84459	5.98741	6.20423	6.17471	7.78471	7.78327	7.80178	7.42982	7.38437	7.41307	6.8684	6.83128	6.83984	8.11644	8.11415	8.11305	0	0	0	5.32557	5.32117	5.34512
KchainBiClust_15542_1_ClustSize_5_seq0_01__1	AAATTATAAAGATTTATCCATAACCCATGAGGATGTGTGTATGAAACTATTGGCTTCGTCCTTCAAAGAAAGAGCTGAGATCTGGTTCTTA	0	0	0	0	0	0	2.49527	2.65159	2.53072	1.51146	0.782759	1.52606	0	0	0	5.90597	5.89272	5.84628	2.27727	1.84253	2.41906	6.59548	6.52511	6.52918	0	0	0	1.70475	1.40009	2.05839
KchainBiClust_14979_5_ClustSize_186_seq0_01__2	TCTGTATAAATAGAGTCATAATTGAAAGATAAGTTTGACATCGGAGACAAAACCCAAATTCTTTTGAACGTCGTATAGCTATCAATAACACTCGTTTGTATACTACTCTAATTACCCGGTTACGCACAGTGAGAAGCCA	0	0	0	0	0	0	0	0.693147	0	2.11296	2.54375	1.17272	0	0	0	6.20782	6.28514	6.23667	0	0	0	6.60644	6.51688	6.60665	0	0	0	2.57085	2.15355	2.72458
KchainBiClust_687_10_ClustSize_8_seq0_06__2	AAATAACATCCTTAGAACACATCACCAAAAGACTTCATCCTCCCTTGAAATCCGGCCTTCTTTACTTCTTATTTCCTCTAAAATTCGACT	0	0	0	0	0	0	0	0	0	0	1.71008	1.83023	0	1.65542	1.03407	5.96403	5.89829	5.93427	0	0	0	6.63841	6.60744	6.7178	0	0	0	0.693147	1.0116	0
KchainBiClust_7402_2_ClustSize_12_seq0_09__1	GAACCATGTCCCGAGCTAAAGAAAAGGAACCTACAAAGAAGACTAAGCAGGATGGAAGAGACTTCTTCTACT	0	0	0	0	0	0	0	0	0	0	0	0	0	0	0	0	0	0	0	0	0	0	0	0	7.19962	7.18311	7.19318	0	0	0
KchainBiClust_18614_2_ClustSize_6_seq0_09__2	CATAACAATGAACAAGTAGATGATGACCAAGATGACTTTGCCGCATTCTCTAAACATGGGGACTCAACCACA	0	0	0	0	0	0	0	0	0	0	0	0	0	0	0	0	0	0	0	0	0	0	0	0	7.3265	7.31277	7.31515	0	0	0
KchainBiClust_11131_1_ClustSize_25_seq0_01__1	TCGATCATGTTTCCTTGGAACGAACGCCCTCGTACAATTACACATCGATTATATATAAACCA	6.84496	6.85906	6.79668	0	0	0	0	0	0	0	0	0	0	0	0	0	0	0	0	0	0	1.09861	0	0	0	0	0	0	0	0
KchainBiClust_11131_3_ClustSize_25_seq0_01__1	TCTCATCTTAGCCCTATTGGCCTTGTTGGATCCAAGCATCATTCCAACAT	8.31699	8.32269	8.33235	0	0	0	0	0	0	0	0	0	0.693147	0.693147	0	0	0	0	0	0	0	0	0	0	0	0	0	0	0.693147	0
KchainBiClust_11527_2_ClustSize_21_seq0_06__1	AAGTTCCGACTCGGAGTGAGAGAACCCAAGCAGCTGAAGCAATGTGTCTAGTGTGACGACTAGCAC	0	0	0	0	0	0	0	0	0	0	0	0	0	0	0	6.56934	6.47157	6.55137	0	0	0	6.30719	6.27344	6.26416	0	0	0	0	0	0
KchainBiClust_11594_1_ClustSize_43_seq0_01__1	GGATTTTCCTTCGCGTGTAAGGAGGATTATTTTCTTCTTTGTATATATCCATCTTTAGAAGAGGAAACCCAGCAGCCCTGCATTGTAGATTCTATTTCTTTACCTCAGCTTATTCCT	6.82043	6.89461	6.81892	0.81093	0.971862	1.13943	0.656779	0	0	0	0	0	0	0	0	0	0	1.38629	0	0	0.579816	1.6247	1.8894	1.9994	0	0	0	0	0	0
KchainBiClust_1203_3_ClustSize_3_seq0_01__3	CAAAGCTAACTCGGGGGGGTCAATCAATGCCAGCCTCTCCCTACTTAGCAACTTGATTAACTTTTGGAAACGTTCTGGACCAGTGTCGAGCTGTCTTTAGCATGATAGGTA	7.83969	7.88311	7.80378	0	0	0.995427	0	0	0	0	0	0	0	0	0	0	0	0	0	0	0	0	0	0	0	0	0	0	0	0
KchainBiClust_26711_0_ClustSize_1093_seq0_01__1	GAAAGCAACAATAGCCATAAAAGCAGATGCTAACTTAGCAGAAAAGAGGGCTAGGACTAGATCAGAAAG	1.07264	0	0	0	0	0	0	0	0	0	0	0	0	0	0	0	0	0	0	0	0	0	0	0	7.44161	7.41891	7.47205	0	0	0
KchainBiClust_21107_1_ClustSize_661_seq0_01__1	CCTATGATTTAGGTTTGATGCAGAGGTTATGGATGGATTCTACGAGTGTGTCGAGAGGATGGTGCCAAGTGAAGCTGACC	0	0	0	0	0	0	6.60858	6.52062	6.48747	0	0	0	0	0	0	0	0	0	0	0	0	0	0	0	0	0	0	0	0	0
KchainBiClust_9371_3_ClustSize_449_seq0_06__1	ATCAAAGTACAATTTAGCTCATTTTAGTCAAGGTTAGTTAGAAGAATTAGCTATTGGTTTCTGCCTTCAATTTCCTTGAAAAGAATGTGTACGTGCTTTTG	0	0	0	0	0	0	0.641854	0.570544	1.94591	0	0	0	0	0	0	6.54137	6.52131	6.50534	0	0	0	7.85308	7.85925	7.847	0	0	0	2.89363	2.84054	2.31501
KchainBiClust_15619_0_ClustSize_149_seq0_03__1	ACTTAGTCTCCTAGACAATCTTTAAACAACTCCTAACCACTTAGTTAGGGGGAGGGCAAATAAAATTATCTAA	0	1.04145	0	0	0	0	0	0	0	0	0	0	0	0	0.988611	8.34916	8.37075	8.32403	0	0	0	9.1683	9.15363	9.18733	0	0	0	4.25719	4.13071	3.94589
KchainBiClust_16115_1_ClustSize_1868_seq0_01__1	ATTGCATGATGAAACAGGGCTATGTGCAGGCAGTTAGACCTCACCACAAGACCGAGTTAAGACAGCTCGTTATATACAATGCACCTGTTCAGGTTCAGACACCAGTCATAGACAATAGACA	0	0	0	0	0	0	1.48427	0	1.27766	0.836247	0	1.0116	0	1.21109	0	6.57624	6.57088	6.61711	1.03799	0.470004	0.550044	7.71683	7.73541	7.7536	0	0	0	3.11104	3.08598	2.96183
KchainBiClust_2968_0_ClustSize_1216_seq0_01__1	GCGTCAGTGGGCCGGAATGCAACCCGAGGATGCTACAGGGGAACCACTCTTCAGA	0.693147	0	1.03609	0	0	0	0	0.646627	1.04145	0	0	0	3.4313	3.08754	3.43667	6.95243	6.90167	6.91572	0.693147	0.641854	0	7.87659	7.8726	7.8695	0	1.42712	0	3.07017	2.89037	3.08725
KchainBiClust_32117_0_ClustSize_6_seq0_06__1	ATAAACCTCGCTGCGAAACTGCGCAAAGTACCAATGACATGCTTTAACTAACAATGATGGAGGGTGTCTAATGA	0	0	0	0	0	0	0	0	0	0	0	0	0	0	0	8.3115	8.34487	8.33445	0	0	0	8.17567	8.15265	8.15563	0	0	0	0	0	0
KchainBiClust_12605_5_ClustSize_7_seq0_06__1	GATTAAATTTACTCTAGATTCTAAGTTTAGTAGATCCTTGCACAGATCATTCCCTGTGACTCCAATAGATAGAAGAACTTATAGGATCGTATCATTTT	0.656779	0	0	0	0	0	0	0	0	0	0	0	0	0	0	6.08306	6.12152	6.09966	0	0	0	6.59091	6.60188	6.61139	0	0	0	0	0	0
KchainBiClust_8389_1_ClustSize_1746_seq0_01__1	TTGCCAAAGTAAGCCAATTTGAAATTTGCAATATGAAGCAACCATTGAGAAACATTACAACTGACATAACCCCTAAGTAATGCCACA	0	0	0	0	0	0	0	0	0	0	0	0	9.25965	9.25017	9.25386	0	0	0	0	0	0	0	0	0	0	0	0	0	0	0
KchainBiClust_12821_1_ClustSize_3597_seq0_06__1	CTAGAGTTTGACCTGCCAGATATCCATGAATCCTCTCTTTCGAGACGAACTACCGCCAGGGTTAAGCACCTCTTCCGTCAGATCCAAAACTTCACCATTGCTGCTAGCTCTAGCCATGGCAAATCCATCAAAGGTATGATCCACTAAGTTCCTGTGTA	0	0	0	0	0	0	0	0	0	0	0	0	0	0	0	7.96108	7.92781	7.94084	0	0	0	7.66418	7.62989	7.61315	0	0	0	0	0	0
KchainBiClust_531_1_ClustSize_214_seq0_10__1	TGCTGAACCCCCAGCTCAGTTCATTGAGTACTATTTAAAAGATTGCCTAGGTCTTAGTTGGGTTAACTGTCATTAATGAGCCACCTGCTAGATTC	0	0	0	0	0	0	0	0	0	0	0	0	0	0	0	0	0	0	0	0	0	0	0	0	0	0	0	7.36862	7.36727	7.40876
KchainBiClust_10949_1_ClustSize_4103_seq0_01__1	ATTTGATCTGACTGAACCTGCTTGCCCCATTTCCACTGGATTTGAAACCTCTTGAGTC	0	0	0	0.587787	0	0	0	0	0	0	0	0	0	0	0	8.78856	8.70006	8.74385	0	0	0	9.40634	9.40137	9.4094	0	0	0	0	0	0
KchainBiClust_21170_2_ClustSize_7_seq0_03__1	AAAATAAAAATTATGTACATTCCATAATGGATTTCAGCTTTTATACTGAATGGTTTTTGTAGGTTGGAGGTTTGTTGAG	0	0	0	0	0	0	6.97757	6.9392	7.02232	0	0	0	0	0	0	0	0	0	5.4255	5.29581	5.34353	0	0	0	0	0	0	0	0	0
KchainBiClust_13192_0_ClustSize_2121_seq0_01__1	GAGGATATGTTCATCATATGGCGACGATAGGGCTCTCTTCATCAAATTGTGACACTTGTATATGTTTGTCAATTTTG	0	0	0	0	0	0	0	0	0	7.95363	0	0	0	0	0	0	0	0	0	0	0	0	0	0	0	0	0	0	0	0
KchainBiClust_13225_1_ClustSize_169_seq0_09__1	GGGTCGATTTTGAGACTTTGTTTCTTAAAAAGTTTGGTGAGGATAAGACTCCTGCTGCCCAGTGAGGATCTGTCTAGGATCAGAGCTGAAAACAATGAGCC	0	0.653928	0.926764	0	0	0	0	0	0	0	0	0	0	0	0	0	0	0	0	0	0	0	0	0	8.43976	8.40657	8.42551	0	0	0
KchainBiClust_26078_1_ClustSize_134_seq0_06__1	GGGATGGTCGGAAGATTTCAAGCTGCCCTAAACAAATCACTTAGTAGCTGTCAAAAGAATTTTC	0	0	0	0	0	0	0	0	0	0	0	0	0	0	0	7.72309	7.64983	7.69538	0	0	0	8.59194	8.5682	8.5727	0	0	0	0	0	0
KchainBiClust_14229_3_ClustSize_3_seq0_06__1	GAGTCCACATCAGGCATCCCGCCGCAGGGAATCTCGCAGCAGAGTGCATGGGAGGAACA	0	0	0	0	0	0	0	0	0	0	0	0	0	0	0	7.0039	6.91679	6.93505	0	0	0	7.77306	7.75965	7.75234	0	0	0	0	0	0
KchainBiClust_13703_0_ClustSize_943_seq0_01__1	TTTTATTTTTCATGTAAATGGACATAAGACTATAAGACCTGGTTAGGCGTGCGTACCTCTGGTAAATTACCAGTAAAGTCTATGTGTAAACCTATGTGGAAAAACAGGGGGG	0	0	0	0	0	0	0	0	0	0	0	0	0	0	0	0	0	0	0	0	0	8.97364	8.92479	8.678	0	0	0	0	0	0
KchainBiClust_25178_0_ClustSize_761_seq0_01__1	AAGGAGTTACTCATACCTATACTGGAGGAGGTAATACGGTTAAAATAGTCATTTAATCATATTACATTTACACTTGTCTACAGGGAGAGGAATGGGAT	0	0	0	0	0	0	0	0	0	0	0	0	0	0	0	0	0	0	0	0	0	8.8986	8.83855	8.61743	0	0	0	0	0	0
KchainBiClust_12846_0_ClustSize_313_seq0_08_Spruce_1	CGGGTACGCTGGGTATCTTAGGTCAGCGTATCGGGTCATAGCGTAACAACAGT	0	0	0	0	0	0	0	0	0	0	0	0	0	0	0	0	0	0	0	0	0	8.75314	8.71011	8.44332	0	0	0	0	0	0
KchainBiClust_13800_1_ClustSize_256_seq0_01__1	TCGTGCGGGTGAGGGCGTCCCTTCGGGTCGGGTGGGCGCGTCGTGTCGTGT	0	0	0	0	0	0	0	0	0	0	0	0	7.56183	7.50589	7.5275	0	0	0	0	0	0	0	0	0	0	0	0	0	0.641854	1.06784
KchainBiClust_14135_0_ClustSize_3132_seq0_01__1	ATTAATTCAGACTCATAGCCCAATGGATGTGTAAGCTGTCTCAACCATTTATAAACCCTTTTT	0	0	0	0	0	0	0	0	0	0	0	0	0	0	0	6.22158	6.14397	6.16752	0	0	0	7.70679	7.72347	7.70043	0	0	0	0	0	0
KchainBiClust_26393_3_ClustSize_72_seq0_01__1	CCTATAAATACCGTTGTATTCTGTCTCGCGGGCATTACCAACACTAGAATTT	0	0	0	0	0	0	0	0	0	0	0	0	0	0	0	5.44889	5.32718	5.38121	0	0	0	6.73841	6.73654	6.74759	0	0	0	0	0	0
KchainBiClust_14183_1_ClustSize_7621_seq0_01__1	GCTGGTGTAGGAGAGCCATCCCAGCAACATTAGCAGATGGCATAATGCGCCTACTGCTACACTACAACTGCAACGGATGAAGAT	0	0	0	0	0	0	0	0	0	11.4899	0	0	0	0	0	0	0	0	0	0	0	0	0	0	0	0	0	0	0	0
KchainBiClust_14229_4_ClustSize_3_seq0_06__1	GCAGCAGGAAGCGTGAGTCCACATCAGGCATCCCGCACGCAGGTGAATCTCGCAGCAGAGTGCATGGGAGGAACAGTTTTCAACTGGGTGATG	0	0.405465	0	0	0	0	0	0	0	0	0	0	0	0	0	5.78758	5.75937	5.76484	0	0	0	7.14174	7.12668	7.17755	0	0	0	0	0	0
KchainBiClust_13575_8_ClustSize_3_seq0_06__1	TTTAGTTTGCAATCTGGTTCGATAACAAGTTGGGAATATTTTGAGAAATGTTTTCTTAAAAAATATGGCAATCAGAAAACTGTAGCTACTTCATGAA	0	0	0	0	0	0	0	0	0	0	0	0	0	0	0	5.68647	5.6981	5.65003	0	0	0	7.2418	7.24147	7.25753	0	0	0	0	0	0
KchainBiClust_15609_6_ClustSize_44_seq0_06__1	CGTCAAGGGCACGTGCGCGTCCAGATGTGGTGCGTGGTTATGCTGCGTGCACGCAGTCATAACAATAAGTTTTAT	0	0	0	0	0	0	0	0	0	0	0	0	0	0	0	5.35894	5.33232	5.23334	0	0	0	6.79459	6.82292	6.78323	0	0	0	0	0	0
KchainBiClust_30196_6_ClustSize_3_seq0_06__1	GCTGTAGTGGGGAAACATCTTTGTAGAGTAGCTACAGATATGGCCGACGAGCCCTCTTAATGAACAAAACTGTATCTGAAGATACCAATG	0	0	0	0	0	0	0	0	0	0	0	0	0	0	0	5.23998	5.14322	5.0962	0	0	0	6.56244	6.63446	6.67093	0	0	0	0	0	0
KchainBiClust_26167_7_ClustSize_3_seq0_06__2	GAAGTAGTATTAACTGTAACTACAGATTATATTCCATGATTGTTTAAAAAACTAATAGACAAGGGTGATTAAAACAAGTGGAGTTAAGAAAAACAA	0	0	0	0	0	0	0	0	0	0	0	0	0	0	0	5.35363	5.19573	5.3224	0	0	0	6.734	6.82215	6.803	0	0	0	0	0	0
KchainBiClust_18907_1_ClustSize_599_seq0_01__1	AAGTGCCTAAAACTTGTCTAAAATTCACCCAACACATCTAAAGACCCACCCGCGGGTCATAACAACACTTAGAAACATTTTTAGGGGCTCATTC	0	0	0	0	0	0	0	0	0	0	0	0	0	0	0	5.41654	5.36831	5.28473	0	0	0	6.92363	6.93527	7.01148	0	0	0	0	0	0
KchainBiClust_25465_1_ClustSize_51_seq0_06__1	GAAAGTCATCGACCTCTTGGCTTACATCCCTCGATGCGGTATCTTCGACGAGGCCGGTACACTTGACACTTCTTCCTCAAACACCTCCT	0	0	0	0	0	0	0	0	0	0	0	0	0	0	0	5.0044	5.12793	5.1303	0	0	0	6.67001	6.63516	6.62972	0	0	0	0	0	0
KchainBiClust_14311_1_ClustSize_2624_seq0_01__1	GGGTTCGGATTGTTGCTTTCCCGTCTCGTATGTCTTTTCCGTGCACCTTGAGCGATCTCGGCAAATCAGAAACAGAA	0	0	0	0	0	0	0	0	0	0	0	0	8.6883	8.69548	8.69005	0	0	0	0	0	0	0	0	0	0	0	0	0	0	0
KchainBiClust_1772_0_ClustSize_882_seq0_05__1	GATATAAATAAGATCTTTACGGAGGAATAAACATCTCCGGAATAATAAAGTACAATTATAATATTCTTTGAAGTTACAATATCTC	0	0	0	0	0	0	0	0	0	0	0	0	10.7605	10.7721	10.7689	0	0	0	0	0	0	0	0	0	0	0	0	0	0	0
KchainBiClust_23438_1_ClustSize_3346_seq0_01__1	TTTACAAGTTATCAAGTGATGATTGAAAACACATTAAAAAAATTGTTGACCTGATCCATATAACAACCCTCGATCAGGCAGGGCA	0	0	0	0	0	0	2.67415	3.26084	2.84158	5.49804	7.07345	7.04963	0	1.21109	0.887303	9.27251	9.22652	9.24828	3.39163	3.34488	3.61477	8.39168	8.39436	8.38263	0	0	0	0	0	0
KchainBiClust_11175_0_ClustSize_3809_seq0_01__1	AATGTTCCTATCTTGCTGCAGCTGTACCAGATCATGAATCCTTCTAGTCAGATCGTTGGGTTCCTCATCCGCCTCCTGTAAGAATTTTGCAACTGGCAATGCAAGCTGGACGGGAAATATGGCCTCAGTACCAT	0	0	0	0	0	0	0	0	0	0	0	0	0	0	0	6.42784	6.44307	6.46264	0	0	0	7.84041	7.81265	7.81494	0	0	0	0	0	0
KchainBiClust_1740_0_ClustSize_5928_seq0_01__1	GTTATGTGCCCTACCTAATGATGAAAACCCAAGGTACAAAGGTTCCTCAGTTGCTTACC	0	0	0	0	0	0	0	0	0	0	0	0	0	0	0	6.69938	6.54521	6.54808	0	0	0	7.96301	7.97855	7.98555	0	0	0	0	0	0
KchainBiClust_1926_4_ClustSize_858_seq0_01__1	ATAGGCCATCAAAGTGGGAAGAGTATCTGCATTTAGCTGAGTTTGCCTATAATAATAGCTACCAATCCTCTATTAAGATGAGCCGTTTAGGCACTCTA	0	0	0	0	0	0	0	0	0	0	0	0	0	0	0	5.63515	5.58425	5.6102	0	0	0	6.78446	6.81124	6.71829	0	0	0	0	0	0
KchainBiClust_31621_1_ClustSize_726_seq0_02__3	GCATAAATCCTTTAGCTTAGGATGGGCTCAGGTAGTTCATCCTATAGCCTTAGG	0	0	0	0	0	0	0	0	0	0	0	0	0	0	0	6.30843	6.24205	6.33892	0	0	0	7.62998	7.59812	7.6332	0	0	0	0	0	0
KchainBiClust_7693_5_ClustSize_1636_seq0_01__2	TATACAAGTGGCGAGAGGAATTGACTTCCATGGAAGGTAAGATGGCTAAACGCACGATCATTCGTCATTGTTCTCAAATAATGAAAGAATATTTTGATCCAAAATCC	0	0	0	0	0	0	0	0	0	0	0	0	0	0	0	5.52899	5.58475	5.54257	0	0	0	6.7338	6.72503	6.6217	0	0	0	0	0	0
KchainBiClust_17837_0_ClustSize_1236_seq0_01__1	AGTGAGTCTGAAACCAAAACATTTCCTGATCACGAACCAGGGTAAAGACAAATAAC	0	0	0	0	0	0	0	0	0	0	0	0	0	0	0	7.09775	7.02108	7.05597	0	0	0	8.62024	8.63349	8.62515	0	0	0	0	0	0
KchainBiClust_14427_1_ClustSize_23305_seq0_01__1	AATATAGATAATCAACCAATACAAGATGTAGTACCCAAACAAGAGCTCCTTCTCCTCCATGCAG	2.3979	2.19722	2.30259	2.17682	2.79998	2.77259	2.0149	2.30259	2.5096	0	5.88963	6.11509	3.62434	3.88542	4.03645	10.7656	11.011	10.7651	2.34607	2.76001	2.76562	1.50408	2.14007	2.08722	2.30259	2.99573	3.26661	2.70136	2.8792	2.58022
KchainBiClust_5812_2_ClustSize_3_seq0_06__2	AAGTGTTAGATTGCAAATCAAGTGGGATCTCACCTACCCATGTGCTAGATCTAACCAAACAAGCC	0	0	0	0	0	0	0	0	0	0	0	0	0	0	0	7.33041	7.33955	7.31163	0	0	0	7.36047	7.39822	7.39584	0	0	0	0	0	0
KchainBiClust_25955_1_ClustSize_23_seq0_06__1	TCTCTAAATTCATTGAAAACCCCACAGTGACGCAAGTGAGATAAAATCTTGGAGCAGATAGAGTTCATGCATGACCGCACTTTAATGTGCAAATTTATTAGTGCTTGGCCACCAAAACCAGATTTGG	0	0	0	0	0	0	0	0	0	0	0	0	2.24374	2.16496	1.79176	4.84306	4.62006	4.86258	0	0	0	6.53015	6.62596	6.57687	0	0	0	0	0	0
KchainBiClust_3641_0_ClustSize_11_seq0_01__3	ATCCGCACATAAAATTAGTCCTGAGGGCCACTCTATCAGACCATTCGCACAGATGATGAAGACCTGCAGG	0	0	0	0	0	0	0	0	0	0	0	0	0	0	0.916291	6.38182	6.38456	6.43748	0	0	0	7.45503	7.49422	7.49348	0	0	0	0	0	0
KchainBiClust_15473_1_ClustSize_595_seq0_06__1	AAAGGCTTTAATGTCCTTGCCTGCTACCAAAGGATTTGAAATTGGCAGTGAGCACAATGATGAGTTTTACATGGATGAGAGTGGAGATATTAGACCAGAC	0	0	0	0	0	0	0	0	0	0	0	0	0.424882	0	1.25276	8.57714	8.57686	8.57394	0	0	0	9.26584	9.26713	9.30423	0	0	0	0	0	0
KchainBiClust_14420_1_ClustSize_1927_seq0_01__1	CCCTGGAACTCGGTGATCTTCCACTGTCCTGTGCCTAGAAGAAGGCCTTTTTTAGACTCTTGGCCGCTT	0	0	0	0	0	0	0	0	0	0	0	0	0	0.430782	0.86904	7.51453	7.46086	7.51698	0	0	0	8.57533	8.60144	8.57008	0	0	0	0	0	0
KchainBiClust_14798_0_ClustSize_1036_seq0_01__1	AAAGGGCGAGCTTTGTGGGTGCACGAATAAAGCTATGCGGTAGGAAGAGAACGTCGTACCTTTGCAGGATGATCATCAAACTACTTCTCTTCT	0	0	0	0	0	0	0	0	0	0	0	0	1.06087	0	0	5.15201	5.00021	5.0032	0	0	0	6.67806	6.74707	6.69649	0	0	0	0	0	0
KchainBiClust_28376_0_ClustSize_3_seq0_03__1	TCACTTAGGAAAGGTATATACAATCGATACTTTGCCTCCGCAAATCCCCGCGCTGCATTCCACAGGAGTAATGGAACATGGGGACTTCTGGTGGATTATTTGTGACACAGTCA	0	0	0	0	0	0	0	0	0	0	0	0	1.13498	0.570544	0.97345	6.01572	6.02982	6.00044	0	0	0	6.79177	6.79827	6.85151	0	0	0	0	0.986496	0
KchainBiClust_12587_4_ClustSize_1877_seq0_02__1	ACCTTCCTGTCCCTTTGAGGCCACTCAACGCCCAAGATCAGTTGTTTTTTGGACCCCTGTGTTTCATTGTACCTCAGTATCACCTTATACATACTG	0	0	0	0	0	0	0	0	0	0	0	0	0	0	0	7.71293	7.62021	7.66536	0	0	0	9.07937	9.05856	9.05972	0	0	0.635989	0	0	0
KchainBiClust_10949_0_ClustSize_4103_seq0_01__1	TGGAGGCTACAACCATGTTGAGTAATTAAATAATCAAAGAACTGACCTGCTTGCCCCTCAGGCATATCATACAGGGCCTGGTATCCATGTGC	0	0	0	0	0	0	0	0	0	0	0	0	0	0	0	5.79682	5.75535	5.7589	0	0	0	6.61288	6.60716	6.68367	0	0	0.693147	0	0	0
KchainBiClust_2558_1_ClustSize_3_seq0_06__2	GCGTTTTCGCTAGACTTGGGCTTAAGGGGGGAAAATAGCTAGGAACGTCACGAAAGTTGG	0	0	0	0.328505	0	0	0.693147	0	0	0	0	0	0	0	0	6.44512	6.3845	6.40371	0	0	0	7.13498	7.11579	7.1345	0	0	0	0	0	0
KchainBiClust_13058_1_ClustSize_223_seq0_01__1	ACCAAACATAAATCACCTCACTTAAGTGGCTGGAGACAAATAATCTCTTTAATAACCTGATTCAGCGAAACCAATCCGCGGCCTTTAGTAGCGGTAAATTAGAC	0	0	0	0	0	0	1.04597	0	0	0	0	0	0	0	0	7.15275	7.15983	7.09545	0	0	0	7.86321	7.88822	7.86395	0	0	0	0	0	0
KchainBiClust_23440_2_ClustSize_22_seq0_04__1	GCCTGGTGGAGATGATGACGTCATTATTGGAAGAGGCCCAAGGAGAGAGGGCACTAGGCTGCGAAAGGACTAGGAGGGTGCTTGAGGAGACCAAGAAACAGGCAGAGCCTCACAACTGAGAG	0	0	0	0	0	0	0	0	0	0	0	0	1.18958	0	0	5.77775	5.68799	5.79596	0	0	0	6.45703	6.49396	6.50743	0	0	0	0	0.693147	1.09861
KchainBiClust_1058_1_ClustSize_3_seq0_06__1	GGGTGCCCCTCCCCTCCTACCCGGTGGCCCATGTGTCACCTTGCAGGTCCTCTTGGAACTAGGGTTTTGCTCAGTGTGGGAGTGTGCAATTTTTGCACACGG	0	0	0	0	0	0	0	0	0	0	0	0	0	0	0.969399	6.82502	6.8188	6.84909	0	0	0	7.81609	7.80146	7.81789	0	0	0	0	1.38629	0.693147
KchainBiClust_21516_0_ClustSize_1733_seq0_01__1	GCACACTTAGTTAACCTCCGGGCAAGTTCAATGTGCGACCACCGTCTGATGGCCCTTCTCCAAATCAACGACTCTTGGCAATTTCGCTC	0	0	0	0	0	0.693147	0	0	0	0	0	0	0	0	0	5.16352	4.89618	4.96517	0	0	0	7.0067	6.98482	6.96014	0	0	0	0	0	0
KchainBiClust_8079_0_ClustSize_3_seq0_06__1	TTGCAAATGATGTGTCTTGTTCAAATCTATTTGAGTTAGGTCACCATTATATGTGTATATTTATCACAAAATTTTTGGGTAAAGTT	0.693147	0.606134	0.693147	0	0	0.693147	0	0	0	0	0	0	0	0	0	6.52334	6.42346	6.51973	0	0	0	7.08208	7.08565	7.05558	0	0	0	0	0.693147	0
KchainBiClust_22770_3_ClustSize_537_seq0_06__1	AAGCTATGAAACTAGTCATGAGATGGGCCAAGTACTGTCATAGTTCAACAATACCTTCCATACATTTCGCACCAAGATGGG	0	0	0	0	0	0	0	0	0.559616	0	0.980831	0	0	0	0	6.08051	6.08772	6.06281	1.29928	0	0	7.3025	7.36718	7.40128	0	0	0	0	0	0
KchainBiClust_10385_3_ClustSize_621_seq0_06__1	AGGAGTGTGAAATTTTCAGTATTTCACTTTCCATACGCGGGTTTAATGAATAAAGT	0	0	0	0	0	0	0	0	0	0	0	0	0	0	0	6.89476	6.89816	6.8977	0	0	0	6.56424	6.46501	6.39344	0	0	0	0	0	0
KchainBiClust_15039_1_ClustSize_3_seq0_06__1	AGCTACCAATCCTCCATCAAAATGAGTCCGTTTGAGGCACCTATGGAGAAAATGTCGTACTCCCTTGA	0	0	0	0	0	0	0	0	0	0	0	0	0	0	0	6.54465	6.52525	6.51749	0	0	0	7.22343	7.2314	7.25418	0	0	0	1.23788	1.26743	1.20074
KchainBiClust_12443_7_ClustSize_3_seq0_03__2	GAAATACGAAGCGCCTTTTGGCAGAGCCTGTGGTCACTGCTAGTGATCAAGTGAGGGGAAGAAGTTAGCGGTTCTAAGCTCCATCTCGGAGTTCGGTG	0	0	0	0	0	0	0.405465	0.645138	0.41871	0	0	0	1.11989	1.04145	1.26113	6.34838	6.29857	6.26141	0	0	0	6.8322	6.84489	6.86615	0	0	0	1.49549	1.40534	0.864997
KchainBiClust_24703_5_ClustSize_83_seq0_06__1	GACTAAAACTAACCTAACTCGGTACTAAGTCCTAGCGTCAGCATCTGTTCCCA	0	0	0	0	0	0	0	0	0	0	0	0	0	0	0	8.32866	8.28437	8.3058	0	0	0	9.28995	9.28466	9.28923	0	0	0	1.38629	1.81916	1.70475
KchainBiClust_14323_2_ClustSize_50_seq0_07__1	CGGTGTTTTTGATTTGGGGTTTCCCCGCGAGAGTTCTAATCTCTCAGGCGACGGTGT	0	0	0	0	0	0	6.96988	6.97155	6.72027	0	0	0	0	0	0	0	0	0	8.70428	8.61104	8.70061	0	0	0	0	0	0	0	0	0
KchainBiClust_151_3_ClustSize_3_seq0_01__3	AATGACAAGGGGGAATTATTTGGATGCCTATCCCCGGTGTCCTACCTACTACCA	7.38817	8.94215	7.95404	0	0	0	0	0	0	0	0.693147	1.07756	0	0	0	0	0	0	0	0.523248	0	0	0	0	1.53148	2.40356	1.02962	1.03407	0.693147	0
KchainBiClust_2085_0_ClustSize_53113_seq0_01__1	TCCTTAGAGAAGACAGACTTTTGGCCGGATTTCATCAACAGGTACAGAAGGCAAGACAG	6.96243	8.54167	7.30324	0	0	0	0	0	0	0	0	0	0	0	0	0	0	0	0	0	0	0	0	0	0	0	0	0	0	0
KchainBiClust_19143_1_ClustSize_1130_seq0_01__1	GGGGTAAGACAGACCACATTCCCTTCAGTTAGACACCCCGCACTAACCATCAGAAGGTCCCTCTGCTATGTGGCCAACATAACATCCAGGGAAT	5.94359	7.94595	6.57452	0	0	0	0	0	0	0	0	0	0	0	0	0	0	0	0	0	0	0	0	0	0	0	0	0	0	0
KchainBiClust_15217_2_ClustSize_8380_seq0_01__1	TCCCCTAAAGACTCAATATACTGCACATAGCCCCTCTACCCGGTTCTAGCTCCTCCCCGAATACTGGCTATAGGCTCTAGCCCC	5.97094	5.98614	6.03369	4.03645	4.10161	4.1906	4.39753	4.31665	1.4321	0	6.83814	6.90887	2.84054	3.09671	3.61826	3.25108	3.44275	2.70805	0	1.88031	2.02595	1.32914	1.06087	1.58697	3.30963	3.44601	3.63099	9.8674	9.89844	9.80947
KchainBiClust_15385_2_ClustSize_524_seq0_01__1	CCTCCCCAGCACACCTGAAATGGTTATGCTATGTGATCACTTACAAGAAGGGTAAGGACAAT	0	0	0	0	0	0	0	0	0	0	0	0	0	0	0	0	0	0	0	0	0	0	0	0	6.83936	6.8727	6.82558	0	0	0
KchainBiClust_12558_1_ClustSize_1249_seq0_02__1	CCGGCCGCCGTACTAATCCTGATTTGGCAAACAATCCTCCAAGCAGGCCTGGAATTTG	0	0	0	0	0	0	0	0	0	0	0	0	0	0	0	0	0	0	0	0	0	0	0	0	6.68232	6.71921	6.68648	0	0	0
KchainBiClust_15438_0_ClustSize_54_seq0_09__1	GATAGGATAAGCCTAATGAGGGAACTATTGCAATAGAGCTCGCGAACCTAATTATGATGATGGACCCTTATTGGTAATCCATAGTATGATCACTATC	0	0	0	0	0	0	0	0	0	0	0	0	0	0	0	0	0	0	0	0	0	0	0	0	6.55926	6.61058	6.55275	0	0	0
KchainBiClust_29888_0_ClustSize_723_seq0_01__1	ATTCACCAATACCACAGAAAAGAGACAATTGACCCCGCAGCAAGTAAAGTATCACAGCTGGAAGGTAAATCAGTCAAACATAGTGAAAGACAAGGC	0	0	0	0	0	0	0	0	0	0	0	0	0	0	0	0	0	0	0	0	0	0	0	0	7.40701	7.42867	7.36948	0	0	0
KchainBiClust_9359_8_ClustSize_12783_seq0_01__1	AATCTTCTTGAATGTTCTAGTACTCCCATGAATCTGATTAGAGAAGAAGAAACTTTAAATCTTCATCCTCAAAATGCCTTTGT	0	0	0	0	0	0	3.16003	3.10395	3.38439	4.76583	6.3391	6.32154	0	0	0	6.85789	6.84474	6.78784	2.62363	2.74544	3.23024	6.35188	6.37964	6.41591	0	0	0	0	0	0
KchainBiClust_2277_2_ClustSize_1691_seq0_01__1	TCCTTGCAAATCTTCAAAAGTTTAATCTGGCGCCCAACTTCATTTCCGGAAACATTCCTCAAAGTGCAGCAAATTTATCATCTCTTACCGGGCTTGATTTTTGCCAGAATGTATTCAACGGCAACA	0	0	0	0.646627	0	0	3.22883	3.65066	3.4012	5.27769	7.02968	7.01706	1.09861	0	0	8.11741	8.04937	8.10402	3.09104	3.14988	3.19527	7.41452	7.41968	7.40636	0	0	0	0	0	0
KchainBiClust_8161_1_ClustSize_15008_seq0_01__1	TTCCTCCCCGTACAAGTGTCACCCATCCCCTTCATTCCTCCATAAATTAATTATCTTTATTTCCCTCACCCACCTAGAGTACTCCTGAAT	0	0	0	0	0	0	3.51019	3.46004	3.19309	5.94447	7.59333	7.62861	0	0	1.09861	7.88809	7.82335	7.88721	3.29584	3.35785	3.77797	7.21557	7.27536	7.26186	0	0	0	0	0	0
KchainBiClust_1599_3_ClustSize_62520_seq0_01__1	TTCCTCGCATCCGATCTCCTCAATTCTGATCTAGTCCGACCACTCTCGGTATGTCTCCATCTCCATTTTCACCACCTTCCTCGTCACTTAA	0	0	0	0	0	0	0	0	0	6.86459	0	0	0	0	0	0	0	0	0	0	0	0	0	0	0	0	0	0	0	0
KchainBiClust_14090_5_ClustSize_5565_seq0_01__1	ATCACCCCAAGGGAGGGTGAGGTAGAACCACCTGAAGAAATAGAAAGGGAACATATACCAGAACCTAGCCCTTCGCCTAATCTGA	0	0	0	0	0	0	2.93119	2.66259	2.80336	4.70123	6.12851	6.13304	0.969399	0	0	7.534	7.46847	7.50549	2.57769	2.584	2.84297	6.77413	6.78125	6.76513	0	0	0	0	0	0
KchainBiClust_8161_2_ClustSize_15008_seq0_01__1	ATTAATTCCTAAAAATCCTCCCCGTACAAGTGTCACCCATCCCCTTCATTCCTCCATAAATAATTA	0	0	0	0	0	0	1.93393	2.13021	1.34373	4.01036	5.5978	5.69036	0	0	0	7.02324	6.96595	6.99492	2.16905	1.96944	1.59263	6.50291	6.53246	6.5506	0	0	0	0	0	0
KchainBiClust_1646_4_ClustSize_1043_seq0_03__1	GGCTTTGTCTCTACCTGCTGAGAGTAGACAAAGCCTCGAAATAGTTACACATCATTGGTGAAATGGTAAAGGTGTACAGAAATTTGGGGCCAACGACTGA	0	0.663296	0	0	0.606134	0	3.27825	3.52981	3.50538	5.67534	7.37411	7.38037	0.485508	0.538999	0.826677	9.48871	9.40502	9.45665	3.4012	3.70782	3.46205	8.64271	8.61468	8.60141	0	0	0	0	0	0
KchainBiClust_15494_0_ClustSize_5491_seq0_01__1	GCAAACGACTATGGTTGATGAAGGTGCCTCCGCGTCAGTAATGTCGTTAGCTTGTTGGAAAGCTCTTGGCTCTC	0	0	0	0	0	0	1.70475	1.8563	1.84253	4.16957	5.65095	5.51996	0	0	0	7.51053	7.57827	7.51701	1.42139	2.23805	2.13614	6.72788	6.671	6.69418	0	0	0	0	0	0
KchainBiClust_12587_3_ClustSize_1877_seq0_02__1	GATACACCTCCTATATATACCATCTGTTCCTGTTCAACCAGCCAGCTACCTTCTCTGTCCCTTTGAGGCCACTCAACGCCCAAGGAACCCAAGTCAGTTGTTTTTTG	0	0	0	0	0	0	0	0	0	0	0	0	0	0	0	7.5864	7.52706	7.57151	0	0	0	8.67081	8.67768	8.66129	0	0	0	0	0	0
KchainBiClust_16514_0_ClustSize_366_seq0_01__1	TCTATATTGTCTTTTATCGCAACATGATCCTGAATAAAGAGAAACGCACACTAATTCCACGGAAATTAAGTTAGCAGCCAGCGATATGTCATTAGCAATCGAAGGTTGCAGGAAGGAA	0	0	0	0	0	0	0	0	0	0	0	0.567986	8.54703	8.5584	8.53778	0	0	0	0	0	0	0	0	0	0	0	0	0	0	0
KchainBiClust_9102_1_ClustSize_9_seq0_05__1	GCATGTAAGTTCTCATAGTTGCATGTAGCATAATAAATGTATTACAATCATAAAATGACGCATGCAATAGCAGATAAGACCAAAAACTCAATATTATGAAGAATATCAGTGCATGCGTGGGAATACAAATCGCCTACTGAAATATTCAACTA	0	0	0	0	0	0	0	0	0	0	0	0.606134	6.89967	6.91203	6.86554	0	0	0	0	0	0	0	0	0	0	0	0	0	0	0
KchainBiClust_16802_1_ClustSize_847_seq0_01__2	AGCCCTTCTCGACCCAATCCCACTTCTACTCCAACAAGAGCTGACGCTAAACCATCACCTACCGATTCCCTTGCAA	0	0	0	0	0	0	0	0	0	0	0	0	9.47337	9.48216	9.47053	0	0	0	0	0	0	0	0	0	0	0.693147	0.693147	0	0	0
KchainBiClust_16905_0_ClustSize_10_seq0_09__1	ATGGAGCCCCTCCCAATGGTGACATCATATCTTCCTTTGATCCTCTCTCCTCCACTGGTATACCATTGGTATTTTTCACCTCTATGCTTGCATTGAACTTAGGTTGAGCATGT	0	0	0	0	0	0	0	0	0	0	0	0	0	0	0	0	0	0	0	0	0	0	0	0	6.58936	6.55356	6.51448	0	0	0
KchainBiClust_1720_0_ClustSize_1998_seq0_02__1	CAATCATGTGTCAACTACTCATCAATATGTACCATAAACAAGTGCATCCAACCAATCATCAATATACA	0	0	0.581919	0	0	0	0	0	0	0	0	0	0	0	0	8.1051	8.06935	8.06727	0	0	0	9.80159	9.80039	9.78992	0	0	0	0	0	0
KchainBiClust_17621_1_ClustSize_3_seq0_09__1	TCCAAGTGGTTTGGGTTAGTACAATTATTGATTTCATAATGAAGGTTGAGCACTAGCCCGATATTTGGCAATGCTCATATTGTTCTTTAAGCTAATAATGTTAGAAAAATA	0	0.940983	0	0	0	0	0	0	0	0	0	0	0	0	0	0	0	0	0	0	0	0	0	0	6.90213	6.87375	6.87755	0	0	0
KchainBiClust_6768_1_ClustSize_327_seq0_05__1	AATAGCAGGACGAGGGCTAACCGGCGGACTAACATAAGAGTGCATGGCGCACGAACCAGCTAGCGATACCCCTTTCCTTTGATGGGACACCAGTTCGGGTAGAC	0	0	0	0	0	0	0	0	0	0	0	0	10.6863	10.6966	10.698	0	0	0	0	0	0	0	0	0	0	0	0	0	0	0
KchainBiClust_1720_2_ClustSize_1998_seq0_02__1	CAACCTTACCAATCATGTGTCAACTATGACTCGTCAATATGTACCATGAACAAGTGCATCCAAACATGTACC	0	0	0	0	0	0	0	0	0	0	0	0	0	0	0	7.37938	7.34273	7.34079	0	0	0	9.02399	9.02068	9.00851	0	0	0	0	0	0
KchainBiClust_19554_0_ClustSize_119_seq0_01__2	TCTTCTGGCAAGATTGTGAGTCTTATTTCTTACACTCTCTTCTTTTCTCTCCGCCGACCTCGTGTTGCCTACTCTGCTACACCATTCATCAAGTTTTTTTTAGCTGC	0	0	0	0	0	0	6.70802	6.71302	6.70603	5.20603	5.84018	5.73453	0	0	0	0	0	0	7.08713	7.00345	6.97492	0	0	0	0	0	0	0	0	0
KchainBiClust_3091_2_ClustSize_5_seq0_06__1	AAGCATAAGAGATGGCTAACACACCAATATCCAACAGGTTCGACCCTATGGCGAATTCGGATGGCAAAAGGTTCAAATGCAACATAACAG	0	0	0	0	0	0.693147	2.87168	2.70805	2.7908	3.03855	2.91099	3.43197	5.98305	5.89853	6.04418	8.01174	7.98559	7.99178	2.80714	2.71753	2.61648	9.06545	9.09699	9.07284	0	0	0	3.22552	3.49651	3.70926
KchainBiClust_8079_1_ClustSize_3_seq0_06__1	TAGATATATTAATTGATTCTTGCAAATGATGTGCCTTGTCAAATCATTTGAGTTAGGTCACCATTATATGTGTATATTTACCACAAAATTTTTGGA	0	0	0	0	0	0	2.51645	2.11718	2.26336	5.40568	4.9712	5.03343	6.44182	5.98063	6.03317	6.53467	6.4545	6.49774	1.88454	2.47848	2.48491	7.41247	7.36632	7.38872	0	0	0	5.45247	5.48563	5.3273
KchainBiClust_18345_1_ClustSize_450_seq0_06__1	CTTCACAACGTTCTGTTCGCGAAGCGTCTGCTGCAACTGCAACCCGTTCAAGCTGTCGCACCAACCTCCGCGT	0	0	0	0	0	0	2.28317	2.35815	2.60533	1.05779	1.47998	1.77374	6.94721	6.93068	6.87966	7.62329	7.58566	7.59428	2.78454	2.82053	2.98643	8.46985	8.45852	8.44537	0	0	0	3.33983	3.08779	3.20695
KchainBiClust_382_0_ClustSize_148_seq0_04__1	GACAAAGAGGTTATCTGTTCTGAATTTCCAAACAGCAATGAAAGAAGGATGCTATGGAGCCGTAACAGAGGGCCAGGTACATCACAGGTACGTCTCATTTTTTATATATTCATGAAT	0	0	0	1.31568	1.33977	0	1.97155	1.31568	1.31568	4.76217	5.44987	5.40268	5.62402	5.45649	5.62664	6.08077	6.11006	6.11368	1.26567	1.03609	0.693147	7.17542	7.1958	7.16942	0	0	0	4.82977	4.67453	4.70953
KchainBiClust_13225_2_ClustSize_169_seq0_09__1	TGTCGCTTGGTTAATGTATAAGGCATTTGAGATTTCTTACTTTATGGATGTCAGCTTCCCTTCCATTTCTTTGTTTACTGTGTTAGAA	0.9904	0	0.650589	0	0	0	0	0	0	0	0	0	0	0	0	0	0	0	0	0	0	0	0	0	7.97236	7.96458	7.96789	0	0	0
KchainBiClust_31710_1_ClustSize_172_seq0_09__1	CCATAGACCACCTGAACGAGTTCATAACCAACACGCCGACAATGAAGGCGAGGTCAGCATAGCGACAGACCTCGAATCAAAGATAAACCAAACTGTGCGC	0.635989	0.635989	0.929535	0	0	0	0	0	0	0	0	0	0	0	0	0	0	0	0	0	0	0	0	0	8.12962	8.08564	8.11755	0	0	0
KchainBiClust_17621_2_ClustSize_3_seq0_09__1	AACAGTCTCAATGCTAGGACACTAGCCGATCTTTCATAGTTTTTCATCTGAGCAGACTTTCAAGATTATCTACTCCTAACAGGCTTTCAA	0	0.223144	1.03609	0	0	0	0	0	0	0	0	0	0	0	0	0	0	0	0	0	0	0	0	0	7.9966	7.99132	8.01451	0	0	0
KchainBiClust_12092_0_ClustSize_1955_seq0_01__2	TGTTGACATGTAGAGGATGAATCCGATGGATGTTGAGAAAGTTTCCGTAAACCCTAATTGTTGGCTTCAACGCATTTTTCTCCACTGCATGCCTGTGATGACGGTGGGTTGCTCAGATACGGAAC	0.693147	0	1.58045	0	0	0	0	0	0	0	0	0	0	0	0	0	0	0	0	0	0	0	0	0	8.53037	8.47491	8.4985	0	0	0
KchainBiClust_5881_1_ClustSize_3_seq0_07__2	TTCGCCAGGTTGCGAAGGAGTTCTATTGGACAATGTCACATGCACTGCTACATAGATCCACTTTGTATTGGTCGTGGCTA	0.693147	0.646627	0	0	0	0	0	0	0	0	0	0	0	0	0	0	0	0	0	0	0	0	0	0	7.54972	7.54152	7.55904	0	0	0
KchainBiClust_28321_0_ClustSize_1225_seq0_01__1	TAAGGGCCGGATACTATTGGCCGAAACTATTTTCCGACGTTAATGCCAAAGTACGTGCCTGTCATTCATGTCAAATTTTCGCTGGTAAACAAAAACTCCCGGCACTACCACTCGTCCCGGTCAAAACGAATCCC	1.20397	0.587787	0.980831	0	0	0	0	0	0	0	0	0	0	0	0	0	0	0	0	0	0	0	0	0	8.0132	7.97511	8.00964	0	0	0
KchainBiClust_12610_0_ClustSize_1868_seq0_01__1	CTTCGATCTCCTTTCTGTGTATCAAATGACACATACTGGTGAACCAAAGCAAGTCACATTCAGCCCTAATACAGTTGAAATTTCTGATATCAAA	0.587787	0.693147	0	0	0	0	0	0	0	0	0	0	0	0	0	0	0	0	0	0	0	0	0	0	7.79758	7.74721	7.76866	0	0	0
KchainBiClust_7402_0_ClustSize_12_seq0_09__1	TGCTTCAACTGTCAAAAGTACGGTCACTACAGGAACCAGTGTCCCGAGCTAAAGAAAAGGAAGAGA	0.693147	1.00552	1.1977	0	0	0	0	0	0	0	0	0	0	0	0	0	0	0	0	0	0	0	0	0	8.02893	8.01463	7.98193	0	0	0
KchainBiClust_29080_2_ClustSize_168_seq0_09__1	GGGTTTTTCACTCGATCATGTCGAAGGCCCAGAGACCCATACCTAATGCTAAAAATATTCTACTGGTACCCATA	0.656779	0	1.83525	0	0	0	0	0	0	0	0	0	0	0	0	0	0	0	0	0	0	0	0	0	8.20571	8.1913	8.20522	0	0	0
KchainBiClust_671_4_ClustSize_101_seq0_09__1	CAGAAATTACAGGATTTGACCAAATCCCGTAAAAGCTCCTGGTTTTATACTTGCAGGACACCTGGG	1.09861	1.05861	0.664974	0	0	0	0	0	0	0	0	0	0	0	0	0	0	0	0	0	0	0	0	0	7.57487	7.58206	7.58863	0	0	0
KchainBiClust_15385_0_ClustSize_524_seq0_01__1	GGGTTATCCAACTCATGGGTTATGCCTATGTGATCACTTACAAGAAGGGTAAGGACAAATGGTG	0.635989	1.02165	0	0	0	0	0	0	0	0	0	0	0	0	0	0	0	0	0	0	0	0	0	0	7.12585	7.10102	7.11493	0	0	0
KchainBiClust_7520_3_ClustSize_4260_seq0_01__1	ATGAAATTCACAAAATCACTAGTTCGACCTTGGGGGAAATGGCATCAAATCTTCTCCAAATGCAAT	1.29098	1.06471	1.29098	0	0	0	0	0	0	0	0	0	0	0	0	0	0	0	0	0	0	0	0	0	8.20951	8.17719	8.16092	0	0	0
KchainBiClust_18614_7_ClustSize_6_seq0_09__2	GTCCGAAGGAGGCTCGTAAGCTTGACCTCTCTGAAGGATTTTCTTGGGTTGATCGTTGG	1.14862	1.29392	0.693147	0	0	0	0	0	0	0	0	0	0	0	0	0	0	0	0	0	0	0	0	0	7.8183	7.7717	7.78787	0	0	0
KchainBiClust_18786_0_ClustSize_3_seq0_01__2	CTGTTGGGGTGATATAAGGTGATTGTTTACTTATTCTGGTGACATAAGGT	0.693147	0	0.99853	0	0	0	0	0	0	3.62656	0	0	0	0	0	0	0	0	0	0	0	0	0	0	6.92102	6.93429	6.94677	0	0	0
KchainBiClust_18941_7_ClustSize_4_seq0_06__1	TTTTGTGTAGGTAACACTCTACTTAACAAGTTCATTGCAAAGGGTTTTGTGAATTAGACAGGATCATCTCTCTAGAGAAGT	0	0	0	0	0	0	0	0	0	0	0	0	0	0	0	5.71389	5.64478	5.66807	0	0	0	7.0104	7.05519	6.99916	0	0	0	0	0	0
KchainBiClust_15609_0_ClustSize_44_seq0_06__1	TTGCCTTGAAAAGTGTGTCAATTTTAACCCAATCACCACCAAACTATAGAGGTGGTTTTT	0	0	0	0	0	0	0	0	0	0	0	0	0	0	0	5.76497	5.69613	5.75687	0	0	0	7.10173	7.11888	7.09607	0	0	0	0	0	0
KchainBiClust_19223_0_ClustSize_4547_seq0_01__1	TTTTGGCCCCATCTATTGCCATTAACAGCCCGGAATTCTCAATTTTCGGCTTCCGTGCAGGCTTT	0	0	0	0	0	0	0	0	0	8.10457	0	0	0	0	0	0	0	0	0	0	0	0	0	0	0	0	0	0	0	0
KchainBiClust_8339_0_ClustSize_3_seq0_06__2	TGTGTTTTTCTTGGTTGACTCATAAACTGATAAGCAACTCACTGCATAGCATATATCAGGTTTGATGTTAACAAGATGCATCAATGATGCAGTCATATGTCTGTAAATATGTGGATCAATATCACCCAAATC	0	0	0	0	0	0	2.82034	2.60577	2.37878	0	0	0	0	0	0	5.84488	5.7007	5.70314	1.03889	0	0	6.66387	6.68553	6.64879	0	0	0	0	0	0
KchainBiClust_21059_5_ClustSize_21_seq0_06__1	CAGAGGTTTTGTTAAGACCCGCGCTCCGAGCTCCGAACGATTCGCCATTCGGGTGACTAGTGTGTG	0	0	0	0	0	0	2.14007	1.46634	1.93634	1.60944	1.41908	1.47182	0	0	0	5.57897	5.56273	5.47702	0	1.45529	0.579816	6.65432	6.65775	6.63077	0	0	0	0	0	0
KchainBiClust_4076_2_ClustSize_3_seq0_06__1	ATTGATTCAAATTATGGGATCATGGCACACTGGGAACAAATGTATCCAAGTATTGAT	0	0	0	0	0.646627	0	2.6897	2.46192	2.68351	0	0	0	0	0	0	6.87783	6.91121	6.86999	2.31163	2.19722	2.09074	7.88929	7.88796	7.88321	0	0	0	0	0	0
KchainBiClust_20195_3_ClustSize_6_seq0_06__2	TGGGAGTGATGGTGGTAGTTGTAGAAGTTCATAGTGGGAGAGTGGCATATCTGGGATCCGCCGTAGAGTGTATGTGTGAA	0	0	0	0	0	0	0	0	0	0	0.510828	0	0	0	0	5.87032	5.92073	5.94471	0	0	0	6.96769	7.00422	6.93634	0	0	0	0	0	0
KchainBiClust_5828_4_ClustSize_54_seq0_06__1	ATAGCGGGCCCTAGTGGGACTAGCCATGATGAAGAAGATCATCAGAGCAAC	0	0	0	0	0	0	0	0	0	0	0	0	0	0	0	5.59657	5.32909	5.32179	0	0	0	6.49536	6.55678	6.58332	0	0	0	0	0	0
KchainBiClust_4916_2_ClustSize_238_seq0_01__2	AGGGAATGTTGTTGGTGGCAGGGATGCGTGCATCGGGTGTACAGAAATCGAGTTGATCGATGGTAACAATTTTGCCTTGATGAGGGAATTGTACACTCGAAAACCGATGAAGCAACGGCAG	0	0	0	0	0	0	0	0	0	0	0	0	0	0	0	5.29968	5.28367	5.43054	0	0	0	6.67238	6.60739	6.65941	0	0	0	0	0	0
KchainBiClust_11232_6_ClustSize_5_seq0_02__1	AATTTGCAGATTTTAAAACTTCAATATGTTGACAAATTGAAGCTGCACGTTTCGGACTATTGTTTTTT	0	0	0	6.83087	6.76641	6.8131	0	0	0	0	0	0	0	0	0	0	0	0	0	0	0	0	0	0	0	0	0	0	0	0
KchainBiClust_2052_2_ClustSize_486_seq0_01__1	TGCAGCGCCGCCGACGCCCACGGAACTTACGCCTTTTTTCCTTCTTCTCCTGCTTCCTCTGGTTCAGACGCTGCCAGATCAAGGACGAGGCCGCGGCGGAGGGG	9.15074	9.15468	9.14729	0	0	0	0	0	0	0	0	0	0	0	0	0	0	0	0	0	0	0	0	0	0	0	0	0	0	0
KchainBiClust_31045_2_ClustSize_3_seq0_01__3	TACAGAAATTATTTTTCAGGTGAGGAGGGTCCATCTTGTACAGAATTGATCCAACCTGCGTCCCATGTTCCTGTTTTAATGTTTCCATGGCTACGTTGGCTCC	6.73301	6.74819	6.73618	0	0	0	0	0	0	0	0	0	0	0	0	0	0	0	0	0	0	0	0	0	0	0	0	0	0	0
KchainBiClust_20721_1_ClustSize_1751_seq0_01__1	TGAGGCATTCCCTCGGAGGTCGACAAATACTTGAAAGAGCAATTTCGTGAGATGAGGAACATGCATACTCACATCCGAAGTGCTCTAGACTTACAATTTGTA	7.79832	7.77902	7.75887	0	0	0	0	0	0	0	0	0	0	0	0	0	0	0	0	0	0	0	0	0	0	0	0	0	0	0
KchainBiClust_2085_1_ClustSize_53113_seq0_01__1	ATGCGCAATTACAGAAATGGCAGATCCTGACACTATGAATGAAAGACTTTTGGCCGGATTTCATCAACAGGTACAGAAGGCAAGA	0	0	0	0	0	0	0	0	0	7.61902	0	0	0	0	0	0	0	0	0	0	0	0	0	0	0	0	0	0	0	0
KchainBiClust_23227_1_ClustSize_11_seq0_09__1	TTATTTTATTACAATTTCTGAATTCTGTATTATTTCGCATGTTTGAATTGTAAATTTTTGAAATCTGTTTTTTTTGCAGGTTTCAATTTC	0	0	0	0	0	0	0	0	0	0	0	0	0	0	0	0	0	0	0	0	0	0	0	0	7.35569	7.38428	7.39903	0	0	0
KchainBiClust_31045_0_ClustSize_3_seq0_01__3	TACAGAAATTATTTTTCAGGTGAGGAGGGTCCATCTTGTACAGAATTGATCCAACCTGCGTCCCATGTTCCTCTTTTAATGTTCCAT	0	0	0	0	0	0	0	0	0	0	0	0	3.46999	3.25501	3.26728	0	0	0	0	0	0	0	0	0	0	0	0	8.81366	8.83225	8.82674
KchainBiClust_20964_1_ClustSize_34_seq0_06__1	AAGCCGTCAGACAGCATTGGTGGCCGAGTGAAACCCCTGAAATGTTAGGAAGTCGCACATACCTGGGGTCCACTCTATT	0	0	0	0	0	0	0	0	0	0	0	0	0	0	0	9.68741	9.63302	9.65183	0	0	0	9.53844	9.52484	9.45557	0	0	0	0	0	0
KchainBiClust_12470_0_ClustSize_3055_seq0_06__1	CTTTTGTATGTAAAATACTGCACCATGAAATGGGCTTTTACCACAGATTTGAAATA	0	0	0	0	0	0	0	0	0	0	0	0	0	0	0	10.2549	10.2188	10.23	0	0	0	10.0584	10.0598	10.0157	0	0	0	0	0	0
KchainBiClust_17071_6_ClustSize_6_seq0_03__1	AAAATGTCATCAACCAACCATGTACCATAAAGTGGCTACAAATATATAGAGTTACATCATAAATTCAAATTTCTATGGAGGCATTCGAATTAGTCACAAAA	0	0	0	0	0	0	6.5163	6.49289	6.60181	0	0	0	0	0	0	0	0	0	4.90263	4.95129	4.93241	0	0	0	0	0	0	0	0	0
KchainBiClust_21903_4_ClustSize_228_seq0_03__1	ATTATATTGGAGTGTTTTGATCTTTCACAACATTCTCATTACAGTAAAGGCAGATAAAATCACGTTGAAGTTGATCCTAAATGTTAACTGACCTTGGA	0	0	0	0	0.570544	0	8.42672	8.3862	8.33293	0	0	0	0	0	0	0	0	0	9.3035	9.20822	9.30172	0	0	0	0	0	0	0	0	0
KchainBiClust_22328_1_ClustSize_507_seq0_06__1	TAATGTACTTTTTGCATCGGATCGTTAAGAATGTGAAATACATAAACTTGTTATCTTGTTTGCGGAATATCAAATGTGACTTTTACTTGATGCTTATTATGTATA	0	0	0	0	0	0	0	0	0	0	0	0	0	0	0	7.36016	7.34125	7.25173	0	0	0	7.33004	7.26562	7.27246	0	0	0	0	0	0
KchainBiClust_1847_0_ClustSize_3_seq0_06__1	ATGCTACTACCACAACAGCAGGGGCCGGACAGCGCAGCCGGAGCATCAGGCGTAGTGAGACCAGCTCCTCCAAACGCAGCGAATCCCTTCCAACACTATGTGCTCACAGCTGCAAATCCGAGCA	0	0	0	0	0	0	2.44054	2.19294	2.20166	0.840303	1.29721	1.10599	2.63906	2.18627	2.35138	6.36746	6.3534	6.42887	2.32728	2.21557	2.48877	7.08108	7.061	7.06406	0	0	0	0.735708	1.39322	0.683486
KchainBiClust_8224_2_ClustSize_53_seq0_06__1	ACGTTGGGCAGATTTACTTGAGCGTTTGGAATTCCGTCTGCAGATCTGAATTCGCCCTGCCCAGCCCTACCTGCTCAAACCCTAGCGTTCAGTTTG	0	0	0	0	0	0	1.01983	1.09861	0.829281	0.834799	0.891998	1.2004	3.72483	3.89182	3.91131	6.87516	6.89113	6.88375	0.860203	0	0.841567	7.94796	7.95155	7.94851	0	0	0	1.55228	0	1.38629
KchainBiClust_850_0_ClustSize_3_seq0_06__1	TCCATGATCTACATGAATCGTACCTTTGCCCTTTGAAGAAATTTTTGAGTCATCTCCCAAATGGATGGGGTGGAGC	0	0	0	0	0	0	3.1209	3.33458	2.76841	2.33537	2.91597	3.16003	4.2697	4.49494	4.46996	8.49563	8.43478	8.44758	3.43894	3.45263	3.68387	8.81548	8.80232	8.80962	0	0	0	0	0.575365	0.653928
KchainBiClust_24786_5_ClustSize_161_seq0_03__2	CTCTGAGATATTACCTTACGGACTTGGCCGGACTCCTCCTGCCCTTCCCAATAAAAATATCCATTAGTGGCTCC	0.693147	1.57554	0	0.693147	0	0	0	0.430782	0	2.62708	2.98801	2.92399	0	0	0	6.43368	6.43541	6.36845	0.9904	0.613102	0.646627	6.84088	6.85037	6.82429	0	0	0	0	0	0
KchainBiClust_12609_0_ClustSize_1161_seq0_01__1	GGGTCCGAAGTTGGGCTGGCGTACGAAGGGAGAGTTGTGACGCGAATTTCTTATCAAATTCGCCCTAATATTTTCGGGTC	0	0	0	0	0	0	0	0	0	0	0	0	9.88437	9.87501	9.87245	0	0	0	0	0	0	0	0	0	0	0	0	0	0	0
KchainBiClust_4955_1_ClustSize_127_seq0_05__1	AAAACACATTTCGAAGTGGACGCGTCGATCTGGAGAATGTATATTTTTTTGGATGTGTATTGTGAATGTTGTTGATTTATCATTGA	0	0	0	0	0	0	0	0	0	0	0	0	7.1804	7.21598	7.23297	0	0	0	0	0	0	0	0	0	0	0	0	0	0	0
KchainBiClust_22884_0_ClustSize_3_seq0_06__1	CTGATGATATTCCTTACTGGCTTCAGCAATGGCAGCAGCACTCCTTCGCCTCGATCGTCCTAGGGTTACGGTATAAAGAAGGTCAGAGTTGGTTTAATGCATTCCATCCATACTGTGTACTTTTGGAA	0	0	0	0	0	0	0	0	0	0	0	0	0	0	0	7.00396	7.00092	7.02099	0	0	0	7.24234	7.23995	7.23232	0	0	0	0	0	0
KchainBiClust_5812_1_ClustSize_3_seq0_06__2	TTTTAACCCCTTAAAACATGGAATGATGTCCACAAGGTAGAATTCACCAAAGTAAGAATCTGGGGGTAGGTTATCAAGTGGGACTCACCA	0	0	0	0	0	0	0	0	0	0	0	0	0	0	0	7.32358	7.2896	7.29353	0	0	0	7.54114	7.53661	7.53597	0	0	0	0	0	0
KchainBiClust_2290_3_ClustSize_3_seq0_02__2	CAGCACTTCACTTTGCTGTTATATGCACCCATCTCTTAACAGCCTGAGAAACCCAATTTCTGATTGGCTTGGCTGAT	0.653928	0	0	7.11556	7.10988	7.15014	0	0	0	0	0	0	0	0	0	0	0	0	0	0	0	0	0	0	0	0	0	0	0	0
KchainBiClust_25466_0_ClustSize_3_seq0_02__2	ATTGTCTATGGTTGGGAGGTGATAGATCATCACTGTGGTTAAACGACCTCCATAATCATTGTCTTCCTATG	0	0	0	7.5203	7.48755	7.47	0	0	0	0	0	0	0	0	0	0	0	0	0	0	0	0	0	0	0	0	0	0	0	0
KchainBiClust_23027_0_ClustSize_648_seq0_01__1	ATCATTATTAGAACCTTCCACACTAATTTCAGATCGTAGTCGTTAGCCAC	0	0	0	0	0	0	0	0	0	0	0	0	0	0	0	0	0	0	0	0	0	8.97332	8.90633	8.65715	0	0	0	0	0	0
KchainBiClust_23082_0_ClustSize_16_seq0_06__1	AGCCATAAATAATGTGGTTTGGTTTATAAAAGGCGAACGTTGATTCGAAAGGGAGGTCAAGCCGAAGTATGAATTGTCAAT	0	0	0.435315	0	0	0	0	0	0	0	0	0	0	0	0	7.1581	7.05238	7.12577	0	0.693147	0	7.88564	7.88156	7.88179	0	0	0	0	0	0
KchainBiClust_23176_5_ClustSize_11_seq0_06__1	AGTACGGATTGCGAGACCAAAGGGAGAGAGAGGGGAATGGGGTAACTTTCTCTCAGGTAAGATTATTGAACAGACGGCTATGATTGAAC	0	0	0	0	0	0	0	0	0	0	0	0	0	0	0	6.63295	6.75091	6.73999	0	0	0	6.90369	6.85541	6.87598	0	0	0	0	0	0
KchainBiClust_11527_1_ClustSize_21_seq0_06__1	GGATCATGACATGTACTCGGCAATGTTATTGGTGGTGCTACCTAGGAAAATTCCCCCAGAACCAAGAAGTTCTGACTCAGGAGTGTAGAGAACCCAAGCAGCTGAGGTAAT	0	0	0	0	0	0	0	0	0	0	0	0	0	0	0	9.16265	9.13015	9.14419	0	0	0	9.23378	9.20231	9.18194	0	0	0	0	0	0
KchainBiClust_216_1_ClustSize_3_seq0_06__2	CGCCTCCGAGATGAGCTCCTGCAAATGGCCCTAGGCCAATCTTTGGGTGGACCCAACATGCAGCTCCT	0	0	0	0	0	0	0	0	0	0	0	0	1.60944	1.30992	1.7492	6.4484	6.36984	6.4421	0	0	0	7.20579	7.24493	7.21524	0	0	0	1.65068	2.21417	1.57818
KchainBiClust_1058_0_ClustSize_3_seq0_06__1	GTTGGATTCAGCACACCGGGATAGTGCCAGGGGTGCCCCTCCCCTCCTACCCGGTGGCCCATGTGTCACCTTGCAGGTCCATCTTGGAAACTAGGGTTTTGCCAGTGTG	0	0	0	0	0	0	1.05779	0.693147	1.6007	0	1.22867	0	0.693147	0.635989	0	7.06636	7.00397	7.02155	1.72551	1.1914	1.16575	7.09049	7.07682	7.06959	0	0	0	1.07992	1.05315	2.35815
KchainBiClust_26811_0_ClustSize_8_seq0_02__1	ACTATTTTTATTATTTATCGACACATGTTTTTGTCTTCGCATTTTCTTTCAAATGTGACTCTTAT	0	0	0	6.47888	6.55067	6.43462	0	0	0	0	0	0	0	0	0	0	0	0	0	0	0	0	0	0	0	0	0	0	0	0
KchainBiClust_274_3_ClustSize_3_seq0_03__1	ATGATAGCCGTTTTGATGGAAGCGGTTAAGTTGCAAGAATGTGGAAGCTATCCTCGTGACATAGTCACGAGGATGAG	7.21077	7.11216	6.99597	7.28764	7.24047	7.12239	6.5965	6.67894	6.65503	5.81996	6.18528	6.11444	0	0	0	0	0	0	6.10497	6.13875	6.10819	0	0	0	6.85927	6.71834	6.72875	6.46407	6.55962	6.47833
KchainBiClust_26762_3_ClustSize_956_seq0_01__1	CGTTTGATGCAACAAAATCAAGTAGAGTGGATATGATGACTTTTGGTGCATATTTTAGACGTTTGACACAAAAAA	0	0	0	0	0	0	0	0	0	0	0	0	0	0	0	5.92595	5.88787	5.82466	0	0	0	6.92023	6.87917	6.89816	0	0	0	0	0	0
KchainBiClust_21412_3_ClustSize_1898_seq0_01__1	TATTGAGCTCGAATTTCTCTTTGGATGTCAGAGTGGGCATCCATGGTCGTCACTGCAAACAAAAAATAAAAATCATTAGAAACGTAT	0	0	0	0	0	0	6.82093	6.86119	6.84845	0	0	0	0	0	0	0	0	0	7.26298	7.31122	7.26327	0	0	0	0	0	0	0	0	0
KchainBiClust_24424_0_ClustSize_7454_seq0_01__1	GTTGAAATGAAGCATCGCACCCTAAGGAGTCTACACCGGGAAATGCTTCAGAAAGAGG	0	0	0	0	0	0	0	0	0	8.83288	0	0	0	0	0	0	0	0	0	0	0	0	0	0	0	0	0	0	0	0
KchainBiClust_12841_5_ClustSize_3_seq0_02__1	ATGGGATCAGGTGTGATCTTTGGTTAGCAGGAAGCAGTCCTGCGTAGCACTGAGTACAGCCAAAGCAGAGT	0	0	0	7.10226	7.03448	7.12059	0	0	0	0	0	0	0	0	0	0	0	0	0	0	0	0	0	0	0	0	0	0	0	0
KchainBiClust_28394_0_ClustSize_2720_seq0_01__1	ATTAATTAACAACTTATTGTATTTAAAAAAATACTAGTGCACACATGGAGGGTATGTATGCATGGCTGCCGGACACATTGTAGTGATAATGACAGTCACTACCTCTGATGCATAGTTCTTGTA	0	0	0	0	0	0	0	0	0	0	0	0	7.1329	7.13787	7.17204	0	0	0	0	0	0	0	0	0	0	0	0	0	0	0
KchainBiClust_27438_2_ClustSize_36_seq0_01__1	AAATAAACGAAGTAGGATAGGATCGTGAACTGTGTAAACACGATTCAGATGGAAACC	0	0	0	0	0	0	0	0	0	0	0	0	0	0	0	0	0	0	0	0	0	0	0	0	0	0	0	6.9475	7.00083	7.03276
KchainBiClust_2547_0_ClustSize_29_seq0_06__1	TCACGCCCCCTCCCCCTCTTCAACGGACATCACCGATGATCCGAAGCCGACAGGGCCCAAGAAGGCTCGAAAATGAAAGTGCCCCGAATCCGACGAAACCGGCGCCATTGCGTCCGTCTCCTCTCCCTGATTCCGGCCATATATCTACTTCGTCAAGCGGGCTCCGTATGCGAAAGACATCGCGTTCTGTCCGAAAAC	0	0	0	2.77704	2.54833	2.55305	0	0	0	0	0	0	0	0	0.606134	5.83481	5.89499	5.89381	0	0	0	6.71217	6.7406	6.7703	0	0	0	0	0	0
KchainBiClust_24_0_ClustSize_6_seq0_04__1	GCGCTCGCCCTGGTCGTCCGCAGCCGTTGCGAGGTACTAAAGGGCTCGTTTTGGTATGTAGGTG	0	0	0	0	0	0	0	0	0	6.71593	0	0	0	0	0	0	0	0	0	0	0	0	0	0	0	0	0	0	0	0
KchainBiClust_25092_1_ClustSize_276_seq0_03__1	ATGAATTGGATCAATCATCCAAGCATGACACAAAGTAGGGACAACAAGTGAATAAGACAATGATACATATTATAATCAACGGACGATAAAGGGACAA	0.594707	2.42037	1.37055	2.5819	2.68558	2.22762	5.63386	5.54024	5.49091	6.23951	6.56936	6.54859	6.00248	6.02405	6.04489	0.880357	0.587787	0	5.78529	5.64698	5.88017	1.20397	0.980831	1.60944	4.09101	4.29242	4.15739	5.08075	5.16479	5.17853
KchainBiClust_25140_1_ClustSize_41_seq0_10__1	GAAGTCTTTACACCACCTCCACAGATACAAACCACTGATCCTCTTGCGGAATTTCGAATTACCAATACTATAGAGGATTATCGCATTCGTCGTGGTGAACGACCTTCAGGGCGGTTTCATCTTTCTGGTACGATC	0	0	0	0	0	0	0	0	0	0	0	0	0	0	0	0	0	0	0	0	0	0	0	0	0	0	0	7.40376	7.41874	7.43384
KchainBiClust_2695_2_ClustSize_116_seq0_06__1	ATCAATATAGCAATGGAAAAGTATTATTTCATCAATAACTATCGAGATGATGTAGCAAACAAATATTCAT	0	0	0	0	0	0	0	0	0	0	0	0	0	0	0	7.31659	7.23247	7.28571	0	0	0	8.72015	8.74184	8.76255	0	0	0	0	0	0
KchainBiClust_1803_0_ClustSize_3_seq0_06__2	TTTTAAGATGTGCGCGAGTTTTTCACAGTGGAGTAGCGCACAATATGCAACTTCGTGTTT	0	0	0	0	0	0	0	0	0	0	0	0	0	0	0	6.22103	6.12088	6.24486	0	0	0	7.37571	7.4036	7.35489	0	0	0	0	0	0
KchainBiClust_2549_3_ClustSize_356_seq0_01__1	TATCTCTTCACATTTGATAATTTCCTGTAACAAGCTCTGTATCCAAAATGTTTTGATA	0	0	0	0	0	0	0	0	0	0	0	0	0	0	0	0	0	0	0	0	0	0	0	0	7.27005	7.23229	7.25733	0	0	0
KchainBiClust_3698_2_ClustSize_567_seq0_09__1	GAGCGTGTAGGGACAAACACCGGTAAAAGGTACTTCTTTTCTCCTTCCTCCCACACATA	0	0	0	0	0	0	0	0	0	0	0	0	0	0	0	0	0	0	0	0	0	0	0	0	7.67037	7.62178	7.6496	0	0	0
KchainBiClust_26296_0_ClustSize_2699_seq0_01__1	AGGGCCCTGGAAATAATTCTTTAATGCTTTCATAACAACATGCACACGCACTTTGCCTATCTGATAGGCATTTTTGTATCGCAAGCAT	0	0	0	0	0	0	0	0	0	6.50728	0	0	0	0	0	0	0	0	0	0	0	0	0	0	0	0	0	0	0	0
KchainBiClust_26792_3_ClustSize_3_seq0_06__1	CTGCTTGCTATTCAACTGGGCTAATCGAATGGAAATGGGAATAGGATGGCTGCTT	0	0	0	0	0	0	0	0	0	0	0	0	0	0	0	5.74163	5.53508	5.48982	0	0	0	6.48714	6.51757	6.49548	0	0	0	0	0.606134	0
KchainBiClust_22807_0_ClustSize_852_seq0_02__1	AACCCCTGTGTGAGATCCTCCACTGCCTGTCTTTGCTTGGCCTTCAAGACGTCAATCTCTGAAGAGATAGAGCTCATCATTTCTGTTTTAAAGTTTTCAAGA	0	0	0	0	0	0	0	0	0	0	0	0	9.2051	9.22393	9.25901	0	0	0	0	0	0	0	0	0	0	0	0	0	0	0
KchainBiClust_27970_0_ClustSize_3_seq0_06__2	GATGTTTGGGATGTAGTCCCAAGACGTGAAGGGAAGTTTGTTATGACTTCCAAATGGAACTATCAGATCAACATGTT	0	0	0	0	0	0	0	0	0	0	0.693147	0.693147	0	0	0	5.65052	5.61637	5.70828	0	0	0	7.15166	7.1788	7.315	0	0	0	0.693147	0.597836	0.641854
KchainBiClust_28080_4_ClustSize_183_seq0_01__1	TGCCACTACTTATTTATTTGGCTTGGCTAGGCGCACGTGCTGACATACATGCCAGGCATAAGATAAGACGATTCGGTAACTAAGCCAATTACACTAAGATAGT	8.46866	8.4698	8.45509	0	0	0	0	0	0	0	0	0	0	0	0	0	0	0	0	0	0	0	0	0	0	0	0	0	0	0
KchainBiClust_28232_0_ClustSize_183_seq0_05__1	AAGTTATGCTTGAACAAAGAAACTGTTGAAGATGTCCCCAATAGTGACGTGGCAGCTAGAGAACGTCCAGCTAAAAAAAGAACCCCCCTCTTCCCAAGATGAACCTTTTGACAATCATTTACA	0	0	0	0	0	0	0	0	0	0	0	0	0	0	0	0	0	0	0	0	0	0	0	0	6.73618	6.74837	6.77206	0	0	0
KchainBiClust_25933_1_ClustSize_675_seq0_01__1	TGTACAAGAGAATCTAACAATTTGTTTGGCTGATTGAGGAATGAATTGCAGGAAACAAAGAGTCATGAATATGGCAGTAAGGTAAGCCCATAGGAAAGACTGATTGCCTGCTGGGCCAAACTGCAAGAATGGTATTTCCTTTTTAGGAAGTAAT	0	0	0	0	0	0	0	0	0	0	0	0	0	0	0	0	0	0	0	0	0	0	0	0	7.46265	7.45954	7.50196	0	0	0
KchainBiClust_28336_4_ClustSize_154_seq0_06__1	TAGGACTTTGGAGTATGGCTGACCTTACTAACCTTATATTGGCCGAAGGTAACTGGGATACTTGATTCCTATAAGGATGACCGGCATTAGCGGTTC	0	0	0	0	0	0	0	0	0	0	0	0	0	0	0	7.47793	7.48825	7.48899	0	0	0	8.65074	8.66478	8.66012	0	0	0	0	0	0.716678
KchainBiClust_8153_2_ClustSize_3_seq0_06__1	TCCCATTGTACTTATTTGAATTTCCCGACATTAGTGTCTCAACGTTCTATTACTTA	0	0	0	0	0	0	0	0	0	0	0	0	0	0	0	6.84111	6.7734	6.8217	0	0	0	7.37791	7.31758	7.37524	0	0	0	0.498992	0	0.693147
KchainBiClust_26635_0_ClustSize_2544_seq0_01__1	TGGGTCTTCGAAGGGCAGAACAGTTTGTTGTTTCACTTCTTCCGTATGCTGATCCGGTTGGGAGAATGGCGACTGATGGTCTCGATTCTCCC	3.13549	3.38922	3.20158	4.17768	4.54784	4.52023	4.72549	4.74866	4.75298	5.45959	7.08459	7.1086	6.08287	6.14081	6.21789	4.66277	4.63612	4.75482	5.13664	4.98165	5.10638	6.10176	6.11558	6.08953	5.57703	5.43247	5.51371	5.07294	4.96882	5.00058
KchainBiClust_30879_0_ClustSize_1697_seq0_01__1	AGAACCAGACTCTTGGATGGGTGGATCATATACCTATATATTGTACCTGCTTATGTTCGATACCTAGCTGATCCAGGCACGGGAACAGATGCCCCCTCGTCACCGCC	3.45902	3.67086	3.17805	4.30213	4.33261	4.54481	4.64095	4.73494	4.72612	5.73311	6.82701	6.84899	6.10447	6.11747	6.11068	4.08718	4.03044	3.94711	5.08494	5.07025	5.1425	6.20225	6.13123	6.21246	5.37097	5.22228	5.40909	4.91476	4.83344	4.85482
KchainBiClust_935_0_ClustSize_1279_seq0_01__1	ACTTGGTGAGGACACTTAGCCCTTGGAGATTCTGTCCATGTGATATATAACTTGG	4.57471	4.45991	4.58129	5.55435	5.4788	5.3762	5.52434	5.59337	5.52736	6.7755	7.34684	7.36353	6.85359	6.79758	6.81862	5.5422	5.42071	5.47429	5.93468	5.94028	5.98202	6.89726	6.91802	6.91386	6.31123	6.32321	6.31181	5.78935	5.80465	5.78
KchainBiClust_14430_1_ClustSize_4906_seq0_01__1	GTTTTAACACTTCTAAACTCCTATAAAGGTTTTAATAATTAATAGGTAGTT	9.42263	9.46557	9.4546	1.51146	0	0	1.76929	1.36949	0	0	1.51146	1.54045	0	0	0	0	0	0	2.02815	1.59601	1.91692	0	0	0	2.2192	2.37335	2.30259	0	0	0
KchainBiClust_16183_0_ClustSize_9204_seq0_01__1	AAAACAAGCTACCATACTGCTGTGCTGCACTGCAACACTAGTACAGTACGGTAGTAGCGCGCGCTGTCTTCGGCTGTGATGCTTCTGGCGAGAGCTTTTCCCAGGG	10.2662	10.4705	9.96833	1.63575	1.63575	1.1421	1.36949	1.89712	0	0	0.929535	1.72277	0	0	0	0	0	0	2.53898	2.54422	2.05412	0	0	0	2.54422	2.61496	2.07107	0	1.76929	0.818312
KchainBiClust_7498_6_ClustSize_11092_seq0_01__1	ATGTTTTGCAATGATGAAGCCAAGGAAACCCGAGAGGGTTCCTTGGTGCTCTTCATTCATTAAATCTT	10.2502	10.0978	10.5119	1.43508	1.76929	1.07614	1.71079	1.79176	0	0	2.34181	2.53898	1.02165	1.22378	1.5724	0	0.693147	0	3.21888	2.99906	3.67714	0	0.693147	0	2.08774	1.46634	2.31583	0	1.76929	0.451986
KchainBiClust_6378_3_ClustSize_4424_seq0_01__1	TCGCTTTCCAATTCCCAGGTTGCCTCCTCAGGACTAAAGTGCTTCCATTGCACCTTTACCTGAGCGATGGCTCGGTTCCGAAGTACTTTTCTTC	11.0567	10.698	11.097	0.818312	2.28238	0.929535	2.19722	1.95539	0	0	3.09104	3.46989	1.4816	1.60944	1.99243	1.38629	1.26851	0	3.66356	3.52636	3.68888	0	0	0	3.06027	2.88294	3.05085	0.635989	1.7346	0.693147
KchainBiClust_29146_0_ClustSize_709_seq0_01__1	GTATTTACTTAAGTTCCAATTCCGTTTTAGACCAAGGTGCTTAAAGAGTCACATGACTGCCCAG	0	0	0	0	0	0	0	0	0	0	0	0	0	0	0	0	0	0	0	0	0	8.75978	8.67707	8.46975	0	0	0	0	0	0
KchainBiClust_14303_0_ClustSize_1174_seq0_01__1	TTGTGCAGAGGGAAATCTAGTACGTGCTAGCTTTCCCCCATGGTGGGATGATGTTGTC	0	0	0	0	0	0	0	0	0	0	0	0	0	0	0	0	0	0	0	0	0	8.32355	8.23352	8.03179	0	0	0	0	0	0
KchainBiClust_18927_5_ClustSize_12_seq0_01__1	CCCAACCTTGTCCCTTCTCAAACCACCCCAGGACATGGAGTGAGGCCAACCCTTTGGTCCACCAGGAAGATA	10.8555	10.9634	11.2876	1.59601	1.43508	0.929535	1.28093	0.693147	0	0	3.74084	3.99636	1.09861	2.0149	0.635989	0.693147	0	0.693147	3.73926	3.56294	3.80666	0.693147	1.09861	0	1.90707	2.57007	2.50689	1.28093	1.81374	1.41908
KchainBiClust_4029_1_ClustSize_2608_seq0_01__1	CGCTATACGCAGACACCGCCTGTAACAAGGACGCCGGTATATCCCTTGGGGGGAATGTATAAACTGTTAGAAGATGAAAACCCTGTGGTGATAAAAGTTGC	9.80918	9.22508	9.82184	1.25276	1.01857	1.66501	0	0	0	0	1.79176	1.38629	0	0	0.693147	0.693147	0	0	2.70805	2.48491	3.3322	0	0	0	0.45953	0.993252	1.02962	0	0	0
KchainBiClust_137_2_ClustSize_7840_seq0_01__1	TCACCTTTCTGGACGTGTCATGAACGGGGTATTTAGTTCCATTCTTCTAGGATTGACTACCCGGTGTCCCTCCCGGTAGGGGGATATCATAG	11.6585	11.6209	11.7286	1.75786	2.64853	2.16715	2.49595	2.25479	1.09861	0	5.25472	5.55991	2.14007	2.66259	2.93916	1.60944	2.19722	1.60944	5.11279	5.47423	5.57494	2.00747	1.32176	1.89085	2.45674	3.13839	3.06339	2.49045	2.19722	1.58241
KchainBiClust_2923_5_ClustSize_3_seq0_01__1	ACCAATGCATCTCTTCCAATTTTGTAGCAGCCATTTGAAGGTGAAACAAATGGACGT	7.0916	7.07701	7.07686	0	0	0	0	0	0	0	1.58412	1.78246	0	0	0	0	0	0	0	0	0	0	0	0	0	0	0	0	0	0
KchainBiClust_1304_2_ClustSize_26716_seq0_01__1	ACACATACACATGTAAATAACCGATACTGTATCAAAAAATATGAGTTTTGAGTCACAAGTCTATCAAGTCTAAAAT	10.988	11.1744	11.1829	1.36828	2.49595	2.16715	2.21193	2.02815	0	0	4.7484	5.01064	1.79176	2.65324	1.93284	1.99243	2.00148	1.38629	4.55458	4.86239	4.57265	1.7492	1.38629	1.28785	2.15176	3.36269	3.16969	2.01045	1.6864	1.96478
KchainBiClust_482_2_ClustSize_24187_seq0_01__1	AACGACACTTCCACCGAAAGAGAAATGCGTGATAGGCATCATCGAAGTAACTTAACCGAAAATCTTGGACCCAACAACCGACGAAGCAAGCCCTCGTTGGGGCCACA	11.5116	11.3975	11.3844	2.5123	2.46243	2.34181	2.19722	2.53898	0	0	4.6217	4.78638	2.10413	2.2192	2.38876	1.15745	1.62924	1.51635	4.53332	4.21262	4.6495	0.693147	0.628609	1.0116	3.25037	3.44681	3.20003	2.06263	2.70359	1.9833
KchainBiClust_2923_1_ClustSize_3_seq0_01__1	AGAAATGGAAAAATGAATCGGTGTACAAACGTGAGTAAGCTTATCTCTTGGTTATTGATGCAATAAAATTATCTTAAGAAAACTTATTCAACTATAATGCATGCACCTT	6.75693	6.71952	6.69232	0.641854	0.693147	0	0.971862	1.27766	1.04455	0.42286	2.25379	1.3375	0	0	0	0	0	0	0	0.542324	0.693147	0.693147	0	0	0	0	0	0	0	0
KchainBiClust_7075_4_ClustSize_3_seq0_01__1	TGGCAGGATTGGAGCATGTGATTTGCTAGATCGGGGCTTGATTAGTGTGTAGCAATTGGAG	10.1007	9.96368	9.86808	1.70475	1.13943	1.41707	2.14739	1.78246	0	0	4.67495	4.79697	1.90211	0.934307	2.25129	1.06784	1.43075	1.43075	3.75816	3.27543	3.16407	0.641854	0	0.955511	3.5888	4.0269	3.88927	1.08181	2.19722	2.28667
KchainBiClust_29372_4_ClustSize_14_seq0_03__1	CTCATTATCTGGGAACTACATCATATAAAGTGCCCCACTACGCTTATGATAATCAAGTGTGTGAAGCCGATTAGTAAACATGACCAAGCTAGAATACTTTCAAAAAGCAAGG	0	0	0	0	0	0	6.94679	7.03566	7.0639	0	0	0	0	0	0	0	0	0	0	0	0	0	0	0	0	0	0	0	0	0
KchainBiClust_29915_0_ClustSize_837_seq0_01__1	GTGGAAGTTTTTGAGAAAGAGAACTTTCAGGGGAGGGTGACTTTCCTAAACTTCAATCTTGTCTTGAGCAAGATCAGCT	0	0	0	0	0	0.693147	6.7315	6.75709	6.72287	0	0	0	0	0	0	0	0	0	0	0	0	0	0	0	0	0	0	0	0	0
KchainBiClust_32117_3_ClustSize_6_seq0_06__1	GCGCAATACCAATGACATCAAACCTGCGCTGCGAAACTGCGCAAAGTACC	0	0	0	0	0	0	0	0	0	0	0	0	0	0	0	8.35464	8.29292	8.36055	0	0	0	7.8911	7.8979	7.89767	0	0	0	0	0	0
KchainBiClust_29968_3_ClustSize_8229_seq0_01__1	CAGATCAATTGACTTGCGGCCACCTCCATTTTCTTTAGTCCACCCTACCTAAATCGATCATCATATCGGTCCGCCCCCGGCTCGGCTTCAGACCGTAC	0	0	0	0	0	0	0	0	0	0	0	0	0	0	0	6.42649	6.33643	6.35591	0	0	0	6.62155	6.60409	6.53846	0	0	0	0	0	0
KchainBiClust_30084_1_ClustSize_24873_seq0_01__1	AGGCCTAAGAGCTCAATATGCGATAAGTGAGTATGAAGGTTTAAGTTTACTAATCAATGGTTTTCGTTTCATTTTGGATGCATGGATTGTATCGGAGGAGG	6.23576	6.35578	6.29642	2.42775	2.64381	1.87692	3.80249	3.69666	2.59805	0	6.74685	7.01116	3.39493	3.80983	4.03483	3.41773	4.01638	3.56825	2.78037	2.8184	2.68273	3.21442	3.29584	2.56495	10.8808	11.181	11.2716	3.24843	3.39073	2.98946
KchainBiClust_30118_1_ClustSize_176_seq0_01__1	AATCCTAGTACTCTTCTTTTCATTACTTCAAAGAGTGAACAATGGAGGGAACATCTTACATAAACCCACGCATGTTTGCTGAATTCAACTTCACTTATTGGAAAGCTAGAATGC	0	0	0	0	0	0	5.36333	5.47282	5.36374	6.4567	7.31644	7.30677	0	0	0	0	0	0	5.9357	5.82356	5.98087	0	0	0	0	0	0	0	0	0
KchainBiClust_3069_2_ClustSize_3_seq0_02__2	GGTGAGTCCCATGAAAGATCTAATATCAGCTACATCTCTCGGTACTGGCCATCCGCATGGCTTTTATTTTCTGTGGGTCGAC	0	0	0	6.8932	6.91691	6.92537	0	0	0	0	0	0	0	0	0	0	0	0	0	0	0	0	0	0	0	0	0	0	0	0
KchainBiClust_3981_0_ClustSize_288_seq0_01__1	AAATCAAGATATAAAGAAGGAAATAATTACGAAGCAGAAATAAATAATACGCTTGAACAAAATCGTTAGCGACAAAGATGAAGAACTAATGCAGTTACGACATAAATTAAAAGTCA	3.48636	3.64414	3.60414	4.31303	4.40976	4.17823	4.54948	4.46207	4.54418	5.31156	6.47106	6.52417	5.85436	5.84764	5.75257	3.95124	3.94803	3.81954	4.96634	4.85981	4.94283	5.82649	5.88703	5.86316	5.63211	5.51511	5.46982	4.82028	4.75789	4.80879
KchainBiClust_30890_0_ClustSize_3_seq0_06__2	ATTTATGACTGTCAAGCCTCTTTTAACCATTATTTAGGTGTAAAACTTTGTGGTTTGGTTAGTATTAAAGTGTAGTCTTGCTTTCCTTGGCTTATTGTACAAAACATTCACTTTTTGCCCTCAAAATT	0	0	0	0	0	0	0	0	0	0	0	0	0	0	0	6.32022	6.34864	6.37206	0	0	0	6.65123	6.63774	6.61909	0	0	0	0	0	0
KchainBiClust_15521_0_ClustSize_1543_seq0_01__1	TGCAAATATATGTTTTCTTTAATTCCCTAGCGTAAGAGGAGCCATTATGGTCAAGTTGCATTCCTAAAAAAA	0	0	0	0	0	0	0	0	0	0	0	0	0	0	0	6.26969	6.35419	6.31545	0	0	0	6.68927	6.6338	6.6295	0	0	0	0	0	0
KchainBiClust_17926_4_ClustSize_175_seq0_06__1	AACTTCCTTTGTTGACAATGGTGGCCAAGACCATACGCCAGATCGGAAGAGCGTCGTGTAGGGAAAGAG	0	0	0	0	0	0	0	0	0	0	0	0	0	0	0	7.60096	7.51861	7.54439	0	0	0	8.51241	8.52868	8.53475	0	0	0	0	0	0
KchainBiClust_14192_3_ClustSize_48_seq0_06__1	TTGATGTGAGATGTCAAATCAAGTGGAATCTCAAACACCCACCACCTAGATCTAGGTCAACTTGCTCAACTAGTGAAGTGCGCCTTGCTTGGGAGAGG	0	0	0	0	0	0	0	0	0	0	0	0	0	0	0	6.07556	6.10617	6.05455	0	0	0	6.81866	6.83789	6.84451	0	0	0	0	0	0
KchainBiClust_7693_3_ClustSize_1636_seq0_01__2	ATTCTAGTTTTTGATGATTGTTTAGGTTAATATATAAGGTTCTTTGTCATATCCCTATAATTCTA	0	0	0	0	0	0	0	0	0	0	0	0	0	0	0	7.35116	7.33759	7.30363	0	0	0	8.28153	8.27155	8.24063	0	0	0	0	0	0
KchainBiClust_27970_11_ClustSize_3_seq0_06__2	GGATGTAGTCCCAAGACGTGAAGGGAAGTTTGTTATGACTTCCAAATGGAACTATCAGATCAAGCACGTTGCAGATGGCAGCATTAAGAAATTAAAAGG	0	0	0	0	0	0	0	0	0	0	0	0	0	0	0	5.82127	5.78812	5.76067	0	0	0	6.52948	6.59414	6.5465	0	0	0	0	0	0
KchainBiClust_173_0_ClustSize_3_seq0_06__1	CCAGCATTAACCGTCAAACTATCAAAATATAACGTTGACGATGTAGCTTTAGGTGTCTGTAAAACAGGTGCCGAAGAAGCTGGAGTAACAGAAGTGAGAACCAGCTTATCAGAAAAAAAGTTTGAATATGGC	0	0	0	0	0	0	0	0	0	0	0	0	0	0	0	6.5958	6.51803	6.5582	0	0	0	7.38839	7.35523	7.41316	0	0	0	0	0	0
KchainBiClust_800_0_ClustSize_3_seq0_06__1	GGCAAAACTAGAGATCTAAAGTTCAAACCAAAGCGGAGTCGCCAAAAACTGTTGGCCCGGTTTTGCAACCAGGCTTAGTGCTATGGCACC	0	0	0	0	0	0	0	0	0	0	0	0	0	0	0	6.55377	6.53045	6.4801	0	0	0	7.39039	7.3792	7.3542	0	0	0	0	0	0
KchainBiClust_4076_4_ClustSize_3_seq0_06__1	AGGTGCCCCTTACTTTCTGTGATATTTTCAAGTTATGGGATCATGGCACACTGGGAACAAATGTATCCGAGTA	0	0	0	0	0	0	0	0	0	0	0	0	0	0	0	6.24407	6.22545	6.20744	0	0	0	7.08255	7.08734	7.04888	0	0	0	0	0	0
KchainBiClust_3231_4_ClustSize_961_seq0_01__2	CCCAAATGTCGACCTCCAGAGAGTTATTTGCCAAGTACTAGCAGAAATACTACTTTACATGGAGATGAACTTCGAGATCAGAATATTGAAGTTGTTGATCAAGTTATT	0	0	0	0	0	0	0	0	0	0	0	0	0	0	0	7.72773	7.67964	7.70629	0	0	0	8.94551	8.94682	8.92085	0	0	0	0	0	0
KchainBiClust_17926_0_ClustSize_175_seq0_06__1	TTGACTCGGAATGGGAAAAAGAGACTCCATGACCCAGTACAGTAACCTGCAATTCGAATGACGGATCCAAGACCAACGCCCGAACCGCGGAGCGGGTAACGTGAAAGGAGCAAAATG	0	0	0	0	0	0	0	0	0	0	0	0	0	0	0	6.85796	6.83365	6.80466	0	0	0	7.9538	7.95257	7.97416	0	0	0	0	0	0
KchainBiClust_29421_5_ClustSize_1216_seq0_01__1	GAGATGACTGCAGAAAATGAGCGGGGTATAGTACCCATCTTCTTGAAAGGAATACTCCTCTGGTAACATGTCAAACAAGTCTGCTTCCTCACAAGCAATATTCTG	0	0	0	0	0	0	0	0	0	0	0	0	0	0	0	5.72359	5.6286	5.59842	0	0	0	6.98958	6.98227	7.001	0	0	0	0	0	0
KchainBiClust_14229_6_ClustSize_3_seq0_06__1	TGAGTCCACATCAGGCATCCCGCACGTAGGTGAATCTGCAGCAAGTGCATGGGAGGAACAGTTTTCAACTGGTGTGATGCAGTGTTTTCCAATCTGAA	0	0	0	0	0	0	0	0	0	0	0	0	0	0	0	5.99821	6.01874	6.04682	0	0	0	7.45056	7.50599	7.47875	0	0	0	0	0	0
KchainBiClust_31337_2_ClustSize_78_seq0_01__3	AAGGGGCAAGGGTTAGTTTTCTGCAATAACATAATTCTCCAATCCCATACACTTCTGCTTGGAATGTCACACTTAACATTCATTTCCTTTTCGGATAATA	0	0	0	0	0	0	6.15406	6.06451	5.98771	0	0.405465	0.656779	0	0	0	0	0	0	6.59834	6.5264	6.57682	0	0	0	0	0	0	0	0	0
KchainBiClust_30769_3_ClustSize_5_seq0_07__2	CAGGTATTGTTGGCTCAATGGTCATCTCTTCTACACAGGACCCGATCTGAGATTGGAGATGTGTAAGGGAAGATGAGATCTTTCACATACTGAAGG	0	0	0	0	0	0	6.19865	6.16647	6.10888	0	0	0	0	0	0	0	0	0	7.397	7.31666	7.45317	0	0	0	0	0	0	0	0	0
KchainBiClust_7366_1_ClustSize_40_seq0_07__1	ATACCGAACAAAAGGAATGGCCAGGCAAGGAGGAAGTGCTCAATCAAGAACAT	0	0	0	0	0	0	6.96171	6.9489	6.94184	0	0	0	0.693147	0	0	0	0	0	8.11499	8.04605	8.12234	0	0	0	0	0	0	0	0	0
KchainBiClust_31549_1_ClustSize_3_seq0_09__1	GGTGGCATTAAAAAATCAAATATATGGTAAACATTGTAACTTGGGTCGGCAACATGCTGATTTTTTATAAAACGCACATGATCCAAGTGTAATAC	0	0.693147	0	0	0	0	0	0	0	0	0	0	0	0	0	0	0	0	0	0	0	0	0	0	7.18686	7.22126	7.16481	0	0	0
KchainBiClust_671_3_ClustSize_101_seq0_09__1	ATTCAGATTGAATTTTCTAAATTATTGCATTAAAATTGGAAATTTAGCAGAAATTACAGGATTTCACCAAATCCCGTAATAGCTCCGTCGTTTGTATACTTGCAGGACACCTGGGCGAAATCCGACACTTGGGTTGCGTTCCCAGATGTACAAGGATGGTGAATAAGCTATCAGATT	0	0.693147	0	0	0	0	0	0	0	0	0	0	0	0	0	0	0	0	0	0	0	0	0	0	6.85494	6.90297	6.91318	0	0	0
KchainBiClust_4022_1_ClustSize_869_seq0_01__1	CTGAAAACCTCAGCGACATCCCCTGGGAAACTGAAAGAAAGTAGGAAAATCCTGAATGATGGGAAAGCAGTCCTACTCATGGTACCTTGGGTCAGGGTTGATTTAG	0	0.693147	0	0	0	0	0	0	0	0	0	0	0	0	0	0	0	0	0	0	0	0	0	0	7.21243	7.14362	7.17605	0	0	0
KchainBiClust_31710_2_ClustSize_172_seq0_09__1	GCAGAGAATCCGGATCATCGTGATGATGACTGAGATCAGTGAGCGACGGGTGAATCACGTGACTTTGGAGAGCTCGGGGTTCTGAACGATTAAGGG	0	0	0	0	0	0	0	0	0	0	0	0	0	0	0	0	0	0	0	0	0	0	0	0	6.90294	6.91324	6.87099	0	0	0
KchainBiClust_31715_0_ClustSize_4962_seq0_01__1	AACTCCTGCTGTAGCTCTTGAATCTGCGCAGTATCAACCTGCGACAGTCTTGCCATGTGTCGATATTTTCTTTATG	0	0	0	0	0	0	0	0	0	0	0	0	11.5485	11.5497	11.5313	0	0	0	0	0	0	0	0	0	0	0	0	0	0	0
KchainBiClust_19062_0_ClustSize_4841_seq0_01__1	AAAGAAAACTTCCCACCTGTTTTCAACTTGACTTTAAGGTGACAAATAATATCGCCGAATATGAAGCATTACTTTTAGG	0	0	0	0	0	0	0	0	0	0	0	0	11.3235	11.3276	11.3089	0	0	0	0	0	0	0	0	0	0	0	0	0	0	0
KchainBiClust_2290_4_ClustSize_3_seq0_02__2	CTATAGAAGCGTTTTTCTCATGCCCAACACTTATGCTTTTGATGATACATGCACCCATCTCTTAACAGCCTGAGAAACCCAATTGCTGATTGCTTGGTG	0	0	0	6.85673	6.83321	6.80151	0	0	0	0	0	0	0	0	0	0	0	0	0	0	0	0	0	0	0	0	0	0	0	0
KchainBiClust_8290_0_ClustSize_2442_seq0_01__1	GCAAGATCTCTCTTGCACTGTGCAATAAGACGCTCATCTCCACCACCACAAG	0	0	0	0	0	0	0	0	0	0	0	0	3.04927	3.41444	3.11352	0	0	0	0	0	0	0	0	0	0	0	0	7.80119	7.75684	7.77418
KchainBiClust_3539_3_ClustSize_753_seq0_01__1	TGTGACGAGAAAGATGTGGAGAATGAAAAGTAGGGCGATATGGCTTCAGTGCGGTGATGAGAATAC	9.12973	8.91744	8.88442	0.693147	0	0	0.693147	0	0	0	0	0	0	0	0	0	0	0	1.38629	0.693147	1.38629	0	0	0	0	0	1.01857	0	0.693147	0
KchainBiClust_31457_0_ClustSize_8527_seq0_01__1	AAGAGAAAAACCCAATGAGTTCCAATATTTTCATCTTCACCATCTGTGGATAACATAATCTTGCTATCAAATGGAATCCAATGCAT	0	0	0	0	0	0	0	0	0	0	0	0	11.295	11.2975	11.2734	0	0	0	0	0	0	0	0	0	0	0	0	0	0	0
KchainBiClust_3895_0_ClustSize_2059_seq0_01__1	CCCGTACCATTATCATTGCTGGAGGGAGGGCTGGATCGGATAGAGAGCTGGG	0	0	0	0	0	0	0	0	0	0	0	0	11.2705	11.2719	11.2593	0	0	0	0	0	0	0	0	0	0	0	0	0	0	0
KchainBiClust_4046_0_ClustSize_306_seq0_01__1	ATGAAACTGATCAAATACATAAACTGGATGACAAGATGTAGATAAATTGGGCTATGGGGTCAAACAGATCAAGGAAGCTATGAAGTGATGATGTAAAGCTGCTGTAGGGCCGATTGATTCAA	0	0	0	0	0	0	0	0	0	0	0	0	0	0	0	0	0	0	0	0	0	0	0	0	0	0	0	6.4996	6.52677	6.41428
KchainBiClust_6519_2_ClustSize_244_seq0_06__1	CTGAACAGGATGTCTATCTCTACAGGTTTTTGGCGACTCCTTGTTAGTTATTGACTGGGCAAA	0	0	0	0	0	0	0	0	0	0	0	0	0	0	0	5.68145	5.71949	5.7017	0	0	0	6.65673	6.62788	6.62672	0	0	0	0	0	0
KchainBiClust_26518_0_ClustSize_5_seq0_06__1	TACACATCACAACACTCATTACGAGGTTTTACCTAGCTCACGGAGGTTCGAGCACAACA	0	0	0	0	0	0	0	0	0	0	0	0	0	0	0	4.73995	4.86313	4.8266	0	0	0	6.52409	6.61731	6.62321	0	0	0	0	0	0
KchainBiClust_227_1_ClustSize_3_seq0_06__1	TTTCAGGTCGAAATTCCAAGTAGAAATGTATAAATCTCATTTTTAATGGAAGAACAATCCATTTCCCACTACCTTGTTGTGAGCCA	1.68434	1.94591	2.35364	2.40893	2.44975	2.25007	6.4023	6.42511	6.40544	6.19664	6.41435	6.3827	1.72686	2.03546	2.02054	7.67084	7.6539	7.67841	6.40012	6.32902	6.33302	7.90158	7.90419	7.9146	0	0	0	3.9643	3.90935	3.86159
KchainBiClust_14490_5_ClustSize_401_seq0_02__3	GAGGCAAAGGTTTTCTCGAGGTAACCTTTTGTTGTGTTGTCTGACACGTTTCGTGGTTTTGTCTCACCGTTCTTCCTTCCATGATGGATATTCAGATACTAGTAAGT	0	0	0	0	0	0	0	0	0	0	0	0	0	0	0	6.81407	6.80972	6.79533	0	0	0	7.28671	7.25616	7.33037	0	0	0	0	0	0
KchainBiClust_4936_0_ClustSize_32_seq0_06__1	CAGGTGGATTCGGAGCAGACACAGAACCGGTCCCCTCAGACTCTAGCAACATGGCACCCCGGGTAACCCGAAGGAAAAGCAGGCAGTGGTGA	0	0	0	0	0	0	0	0	0	0	0	0	0	0	0	6.18842	6.08425	6.10711	0	0	0	6.97572	7.03289	7.00505	0	0	0	0	0	0
KchainBiClust_8135_0_ClustSize_764_seq0_06__1	TAAACTCACTTATGCCACTCATGTCCAAGCTCAACTTGTCCCACTTAACTAGTTACCAAGACAAGGATCACATGATCTA	0	0	0	0	0	0	0	0	0	0	0	0	0	0	0	6.38097	6.30937	6.20678	0	0	0	7.25905	7.25876	7.28947	0	0	0	0	0	0
KchainBiClust_31610_0_ClustSize_1433_seq0_01__1	AAAGGCCGTTGTAAGAGAATGTAAAACTTGCAAGGCTAAGATAGTTAAGAGTGATGGATGCAATAGCGTCAAGTGCAGGAGGTGTAGAAAAACAATGTGTTATGTTTGCGAAAGAAATTTCGGACCGCA	0	0	0	7.54645	7.52769	7.56999	0	0	0	0	0	0	0	0	0	0	0	0	0	0	0	0	0	0	0	0	0	0	0	0
KchainBiClust_26429_0_ClustSize_583_seq0_01__1	ACTCGCTCCTATCTTTGTGTTGTGCTTCGCATTGCGATTTTTGCTTCGTTTTTGATTGGTTTTCTGAGTTCATAGGCTAGG	0	0	0	6.81591	6.78806	6.8153	0	0	0	0	0	0	0	0	0	0	0	0	0	0	0	0	0	0	0	0	0	0	0	0
KchainBiClust_21836_0_ClustSize_176_seq0_02__1	AGGAGGAGTTTAATGAGTCCAAATATAACAAACATTCAGGAAATTTTGTTGATAAAGGTGCCAGAGTATGTGATGATTTCAAAAATCTCAAGTTGTTTGTTTCTGATG	0	0	0	0	0	0	0	0	0	0	0	0	0	0	0	5.37421	5.40129	5.40406	0	0	0	6.68998	6.69846	6.71286	0	0	0	0	0	0
KchainBiClust_9371_2_ClustSize_449_seq0_06__1	CTTCAATTCCTCTGAAAATGAATGTGTACGTGCTTTTGAGAGACATTAGAGGAACAAGGTCCAAATTTTTGATGAAAAT	0	0	0	0	0	0	0	0	0	0	0	0	0	0	0	5.3143	5.30991	5.36701	0	0	0	6.58295	6.58295	6.60725	0	0	0	0	0	0
KchainBiClust_5104_0_ClustSize_6812_seq0_01__1	CGAAGAAAATTAACTTGTTCGCCAACGCGGAGTTAAGCTTCTGCAAGTTTCGT	0	0	0	0	0	0	0	0	0	0	0	0	0	0	0	0	0	0	0	0	0	0	0	0	7.36992	7.28181	7.2954	0	0	0
KchainBiClust_5104_4_ClustSize_6812_seq0_01__1	TGACGCATAGAAAATTTAACTTGTTCGCCAACGCGGACTTAATCTTCTGTCAATAAACTAATTACGCCCTTATTGTAACAGTAAACTATAGCAATCCATTTTATCATACATCATTGTTATGATACTCAT	0	0	1.09861	0	0	0	0	0	0	0	0	0	0	0	0	0	0	0	0	0	0	0	0	0	6.62539	6.60394	6.5582	0	0	0
KchainBiClust_6439_0_ClustSize_3_seq0_09__2	GGCTCAAGAGGATAATTGGTATTAGGTTATTAGCCTACAAGGAAGAATATTATATACTAAGTAAATAGACACC	0	0	1.26369	0	0	0	0	0	0	0	0	0	0	0	0	0	0	0	0	0	0	0	0	0	7.45217	7.3918	7.37843	0	0	0
KchainBiClust_30399_0_ClustSize_1919_seq0_01__1	GTACGCTGTTGTTTGGGATTGTGAAATTCAGTGTTATAATCGCTTACTCTTTACTGTTTACCTGACACAACGTACCCTAATCTCTTATCGCCTCAACAGACCCAGCCGTGCATCATGCATCTCTTCTTTAAAAAA	0	0	1.32176	0	0	0	0	0	0	0	0	0	0	0	0	0	0	0	0	0	0	0	0	0	8.03073	8.03083	8.03604	0	0	0
KchainBiClust_2078_2_ClustSize_455_seq0_01__1	TGGCAGTTATGGCAGTGTTTGACCGCAGTGATGCAGTCAGTGAAAAGTGTGGGCCAGAAGTATCCGGCGCGGACGACCTTTGGGCA	1.89184	1.60944	1.15577	0	0	0	0	0	0	0	0	0	0	0	0	0	0	0	0	0	0	0	0	0	9.21382	9.20863	9.22441	0	0	0
KchainBiClust_21728_0_ClustSize_2140_seq0_01__1	TGAAAAATTCGTTTAAGTCTGTTTCGGAGAGAATTCCCGAATGTCTTCCGAAACTGCGAAGCATC	0	0	0	0	0	0	0	0	0	0	0	0	0	0	0	0	0	0	0	0	0	0	0	0	0	0	0	7.69673	7.68138	7.71274
KchainBiClust_5730_0_ClustSize_3_seq0_06__2	CGGGAGCAGATGAAGTATCCAAAAGGCGACAGAATAAAGAGAGCCACACGCCAGACCCGGGAAGAGGGCA	0	0	0	0	0	0	0	0	0	0	0	0	0	0	0	7.1843	7.11314	7.12788	0	0	0	7.28273	7.28247	7.30436	0	0	0	0	0	0
KchainBiClust_13721_2_ClustSize_3_seq0_06__2	AACAACCATTATAGAAAGTGAAAGCGCTATCCGAGAGGATACATTTCTTATAACAACCTGTCACTTGCAAACATAAGTTTCCATG	0	0	0	0	0	0	0	0	0	0	0	0	0	0	0	8.47492	8.44466	8.45987	0	0	0	8.63194	8.62081	8.61544	0	0	0	0	0	0
KchainBiClust_18790_3_ClustSize_3_seq0_06__2	GGAAAGGTGGCCATGACGGGGACGGAATATACTCCGGGAGGGGGAGCCAAGA	0	0	0	0	0	0	0	0	0	0	0	0	0	0	0	6.83531	6.80294	6.80601	0	0	0	6.92091	6.90868	6.95457	0	0	0	0	0	0
KchainBiClust_5730_2_ClustSize_3_seq0_06__2	GAGAGCCCCGAAAGCATATGTTAAATAAAAGAGCCCACGCCAGACCCGGGAAGACGGCATCAAAACCTTCTAACAAGTTAAAAAATT	0	0	0	0	0	0	0	0	0	0	0	0	0	0	0	6.0579	5.99686	6.04691	0	0	0	6.91108	6.94485	6.94064	0	0	0	0	0	0
KchainBiClust_30422_0_ClustSize_3846_seq0_01__1	ATTCCTCTTTCAAATAGAGTTTAGAAGCATTTGCACAGATTCTGGAGTTGTTGCTTCTGACCATACATTTAAAGGTCTCAAATTGCTTGATTTA	0	0	0	0	0	0	0	0	0	0	0	0	0	0	0	6.45244	6.49224	6.42952	0	0	0	7.65616	7.68	7.62633	0	0	0	0	0	0
KchainBiClust_21676_0_ClustSize_135_seq0_01__1	TGTTCAGAACCCTCTTGCAATGGATATGTCTGTATGTACCGTTAATACGACATTCA	0	0	0	0	0	0	0	0	0	0	0	0	6.6837	6.60604	6.76546	0	0	0	0	0	0	0	0	0	0	0	0	0	0	0
KchainBiClust_8339_2_ClustSize_3_seq0_06__2	CATAACTAATTGTTCCTCGTAAATATCTCAACACATGCTTCGTGCTATCAATGTGTTTTTCTTGGTTGACTCATAAACTGACTAAGCACACTCACTGCATAGCATATATCAGGTTTGATGTTAACAAGATGCATCAATGATGCAGTCATAT	0	0	0	0	0	0	1.79176	1.67964	1.91692	1.06471	1.37055	1.13943	0	0	0.693147	6.09765	6.09813	6.10147	1.75786	1.58924	1.58924	6.86217	6.91299	6.81687	0	0	0	0	0	0
KchainBiClust_8339_1_ClustSize_3_seq0_06__2	TAAACTGACTAAGCACACTCACTGCATAGCATATATCAGGTTTGATGTTAACAAGATGCATCAATGATGCAGTCATATGTCTGTAAATATGTGGATCAATATCACCCAAATCAAAAGAAGTCTCATTCAGTTTTTCATATCATCACCATTGGTGTAGGAAT	0	0	0	0	0	0	0	0	1.04145	2.80823	3.99442	4.12401	3.74913	3.66941	3.57813	7.61761	7.5416	7.59982	0	0.81093	0	7.8292	7.85595	7.83097	0	0	0	1.82455	2.0488	2.32409
KchainBiClust_1204_0_ClustSize_765_seq0_01__1	GTTGACCATGATTCCTTCCTTTGAGTACTTCTGCATAACTCTTTCTATTTTCTTCATTCTTCTTTTCTAGCAACGTAGAGTGCTTCTCTTCAACTTTTTGTTG	0	0	0	0	0	0	0	0	0	0	0	0	0	0	0	6.47976	6.41745	6.455	0	0	0	7.6071	7.60794	7.63213	0	0	0	0	0	0
KchainBiClust_26078_0_ClustSize_134_seq0_06__1	AGACCAGACATAATGCATGCTGTTGGGATGGTCGGAAGATTTCAAGCTGCCCCTAAACAGAATCACTTAGTAGCTGTCAAAAGAATTTTCAAATATTGAAAG	0	0	0	0	0	0	0	0	0	0	0	0	0	0	0	6.2964	6.24043	6.20285	0	0	0	7.36357	7.38437	7.38847	0	0	0	0	0	0
KchainBiClust_28370_3_ClustSize_541_seq0_06__1	CAGAGCCAGAACTTAGCACCATCTCGAGGCAGGCGGATGAAGGTTTAGGCAAGGATCTAACCTAACTACAAGTCCTCAATACCTCTCCCACAAGAGGAGCCACCCA	0	0	0	0	0	0	0	0	0	0	0	0	0	0	0	7.9925	7.93191	7.95134	0	0	0	9.39567	9.4206	9.41366	0	0	0	0	0	0
KchainBiClust_3091_0_ClustSize_5_seq0_06__1	TGCAGGAACATCGTTAGTAGGACCTGATGCCGGAACAGTTACTGGATCTCAGTGGAACAGCACTATAAAGCTTATGTTGGAACTTTTGTTCTAGGAACAAATCATATGAC	0	0	0	0	0	0	0	0	0	0	0	0	0	0	0	7.76622	7.68518	7.70373	0	0	0	9.07678	9.07642	9.05127	0	0	0	0	0	0
KchainBiClust_7388_0_ClustSize_38_seq0_09__1	AAGTCAAAAAGAAAACGCCACAGAAAAGGAAGAGGGCCACCAATGAGTTTGAT	1.72616	1.93393	2.02287	0	0	0	0	0	0	0	0	0	0	0	0	0	0	0	0	0	0	0	0	0	9.25449	9.21928	9.22056	0	0	0
KchainBiClust_21243_0_ClustSize_3787_seq0_01__1	TCAAGACCACGTGTACAAATCTCAAATGGGTATCCAAATATGATTTCATATTTGCAAATGCGGAATGTTGCTTTTCAAAAATCACCTTCATTCCGGGTTAACTAGAATCACCCTA	0	0	0	0	0	0	0	0	0	0	0	0	0	0	0	5.45586	5.31444	5.3822	0	0	0	6.63035	6.66696	6.53959	0	0	0	0	0	0
KchainBiClust_7871_0_ClustSize_10571_seq0_01__1	AGAAGCATGAAGGAGTGCCTTCTACATCTGAGGTATGCAGTGAAGGTTTCTCAT	0	0	0	0	0	0	0	0	0	0	0	0	11.6284	11.6311	11.6104	0	0	0	0	0	0	0	0	0	0	0	0	1.49821	0.424882	0
KchainBiClust_806_0_ClustSize_3782_seq0_01__1	ACGGGGAGTTCACATGAGCACTGGACAGGGACCCGGGCTTACAATGGTGGTTGGACTACTTCAGCATGGTGG	0	0	0	0	0	0	0	0	0	0	0	0	0	0	0	6.82582	6.90908	6.8533	0	0	0	7.79434	7.7818	7.80149	0	0	0	0	0	0
KchainBiClust_86_0_ClustSize_3_seq0_06__1	GGTGCAACGTTTGAGCTGGTCTCACCCTCAAGACGTTCCCGGGAAGTGCCGCACACCACAGTTAGTCGCTTGAGACAAGCCAGAAATTGTGGCTGTGACACATAGCCCATGCGGCACTTCTGGGG	0	0	0	0	0	0	0	0	0	0	0	0	0	0	0	6.72501	6.65957	6.70798	0	0	0	7.61953	7.61033	7.63427	0	0	0	0	0	0
KchainBiClust_26762_0_ClustSize_956_seq0_01__1	TTTTTAAAAACTTCACATCAACGAAAAAAGGTAGAATGGATATGATGACTTTTGGTGCATATTCTAGACGTTTGATGCAACAAAATCAAGTAGAGTGGATAT	0	0	0	0	0	0	0	0	0	0	0	0	0	0	0	5.7301	5.65948	5.54821	0	0	0	6.63522	6.62348	6.59896	0	0	0	0	0	0
KchainBiClust_1992_2_ClustSize_3_seq0_06__1	TTCTTGCTCTCTTCCACCCAATCTTTAGCCTTTGGGGCTCTACTATCACCAAATATAATGTCAGCAAATGTAAGTGCATCATAACCATATAAT	0	0	0	0	0	0	1.46193	1.58204	1.35285	0.81093	0.315081	0	0	0	0	6.19005	6.05985	6.1384	0.462626	0	0.390866	6.62648	6.66265	6.67058	0	0	0	0	0	0
KchainBiClust_24786_2_ClustSize_161_seq0_03__2	ATCCCACCTTTTCGGAGTGATTAGTAAAAGTGCACAAAGAGCAATTGTCCCTGCTAGTCCGCGATGGCCAGGGTTTATCCAATAGTTCTTTTGGAATCAGTAAATGTAATTTATTTA	0	0	0	1.48539	1.04145	1.36524	0	0	0	0.693147	0	0	0	0.693147	0	6.03827	5.94912	5.90195	0	0	0	6.82238	6.82862	6.80637	0	0	0	0	0	0
KchainBiClust_18225_0_ClustSize_18_seq0_05__1	GGAGACGATAGGGAGCGGCGTAACGTAACATACTGACCCACTTCACTCACTCGAAGGTGGATCTGTAACTAAAAA	0	0	0	0	0	0	0	0	0	0	0	0	7.82313	7.81278	7.82509	0	0	0	0	0	0	0	0	0	0	0	0	0	0	0
KchainBiClust_8797_0_ClustSize_1160_seq0_01__1	TATAGGTACCCATACAGGTATTTTAAACATTCCGGAATGGGTCATAGATGTAGCGTCACATTACACATGGGATACCCTCCAGTCCTCGCCC	0	0	0	0	0	0	0	0	0	0	0	0	0	0	0	0	0	0	0	0	0	0	0	0	7.92468	7.9348	7.91881	0	0	0
KchainBiClust_8870_0_ClustSize_7462_seq0_01__1	CGAGCAATGGAGGGCATTTTGAAAAAATGGCCGAAAAGTATGGGCGTGAGAGCGAGAAATGATCTCAAGCATCATCAC	0	0	0	0	0	0	0	0	0	8.90085	0	0	0	0	0	0	0	0	0	0	0	0	0	0	0	0	0	0	0	0
KchainBiClust_25189_3_ClustSize_6_seq0_06__1	TTCCATTTACTTGATACCCGCAGGCTATAGTGATGCAACTCGCGGGTACGCTTACTATAGT	0	0	0	0	0	0	0	0	0	0	0	0	0	0	0	5.61826	5.53393	5.46479	0	0	0	6.50136	6.58089	6.56109	0	0	0	0	0	0
KchainBiClust_917_1_ClustSize_3_seq0_06__1	CCAGCCAGAAAGCAGCGCCCATACAGGTTGAACCCGCGCTACAAAGAAAAAGTCAAAGAAGAAATTGATAAGATGCTTGCAGCAGGTATTATTGA	0	0	0	0	0	0	0	0	0	0	0	0	0	0	0	6.47049	6.48349	6.46225	0	0	0	6.66399	6.64642	6.60773	0	0	0	0	0	0
KchainBiClust_917_3_ClustSize_3_seq0_06__1	CCAAGCAGTAAAACAGCGCCCGTACAGGTTGAACCCGCGATATAAAGAAAAGGTT	0	0	0	0	0	0	0	0	0	0	0	0	0	0	0	6.03369	6.12295	6.00769	0	0	0	6.67719	6.68054	6.61796	0	0	0	0	0	0
KchainBiClust_21416_3_ClustSize_9_seq0_06__1	GAATGCAGAGTAAAATTTATTTTCTTTTACATAAAGTTGGGACACCTGTATCTCCAGAACATGGGCTGCGTACCTCCAGA	0	0	0	0	0	0	0	0	0	0	0	0	0	0	0	7.13536	7.12915	7.08674	0	0	0	7.70626	7.73403	7.71611	0	0	0	0	0	0
KchainBiClust_932_1_ClustSize_3_seq0_06__1	AAAAGATTTTGGGGATCCGGCAGGAACCTAGGTGTAGTAAAGTCCGAAGGTCCTGAGCCGTCTGCAAAGGAATGATGAAATTCTGTGCTAGCGGGAC	0	0	0	0	0	0	0	0	0	0	0	0	0	0	0	7.53244	7.45437	7.50195	0	0	0	8.21856	8.21492	8.20637	0	0	0	0	0	0
KchainBiClust_12710_5_ClustSize_38_seq0_06__1	ATTGATTGAATTGATTAGGTAAGTGAATGCTCCGATCGAGCAGCACCCCACCTCGAAGTAAACAGAGCGCGAAGAAAGGGAAACACCATAATCATCAGAACCAGAACTCGCAT	0	0	0	0	0	0	0	0	0	0	0	0	0	0	0	6.4977	6.46063	6.47151	0	0	0	7.07588	7.05518	7.07516	0	0	0	0	0	0
KchainBiClust_28845_1_ClustSize_1051_seq0_06__1	GGAAAAGCAATAAGAACCTCCACAAGACCACCTCTAATGACCCCTACTCTAGCCACCCCACCAATTCGACTGACAACCCGTAAGCCATTGACCTCCCCAATCCCGGGATCTCTGCCTATTTCAACCATGGGCGCTGCAACACAAGA	0	0	0	0	0	0	0	0	0	0	0	0	0	0	0	6.7546	6.68051	6.73502	0	0	0	7.38563	7.39773	7.41287	0	0	0	0	0	0
KchainBiClust_3652_0_ClustSize_2036_seq0_01__1	TATCATCTAATAGCTCAAAGACATTACAATGACCTACTATACAAAGCTGAAGAAAAAGACAAAGTGCCCTATTGGGCCAGCATCCATAAGAAAAGGAAAGTTCCCAAAGGATATCATCCAAGCATGTA	0	0	0	0	0	0	0	0	0	0	0	0	0	0	0	7.36285	7.35019	7.31394	0	0	0	8.12242	8.09935	8.13608	0	0	0	0	0	0
KchainBiClust_28845_2_ClustSize_1051_seq0_06__1	GACCCCTACTCTGCCACCCACCAATTCGACTGACAACCCGTAAGCCATTGACCTCCCCAATCCCGGGATCTCTGCCTATTTCAACCATGGGCGCTGCAACACAAGAACCAGACGCCCCACAAACTGTAACACCATCCGTCTCA	0	0	0	0	0	0	0	0	0	0	0	0	0	0	0	7.34794	7.22191	7.27884	0	0	0	8.04215	8.12317	8.07863	0	0	0	0	0	0
KchainBiClust_9593_3_ClustSize_220_seq0_03__1	ACGATTGATCAGGGCCACCGCCTGGACCCCAGTCAAGAGCCCTTTCGGTGCACCACCAGTACTCCTGTAGCGTCTCCCCCTTTC	0	0	0	0	0	0	8.12937	8.14753	8.1629	0	0	0	0	0	0	0	0	0	6.90958	6.92215	6.89577	0	0	0	0	0	0	0	0	0
KchainBiClust_17485_3_ClustSize_55_seq0_03__1	GACAACATTGACTAATTTAGAAATTCAAATTAAGCATGAATGTTAACACATACCTTATCCAGGTGGGTCTTCAGTCGGATATATGCATCACGCGTCTTTATAACATAAGTACGCAAACTCTCG	0	0	0	0	0	0	7.76033	7.73497	7.72623	0	0	0	0	0	0	0	0	0	6.58974	6.54502	6.55277	0	0	0	0	0	0	0	0	0
KchainBiClust_223_0_ClustSize_3_seq0_06__3	TGAATACTGACAATACTCGACTAGATCAAAAGACAAAAGGATCTTAGCCGGAATATAAATAAGCAATGCGAC	0	0	0	0	0	0	0	0	0	0	0	0	0	0	0	8.76258	8.75521	8.74964	0	0	0	8.68839	8.69397	8.69803	0	0	0	0	0	0
100034_bclustnum_31_kamer_1_number_1	AATAATTAAAAACAATTTTAAATGCTTTAAAATGTTTTAAACGCTTTAGGATGA	0	0	0	0	0	0	7.68974	7.64559	7.6408	0	0	0	0	0	0	0	0	0	2.48491	3.13549	3.23475	0	0	0	1.09861	0	0	0	0	0
10004_bclustnum_442_kamer_1_number_1	ATGTGAACAATTGGAAGAAGTCATTACCCAATCTTATGATTAAAATAGCCATTCCACATGTAAACAGTTAATTAAATAATATATTTAT	0	0	0	0	0	0	0	0	0	0	0	0	0	0	0	0	0	0	0	0	0	0	0	0	0	0	0	7.62058	7.6029	7.61801
10009_bclustnum_144_kamer_1_number_1	TCTGACCTTCTATCTCTTTAGCTTCCACAAGAACAAATACATCATTGTGGCATCATAGGATTGGCCACATCAGTGAGAAGGGGATGCAGATTCTCCAATCGAGGAAGTTG	0	0	0	0	0	0	3.17208	2.97893	3.09608	1.48808	1.09861	0	6.49103	6.50249	6.51323	0	1.09861	1.09861	4.0228	4.11496	3.62434	1.82455	1.09861	1.35812	0	0	1.09861	1.35812	1.09861	1.29928
10015_bclustnum_112_kamer_1_number_1	NAATTTTGGTTCCTGTTTTTCCAATTTCATCAGGATGAACACTTTCAAGTGTCTTCGTCAGCCACTTTGTGGGAGCATTTTGAGATTT	0	0	0	0	0	0	7.06647	7.1323	7.19949	2.65676	2.52	2.50553	2.76362	3.04452	3.24147	2.19722	3.11352	3.14631	7.73215	7.65243	7.63615	3.7495	3.61092	3.28653	0	0	1.09861	2.56495	1.82455	2.45674
10021_bclustnum_1135_kamer_1_number_1	TTATCTAGTAATTGTAGCAAAGGTAGAGTTATCTTTCCCGGTTTCCCTGCAATACCCCTTAATTCAA	0	1.60944	0	1.09861	2.25878	1.82455	8.55699	8.5225	8.52924	3.13549	3.25037	3.35341	0	0	0	0	0	0	8.01625	8.09028	8.18463	0	0	0	0	0	0	1.88707	2.32239	1.52606
100252_bclustnum_55_kamer_1_number_1	GGAGGGTCGGGCAGCCCCGCACCCCACGTACAGGCAACCTAGGGGATTTCCGACAGCTTTACCGACCCGACGATGAATAATTTTCCCCTACGGCAACC	0	0	0	1.09861	0	1.09861	7.38833	7.3508	7.35166	0	0	0	0	0	0	0	0	0	6.1978	6.09807	5.86961	0	0	0	0	0	0	0	0	0
100271_bclustnum_27_kamer_1_number_1	AGCCTCGCTGACGGAGGAGATGAGATGGCAAAATATGGAGAGCCAGGATGGTGATGCCCTGTCTAGACGAGGACGGTCCCAGAACAGCTACAAAAATAAGTCATGGGGTGGGAGCACTAGATCGAATCT	0	0	0	0	0	0	5.37605	5.61008	5.60519	0	0	0	0	0	0	0	0	0	7.17562	7.07848	7.2498	0	0	0	0	0	0	0	0	0
100277_bclustnum_60_kamer_1_number_1	GTCTTCAAACAAAATTTGATCACTAGGCATTAGGTCTAGGGTTGGTCTTCACTCCTTCCAAAGTTTCCAGACGGAAGAGCGTCGTGTAGG	0	0	0	0	0	0	7.22016	7.22475	7.221	6.19644	6.47895	6.54965	0	0	0	0	0	0	7.73049	7.55355	7.6258	0	0	0	1.09861	1.09861	1.09861	0	0	0
1002_bclustnum_1444_kamer_8_number_2	TATAAATAATATCAAAAAATATTAAGCCGCATGAAGAGACACAAGACACCAAGATTTAACATGGTTCACCCAATCCC	6.83226	6.88566	6.80319	1.94591	1.75786	2.24071	0	0	0	0	1.09861	1.60944	0	0	0	0	0	1.60944	0	0	0	1.09861	1.60944	0	0	1.60944	1.09861	0	1.60944	0
1002_bclustnum_5_kamer_1_number_1	ACTAAAATCACTAAAAAATACCCAATATTTAGGGCAGAACGGGCATTATTCTGTTCTGGGTAAAACTGTGTTGAAAACACAGAAGTTGTCATTTTGTTAATTTAATTCTGACAAAG	0	0	0	0	0	0	0	0	0	0	0	0	0	1.09861	1.32176	0	0	0	0	0	0	0	0	0	0	0	0	6.78887	6.80673	6.85771
100336_bclustnum_145_kamer_1_number_1	CACGGACCGCCACAAGGGCGCGCGCTTCGTCCCTCGACAACCGCAACGGCAAACAGACAGGAGGTACTCCAAGATCGGAAGAGCGTCGTGTAGGGAAAGAGTGTAATCTCG	0	1.09861	0	0	0	0	0	0	0	5.04343	6.73017	6.60181	0	0	0	0	0	0	1.09861	1.46634	2.37158	0	0	0	0	0	0	0	0	0
100354_bclustnum_65_kamer_1_number_1	AGATCGAAGAGCGTCGTGGAGGGAAAATTATAGGGTTCACGCAATGGAGGATCACATTGAGCATGAACAAGAAGTTCTCCAACTCCTAAAGGATAAC	0	0	0	0	0	0	4.06781	3.92621	3.52636	6.1791	6.53705	6.49072	0	0	0	1.84583	1.09861	1.54045	3.86822	3.74107	3.47352	2.3979	2.25878	2.52	0	0	0	0	1.09861	1.52606
100383_bclustnum_321_kamer_1_number_1	CTACATCTGAATTATTCTATGCAAATTCAGCCTGTGCCAAGACTAAGTCCCAAATTCCAGTAACAATCTCAAAAGGTGTCTTCCCTATACTCCTATTCACAGAATTAT	6.26111	6.54175	6.25229	1.09861	1.09861	1.54045	0	0	0	0	0	0	0	0	0	0	0	0	0	0	0	0	0	0	0	0	0	0	0	0
10041_bclustnum_243_kamer_1_number_1	AATTCATCCTAAATTCATAAATTTGTCCGTTGAATTAACTACTGCCAGAGGCAGAATAAATGGGTTTACAAGTTGAAGGAAGAAGATGGAGGAAAAA	2.96527	2.94444	1.94591	0	1.60944	1.09861	6.65852	6.69382	6.74923	5.78874	5.93331	5.29079	4.17439	4.20469	3.88362	6.16752	6.09627	6.29932	7.27725	7.09986	7.1025	6.91751	6.94832	6.83152	0	0	0	4.3895	4.09767	4.36945
100431_bclustnum_1_kamer_5_number_2	GCTCGGCAGACTGCCGACAGCCCACGGGTTGAGGACGCAGACCCCTAGGCCCAGCCCTCAGAGCCAATCCTTT	4.25053	3.97567	4.16556	4.60374	4.64301	4.44935	5.60528	5.8369	5.74163	6.2425	7.24229	7.29273	6.67294	6.75077	6.73017	6.36622	5.81157	5.82008	6.40712	6.12531	6.19703	6.98114	6.9369	7.02757	3.63382	3.66356	3.67811	5.94654	5.91928	5.91774
100465_bclustnum_120_kamer_1_number_1	AGTGTGGCTGAATTCTGAGTCACTCTCATAGAGAAGCGGCCATCATAATCTC	0	0	0	0	0	0	6.69332	6.60123	6.60123	5.72592	6.40468	6.82165	3.43399	3.157	3.51155	2.3979	3.21888	3.29584	6.9797	7.01751	6.68436	3.31419	3.48124	3.52636	0	0	0	0	1.09861	0
100491_bclustnum_71_kamer_1_number_1	AAACCAGAAATAACCTTACCAGGGCAGGCACTCAAGTCCCCGAGGCTAAGGGTGAGATCTCCGACCGGAGACACTCGGTTGCACTAAACAGTGCTGCAG	0	0	0	0	0	0	4.46079	4.44787	4.43478	6.76144	7.39025	7.38558	0	0	0	0	0	0	5.25227	5.13252	4.98285	0	0	0	0	0	0	0	0	0
10053_bclustnum_46_kamer_1_number_1	ATCATCACTTTAGCCTTTCCTTAACTCCATCGTCATCATCGTTATCACCCACTTCCTCATCAT	0	0	0	0	0	1.09861	0	0	0	0	0	0	7.11915	7.26613	7.27136	0	0	0	0	0	0	0	0	0	0	0	0	0	0	0
10057_bclustnum_8298_kamer_1_number_1	TAAATTGTTTCTACCATCAATGTTTTTTTAACCTCGCACTTTAGGGGGCAATCTGCTACACACAAAATTGTCACATCTAAGTGTCGCACCTTAATTATGCATCCCCGACACTTTGAAAAAAAATTCAGTTCAC	0	0	0	1.09861	0	0	6.7655	6.76041	6.70515	3.99514	4.33511	4.32281	1.60944	1.34993	1.09861	1.09861	1.84583	1.94591	6.44857	6.41444	6.04737	1.91365	1.09861	1.52606	0	0	0	2.92674	3.29584	3.26358
10058_bclustnum_160_kamer_4_number_2	TCAGAAGCAAGGATCACACAGCGTCATACTTTACGTCTAACAACGAGGTCAGAAGTTGACTC	0	0	0	0	0	0	0	0	0	0	0	0	0	0	0	7.41256	7.27448	7.29687	0	0	0	6.79906	6.71619	6.82365	0	0	0	0	0	0
10059_bclustnum_48_kamer_1_number_1	TGATAAAGGAGTTCACCCCTCTTATGGGCTACATCTCCTGGTCCAGCTTCCAATGGATATTATT	0	0	0	0	0	0	2.53898	2.61496	2.75154	2.5123	2.05412	1.7346	0	0	0	6.2519	7.59186	7.39183	3.09104	2.8094	3.35341	6.21527	6.35437	6.22324	0	0	0	2.73003	2.73003	3.24519
100630_bclustnum_134_kamer_1_number_1	TAACGAGCCTATCGATAGGGAAACTCGTTCTTGTCTAAAGACAAGTTTGTCGCTATTAATCATTTTAACGAGTCTAACGACAAGAAAA	0	1.09861	1.09861	0	0	1.55814	7.94582	7.86749	7.91142	0	0	0	0	0	0	0	0	0	2.25129	1.55814	2.3979	0	0	0	1.09861	0	1.09861	0	0	0
100763_bclustnum_90_kamer_5_number_4	CAAATAGGTTAAACACATACCCACTTGTAGATCTTCTTTGATCCAGATCTCCAGCCCAGTCTGCATCAACAAAGCCATGAATATCCAACACTTANCNN	1.09861	0	0	1.42139	1.09861	1.51635	8.60579	8.62732	8.5975	7.58652	8.17842	8.19193	4.38064	4.26892	4.44526	7.22847	7.05244	7.0176	9.70996	9.53648	9.47492	7.45569	7.4935	7.46515	1.09861	0	1.32176	4.41616	3.87812	4.38895
100766_bclustnum_110_kamer_1_number_1	ATTACATTAATTAAATAATATTATTCAATTAATAAGCAATACCTTTCTTATTTTAATTGAATAATT	7.79317	7.82151	7.80846	0	0	0	0	0	0	0	0	0	0	1.09861	1.09861	0	0	0	0	0	0	1.09861	0	0	0	1.09861	0	0	0	0
100775_bclustnum_102_kamer_1_number_1	GATATGAAGAGATAACATGGCACTTATTTCTCATGTTAGAAAAAATGATACATGGATTATAGATAGTAGATGTTTACACCATATGACTGGGGATAAATCAAAGTTTGAACATATTGAATATTATGACGAAGGAAGTGTAA	6.53747	6.48228	6.51949	0	0	0	0	0	0	0	0	0	0	0	0	0	0	0	0	0	0	0	0	0	1.09861	1.60944	1.09861	0	0	0
1007_bclustnum_690_kamer_1_number_1	ATGTCCTAAGTCTGACATTTCAAAAGTTTGTTTAAGACTGGATTTCACATGGGTTATGACTTAGGTCACTACTAGTAAGAATAAGGTCATCAACATATAGAACAAGTATGATGAGATGGTTTCCTACTTTC	0	0	1.09861	0	0	1.09861	0	0	0	0	0	0	6.52796	6.64118	6.55891	0	1.09861	1.09861	1.8068	0	1.49393	0	1.09861	1.86075	0	0	0	1.09861	0	0
100872_bclustnum_38_kamer_1_number_1	GATCAGATTGTCGAGGGAGACACATGGAAGACAACTTTCAAAACTAAGCAAGGTTTGTTTGAATGGATGGTAA	2.15948	1.75786	2.32239	1.09861	0	0	3.40595	3.59535	3.90916	3.2852	2.45674	2.52	1.09861	1.09861	1.38629	6.67798	6.75444	6.71815	3.60317	3.3373	3.26358	6.60065	6.62065	6.63763	0	0	0	4.30599	4.13859	4.57471
100907_bclustnum_62_kamer_4_number_2	AAGCCTTAAAATCCTTGATTTTCCAGCACTTCTTACTTGTTTTTGAGAAAGAATACC	0	0	0	0	0	0	0	0	0	0	0	0	6.63042	6.76458	6.74735	0	0	0	0	0	0	0	0	0	0	0	0	0	0	0
10090_bclustnum_602_kamer_1_number_1	GATCGGACAAGTTCCTCCACTTTAACCGTCTCAATTGAAGTGAACCCCCCGGAAAATCCAAGTGATTCTAGCCGACGTCTGCTCCAGTTACAGTGGGATCTTCCCACCATTGTCACCTTAGGAAGAATCCTAAAGAATATGGCCTCTAAGGTTACCAACTGAGACAA	0	0	0	0	0	0	6.88077	6.85817	6.838	4.33892	4.55519	4.54196	1.09861	0	0	0	0	0	6.7748	6.74067	6.72863	0	0	0	0	0	0	0	0	0
100966_bclustnum_415_kamer_1_number_1	ATTCTAGAAAAGGGAAATTTGATGTAAAAGATGATGAAGGAATATTTTTAGGATATCTAGCAAAGTAAAGCATATAGATGTTTAACTCTATCTACTCACAAAGTCATAGAAAGTACACATGTGAAAGTTGATGAGTTTGCAGAAAAATCT	6.65874	6.72332	6.64006	1.09861	0	1.09861	1.09861	1.42139	0	0	0	1.67398	0	0	0	1.09861	0	0	1.09861	0	1.09861	0	0	0	0	0	0	0	0	0
1009_bclustnum_1988_kamer_1_number_1	ACAAAGACAAAGAAACTTGCCATTGAGGCATGCACGCTCTTGGGTACTGAGGTGGTTTCTAGATTAGATTCCGGATATGATTTGAAGTCGACAAGAACAAATCCGTCGAAGGAGG	0	0	0	0	0	0	4.36945	4.35157	4.35157	2.00148	2.62467	1.8718	0	1.09861	1.6864	1.60944	0	1.09861	5.97551	5.74329	5.77201	2.63906	1.6864	1.09861	0	0	0	7.104	7.08041	7.10995
100_bclustnum_2436_kamer_1_number_1	AATCTTGAACACTCATCCTTAATACCTTTCTTTTTGGGGTAATTATACTCATCGCGAATATCCTTGAGAGGGCGTTCAGCAGCCAGCTTGCGGCAAAACTGCGTAACCGTCTTCTCGTTCTCTAAAAACCATTTTTCGTCCCCTTCGGGGCGGTGTCTATA	0	0	0	0	0	0	0	0	0	0	0	0	0	0	0	0	0	0	0	0	0	7.80642	7.81195	7.51181	0	0	0	0	0	0
100_bclustnum_2_kamer_1_number_1	TTAAGAGGGCGTTCAGCAGCCAGCTTGCGGCAAAACTGCGTAACCGTCTTCTCGTTCTCTAAAAACCATTTTTCGTCCCCTTCGGGGCGGTGGTCTATAGTGTATTAA	0	0	0	0	0	0	0	0	0	0	0	0	0	0	0	0	0	0	0	0	0	6.54564	6.38553	6.01664	0	0	0	0	0	0
100_bclustnum_6531_kamer_1_number_1	CTTAAGGGGCGTTCAGCAGCCAGCTTGCGGCAAAACTGCGTAACCGTCTTCTCGTTCTCTAAAAACCATTTTTCGTCCCCTTCGGGGCGGTGGACTATAGTGTTATTAATATCAAG	0	0	0	0	0	0	0	0	0	0	0	0	0	0	0	0	0	0	0	0	0	6.84443	6.68858	6.50769	0	0	0	0	0	0
101111_bclustnum_23_kamer_1_number_1	CATAGCGATGACTTGAGAAAACTTTGGCATGAGCGGTTTGGGCATCTAAACTATCCTCATT	1.09861	0	0	0	0	1.22378	5.14633	5.01993	5.1156	3.38099	3.21888	2.8622	3.44468	3.34404	3.20545	6.79831	6.67245	6.55203	3.80666	3.67377	3.83298	6.64898	6.73578	6.77727	0	0	0	1.09861	1.09861	1.52606
10116_bclustnum_1149_kamer_3_number_2	GAGCCGCCACGAGCCGCACGAAGTGCCGCAACGAAACGCCCGAACGGCAGTACGAAAAGACAACGGAAGAG	0	0	0	0	0	0	0	0	0	0	0	0	0	0	0	7.05334	7.04366	6.79427	0	0	0	4.14841	3.70541	3.76892	0	0	0	0	0	0
101181_bclustnum_69_kamer_1_number_1	AAGAATTAGTTGGATGTAAATGGATATATAAAACAAAGTTTACTTCAGATGGCCAGATTGAAAAAC	0	0	0	0	0	0	0	0	0	0	0	0	1.09861	1.38629	1.09861	0	0	1.09861	0	0	0	0	0	0	0	0	1.09861	6.41999	6.50628	6.40136
1011_bclustnum_1233_kamer_2_number_2	TTCAAGTAGAAGTCTTAAATTAAGGAGATAAGTCTTTCTGAAGTCATGCAAGAGTTATCCCTTAAAT	0	0	0	0	0	0	7.64745	7.69758	7.85645	0	0	0	0	0	0	0	0	0	7.45221	7.74009	7.90544	0	0	0	0	0	0	0	0	0
101201_bclustnum_214_kamer_5_number_3	ATACTACATGCATTGAAAAAATGGCGTCCTTACCTAATAGGTAGGCACTTCAAGGTCAAANNN	0	0	0	0	0	0	0	0	0	0	0	0	4.07754	4.18965	3.90533	6.03388	5.90989	5.81413	1.09861	1.09861	1.60944	6.86485	6.84942	6.84126	0	0	0	3.13549	1.84583	2.83321
101235_bclustnum_31_kamer_1_number_1	TTCAAATCTTTACTAAAATCCCTTTGGATGAAGTTGTTCAATAGTAAAGAAGTCGCAGACCC	0	0	0	1.09861	0	0	6.75936	6.79194	6.67628	1.60944	2.96527	2.65324	0	0	0	0	0	0	6.61898	6.59342	6.62044	0	0	0	0	0	0	0	0	0
101237_bclustnum_12_kamer_1_number_1	ATTATTTGTGAATTAATTCACTCACTCTCCTAGTGTATCATTCAGTTAGACTAGATACAAGTAGCTCAACTGAGTCTAACTGAG	0	0	0	0	0	0	0	0	0	5.95064	6.93464	6.8742	0	0	0	0	0	0	0	0	0	0	0	0	0	0	0	0	0	0
10124_bclustnum_5988_kamer_2_number_2	GTTAGACTTAGAAATTCCAACATGGTATCGGAGCTGCGTTTGAGGGCGGGTGTTGGAAAAATCTCCGTAATTTCCACCCTGGACTCCTGTTATTCGG	0	0	0	0	1.09861	0	6.29803	6.24708	6.26245	3.78419	3.7612	3.81771	0	0	0	0	0	0	6.76331	6.21888	6.83141	0	0	0	0	0	0	0	0	0
10128_bclustnum_216_kamer_1_number_1	GTTCATTAGGCGCGACAGTCTGGAAATCCAAAGTTGCGATAAACGGTAATTGCCGATTAGGATCCCTAAAACTCTGGGTCACAAGACCAGTTCCAGGAGGATGATATCTTGGATAACTTGGAATAGGTATCGCATTCGTGAGATCG	0	0	0	0	0	0	6.92236	6.90274	6.92825	1.79176	3.29584	3.01226	0	0	0	0	0	0	6.37161	6.1832	6.16662	0	0	0	0	0	0	0	0	0
101295_bclustnum_26_kamer_1_number_1	CCTGTCAACTGTACCAGAATCAAGTCTGAGACTTCGACCCTGGCCTGCAC	0	0	0	0	0	0	1.09861	0	0	7.04287	7.34364	7.36771	0	0	0	1.09861	1.09861	0	0	0	0	2.12823	1.6864	1.5506	0	0	0	0	0	0
101313_bclustnum_19_kamer_1_number_1	TGTTATGAAACCAGCTCCAAAAATAGAAGAAAAGAGAGATCAACGCCTTAGGAATAAGCCACTCGAGGGG	0	0	0	0	0	0	5.60106	5.62402	5.67431	6.48942	7.35327	7.37838	0	0	0	0	0	0	5.4387	5.35995	5.4848	0	0	0	0	0	0	0	0	0
10131_bclustnum_128_kamer_1_number_1	CATCATCTTCATCACCATCATCATCCTCATTACCATTATCATTATCTTTCTCTTACCCAATCTAACACTTCAAAACATAAATTGTGAAATTATAACGTGCGTTATGTA	4.50645	4.43793	4.51961	1.09861	0	0	0	1.09861	0	0	1.09861	1.09861	6.7132	6.756	6.6639	1.43508	0	1.09861	0	0	0	0	1.09861	0	0	1.09861	1.09861	2.44235	2.00148	2.8094
10134_bclustnum_599_kamer_1_number_1	TAGAGGAGAGTAATGCCAAATAGCTTGAGGCTTCTGCACATATCTGGAGGAGTC	0	0	0	1.09861	0	0	7.79869	8.03706	7.827	0	0	0	0	0	0	0	0	0	8.42519	8.39942	8.2197	0	0	0	0	0	0	0	0	0
101392_bclustnum_205_kamer_1_number_1	ACAATGCAATCATTATGATATAACAAAAATAGCCTATAAATATGTTGCATATACTTGTG	6.68764	7.01302	6.98638	0	0	0	0	1.09861	0	0	0	0	0	0	0	1.7346	0	1.38629	0	0	0	1.09861	0	1.09861	1.09861	1.09861	1.09861	0	0	0
101422_bclustnum_70_kamer_1_number_1	CAATATCGTAGACACTGAAAATTGTCCCAAATGATTATATTAATCTAATTAA	7.11623	7.19908	7.16379	1.60944	1.83258	1.94591	0	0	0	0	0	0	0	0	0	0	0	0	0	0	0	0	0	0	0	0	0	0	0	0
101430_bclustnum_668_kamer_1_number_1	TTCTGATGTATCATTAGGACAGCCATACTTGTGGAAGCGTCATGCTATGTATGAGTCTCGGCCTCGCGCTAGATCGGAAGAGCGTCGTGTAGGGAAAGATGTAGA	1.09861	0	0	0	0	0	3.86598	4.17439	4.0279	6.39359	7.20457	7.05488	2.07944	1.90424	2.16496	2.10413	2.34455	1.60944	5.96651	5.80557	5.73334	1.42139	2.00148	1.09861	0	0	0	0	1.09861	0
10145_bclustnum_65_kamer_1_number_1	TTGGACCCGCCTGGAAACACCAAATTTAGGGCACGCATGGAAACCCTAAATTTTGGGCGTCGAGTGGAAATACCTAATTTTG	0	0	0	0	0	0	4.24492	3.8122	3.82864	0	0	0	0	0	0	0	0	0	6.94529	6.64963	6.7178	0	0	0	0	0	0	0	0	0
10148_bclustnum_179_kamer_1_number_1	ACGTGAAATCATTGAATCTCTTGATGGTGTGATATTTCAACAAAAGTATATCACGGTCTAGTTTGTAAGGGATGATAATAGAGGATATATGTGTTACCTCTAGACATTGCTTAAGTGCAAGTAGAGGA	6.75422	6.77841	6.82183	0	0	0	0	0	0	0	0	1.09861	0	0	0	0	0	0	0	0	0	0	0	0	0	0	0	0	0	0
101522_bclustnum_114_kamer_1_number_1	CTCTCAGCAAGGATAACCTTATTATGGATGGCATTTGAGTATTAGCTATGTGTAATCCAGGGAATGAAAGATAGTCTACGAGCTAGACCACATGGCCTTTAGGCAAAAAACACATTACTCTAAAGAGAGAGGAGACAATGGTTCCC	0	0	0	0	0	0	6.98487	7.05244	6.95633	0	0	0	0	0	0	0	0	0	6.65504	6.51881	6.64048	0	0	0	1.09861	0	1.31568	0	0	0
101530_bclustnum_201_kamer_1_number_1	AATTTGGTTAGTATTTTTTGATGATATACTAATCTATAGCAAGTCTTGGGAGGATCA	1.52606	1.09861	1.09861	1.46634	1.54045	0	6.48971	6.46977	6.62495	5.12198	5.743	5.77144	1.82455	2.28238	2.35138	6.76311	6.76849	6.81124	5.41313	5.66988	5.63954	7.30002	7.30182	7.33672	0	0	0	0	1.09861	1.09861
101646_bclustnum_43_kamer_1_number_1	GTGCGCTTGGACAATATAGCGCACTGGTGCGCTAGGTTACACTAGGCACACGATAGTCG	0	0	0	1.09861	0	0	5.30614	5.35186	5.39168	5.85679	6.55332	6.34124	1.38629	1.67398	2.05412	1.94591	2.19722	1.52606	6.53814	6.45362	6.32257	1.50408	2.66259	2.56495	0	0	0	0	0	1.09861
101660_bclustnum_53_kamer_1_number_1	TATCCTACCCACTTATGTGTGTGGATATTTATATATTAGGAGATATTATCTAGTTATCAGGTATAGTTCTTTCCTTGATCTATGGTATTGATTAGATCCTTGA	0	0	0	6.82176	6.87791	6.89061	0	0	0	0	0	0	0	0	0	0	0	0	0	0	0	0	0	0	0	0	0	0	0	0
10168_bclustnum_36_kamer_1_number_1	TCAGCCGTAAAAGGGGTAAACGTATACTGGTTAGATGTCGTTTCGAAGCCAATTTAAAGATCGGAAGAGCGTCGTGTAGGGAAAGAGTGTAGATCTCGGTGG	1.09861	1.09861	0	0	0	0	1.89712	2.85647	3.00568	6.08404	6.63551	6.4608	0	0	1.09861	0	0	0	1.46634	2.19722	1.88707	0	0	0	1.94591	0	0	0	0	0
10171_bclustnum_1215_kamer_1_number_1	GGGACTGGATTTCCACCAAGGGGAATTCCTTGGTTAGTAGACTCCATTTTCTCAACCCAAGATCAACGTAGGAAAGGGGGAATGAATATTCCGTTTAAAATAATTTTTTATACGCTT	0	0	0	0	0	0	7.0755	6.99134	7.06048	0	0	0	0	0	0	0	0	0	5.39816	5.43372	5.53626	0	0	0	0	0	0	0	0	0
101733_bclustnum_10_kamer_1_number_1	ACTGATGTGTAGGGTTGCAGGTGTGGTGTTATTAGCAGGTCCAGTCGCTTGATGAAATCCGGTGAGGTCAGGTTCTTTGGATTGTTGGTTGACGCGGAGATCTCGTCCTTGGCGAAGCCAGCTGATGG	0	0	0	0	0	0	2.35138	2.19722	1.75786	5.86647	6.54506	6.67935	1.09861	0	1.09861	1.72277	1.52606	1.8718	1.82455	2.59525	2.19722	2.19722	2.34181	2.5337	0	0	0	1.09861	1.09861	0
10174_bclustnum_426_kamer_6_number_3	GTTGAAATGCAAGAACATCGTCTGATTACCAGCCAATGATGAAAGCTGTTAAAAAACGCG	0	0	0	0	0	1.09861	6.68752	6.68669	6.6563	8.1199	8.9782	9.00675	1.43508	1.75786	0	0	0	1.60944	8.37694	8.16061	8.10531	0	0	1.09861	0	0	0	0	0	0
101778_bclustnum_323_kamer_1_number_1	ACTTCCTAAGGATAAAGGTTTTATGCCTATAGGGGACTCCCAATATATACGCGACGGTACGTGGAAGCACAATCCGTACTGGCGCTATTGTCCCTCAGGAGGAATCACCCACCATCCACGAGATCGACAGTCACCAGCTTAAG	0	0	0	1.09861	0	0	7.39127	7.42541	7.42806	1.46634	1.09861	0	0	0	0	0	0	0	6.02046	6.1474	5.91786	0	0	0	0	0	0	0	0	0
10182_bclustnum_90_kamer_1_number_1	AGATCATCAAAGCCTCAAATACTTTCTGGAACAACGCATTTCCTCACAGGAGCAACAAAAATGGGTCACTAAGCTCTTTGCTATGTTATGAGATAAT	1.60944	1.60944	0	0	0	0	1.34993	1.09861	2.34455	0	0	0	0	0	0	7.49819	7.17072	7.20332	0	1.09861	1.09861	7.60373	7.57107	7.5674	0	0	0	0	0	0
101852_bclustnum_34_kamer_1_number_1	AATTTAATATATCTAAATCTAACTACTGAAGCAAATGTGCAAGACTGAAATAAACAAAGCAGTACTGCAATTAAACAGAAACTAAGAAAAGTAATTAGAGCAGAACAATATT	0	0	0	0	0	0	0	0	0	5.66769	6.80693	6.86456	0	0	0	0	0	0	0	1.09861	0	0	0	0	0	0	0	0	0	0
101854_bclustnum_126_kamer_1_number_1	GATCGGAAGAGCGTCGTGTAGGGAAAGAGTGTAGATCTCGGGGGGGCCGTACATTAAAAAAA	0	0	0	0	0	0	0	1.09861	0	5.66712	7.02121	7.03741	0	0	0	0	1.09861	0	1.09861	0	0	0	0	0	0	0	0	0	0	0
101891_bclustnum_314_kamer_1_number_1	TTCCTCTGAGACTGAGCTTTCTCGCCAAATGACGACTTCTACCACATCTATTGACATTATGCGTCTGCAAGCTGCTTATGCTAATTTGCATACTGACCAAGAACGTGATTACTTCATG	0	0	0	0	0	0	0	0	0	0	0	0	0	0	0	0	0	0	0	0	0	7.41561	7.32951	7.0859	0	0	0	0	0	0
10189_bclustnum_717_kamer_1_number_1	AATATGAGAAGTATCATGAAAGATCATAAAAAATGATGAAAATTTACAAAAGAATGCAAAATATCACAAAATA	0	0	0	1.09861	0	0	0	0	1.09861	2.19722	3.31054	2.76362	1.09861	1.09861	0	0	0	0	6.48718	6.53766	6.62179	0	0	0	0	1.09861	0	0	0	0
1018_bclustnum_85_kamer_1_number_1	ATCACACAAATAGTTAAGTAAAATGCAGATAGAACATATAATGGATCTATAGAAGACAAACCAGAAACAGAAAAATGTGGTGGTGCGTTACGACGGTCAACAGGATG	0	0	0	0	0	0	5.23538	5.3909	5.49224	6.00191	6.83733	6.77674	0	0	0	0	0	0	5.59099	5.72815	5.59694	0	0	0	0	0	0	0	0	0
101943_bclustnum_94_kamer_1_number_1	ACTACCTTGTGCTAAAACCATGTGCTACCTAACCCATTGACCCCACATTTAATATTGAAAATTTAATTCTTTTCCCCAATAATAAATAATTA	7.36735	7.3824	7.38295	0	0	0	0	0	0	0	0	0	0	0	0	0	0	0	0	0	0	0	0	0	0	0	0	0	0	0
101982_bclustnum_385_kamer_9_number_2	TATATTCTTACAAAACAAATGTCCGAGTAAACAGCACTCAAACACCTCATGAGCTTTGGAGTGGTAAAACTCCTTCCG	0	0	1.09861	1.09861	1.09861	0	6.74318	6.6774	6.69022	0	0	0	0	0	0	0	0	0	5.115	5.1299	5.08296	0	0	0	0	0	0	0	0	0
101_bclustnum_0_kamer_1_number_1	ACATCATAGCCAGATGCCCAGAGATTAGAGCGCATGACAAGTAAAGGACGGTTGTCAGCGTCATAAGAGGTTTTACCTCCAAATGAAGAAATAACATCATGGTAACGCTCATGAA	0	0	0	0	0	0	0	0	0	0	0	0	0	0	0	0	0	0	0	0	0	7.91754	7.86057	7.6212	0	0	0	0	0	0
101_bclustnum_1_kamer_1_number_1	AAACTGGCCTAACGACGTTTGGTCAGTTCCATCAACATCATAGCCAGATGCCCAGAGATTAGAGCGCATGACAAGTAAAGGACGGTTGTCAGCGTCATAAGAGGTTTACC	0	0	0	0	0	0	0	0	0	0	0	0	0	0	0	0	0	0	0	0	0	7.44694	7.38697	7.15383	0	0	0	0	0	0
101_bclustnum_2_kamer_1_number_1	AGAGCGCATGACAAGTAAAGGACGGTTGTCAGCGTCATAAGAGGTTTTACCTCCAAATGAAGAAATAACATCATGGTAACGCTGCATGAAGTAATCACGTTCTGGTCA	0	0	0	0	0	0	0	0	0	0	0	0	0	0	0	0	0	0	0	0	0	6.69084	6.70441	6.5335	0	0	0	0	0	0
101_bclustnum_7871_kamer_1_number_1	ACAGAAACTGGCCTAACGACGTTTGGTCAGTTCCATCAACATCAAAGCCAGATGCCCAGAGATTAGAGCGCATGACAAGTAAAGGACGGTTGTCAGCGTCATAAGAGGTTTTACCTCCAAATGAAGA	0	0	0	0	0	0	0	0	0	0	0	0	0	0	0	0	0	0	0	0	0	6.9924	7.02034	6.71174	0	0	0	0	0	0
102014_bclustnum_51_kamer_1_number_1	TTTTGCATTCGTGTTACTGAGATTGTTTTTTAGAGTGTATGCCATTAGAAATCCAGTGTTTGATCATTAGGTTAGATTCAGAACTTATTGTATTACATTTAAATAGAGTATATGCAATTAGAA	0	0	1.09861	0	1.09861	0	6.36303	7.21671	6.17205	3.99636	4.46846	4.60916	0	0	0	0	0	0	3.91202	3.71357	3.31782	0	0	0	1.09861	0	0	0	0	0
102027_bclustnum_325_kamer_1_number_1	AAGGGTCACATATAATCAGAGCCGACATAACAATATGGAGACTATATGGGCACAACAATA	0	0	0	1.09861	0	1.09861	7.79359	7.77975	7.81669	3.72167	3.87812	3.96398	0	0	0	0	0	0	7.24803	7.34838	7.33215	0	0	0	0	0	0	0	1.09861	0
102039_bclustnum_11_kamer_1_number_1	AGTGTGGGTATGGAAACAATTTAATTCCTTGGCTACCTTATAGTGAATAAAATTATGGGTACAGATCGGAAGAGCGTCGTGTAGGGAAAGAGGGTAGC	0	1.60944	0	0	0	0	3.51651	3.04452	3.35341	7.38516	7.38026	7.29273	0	0	0	0	0	1.09861	2.89037	3.44681	3.33932	0	0	0	0	0	0	1.09861	0	0
102044_bclustnum_308_kamer_1_number_1	CAGAATGTTAGTTGATGGCGAAAGGTCGCAAAGTAAGAGCTTCTCGAGCTGCGCAAGGATAGGTCGAATTTTCTCATTTTCCGTCAGCAGTCCACTTCGATTTAATTCGTAAACAAGCA	0	0	0	0	0	0	0	0	0	0	0	0	0	0	0	0	0	0	0	0	0	7.7071	7.62989	7.37566	0	0	0	0	0	0
102044_bclustnum_351_kamer_1_number_1	TGCGCATGCGCAAACTATGCACATTCTACTTAATAACGACTTTCTAAAGTTTGCGCATACGTCCGGAAATAAGAAAAGCTTACTTCCGTCAGTTTTTTAAAATCATAGCTTCTAGAAGGTTTACAAGATTTCTAAAAAA	0	0	0	0	0	0	0	0	0	0	0	0	6.50831	6.45047	6.44144	0	0	0	0	0	0	0	0	0	0	0	0	0	0	0
102054_bclustnum_43_kamer_1_number_1	GGGACGCCTCACCCAGCACGCCCACCCGAACCAACGCCACCACCCGGCGCGACACGGGCGCCCTCGGGCCAAACGACCCGACCCG	0	0	0	0	0	0	0	0	0	4.81489	6.54355	6.6174	0	0	0	0	0	0	0	0	0	0	0	0	0	0	0	0	0	0
10207_bclustnum_2527_kamer_4_number_2	ACGGACGACCAGCTCCGCTGCTCCCTAGCACATTGCAGGGAGCGCGTTTGAATGGGATGCGACGCCCAGACCACGTGCCTC	0	0	0	0	0	0	5.27043	5.36247	5.10443	0	0	0	0	0	0	0	0	0	7.14677	6.94192	6.88628	0	0	0	0	0	0	0	0	0
102123_bclustnum_42_kamer_1_number_1	ATTGGTCCAGACAAGTTAGTATGAACAATCTCTAGTATTTCTTTAGAGGTGTAAGTTTTTCCCTTAAAACTTGACTTGTCATTTGCCTAACTGACATTGTTTGCACATTACATTATCAGGCTTCTTCAAATTAGGTAAACC	6.41333	6.54214	6.54325	0	0	0	0	0	0	0	0	0	0	0	0	0	0	0	0	0	0	0	0	0	0	0	0	0	0	0
102193_bclustnum_5_kamer_1_number_1	CACACACCCCTTAGAACGGGAAGCTGGTCCTGTCATCCCCAGAGGACCCGCTATACCAAACGGATACGGAGCCACCAACAGGTGG	0	0	0	0	0	0	5.59935	5.79606	5.87844	0	0	0	0	0	0	0	0	0	6.49564	6.6343	6.4599	0	0	0	0	0	0	0	0	0
10220_bclustnum_163_kamer_1_number_1	TTGAAGTTCATCAACCAATGGAGGGTAGTTAAAATATCAAAAGGAAATACAAAAGTTGCAAAATTTGAGTATCAAGAATACTTACAACTTGTGCTTGAAG	6.58534	6.54276	6.62751	0	0	0	0	0	0	0	0	0	0	0	0	0	0	0	0	0	0	0	0	0	0	0	0	0	0	0
102271_bclustnum_80_kamer_1_number_1	AGAGATGAAATCAGGAGATGCTTTTGCGTCAGGGGGACCACCTATTATGAAGTGTCCGTGCGGTTGGTTCTATACATATGGTGTTTCCTGAGC	0	0	0	0	0	0	7.07686	6.93807	7.03417	0	0	0	0	0	0	0	0	1.09861	3.39642	3.24843	3.62434	0	0	0	0	0	1.09861	0	0	0
102280_bclustnum_10_kamer_1_number_1	ACAAATATTGTTTGTGTTACATTCATTTGAAGTAGAAAAGATGGCTTGATCCTTAGCCATATGATAAGATGCGCCAGAATCAATGAGCCATTCATGCATAGTAGAAGAAGATGC	0	0	0	0	0	0	1.81011	1.7346	1.09861	1.42139	1.09861	1.51635	6.85885	6.91509	6.91365	1.46634	1.35812	0	3.502	3.26236	3.4761	0	1.50408	1.60944	0	0	0	0	0	1.09861
102322_bclustnum_110_kamer_3_number_2	TCTTCCTTTCTTTGGAACATTAAATAAGTAGAAGAATGTGAGCAATATAATTATTAATT	6.72982	6.52405	6.77239	0	0	0	0	0	0	0	0	0	0	0	0	0	0	0	0	0	0	0	0	0	0	0	0	0	0	0
10232_bclustnum_10_kamer_1_number_1	TTTTAAGAAATCATGTCAACCTTCTAGAAGCTGTGATTTTGAAAAATGGTGGAAGTAAGCTTTTCTTATTTCCGGATGAATGCGCAAGATATGAAAGT	0	0	0	0	0	0	0	0	0	0	0	0	7.65355	7.64773	7.62478	0	0	0	0	0	0	0	0	0	0	0	0	0	0	0
102416_bclustnum_33_kamer_1_number_1	GGATTTGGGAACACACTTGAAAACACAAGAAGTTTGATTTCTTGGCAGATCGATTTCCATAGTAGCAACAATTAGCTTCCAGAGAGCCACAAATCGAAGTAGTTACTGAGGAGCAAGTCATTTCTCAGGCACAATAACTTGACTTAGTTTACACGTAGTCGGGTACATTACAAGAGAAGATTCCGG	0	1.09861	0	0	0	0	6.67131	6.63306	6.6475	2.57515	2.7201	2.65324	0	0	0	0	0	0	4.95292	5.23299	5.24527	0	0	0	0	0	0	0	0	0
10242_bclustnum_454_kamer_1_number_1	GTTACAAAATGAAATTAAAACAAAATTTGTTAGATTATACATAGTAGAAATGAGAATTCAACACAATTAAGAAATATAATAGATTGCATACGATGTTGTGGCTTGGGTTGATTAATATGGATATTGAAAGGTTCTGCAACATAAGGTTTGGTTCCAATTGCAT	0	0	0	0	0	0	0	0	1.09861	0	0	0	0	0	0	0	0	0	0	0	1.09861	0	0	0	0	0	0	6.43423	6.6065	6.54135
102437_bclustnum_62_kamer_1_number_1	CAGTAAATGCTTAATAAGTTAACTGAACATCTATCAAGTTTAAGCATTCATTTGTGTGGTTACCAAGTATCAGCAGTGAATATAAGATCGGAGAGCA	7.2058	7.13772	7.26962	0	0	0	0	0	0	0	0	0	0	0	0	0	0	0	0	0	0	0	0	0	0	0	0	0	0	0
102467_bclustnum_732_kamer_1_number_1	AAATGCTTTGAGGACCGTTCGTCATGACTGGAGGCGTGGATCAATGGCGGAGATCTGAAGAGC	0	0	1.09861	0	0	0	5.20322	5.32626	5.24627	6.60349	7.629	7.629	0	0	0	0	0	0	4.90527	5.0814	4.87774	0	1.09861	0	0	0	1.09861	0	0	0
10250_bclustnum_731_kamer_5_number_3	GGCCCCCGACGACGTCTCCGGATTTCCTAACGTTGCCGTCCGCCGCCATGTCCCGGTCGGGAAATTAACCCGAT	2.72692	3.01694	3.01694	4.64026	4.45268	4.51399	5.38776	5.2976	5.35591	5.56342	6.55901	6.5472	6.1717	6.03787	6.18591	3.96489	2.86627	3.7744	5.33685	5.31742	4.99431	6.10893	6.08775	6.06146	0	0	0	5.08318	5.24928	5.07607
102523_bclustnum_18_kamer_1_number_1	GCGGAAACTAAGTCAATCCCTTTTCGATAAAGAGTATCACCAATGATTTTAAACTGTTGGGATTGGAACCGAATTTTACGACGTTCAGACTTTGAAAGCTCAGGCCGAAAGGATTGGGTTTGGCG	0	0	0	0	0	0	3.86703	3.98898	3.84588	1.38629	1.09861	1.50408	0	0	0	0	0	0	6.71901	6.66844	6.61271	0	0	0	0	0	0	0	0	0
102537_bclustnum_70_kamer_1_number_1	GACATTGAGGCAAAATTTGTGAGAAGGTTAAAGAAAGGATCAGGAAAATATCAAGGGAAGTTGCCCTCAAATG	0	0	0	0	0	0	0	0	0	0	0	0	0	0	0	6.93245	6.88682	7.04465	0	0	0	7.0871	7.0661	7.03916	0	0	0	1.88707	2.03688	2.68882
102548_bclustnum_60_kamer_1_number_1	ATTCGGTGCTTATTTGTTTTTCGTCTACATAGGTATGCTAGTCTATTCGGTTTAACATTAACATGGTATCAGAGCTAGACTGAATAGGACATCTTTACAAGC	1.60944	0	1.50408	0	0	0	0	0	0	0	0	0	6.96992	6.92096	6.9917	0	0	0	0	0	0	1.41369	1.70475	1.29928	0	0	0	0	0	0
10255_bclustnum_4579_kamer_2_number_2	GGGGGGGGAAGAGGGGAGGATTCCGGGGGGCCGCTCCTTTAAAAAAAACAAGAAGCGAAACACGACACGGAG	0	0	1.50408	0	0	0	0	0	0	7.07387	0	0	0	0	0	0	0	0	0	0	0	0	0	0	0	0	0	0	0	0
10257_bclustnum_534_kamer_1_number_1	CATCTTCTTTTTGAATACCCATTTATTCCAGTCGGAAACTTCACAAGATCCCAAGCCTCATTTTTATGCAAGGATGACATTTCATCAACCATGAGATCGGAGAGCGCGTG	1.09861	1.09861	0	0	1.09861	0	6.0562	6.14204	5.95785	4.55388	4.12534	4.15104	1.09861	1.60944	0	2.44235	2.62104	2.94444	7.25912	7.16723	7.18766	2.5123	3.07578	2.75154	0	0	0	1.34993	0	0
102606_bclustnum_34_kamer_1_number_1	GAAGAGAATAATACTAGACCATAACCCCAACTTTGACACAACCACCTAACGATGATCCTAGACCTCCCAAAACTGCTTCTTCAACCCTTGGTAGATAGATACTAGTAGATCGGAAGCGCGTCATGTAGGG	0	0	0	0	0	0	2.24543	2.49412	1.97716	7.03718	6.99001	7.07378	0	0	0	0	0	0	2.79321	3.05505	3.31216	0	0	0	0	0	0	0	0	0
102606_bclustnum_62_kamer_1_number_1	TAGATCTTAGTAGATCCACCTGTAACAAGCTTAGATCTAGAAAATCCAGCTCAAACTCAAGAAAAAAAGAAGTTGCCCAAAAAAA	0	0	0	0	0	0	0	0	0	0	0	0	0	0	0	0	0	0	0	0	0	0	0	0	0	0	0	6.95583	6.78163	6.78417
102628_bclustnum_45_kamer_1_number_1	ATCTTGTAAGCATTGTTAACTATACAATAAGCTCGGTAGATACTTACAATCTGAATAAGTGTATGTCACTAATAACAAACTTGATTGATATGTCA	6.74354	6.76427	6.69964	0	0	0	0	0	0	0	0	0	0	0	0	0	0	0	0	0	0	0	0	0	0	0	0	0	0	0
102629_bclustnum_97_kamer_1_number_1	GCAAGCCACAAAATGACGATAGGGTTTGTATACGCCCATGCCTATTTTGTGACCTGCTCCACTACTTCGCAATTTTTTCTTGATCACCAAATGCTCATGTTCGAATGTCCATCTTC	0	0	0	0	0	0	4.03522	3.94481	3.88728	0	0	0	0	0	0	0	0	0	6.52258	6.29219	6.22103	0	0	0	0	0	0	0	1.09861	0
102654_bclustnum_51_kamer_1_number_1	ACAATGGCTGTTAAACCAACTCTATTAAGAGATTTTGGAATCACTACTACAATGGTTAGAAAGCAAAATGAATGACCTGAATAAGATACAACTGAAATTGTTGATTACAGATCTCTGTTCTGCACCATTAGATCCTTCTTGATC	6.77504	6.81986	6.79315	0	0	0	0	0	0	0	0	0	0	0	0	0	0	0	0	0	0	0	0	0	0	0	0	0	0	0
102706_bclustnum_72_kamer_1_number_1	TTAAGATAACTGTCCCTTTTACAATAATATTTGCTCAAGTCCTTGTTGCCATTGCTAGAATTATGTTTGCCCTTTTTCGTCTTACTACCGAGGGAAGGATCCTCTCCCCAAGGATTTTTCTCATGCGTATGCCCTT	0	0	0	1.09861	0	0	6.71113	6.67456	6.7546	0	0	1.09861	0	0	0	0	0	0	3.43399	3.71357	3.49098	0	0	0	0	0	0	0	0	1.94591
102708_bclustnum_33_kamer_1_number_1	ACATAAAAACCTAATAAATGTGGTTTATTAAGTTATTTTACATAGTGAAAGAAATTTTACTTAGGGTAAAATCGGTCTTACATGGTGTACTTGGGTCCATCTAATGATAA	0	0	0	0	0	0	1.09861	1.09861	0	5.91566	6.53	6.5364	0	0	0	0	0	0	0	1.09861	0	0	0	0	0	0	0	0	0	0
10271_bclustnum_494_kamer_1_number_1	CGGAAGTCCCATCACTCCGAGCCATCATCCACATCCGAAGTATATCTATGAACTTATACCTATGTTTCATGCATGTTTAGAT	0	0	1.09861	0	0	1.09861	0	0	0	1.60944	0	0	3.3673	2.94444	2.77259	3.13549	2.03688	1.60944	0	0	0	6.45047	6.59363	6.57985	1.09861	0	0	0	0	0
102773_bclustnum_18_kamer_1_number_1	CTTTTAAACAGTGAAGCGGGTTTTCAGATATTTGCATGGCACTTTTTGTGGCTGATTTTGTCACCCCCCTAGAGACAGCCTAGACTTGCCATTGA	0	0	0	0	0	0	5.65424	5.61495	5.66988	5.41906	5.7638	5.7462	1.50408	0	1.60944	0	0	0	6.64769	6.85066	6.70012	0	1.09861	0	0	0	0	0	0	0
102804_bclustnum_20_kamer_1_number_1	AAATTTGTGTCAGATATCTCCACTGCGGACGACCCAATTTTCTGCATGTGGCCAGTTTCAATATCAAGTTGCAGTTTTCCACTTTCAATGACCAGACTTTTAGACTGGCTGTCAAAAATAACGCTCTGGATTACAAAGGATTCATCTATGTCAAA	0	0	0	0	0	0	6.65028	6.54679	6.54965	0	0	0	0	0	0	2.04307	1.78059	2.23084	2.3979	2.3979	2.19722	1.6614	1.55814	1.94591	0	0	0	0	0	0
102809_bclustnum_118_kamer_28_number_6	CACCATCTTTCGGGTCCCAACAGGTGTGCTCGCACTCGAACCCTTCGCATAAGTCAAGG	2.30259	3.20275	3.18635	3.95508	3.48431	3.95763	5.5347	5.48064	5.64073	5.9831	6.84871	6.69084	4.88784	4.83628	4.79303	5.45104	5.44242	5.27471	7.0775	6.75149	6.68919	6.37104	6.3087	6.26593	4.40672	4.84419	4.73795	4.68213	4.66344	4.62823
102973_bclustnum_142_kamer_4_number_2	TAGGTACAACATTACATAATAAAATAGTAAAATTTAAGCAATATTATGCAATGTGTGCAACACCAATACTCAATGT	6.60646	6.65471	6.60607	0	0	0	0	0	0	0	0	0	0	0	0	0	0	0	0	0	0	0	0	0	0	0	0	0	0	0
10298_bclustnum_5211_kamer_1_number_1	ACTATCCATAGATGAAGAATGATCCAAAATAGAAGAAAAAGCATAACAAGAAGAGGAATTATATTGCAAATCGTTAGGATGGATCATAGGCTAAAGATGGCACAAATGTTAAATCATGCATGTAGGATGAGAAATTTTCATCAAACTTATAATAATGACTTATGATGTATTAGGTAAAATAAGTCTATAACCTTTTACAT	0	0	0	0	0	1.09861	5.34506	6.20523	6.91274	0	0	0	4.00733	3.73767	4.02535	1.09861	1.09861	1.09861	1.60944	2.70805	2.3979	1.55814	1.60944	2.32239	0	0	0	0	0	1.09861
102_bclustnum_0_kamer_1_number_1	TTGGCGCATAATCTCGGAAACCTGCTGTTGCTTGGAAAGATTGGTGTTTTCCATAATAGACGCAACGCGAGCAGTAGACTCCTTCTGTTGATAAGCAAGCATCTCATTTTGTGCATATACCTGGTCTTCGTAT	0	0	0	0	0	0	0	0	0	0	0	0	0	0	0	0	0	0	0	0	0	8.30032	8.25072	8.0207	0	0	0	0	0	0
102_bclustnum_4447_kamer_1_number_1	GGCGCAAATCTCGGAAACCTGCTGTTGCTTGGAAAGATTGGTGTTTTCCATAATAGACGCAACGCGAGCAGTAGACTCCTTCTGTTGATAAGGAAGCATCTCATTTTGTGCATATACCTGGTCTTTCGTATT	0	0	0	0	0	0	0	0	0	0	0	0	0	0	0	0	0	0	0	0	0	6.93294	6.88755	6.652	0	0	0	0	0	0
10301_bclustnum_3670_kamer_1_number_1	TTCTGGTTCAAATATTTCTTAACCTTTATTGATGATTACTATAGATGCACTTGGGTTTATTTCCTAAAACTTAAGATCGAAGTATTTAACATGTTCTTGGCCTACAAGGACCTTGTTGAAAAACAATCTGGTCATCAAATTATTAAGTTAA	0	1.09861	0	0	0	0	6.17676	6.12437	6.22456	1.09861	1.09861	1.51635	7.30038	7.30711	7.2807	1.09861	1.64866	1.31568	5.95139	6.02206	6.0348	0	1.49393	1.09861	0	0	0	1.92529	1.09861	2.2736
103021_bclustnum_130_kamer_1_number_1	GACAACTGTGAAGCCATCAAATGGTTCAATAGGTATCTTTCTTTTTCTACCTCTCTGCAT	6.92045	6.94773	6.87489	0	1.09861	0	0	0	0	0	0	0	0	0	0	0	0	0	0	0	0	0	0	0	0	0	0	0	0	0
10308_bclustnum_156_kamer_1_number_1	GATCGGATGATGTTGTATTGAAGCATTGGCTAAGATAATTGCATGACTATATGACATATGCCTTTGTGTGTACGAATTTGCTCTGAAAAACTATGAGA	0	0	0	0	0	0	0	0	0	0	0	0	7.27371	7.28505	7.2519	0	0	0	0	0	0	0	0	0	0	0	0	0	0	0
103117_bclustnum_708_kamer_1_number_1	CTAGAGCATTATCCTCTTGGAAGCCATTATCAAGAAGAAACAACAAGAGTCTATAGGCATTCCAAATTGCATATCTGGTCCTGAGAATAGTTCTTTTCCTGTGTCAAGCTCACTAAAAAATGAAATAGAGGTCCTG	0	0	0	0	0	0	6.48942	6.60684	6.55292	5.32022	5.08347	5.07517	3.66356	3.95508	3.64284	4.9093	4.62573	4.72739	6.19577	5.75257	6.12406	4.54233	4.64176	4.483	0	0	0	6.8072	7.2233	7.26333
103119_bclustnum_26_kamer_1_number_1	GATCCTAGTGAGTTTGATAGAATAGAGTTTTTTCTTGCTGAAATTAAACTCTAATGAAAAGTTAAATGCATGTGGTAAACATTACAAGAAGA	0	0	0	0	0	0	0	0	0	0	0	0	1.09861	0	1.09861	0	0	0	0	0	0	0	0	0	0	0	0	6.61904	6.59441	6.61577
103229_bclustnum_40_kamer_2_number_2	TTTTGAATTTTGAACTTAGAATAGCAGTCAAATTGAACATGAATGACTAAAATTCCAAGTGTCTTGGACAAAATATTCAACGTTAATACTTATTCAAGTTG	0	0	0	0	0	0	0	0	0	0	0	0	1.09861	0	0	0	0	0	0	0	0	0	0	0	0	0	0	6.98101	7.01481	7.02429
10335_bclustnum_1311_kamer_1_number_1	GATTTCATCCTCTGAATCCATTGCCTCCCTGACAGTTCTAGGGTCATCATTTAAATCAAAATCTATTTTCTCTGGTTCTTCTATACCAGAGTATGAGGATCTTATTCTTCTTCTGATTCATCATCAGTAATATACAAAGCAAAATTTGAACAAAAATTAGATGGACTATACCTTTCTGGTACCCTTCTTTCTCGAACTGATCTCCTCAATA	0	0	0	0	0	0	6.14776	6.114	6.13917	4.63715	4.96783	4.9258	0	0	0	4.71949	4.85463	4.69957	7.21969	7.16647	7.19269	5.10534	5.09804	5.12924	0	0	0	2.3979	1.60944	1.09861
103384_bclustnum_265_kamer_1_number_1	ATAAGCTTGCTTTGAGCACTCTAATTTTTTCAAAGTAACAACGCCGGAACCGCGACCCAGCCAATTAGGCCAGAGCACGCCGCCGGCAAAAGGGACGGGAGGGCAGTC	4.56226	4.47734	4.54754	5.51906	5.51585	5.46722	4.79248	4.76217	4.63279	5.40627	6.00339	5.94542	5.90318	6.07489	6.00734	6.243	6.71611	6.66185	5.54674	5.26579	5.43285	6.12074	6.09131	5.94122	5.96301	5.98595	5.86477	4.87977	5.06639	5.1023
103430_bclustnum_136_kamer_1_number_1	GAACGGCCTCTCCAAGGTTTTTCAAGCCAGACGTTAGTCTTCTGCCAAGTAACAGCCCCCTTACGCTTGCCATCAATGTAACGGCTCCAGAAGTTAAAGACCCGAAAAATTGCTAAAATAGTAAGTTGTGTTGCAACATAAAAACTGAAATAACTGATGGTGGGGGTTCAAAAGGAAT	0	0	0	0	0	0	3.52636	4.13677	3.24519	5.82777	6.64275	6.61927	1.94591	2.05839	2.52	1.52606	2.83321	2.07944	4.35028	3.92395	4.01096	2.15176	1.82455	1.43508	0	0	1.09861	1.43508	1.09861	2.10413
10343_bclustnum_236_kamer_1_number_1	ACTCGTCTTTTGAGGAACAAGTGATAAACAGGGATAGCTACAGATTCCAGGTACAGGTTGGAATTTTCCAATCACGCAATATACAAGGATGGCTAGGTAAGATCACTCTTCGCAGTTGT	0	0	0	1.09861	0	0	7.93994	7.91767	7.86902	0	0	0	0	0	0	0	0	0	2.57884	2.25606	1.77649	0	0	0	0	0	0	0	0	0
10347_bclustnum_201_kamer_8_number_2	TCATGGCTTCTCTCAGAAAGATGGGATAGATTATGAAGAAACTTTTGCTCCTGTAGCCAGGTACACTTCCATCGATCAGACTTGCTTTGGATGTAGT	3.57954	3.7744	3.3474	1.88707	1.09861	1.09861	4.55388	4.47506	4.68521	5.97211	5.51262	5.37836	6.51669	6.45222	6.39229	0	1.09861	1.88707	4.21065	4.29046	4.23893	2.56495	1.99243	2.10413	0	0	1.09861	2.16905	1.86075	2.44235
103500_bclustnum_96_kamer_1_number_1	CAATCATAGTCGGCAACTTGATGTATGCAATGGTGTACACAAGACCAGATATTGCAGATGCAGTGGGAGTTGTGAGCAGCTAT	1.09861	2.19722	1.71765	0	1.09861	1.09861	2.02438	2.25878	2.84781	2.31677	3.08453	2.58669	5.90944	5.97254	5.94738	5.94542	5.68017	5.7478	2.62104	2.22462	2.77259	6.72743	6.82871	6.806	0	0	0	5.8861	5.82895	5.8999
103517_bclustnum_55_kamer_1_number_1	TGAAATTTCTAAATTATGAAAGATCGCAAAAGATGACAAAAGACCATGAAACCTTCTAAA	0	0	0	0	0	0	0	0	0	0	1.09861	0	0	0	0	0	0	0	6.46407	6.65183	6.52503	0	0	0	0	0	0	0	0	0
103561_bclustnum_5_kamer_1_number_1	ATCTACTGCTTGACATCAGGGCATTCCGTTTCAAATTCATATTCTTTATAATATAAAATATGATCATTGGGACATGCATCAATTGCTTGATACTCCA	1.66501	2.09714	1.09861	0	0	0	0	1.09861	0	0	0	0	1.17865	1.09861	1.09861	0	1.94591	1.38629	1.09861	0	0	1.46634	1.09861	0	0	0	0	6.79955	6.71377	6.79284
103568_bclustnum_28_kamer_1_number_1	AAATTTGGTGCCGTGTAGAAACCCCAAAATTAGCGCGCCGCATGGAAACCACAAATTTTGGGCGCAGCATGGATATCTAGGGAAACATTTACCCATGTTTCTTTTTTGGAGCGACCTCGGGCGCTGCATGGGGGTGTTTCCCTAGCTTATATATATTTATTCAAAGGGATAGGGATA	0	1.09861	0	0	0	0	3.3673	4.50456	3.94297	0	0	0	0	0	0	0	0	0	7.67717	7.30317	6.79879	0	0	0	0	0	0	0	0	0
10367_bclustnum_199_kamer_87_number_2	GGTTACAGAACATTTGGTATCAGAGCTTTGGAAGATCGAAGAGGTCGTGTAGGGAAAGA	1.09861	0	0	0	0	0	7.2222	7.19594	7.14164	6.34681	7.55956	7.48268	0	0	0	0	0	0	7.00033	6.74935	6.59058	0	0	0	0	0	0	0	0	0
10367_bclustnum_28_kamer_1_number_1	GTATTGGAGGTTTCCCCCTCAAAGTGGCTTATTTATAAGGCGTTGATATCTTTTTTCTTCTATTTTTGGAGCTGGTACAGATGGAAGAGCGTCGTGTAGGGAAAGAGTGTAGATCTCGGT	1.09861	1.20397	1.60944	2.07944	2.60269	2.83321	2.52	3.14784	2.78148	5.69128	6.78446	6.76273	2.63906	1.09861	1.60944	0	1.09861	1.09861	1.79176	1.09861	2.66921	1.09861	0	1.09861	0	0	0	2.76001	2.68102	1.5506
10369_bclustnum_251_kamer_1_number_1	CCTACTTACCTAGAATAGCCTAACCAATCCTAGCATAGCGTATCCTAACCTATCCTAGGCTAGCCTAGCCTGCTCTACC	0	0	0	0	0	0	1.09861	0	1.09861	3.07961	3.62624	3.79174	0	0	0	6.61473	6.75285	6.68054	2.70805	1.94591	1.84583	4.70048	4.93806	4.7728	0	0	0	0	0	0
1036_bclustnum_3384_kamer_1_number_1	TTATAATGTATTTATCTCTGGGTACGCAGGTTCCCTCAACCTTACCTTTTGTCCCATATGCACCCAACGTTCACATTCTTCCAAAGCATGTTTACCACTCCCAATCAAAAAGGGATTTTGGCTTACCTGCGGGTATGCAC	0	0	0	1.8718	1.09861	1.35812	5.4848	5.0471	5.55683	0	0	0	0	0	0	0	0	0	8.02872	7.95318	7.95219	0	0	0	0	0	0	0	0	0
103740_bclustnum_33_kamer_1_number_1	ATTGAAGAAATCCTTATACGGATTGAAGCAAGCTCCTAGAGCTGGGCTTACCAAGAGTAAAGC	2.97041	2.56495	2.83321	1.50408	1.09861	0	0	1.09861	0	1.50408	0	1.50408	3.49651	3.77963	3.421	6.90073	6.61562	6.62672	1.09861	0	1.09861	6.84183	6.83798	6.80217	0	0	0	1.79176	0	0
10380_bclustnum_652_kamer_1_number_1	AGCTTCGCAAAAGTTTATGGATCATGATTCTAGGAAACTTAAGCCAAAAGAGAAGAGGCTCGCTGAAACTGAGAACGTGTTCCGCGTTCATTTCCAAGACCACACCATCGCCGTTCATCTCTAG	0	0	0	0	0	0	0	0	0	0	0	1.09861	6.87378	6.91909	6.96979	3.63759	3.46574	3.52636	0	0	0	3.12579	3.13549	2.61007	0	0	0	0	0	0
103885_bclustnum_35_kamer_20_number_2	AACATGGAAAACTAGGTCTACCGTGAAATGCAGGCAACTCCAATTTGTATGC	1.09861	0	0	0	0	0	3.85862	3.23475	3.58906	3.02529	2.98568	2.48491	0	1.09861	0	7.27503	7.12432	7.23288	3.21888	3.35341	3.65325	7.35334	7.30586	7.36277	0	0	0	1.94591	1.60944	2.05412
103949_bclustnum_16_kamer_12_number_2	TGTCACTCTTGGCTAACCCCAAGAACTTTATACCTTTGGGAAGTGAAGGTGGAGA	6.9741	7.0141	6.95521	0	0	0	0	0	0	0	0	0	0	0	0	0	0	0	0	0	0	0	0	0	0	0	0	0	0	0
104022_bclustnum_96_kamer_1_number_1	CGTTCTTGGAGTTTTCTTCGGAACACGTGGATTTTGCCTCTCATTAGCACGCCTAATTTATTGGGTGTTGCCGGATGTGCTTGTGTCGATTCCTTGATGGATATAC	0	0	0	6.57925	6.52913	6.43358	0	0	0	0	0	0	0	0	0	0	0	0	0	0	0	0	0	0	0	0	0	0	0	0
104066_bclustnum_174_kamer_1_number_1	AGCTAACGAATGGCACTTTGATTATCACACCATAGTGGAGTCTTCCTGACTAGCACGAACGGTTGCACGATACTCGACTTCAGCTGAAGAAAGAGCAAGGGCAGTTTGTTTCTTAGAA	2.60269	2.74084	2.3979	0	1.8718	1.09861	6.67456	6.72263	6.59987	1.94591	2.07944	2.30259	2.35138	2.35138	2.0149	1.09861	1.09861	1.60944	7.11192	6.9861	7.00307	2.14007	2.3979	2.83321	0	0	0	2.19722	1.83621	1.89256
104118_bclustnum_94_kamer_1_number_1	ATCTCACACACTCCAGAACAGACCAATCCTATGCACTTGTGCAGTCCTAGGTTCATGCAGGGGCTGCATGAGCTACATCGAAAGGTTGCAAA	6.65944	6.63755	6.64682	0	1.09861	0	0	0	0	0	0	0	0	0	0	0	0	0	0	0	0	0	0	1.09861	2.0149	2.60269	2.99573	0	0	1.09861
104159_bclustnum_79_kamer_5_number_4	CCTGAACGCGCCCGCCCTGAACACTGTTCTCCACGCGTCCTGCGGAAGGAACCCGACTCGCCATGCC	0	0	0	0	0	0	0	0	0	6.25465	7.94363	7.98602	0	0	0	0	0	0	0	0	0	0	0	0	0	0	0	0	0	0
10416_bclustnum_176_kamer_1_number_1	AAGGTTCGAATAGAGTGGGTTGGTCATTTGTTATTAGACATGAACCAAGAGGAAGGCCGGTAAAGTATAACGTAGATGAAGATCAAGAGGGTATTGAAGAGGATGATGATGTAGATG	0	0	0	0	0	0	0	1.09861	0	0	1.09861	1.09861	0	0	0	0	0	0	0	1.09861	1.09861	0	0	0	0	0	0	6.65521	6.68632	6.67008
10420_bclustnum_120_kamer_1_number_1	AGTATAATCGAGTTGTCGGTGCTTCGCCGGTTGATTTCTGTGCCCCGAAGATCGGAAGAGCGTCGTGTAGGGAAAGAGTGTAGATCTCGGTGGTCGCCGTATCCTTAAAAAAAAAAAAGA	0	0	0	0	0	0	0	0	0	8.54636	0	0	0	0	0	0	0	0	0	0	0	0	0	0	0	0	0	0	0	0
104233_bclustnum_33_kamer_1_number_1	CCTCAACCTCGATCCTCAAGATATCAACTCTGATAAAAGATATAATAAGTTTACTTGAACATGCCTCTATAAACTCTATCTCAGAATAGACATCACCAAAACATACATAACTCTTCT	6.90803	6.76357	6.85981	0	0	0	0	0	0	0	0	0	0	0	0	0	0	0	0	0	0	0	0	0	0	0	0	0	0	0
104247_bclustnum_247_kamer_1_number_1	GTCGGAAAGCGTCGTGTAGGGGAAGAATGTAGATCTCGGGGGGAGCCGTATCATTAAAAAAAAGACGAGTAGTGCTCTTCATGGACGGACTGACAGAACCTCTGAAAGGTTGGGTAAAGGGGTTCAATCCTGCCAC	4.96109	5.0073	4.9218	0	0	0	0	0	0	6.69001	0	0	0	0	0	0	0	0	0	0	0	0	0	0	0	0	0	0	0	0
104281_bclustnum_2_kamer_1_number_1	AATGTCATGTACATGTATCAAAAAGTACATATATATCCAAAAGTAGATATATA	0	0	0	0	0	0	0	0	0	0	0	0	6.64665	6.45865	6.49979	0	0	0	0	0	0	0	0	0	0	0	0	5.16479	4.90527	5.08883
104352_bclustnum_421_kamer_1_number_1	ATTGTTGATAGACTGATCAAGTACACACACTTTTGTGCACTCTCTAATCCCTTCAAGCTATATAGTTTCCACCGCAATCATGGAGACAATTCAAAAGCTACATGGCAGCCCAAAGATTATTGTAAATGACAGAGATCCCCTCCT	0	0	0	0	1.09861	0	3.8764	3.3596	3.23868	3.06027	2.89037	2.62467	1.09861	1.09861	1.09861	8.04003	7.92923	7.91904	3.42318	3.29012	3.63961	8.02355	7.99449	8.01698	0	0	0	0	0	1.09861
104357_bclustnum_120_kamer_1_number_1	TCGTGAGAGTCGGTGGCACTAACACGGACTTGTGCTCCCGCGTACCGTCGCGTATATGGGAG	0	0	0	0	1.09861	1.09861	7.70825	7.68562	7.43551	4.09672	4.28654	4.30599	0	0	0	0	0	0	6.29785	6.41575	6.20014	0	0	0	0	0	0	0	0	0
1043_bclustnum_7591_kamer_1_number_1	GATCTACACTCTTTCCCTACACGACGCTCTTCAGATCTAATGGCCAAATTCACTGGGTCCATGCGGTATCCAACTACCCAAGTGAGACACAAATTGAC	2.3979	1.60944	1.09861	0	0	1.09861	0	1.09861	0	11.1439	0	0	1.09861	1.60944	0	0	0	0	0	0	0	0	0	0	3.02313	3.61092	2.73725	0	0	0
104412_bclustnum_56_kamer_1_number_1	AACCTTGGAATGAACTGACTTCTTTGCGAAATATAGAATGAGTCCACGGAACAATTGTTTGACAGGATGGT	0	0	0	0	0	0	0	0	0	0	0	0	7.09202	7.00921	7.06732	0	0	0	0	0	0	0	0	0	0	0	0	0	0	0
104418_bclustnum_158_kamer_6_number_2	ACAATAGCTAAAAAACATTGTCGGGAACATGGACTGTTGAGGGGGGCATGAATATCGTCC	0	0	0	0	0	0	0	0	0	0	0	0	0	0	0	0	0	0	0	0	0	0	0	0	0	0	0	6.55393	6.50976	6.50079
104475_bclustnum_36_kamer_1_number_1	TCATGTTTTTTGTTTCATTAAATTGCGATGCATTGGCATCAATGACAAACCATTGGCGGTTCTCTGGGGATCCATGAGTAGCCAACAAAGCCTGGAGCCTTACATACTGTGCATAAAATGAATCTGATTTTTAGATC	0	0	0	0	1.09861	0	0	0	0	0	0	0	0	0	0	6.88397	6.69394	6.66505	0	0	0	6.511	6.51693	6.39693	1.46634	1.09861	1.09861	0	0	0
104496_bclustnum_129_kamer_1_number_1	GTTGGCTTTTTTTCTTATAAGGCCCATTTTAGACCTCAAATTTCCTCTAATGATTTGTCATGTAGGTACATCGCCCAGAAGACTGTTATTTAATTCAA	0	0	0	0	0	0	6.18002	6.21527	6.24158	6.9675	6.68942	6.75843	5.42983	5.45959	5.33486	3.02529	2.75154	2.87168	5.70156	5.96358	5.77677	3.10608	3.11795	2.92674	0	0	0	3.65498	3.73767	3.7612
10456_bclustnum_243_kamer_1_number_1	TTATAGGGTCTGTCCATAAGAAGAAAGCCTCAGATTCTGGTTCAGAAAAATCTCAAGAAGATGGTGATGCTTTCACTGTAGCCTTGGCAGCACTTGCATCCCATTTTAAAACCATATTACCAACTCAAAATTC	6.4658	6.50645	6.48701	1.09861	1.46634	0	0	0	0	0	0	0	0	0	0	0	0	0	0	0	0	0	0	0	0	0	0	0	0	0
10456_bclustnum_394_kamer_1_number_1	TAGAGTAAAAATACTACATCAATTACTTGTATTTATTGCATAGATAATGATGGATTTTGATTGACTTGGCAGCACTTGCAAATTTAGAGCATCAAAACCCTCCAAAAGGTCCCAAACTCTATGTTTATAATCTTTTAAAATATT	0	0	0	3.59731	3.26236	3.35185	0	0	0	6.54227	6.63955	6.57193	1.09861	1.60944	1.09861	0	0	0	0	0	0	0	0	0	0	0	0	0	0	0
104582_bclustnum_7_kamer_8_number_3	AAAAATGACGACAAATCACTTGACTCATTTTGTGTATGTTCAAAGGCGACTCAAAAAACTGACACTTCCAGCAA	0	0	0	0	0	0	0	0	0	0	0	0	0	0	0	0	0	0	0	0	0	0	0	0	0	0	0	6.45408	6.57188	6.56063
104634_bclustnum_33_kamer_1_number_1	GCTCTAGATGATATGGATCAGGACGTTGCAGTGATGATGATCATGAGTACATCAAGATGATGTATGGTAAGTGTCAGAGAATGGAGTAATAACTAAGAACGTTTCAAATAAATTCCTAACAACTTGTCCTGGAAAAATATAA	0	0	0	0	0	0	0	0	0	0	0	0	6.84162	6.85356	6.94938	0	0	0	0	1.09861	0	0	0	0	0	0	0	0	0	0
104637_bclustnum_99_kamer_1_number_1	TTGATTATAGCCTGAAAAACCATCTAAGAAAGAATATACTTGACAACCAGATACTTTGATCAACGTCTCGTGAGCGTTGATTAAGCGGAACCCTCCATCATCCCAATAAACCCCTGCAAACAAGAGAATAGAGAGTTAAAG	3.11352	3.157	3.27714	0	0	1.09861	2.48491	2.25129	2.35138	1.09861	1.09861	1.09861	0	0	0	0	0	0	2.56495	2.94444	2.5337	0	0	0	6.48551	6.58735	6.49634	0	0	1.09861
104653_bclustnum_193_kamer_9_number_2	ATACTTGAAGATACAAAGGTTGGCTACACTCAAAAACTTAGAAGACAAGTCATAACAAAG	6.39415	6.51075	6.51224	0	0	0	0	0	0	0	0	0	0	0	0	0	0	0	0	0	0	0	0	0	0	0	0	0	0	0
104779_bclustnum_62_kamer_1_number_1	CTCTAAGAATTCTTCTCCCATAATCACCTTACCTGATTCCCCGACAGGTGAATCCTCTCCTCCCGAACTTTCCGCCGCATTCAGCTGTAGAGACATCTATGGCTAAATCAAAAAACGGTGGGAAGAAGAAAGGAAAGAAGATAAAGCTCCCAAGGAGAAATTAGAAAAGAC	1.09861	0	1.09861	0	0	1.09861	3.19395	3.14216	3.50579	1.09861	0	0	0	0	0	0	0	0	7.40944	7.24521	7.33734	0	0	0	0	0	0	0	0	0
1047_bclustnum_3015_kamer_14_number_2	ATGGACCCAAGCCAACATAAATAAAATAACATTCTATGTAATATGGCCCAATTAAGGGGTAATGTGGCATGATGTACAGGTTAACATGTACGGTGATATTTCCAATGTGG	0	0	0	0	0	0	0	0	0	0	0	0	1.60944	0	1.94591	5.68968	6.28086	6.03117	0	0	0	6.45008	6.51286	6.47505	0	0	0	0	0	0
104813_bclustnum_111_kamer_11_number_2	CCCGACACTCACTTGTGTTGTGAGTGGAGCTCTTATGGAATTCACACCACTTTCCTATGTCTTCTTCGCTTCAC	2.19722	2.10413	0	0	1.09861	0	7.65044	7.62859	7.63067	7.78424	7.80576	7.73086	3.80029	3.20738	3.72741	6.26449	5.96358	5.97744	8.55705	8.42386	8.38633	6.27476	6.35138	6.32921	0	0	0	1.09861	0	1.09861
10483_bclustnum_1114_kamer_1_number_1	AAATGAAACTGTTGAAGAAAACCCATCCATCTGAAGTGCCTAGCTTGTTGTAGCTTTGTCTGTGATTGTAAATATTGCAAGGTTGTG	0	0	0	1.38629	1.09861	1.09861	4.07754	4.02088	3.83406	3.04452	3.3322	2.95751	1.38629	1.50408	0	7.48605	7.6014	7.55799	4.40976	4.24492	4.2485	7.5365	7.59211	7.53075	0	0	0	3.17805	2.91777	2.50553
104850_bclustnum_373_kamer_37_number_3	GACTCATGTTTAGATTGGCAGTTGTAATGCTAGCTCTGAAACTTTGAAGGCACTATCTTGTTGGGAGAAACTT	0	0	0	0	0	0	0	0	0	0	0	0	0	0	0	6.61146	6.20167	6.31122	0	0	0	6.45632	6.41416	6.43317	0	0	0	0	0	0
1048_bclustnum_362_kamer_1_number_1	TTAACAGAACCTTAAACTTAACTTTACCCTTAACCTAACCTTGACCAAACCCTTAGCCTTCACAGATCGGAAGAGCGTCGTGTAGGGAAA	0	1.09861	1.60944	0	0	0	0	0	0	6.94623	7.87588	7.75086	0	0	0	0	0	0	0	0	0	0	0	0	0	1.60944	0	1.09861	0	0
104917_bclustnum_100_kamer_1_number_1	TTTGGGGAACACTCAAATTTGAATTCACTTATAAATATCTTCCGCCAAATCCCCATGGAGAAAAGTTGTTTTTACATCTAATTGTTCTGTATGCAAATATTCTACTGCCACAAGACTTAAAATAGTACTAATTG	2.80336	2.62467	2.32239	0	0	1.09861	3.00027	2.94444	2.99188	0	1.54045	1.335	4.1603	4.29046	4.38316	6.51417	6.29308	6.51552	3.58604	3.13549	3.48543	7.04744	7.01726	7.03759	1.09861	1.09861	1.8718	5.9603	5.95889	5.9603
10494_bclustnum_1553_kamer_1_number_1	ATAAAATCAAAAAGGTGTAAAATAAACAAATTGTAAAACAAAAATAGGAAAACGTATAAAATGTAAAGTTATATTTTAAACATAATAAATTAATTATTCAATGTGTTATGCAGGCCGCGGCTGCTACAGCTAAA	4.46335	4.523	4.483	0	0	0	1.09861	2.3979	1.94591	0	0	0	0	0	0	0	0	0	0	0	0	0	0	0	6.35586	6.65698	6.62778	0	0	0
104952_bclustnum_46_kamer_2_number_2	ATTTGCACAGTTGAGGCTTCGCCCAATACTTTAGATTTAATCCCTTATATTTGATCATACAATTAGCCATTTCTTTATGTGACCTCTAACTTGAACCTGGGGCCCAAA	0	0	0	0	0	0	1.09861	1.60944	0	1.43508	0	1.09861	6.7981	6.70656	6.70284	5.6113	5.71785	5.70378	1.42139	0	1.71765	5.81338	5.9135	5.90876	0	0	0	3.50513	3.20545	3.31054
10495_bclustnum_947_kamer_1_number_1	CACATCTTATGTCAAAATTATTACATGCATAACATAAACCAAAAAAATATAGTTTGATACT	4.21951	4.33511	4.25703	4.07073	3.79549	3.13549	2.83321	2.85647	2.14007	0	0	1.09861	0	0	0	0	0	0	0	0	1.09861	1.09861	0	0	6.91208	5.51209	7.01151	1.09861	1.09861	1.09861
104_bclustnum_2904_kamer_1_number_1	ACCAGTGGGGTCTGAGCCATCAAATTTAGTGACATCCACCCGTGGAAGGCATATGTCCCTTTGAAAATGATGTGGTTGAAAGGAATGGGCAGAAGTTTCTCCTTCAGTCTTTTTAGGTGCATCATCATCGAGAGGGTTTTGATT	0	0	0	0	0	0	0	0	0	0	0	0	0	0	0	6.16572	5.69661	5.68407	0	0	0	6.45542	6.54514	6.54863	0	0	0	0	0	0
104_bclustnum_4754_kamer_2_number_2	CCCAACCAGTGGGGTCTGAGCCATCAAATTTAGTTACATCCACCCGCGGAAGGTGTATGTCCCTTTGAAGGAAGGGAA	0	0	0	0	0	0	0	0	0	0	0	0	0	0	0	6.7511	6.21432	6.3287	0	0	0	5.96211	6.006	6.0494	0	0	0	0	0	0
10502_bclustnum_2023_kamer_16_number_2	GGACGTGCCTTGCGTTGTGTTGGGGCGCTCAACCTTGGTCAGGCCGGATTAAAAAGACTACCTCCAAGCCAAAATTTGTTCTTATCTATCCTCAGCTCTCTTTT	0	0	0	0	0	0	0	0	0	0	0	0	0	0	0	6.70196	6.64275	6.61714	0	0	0	1.28093	1.29928	1.77307	0	0	0	0	0	0
105075_bclustnum_120_kamer_7_number_2	GAGCATGTTGTAATGTTGGAATTTCTTGCTATTCATGAGGTGAAGAGGGTTTGATGCTGGGAGGATGATGCT	0	0	0	0	0	0	6.09615	6.19353	6.08189	0	0	0	0	0	0	0	0	0	6.57308	6.48158	6.68443	0	0	0	0	0	0	0	0	0
105079_bclustnum_101_kamer_1_number_1	AATCCTGGATCCCATGTCAAATTGGAAGTCATCACTTCCAATCCCCACTAACTGTTGATGTTCCCTACT	0	0	0	0	0	1.09861	2.10413	1.09861	1.09861	6.64801	7.35327	7.44736	0	0	0	3.44999	2.91777	3.46574	0	0	0	3.65066	3.49651	3.80666	0	0	0	0	0	0
105104_bclustnum_19_kamer_1_number_1	ATGACCGGAAAATCAAACAAATATAGGTTTGTTTAATATTTCCTTTTGGGGTTTCCTGTTTAGACCGTAAACAACCTAATAAATG	0	0	0	0	0	0	0	0	0	6.28925	6.65157	6.61372	0	0	0	0	0	0	0	0	0	0	0	0	0	0	0	0	0	0
105142_bclustnum_159_kamer_1_number_1	ATAAGCTACATGACAAATAAGAGTTAAGGTATGGAGTATGATTCGTCAAAGTGGATTTCTTATCCTATCTTAGAGATAAGATGGATAAGCCTGTAAGTTCTATAA	0	0	0	6.89061	6.81958	6.80484	0	0	0	0	0	0	0	0	0	0	0	0	0	0	0	0	0	0	0	0	0	0	0	0
105142_bclustnum_202_kamer_1_number_1	AGGTTTTCTTAAAAGATAAGCTTACATGTACATATAAGAGTTAAGGTATGGAGTATGATTCGTCAGAGTGGATTTCTTATCCTATCTTAGAGATAAG	0	0	0	7.32067	7.29897	7.24906	0	0	0	0	0	0	0	0	0	0	0	0	0	0	0	0	0	0	0	0	0	0	0	0
105142_bclustnum_5_kamer_1_number_1	AAGATGATAAGCTTACATGTACAGATAAGAGTTAAGGTATGGAGTATGATTCGTCAGAGTGGATTTCTTATCCTATCTTAAAAGATAAGCCTG	0	0	0	8.62752	8.64414	8.61099	0	0	0	0	0	0	0	0	0	0	0	0	0	0	0	0	0	0	0	0	0	0	0	0
105164_bclustnum_82_kamer_1_number_1	TTTGGACGCGAAAATTAGGGCACAATCGATAGATAGGTTAAAGTAGACTTTGTCAACCAAAGGTCGAACATTTTATTTC	0	0	0	0	0	0	0	0	0	0	0	0	0	0	0	0	0	0	0	0	0	0	0	0	0	0	0	6.43695	6.53995	6.55855
105244_bclustnum_88_kamer_1_number_1	GATGGCCTTTGCCATTGATGTCAAAGGGGGAGAGATAATCACATTGACTATT	3.63759	4.09434	4.20469	2.70805	2.94444	2.99573	4.93806	4.60016	4.61512	4.42485	4.96284	4.74927	3.13549	2.8622	2.74084	6.48586	6.2725	6.23872	5.115	5.18739	5.24965	6.70906	6.73126	6.68085	0	0	0	3.58352	3.51155	3.61092
10535_bclustnum_358_kamer_1_number_1	AATTATGGCAGAGGTTGTGGAGACTGCATGTTACTTAGTTAACAGATCACCTTCATCGGCGTTGGAGGATAAGAGATCGGAAGAGTCATGATCAGTCGTGTTGGCTTAGCACAAGAATTAT	0	0	0	0	0	0	4.41193	4.21582	4.15665	6.76401	6.92116	7.0076	0	0	0	0	1.09861	0	4.64026	4.84644	4.15366	0	1.09861	1.43508	0	0	0	0	0	0
10536_bclustnum_3580_kamer_1_number_1	GTTCTAAGATGATATGAGGAAGTTTGATGGCAAGGACCCAATCACATGGATACTTCAGATGGAGCAATTCTTTGATCTCCATAAT	0	0	0	1.09861	0	1.09861	7.35516	7.30115	7.3908	4.61512	4.40367	4.14313	3.18842	2.97041	2.78809	7.68098	7.8341	7.79863	7.37916	7.40595	7.4055	8.39734	8.43939	8.4771	0	0	1.09861	2.07944	2.25129	2.90417
10536_bclustnum_43_kamer_1_number_1	TACCTCATTTTGAGTCATACTACGAGTTCTAGGTCCTAAAGTGGATGTGTTAGGATCACTATCTAACCCATTATCATTAGATGAACCCAAGTACACCATGTAAGACTAATTTTACTCAAAGAACAATTTCAGCCAATGCATCATCAACCATGAAGGCATTGACCTTCCACTCATGACGAAGTTGATAACACCTATGCA	0	0	0	3.04452	2.9139	2.64921	1.48808	1.09861	1.09861	6.30782	6.72964	6.71071	0	0	0	0	1.09861	0	1.34993	0	0	0	0	0	0	0	0	0	0	0
10536_bclustnum_5089_kamer_1_number_1	ATGACTTTTGGCCCTTCATCTCCTAGGGTTAGGTTTTTGGATGTCTAGGANTNNN	0	0	0	0	0	0	7.36391	7.33694	7.44483	0	0	0	0	0	0	0	0	0	7.64671	7.6485	7.75276	0	0	0	1.09861	0	0	0	0	0
105422_bclustnum_15_kamer_1_number_1	CTCTCTGTGGGTGCGATGGTCGGGAATGGACAAAATGCGAGGTGGAAGATCATGGAATCTTCCA	0	0	0	0	0	0	2.99573	2.80336	2.35138	0	0	0	0	0	0	0	0	0	7.84893	7.69652	7.68846	0	0	0	0	0	0	0	0	0
105422_bclustnum_34_kamer_1_number_1	GACCAATATGGAATCAACTGATTTACCCAATACCTGACACAAAATGCGAGGTGGTGTCATGTTCAAGAGCGACTTCTACCCAGACTACATTCACTTTTTCTTAGATCGAAGAGCCA	0	0	0	0	1.09861	0	6.63988	7.06817	7.08381	3.85015	2.94444	3.21888	0	0	0	0	0	1.09861	2.56495	2.3979	2.3979	0	1.09861	1.09861	0	1.09861	0	4.09888	3.93964	3.93183
105446_bclustnum_69_kamer_1_number_1	TCTTTGGGCGCACATGAGAAGGGCTCCCAGGGCGAGCTCAAAACGTTACGCCGTGACCAATTATTGTTCCTGTACGCCCTTAGCATGCTGACATCAGCAAAACAAACTACCCAGTCAGCCAACCCTGCAAAATTTAGTTGTTGATCCA	0	0	0	0	0	0	0	1.09861	0	0	0	0	7.20471	7.16065	7.20897	0	0	0	0	0	0	0	0	0	0	0	0	0	0	0
10547_bclustnum_10_kamer_1_number_1	NATTGTGGAATTATGTTTCTGGTATGGTTATATGTTACAGATGTTGTACTTGATGGAAACACACATGGCATGGATCTCAATATGATTA	0	0	0	0	0	0	6.07993	6.14042	6.15804	0	0	0	0	0	0	0	0	0	8.2542	8.19671	8.20611	0	0	0	0	0	0	0	0	0
105503_bclustnum_78_kamer_11_number_9	CATTTGTCCACTTCAAGATCAAAAGCAGCAATAGATAAAAAAAATCTAATAGAAGTTAACTTAGCAACAGGAGAAAAAA	0	0	0	1.60944	1.09861	1.29928	2.13163	2.91777	2.35138	0	1.09861	1.09861	2.27727	1.09861	1.5506	6.50054	6.45087	6.51471	2.50553	2.48491	3.30505	6.6733	6.70012	6.60597	0	0	0	1.60944	1.09861	2.52573
105513_bclustnum_17_kamer_1_number_1	AAGGGTCATCTAACCCCTTCGAAACCCTTTCCCATCGGGGAGGCATATCTAGTCCCTTTGAAATCA	0	0	0	0	0	0	0	0	0	0	0	0	0	0	0	0	0	0	0	0	0	0	0	0	0	0	0	6.39303	6.40523	6.53282
105542_bclustnum_38_kamer_1_number_1	ATGAGAACAAAGTTGATACAAGAAATGTTTCCTAATGGCGAAAAGATAGTAGAGGAAACTCATGATGAGAAAAAAATAAATGTTAATCGTGATTTCTAAACTT	0	0	0	0	0	0	6.49798	6.46209	6.42552	7.77427	8.02447	7.97673	0	0	0	0	0	0	6.30955	6.40125	6.25421	0	0	0	0	0	0	0	0	0
105542_bclustnum_7_kamer_1_number_1	GTAAAACATGAAGAATGCTCTAAAAGCAGACATGGAAGGTTTGACAAAGTTGATACAAAAAAGGTTTCCTAATGGCGAAAATATAGTAAAGGAAACTCATGATGAGCACAAAATAAAGTTAAT	0	0	0	1.09861	0	0	7.34289	7.34159	7.3845	4.66029	4.86625	4.81624	0	0	0	0	0	0	6.97307	7.07257	6.94022	0	0	0	0	0	0	0	0	0
105542_bclustnum_89_kamer_1_number_1	ATGATCAAAAGTAGACATCGAAGGTTTGGAAAAGTTGATACAATAAATGTTTCCTAATGGCGAAAATATAGTAGAGGAAACTCATGACGAGAACAAAATAAAT	0	0	0	0	0	0	4.08504	3.9405	4.19134	6.56752	6.75833	6.76642	0	0	0	0	0	0	3.60489	4.14666	3.7612	0	0	0	0	0	0	0	0	0
10559_bclustnum_6069_kamer_1_number_1	GCAGAAGCATGAAAAAAACGTTGATGGAAAAGGGAAGAAGCATGCTCAGTGGTACTAGATCGGCAGCGAGTCGTGTAAGGAGATGAATCATTCCTTTTTTGAGAGAGAGGGCATATGTCATTTGATCAAAGGAGAGAG	0	1.60944	0	0	0	0	2.94444	3.7297	2.94444	6.10256	6.79868	6.80202	0	0	0	1.09861	0	0	4.36522	4.08317	4.12713	1.09861	0	1.09861	0	0	0	0	0	1.09861
105634_bclustnum_117_kamer_23_number_2	ATTGATGAAATAAAAAGGAATAACTAAGAGGGGAGAGGTGAATCAGCTACCACTAAAATAAATCCCAAATCCCTTAGATGCCAAC	6.54894	6.49828	6.42406	0	0	1.09861	0	0	0	0	0	0	0	0	0	0	0	0	0	0	0	0	0	0	0	0	1.60944	0	0	0
105639_bclustnum_85_kamer_1_number_1	TGATGGACTGCAAGTCCATGCCTACTCCTATGGTAGCAAATCTGAAGCTATTAAATGAAACTTCGTCAGATCGAGTAGATTCAACAATCTACCGGCGATGAT	0	0	0	0	0	0	0	0	0	0	0	0	0	0	0	0	0	0	0	0	0	0	0	0	0	0	0	6.66262	6.73269	6.63016
105649_bclustnum_241_kamer_1_number_1	GTGAAAGCCTCGGTCAATAGAACAATGTAGGTAAGGGAAGTCGGCAAAACGGATCCGTAACTTC	4.70653	4.65078	4.79026	5.67218	5.83676	5.67103	5.94977	5.97126	5.89807	6.61428	7.23802	7.27771	6.70073	6.65372	6.68169	6.71861	6.08298	6.15273	6.76157	6.59715	6.43722	6.8083	6.71579	6.7803	7.16214	7.31986	7.07638	6.0845	5.97551	6.08146
105670_bclustnum_262_kamer_1_number_1	TTTGGAATGCACACCTCTCCAGTAGGAGGGCACTCGGGAGTTTTGAAAACCTACCATTCAGTCAAGAAGGATTTTTTTTCGATGGCCTTACTTGTACTGTTCATAGGTTTGGGGCAGAATGATGGGGTTGCCAACACAATAAAGGGGAAAGCGATGTCATGATGATGG	0	0	0	0	0	0	1.23676	1.5506	1.55814	0	0	0	0	0	0	5.61084	5.97454	6.16782	0	1.60944	1.09861	6.50856	6.46548	6.42185	0	0	0	0	0	0
105671_bclustnum_151_kamer_9_number_2	TCTAACAGATGTTGGAGCAATGGAAAGTAAATTCAATGGTAAATGCTACAATTGCAATCAGCATGGTCACAAAGCCA	7.07339	6.99091	6.9938	0	0	0	0	0	0	0	0	0	0	0	0	0	0	0	0	0	0	0	0	0	0	0	0	0	0	0
105684_bclustnum_22_kamer_1_number_1	CCTCATTCACCTGCGCGGCGCATATAACAGTCTACACGCTCAATAGAGTTCAAATCAAGAAAGGTACTAATGCAACACCTTTTAAACTATGGTATGGTCACTCACCTAATGTTAAT	6.54391	6.35923	6.46994	0	0	0	2.19722	2.0149	1.79176	0	0	0	0	0	0	0	0	0	1.94591	1.60944	1.60944	0	0	0	0	0	0	0	0	0
10568_bclustnum_325_kamer_1_number_1	CTCTAAAATGAAAAGGGCCGAGTTTTCTTTGTCGTTAGACTCGTTACAATCACTAAAAAGCTATTGAAAATTATAGCCGTTGCTACCAAAACCGCCATTCCAGT	0	0	0	0	0	0	6.34488	6.52601	6.41455	0	0	0	0	1.09861	0	0	0	0	2.65324	2.8792	2.65324	0	0	0	0	0	0	0	0	0
1056_bclustnum_3000_kamer_1_number_1	TCGGAGGTAGAGAGGGAGACATAAAGATGGAGGTGGGAGAGGGGGGGAGGGGTGAGAGACAT	1.09861	0	0	0	0	0	3.02529	3.20275	2.90142	5.41965	6.67245	6.68669	0	0	0	0	0	0	2.05412	1.8718	2.3979	0	0	0	0	0	0	1.09861	0	0
105729_bclustnum_135_kamer_1_number_1	GATAGAAGATGACAAGAGAAACATTGCAAATAGACTGGAGGCAAAGTCAATAGAGTTTGAAAGAATCTCAAACATGCAGCTTGACATCTTAAACTAGATAATGAATGCTCATCATGAGTTGAATATGAGGACA	7.47338	7.46873	7.47425	0	0	0	0	0	0	0	0	0	0	0	0	0	0	0	0	0	0	0	0	0	0	0	0	0	0	0
105733_bclustnum_539_kamer_1_number_1	ATAAGTTGATGCTTTTCAAACTTTCAAGAATTTTCATGTATGGATTGAAAATGATGCACAAACACATATTGGCTCTCTACGCACTGATAATGGAAAAGAATACAACTCAAATG	0	0	0	0	0	0	6.84365	6.90839	6.86133	5.6128	5.62467	5.66454	2.45674	1.7346	1.84583	1.09861	1.09861	1.09861	6.65474	6.83097	6.86779	0	0	1.09861	0	0	0	0	0	0
105746_bclustnum_176_kamer_1_number_1	AAAATACTTCACCAATGCTAAAAGCAAGTCTATTATTCCAGAAGTATGAGATAAAGTCACTCCTCGAAACATTTTGTCAA	6.53685	6.51603	6.4374	0	0	0	0	0	0	0	0	0	0	0	0	0	0	0	0	0	0	0	0	0	0	0	0	0	0	0
105770_bclustnum_118_kamer_1_number_1	TCTCCTTTATTCACTGCCTTTTGTACACACTGTAGATACATCATATTTAGCTCATCAATAACATATTATATCAAGCACAA	0	0	0	1.09861	0	0	0	0	0	5.92359	6.95678	6.95105	0	0	0	0	0	0	0	0	0	0	0	0	0	0	0	0	0	0
10577_bclustnum_946_kamer_1_number_1	GCAGATACCTTTTGTGCAGTGGCCATTCCCAACAAATGACCACCACAGGCGCCACTATGACAATCATTGAGA	0	0	0	0	0	0	5.41413	5.32409	5.40817	6.63638	7.06978	7.09128	0	0	0	0	0	0	5.16985	5.22873	5.0703	0	0	0	0	0	0	0	0	0
105795_bclustnum_48_kamer_6_number_2	CATAGACAATTTAATTGCAATGGAAATCTTAAAAAATACCATTCTACTTACCAGGAGGAATTATTAG	0	0	0	0	0	0	0	0	0	1.09861	0	0	0	0	0	0	0	0	0	0	0	0	0	0	0	0	0	6.95505	6.89119	6.90475
10579_bclustnum_661_kamer_1_number_1	AGTTACCATTCGCTATTGTGGCCAGTGGTTGAGCTACCCTCCATCAACATGCTCCAAGGGGAGGGATTCCATAAACATGTCTTTGTGCAAATAGCTCAAGGGATTAGTTCAACCAATTGTCAGCAATCTCCCCTTTTGGCAATGATGGCAACAAAATAGGGAAAATTGGCTAAGTGACAAAACT	6.86111	6.83168	6.74935	0	0	0	1.09861	0	0	0	1.09861	1.09861	0	1.09861	0	0	0	0	0	0	0	0	1.09861	1.09861	0	0	0	1.09861	0	0
10582_bclustnum_2382_kamer_1_number_1	GTTACTGAATCTTGAAGCAATTTTCCAAACATGACAACCACTCTAATGCAAAAAGCAATGTTCGCATTGGCAAACCCTAGCTTGTATGCAAACC	0	0	0	0	0	0	0	0	0	0	0	0	0	0	0	0	0	0	0	0	0	0	0	0	0	0	0	6.70991	6.61807	5.8128
105834_bclustnum_14_kamer_1_number_1	TCTAAACTTTATGTGCAGAATGTAAGATTAAGAGGGAAGACAAACAATGCATTTATCATATTCTTTCCGAACTTGGACCTGCATATTTTGTTTTTGT	0	0	0	0	0	0	0	0	0	0	0	0	6.94366	7.08683	6.96109	0	0	0	0	0	0	0	0	0	0	0	0	0	0	0
105834_bclustnum_74_kamer_1_number_1	ATCTTACATCCCATACTGAACTATAGACATCATTGCTCTAATGGAAGTGTACTTG	0	0	0	0	0	0	0	0	0	0	0	0	0	0	0	1.60944	0	0	0	1.09861	1.09861	0	1.09861	0	0	0	0	6.39693	6.75693	6.33387
105909_bclustnum_107_kamer_6_number_2	AGAGGACTACTACAAGACCAAATATCAGATATTGAGGATCTGAAATGACAAGATACCCAGATTCAATATCGAGCTCC	0	0	0	0	0	0	2.74544	2.52573	2.68882	5.77233	6.81861	6.73663	0	0	0	0	0	0	2.52	2.78148	3.08453	1.09861	0	0	0	0	0	0	0	0
10598_bclustnum_518_kamer_8_number_7	TGGGGATTTGGAGGAAGAAATTTATATGCAGCAGCCACAAGGGTATGAGGTCAAAAGAANNNN	2.19722	1.09861	1.09861	3.06339	3.29584	3.58906	4.70048	4.52901	4.50719	1.46634	2.63906	2.73437	6.93408	6.87454	6.83411	4.96517	4.47354	4.66971	4.85203	4.98588	4.60183	5.65599	5.57721	5.50126	0	1.09861	0	7.11043	7.12635	7.11287
106033_bclustnum_48_kamer_1_number_1	TTGGAAATTCCAATTTGTACCTGGAATCTGCAAAGAGTGATTTCACTTAGCCACCCTCGTAACATTACCGTGTTTGGAAA	0	0	0	1.09861	0	0	6.51915	6.53524	6.60293	0	0	0	0	0	0	0	0	0	0	0	0	0	0	0	0	0	0	0	0	0
106038_bclustnum_35_kamer_1_number_1	CCCGGGCGGACCTCGGGTGCGATCTTGGGTGCGCTCTCGAGTGCGATGTCGAGTG	2.0149	1.09861	2.0149	0	0	0	0	0	0	0	0	0	0	0	0	0	0	0	0	0	0	0	0	0	8.01889	8.35529	8.00936	0	0	0
106055_bclustnum_49_kamer_1_number_1	TTCACTTTCCATACTAGTTTGTGTGTAACTTTTGGAGATAGTACTGAGCACTTGTGAGGAGTATTGTACTATGATTGTTACATGTTCTCTAGTCGGAA	0	0	0	0	0	0	6.67582	6.62804	6.58721	5.77006	6.40486	6.42846	0	0	0	0	0	0	5.85865	6.05971	5.9135	0	0	0	0	0	0	0	0	0
106094_bclustnum_59_kamer_1_number_1	ACACTACACCCTTTCAATCAAGGACCAAAGAGTATGATTCTCCAAAAGTTGGTTGACCCCT	7.02569	7.02405	7.01766	0	0	0	0	0	0	0	0	0	0	0	0	0	0	0	0	0	0	0	0	0	0	0	0	0	0	0
106206_bclustnum_118_kamer_1_number_1	GATCTTGTGAATGTTGTGTTCACTGCATCGCGATTAGTAGGGCAGCCGACACGGCTTCCTAAGGATAAAGGCTTTGTTCCTATAGGTTACAGAAGATTAATGCTCTATCCACTACAGAGGCAGAGTATGTTG	5.55373	5.40845	5.5444	0	0	1.09861	7.44161	7.32581	7.42297	0	0	1.09861	0	0	0	0	0	0	7.06583	7.24011	7.17242	0	0	1.09861	0	0	0	1.09861	0	0
106218_bclustnum_208_kamer_1_number_1	ATAAAAAGATTCATGCAGCATTGTGGCATATGGGAAACATCAAATTTAGCAACAGGATGCTCCCGA	0	0	0	6.69964	6.70482	6.66058	0	0	0	0	0	0	0	0	0	0	0	0	0	0	0	0	0	0	0	0	0	0	0	0
106300_bclustnum_369_kamer_34_number_2	AAACTATTGAATGAACACATAGCGTTAATCATCACTTCCGGGGCTTGCAGTCGGT	0	0	0	0	0	0	6.20939	6.2102	6.16331	5.20949	5.59024	5.49141	2.25129	2.05412	1.94591	4.03601	3.64284	4.1239	6.50817	6.54736	6.44921	4.27944	4.52396	4.48864	0	0	0	1.09861	1.09861	0
106367_bclustnum_82_kamer_1_number_1	GAATCAATCAACAAAGTTCTAGTCGTCATGATTCAACGGATCATTGGTATCCATCGAACAAATTGGCATAACATGTTATTTTCGGCGCTATGGCAATATCGAACTTCAGTGAACATTC	0	0	0	1.09861	0	0	6.48741	6.47599	6.44961	0	0	0	0	0	0	0	0	0	6.62768	6.46869	6.41212	0	0	0	0	0	0	0	0	1.82455
106406_bclustnum_121_kamer_1_number_1	ATCCATTTATTTCCTACCAACAACATGTCATCAACATAAAACACTACATAAATGAAGTGATTACCAACCTGCTTGGAATATACCCGTGTCTATAGGCATGCATAATTTAAAGCCGTCAAATCGACGTCCACCAAATTCACTTATCCATCGT	0	0	0	1.09861	0	0	1.09861	1.09861	1.09861	0	0	0	1.09861	1.09861	1.32176	7.18558	6.83303	6.86543	0	0	0	7.51385	7.48913	7.45385	0	0	0	1.84583	1.82455	1.7346
106427_bclustnum_124_kamer_1_number_1	AAGCCAAAAAGGCACGGGGAAGTGGTGTGAGTTCCATAAGAGCTCCACCCACAACACAAGTGAGT	0	0	0	0	0	0	6.00553	6.13556	6.15273	6.18002	6.39804	6.46977	2.15948	2.8094	2.53898	6.01534	5.80614	5.84932	7.00246	6.95876	6.95113	6.39359	6.33859	6.39637	0	0	0	2.30259	1.50408	0
106448_bclustnum_129_kamer_1_number_1	ACATGGTGTGACGGGAGACGGGGGATTAGGGGTCGATTCCGGAGGGGGCGCCTGAGAAACGGCTACCACACCCAAGGAAGGCAGCAGGCGCGCACAC	3.88271	4.1325	3.97029	4.88196	4.54211	4.95661	4.66658	4.78099	4.80493	5.50307	6.57848	6.48192	5.86268	5.87274	5.90051	5.24644	5.10863	5.23585	5.44049	5.40418	5.3799	6.02988	5.87337	5.92039	5.66796	5.8538	5.6478	5.32841	5.22395	5.15842
106456_bclustnum_94_kamer_1_number_1	AGAACCCAGTGATGCATACCAAAACAAAGCACATTGCTATAAAATATCACTTCTTAAGAGAATTGGTGCGGGATAAAGAAGTCAAGTTGGATTGGAATATTAAATAAAAAGAACAGATTGCAG	7.16227	7.21622	7.25712	1.09861	0	0	0	0	0	0	1.52606	1.09861	0	1.09861	1.09861	0	0	0	0	0	0	0	0	1.60944	0	0	0	0	0	0
10662_bclustnum_1853_kamer_1_number_1	GCTTAATGCCTTGGAATGTGTGCACTGGGGGTACGCACCTTATGTAAGGTGTACCTGCGTGCACGCACC	0	0	0	0	0	0	6.13412	6.19644	5.98322	0	0	0	0	0	0	0	0	0	7.17877	7.11279	7.13306	0	0	0	0	1.09861	0	0	0	0
106702_bclustnum_35_kamer_1_number_1	GACATCAATGAAAAATATAGTCATGAATGTAACATATCATCATGATAATGATCGAATGACTTACCAAATAGAAGTATCATTTACTGTAACTGCGCATAAATCTTTAGATCTTTCTTTCAAAATTTTTA	6.50529	6.53669	6.53717	0	0	0	1.09861	0	1.09861	0	0	1.09861	0	0	0	0	0	0	0	0	0	0	0	0	1.09861	0	0	0	0	0
106735_bclustnum_56_kamer_1_number_1	ACAATGGTTTATCAAGGTGGGTTTTTCAAACGTTTTCCGTTAATTGACGGAAAATTTT	1.09861	0	1.09861	0	0	0	0	1.27297	0	0	0	0	0	1.09861	1.54045	0	1.09861	0	0	0	0	1.50408	0	0	0	0	1.60944	6.48158	6.50678	6.49409
106764_bclustnum_88_kamer_1_number_1	AGTGTCAAAATACAGTGTAATAACATATATAAATAATGTTATTCCATAGTT	0	0	0	0	0	0	0	0	0	0	0	0	0	1.09861	0	0	0	0	0	0	0	0	0	0	0	0	0	7.25064	7.20385	7.15914
106776_bclustnum_205_kamer_1_number_1	TAGGTTTCGTTGCTGCCATCTCAAAAACATTTGGACTGCTCCGCTTCCTCCTGAGACTGAGGTTTCTCGCCAAATGACGACTTCTACCACATCTATTGACATTATGGGTCTGCAAGCTGCTTATGCTAATTTGCA	0	0	0	0	0	0	0	0	0	0	0	0	0	0	0	0	0	0	0	0	0	7.63266	7.57554	7.36464	0	0	0	0	0	0
10679_bclustnum_207_kamer_2_number_2	GTCATTTGGAAACAAACCAGAACTAACTTTCCAGAGAAGGAAGGTTAGGCTA	0	0	0	1.09861	0	0	7.52153	7.5198	7.5338	0	0	0	0	0	0	0	0	0	7.97639	7.96116	7.98009	0	0	0	1.09861	0	0	0	0	0
106846_bclustnum_94_kamer_1_number_1	ATTGGATACCAATGTTGTGTTGGATTGGATCTCTGATATGGAGAAATTCTTTGAGTATGAAAACCTCCTATAGTAGAAAGGTGGATATTGTAGTCACTAGGCTAAAAGGTCATGCATCACTATGGTGGGAACACTTGTAAACTGATAGAAAAAGGAGAGGAAAGGGGAAGAT	6.55197	6.57333	6.56421	0	0	0	1.09861	1.09861	0	0	0	0	0	0	0	1.09861	0	0	1.09861	0	0	1.60944	1.60944	2.48491	0	0	0	0	0	0
1068_bclustnum_104_kamer_1_number_1	CCACATAGCTGGGGGAGCGGATTGGAGAGACGGAGAGCTCGCGGGGAGGTCTGAAATCATTTGCAGTGCGACCCGGTGACCCGGCAGCACTTGGGCAGTTTTATGCAG	0	0	0	0	0	0	0	0	0	5.82008	6.92815	6.92599	0	0	0	0	0	0	0	0	0	0	0	0	0	0	0	0	0	0
106911_bclustnum_240_kamer_1_number_1	TCCGAACTCAAAGGACAAAGCCAAGGCGGGCTGACCCAAGACAACCCGCCAATCCCTCAACCAATCACAACATGCCACATAGGAATTATTTGTAGAAGGTGGGGTC	0	0	0	2.95936	2.6288	2.73003	6.73085	6.70354	6.75177	2.3979	2.94444	3.62878	2.3979	1.5506	2.3979	0	0	0	7.52685	7.38337	7.36439	1.09861	2.56495	1.94591	0	0	0	0	0	0
106946_bclustnum_55_kamer_1_number_1	GATCATTCAGCTGCTAAACTGAGCTTCTGCGCTGTATTGCAACTGTCCCACTCTGTACCTGCGCT	0	0	0	0	0	0	6.41728	6.46355	6.52698	0	0	0	0	0	0	0	0	0	0	0	0	0	0	0	0	0	0	0	0	0
10694_bclustnum_1043_kamer_1_number_1	AATCAATGGTTTCTACCATTTTAGACTTCAACACATGTAATCACATGGTCAGATTCGTACTTTGGGTAACGGGATTGAAGACCCTAGATAT	0	0	0	0	0	0	0	0	0	0	1.79176	2.03688	0	1.09861	0	6.87856	6.61279	6.63871	0	1.09861	1.09861	6.79583	6.79484	6.86728	0	0	0	0	0	0
106_bclustnum_0_kamer_1_number_1	AAACTTTTTTTCTGATAAGCTGGTTCTCACTTCTGTTACTCCAGCTTCTTCGGCACCTGTTTTACAGACACCTAAAGCTACATCGTCAACGTTATATTTTGATAGTTTACGGTTATG	0	0	0	0	0	0	0	0	0	0	0	0	0	0	0	0	0	0	0	0	0	6.62262	6.52649	6.28396	0	0	0	0	0	0
106_bclustnum_1_kamer_1_number_1	GTTTCAGACTTTTATTTCTCGCCATAATTCAAACTTTTTTTCTGATAAGCTGGTTCTCACTTCTGTTACTCCAGCTTCTTCGGCACCTGTTTTACAGACACCTAAAGCACATCGC	0	0	0	0	0	0	0	0	0	0	0	0	0	0	0	0	0	0	0	0	0	7.09197	7.03021	6.78989	0	0	0	0	0	0
107011_bclustnum_187_kamer_1_number_1	TATGAGAGTAGACAAAATGCAAATGTTACTAGGGAAAACAACAGCCAAAATAATGTGTTGTTAGCATGTAACATGGCTGAAACACATAGTGAAGACATATGGTTCTTAGACTCAGGTTGCAGC	0	0	0	0	0	0	5.36364	5.41239	5.3959	1.5506	1.90954	1.60944	1.50408	1.60944	1.09861	0	0	0	6.59555	6.4708	6.57879	0	0	0	0	0	0	0	0	0
107016_bclustnum_271_kamer_1_number_1	TTCAATTTAGCTATCGGGAGAACGAAGGCAAGGAGACTCCAAATTCGTGAATGGAAAAATCACGAAAAGATCATAGTCATTGATCGAATGAGGTATTTGTGTTTTACAGGTTAAAATATCACAACAAACATCGGGGGATTGGAGACCAACGCATTGGAATTTTAGA	0	0	0	6.60476	6.71296	6.72156	0	0	0	0	0	0	0	0	0	2.06546	2.03688	1.88707	0	0	0	1.60944	2.24543	2.14658	0	0	0	0	0	0
10701_bclustnum_4067_kamer_1_number_1	TCTTTGATTGTGGTTTCCATATGGTGCTAGATTATCATGTCTTAGCATATTGAGAGTAACATTAAGAATTCGTGTATCTAGTCCTTTTTTAAACTTTCCATTTTATGCTTCTTTTTCTTTT	6.56315	6.53922	6.55465	0	0	0	0	0	0	0	0	0	0	0	0	0	0	0	0	0	0	0	0	0	0	0	0	3.69718	3.44468	3.7612
107025_bclustnum_176_kamer_1_number_1	AGAATGCACGAGCAGGTTGGATGATCAGGATGGATGTGAACCGTCGAATGAGAACAGATCTACGGTGTGGGATGCAAAGGAACAACTTTCTTGACTTCCAAGATGGTGGTAGTTCTTCAAACCCTCCTGGGCAAAGGACCAATTGTTGGGTTGTGTTATATTCTTTCGATGACTAGCCCACATAGTTAAT	0	0	0	0	0	1.09861	5.72218	5.78996	5.71703	1.09861	1.09861	0	0	0	0	0	0	0	6.35866	6.50718	6.23158	0	0	0	1.09861	0	0	1.09861	1.60944	1.09861
10702_bclustnum_7473_kamer_1_number_1	CTCTCCTTTTATTTCGAAAAGAAGCTTGTTTGTGTTGGTCACTTGAAAGCAAATTCAGAT	1.09861	0	0	0	0	0	6.83384	6.83653	6.90174	0	0	0	0	0	0	0	0	0	0	2.3979	2.56495	0	0	0	0	0	0	0	0	0
10705_bclustnum_1297_kamer_1_number_1	CTCATGGCTACAAGTTGTTGTGCCGAGGCGCTCTCTACACCCAGTTGAGGGAAA	1.09861	0	1.09861	0	0	0	1.09861	1.46634	1.76766	9.07364	0	0	1.60944	0	0	0	0	0	2.5819	1.81916	2.4375	0	0	1.09861	0	1.60944	0	0	0	0
107185_bclustnum_18_kamer_9_number_2	ATTACACTTTTCCCTACACGACGCTCTTCCGACGTTATTTGCTCGGTAGGGG	0	0	0	0	0	0	0	0	0	9.37902	0	0	0	0	0	0	0	0	0	0	0	0	0	0	1.09861	1.60944	0	0	0	0
107214_bclustnum_160_kamer_1_number_1	TGGGAAGCATAATTCCTGGAATATCATAAACTTTTTTGGGAAATCCAGGCTTAAGTACAACTGAGTTAAATGTTGAGATTCAACAAGATGATGAGCTTAATGAAAAGAGTCGCCTTCACTAAGTGGAGATCGGAAGAGCGTCG	0	0	0	1.09861	0	0	7.32877	7.32334	7.63224	6.69504	6.94304	6.80628	0	0	0	0	0	0	7.8323	7.83862	7.84121	1.09861	0	0	0	1.09861	0	0	0	0
107235_bclustnum_29_kamer_1_number_1	CTTCTAGCATATATATCTCTAGAGACTTATTGTTCTATTGAGTTTTCTTATACTTCCTTGTTGAAGTTTAGGGCATTCTTCTAG	0	0	0	0	0	0	0	0	0	0	0	0	0	0	0	0	0	0	0	0	0	0	0	0	0	0	0	6.46459	6.51397	6.45087
107237_bclustnum_140_kamer_1_number_1	CTACATTGCTATACAAATGCAAAGTAGATCAAAGCTGCTTTAGTCTATCTCTAGTCTAGTTTTAAGTGTTGAACAACTGTCTCAAATATTTGGTTAGTTCCTTGTTTCAATATATCTACA	0	0	0	0	0	0	3.34831	3.11149	3.14337	2.5123	3.16407	2.83321	0	0	0	0	0	0	6.5551	6.42869	6.57685	0	0	0	0	0	0	0	0	0
10727_bclustnum_1706_kamer_1_number_1	AGAAATATTTTGGTGGTGATGTCTTCTTAGGGTATGATAGGAAGTCCAAAATTGTCGGACGTGGAAAATTCAAGCTGAAGCTGTAAGGTGGAGGATTA	0	0	0	1.09861	0	0	5.88703	5.92988	5.84612	3.94481	4.29955	4.16408	0	0	0	0	0	0	7.04684	7.01561	6.97718	0	0	0	0	0	0	0	0	0
10727_bclustnum_894_kamer_1_number_1	AGTTGAGAGTATGATGTTGGTGATGTCTTCCTAGGGGATGATAGGAAGGCCATAATTGT	0	0	0	0	0	0	0	0	0	6.20537	6.68486	6.67683	0	0	0	0	0	0	0	1.09861	0	0	0	0	0	0	0	1.60944	1.5506	0
10728_bclustnum_153_kamer_1_number_1	ACTAGCGGATTTTGTGCCGCGGGGGGGTGATCGTGGTGATATCCGAGTCCGTAGGAGGCCACTTCCAGGCCGACATGACGACCAAGAAATTTTTTCATTAATAATTTAAATACTCTATAGTTAATGTCG	1.09861	0	0	4.43082	6.17705	6.53233	0	0	0	0	0	0	0	1.09861	0	0	0	0	0	0	0	0	0	0	5.24175	6.50379	5.15906	2.64696	2.80672	3.03389
107346_bclustnum_28_kamer_1_number_1	AATCAAGTTGAAGCCCATGCACTTCTTTAGGGCTTACTCATAGCATTCAAATCCGGAATCAAGAATTTGATGAAAAAGATGGTACCCCAAAAGAGGAATTACATAACAAATTTTAGAGAGATATGACGGTAAAAATATCCCTCTTTGAAAACACATGCCAAAGACAATCCAATTTAAT	6.58801	6.59015	6.61755	0	1.94591	1.09861	0	0	0	0	0	0	0	0	0	1.43508	1.90424	0	1.09861	0	0	0	1.09861	1.09861	0	0	0	0	0	0
10734_bclustnum_812_kamer_1_number_1	TATACAGTATATCAATGCATAGGGATCACAAGAATCAAAAGATGAGAACAAGAGACACAGAGTTTCTGTGGGGAAAA	0	0	0	0	0	0	0	0	0	0	0	0	6.65838	6.76306	6.7511	0	0	0	0	0	0	0	0	0	0	0	0	0	0	0
107382_bclustnum_39_kamer_1_number_1	CAGTCAGTATACACAATAGCAGCATAATCTGCAATACAAGTATCCTCATCAATACACATTATCCTTCCTTTTGGA	0	0	0	0	0	0	0	0	0	0	0	0	7.63595	7.84534	7.84299	0	0	0	0	0	0	0	0	0	0	0	0	0	0	0
1073_bclustnum_416_kamer_12_number_2	CTGTCAACACCAACAAGTTTCAAAAGGGCATTAGTATCTTGACTCTCATTCATTCACACTTGTCAGATTGTACTGGGGCACCTTGACACTCATTATCCTTATCGGTGGGTTGTCTCCCGTTGGTTTACGAGAA	0	0	0	0	0	0	1.50408	0	1.60944	6.03069	6.6639	6.79883	0	0	0	0	0	0	1.60944	1.76766	1.83258	1.50408	1.09861	1.54045	0	0	0	0	0	0
107402_bclustnum_129_kamer_1_number_1	ATTCTTTCTCAAGTTCAGCCTCTGATTTACAATGAGAACCATGGGATAAATAGGCTTGAGGAAGGAAAACCTCATGGAGCGACTAGCTATCCCATTGGCCAAGTCAAAATATCTAAACTTGTCCTTGAGGCTTTGCAAAGCCCAAGG	0	0	0	0	0	0	0	0	0	6.73187	6.51302	6.53275	0	0	0	0	0	0	0	0	0	0	0	0	0	0	0	0	0	0
10740_bclustnum_2990_kamer_1_number_1	TATGCAGCCTCTTGTTATAGCATCTGTAGCCTTTGCTATTTGTAGCATATCCAAGAAAATTCCTCATCAGCCCTGTCATCATACTTACCCCGATTCTCATCATTATTCTTGATGTAACATTTGCTTCCAAAGACCTTGAAGTGCTTATTAGTGGTAGGTTTTTCAAA	2.68102	2.89037	2.19722	0	0	0	4.57176	4.10189	4.62637	1.09861	2.10413	1.09861	0	1.09861	1.09861	6.33528	6.09413	6.12249	4.67656	4.57883	4.39268	6.83397	6.8241	6.77935	0	0	0	3.95364	3.9982	3.69821
107437_bclustnum_60_kamer_1_number_1	TTCTGGCATGTGGTTTTCAAGCATAACATCCATTTGGAGAACTCTTCAAATTCAACTTCATCTTTAGGAATAACACTTCTGGCTAAAGTACCAAATGGGGAAAAAAGACCTGCGTCCAGATCGGAACTCGGGGGGGCCGG	0	0	0	0	0	1.09861	6.44049	6.38519	6.44277	2.0149	1.67398	1.94591	0	0	0	0	0	0	6.61645	6.69932	6.73289	0	0	0	0	0	0	0	0	0
107445_bclustnum_25_kamer_9_number_5	AAGGCCATGGTTGAAGAAATGGATGCCTTGGATAAGAATGAGGCATGGGATATATTGAGN	0	0	0	0	0	0	3.00568	3.02852	2.90872	2.59026	1.09861	2.43361	4.77068	4.78192	4.75072	7.13036	7.17037	7.19419	1.60944	2.3979	2.8792	7.42695	7.46298	7.5168	0	0	0	3.06339	3.30811	2.96183
107454_bclustnum_38_kamer_10_number_2	TATTGATCCTGAGAGTTTGAAGTTTAGCTTGTTTTACTTGTTCTTCTCCTTCATAGTTCG	0	0	0	0	0	0	7.55171	7.60506	7.57593	0	0	0	0	0	0	0	0	0	6.2634	6.37446	6.19577	0	0	0	0	1.09861	1.09861	0	0	0
10746_bclustnum_2155_kamer_1_number_1	GTGCTACCATTTCCTTTGTAAATTGACCGAGTCACAAGTTTTTTATGGGATCAAAGCCATCGATACCATACAAAGCATATCCTCCACATTGGGAACTCCCTAAGTTCCCAAATT	0	0	0	3.6488	3.51651	3.68888	5.62916	5.60528	5.48376	7.11477	7.32416	7.30988	0	0	0	4.20469	4.09672	4.22579	5.12396	5.3033	5.45746	6.16512	6.31432	6.31484	0	0	0	4.79854	4.87301	4.66748
10755_bclustnum_343_kamer_1_number_1	TGTAAATTCACACTAAAAAGTTTTGCTAGAAATAAAACAAGGATCTAGCTAGAGCTAAGAAGAAATCTAATGATGCACAAGTGGCTCTTTGTGCATTTTTTGTTCAATCTAA	0	0	0	0	0	0	0	0	0	0	0	0	0	0	0	0	0	0	0	0	0	0	0	0	0	0	0	6.5819	6.58868	6.56974
107586_bclustnum_160_kamer_1_number_1	TTACATCAAACGAGTTTGAGATATCCTGCAATGACAGAGGAATCAAAAGACAAACATCTAGCCCTAGAACCCCTCCACAAAATGGAATTGTTGAAAGAAGGAACATTTTGTAATGACTCTGC	6.64154	6.54439	6.52283	0	0	1.09861	1.09861	0	0	0	1.09861	0	0	0	0	1.09861	0	1.09861	0	0	0	0	0	1.335	0	0	0	0	0	0
1076_bclustnum_151_kamer_1_number_1	TGATCACAATCCATCTACCTGATGCATACAAAGTATCATACATGATCCTCCTGAGCATCAATGTATCCAC	0	0	0	0	0	0	0	0	0	0	0	0	6.56345	6.6022	6.60026	0	0	0	0	0	0	0	0	0	0	0	0	0	0	0
1076_bclustnum_595_kamer_1_number_1	AAGAGGCTCGACATTATAATCTTTCGGGGACATGTTCTTCCAATAATTAACATCACATGAAAATAAGTAAATCTATTAAGGCCAGTAGTAAGGTATAACCTAACAGATCGG	1.09861	0	0	0	0	0	0	0	0	0	0	0	0	0	0	0	0	0	0	0	0	0	0	0	6.62936	6.54287	6.65647	0	0	0
107714_bclustnum_567_kamer_1_number_1	TAAGATCATAGTAAGGCCGATGGACAGGAGAGTAAGAAATGCAACTGTAAGGTAGTACGAGTTCTTTGCCACAATGATAGAAATGGTCACTTCATCATGGAAGACTACAAAGCAAGAAGAAACGC	0	0	0	0	0	1.09861	6.33043	6.44731	6.35437	0	0	0	0	0	0	0	0	0	7.35231	7.25996	7.27003	0	0	0	1.09861	0	0	0	0	0
107746_bclustnum_172_kamer_1_number_1	AGAGAATTGTCAAGCCTTCCTTCAAAAATCCCACATCTTTCTTCAAATCTTCAATCCAACATTAATGTTTATGAAATCATGATTAACATTTATTTTGTTCGCATCAGGAGTTTCATCTACTACCTTTTCGCCTTTAGGAAGAGTTTCTTATAGAGAA	0	0	0	0	0	0	6.87503	6.94061	6.90462	6.82566	7.11249	7.10332	0	0	0	0	0	0	6.99924	7.16038	7.01625	0	0	0	0	0	0	0	0	0
107746_bclustnum_387_kamer_1_number_1	CTTCAATCCAACATTAATGTTTATGAAATATGATTACATTTATTTTGTTCGCATCAGGAGTTTCATCTACTACC	0	0	1.09861	1.09861	2.19722	0	4.18749	4.18965	4.16111	7.38846	7.54499	7.66622	0	0	0	0	0	0	3.81928	3.91488	3.61861	0	0	0	1.09861	0	1.60944	0	0	0
107820_bclustnum_166_kamer_1_number_1	GTAGCATATGCACATGTGCCTAAAGAACAAAGGCAAAAGCTGGATGAAAAAGGTGTGAAGTGCATCTTCACACAGTATAGCTCAGAACCCGAATTTGAGTTGGTTTCTAGGTCTTCGCAATTACTCAATATTTTGTTGAAT	6.40413	6.38257	6.51434	1.94591	1.43508	1.60944	0	1.09861	0	1.09861	1.48808	1.09861	0	0	0	0	0	0	0	1.09861	0	1.09861	0	1.09861	0	0	0	0	0	0
107837_bclustnum_85_kamer_1_number_1	GTATCCCATTAATAGTTTTCAAGATCCAACCAGTCCATAATAGGCTTGGTTTCTACAGA	2.15948	2.37158	1.50408	1.60944	1.60944	1.09861	0	1.60944	0	0	0	1.09861	0	0	0	0	0	0	0	0	0	0	0	0	6.50079	5.97381	6.41255	0	0	0
107844_bclustnum_114_kamer_1_number_1	GATCTCTCAATATTGGAGTATCGGGATCTTATTCTTTTGATTCATGTTCTTCTGTAGAGTCGGCTTCGTCATCCTTTAAATCAAACTCTGTCTTCTCTAGTGCTTCATTACTTGGTAGGAATTCCTATTTAACAATGTCCTTCATTTC	0	0	0	0	0	0	1.70475	1.81529	0	0	1.09861	0	0	0	0	5.78514	5.92426	6.06578	1.60944	0	1.75786	7.04129	7.02681	7.04229	0	0	0	0	0	0
107955_bclustnum_22_kamer_1_number_1	AAAGGTTCCCAAAGCAATAAGTTTGACTAGAAGTGATAGGTTTCCTACATTGGTATTTATGACCGACCTTGCAATAGATTTTGAATATGAATGGTATATATATGTAATGTATTGTATCATTTCAGAATGAGTGTGGGTGTGGT	6.50212	6.43633	6.11419	0	0	0	0	0	0	0	0	0	0	0	0	0	0	0	0	0	0	1.09861	0	0	0	0	0	0	0	0
107988_bclustnum_257_kamer_1_number_1	ACTTTGAAATGAAGTTGGATCAACGGTCTAGACACACCTGATCTGATGGTTGCGATTAAATCACGATTTCG	0	0	1.09861	0	0	0	6.01274	6.01859	6.0098	3.23475	3.78419	3.57795	0	0	0	6.56386	6.5335	6.52239	6.32257	6.34036	6.29268	7.02019	7.03156	7.08624	0	0	0	1.09861	1.09861	0
10799_bclustnum_20_kamer_1_number_1	ACAACCGGGCCTCCATGCTCAACTAGCCACAACCCCTTTCAAGTGGGCTTGGGATTCCAGCCACTATGTCCCATTGACATAG	0	0	0	0	0	0	5.07048	5.2391	5.41165	6.1826	6.73815	6.74111	2.95751	3.02042	2.32728	6.46653	6.28879	6.12687	6.69425	6.3613	6.54463	6.27476	6.343	6.14365	0	0	0	0	2.31677	1.82455
10800_bclustnum_3525_kamer_1_number_1	TATAATATCACTTTCCATCTACTCAATGAATCTTTCAACTTGCAAAAACCTTTGTAATCTGATAGGTGTCGGCCAA	0	0	0	0	0	0	3.60187	3.30811	3.88362	8.13892	7.94586	7.9415	0	0	0	0	0	0	4.20965	4.3745	4.41401	0	0	0	0	0	0	0	0	0
108053_bclustnum_185_kamer_1_number_1	GGCACTAGGCAATGTGGCTAACTTAGTCCCAGCATAGCTCGATATGGTATTTACATACATAAATATGCATATATAGGCATAGAGAAAATTGTCTTTCATGTCATCCATCTTAGCT	0	1.09861	1.09861	0	0	0	1.27297	1.09861	1.09861	6.94601	6.30038	6.24804	1.09861	1.09861	0	0	0	0	0	1.50408	0	0	0	0	1.09861	0	1.09861	0	0	0
108073_bclustnum_36_kamer_6_number_2	GGCAAAGAAAACAATTGACTTTGAAACATTGAAAGAAGATCATGAAGAACTCCATAATACAA	6.92297	6.88823	6.92592	0	0	0	0	0	0	0	0	0	0	0	0	0	0	0	0	0	0	0	0	0	0	0	0	0	0	0
108083_bclustnum_4_kamer_1_number_1	GGTAGGTCCTAACAGGGCTCACTTCAGAAGAGTGAAAATTTGGTGACTAGTTGCTGGTGGTTTTTCCCATATTGGGTTTCCACGTAAATCTGGT	7.79934	7.79998	7.8008	1.60944	0	1.09861	0	0	0	0	0	0	1.09861	0	1.09861	1.09861	1.60944	1.09861	0	0	0	1.60944	1.8718	1.8718	0	0	0	1.09861	1.60944	1.09861
108115_bclustnum_67_kamer_1_number_1	CCAAGCTAGAAAAGTAATCATGACCAACTTTTATTAGATCAGAAAATAATAGTTGCAACTAGA	0	0	0	0	0	1.09861	5.28433	5.273	5.37064	6.27434	6.90764	6.88494	1.09861	1.50408	0	0	1.09861	0	5.37682	5.46806	5.59636	0	0	0	0	0	0	0	1.60944	1.84583
108126_bclustnum_392_kamer_1_number_1	TTTTTAAAGACATAATTGGGCGTTAAGAAAGAGAATTGACTACTAGACATTTTTTTCCTAGCATTCTTATTATAACTCTTGTTTTTAATGACTAGGTTGAACTATGTAAGG	0	0	0	0	0	0	1.09861	1.09861	0	0	0	0	0	0	0	0	0	0	0	0	0	0	0	0	0	0	0	6.75344	6.43348	6.88704
108127_bclustnum_32_kamer_1_number_1	CGGAAAAAAATCAATTGCATGCATACATTAAAACCACAAACAATCACACATATGAACACAGTATTTAATGGGAAAGCTTAAAGCTATAAACCCCAACTATC	0	0	0	0	0	0	0	0	0	6.21341	6.62353	6.60665	1.09861	1.09861	0	0	0	0	0	0	1.09861	1.09861	0	0	0	0	0	0	0	0
10817_bclustnum_996_kamer_1_number_1	CATATATTATTATGGAACTCAATGAAATACAATGAGAATGGGCCTTGCTTATATATGAAAGAATAACATCTAAGAACCAGTTAAGGTCGTAAATCAAGGAAATAACTAGTCATCAAAGAAATAGTCAAGACCATAGATTTAGGAGAG	0	0	0	6.86485	6.81203	6.84268	0	0	0	0	0	0	0	0	0	0	0	0	0	0	0	0	0	0	0	0	0	0	0	0
108215_bclustnum_78_kamer_1_number_1	TTAACCAATCATTTATTTACTAGCCTATCCTAGCCTCTGTAGCAACAACATACTCTGCTTCTGTTGTTGAAATTACAACACCTT	3.60005	3.32504	3.23475	0	0	0	6.77765	7.14071	7.17447	6.75071	6.90801	6.94216	6.65028	6.64898	6.56573	5.59842	5.65599	5.74939	7.46751	7.62738	7.6462	5.71208	5.9126	6.04816	0	0	1.60944	5.81909	5.79909	5.70156
108223_bclustnum_48_kamer_1_number_1	TTAAGTCAAAAGGATGAAAAATGTACGGAATGACTATCTATATGTTGAGACTGGCTATTGTATGTGGATGACATGTTGCTGATAGGAAACAACAATCAAAGAGGATCACTGTGTGTATTTTAAATTACTTGGTGATCATTTGATTTATTTTTTCTTGTATGCAACACTTAATATTTATCAGGT	0	0	0	0	0	0	4.41401	4.65966	4.34381	3.8373	4.55388	4.39445	1.09861	1.75786	0	6.28934	5.92595	6.13945	4.7484	4.69684	4.74319	7.33498	7.25166	7.24624	2.07944	2.42775	1.50408	1.09861	0	0
108246_bclustnum_94_kamer_1_number_1	CAAGTTTGGGAAGGAGATAAGAGCGATGTGCATACCTCCCAAGGCCTCTCACTACCATACATG	7.09183	7.13436	7.05742	0	1.09861	0	0	0	0	0	0	0	1.52606	1.94591	1.50408	0	0	0	0	1.29928	0	0	0	0	0	0	0	0	0	0
108248_bclustnum_32_kamer_1_number_1	GTCTATATTGGAACACAGTTTAGAGGTCTGTAGCCACCACATCTCTTCTGGAAGATAAGCTATCAATGCCCTGTCTATAAGCATATTCAGTAA	0	0	0	0	0	0	5.273	5.40589	5.33823	6.2349	6.31214	6.51978	2.36712	1.84583	1.60944	2.02438	1.60944	1.09861	5.5393	5.78151	5.8999	2.52	1.76766	2.22848	0	0	0	0	0	0
108248_bclustnum_91_kamer_1_number_1	TAATAAATAGGCCCTCAAGCCTCATTGTAACTCAGTTTAGAGGTCTGTAGCCTCCACATATATTCTCAGAGATAAGCTACCAGTAGATCGGAAGACGTCGT	0	0	0	0	1.09861	0	4.93926	5.0689	4.98361	6.55791	6.92535	7.05315	0	1.38629	0	1.90954	1.60944	2.50553	5.11132	5.27939	5.08296	2.11021	2.60269	2.07944	0	0	0	1.60944	1.94591	0
108283_bclustnum_135_kamer_1_number_1	CCAAGCTAAAATGTTTAACATACTTAAATACAACATCCATTTTTACTCTTGATCCACCAAGCCCCAAGAGGGATAAAATATTTTTTCACTC	0	0	0	1.09861	0	0	7.02534	7.04684	6.99281	1.09861	0	1.09861	0	0	0	0	0	0	5.84676	6.63493	6.35553	0	0	0	0	0	0	0	0	0
108296_bclustnum_13_kamer_1_number_1	AGAGCAGTTTCTTTTGGCCTTTTTCAAACTCTATAACTGAAAAAGTCCAACCGAGCATTTGTCACTTCGGGCCGTTAAACATTGAAGGCGACTAGAGTG	0	0	0	0	1.09861	0	6.49878	6.54742	6.49274	0	0	0	0	0	0	0	0	0	2.83321	2.19722	2.14658	0	0	0	0	0	0	0	0	0
108404_bclustnum_89_kamer_1_number_1	AAGTCTACATGGAACAACTAGAAGGCTTATCATTGATAGACAAAGAAGACTATGTGTGCAGACTGAATAAGGCTCTATATGGAATGAAACAGGCTCCTCATGCGTGGTACTCAAAACTGGATAATATTTCAAAAACAA	0	1.09861	1.43508	0	0	0	1.09861	0	1.09861	5.91869	6.41811	6.54059	0	0	0	0	1.09861	1.09861	1.09861	0	1.43508	0	0	0	1.94591	1.94591	1.09861	2.72275	3.23212	2.96183
108411_bclustnum_130_kamer_1_number_1	AAGGCTTACACTGTGTTAGTAGTGACCTGGTTAAAGGATTTAGAAACACTTGACTTGAAGTGCTACCCGGTTAAGGGATTTGATCACCTTATCAAAGGATCTTACAAATGGC	6.9122	6.97821	6.84268	0	0	0	0	0	0	0	0	0	0	0	0	0	0	0	0	0	0	0	0	0	0	0	0	0	0	0
108521_bclustnum_278_kamer_1_number_1	TTGAATATCTAGTGAGCATAGTTTTGCAATAATGCCTTGATGCCCCCTTTTCAATAATTTTGTCATGTCGTTAGAGCTTATCACCTTACTGAGCTTCCCTGTGATACCTCTCAACTAAATTTCTTTCCTTCC	0	0	0	0	0	0	1.09861	0	0	1.09861	0	0	0	0	0	6.08791	6.25479	6.29342	0	0	0	6.59783	6.59213	6.59715	0	0	0	0	0	0
108587_bclustnum_46_kamer_1_number_1	CTTAGCAAGCACCATAGCTCCTCTCATCATCTTACATCCATCTTTAGAAAAAACAACTTGCACGCCTACATCATTCAGCATACTTACAGATAATAGGTTTCGTGCCAACCAGG	6.49293	6.54208	6.57432	0	0	0	0	0	0	0	0	0	0	0	0	1.09861	0	0	0	0	1.09861	0	0	0	0	0	0	0	0	0
108592_bclustnum_26_kamer_1_number_1	GTGGCTTCGACAAGTTGTCTTGAGCTTCCATGCCTTGGCTCTGTCCTTTTTTCTGCAGTTTGGGAGCACCTTTCCCTGGCTTTTGATTCGCATTTCTAGATAACTTCTCCAA	3.54096	3.73767	3.06805	0	0	0	1.90424	1.65292	2.46385	5.77827	6.82715	6.73934	0	0	0	1.09861	1.83258	1.75786	2.69124	1.88707	2.11021	1.50408	1.09861	1.69459	0	0	0	0	0	0
1085_bclustnum_4510_kamer_1_number_1	TTAATGGCGCATGCGATTGCTTTTATTTCCGCAATTAATGATCAATGGTAGAAGAGATTCTGTATTATGCATGAAGCAGATCGGAAGAGCGTCGTGTAGGGAAAGAGTG	0	0	0	0	0	0	1.09861	0	0	6.26302	6.74275	6.81069	0	0	0	0	0	0	0	0	0	0	0	0	0	0	0	0	0	0
108626_bclustnum_33_kamer_1_number_1	CTGTATTTATAGTGCTCAAGAGGAAGTTAATCAAGTCCCCATCATGGGATAATCCCCTCTTTGGATGGGAT	0	0	0	1.09861	0	1.09861	6.92854	6.92433	6.85841	0	1.09861	0	0	0	0	0	0	0	2.76362	2.86627	3.01694	0	0	0	0	0	0	0	0	0
108659_bclustnum_34_kamer_1_number_1	TCATTATCCGGGAATCAAGTCTAGAAACCACCTTATTACCCAAGAGCTTGCATGCCTCAATGGCAAGATTCTTTGTTTTAACATGGGTAAACATCATTGGACCTTGGCTGAAGGATTCCACCAGTGTTCGACTTCAGATCATCTATTCACACCTGATGGAATGTATTTT	0	0	0	0	0	0	6.57945	6.55759	6.6318	4.7719	4.80729	5.10139	0	0	0	3.7287	3.7013	3.82864	6.1091	6.00652	5.99263	4.5763	4.50066	4.52179	0	0	0	6.91473	6.90463	6.89099
108676_bclustnum_23_kamer_1_number_1	CAATCATAAAAAACTTACCCTCCACCACAATCTGGCATAGGCTAGGATCCAGACGGAAGGCCGTAACGAAACGCACGAACGGGAACGGAACGAAGGACGCTCTCGGTGGTCACC	0	0	0	0	0	1.09861	6.03628	6.20213	6.18084	5.48329	6.74641	6.85034	0	0	0	1.60944	1.97716	2.00747	6.48586	6.28674	6.20939	1.38629	1.09861	1.60944	0	0	0	0	1.09861	0
108732_bclustnum_200_kamer_133_number_2	CAGTACAATTCACGTGGCGTGAATAAAGGCTTGGCTCGAACGCCACACAAAATCTTCTGGTCGA	0	0	0	0	0	0	7.32075	7.37963	7.35713	1.09861	0	1.09861	0	0	0	0	0	0	3.02852	3.10608	2.75154	0	0	0	0	0	0	0	0	0
10873_bclustnum_776_kamer_3_number_2	ATGGCAACCATGATGGTGTTTGATATCACACAGATAGGTACATTAAGAATACAATGACACCATGTC	0	0	0	0	0	0	0	0	0	6.49325	7.1691	7.2194	0	0	0	0	0	0	0	0	0	0	0	0	0	0	0	0	0	0
108781_bclustnum_5_kamer_1_number_1	CCAGGAAGGATGAAAAAGATGAAGCCTTATTGTATGCCCTTTCAATATTACAAGAAAATTGGGTGGTGGAAGCCAAAGACAAGTGGAAAAATGATGTTGCAACAGTAATCC	6.50339	6.46987	6.47173	0	0	0	0	0	0	0	0	0	0	0	0	0	0	0	0	0	0	0	0	0	0	0	0	0	0	0
1088_bclustnum_2079_kamer_1_number_1	AGATCTTGAGACAGTCGAGCACTCACATATGCATGGGGACTCCAGAGCCAGGGGCAGTT	0	0	0	0	0	0	2.67415	0	1.94591	6.17289	6.50962	6.58024	0	0	0	0	1.09861	0	2.05412	2.19722	1.09861	0	0	0	0	0	0	0	0	0
10893_bclustnum_15_kamer_1_number_1	GCTGTTGTGTGTGGCTCCCTTGCTCGTCTTGGTCCCCGGGTGCCCCTTCAGATGATACCGGCGACGGGCTTCCTTTCCGTGTGGAAGGTGGGTTGGTAATTGAG	0	0	0	0	0	0	4.93878	4.85981	5.0093	5.50126	6.24183	6.51471	0	0	0	0	0	0	4.95018	4.71492	4.64823	0	0	0	0	0	0	0	0	0
108949_bclustnum_92_kamer_1_number_1	TAAGTAGGCTCAGCAATCTGAAACTCAGTAAAGACGTCCTCAAACAACAGTGCCTTGACTGGTTTCTTATATCACTTGTCTCTCTACTCAGT	0	0	0	1.09861	0	1.09861	0	0	0	0	0	0	0	0	0	6.60032	6.24675	6.03582	0	0	0	5.97126	6.04422	6.06456	0	0	0	0	0	0
108966_bclustnum_67_kamer_1_number_1	TGATCCGATTTGACTGATTCTGAGCAGTTTCTGGTGGAGAACTTCTGGGGGAAGCTGTAATTTGTTGACCTTGTTCCTTTAGGGGTTGGAACAACACTTTTAGGG	0	0	0	0	0	0	6.60123	6.60394	6.6034	0	0	0	0	0	0	0	0	0	3.69387	3.40489	3.09608	0	0	0	0	0	0	0	0	0
1089_bclustnum_2455_kamer_1_number_1	AGGAAAGCGTTCTCGACCATGGCCTCGTGTGAAGACGAATCTCTGCATCCGCACCAGCGCAAAGTGCTCTCGCAACGCACCCCATGGAACACGTCCACACCTCTATGGCCTCT	0	0	0	0	0	0	0	0	0	0	0	0	0	0	0	0	0	0	0	0	0	0	0	0	6.64674	7.09544	6.50904	0	0	0
108_bclustnum_5950_kamer_2_number_2	TCATCTATGTATTTTATATATATTTATTGTACTCTTAATAGAGATGTGTTTTCCTCATAAGGAAGTGTC	0	0	0	0	0	0	0	0	0	0	0	0	6.55088	6.47279	6.45632	0	0	0	0	0	0	0	0	0	0	0	0	0	0	0
109102_bclustnum_83_kamer_1_number_1	CTACATCAAAGTATAGCTATTTGGGTGAAAATATCCAAAAAGGCAACGTTGGTAGAAGCCTTTGAGAGNNN	0	0	0	0	0	0	0	0	0	0	0	0	0	0	0	5.7462	6.05678	5.92845	0	0	0	6.40144	6.52649	6.61874	0	0	0	0	0	0
109113_bclustnum_166_kamer_1_number_1	CTGTGGCACTCCTGCTGTGATCATCCTTGCTGGGATCCAAAAATAGAACTTGCGCCATAATTTGCC	0	0	0	0	1.09861	0	6.68752	6.56667	6.61651	0	0	0	0	0	0	0	0	0	4.64439	4.57127	4.85203	0	0	0	0	0	0	0	0	0
109144_bclustnum_18_kamer_1_number_1	AACAATCACTTATATTAAATTTAATTCATGTCTTGTTAAATATTTCATAATGAATTAGCTATTTGAGAGCACCACCTTAGACCAA	0	0	0	0	0	0	0	0	0	0	0	0	6.72863	6.70625	6.76706	0	1.09861	0	0	0	0	0	1.09861	0	0	0	0	0	0	0
10919_bclustnum_1058_kamer_1_number_1	ATCATGGTTCCCAAGAGAATAATGCTCTGGAACGATACCGTGTCAAGGGACAAAACTCGGTCATGAGACGTGACTGTTTCATTTTTTAATGACCTTGACACAGGAAAAGAACTATGCTCATAGACTCTGCTTGATCATGGCTTCCAAAATATCTTCGCTGGATGGAAGATAATCACTGGGAAG	0	0	0	0	0	0	6.01154	6.4887	6.00827	5.87867	5.44098	5.44817	3.39003	3.42318	3.36038	4.77715	4.7084	4.70315	6.14633	6.22522	5.99823	5.70711	5.29142	5.33994	0	0	0	7.52764	7.76571	7.58731
10919_bclustnum_2572_kamer_1_number_1	TGAGATCATGATTATGTTCTTGAGTCACACTTGGGACATTATTATATTCTTTTATAATTTTAAATAATACTTTAGGTAGAACCAACTGAGATCCTATTGATATTAGAGTTGTATCAAGATGACATAGAAT	0	0	0	0	0	0	0	0	0	0	0	0	6.57088	6.66185	6.55631	0	0	0	0	0	0	0	0	0	1.60944	1.09861	1.65292	0	0	0
10919_bclustnum_376_kamer_1_number_1	AATATAAGGGTCATTTTTACAATAAGATCGCTTCCATTGGTGAGACCCCTCCAGGAACAATTGGGGTTACTTCTTGAAGAACAAAGATGAAGTATTTAATAAGTTCAAGGA	0	0	0	0	1.09861	1.09861	0	0	1.94591	0	0	0	6.46372	6.64216	6.58617	0	0	0	2.00148	1.09861	1.79176	1.09861	0	1.09861	0	0	0	0	1.09861	1.82455
10935_bclustnum_1210_kamer_6_number_4	GAGCCACACAATTTCTTTTGTTGCTTTAGTTGTGCCGGTATTCTGCTTTCGATTCAAAACTCCGTGGGTATATAAATAAATGTATAATATAAAGCGGTGTTATTGATATATTGT	1.09861	1.09861	0	0	0	1.09861	6.37775	6.42616	6.37161	3.66356	4.32413	4.43082	0	2.56495	1.09861	0	1.09861	1.09861	7.31095	7.29315	7.25375	1.09861	0	1.09861	0	0	0	0	1.09861	0
10938_bclustnum_153_kamer_1_number_1	TCCAAAGTTTCTTTGGAGTAAAGGAGCAACAACTATATGCCAAACCATCCAAA	0	0	0	0	0	0	0	0	0	0	0	0	4.02535	3.9982	4.06903	8.09651	8.03722	8.07931	0	0	0	7.78297	7.96693	7.75697	0	1.09861	0	0	0	0
109420_bclustnum_81_kamer_1_number_1	CCCTAGCTCTGCGTCTCCTTGCCTTGTCCGAAATTCCTTGCTTGAACGCCCCCTCTTCGTTTGGCCTTAAGCCTATATACATGGTGCCGTGTGGGCGTGGGCGG	0	0	0	0	0	0	0	0	0	0	0	0	6.58534	6.58424	6.5599	0	0	0	0	0	0	0	0	0	0	0	0	0	0	0
109476_bclustnum_134_kamer_1_number_1	ACCCCGAGACCGCCCATGGGGGAAGAAAATAAAGATGAGGGAGCAGGAGATCCTATCAA	0	0	0	0	0	0	5.39059	5.37374	5.04557	7.46984	7.79523	7.80981	2.23359	2.59026	2.68558	6.44201	5.90081	5.95756	6.02667	6.09282	5.97889	6.30749	6.28972	6.2653	0	0	0	1.52606	0	1.50408
10950_bclustnum_656_kamer_1_number_1	GAATCTCTCACGAGATTATATTATCCTGTAAAATCATGGCGAATCACCAGTACAAATGGTGAATCTTTGTCAGTGGA	0	0	0	0	0	0	1.43508	1.09861	2.05412	5.95324	6.65434	6.7511	0	0	0	0	0	0	1.09861	1.09861	1.09861	0	0	0	0	0	0	0	0	0
10951_bclustnum_331_kamer_2_number_2	AGAATACAGCAAAAATGGGTCACAAAGATGTTGGGTTTTCACCCAATGTTCACAATTTGGGGATT	1.50408	1.09861	0	4.15888	4.23411	4.11904	8.33195	8.29941	8.32978	9.02936	9.12298	8.91498	0	0	1.09861	1.09861	0	1.09861	8.0841	8.09117	8.03625	1.60944	1.82455	0	0	1.09861	0	3.55535	3.6763	3.63759
10952_bclustnum_266_kamer_3_number_3	AGTGGGGTTGTAAGCAAGTACATACAAAAGGTGTTGAAAAGACTTAACATGCAGTGGG	0	0	0	0	0	0	6.89602	6.92854	6.82401	6.52013	7.05962	7.07355	0	0	0	0	0	0	7.65618	7.75162	7.66153	0	0	0	0	0	0	0	0	0
10952_bclustnum_266_kamer_6_number_4	AGTGGGGTTGTAAGCAAGTACATACAAAAGGTGTTGAAAAGACTTAACATGCAGTGGG	0	0	0	0	0	0	6.77878	6.6958	6.78897	5.78843	6.2757	6.117	2.19722	1.94591	1.60944	0	0	0	7.35947	7.28756	7.40032	0	0	0	0	0	0	0	0	0
10956_bclustnum_1037_kamer_1_number_1	TGATAAAGATAGTCATTAGTATTTTGAAGTACTAACCACTGCAGCATATATTCTAGCTTTGTTGTCTTGTCTCGCAAACAGGTGCCATCCCGTGGAAGAACTTCTCCTGACTATCTCCTACTTATCAATTGATGAGCTTAAGGGGCTTTCTAATGAATGGTTCATAAGGCACAACACTTGGTGAAGGTTTTGCAAATG	7.01681	7.05186	6.99138	0	0	0	0	0	0	0	0	0	0	0	0	1.09861	1.49393	1.09861	0	0	0	1.91365	1.76359	0	0	0	0	0	0	0
109594_bclustnum_19_kamer_1_number_1	TGAAGAAATAATTGCATTGAAAATCCAACTTGAAGAAGCAAAGAGAACAGAAGAAAGAAGAAGTTGTCACACTAAGAGCAAAATGACAAGCTCAACAAGA	0	0	0	0	0	0	0	0	0	0	0	0	0	1.43508	1.09861	6.11368	5.78821	5.51504	0	0	0	6.57415	6.1088	6.02442	0	0	0	1.09861	1.09861	0
109612_bclustnum_53_kamer_1_number_1	TGCAAAGATAGAGGCACAAATTGAGGGTCTCAAGATTGCAGGTCTATGGAAATGGGAAAACATGTTGGACTCCCATATCAGTATTCCTGAAAGGCATAAAAAACCCTCAAAAAAGGAAAAAGGGAATTAAAATATTATTTTTATTCAAAAAGG	0	1.09861	0	0	0	0	1.09861	1.09861	0	0	0	0	7.53138	7.35327	7.51698	0	0	1.09861	0	0	0	0	1.09861	0	0	0	0	1.60944	0	1.09861
10961_bclustnum_398_kamer_1_number_1	GTCGCAACTCCAAGAATCTCAAACTGGAATCCCCGAACCATGCTCCGTATGTCTAAAAATAGAGTCTCATCTATTTTTACCAACATGACACATACTTCAAGAAT	0	0	0	0	0	0	5.55683	5.63954	5.85278	6.53495	6.46956	6.41706	0	0	0	0	0	0	5.75363	5.48835	5.47287	0	0	0	0	0	0	0	0	0
10961_bclustnum_79_kamer_10_number_3	GGAATTCCCAAATTATGCTCCGTATGTCTAAAAATAGCTTTGCCCAGAATTTGCCTGCGGGCCCACTT	0	0	0	0	0	0	3.82864	4.1325	3.81404	6.68693	6.93745	6.92321	0	0	0	0	0	0	4.02535	4.12174	3.74557	0	0	0	0	0	0	0	0	0
109640_bclustnum_94_kamer_1_number_1	AGAGGTAAGGAATAATCAATCCTCTCATCTTGAAAATCTTGTAACTCAATTATCAAATGAAATGAGAAATTATGAATCTAAGATCTGAGAATGAAAGTTTGAGAAATGATTTA	6.84229	6.81235	6.79071	0	0	0	0	0	0	0	0	0	0	0	0	0	0	0	0	0	0	0	0	0	0	0	0	0	0	0
10965_bclustnum_252_kamer_1_number_1	ATAATGTATTTGAACGATAGTCATGACTGTCAAGGGCTTTGACATGGTTGGGTGAATAAATCCAAGGATTCAACACTAAAGGAAGGTCCGTGATTACATAGATATAAAAAACAACTCAAAACACCACATAAGACTGCTTGAGATTATCATTGCCTTTGAGTGG	1.09861	0	0	0	0	0	1.09861	0	0	0	0	0	0	0	0	0	0	0	0	0	0	0	0	0	0	0	0	6.5216	6.42832	6.46157
109666_bclustnum_15_kamer_1_number_1	AAGCATATCAAAACTAGGCATTTAGGGATACTGAAACGAGTAATAATATTTGAAT	0	0	0	0	0	0	7.25509	7.30701	7.326	5.57324	5.71844	5.69469	1.09861	0	1.09861	0	0	0	8.71241	8.547	8.55842	0	0	0	0	0	0	0	0	0
109678_bclustnum_293_kamer_1_number_1	AAGTTATTTCTTATTTTGGTACCCAATTGGCTCACAGTTCCTCTTACCATCCTCAATCTGATGGGAAAACTGAAATTGTAAATAAATGTTTGGGGACTCAATTGG	1.70475	2.15948	1.79176	1.69459	0	0	7.46247	7.35398	7.47829	5.36442	5.1233	4.98285	5.18863	5.34021	5.38907	3.69165	3.88728	4.10722	7.32376	7.28185	7.29234	4.34092	4.25008	4.22114	1.09861	0	1.09861	4.5861	4.57012	4.61292
10967_bclustnum_409_kamer_1_number_1	CAACATAGTTCCAAAACAAAAATTTTCTGGGGCGCTTCTTCGAACCCCATAAAGTGGGGTTATGAGTGCCCCTCAAACCACCTGTTAACTCCCAAAATGAAACCGTCCTTTCGTTTGAGTTTTGGGTAGTAGCTTCAAGTCATTTTTGAGT	0	0	0	0	0	0	5.41313	5.3547	5.49031	0	0	0	0	0	0	1.88707	2.36085	2.70805	6.53169	6.44907	6.45362	0	1.48808	1.09861	1.09861	0	0	0	0	0
109735_bclustnum_11_kamer_1_number_1	CGGTTAAAGCCCTGAATGTTCGCGTTTACCTTGCGTGTACGCGCAGGAAAGACTGACGTTCTTACTGACGCAGAAGAAAACGTGCGTCAAAAATTACGTGCAGAAGGAGTGATGTAATGTCTAA	0	0	0	0	0	0	0	0	0	0	0	0	0	0	0	0	0	0	0	0	0	6.73717	6.67224	6.44783	0	0	0	0	0	0
10976_bclustnum_900_kamer_1_number_1	TGATCGCACTGGTACCACTTCATAAACTAGAGACTTGTTGCACCTATAAGTCTCGTCTCCTCAGGGTCAGTCCTTA	0	0	0	0	0	0	0	0	0	5.55683	6.72675	6.74204	0	0	0	0	0	0	0	0	0	0	0	0	0	0	0	0	0	0
109798_bclustnum_64_kamer_1_number_1	TTGGGATCAGAGTTTGATTTTTAGCTTAGATTCTTAACTCGTTGTATTACAGCTTAACAATATAGAGTATAGGGCAGTTACTGAGTTATTATCTGAATCCATCTCCTTTGGGA	0	0	0	0	0	0	5.92353	5.97612	6.02213	3.90289	4.69302	4.49271	0	0	0	0	0	0	6.41242	6.60382	6.46303	0	0	0	0	0	0	0	0	0
10986_bclustnum_330_kamer_1_number_1	AACTAGGGTAGTGGTCCTGAGACCACCGGTTGCATTGGCAGCGATCCTAGCTCTTTCAGACAGAAAATAAAAAAACATGAAAT	0	0	0	0	0	0	1.54045	1.5506	1.09861	5.3696	6.66058	6.67189	0	0	0	0	0	0	0	1.09861	1.09861	0	0	0	0	0	0	0	0	0
1098_bclustnum_2378_kamer_1_number_1	ATGCAGGAAAAAATTGCGAGATCATAGATGAGACATTCTTGATGAGCAAAAAAGTAGATTGCTATAGTAAAAAATGAATTGATCCAATTA	6.68669	6.67834	6.67526	0	0	0	0	0	0	0	0	0	0	0	0	0	0	0	0	0	0	0	0	0	0	0	0	0	0	0
109904_bclustnum_43_kamer_1_number_1	ATTGAATGGTCAAAATTTTGAATTTTAATGCAATATTACAAAAAAATAAAAATTGAATCTACTGTTCTATCAGTAGTTTGTTTAGTTGAGGAGGAAAACCACTAGGACTTATGGCCTCTGTTGGTCACCAACTTGATTTCTAGGGATCCTCCAATGAGCATGCCAACCTCCACCACCATA	6.93763	7.11004	7.06595	0	0	0	0	1.09861	1.60944	0	1.09861	1.09861	0	0	0	0	0	0	1.15745	1.88707	0	0	0	0	0	0	0	0	0	0
10993_bclustnum_293_kamer_5_number_2	GAGTTAATCGGCAGAGGGTAAACTCTGGAAGAAGGCCATGGTCAAAGAAATGGAATCCT	0	0	0	0	0	0	1.09861	1.09861	1.09861	2.59525	2.3979	2.10413	1.60944	1.82455	1.09861	6.43069	6.32555	6.191	0	0	0	6.45782	6.43828	6.64613	0	0	0	3.45527	2.77259	3.50656
109942_bclustnum_87_kamer_1_number_1	TCAAAGTAAAGGAAGGAAATAAAACAAGACAGACCAAGCCCACAACCTCTCTTAGAAATCCCCCCCTCGACGTCCACTTGGACATGTTCCAGTATTCCGAATTGGCTCAGCACCTTTTGATTGGACACCAAAAATAT	0	0	0	0	0	0	3.84405	3.93183	4.2826	0	1.60944	1.60944	0	0	0	0	0	1.09861	7.11721	6.84295	6.94601	0	0	0	0	0	0	0	0	0
10999_bclustnum_812_kamer_1_number_1	TAGTATTAAAATCTAATCTAACCTATTCTAATACTAAGGAAAATCTGAAAAGAATTAATTATTACTGGGGGTAGAAACCCCCTTGATGAAAAG	0	0	0	0	0	0	0	0	0	0	0	0	0	0	0	5.60539	6.63551	6.50146	0	0	0	0	1.09861	1.50408	0	0	0	0	0	0
1099_bclustnum_1578_kamer_1_number_1	CAGGGGTCGATGGTCTTTGTGGATGACCATTTCCTTCCCCAAATGTATGCTTCCATTGT	0	0	0	0	1.09861	0	7.05214	7.15487	7.0076	1.79176	2.5337	1.94591	0	0	0	0	1.09861	0	6.81747	6.77727	6.77765	1.09861	0	1.09861	0	0	0	0	0	0
109_bclustnum_0_kamer_1_number_1	CTAACCAGCCTTGACGAACGTGCCAAGCATATTAAGCCACTTCTCCTCATCCAACGCGTCAGTTTTTGACAGAATCGTTAGTTGATGGCGAAAGGTCGCAAAGTAAGAGCTTCTCGAGCTGCGCAA	0	0	0	0	0	0	0	0	0	0	0	0	0	0	0	0	0	0	0	0	0	7.88363	7.7966	7.53894	0	0	0	0	0	0
109_bclustnum_780_kamer_1_number_1	CATGAAAAAATGTGACTCATATCTAAACCAGTCCTTGACGAACGTGCCAAGCATATTAAGCCACTTCTCATCATCCAACGCGTCAGTTTTTGACAGAATCGTTAGTTGATGGCGAAAGGTCGCAAAGTAAGAGCTTCTCGAGCTGCGCAAGGATA	0	0	0	0	0	0	0	0	0	0	0	0	0	0	0	0	0	0	0	0	0	6.90888	6.86478	6.6276	0	0	0	0	0	0
10_bclustnum_34_kamer_1_number_1	TCTACGATCAATTCAGGGACCGCAGTCCGGGGATGATACAATCCCCACTTCTCGGAGACCTCACGTCTACG	0	0	0	0	0	0	0	0	0	0	0	0	6.80509	6.7531	6.84238	0	0	0	0	0	0	0	0	0	0	0	0	0	0	0
10_bclustnum_7_kamer_1_number_1	ACGGCTCTCTTTAGGACTGAAAGTCCAGGGATGATCCAATCCCTTTTCTTTCTCGGAGACACCTGTCTACGGCTCACTTAGAAA	0	0	0	0	0	0	0	0	0	0	0	0	6.59236	6.58445	6.62672	0	0	0	0	0	0	0	0	0	0	0	0	0	0	0
110066_bclustnum_48_kamer_2_number_2	AAGTCTGAGCCAAATTGGATTCTCCAAGGAAGGATATGGAAATCTCCCACAATGACTT	0	0	0	1.09861	1.09861	1.09861	7.95928	7.92492	7.94165	0	0	0	0	0	0	0	0	0	7.4624	7.5206	7.48829	0	0	0	0	0	0	0	0	0
110116_bclustnum_39_kamer_1_number_1	CTTACCAATCCTCTTTCAACATTCATGCAATTTGGCACCAATAATCATTACCTGC	0	0	0	0	0	0	0	0	0	0	0	0	6.57284	6.51708	6.34247	0	0	0	0	0	0	0	0	0	0	0	0	0	0	0
110186_bclustnum_32_kamer_1_number_1	TAATTAACTAATTAATTCACTCCACTCTCACTAGTGTATCAATCAGTTAGATTAGATACACTCCAG	0	0	0	0	0	0	0	0	0	6.57832	7.76189	7.72415	0	0	0	0	0	0	0	0	0	0	0	0	0	0	0	0	1.09861	0
110186_bclustnum_44_kamer_1_number_1	CACACCACTCTCACTAGTGTATCAATTAGTTAAATTAAATACAACTCCACCAACTACTAGATCGGAAGAGCGTCTGTAGGAA	0	1.09861	0	0	0	0	0	0	0	5.78306	6.57601	6.56103	0	0	0	0	0	0	0	0	0	0	0	0	0	1.09861	0	0	1.09861	0
110186_bclustnum_87_kamer_1_number_1	TAATTAGTAAACTAAACACAACTCCATTAACTTCCTCAATCAAATCCACCAAACTCTGTCACATGAG	0	0	0	0	0	0	3.20738	2.89828	2.81626	6.12218	6.66823	6.62369	0	0	0	0	0	0	3.42473	3.12299	3.50656	0	0	0	0	0	0	0	0	0
11025_bclustnum_1820_kamer_1_number_1	AAAAAGTTTGGCACACCCTCTGCCTAGAACTCCAGAGCAGTTTCTTTTGGCCTTTTTCAAACTCTATAACCGAAAAAGTCCATCCGAGCCTTTGTCACTCGGGCCGTTAAAACATCGAAGGAGACTAGAG	0	0	0	0	0	0	7.18438	7.1305	7.14045	0	0	0	0	0	0	0	0	0	0	0	0	0	0	0	0	0	0	0	0	0
110309_bclustnum_326_kamer_1_number_1	TGGATGAGTAAAAGACAGTCTGTAGTGGATCTTTCAACTATAGAGGCGGAATACAAGCAGACGGAAGAGCGTCGTGTAGGGGAAGAG	0	0	0	0	0	0	1.09861	1.43508	0	5.86363	6.50827	6.57971	0	0	0	1.60944	1.09861	1.09861	1.52606	1.60944	2.15176	0	1.09861	0	0	0	0	0	0	0
110329_bclustnum_16_kamer_3_number_2	TTCCTCAATCTGAGGATATCAAACAAAGCAATCCCCTTGAGATAGAAGGCAACAAGACGTCTTGAAGGTGGATTTTTGGGTGAACA	6.59987	6.54607	6.57682	0	0	0	0	0	0	0	0	0	0	0	0	0	0	0	0	0	0	0	0	0	0	0	0	0	0	0
110329_bclustnum_30_kamer_1_number_1	GCACAAAATAGCACTTGAATCAGATAGCAATGTTCACAGGACTCTTTGAGGGGGCAATCTCCAGTTGAGCAGCGCTCTATTACAATAATATCCAAGCTAGGGTTTTTCATACCCTCGACCCTTATTTATACTAACTATGTCTATTAGAATAATA	0	0	0	0	0	1.60944	1.09861	0	0	0	0	0	1.09861	0	0	6.21632	6.78784	6.6475	0	1.09861	0	6.42672	6.38832	6.40168	0	0	0	1.60944	0	1.09861
11032_bclustnum_2295_kamer_3_number_3	CAACCACTAGCAAACTGTCTCGGACATTTGTCCATCCTTGCCCATCGCACCCTATAGAAGGCCTAATCAGTATGCATCTCACCCTGGCAG	0	1.09861	0	0	0	0	6.27769	6.30119	6.23026	0	0	0	0	0	0	0	0	0	7.19768	7.12474	7.17174	0	0	0	0	0	0	0	0	0
110340_bclustnum_149_kamer_1_number_1	TCTTTCACCGACTCGTTTGGTATTTCTATGCCTTTCAGTCCATATGAACGTGCTTATGAGACCTTAGTGTCTTTCATCGACTCGTTTCAACCAAGTCGACCAAATGAATGTGGTCCATGAGGC	0	0	0	0	0	0	3.81991	3.7329	3.55535	0	0	0	0	0	0	0	0	0	8.02987	7.88633	7.92274	0	0	0	0	0	0	0	0	0
110346_bclustnum_44_kamer_1_number_1	CTGGGAGAGGTTTCCATGGATTTCATCACAAGGTTACAAAAGTCTGAAGGAAAGAGTGTCATCATGGTG	1.09861	0	0	2.31677	1.5506	2.2882	7.61107	7.62983	7.68728	7.61389	7.20117	7.09448	2.74544	2.68882	2.89828	4.8882	5.0267	5.02105	7.27369	7.37928	7.31901	5.59471	5.66147	5.68698	1.09861	1.09861	1.60944	2.37158	2.09714	2.19722
11038_bclustnum_868_kamer_1_number_1	TGTCATATAATGATGTATTGGCTTCCCGGAGTAGACAAAGATGCATGGAGAGTTGATGGAACAAGTACAGATAATCTTGCATGTG	0	1.09861	0	1.79176	1.09861	1.09861	8.37448	8.36929	8.41121	7.26969	7.76618	7.80216	0	0	0	1.94591	1.84583	1.84583	9.26912	9.24887	9.22987	0	2.10413	1.8718	0	0	0	0	0	0
110429_bclustnum_163_kamer_1_number_1	GAGTTTTGTATTGTTACTAACGTGGTGGTTTCGGGTCAGGAGTTTGAAGCAGAATCGAGATCTATAATTGATCAAGAAGGATGGTTAGATATCCTTGAGGAGAAACAAAACTATAATCAAAAATTTATT	6.52708	6.2913	6.33977	0	0	0	0	1.09861	0	1.09861	1.09861	0	0	0	0	0	0	0	0	0	0	0	0	0	0	0	0	0	0	0
110472_bclustnum_15_kamer_1_number_1	TCGGACATAGGATATTCATCCTAGTTATTATGGGCATATTTGTCCAAATCTGAAATATTGAGGATGTTATTTTTCATTTTTTTATCGT	0	0	0	0	0	0	4.48363	4.66867	4.53499	3.19867	4.15497	4.00278	0	0	0	0	0	0	8.16599	7.83541	8.00796	0	0	0	0	0	0	0	0	0
110539_bclustnum_96_kamer_1_number_1	TTATTTTGGTAGGTAAAAATTCCCATGCAATATTTGGTTAGCCCCTACTGCTGCTTGGGTTGACATCAATGACAGCCACTGATCAACACAGATCGAAGAGCGTCGTGTAGGG	0	0	0	1.09861	1.09861	1.09861	4.91184	4.84419	5.05483	6.4395	6.7051	6.6182	0	0	0	0	0	0	4.76407	5.03695	5.02169	0	0	0	0	0	0	0	0	0
110564_bclustnum_29_kamer_1_number_1	TTTGGGGGCTCCAGCCGGTGCCCAAAATTTGGGGTTTCCACCCGGTGCAATTGGTAATATTTCACAATGTTTTTAGCACGTAAATG	0	0	0	0	0	1.09861	8.33677	8.3256	8.30524	0	1.09861	0	0	0	0	0	0	0	8.95372	8.58459	8.82723	0	0	0	0	1.60944	0	0	0	0
110576_bclustnum_13_kamer_1_number_1	TAGATAATTTTGTTGTGAACAATGTTGTAGTTCTTCTTTTGTAGGAGATGGCATACGATCTTTACTACACAACAAGTTAAATTGCATGATTAGAAAACAT	0	0	0	0	0	0	0	0	0	0	0	0	6.7093	6.65338	6.70613	0	0	0	0	0	0	0	0	0	0	0	0	0	0	0
110618_bclustnum_137_kamer_1_number_1	TATTGCAAAGCTTCCTTCTAATTCCACTGTCGTTCGGGTGAAGGTAAAACCGTAGAGTTTTCACCTCACCAAGTTGTGATCAAGGATCTAAAATATCCTAAGCATGTTCTTGCAACTAGAATTGTT	0	0	0	0	0	0	2.53017	2.79321	2.69124	0	1.42139	1.09861	3.18842	2.90417	2.78501	6.35298	6.49557	6.41739	0	1.09861	1.6864	6.52723	6.66975	6.75157	0	0	0	2.77825	3.15463	2.74377
110624_bclustnum_303_kamer_1_number_1	GTGAACCATTTAGGCACCCCGCACTTGCTGTCTAGCACTATCCTTCATGTGGGATCTAGGATACAATGTAACTACCCCATATCTTGTATCTCTTCTAGAAACTTCTCCTAGAATCCATTTGAATTCACC	6.6107	6.59919	6.61841	0	0	0	0	0	0	0	0	0	0	0	0	0	0	0	0	0	0	0	0	0	0	1.09861	0	0	0	0
110633_bclustnum_83_kamer_1_number_1	TAGCATGGACACCGGAGATCCTGAAAATAAATTAATAATTCACAAACAAATTCAACAAGGTATCAAAACATTCTTGAGTACATATGAAG	0	0	0	0	0	0	0	0	0	0	0	0	0	0	0	0	0	1.09861	0	0	0	1.09861	0	0	0	0	0	7.18809	7.0418	7.18225
11063_bclustnum_6282_kamer_1_number_1	GACAGAGGAAAGTGCAACATACATTTTACATGTTTTTGAAGCATTAATGTACTGGGCTACCTTCTCCTTTGACAATTCTCTATGCCCAGGCCAAATAGTCAACTTGTAGAACTCCTTGGTATAATCTTTCA	6.37123	6.50112	6.51471	0	1.09861	0	0	0	0	0	0	0	0	0	0	0	1.09861	0	0	0	0	1.09861	1.94591	1.09861	0	0	0	0	0	0
110714_bclustnum_114_kamer_1_number_1	TCATCACCATCTTCATCATCATTGTTAACTCTAGCCCTAACCCTCACCCAAACCCTTCACTA	0	1.09861	0	0	0	0	0	1.09861	0	0	0	0	6.59487	6.5216	6.62052	0	0	1.09861	0	0	0	0	0	0	0	0	0	1.09861	1.09861	1.09861
110787_bclustnum_126_kamer_1_number_1	ATCTCATTTCCTCCGACAGCAAGGCTGAGACAATGTCATCAAAATTCAAGGTAGTTTTATTGCTACCTATTGCAATAACCAGATTGTCCCACGAGTCTGCCAACCCGTGAACCAGTTGATTTTTGAAAAATACTAATATGGTAACTAGAAAGGGAAAAGAGAAGGAAGAAAATAAAATGGGAATTAGGGGAGGTATATAAGAGGGAAA	0	0	0	0	0	0	6.6005	6.65346	6.88305	5.99127	6.21447	6.45701	0	0	0	2.51514	2.56495	2.03229	7.32835	7.6293	7.42553	2.43142	2.53568	2.91063	0	0	0	0	0	0
11087_bclustnum_8880_kamer_1_number_1	ACAAAAAGGCCAAAAAAGTCTATAAATAGAAGCTGGCAGCTCATTATCACCATTGTTGATTTGGAAATTGACTTTGGAACCAAAAGA	0	0	0	0	0	0	0	0	0	1.09861	0	0	0	0	0	6.06843	7.37165	6.88755	0	0	0	6.79291	6.78417	6.8192	0	0	0	0	0	0
110901_bclustnum_204_kamer_1_number_1	ATCAAGTAGGTTTCCATCATCTTCATCAAGTGGGTTGCCATAAAGGACAACACTCTGCATCATATTGCCAACAAGGAGGCAGATATAGTTGTCCCAC	0	0	0	0	0	0	0	0	1.09861	5.72685	6.41469	6.52613	0	0	0	0	0	0	1.09861	1.09861	0	0	0	0	0	0	0	0	0	0
110923_bclustnum_78_kamer_1_number_1	CTTCCAATTCCAAGGGTTGATGAATTTTTGGTCATGCCTTTTGGCCTTACAAATGCACCTTCCA	1.09861	1.8718	2.07944	1.43508	1.09861	1.60944	0	2.28238	1.88707	2.10413	1.50408	1.09861	3.25037	2.92316	3.39451	5.36878	5.47143	5.47814	1.52606	1.82455	1.09861	7.29614	7.24408	7.30344	0	0	0	2.05412	1.88707	1.88707
11092_bclustnum_2299_kamer_1_number_1	GTTCTATTTTCAGAAAGTAGAGGAGTGGTATTCTGTCTATCAAGAAAACACAGAGTAA	0	0	0	0	0	0	0	0	0	0	0	0	6.70618	6.69827	6.62995	0	0	0	0	0	0	0	0	0	0	0	0	0	0	1.09861
11111_bclustnum_1765_kamer_4_number_2	TGCTTTTAACTATGAAATCAACATGTAGCCAATCAGAAAATTGGAGACAACATGCAACAATAGGGAAAACAAAGGC	6.45092	6.50365	6.47851	0	0	0	0	0	0	0	0	0	0	0	0	0	0	0	0	0	0	1.09861	2.19722	1.79176	0	0	0	0	0	0
11112_bclustnum_20_kamer_1_number_1	GTGCGCTCCAAATCTCCAATCCCAGTAAATAATGAAGGATGCCCAAGTCCTTCATCTCGAACAGATCGGAAGAGCGTCGTGT	0	1.09861	0	0	0	0	2.3979	2.30259	1.76766	6.39275	7.24127	7.38316	0	1.09861	0	0	1.29928	0	2.07944	2.3979	1.60944	1.09861	0	0	0	0	0	1.09861	1.09861	0
111141_bclustnum_85_kamer_1_number_1	GATGTGCTGGGGGATAGAGTGATGACGATAAAGATGTTGATGAGGAACCTACAGATGCCAATGATGATGTGCCTGTGTACAGAATAATGACATGAACAAAATGAGATGATA	0	0	0	0	0	0	0	0	0	0	1.09861	0	7.4055	6.91413	6.87997	0	0	0	0	0	0	0	0	0	0	0	0	0	0	0
11117_bclustnum_97_kamer_1_number_1	AAAAAGTATTTATGAAAACAAATTAAAAAGAAGAGATTATTTTTCAATTATGAGGTGATAATCATTCAATACAAT	1.09861	0	0	0	0	1.09861	0	0	0	0	0	0	1.52606	1.46634	2.3979	0	0	0	0	0	0	0	0	0	0	0	0	6.84765	6.83626	6.81124
111194_bclustnum_4_kamer_1_number_1	AGATGAAAGCTTGGCAAGTTTGAACCTAGATCGGATGAAGGGATATTTCTTGGTTACTCATCTTCAAGCAAAGCATACACATGTTACAATAAAAGGCTTCGAAA	1.75786	1.09861	0	0	0	1.60944	4.88884	5.02782	5.0093	6.37127	6.69703	6.60584	0	0	0	2.45101	2.28238	2.77259	5.27811	5.26579	5.27095	2.76001	3.11795	3.11795	0	0	0	0	0	0
111214_bclustnum_26_kamer_1_number_1	CACCCGCTCTTCGGCAAGCACACACGATACGCACAGGGTGAGGGCGCGGGCATATATGCACCCGCCGTTCGGTGTGACACGGGTGTCTC	1.09861	0	0	0	0	0	3.99922	4.13606	4.26268	0	0	0	0	0	0	0	0	0	6.605	6.20186	6.03095	0	0	0	0	0	0	0	0	0
111243_bclustnum_205_kamer_1_number_1	GCTTCAAGATATTTGATGTACTAATCTGCTACGCTTTTATGTTATGTGTCGCTATCCTT	0	0	0	0	0	0	1.60944	1.09861	1.09861	1.09861	1.60944	1.09861	0	0	0	6.87454	6.89568	6.9144	2.77259	2.59026	2.94444	7.46566	7.52348	7.45588	0	0	0	0	0	0
111271_bclustnum_48_kamer_1_number_1	TGTACATGTCCATGAGCTCCTTCATCTGAAATTTTAATATCAACAGATACTACTGACTACCACAGTATTGAAGGCATTCAAATGCTCTG	0	0	0	0	1.5506	0	7.02475	7.1299	7.11842	3.28653	3.89691	3.90197	0	0	0	6.0742	5.62161	5.87563	8.02445	7.96485	8.0197	6.87394	6.87083	6.8934	0	0	0	0	0	0
11127_bclustnum_2440_kamer_1_number_1	ATTTAATTCGATATGGATATCTCATTTATCTTGGATATGCAAAATTAGACATGTTTTGTTATTTTTATTTAAA	6.63463	6.72863	6.7546	0	0	0	0	0	0	0	0	1.09861	0	0	0	0	0	0	0	0	0	0	0	0	0	0	0	0	0	0
111287_bclustnum_268_kamer_1_number_1	AGAACCGTTTTAGCAAAGTATGTTCGGAGGCATCATTCAGCTGATCAGATCATTGGTGAGACATCAGAAGGAACCATGACAAGAAGTAAGTTAAAAAG	7.03066	7.01959	7.00579	0	0	0	0	0	0	0	0	0	0	0	0	0	0	0	0	0	0	0	0	0	0	0	0	0	0	0
11128_bclustnum_303_kamer_3_number_2	AGTTTGGAAATTGATTCCTGCACTACTTGGTTGTGATAAGAGACATGGCGGTCT	0	0	0	0	0	0	6.60458	6.66823	6.62725	1.09861	1.09861	0	0	0	0	0	0	1.60944	7.33498	7.26501	7.19998	0	0	0	0	0	0	0	0	0
111321_bclustnum_220_kamer_1_number_1	AGGCCAAAAGTAACCGACGCAAAGTATCTTTTACGTGGTAGCATCTCCAGACAAGTGTCACCACAGCCTTAGCATGATACAATGCCAAAGAGTGAAACCCTAGATGCCAAGACCAAACCCAAGTGCCAAGCCT	0	0	0	0	0	0	0	0	0	1.76766	1.70475	1.60944	0	0	0	0	0	0	0	0	0	0	0	0	0	0	0	7.80844	7.90254	7.87621
111327_bclustnum_25_kamer_1_number_1	ATCTACCTCTTTCCCTACACGACGCTCTTCCGATCAGCCCTCATAAGGGCACAAAAACTAAAGCGCACCCGTATTTATTATGGGCAACTACCATAGGTCAGACATCCGCAGACCCTTCTGCTGTAGTGCCATCCATGGCAACT	0	0	0	0	0	0	0	0	0	10.2529	0	0	0	1.38629	1.75786	0	0	0	0	0	0	0	0	0	1.09861	1.09861	2.19722	0	0	0
111340_bclustnum_51_kamer_1_number_1	AGTATCTACAACCCCAGTTCTACTGTCCTCAGACCTCTGTGCCTCAGTCTAGACCTACAAACCAGACTTCGGTCCAGATGCCTATTGGGAGTACAGTTGTTACATCTCAACCTCAATTTATCCAACTTCC	0	0	0	0	0	0	1.60944	0	1.88707	0	2.32239	1.09861	0	0	0	0	0	0	6.60957	6.58667	6.47697	0	0	0	0	0	0	0	0	0
111367_bclustnum_35_kamer_1_number_1	AATGGAGGGTAGTATCAACCACCACCTACAAGACTCTATGGGAATGGACGAACAAGTAGCTGATGTAAGGGGAGTGTTAGCACTCAAATCTACCTCAGGCTGAAATGAATGGAGACCCTCATTCTCCTATTCCGGATATTATTCCATATATATTTTCCACGACCTCCATGGCCCTAA	0	0	0	0	0	0	1.09861	0	0	6.34914	7.02997	6.91354	0	0	0	1.09861	0	0	4.23411	4.33729	4.20469	0	0	1.09861	0	0	0	2.42354	2.62104	2.84988
111426_bclustnum_102_kamer_1_number_1	TAACATACTACATGGAAGGAATCAACTGGGGGAGGACTCGCTGATATCCTAT	6.768	6.70042	6.84421	0	0	0	0	0	0	0	0	0	0	0	0	0	0	0	0	0	0	0	0	0	0	0	0	0	0	0
11146_bclustnum_3956_kamer_1_number_1	GGGACTCTGTTGTATGGTTGTAGTCTTAAAAATACCCAATCCCCTACTTCAAAACTTCTTTCACTACGATGTTGATCTACTTGTTGTTT	1.09861	0	0	1.35812	2.07944	1.60944	5.72104	5.84419	5.79876	2.64696	3.12579	2.54771	2.12026	2.45674	2.73725	7.53838	7.49573	7.49942	5.7568	5.7568	5.761	7.8248	7.84911	7.86809	0	0	1.09861	2.89653	3.04452	2.90872
111509_bclustnum_157_kamer_1_number_1	CTTCTTGCATCTGAACTCCACCAAATCCTTATAAAGATCATTTAGCACACTACATATTCTTTGTCAAGATCTGCAATTTTTAAAA	1.09861	0	0	0	0	0	0	0	0	10.5033	0	0	0	0	1.09861	0	0	0	0	0	0	0	0	0	1.38629	1.84583	1.09861	0	0	0
111603_bclustnum_17_kamer_1_number_1	AAGGGATAAGTATGGACCAATTTCAATACTTCCAATATGCAAGGATTCTCATTTCCCATTTATTAATCCCAGCCTATTCACCGTTTAGTTATGGGGAATACCCCCCATTCTAATAACAAACAGGATTAATAAAT	0	0	0	0	0	0	0	0	0	0	0	0	0	0	0	0	0	0	0	0	0	0	0	0	6.35517	6.53099	6.42412	0	0	0
111613_bclustnum_92_kamer_1_number_1	ATTGGTCTGTCCTAATGCAAGAAGGAAGGCCCCTAGATTTTGAAAGTCGACCACTCAAGGGAAATGACTTACACAAACCCATTTATGAGAATAAAAT	0	0	0	0	0	0	1.55814	0	1.09861	1.09861	0	1.38629	1.09861	2.33537	2.03688	7.16489	7.10615	7.07224	1.09861	1.09861	1.88031	7.22507	7.24288	7.22086	0	0	0	0	0	0
111618_bclustnum_16_kamer_1_number_1	TCAAACTCATGTAGTGTCTAAGAGTAACCAAGTGATTATGTCTGAAACCTATTTGATCTTAATTAATTTAATTCAAATTATTTATACTTTGGTTAAAATAATTATCTCCTAAGACTAATGTACTAAAGGATTAAAA	7.06185	7.01553	7.01481	0	0	0	1.09861	0	0	1.09861	0	0	0	0	1.09861	0	0	0	0	0	0	0	0	0	2.35138	3.02042	2.77259	0	0	1.09861
11161_bclustnum_267_kamer_1_number_1	GAGCATGGAGGGTCATTGTTTAGTTGATCGATTATGAGAAGCTCATTTGTAACTTTCTTTCTCTGCATAATAAATTGTCTCGTAGAAGCTATTTTGCCAGGTGCGGGAGA	0	0	0	0	0	0	0	0	0	0	0	0	7.05186	7.04752	6.96111	0	0	0	0	0	0	0	0	0	0	0	0	0	0	0
111642_bclustnum_121_kamer_1_number_1	ATTATTTTGAAATGCCCAAATTTCCCACATTTCCATCATTTCTTTAAGAATTTTCCTGGAGATTTAGATCTCCCACTAGAGGACTTATTTTTATTTCAATCCAGGGAACGTCCTCTTACAAATAAGGCATCCATGC	0	0	0	0	0	0	5.27471	5.3799	5.37759	2.81159	3.51155	3.47019	1.60944	0	0	1.64223	2.69774	1.36688	6.6203	6.511	6.45023	1.09861	1.94591	1.98893	0	0	1.09861	1.09861	1.7492	0
111642_bclustnum_25_kamer_1_number_1	CATTCTTTAGAATTTTCCTGGAGATTTAGATCTCCCACTAGAGGACTTATTTTTATTTCAATCCAGGGAACGTCCTCTTACAAATAAGGCAT	0	0	0	0	0	0	5.48756	5.56622	5.62642	3.00568	3.21888	3.00285	0	0	0	1.09861	0	1.44692	6.78055	6.61309	6.71727	1.09861	1.84583	1.52606	0	0	0	0	0	0
111720_bclustnum_40_kamer_1_number_1	TGCCGCGATTGGTTTCGCTGAATCAGGTTATTAAAGAGATTATTTGTCTCCAGCCCCTTAAGTGAGGTGATTTATGTTTGGTGCTATTGCTGGCGGTATTGCT	0	0	0	0	0	0	0	0	0	0	0	0	0	0	0	0	0	0	0	0	0	6.91751	6.76435	6.52474	0	0	0	0	0	0
11174_bclustnum_488_kamer_1_number_1	CTTATTTGGCTAAGCATTGTTGGTATAAGACATGGACTCAAACTTTCTCTAATTAATCCCTTCTACAAAAATTCATGCACTTGTCTGTTAAGTTCTTCATTCTTTGTAGGTGTCAATC	6.59304	6.55593	6.49888	0	0	0	0	0	0	1.09861	1.09861	1.50408	0	1.09861	0	1.09861	1.09861	0	0	0	0	1.09861	1.60944	1.09861	0	0	0	0	0	0
111804_bclustnum_54_kamer_1_number_1	ACGTGAGTTTACATCATTGGCCTCCGATCGAGTGATTCTGCGGGTGTTCGACGTCAACTCATTCATTCGCACGCCGTAGATTGTACCTGTAGAACCTTGAGTACCATTGTAATT	0	0	0	0	0	0	4.25497	4.39445	4.29543	5.99623	6.81194	6.79926	1.34993	1.09861	1.60944	0	0	0	5.38658	5.02806	5.04343	0	0	0	0	0	0	0	0	0
1118_bclustnum_2310_kamer_1_number_1	CCATATATGTAACAACCTAGGTAAGCCTAGTATGTTGTTGATGACTTCCATCATTTCCTGTTACTTTAGAAGGTAAGACCGTCCATATAGAAGTGGAAGTTTTCGATACGCCTCTAGATTATAATTTCTCC	0	0	0	0	0	0	3.96272	3.87536	4.02892	6.38182	6.54506	6.54793	0	0	0	1.90424	0	1.7492	4.17439	4.39938	4.33336	0	1.38629	2.0149	0	0	0	0	0	0
111920_bclustnum_107_kamer_1_number_1	AGACAATACTTATATGATTTAAGTACTACCACCTATTTGATTGATAAAGAGGATTTGATCAAAAGATGTAACAATAGCACCTAGAGGAAAGGTTGAGTTACGATATTAAAAGAATTA	6.85099	6.84849	6.81394	0	0	0	0	0	0	0	0	0	0	0	0	0	0	0	0	0	0	0	0	0	0	0	0	0	0	0
111977_bclustnum_43_kamer_1_number_1	ATTATTATACCCATAACGCTATGCACATCTATAAACATAGACATGATGCATAACCATATTCATAGCCAATTCAACAATTAACATAT	0	0	0	0	0	0	0	1.09861	0	0	0	0	0	0	0	0	0	0	0	0	0	0	0	0	0	0	0	6.51508	6.45873	6.54067
111_bclustnum_365_kamer_1_number_1	TCTACAAATTAATGACTAAAGACGAATACCTGAAGGAGCTTCTCTTCGTTTCGAGAATAAATTATCTCTAC	0	0	0	0	0	0	0	0	0	0	0	0	0	0	0	4.25053	3.73426	4.10146	0	0	0	4.44935	4.27865	4.61229	0	0	0	6.7901	6.78397	6.64732
112000_bclustnum_10_kamer_1_number_1	CGATGTTCATTTCCAAATATTTGCTAATTTGTATGTGTGAATGTTCCATTTGCT	0	0	0	0	0	0	0	0	0	0	0	0	0	0	0	4.33336	4.81218	4.63084	0	0	0	4.30676	4.37952	4.28496	0	0	0	6.68985	6.67431	6.62725
112032_bclustnum_191_kamer_1_number_1	CCCGCATGTGGATGCGGAAACCAAAAATCTGCTCCTGCATTCCCTTTTCCGCTTTACATCATTTACTAAGTCCATCAAGTCAAGCATAACTTCATCAGGTGGTTTGCCATCAA	0	0	0	0	0	0	1.09861	0	0	6.78982	7.72318	7.72255	0	0	1.09861	0	0	0	0	0	0	0	0	0	0	0	0	0	0	0
11213_bclustnum_163_kamer_48_number_2	ATAACACAAAGGTTCATGATCGTTAGTGGTTAAAGAACTAAGTAACATAATCATCATACCTTCTAG	0	0	0	0	0	0	5.31975	5.14943	5.31156	5.97635	6.4892	6.51669	0	0	0	1.09861	0	0	5.56834	5.6881	5.62281	0	0	0	0	0	0	1.09861	0	0
11214_bclustnum_5565_kamer_1_number_1	CGAGAAGGATATTATAACAGCATCTGCATGAGCAAGGAGTCATCAACGTCATACATGATACATCTACGTGAGCTTGGCTTCAATTGAGGTTGTCTCTGGCCATCTGCAGGCTTTCTCAACCACCTGCACT	0	0	0	0	0	0	1.09861	1.34993	1.09861	0	0	0	6.46043	6.55251	6.58801	0	0	0	0	0	1.38629	0	0	0	0	0	0	0	0	0
112211_bclustnum_354_kamer_1_number_1	CAATAGCATGTTGTTTCCTTTGTCTCGTTGGCTTCGTGAAATCGGCTCCTGGGTATATTGTTCACCTCCTCCCCCTTTCGGTTGGGCTCATCAGCTTCGGGTTTTCTCTTTCAGTAGACCTATGACCTTCAATAG	0	0	0	0	0	0	0	0	0	5.9382	7.25871	7.17492	0	0	0	0	1.09861	0	0	0	0	0	0	0	0	0	0	0	0	0
112241_bclustnum_55_kamer_1_number_1	TCAAATGATGTCGAATTACTCCCAGCTACTTCCGAAGAGGAGAAACGTTTATTATACTTATCTCAGTTAGATGAGACTCGACGTGACGCTGCATTGGCAA	1.09861	0	0	1.09861	0	0	6.98897	7.0047	6.98305	2.03688	1.09861	0	0	0	0	0	0	0	5.11319	4.92435	5.0186	0	1.09861	0	0	1.09861	0	0	0	0
112271_bclustnum_45_kamer_1_number_1	TAAGGTCAAGAAGTGGAAGATCACATCGAGAATCAACAACAAATTCTCCATTCCCACACCATAGCTTATGTTCCGAATGCGGTAGTAAAATACAT	0	0	0	0	0	0	5.18066	5.08389	5.27095	5.92158	6.09206	6.17753	0	0	0	7.08516	6.91075	6.92221	5.13462	5.17162	4.89035	7.01401	6.98564	7.00277	0	0	0	1.09861	0	0
112317_bclustnum_68_kamer_1_number_1	AGATCTTAGTGACGTCACTATGCTGCCATTAAGCTATCCTTACTTAATCATACTAGGAACATTAATAAAATGCATAATCGG	0	0	0	0	0	0	4.27667	4.5136	4.57471	6.64066	6.61907	6.55001	0	0	0	0	0	0	4.30068	4.48017	4.19344	0	0	0	0	0	0	0	0	0
11234_bclustnum_3067_kamer_1_number_1	CTATCTCATGGGTAGACACTTCAAGGTAAAAAATGATCATGATAGTCTCAAATACTTTTTGGAGCAAAGGTTACCATCTGAGGAACGATAAAAGTGGGTAACAAAAAGGGTAAAGAAAGGTA	0	1.09861	1.09861	5.94184	6.10581	6.01238	3.70377	3.65325	3.54962	6.4552	6.69109	6.56539	1.09861	0	1.09861	1.81529	1.54045	0	3.28091	3.56671	3.2884	2.36712	1.86075	1.46634	0	0	0	1.09861	1.38629	1.52606
112412_bclustnum_116_kamer_1_number_1	AGCGCGGACAAGGGCCGTCGAGGTCTACGACGTGGCCCGCGATGAGTGGAGGTCCGCCTGACCTTGCAAGTGTAACTTGCTAAAAAGGATTTGCTCCAGATGGACAGATGATCGG	0	0	0	0	0	0	0	0	0	0	0	0	0	0	0	0	0	0	0	0	0	0	0	0	1.79176	1.09861	1.46634	7.0067	7.07391	7.0551
112414_bclustnum_9_kamer_1_number_1	AGGTGAATATGCCTGAGCAGGGCGAAGCCAGAGGAAACTCTGGTGGAGGCCCGTAGCGATACTGACGTGCAAATCGTT	5.0073	4.98018	4.82831	5.85148	5.75574	5.90195	6.09018	6.08336	6.04737	6.65157	7.32053	7.40519	6.81865	6.84322	6.87652	7.14952	6.79794	6.89745	6.63824	6.37161	6.48311	7.16819	7.18652	7.1774	6.70319	6.78559	6.67991	6.18672	6.18312	6.11036
112479_bclustnum_17_kamer_1_number_1	TAGGATAGGTGTGATGGTAACTTCCCTGCAACTAAATAATTAGCAATATCTGCATACCAAGGTGGTGAGCGAAACTGCAAATAAATATTCATCAGGAAAGGAA	1.60944	2.19722	0	0	0	0	5.76582	5.95272	5.84644	6.00191	6.21381	6.22377	1.09861	1.97716	1.71765	6.4825	6.07627	6.14333	6.04216	6.18497	6.23793	6.90776	6.75902	6.87977	3.06339	2.50144	2.3979	2.10413	2.22462	2.42775
112549_bclustnum_33_kamer_1_number_1	AAGAAGGATGCTTTCAAGTGGGATGAAGAGGCTGAAAAGGCCTTCCAAAAAATGAAAGGGTAATAGTAGTTGTCCCATACTTGGACTTCCTGATTTTA	0	0	0	0	0	0	0	0	0	0	0	0	7.27325	7.29912	7.32053	0	0	0	0	0	0	0	0	0	0	0	0	0	0	0
112552_bclustnum_101_kamer_1_number_1	TTTTCACGATTCCTCTTAAGACAAATCTCTTGGCAAATATACTAACTTAAAAGGAACAATGCACCAAGTGGAAGATACATTGAGACGGATTGCAGCCAGATTAGATGCTGTGGAGACAGCCCAGAGGAGAGGAGCGCATCTTGATGATGTAAGTGATGAT	6.74902	6.662	6.62111	0	0	0	0	0	0	0	0	0	0	0	0	0	1.09861	0	0	0	0	0	0	0	0	0	0	0	0	0
112579_bclustnum_37_kamer_24_number_2	CCCAACTCAATTCAAACACACCCAGGCAACCTCCCATCCGTGACAGAGCCAACACGCAGAGATAGGAAGGACAC	8.09521	8.15442	8.07113	1.09861	0	0	4.64759	4.66971	4.19469	0	0	0	0	0	0	0	0	0	0	0	0	0	0	0	0	0	0	3.72167	3.56483	3.74557
11258_bclustnum_2284_kamer_1_number_1	CTTAAGTGCATTCCCCTAAGTTGCACATAAGGGGGGGTGTTGGTGTAAATAAGTATTTACTATTTACACTTACTTAAGTTTATTAGGT	6.78841	6.69363	6.58721	0	0	0	0	0	0	1.09861	0	0	0	0	0	0	0	0	0	0	0	0	0	1.09861	0	0	0	0	0	0
1125_bclustnum_6853_kamer_1_number_1	GTGTGTTTTGTAACCTTTAACAAGGTTGGCTCCTAACAGGGCTCACTTTAGAAGAGTAAAAAACAATAACTAGTTACATCGGTGGGTTTTCCATATG	7.72081	7.73626	7.74841	0	0	0	0	0	0	0	0	0	0	0	0	0	0	0	0	0	0	0	0	0	0	0	0	0	0	0
112660_bclustnum_22_kamer_1_number_1	ACACGGCCGTTTTTGGACGCGTTTATGCACGTCGCTCCTAAACGTCGCACGGTCACCGTGTACCGTG	0	0	0	0	0	0	0	0	0	5.5885	6.59806	6.65071	0	0	0	0	0	0	0	0	0	0	0	0	0	0	0	0	0	0
112672_bclustnum_86_kamer_1_number_1	GGCATAGCCATTCAAGCATATTGGGCACCCCGCAATCTCGCATCTGCATCTCGCAGT	0	0	0	1.09861	1.09861	0	8.12366	7.50514	7.53627	5.6684	6.18071	6.15839	0	0	0	0	0	0	7.70007	7.28264	7.46242	0	0	0	0	0	0	0	0	0
112787_bclustnum_14_kamer_1_number_1	GCTGTTGAATACAGGCTGTGATTGTGGATTATTATCATTATGTACATGACTATATTCATGACTCACTGATTGGATGACTGCGACCATACCTGAGTCTATTTATTTGATCC	0	0	0	0	0	0	3.28091	2.5337	2.73437	5.81114	6.58286	6.6174	0	0	0	0	0	0	5.35973	5.23998	5.0814	0	0	0	0	0	0	0	0	0
112801_bclustnum_62_kamer_1_number_1	TGCACATCATGAGCTCCTCAAAAGAAACTAAATAACCATGATCCTCAACCAAGAAGATGACCTGTT	7.21032	7.21254	7.17166	0	0	0	0	0	0	0	0	0	0	0	0	0	0	0	0	0	0	0	0	0	0	0	0	0	0	0
112826_bclustnum_28_kamer_1_number_1	TCACCACCCCATCGTTCATTTGGCTGATCATTCACTTCCATTTGTGTGTTTACCTCTTTTGAGAAACAGCTGCGAAGAGTGATTTCACCTAGCCATC	1.09861	0	0	1.09861	0	0	6.64999	6.6733	6.68891	0	0	0	0	0	0	0	0	0	1.54045	1.09861	0	0	0	0	0	1.09861	0	0	0	0
11285_bclustnum_1131_kamer_1_number_1	AGGACAAGATACCCAAACTAACAAGACTCCGATCGAGTTAGGGTGAGGGGTA	0	0	0	0	0	0	1.09861	0	1.09861	6.36015	6.71215	6.72423	0	0	0	1.60944	1.09861	1.60944	5.14296	5.01138	4.70753	1.09861	1.09861	1.60944	0	0	0	0	0	0
1128_bclustnum_335_kamer_1_number_1	ATAGATACAACGTGTCTACATAAATAGATATGAACACGATGTACATAGTCTCCAAGGGCAATCCTAACTCATATATGGTCTCACACTTTTCCAATTGGAAATGTCTACTAAATGCATGTTTTAACTAGT	6.64509	6.63426	6.65176	1.09861	1.09861	1.09861	0	0	0	0	0	0	0	0	0	0	0	0	0	0	0	0	0	0	0	0	0	0	0	0
112924_bclustnum_4_kamer_1_number_1	AAACACATCTACTTCATTATTTCTACTCTTATCTACTACATCAAGAGAATTCACAGGTGCTTTTCCTTTATCATTATCTCTTTTACCAGATGTAGAAGCTCTATCTGGACATTATA	0	0	0	6.86133	6.74833	6.7642	0	0	0	0	0	0	0	0	0	0	0	0	0	0	0	0	0	0	0	0	0	0	0	0
112963_bclustnum_67_kamer_1_number_1	GCGTGCAAAGGCACCCGGGCGGTCACAACTTAGCAAATCTGACACGGGCGCCCTCGGGGGAAACGACCCCACCCGAAAGGACGACCTCACCTGGCACGCCCGCC	0	0	0	0	0	0	0	0	0	5.27913	6.64249	6.79324	0	0	0	0	0	0	0	0	0	0	0	0	0	0	0	0	0	0
113070_bclustnum_21_kamer_1_number_1	ATTTTGCTGGATAGGAACTTATACTCTATTTCGTATTTATGAAACATATTATCGGGCAGACCCATTATTAACTGGGAGTTGGCCCTCCCTTGTATGTATGGGCGTACACTGTGGATGTGATGATGACGTTCATGTTTTCCGCACATTGAAGAACA	0	0	0	0	0	0	0	0	0	5.58475	6.54122	6.51787	0	0	0	0	0	0	0	0	0	0	0	0	0	0	0	0	0	0
11309_bclustnum_897_kamer_21_number_2	CCACGATGATTCTATTTGGGCAATTTGTTTAACATCCAGCCTTCCAGATGACTCCAGACCTCGTTGTTGGCCTTGTAAATGTCACCCT	0	0	0	1.09861	0	0	5.73738	5.66988	5.72359	0	0	0	0	0	0	0	0	0	7.21579	7.11396	7.0992	0	0	0	0	0	0	0	0	0
113139_bclustnum_46_kamer_1_number_1	TGTTCAAGATCATTGCTAAAAGAGATTATTGAAAGAGGGAGATTGTTGAGATATGATTGTT	6.6071	6.46614	6.68752	0	0	0	0	0	0	0	0	0	0	0	0	0	0	0	0	0	0	0	0	0	0	0	0	0	0	0
113168_bclustnum_100_kamer_1_number_1	GGTAACCGCCTGGGAGCTATCCTGACAGCTCGCCCTATAGCAGCTTGCCCCAGAGAT	0	0	0	6.61562	6.61651	6.61025	0	0	0	0	0	0	0	0	0	0	0	0	0	0	0	0	0	0	0	0	0	0	0	0
11316_bclustnum_612_kamer_1_number_1	CACGTCAAACGACATTCTATAGTTTGCACATTCATCCGGAAATAAGAAAAGCTTAATTCCACCGTTGTTTAAGGTTGAAGAGAAACCAATCAACCTTGACACTTCATTGTCATCCTGATGTTCAGGTTTCTAATATTTGATGATTTTAGTC	0	0	0	0	0	0	0	1.28093	0	0	0	0	6.28387	6.4044	6.57188	0	0	0	0	0	0	0	0	0	0	0	0	0	0	0
11319_bclustnum_272_kamer_1_number_1	CTCGATGTGATCTTCCACGCTTGACCTTAGATTTTTCTTTTAGAGAAGAAGTGATGGA	0	0	0	0	0	0	0	0	0	0	0	1.46634	0	0	0	6.52356	6.4744	6.40413	0	0	0	7.2912	7.23177	7.30921	0	0	0	0	0	0
113219_bclustnum_32_kamer_1_number_1	GAAAAGATGGTTTAGAGATAACTGCCAAGTGTTCTGGTAGTCCACGAACTCCTAATAATGTGACTAGAACGTCAAAAAATACGATTCCAGTCCAAACAATTAAAAATTATTGGAGATACTCTTTATTGTCGTGGGGCAAACTCTATTTTTCGACGTTATTTGACTATGAGG	0	0	0	0	0	0	5.74038	5.71373	5.68265	0	0	0	0	0	0	1.09861	0	1.54045	7.24286	7.16205	7.11927	0	0	1.09861	1.79176	1.60944	1.32176	0	0	0
113369_bclustnum_88_kamer_1_number_1	ATAGCTTTAAGCCAACTTGAATAAGATATTTAGATCACTGCTACAATGGTTAGAAAGTAACAATGAGATGACCTAACTTTTGATGCAACTAAATTGTTGATTACAGATCTCAATTCTGGCTTGTATGATTGCTCCTTCCTAATGAAA	7.05148	7.07048	7.01674	0	0	0	0	0	0	0	0	0	0	0	0	0	0	0	0	0	0	0	0	0	0	0	0	0	0	0
113379_bclustnum_124_kamer_1_number_1	GAATCATATTCTTCGATCATGGCATCTACCCATGCGAGTTCCTCCATCGCTTCCTCAAAAGAGGATGGCTCCGTCACGACACATTACTCACAGAGCCATGTA	0	0	0	0	0	0	3.03495	3.25037	3.49651	6.22218	6.76435	6.78762	0	0	0	0	0	0	4.81056	4.70592	4.68951	0	0	0	0	0	0	0	0	0
113379_bclustnum_254_kamer_1_number_1	CATATTCTTCGATCATGGCATCAACCCATGCGAGTTCCTCCACAGCTTCCTCAAAATAGGATGGCCCGTCAAACACATTGACTCACAAGAGCCATGTATC	0	0	0	0	0	0	2.4681	2.05412	2.91235	5.83364	6.57088	6.6575	0	0	0	0	0	0	3.57235	3.50255	3.48431	0	0	0	0	0	0	0	0	1.09861
11343_bclustnum_747_kamer_1_number_1	AAGATCTGCACCAGGGGCCGCTCCACCCGGGCTCGCGCCCTAGGCTTCGCAACGACCCCCGCGACCTCCTACTCATCGGGGCTGGCATCGCCCCGATGG	0	0	1.09861	0	1.09861	0	0	0	0	1.09861	1.09861	2.22462	1.60944	0	0	1.09861	1.09861	1.09861	2.22162	1.88031	1.41369	0	0	1.09861	6.60047	6.76427	6.63376	0	1.09861	0
113512_bclustnum_322_kamer_1_number_1	ATTGCACCTCTTGCATCCCAAGAAGGATTAGAGCCCACACACACTACATGCCAAGGACATGCAAGACATCAAACGTAATGGACGCTGGATGACAGTAGCCTCATGATGAAGTGATGGCGAGTGAGCTTCGATCCAACACATGACTATTTC	0	0	0	0	0	0	4.11087	4.34812	4.00733	2.00747	2.03688	1.56398	0	0	0	0	0	0	6.52272	6.53379	6.32308	1.09861	1.34993	1.09861	0	0	0	0	0	0
113565_bclustnum_412_kamer_1_number_1	TTAGAACCCAACCAACACATTCTAGAGAAATCATCAATAAACAGAATATAGTATTGTTCTCCATGGGTTGACCTCTTTCTCATGGGTCCACATATATCAGTATGAATGATTTCA	1.88707	1.09861	1.34993	1.60944	0	0	2.31363	2.42354	2.65324	6.09685	6.58793	6.48241	0	0	1.09861	4.85558	5.03163	5.12774	2.24071	2.26176	2.17475	5.02328	4.85981	4.80327	0	0	0	1.43508	1.60944	0
113607_bclustnum_154_kamer_1_number_1	TATCGTTTCCTCCATAAAATTGACAGAGTGACAATTTTTTTACGGGAGCAAATCCCAATGCTAAGATCGGAGAGCGCGTGTAGGGAAAGAGTGTAGA	0	0	0	0	0	0	0	1.09861	0	6.7617	7.09064	7.14782	0	0	0	0	0	0	0	0	0	0	0	0	0	0	0	0	0	0
113614_bclustnum_232_kamer_24_number_2	GATCTCCAGTCAAGTATGCAACCACAAGCCATTATATCCAACACTCTGTCCAATCACTGTCTTCCGTGGTAGCACAATCAATAGTTAGCAGTGCCACGCAAAAACCTCA	0	0	0	0	0	0	5.57822	5.4161	5.55528	0	0	0	0	0	0	3.13549	1.6864	2.2192	6.61312	6.4151	6.32972	3.01553	2.91235	2.5177	0	0	0	0	0	0
113619_bclustnum_31_kamer_1_number_1	CACTCGGTAGCATATGAGCGGTAATGCTGGCCATGCTTGTCCTTGGAGGCATGTTTGAACAATCTCTCCCGTCCACTCTGTTTTCTAGCAGCATTTGAGATGCCTGGCGCCGCTGGACATAGATCGGACAGGAGTAGTGAC	0	0	0	0	0	0	3.55535	3.3673	3.95124	6.51678	6.78536	6.78649	0	0	0	0	0	0	1.55814	2.07944	2.03688	0	0	0	0	0	0	0	0	0
11366_bclustnum_233_kamer_1_number_1	ACAAATGAAACAGCCGACAAAAATTAAAAACGGCCAGCAACAAATAGAAAAACG	0	0	0	0	0	1.09861	8.15322	8.09908	8.14636	7.87681	8.11316	8.10862	2.16496	2.59026	2.75154	6.64596	6.57971	6.57508	8.10896	8.20446	8.10554	6.60289	6.68475	6.72557	0	1.32176	1.94591	5.76797	5.81546	5.76797
1136_bclustnum_157_kamer_1_number_1	GGGGATTTAATCCTCAATGGGGATTAATCCAATAACAAATAATAAAATGCTCTTCGCAGTTACATTATTTCAACAC	0	0	0	0	0	0	0	0	0	0	0	0	0	0	0	6.41416	6.23916	6.43179	0	0	0	6.75177	6.72229	6.74608	0	0	0	0	0	0
11370_bclustnum_1096_kamer_1_number_1	ATTATGAACTCGGTTTGATTAAATTATGATCGCGAGCATGATTATCGTTCTGTCTTTGACTGTGTAGGGTCCTGTTACCAAATTGCCTAAGT	0	0	0	1.09861	0	0	1.38629	1.09861	0	1.09861	1.09861	0	0	0	0	6.51208	6.40413	6.19644	0	1.38629	1.09861	7.11233	7.09626	7.05512	0	0	0	0	1.09861	0
11370_bclustnum_687_kamer_1_number_1	TGTTTTCAAGTACACAACCAGAACAAACACCATCCCTGCAAGATACCATCGGAAGACCTGTCATCATATTGTCTTTACATAGTTGATGCAATGAGCGATAATTTAAGTGACCAAATCGCTCACGCCAAAGTTTGCTCA	0	0	0	0	0	0	3.80324	3.6064	3.86073	2.90311	2.59983	2.89037	7.1187	7.12417	7.05452	3.07578	2.43899	2.50396	4.99877	4.93779	5.13172	2.66616	2.57769	2.55305	0	0	0	4.3458	4.44626	4.59667
113785_bclustnum_38_kamer_1_number_1	CTAAGTAACTATTAATCTAAATTAATTAAATAAAACTATTTAAAACACATATTGATGCGTCAATTTAGATCGGAAGAGCA	6.6695	6.66441	6.64996	0	0	1.09861	1.09861	0	0	0	1.09861	0	0	1.09861	0	0	0	0	0	0	0	0	0	0	0	0	0	1.09861	0	0
11382_bclustnum_3115_kamer_1_number_1	AAACAAAACTTTTCAAAACAATTTAAAATGTTTTCGATACAATTTTAAAACGGTTTACAAACAAT	0	0	0	0	0	0	7.53102	7.55521	7.58138	0	0	0	0	0	0	0	0	0	0	0	0	0	0	0	0	0	0	0	0	0
11382_bclustnum_44_kamer_1_number_1	ATGTTTTAAGAACAACTCAAAACGCTTTAAAACGGTTTACAAACAATTTAAAA	0	0	0	0	0	1.09861	6.68736	6.63621	6.59769	0	0	0	0	0	0	0	0	0	0	0	0	0	0	0	0	0	0	0	0	0
11382_bclustnum_57_kamer_1_number_1	ATATTAAATGGTTTAAAAACAATTTAGAATGTTTTAAGAACAACTCAAAAC	0	1.60944	1.09861	0	0	0	7.0591	7.10808	7.08924	0	0	1.09861	0	0	0	0	0	0	0	0	0	0	0	0	0	0	0	0	0	0
11382_bclustnum_664_kamer_1_number_1	CAATATAAAATGGTTTAAAAACAATTTAAAACGCTTTAAAAGTTCAAAACAA	0	0	0	0	0	0	7.34769	7.38013	7.37262	0	0	0	0	0	0	0	0	0	1.8718	2.25129	1.94591	0	0	0	0	0	0	0	0	0
113836_bclustnum_144_kamer_1_number_1	CATACATTATTATTGTTATGTAGGCTTGAATTGTAGTCACACCCTTTCATAGCTTTGTGGTGTGTTTCTTGTTGTCGATCTCATTTGCATTATGTTTCTCTAGGATGGTGTCTTG	0	0	0	0	0	0	6.31355	6.17753	6.16163	5.48147	6.27664	6.23832	0	0	0	0	0	0	6.84268	6.88531	6.86213	0	0	0	2.37491	1.79176	2.49674	6.80128	7.07615	6.84482
113877_bclustnum_203_kamer_1_number_1	GTAACTTCGTGAATAGGTAAGGACTAAGAATATTTTTTGTAAGTAACATAGTACATACAAACAATAGATCTAACAATTTCATTTTTACCATTTCAT	0	0	0	0	0	0	6.86427	6.8652	6.7921	3.12457	3.42679	3.4095	0	0	0	0	0	0	7.47566	7.44872	7.39953	0	0	0	0	0	0	0	0	0
113925_bclustnum_221_kamer_1_number_1	CATTTGAACTAGTGTGTATTCTTGATTATAAGGATGATTCTAGCATATTTCACCTAGTTATATTGTATAAAGTAGGGTTACTAGGAACCATATGATTTGTGTCAAATATGCTTTCTTCTGAGTATGAGGGTGAGCTACAAAGTACCAAGGATCAGCTGTCATACCTCTTCAATCCAAATGCAGAGTAACTAACAGA	0	0	0	6.38744	6.44871	6.52584	1.09861	1.34373	1.09861	0	0	0	0	0	0	0	0	0	0	1.09861	0	0	0	0	0	0	0	0	0	0
113990_bclustnum_385_kamer_9_number_2	GAACGGGAAAGGGGCGGGGAGGGGAAAAGGGAGAATTCGGGGGCGCCCGAATCTTTAAAAAAA	0	0	0	0	0	0	0	0	0	6.64596	0	0	0	0	0	0	0	0	0	0	0	0	0	0	0	0	0	0	0	0
114004_bclustnum_89_kamer_1_number_1	ATAAGGTAGGAAAGGATGGGAATCTCTCATCACAAGCTTTACAAGGAAGTTCTAATTCCAACAGCGTCTACCCTTAGGCATGTTCAGCTTTCAACCTCCCAT	0	1.09861	0	0	0	0	5.18291	5.16707	5.16821	0	0	0	0	0	0	0	0	0	7.53037	7.33785	7.40233	0	0	0	0	0	0	0	0	0
114024_bclustnum_36_kamer_3_number_2	ACATGCATCAATCAACACATAACACAAAATATGATGACCCAGAAACCCTCCAGGAATAAGAAGTAAAATGGGGAGGGGATGATACCAGAT	6.6053	6.662	6.70018	0	0	0	0	0	0	0	0	0	0	0	0	0	0	0	0	0	0	0	0	0	0	0	0	0	0	0
11402_bclustnum_2211_kamer_1_number_1	AGATGAGAACTTGGGGATGATGCGCTATTTTCTAGGCATGGAGGTGTGGCAGAGTGCAGATGGAATCTTCCTTGGACAAGGGAAGTATGCAGTAA	1.09861	0	0	2.75684	2.62104	2.11021	1.79176	1.60944	1.60944	1.09861	0	1.09861	6.50711	6.54071	6.55251	0	0	1.09861	2.30259	1.94591	1.76766	0	0	0	0	0	0	0	0	0
11407_bclustnum_172_kamer_1_number_1	TGAAGTGACAAGGAGCAAATGATTTTAATGGAGGTGAAAACGATCTGTCACAGGAGTGCCTTAGTGAAATCCACATCAATGACACAGAACGGAGCAAGCTGTCATAGCAGGGCCTTAG	0	0	0	0	0	0	6.55649	6.43967	6.55706	0	0	0	0	0	0	0	0	0	2.70805	1.09861	1.75786	0	0	0	0	0	0	0	0	0
11407_bclustnum_90_kamer_1_number_1	AGCTGATGTCGACAAGGAGCGATCCGTCAAAGGAGGGCCTTAATGAATACCACATCAATGACACAGAACGGAGCTAATGATTTTACGGAGTGAAAACGAT	0	0	1.09861	0	0	1.09861	7.78489	7.80376	7.84737	1.09861	0	1.88707	0	1.09861	0	0	0	1.46634	4.53689	3.93183	3.61631	0	1.09861	1.7346	0	0	0	1.09861	0	0
114090_bclustnum_54_kamer_1_number_1	TTAGATGTACTCAGAGGGATGTAGAGTATAAGTCCCAAGTGGCCAATGAAGTGAGCAAGGTCTTATATAAGATCCCCACCCTAGTTTTACTTTCTATTTTGGAAGGTTTCTGGGTCACCAAATTATTGTGTTCATGTGCCATGAATGTTTTATT	6.69919	6.6083	6.79094	0	0	0	0	0	0	0	0	0	0	0	0	0	0	0	0	0	0	0	0	1.09861	0	0	0	0	0	0
11409_bclustnum_162_kamer_1_number_1	AGACTATAGAAAGCAGCTACACTCCTATCTTGTTTCAAAAATGCAGACATTCTCCAAATCTTGCCACTTTGGTTG	0	0	0	0	0	0	5.52545	5.61191	5.71227	0	0	0	0	0	0	0	0	0	6.65028	6.58709	6.639	0	0	0	0	0	0	0	0	0
114173_bclustnum_56_kamer_3_number_2	TTGGACCATGAGCGCATACACAATTGAAACAGCAAGTGTTCCCCAACCTCCCA	0	0	0	0	0	0	4.13677	4.20469	3.82428	0	0	0	0	0	0	0	0	0	7.12753	7.03192	6.80128	0	0	0	0	0	0	0	0	0
114214_bclustnum_23_kamer_1_number_1	AACCCATTTGTGAGAAGGAAATGATGGCAATACATGCATTGAAGAAATGGCATCCTTACCTAGTAAGTAGGCACTTAGTTATTCATATCCATATGGGGTA	0	0	0	0	0	0	1.91365	1.51635	1.09861	1.09861	1.20397	1.09861	3.91488	3.6853	3.87417	6.48768	6.22109	6.38568	1.09861	0	2.07944	6.85567	6.97955	7.02808	0	0	0	2.66921	1.52606	1.84583
114231_bclustnum_108_kamer_1_number_1	ACCAACATACACACTATAACCAGTTCAAAACCAAAAAATGGGGGACTTAATAAGGCACCCAACACTACGCACAACGAAAGGCACGTTATCAAGTTGGGAGCCCCAACGCAGGTCCGCAACGCA	0	0	0	0	0	0	0	0	0	1.09861	0	0	0	0	0	6.75422	6.80351	6.37843	0	0	0	5.85125	5.94017	5.83188	0	0	0	0	0	0
11425_bclustnum_2077_kamer_1_number_1	GTGTCCTTGAATCCTCGGCCGGGAAGCGTCTCGGTCGGGGCTGCTTTGTAGGTTAATTTAAAATGGTC	0	0	0	0	1.50408	0	5.39816	5.38092	5.20949	6.07125	6.57197	6.47142	5.86015	5.7393	5.76036	6.2279	6.01534	5.56987	6.49005	6.36857	5.94566	6.45921	6.18447	6.46649	0	0	0	5.97154	5.90111	5.66536
114282_bclustnum_55_kamer_1_number_1	GAGGTTTTGGTCATTTGTATCATCTAATAATTATTCATTTATGTAATGTATTGGAGGTTTACCCCTCGAATTGGTTGATTTCCAAGGCGTTGATCTCTCTTTTATTCTATTTTTGGAGAGATCGGAAGAGCGTCGTGAGGGGA	1.09861	1.60944	0	1.09861	1.60944	1.60944	5.42655	5.40799	5.41043	5.92323	6.70964	6.76357	0	0	0	0	0	0	5.10595	5.17718	5.33272	0	0	0	0	0	0	2.09714	2.27727	2.58669
114282_bclustnum_84_kamer_1_number_1	GAGGTTTTGTAAATTGTATCATCCAAGAATTGTGCATTTATGTAATGTATTGGAGGTTTACCACTTGAAGTGGCTATTTCAAGGCATTAATATCTC	1.09861	0	0	0	0	0	5.21433	5.17866	5.23244	7.68417	8.44273	8.43673	0	0	0	0	0	0	6.21971	6.31052	6.38781	0	0	0	0	0	0	2.15176	1.09861	1.70475
114319_bclustnum_23_kamer_1_number_1	AGGATACAAAGAGGGATACCTTTTTTTATCCAGTTAATAAATCTCAAACAAAAGGGTTAGCACGTTATGAGCATAGGATTGATTTATTAGACGGAAGG	0	0	0	1.09861	0	0	6.94954	6.9344	7.04549	7.28915	7.7486	7.71809	2.56495	2.50144	2.78501	3.3673	3.10608	3.43399	6.65415	6.69662	6.72663	3.82137	2.99573	3.68888	0	0	0	1.09861	1.94591	2.68558
114350_bclustnum_432_kamer_1_number_1	TGGCTCATCGCCCAGGCGCGCCCTCGCTCGACCCGCCTGAACGAGTTCATAAGCATGCCCTCAACTGACACACCGCATCAACGGGAATTATTTTTAATAATAACGATTTGGGTTTTAAAAACTAAATTTATTATAACAGTTGTTTAAATGTTTTAAGAAATGAATTTTTTTATATTTTTTGGGAATATTTACTAGAAATTTTATTA	1.09861	0	0	1.09861	1.09861	0	2.98856	2.60269	2.31677	0	0	0	0	1.09861	0	1.09861	0	1.09861	7.16201	6.87342	7.0282	1.09861	1.09861	1.7346	0	0	0	0	0	1.60944
1144_bclustnum_0_kamer_1_number_1	CGAAGGGGAATCACACCGTTGATGTGCCCCTGCCAAAGATTCCTATCAATGCTCTTACAAATGGTCTCGGTATGCACAGTTATACCAATATGGAATAAGTACAAGCACAATAAGACGGGCCCCACAA	0	0	0	0	0	0	0	0	0	0	0	0	6.58993	6.56565	6.57076	0	0	0	0	0	0	0	0	0	0	0	0	0	0	0
114518_bclustnum_165_kamer_1_number_1	CGAGTCGCCGGCACATTTGCACCCAAGGAGGAGCTCGACTTGGAAGACCGGCGGAGGTGCGCCCCAAGAAACGAGGCCGCCGG	0	0	0	0	0	0	0	0	0	0	0	0	6.4911	6.44612	6.52466	0	0	0	0	0	0	0	0	0	0	0	0	0	0	0
11451_bclustnum_2129_kamer_1_number_1	GATGGAATCTCTGGAAAAGGGCCATGGAAGAAGAAATGGCATCTTTGGATA	0	0	0	0	0	0	0	0	0	0	0	0	1.52606	1.50408	1.60944	5.60947	5.91188	5.96255	0	0	0	6.83152	6.81366	6.84864	0	0	0	0	0	0
11451_bclustnum_607_kamer_16_number_3	ACACACTGCAAGATAACATAGTTGTTGATGGGTGCAACAGCTCTTTGGTTCTGAAAGAGAGAAAAAAATCTAGAGGTCTCTGGAGAGAAGACCATGATGTGGCTTTAGAGGCTC	0	0	0	0	0	0	5.44242	5.54695	5.46345	1.09861	0	1.09861	0	0	0	0	0	0	6.80189	6.66869	6.75492	0	0	0	0	0	0	0	0	0
114532_bclustnum_214_kamer_1_number_1	TGTTAATCATTAGTGTTAATTACTTTTCTATTTTATTTGTTGTGGTAGATGATTGTCCTAAGAAGCAGATTGAAGAGGTTGAAAAGATATTGGATCAAAGAGTTGTAAGAGA	6.56723	6.58755	6.79543	0	0	0	1.09861	0	0	0	1.43508	0	0	0	0	0	0	0	0	0	0	0	0	0	0	0	0	0	0	0
114577_bclustnum_135_kamer_1_number_1	AGGCTGCTCCATTGATTGCGTTGGGCCTGACTCCAGATTGAGTCTCCAACTTCTATCAATTACTCACTTCAGAATCATCAGTTGTTGGAGTTTCATGCGAGGGAGAGTGTTCTTCAGAAGAAGATTCCTCATGTTGG	0	0	0	0	0	0	6.34604	6.23275	6.21168	0	0	0	0	0	0	0	0	0	6.76911	6.73551	6.68682	0	0	0	0	0	0	0	0	0
114611_bclustnum_49_kamer_1_number_1	CTACACAGTTGCATTAGCAAAAAATATTGAGAAAGTGAAGAAGGTACTTGAGAACATATTCTCATTGTGCACCAAACTATGTGATCCCACACTCTTCAC	6.53136	6.57848	6.55251	0	0	0	0	0	0	0	0	0	0	0	0	0	0	0	0	0	0	0	0	0	0	0	0	0	0	0
1146_bclustnum_1445_kamer_1_number_1	GCCAGAAAAATGATAAGTGATGAAGAAGAATGAAGCTTCAACACAGAAGACATGGCGGGACTAAAGAGACTTCCAGCCTACATAAAAAGCAGCATGGGCAACAAG	0	0	0	0	0	0	0	0	0	5.90591	6.99062	6.97915	0	0	0	0	0	0	0	0	0	0	0	0	0	0	0	0	0	0
114707_bclustnum_19_kamer_1_number_1	GATGACACGGTGATGATGTTGAGCATGATGACAATGTTATTATATGATGAATGATTATGATAATGAGGATACGATAG	0	0	0	0	0	0	0	0	0	0	0	0	2.10413	2.30259	1.60944	0	0	0	0	0	0	0	0	0	0	0	0	7.79016	7.80402	7.81169
114724_bclustnum_77_kamer_1_number_1	TGCAATTTTAATTTGCAATTGAAATTCAATTTCAAATTCATGTAATGTCTACCATTAGACGG	0	0	0	0	0	0	0	0	0	0	0	0	0	0	0	0	0	0	0	0	0	0	0	0	0	0	0	6.652	6.74052	6.69126
114776_bclustnum_27_kamer_1_number_1	CACAATTGTGCTGCTGCAGTGTTTGGAGGACCTATCAGATGTGGTGGAGGTGCTCTTCCCAAGTATGGATGAAGATCAGGATGTCATCAAAGAACACC	0	1.09861	0	0	0	1.09861	6.95876	7.09313	7.079	6.33012	6.64538	6.62081	3.70267	3.54898	3.63466	5.4269	5.42299	5.01434	7.29037	7.20183	7.16627	5.62	5.55167	5.71006	0	0	0	0	0	0
114776_bclustnum_43_kamer_1_number_1	GGTCATGCCAAAAGTTCACTTCTCCAAATTGGCGCACAACTTGTGCTGCTGCAGTGTTTGGAGGACTTGTCGGATGTGGTGAAGGTGCTCTTCCACGT	0	0	0	0	0	0	2.49412	1.09861	2.26868	6.68475	7.06959	7.09681	1.69459	1.94591	2.56495	3.99104	3.74557	3.80171	4.53021	4.2658	4.06617	4.1812	4.05468	4.05082	0	0	0	0	1.09861	1.09861
11478_bclustnum_1066_kamer_1_number_1	CGGTTAATACCCTAGGACTTACGTGAGCATATCATAGAAATAAATGGCGTAACGAAATGTTACGCTCGGCCAGAGTTGCAGAGGCGAATGCAGTGCAGAG	0	0	0	0	0	0	0	0	0	0	0	0	0	0	0	0	0	0	0	0	0	0	0	0	6.53843	6.63568	6.53059	0	0	0
11479_bclustnum_476_kamer_1_number_1	AAGGACAGCACATGTCAATAGTCGCATGTCTTCATCTTCATTCAGTGGGTTGCCATCAGGACAA	0	0	0	0	0	0	0	0	0	6.36188	7.07355	7.07722	0	0	0	0	0	0	0	0	0	0	0	0	0	0	0	0	0	0
1147_bclustnum_1205_kamer_1_number_1	AAGAATACTTCAAAAGAAAATAAGCATGAATGGAATGCAATTTTCAATGAAGAATATCGAAAAATGAGCAAGAGGTTTCTAGTTGAAATCATACTTGAGCCATCATTATATATTACTTTATAATTCTTCATGTTTCTATAT	0	0	0	0	0	0	0	0	0	0	0	0	0	0	1.09861	0	0	0	0	0	0	0	0	0	2.22462	2.11021	2.48491	6.84827	6.8742	6.96343
114824_bclustnum_28_kamer_1_number_1	TATCTCCTTGGGGGTGTAAACCCTCTTACTCTTCAAGGCAAGCAAATGCTAAGCAAGGAGGTACTAGGAGGGGGTAAGCGCTTTGACTTGGAGCTATGAACCAGTGAGGCCACAAACGGGGGACCTCATCCCCATTAGATTTGAACCTTATGGCA	6.79526	6.92177	6.81257	0	0	0	0	0	0	0	0	0	0	0	0	0	1.09861	1.09861	0	0	0	1.79176	1.54045	2.33537	0	0	0	0	0	0
114867_bclustnum_157_kamer_1_number_1	ATGGTCTAAAACAGGCTACTAGAGCATGGACTCCAATTAGATAAGTATCTGCAACAAGCAGGGTTTAGAAAAGGAAGTGCAGAAAGAAACCTCTACATCAAGGTAAGTCAAGGT	0	0	0	0	0	0	0	1.09861	0	0	0	0	0	0	0	7.03519	6.96577	7.02003	0	0	0	6.87533	6.86835	6.87664	0	0	0	0	0	0
1148_bclustnum_714_kamer_1_number_1	AGCTCATTATAGAAAAGGTATGGTAGATAGCAATCAATATTGGAAAGAAACTAATGATGGTTTGATGATTTTGGTAATATTTGTTGATGACATTATATTT	6.93964	6.90133	6.88653	0	0	0	0	0	0	0	0	0	0	0	0	0	0	0	0	0	0	0	0	0	0	0	1.09861	0	0	0
114955_bclustnum_9_kamer_1_number_1	TTGGAATTAATTTAGGGGTCTACAAAAACTCTAACTTCCGCAGATTATATCTTTGAAATTATAGTGAGACACGATCTAAAATTCGAAATCAAGGTTCAGACGGATTTCTTCTCAAATGGGTTTTT	0	0	0	1.09861	0	1.09861	6.96177	6.89213	6.92166	1.94591	1.09861	2.19722	0	0	0	1.09861	0	0	6.1334	6.14311	6.18826	0	0	0	0	0	1.09861	0	0	0
1149_bclustnum_447_kamer_1_number_1	CTTCAAATTCCTTGTTGTAAATTCTCACCATTATCTGTCCTCAGTACCTTATCTTCTTCTCTGTCTGATTTTCCACCAGAGCCTTAAATTCT	1.09861	0	0	0	0	0	6.846	6.89647	6.85353	5.68848	6.70863	6.61963	1.09861	0	0	2.88418	2.11021	2.02438	8.08733	8.00537	8.15149	3.68888	3.16758	3.37588	0	0	0	1.5506	1.09861	0
115048_bclustnum_74_kamer_1_number_1	ATATGAAGCACCGAAAGGTCATCATCTTTGTTGATAGTGGCAGCACCCACAACTTTATTCATTGCCGCATCGCCCAAGAAACCCATTGCTATATCCTTGCTGTTAATAATTTCCAATGGTGGCTCTATAAATGG	0	0	0	0	0	0	1.94591	1.09861	1.94591	0	0	0	1.09861	1.50408	0	7.06685	6.87288	6.80874	0	0	0	6.51229	6.5085	6.4954	0	0	0	0	0	0
11511_bclustnum_160_kamer_1_number_1	TGTGTTTAGCCTTTAACAAGGTGACATTCCAAGTTGAATGTTCTAAAGTCTTTTAACTAGACACACTCCTAATAGGGTGTTGAAATCCTTTAGCAGGGTCACATCTAACAGGGTATTGAAAT	6.60702	6.59789	6.66869	0	0	0	0	0	0	0	0	0	0	0	0	0	0	0	0	0	0	0	0	0	0	0	0	0	0	0
115154_bclustnum_720_kamer_1_number_1	TTTCAATATTGTGGTTGAGAAACAAGGGGAGGGGTTTATGGAGTGCCCCTCTACCGTGATGAGGTTCTTCTGGCTCCCGCTGTCGATAATGAACTGCAACGGGGAACCCTTTACCCACATCTTGGAATGGAAGAGCAGC	0	0	0	0	0	0	3.2581	3.13549	3.25381	3.04452	3.00815	3.23868	1.50408	0	1.60944	6.50146	6.10007	5.96928	3.57422	3.4889	3.09608	6.26758	6.2967	6.28434	0	0	0	1.09861	1.09861	0
1151_bclustnum_7586_kamer_1_number_1	GTCTTGATAACAAGCACAATGGTTACCCTTGGCAGAATGGCGGTATAACACTTCCTTTCACACTGCAACAAAAATGACACCATTTATGGCACTTTA	0	0	0	1.09861	0	1.09861	3.95124	4.05612	4.05178	4.15888	3.71357	3.42589	0	0	0	6.7549	6.6747	6.72263	3.95124	3.93183	4.17439	7.50323	7.54711	7.61308	0	0	0	2.16905	1.38629	1.32176
11522_bclustnum_297_kamer_1_number_1	TAACTTAGGGTTTGGGGAGTAGAGAGATCAGTGAGTGCATTCAGGGAAATGAAACCATGAATAAAATTGTGGGTGCTTCCACTATCGACGATAATGATGACTTTCAAGTTCTTAATGTAGGCAATTAACTT	0	0	1.09861	0	0	1.09861	7.77001	7.72046	7.75061	0	0	0	2.19722	1.60944	1.94591	3.96081	3.5601	3.4012	6.32257	6.24649	5.78383	3.3673	3.36153	3.70541	0	0	0	2.28238	2.05412	2.92316
11523_bclustnum_314_kamer_5_number_2	CCATCACCTAAGAACCTTCTTATCAATATCAACCCCAAGGTCAACCTCNNGAGAGG	0	0	0	0	0	0	0	0	0	0	0	0	0	0	0	0	0	0	6.65801	6.71052	6.25575	0	0	0	0	0	0	0	0	0
11523_bclustnum_939_kamer_1_number_1	GGCGTGCGAGAGCTTTTGTCCTCAAGAGAAACAAGCTCGAGACCCAATTCTTTATACCCTGACCTCATAGAGACTGTATTAAGACGACAAGGAGCATACAACTTTGATACCACTGATCTAGATTTTATGAGAAGAATGAAATGAATATAGATTATTAA	0	0	0	0	0	0	2.83321	2.66259	3.11352	1.52606	1.79176	2.24071	5.51209	5.54335	5.48539	6.72343	6.62016	6.59003	2.53017	3.43399	2.33537	6.29095	6.33115	6.33399	0	0	0	3.42968	3.60317	3.5601
115247_bclustnum_32_kamer_1_number_1	GACTCTCTTGTTTGTCCCTTTATCTCACCCCCACACATACCCACACTCTCTCCATATCTCCCTTGTCACACCACATCTCTCT	0	0	0	0	0	0	3.69511	3.77849	3.88156	5.50939	6.82193	6.69301	0	1.09861	0	0	0	0	3.66995	3.22883	3.19867	0	0	0	0	0	0	0	0	0
115254_bclustnum_153_kamer_1_number_1	CCTTTGTCATAGACTGGTTCCAATGTAGAGGATCATGCCTTCTTTAAAAATTTCATAACCTTCATCAAGAGACAATTCAAGTTCCTCTTCCACCACA	0	0	0	0	0	0	0	0	0	0	0	0	7.38695	7.42331	7.44406	0	0	0	0	0	0	0	0	0	0	0	0	0	0	0
115282_bclustnum_51_kamer_1_number_1	TCTATACGTCCTCAGAAGTTTCAACCAATCTTTCTCTATACCAGAGAAGTCACACGTCAAACCGGATGTGTTATCCTTTTAGCAAGTTAC	0	0	0	0	0	0	0	0	0	0	0	0	0	0	0	0	0	0	0	0	0	0	0	0	0	0	0	6.39266	6.50212	6.37085
115348_bclustnum_8_kamer_36_number_2	TGCACTAGTGGTAATGGTATTCAAGAAAGATAGCTCATGGTGTATGTGTCCAGATTATAGAGAGCTCAACAAATNNNN	1.09861	1.09861	1.94591	0	0	0	3.01694	1.94591	3.01226	2.89037	2.92674	1.09861	2.81626	3.08453	3.3771	6.3924	6.15243	6.34086	2.68558	2.89828	2.79902	6.75577	6.78591	6.739	0	0	0	3.05804	3.12299	3.6853
1153_bclustnum_3256_kamer_1_number_1	TGAGGAAGATCAAGAGAAACATATAACTGAGAATGAGAAATCATAACAAGAAGAAATAACCCGGGGAAAGTCTCAACCTGTTG	0	0	0	0	0	0	6.32525	6.41469	6.42365	0	0	1.09861	0	0	0	0	0	0	6.57751	6.53124	6.65189	0	0	0	0	0	0	0	0	0
1153_bclustnum_4692_kamer_1_number_1	TAGTTCTCCAGATTTGGGGCTTTTCTGATATTTTCTCCCTCATGTCATTCCTGCATCACCTCGTTGATTGAGAATGCCAATTGTATACCACTTGTACCAATTGCACAT	0	0	0	0	0	0	0	0	0	6.85245	7.58822	7.52218	0	0	0	0	0	0	0	0	0	0	0	0	0	0	0	0	0	0
11540_bclustnum_778_kamer_1_number_1	TCGTTAGGTTGTGATGAGTGAGTCATGGCACAAATCTATTAAAGAGGATGAAGATAATGCTTCCATTAGATCG	1.09861	1.60944	1.60944	0	1.60944	1.94591	6.81454	6.6053	6.52909	1.60944	0	0	0	0	0	0	0	0	0	0	0	0	0	0	1.09861	1.09861	1.60944	0	0	0
115416_bclustnum_104_kamer_1_number_1	ACAATGAACTTAATCGCACATCATAGCAACATTTGAATACAATACATATAACCTGTGTTACGAATTAACAGATCCGGAACAATTTAAGAATAAACAGTTAAATGCAGAAACAAAAGAGGAAAACCATAAGA	6.70042	6.7511	6.62141	0	0	1.09861	0	0	0	0	0	0	0	0	0	0	0	0	0	0	0	0	0	0	0	0	0	2.60796	2.3979	2.60796
115440_bclustnum_31_kamer_1_number_1	ATTAAATAAATAATATATTTAATTAAATGTTTACATTCATTTACATGTGGACTGGCTATTTTAATCATAAGATTGGTAATA	1.09861	0	0	0	0	0	0	0	0	1.09861	0	0	0	0	1.09861	1.09861	0	0	0	0	0	0	0	0	0	0	0	6.82111	6.80711	6.83492
115497_bclustnum_32_kamer_1_number_1	TTCACACAAAAACATCGCAACATTCTGAAAATTATCACTGTGGTGTGGTCTGAAGAATTAAAAGCCCTAGTAGTGCCGTTCATGAGTTCAAGAGAAGTTGGCATCTGCAAATATCAACCTTCCTCTGTTTCTCATACAATCCTGATTCACA	0	0	0	0	0	0	1.09861	0	0	6.37502	7.1804	7.20299	0	0	0	0	0	0	1.60944	1.52606	1.84583	0	0	0	3.22883	3.03255	3.11352	0	0	0
11550_bclustnum_70_kamer_1_number_1	CATATATGGTCTTTTTGCCAAACTTCCACTCATCATTTCGGGCGCTCCGGGTGAGGGTTCCAGGCCAAACGTGTTCGGGTCAGGTCGGGTCGTTCGGTCGTGCCAGGTGCGGGCGTCCGTTCGGG	0	0	0	0	0	0	0	0	0	5.32579	6.57879	6.61368	0	0	0	3.02529	3.33932	3.18635	0	0	0	3.83298	3.25037	3.48431	0	0	0	0	0	0
115569_bclustnum_45_kamer_1_number_1	TTTAATTAATTGAGAAATTAATGAAATAAAAAAATTAAAGTTTTAGTAAAAGTCTAATTTTGAGCGTAATAATATATTTAAGAGTTCATTTTTAAATAAATGCTAAATATTATTACT	6.99134	6.97414	6.95629	0	0	0	0	0	0	0	1.09861	0	1.09861	1.38629	2.19722	0	0	0	0	0	0	0	0	0	0	0	1.09861	0	1.09861	0
115589_bclustnum_14_kamer_22_number_2	ATGGAAAACTGGGAGTACTCGTGAAGATGCAGGAAACTCCAATTTGTATGCCATACTATCGAACGTTATATCACCTGTAAGGCCTATGGGACTATGCTT	0	0	0	0	0	0	5.19434	5.30165	5.20126	5.0626	4.91998	4.99496	1.09861	1.43508	1.82455	6.9176	6.84102	6.88744	5.16859	5.35344	4.77912	7.06827	6.99993	7.019	0	0	0	2.94444	3.29584	3.23475
115615_bclustnum_81_kamer_1_number_1	TAATCTCCATCAATGTGTGTGCAAATCTCATGCACAGCCAATAGTCACAACTAATAGTAGACTCACCCTATCACCCACCTCTAACACTGGTCCCACTG	0	0	0	0	0	0	1.46634	1.09861	1.09861	6.12905	6.61636	6.51669	0	0	0	0	0	0	0	1.09861	1.09861	0	0	0	0	0	0	0	0	0
115621_bclustnum_34_kamer_1_number_1	TTATTTTATTTTGAAGTCCCTTTTTTAACTCTAAAAAACATATGGTGCAGTTTCCGTCAAAAACGTATATGAAAATCATCTTTTTTGTTCTG	6.67442	6.64567	6.6969	0	0	0	0	0	0	0	0	0	0	0	0	0	0	0	0	0	0	0	0	0	0	0	0	0	0	0
11568_bclustnum_833_kamer_6_number_2	GCGCATGGTTGAAGAAATGTTAGAGGCTGGCATCATTAGACCTAGCAAAGTT	0	0	0	0	0	0	1.09861	1.09861	1.09861	1.09861	2.15176	0	3.33932	3.10009	3.3673	6.86464	6.57619	6.64873	0	0	0	7.65283	7.64674	7.60917	0	0	0	2.78501	2.00148	2.05412
115753_bclustnum_19_kamer_1_number_1	TCATCCTTTAAATTAAACTCTATCTTTCCTGGTTCTTCCTTACTTGGTAGGACTTCCTGTTTATCAACATCCTTCATTTTCTAAAACCACATCTCGACTATACACTACCT	0	1.09861	0	0	0	0	0	1.09861	0	0	0	0	0	0	0	4.88432	5.25123	5.1023	1.76766	1.60944	2.07944	7.01499	7.03351	7.12093	0	0	0	1.09861	0	1.09861
115798_bclustnum_29_kamer_4_number_3	AAGTAATTTTGACATTCCCATATTTGAGGGTCAAATAGACGCAGATGCCGTAGATAGATGGTTGCATCTGTTAGAAGG	0	0	0	0	0	0	6.81591	6.86459	6.87446	7.44746	7.50673	7.45081	1.94591	1.09861	1.09861	2.54553	2.16905	0	7.30165	7.23616	7.17816	3.4095	3.14631	3.2581	0	0	0	0	0	0
11579_bclustnum_1116_kamer_1_number_1	TACCTTGTAAAAGGGCAACTGTAGGCCTGTGATTGCATCATGAGTTAGAATAAAAGAAAGCTTTTTGTC	6.95623	6.99342	7.05742	0	0	0	0	0	0	0	0	0	0	0	0	0	0	0	0	0	0	0	0	0	0	0	0	0	0	0
115804_bclustnum_66_kamer_6_number_2	AAACAAAGCAACAAAAAACAGATATATGCAATCTTACCGCTTGTTAGTACTTCATG	0	0	0	0	0	0	6.72914	6.76207	6.7561	2.83321	2.59525	2.66259	3.04452	2.86627	3.3474	5.77233	5.44612	5.46685	7.62217	7.39835	7.51511	5.65249	5.66643	5.69853	0	0	0	2.10413	2.70805	1.52606
115917_bclustnum_12_kamer_1_number_1	TGTCACTGCATGTAGACAGGAGAGCCAAAGATCCACAAATATTCCAACCTCAGCGGTTGGATCTAGCTTCCTTCTTGAATCCTTTGTCAC	0	0	0	0	0	0	0	0	0	5.52457	6.70537	6.74589	0	0	0	0	0	0	1.43508	0	0	0	0	0	0	0	0	0	0	0
11595_bclustnum_50_kamer_1_number_1	CTTGAGTTATTAGTTGGAGAAAATCAAACATGAAGCCTATGTGACGACATGCGACAGTTATCCCATTGATTGAGGAATCTATCCCTTCGTTAAAGAGACAAGGTGTCCAGTCAGGAGAGTATATGGCCCATGCTGTAGCAACGAGACTTTGCAACCATTGAGATGTACTGTCAACGAACCCATGGTGATAATCAGGCAGAAGA	0	0	1.09861	0	1.09861	0	6.38697	6.39674	7.0591	0	0	0	0	0	0	0	0	0	6.27039	6.6549	6.59427	0	0	0	0	0	0	0	0	0
115964_bclustnum_24_kamer_1_number_1	TGGAGTTGTGTTCTGTTTATTTTAGTTGAACTGATTGAGATTAGTTTAACTAGCTAATCAATTAGTTATGAGTGGGTGAATA	0	0	0	0	0	0	0	0	0	5.85865	6.89619	6.84162	0	0	0	0	0	0	0	0	0	0	0	0	0	0	0	0	0	0
115_bclustnum_0_kamer_1_number_1	GTCTTATACCATTTCAACTACTCCGGTTATCGCTGGCGACTCCTTCGAGATGGACGCCGTTGGCGCTCTCCGTCTTTCTCCATTGCGTCGTGGCCTTGCTATTGACTCTACTGTAGACATTT	0	0	0	0	0	0	0	0	0	0	0	0	0	0	0	0	0	0	0	0	0	7.85328	7.83149	7.52923	0	0	0	0	0	0
115_bclustnum_1054_kamer_1_number_1	TGGCGATCCTTCGAGATGGACGCCGTTGGCGCTCTCCGTCTTTCTCCATTGCGTCGTAGCCTTGCTATTGACTCTACTGTAGACATTTTTACTTTTTATGTCCCTCATCGTCACGTTTATGGTG	0	0	0	0	0	0	0	0	0	0	0	0	0	0	0	0	0	0	0	0	0	6.58318	6.59053	6.30688	0	0	0	0	0	0
11600_bclustnum_4040_kamer_1_number_1	ATCTATATATCACTATACCAGCTATCTTGTTTAACATGTATGATGAAATGTTTTTAAATTTACTTGCATGATTATTATAAATTTCTGTCCAACACTCGAGAAG	0	1.09861	0	0	0	0	6.94235	6.83217	6.86066	0	0	0	0	0	0	0	0	0	6.45614	6.39693	6.57786	0	0	0	0	0	0	0	0	0
116128_bclustnum_280_kamer_3_number_2	CTCTGTTAAGAACAAAATATCAATATAGCATAGAAATCCTCAAAAAAGTACTCAACGCCTT	0	0	0	0	0	0	0	0	0	0	0	0	0	0	0	6.17517	6.63638	6.49778	0	0	0	6.34739	6.4324	6.39415	1.09861	0	0	0	0	0
11613_bclustnum_861_kamer_1_number_1	TGTGCATATCTGGTATTGTGCACACCATGGAATACATCAAGATGCCAACTGCTGATTGATAGGGAATCTTGGGCATGTAATCTGTCTCTTCTTATGGC	0	0	0	1.09861	0	1.09861	0	0	0	0	1.09861	1.09861	6.95156	6.96508	6.90475	3.86888	3.33616	3.62878	0	0	0	3.97029	3.91867	3.78166	0	0	0	0	1.09861	0
11619_bclustnum_669_kamer_1_number_1	ACCTAGAGCTATGGCTACATGTGATCCCTCATCCCACCTGGCTCGAAGTTTCCCCCTCCTCCTTAGAACAATCACTCTATATCACCCCAGCACCTACCTAGACGCAGCAGTGAGTTCCAACGGGACAAG	0	0	0	0	0	0	5.66064	5.67789	5.68079	0	1.09861	0	0	0	0	0	0	0	6.7072	6.52035	6.46047	0	0	0	0	1.09861	0	0	0	0
11621_bclustnum_57_kamer_3_number_2	ATACCGTTTTAACATTACTTCTCCATTAATGTGACTACATGTGAAGAAATCAAAACATAGATATCCAATTTGTC	0	0	0	0	0	0	0	0	0	0	0	0	0	0	0	0	0	0	0	0	0	0	0	0	0	0	0	6.90904	6.9896	6.98193
116231_bclustnum_25_kamer_1_number_1	CAGCCTCAAAAAGACCAGATCCCCTTCTTGAAAGTGGCACTCTGAGCGATGCTGGTCTACCTGTTGCTTCATACGATTCTGAGCTTGATGAAGATGGGCGAGATAGTTCGCAGTGTTGTAGGAGTTGAGCCACTACTTGTACCTTAGAG	0	0	0	0	0	0	4.95583	4.80986	4.97575	1.09861	0	0	0	0	0	0	0	0	6.7981	6.59207	6.45901	0	0	0	0	0	0	1.09861	1.09861	0
116233_bclustnum_47_kamer_1_number_1	CCTTAGCTCATCTCCCTCCGAAACAGGAACTTCTTCACTCATGCAGATGATCAATCCATCTTCTTATGTAAGGCCTTAG	0	0	0	0	0	0	0	0	0	0	0	0	6.68479	6.632	6.70808	0	0	0	0	0	0	0	0	0	0	0	0	0	0	0
116263_bclustnum_16_kamer_1_number_1	TCTACAAATAGTACATCTTGGGCCTTTCCTCTGCCATTATCTATGCTGACCGAGCCTTTTCCCTTGATCTTACCTGATTTATCATTACCAAAAATAACATTGCCAGATTTCTTTTCACAAGAGTA	0	0	0	0	0	0	0	1.09861	0	6.01778	6.57018	6.52111	0	0	0	0	0	0	0	0	0	1.09861	0	0	0	0	0	0	0	0
11627_bclustnum_141_kamer_1_number_1	AGAGAGATTCTTCCTTTTATACAACAAGGTTCATTGTTACCAAATCTTACACTCCCACCATCATACTCTTCAAAGTATTCAAACTGGTTTT	6.67161	6.60138	6.62731	0	0	0	0	0	0	0	0	0	0	0	0	0	0	0	0	0	0	0	0	0	0	0	0	0	0	0
1162_bclustnum_1188_kamer_1_number_1	ATAACCCCAGGTTACATTATTCCGGGCCGACCCCTCTACTAGGTGGTCTAATAACCCATCAGCAATTACACACTTGCGACACTTGTCAATACAAATGACGACACT	0	0	0	0	0	0	0	0	0	0	0	0	7.92414	7.92783	7.96221	0	0	0	0	0	0	0	0	0	0	0	0	0	0	0
1162_bclustnum_2170_kamer_1_number_1	CCCTTAACCCACATGACTTATACCGGGCCGACCCCAAATAAGGTGGTCTAATAACCCTTTGACCCACCTGACTTA	0	0	0	0	0	0	0	0	0	0	0	0	6.45047	6.45273	6.5586	0	0	0	0	0	0	0	0	0	0	0	0	0	0	0
116412_bclustnum_18_kamer_1_number_1	ACTCACTCTCGACGTGAGTATGATAATCTTTATTTGCTTCTTCAATGGAAGACTGAAGAGAACAAATTTCCTTAGAGATGGAGCT	0	0	0	6.48812	6.46792	6.50193	0	0	0	0	0	0	0	0	0	0	0	0	0	0	0	0	0	0	0	0	0	0	0	0
1164_bclustnum_90_kamer_1_number_1	CAAGCCATCCAAGCATATCCTAACCTATCTTAGCCTACTCTACCTATACTCGCCTACCCTATCCTAGCCTAGCC	0	0	0	0	0	0	2.60796	2.06142	2.12026	3.97567	5.2933	5.00011	0	0	0	6.47411	6.60839	6.84997	2.31677	1.54045	1.09861	4.85091	4.87301	4.73243	0	0	0	0	0	0
1164_bclustnum_928_kamer_1_number_1	GCCTACCTACCTATATTAGCATATCCTAACCTATCTTAGCCTATCCTAGCCTCCTCTACC	0	0	0	0	0	0	1.09861	0	0	0	0	0	0	0	0	6.43348	6.5615	6.69043	0	1.09861	1.50408	3.34404	2.89037	3.3673	0	0	0	0	0	0
116593_bclustnum_238_kamer_1_number_1	GGTAAAATATATGGACTTCTATTTTTGGTTAATAGCAGAGTGATCAGATTCTATT	0	0	0	0	0	0	5.54752	5.43721	5.59024	6.14633	6.632	6.59987	0	0	0	0	0	0	3.91602	3.56671	3.88362	0	0	0	0	0	0	0	0	0
1165_bclustnum_8567_kamer_1_number_1	ACCAAACATCATTCTTCATGATAGAGGTGTACCCACCAGGAATCCCTGCAAACCAATTGGTCGACTACCTCCTAAAAATTGGGGGGCTCGTAATCAA	0	0	0	0	0	0	5.35422	5.0093	5.54908	5.70877	6.47235	6.63463	3.29584	3.16407	2.89653	2.70805	2.83321	3.43399	5.96871	5.96615	6.01981	3.00568	3.61092	3.55535	0	0	0	3.78419	4.12713	3.82428
116604_bclustnum_432_kamer_1_number_1	GGTCTTAAAAAATTCAATGGAACTATCACCGTGTTAGAGGATTTACAACTAGCTATTAAACCAACTCTATTAAGAGATTTTAGATCACTGCTAC	6.61428	6.58218	6.6053	0	0	0	0	0	0	0	0	0	0	0	0	0	0	0	0	0	0	0	0	0	0	0	0	0	0	0
116693_bclustnum_35_kamer_1_number_1	ACCAATTCCGGGAGTGTTCCTCCTAACATCAGGCGATACAGATACCCTTATGCCCAGAAGAGTGAAATTGAGTG	0	0	0	0	0	0	0	0	1.5506	0	0	0	0	0	0	6.34589	6.24417	6.27045	1.09861	0	0	6.90073	6.89785	6.80951	0	0	0	0	0	0
116769_bclustnum_125_kamer_1_number_1	CATAAATATGGATTAACCGAGAGTTTGATTCAACTCTAATTATCCAAGTGTGAACTGAACAACCCGACCAGGATCTTCCCCGTCCTCCGATAGATTTCATTGTTGTAAACAATTTATGTACACTTGTTTGTTAAAAGATCGGAA	0	0	0	0	0	0	4.69501	4.4822	4.77912	5.59259	6.62373	6.67045	0	0	0	0	0	0	4.89463	5.02256	4.86907	0	0	0	0	0	0	1.60944	1.60944	1.09861
116770_bclustnum_46_kamer_1_number_1	TGGAATGTGAAGGTGATTTGTAAGGCCAAAAGGCATGACCAAAAATTCATA	1.09861	0	0	2.35138	2.67415	2.28238	8.857	8.85135	8.85043	8.79855	8.5368	8.59781	4.09101	4.2683	4.33336	8.6048	8.545	8.59241	8.58437	8.62977	8.64143	8.75208	8.73716	8.76471	0	0	1.52606	6.43133	6.32185	6.32472
116796_bclustnum_102_kamer_1_number_1	AAAACTTAAAGCTCACATCTATTGAAGGAAATGAATTTGTATATCTTGAACCATGGAGACTCCTCCCTGCAAGTTCTGGAAGAATTCGAGGAGATGTCGTGTCATATCCTTGCAACCAG	0	0	0	1.09861	1.09861	0	7.35628	7.36169	7.33954	4.61016	4.87137	4.71402	0	0	0	2.53017	1.60944	1.56398	7.88552	7.6	7.6748	2.67798	1.81011	2.35665	0	0	0	0	0	0
116809_bclustnum_67_kamer_2_number_2	ACTGATAAGGTGGACACTTTGAAGAATCTTGTAGACTCATTGACAAAATCTGTGAGCTCTG	0	0	0	0	0	0	7.46756	7.42417	7.45143	4.66344	4.50719	4.41078	0	1.52606	1.60944	2.81341	2.36712	2.90872	8.15316	8.14119	8.14361	3.13549	2.56495	2.61496	0	0	0	1.79176	2.05412	1.60944
116817_bclustnum_7_kamer_1_number_1	CATTGAAACATAACGCAAACATCTAGAGGCCTAAGCTAGAGACGTTTTCGGCGTCGTTAAACGTGATATCTTAGTGTTTCTGTGTTATGATTATTGGTTACGCTTATGGTATCTCTGTACTATA	0	0	0	0	1.09861	0	6.78813	6.74905	6.83087	1.60944	1.3633	2.66921	0	0	0	0	0	0	1.46634	0	2.15948	0	0	0	0	0	0	0	0	0
116989_bclustnum_14_kamer_1_number_1	TCTTTGGTTCTTTTCACTGACTCATAAAAAATGAAAAGTTTGCCGAGCTTTGGCCTTCCAGCTCGTTAAAAGACCGGAAAGCTATCCCTCCTCTAAA	0	0	0	0	0	0	6.53846	6.53363	6.62907	0	0	0	0	0	0	0	0	0	1.86075	2.41789	1.97716	0	0	0	0	0	0	0	0	0
116998_bclustnum_72_kamer_3_number_2	GCCCTTGAGAAACTGGCCGGTCGCCTATGTCGGTCTCGTGCCCCTTGCTCGCTCGTTGGCTCCGTCGAGATCGG	0	0	0	0	0	0	0	0	0	6.10511	7.04938	7.05211	0	0	0	0	0	0	0	0	0	0	0	0	0	0	0	0	0	0
116_bclustnum_0_kamer_1_number_1	GTAAACTAGTGCCATGCTCAGGAACAAAGAAACGCGGCACAGAATGTTTATAGGTCTGTTGAACACGACCAGAAAACTGGCCTAACGACGTTTGGTCAGTTCCATCAACATCATAGCCAGATGCCCAGAGA	0	0	0	0	0	0	0	0	0	0	0	0	0	0	0	0	0	0	0	0	0	8.38925	8.3531	8.09677	0	0	0	0	0	0
116_bclustnum_1_kamer_1_number_1	GCGAAAACAACAAGCGCAAGAGTAAACATAGTGCCATGCTCAGGAACAAAGAAACGCGGCACAGAATGTTTATAGGTCTGTTGAACACGACCAGAAAACTGGCCTAACGAC	0	0	0	0	0	0	0	0	0	0	0	0	0	0	0	0	0	0	0	0	0	6.6673	6.56999	6.31799	0	0	0	0	0	0
117041_bclustnum_124_kamer_1_number_1	TTCACTTAAATTAGCCAAAGATCTCAATTGCTTTGTATATCCAGCGACAGAGTTTCAAGTAATGATTGCAGATGGAGGAACTATCAATT	1.09861	0	0	2.56495	1.60944	1.94591	2.52573	2.12026	2.14007	1.09861	1.5506	1.94591	5.85952	5.93107	5.92158	8.45794	8.44125	8.4782	2.35138	1.6864	2.13163	8.60457	8.59697	8.65167	0	0	0	4.77539	4.88532	4.85636
117108_bclustnum_108_kamer_16_number_2	CTGAACCCTTTTGCTTGAGATTTATCAATTGGCTAAAGAAGGTATTGCTCCTGTATC	0	0	0	0	0	0	5.1358	5.09579	5.19666	5.46946	5.42935	5.57215	2.4681	2.43361	2.15176	5.47367	5.69036	5.7225	4.72444	4.89035	4.83628	6.99546	7.03644	7.01212	0	0	0	1.94591	2.00148	1.94591
117196_bclustnum_20_kamer_1_number_1	ACCATCAAAAACCAATACAAGGGATCCAAACTGGGGTTCAATAATTTATATCCTATACCACGGTCCAAAACCATAGGATCATGAACGACGGGCTAAATTATATC	0	0	0	0	0	0	6.7438	6.73768	6.79409	0	0	0	0	0	0	0	0	0	5.58725	5.34901	5.54674	0	0	0	0	0	0	0	0	0
117219_bclustnum_159_kamer_1_number_1	AATGATGAGGTAATACTACTGTTTTATATATTTAAATTTATTCTAACATGTTCTTTAACTTGTTTTTATTAAATTGTGTAATGAAATTGT	1.09861	1.09861	1.09861	0	0	0	0	0	1.09861	5.10189	6.85283	6.78307	0	0	0	0	0	0	0	0	0	0	1.38629	0	0	0	0	1.09861	1.7346	1.09861
117230_bclustnum_55_kamer_1_number_1	TGTAATGAAATTATTCTTAGAAGAGATGTTAAACTTGATGAAAATATCTTCGACTGTGAGCCTAATTCGGCGGGTGTGCCTTCTTCAGGCTGCAGGCA	0	0	0	0	0	0	0	0	0	1.42139	0	0	2.93119	2.37491	1.8718	7.00277	7.13489	7.10432	0	0	0	6.71861	6.74511	6.72236	0	0	0	0	0	0
117283_bclustnum_35_kamer_1_number_1	GTCCGAATATGAAGGTATTCATCAAGGTCAGCATTGGAGCAGAAAAGTTTTTATCTGTCATGTCAAGGACAATCAGAGCATAAGCGGATCTTATCAGTAATCAGTTGTATTCAGATCAACTGTTTCATTA	6.5648	6.493	6.54391	0	0	0	0	0	0	0	0	0	0	0	0	0	0	0	0	0	0	0	0	0	0	0	0	0	0	0
11729_bclustnum_607_kamer_3_number_3	GCAGGTGTTCGGGTGAACTCGTTCAGGCGGGGCGCGCGAGGGATCAACCTGTCGAGGGAC	0	0	0	0	0	0	0	1.09861	0	0	0	0	0	0	0	0	0	0	8.31041	8.00147	8.23898	0	0	0	0	0	0	0	0	0
11730_bclustnum_6787_kamer_15_number_2	ATTTTTATTTACGTAGAAGTGTGGTGTAGCAAGGAAGAAGACTACTCCATACACACC	0	0	0	1.09861	0	1.09861	6.05303	5.82107	6.03596	6.46511	7.0934	7.13966	5.01728	4.87825	4.73444	5.39059	5.29998	5.33914	6.02506	6.12832	5.99894	5.79118	5.84238	5.52013	0	0	0	1.94591	1.52606	0
11734_bclustnum_166_kamer_1_number_1	AAAGGGGGAAAAGGGGAAGATTTCGGGGGGGCGCGCATCATTAAAAAAAAAAAAGCGCAAGCAGACGAGAAATGCACACTAGCAGAGCA	0	0	0	0	0	0	0	0	0	8.48097	0	0	0	0	0	0	0	0	0	0	0	0	0	0	0	0	0	0	0	0
117399_bclustnum_726_kamer_1_number_1	CAATAACAATAAATATGTAAAATCTGCAATAACTATACAACCAAGCCTCCATAAACCAATTTGCTTC	0	0	0	0	1.09861	1.09861	0	0	0	6.38133	6.71226	6.63913	0	0	0	0	0	0	0	0	0	0	0	0	0	0	0	0	0	0
1173_bclustnum_1089_kamer_1_number_1	AGTAGCCATCCAAGCAATTTGAACCTGAAGCGCACATTGGGGAGACCTCGGTGAGAACTACACAAACTTTTAAGTTTCCCATTCCTGTCATTGATGAATTGTTAGATGAAATACATGGAGCAATCT	0	0	1.60944	1.09861	0	1.09861	7.07946	7.03468	7.11613	4.23893	3.60187	2.75154	5.03044	4.59848	4.64118	6.18621	6.13412	6.11736	7.03389	7.25982	7.19168	6.5648	6.56761	6.45938	0	0	0	5.61069	5.65249	5.76623
117426_bclustnum_54_kamer_51_number_2	AATAACCATTTGAGGTCGAGACAGATCCCTCTACTATGCATTGGGGTGATCCTTA	0	0	0	0	0	0	6.37024	6.37843	6.42357	2.3979	1.09861	1.09861	0	0	0	1.60944	0	1.09861	7.12303	6.96923	6.90314	1.09861	1.09861	0	0	0	0	0	0	0
11742_bclustnum_188_kamer_1_number_1	CAATCGAACAAAGAACCATTCTTTACTGCGAGTCTATCATCCAAATATACCTTCGGCTCCGATATCATTTGTTAGAGAATTAAATATTCAGAGGATGAAACACATAAAATATGCGGAAAATACAAGCACACTAAAACACA	0	0	0	0	0	0	1.09861	1.38629	1.55814	6.11351	6.65465	6.5961	0	0	0	0	0	0	1.46634	0	0	0	0	0	0	0	0	0	0	0
11742_bclustnum_826_kamer_1_number_1	GTAAACTGTGTCGAAACTGAAATAGACAATGGTGGAGCCCCAAGTGGAATAGGCGGGGGACAACCCATAATCAACCGGCTCCAGCTCTGCCTTTGCTACCTTACTATTGCAAACCGGGTGGGTTGGTTACTACTTCCACTTAGACATCAATGGACTTTTCCCCTTTAGGCTATGCATCTTCAATGAAGAGATTCATCAGTAAGTTGT	0	0	0	0	0	0	1.09861	1.09861	1.09861	6.53298	6.93561	6.6575	1.09861	1.09861	0	1.09861	0	1.09861	0	0	0	1.09861	1.09861	0	0	0	0	0	0	0
117471_bclustnum_5_kamer_1_number_1	ACCCGATCCTTGTAGCGAAGAACCTCATCCTCCAAGATAGTCATATGAGATCGG	1.09861	1.09861	1.09861	1.09861	0	0	1.09861	1.82455	0	5.78494	6.65948	6.69615	2.16496	1.09861	3.03082	1.09861	1.52606	0	2.6288	2.16496	2.16496	1.94591	0	1.75786	0	0	0	0	0	1.09861
117486_bclustnum_159_kamer_6_number_2	TTAGTAGACTTGCTATGAAGTACGACTTGTAGGATGTATCACATTCCATATTCACAATCAGAACATTGAATTGGC	0	0	0	0	0	0	0	0	0	0	0	0	0	0	0	0	0	0	0	0	0	0	0	0	0	0	0	6.47587	6.51809	6.43133
117506_bclustnum_10_kamer_1_number_1	AACATGTAAAGCACTTTAAATCTTTCTAAATTGCTCTTAAGGCATTTAAAGATGTCCTTGAAACATCTTAAACTTTTTGGGAACCATTTTA	0	0	0	0	0	0	7.93168	7.93868	7.97426	0	0	0	0	0	0	0	0	0	0	0	0	0	0	0	1.09861	0	0	0	0	0
117523_bclustnum_188_kamer_1_number_1	GGGTTGCAGGGAATTTTTAAGAGACGTCGTGGGGTCGGTTGCTCTCCCTATATTTGCTTTCGCATCGAGGTCGCCGCAGGCGATGGGTGCCGA	0	0	0	0	0	0	0	0	0	5.83967	6.66512	6.67918	0	0	0	0	0	0	0	0	0	0	0	0	0	0	0	0	0	0
117547_bclustnum_200_kamer_1_number_1	CTAATCTTCCGCCTTGCCGCTTCAGCTTGAATTTTCCACATCCGACAATTTTGGCCTTCCTATCATCCCTAATAAGACATCACCACCATCATATTTCAGATCGGAA	0	0	0	1.09861	0	1.09861	6.17545	6.19726	6.15952	5.70111	6.04311	5.99745	0	0	0	0	0	0	6.90855	6.87606	6.86797	0	0	0	0	0	0	0	0	0
11759_bclustnum_5150_kamer_1_number_1	TTATTAGGAATTCCATATGCTAGAGTGAATTTTCGGGGTAGTGTAGACTTAGTTCTCCCATTGGACATTCAGTGGGATGTGTCACGT	0	0	0	0	0	0	0	0	0	6.76215	0	0	0	0	0	0	0	0	0	0	0	0	0	0	0	0	0	0	0	0
1175_bclustnum_767_kamer_1_number_1	AAACACATTTTCTAAAAATTCGTGTTTTTTACGAAATCGTGTAAACCTACTAAAAGCAGTGATTTAAAAACGGTGGAAGTAAGCTTTTCTTATTTCCG	0	0	0	0	0	0	0	0	0	0	0	0	7.35521	7.33585	7.33164	0	0	0	0	0	0	0	0	0	0	0	0	0	0	0
1175_bclustnum_9163_kamer_1_number_1	TCTACCAATCAGGAGGCAATGATGAATCCCCACTGTCGATAGCGAAGAGTCTGCCACTGATGACTGCAAACCCTACGGTACTGACAAAACAACTCTAGACCTTATTCCCAAAGCAATGAGTCAGAGTTGATGGGAAAAGATCTGCTGAAAGAAGGC	0	0	0	0	0	0	3.72328	3.75185	3.48781	5.77559	6.79369	6.76504	1.09861	0	0	0	0	0	4.23023	4.34381	4.22635	0	0	0	0	0	0	1.09861	1.94591	1.52606
117639_bclustnum_12_kamer_6_number_2	AGGAGGATATCCAGGATAACCTAGAATAGGATTGCATTGGAATCATATTACCCCCC	0	0	0	0	0	0	3.73767	3.72569	3.77276	3.10009	3.16969	3.08191	0	0	0	0	0	0	6.54917	6.44604	6.3087	0	0	0	0	0	0	0	0	0
11770_bclustnum_110_kamer_1_number_1	TGGCGAATTCAATGACTTTTGCAGCGCAGAAGGAATTTGAAGAGAGCTCATAGCACTTCATAACCCACAGCAGAACGGGGTTTCTGAGTGGAAGAACAGAGCGATCGTGGGTGTCGCACAGTCGGAACGCGTCGTGTAGGGAAAGA	0	0	0	0	0	0	5.01396	5.05943	4.99537	5.65549	6.59373	6.64336	0	0	0	1.53393	0	0	6.00717	5.84306	5.7996	1.09861	0	1.35812	0	0	0	1.09861	1.09861	1.09861
11770_bclustnum_201_kamer_1_number_1	CAGAACGAATTCGAAGAGAGCTCATAGCACCTCATAAGCCACAGCGAACGGGTTTCTAAGCGGAAGAACAGAATGAT	0	0	0	0	0	0	4.24645	4.41539	4.25053	6.7739	7.23778	7.27824	0	0	0	0	1.09861	1.54045	4.34751	4.83515	4.43928	1.09861	0	0	0	0	0	0	0	1.09861
117711_bclustnum_334_kamer_1_number_1	TGAAAGCTAAAAGAATATACATATGTAGAAATACAGGTAAAAGCACAAACCTGTGTCACCTTTTATAAAGAAACGTGATATCAGAATGCGACAGTTCAACATTAATGACAAAA	6.5233	6.49979	6.46671	0	0	0	0	0	0	0	0	0	0	0	0	0	0	0	0	0	0	0	0	0	0	0	0	0	0	0
117783_bclustnum_123_kamer_1_number_1	GAGCACTGAAGCAGCCTCAATGCATAGGAAATGGGAGGCAACTTAGGAGTCCACCCGGACAGCAACAACAATGGACCTCGATCGCATGAGCAC	0	0	0	0	0	0	2.48491	2.36712	2.83321	4.80947	5.38297	5.50398	0	0	0	0	0	0	7.08794	7.26653	7.09233	0	0	0	0	0	0	0	0	0
11778_bclustnum_152_kamer_1_number_1	TTTTAAGAAATTATGTAAACCTTCTAGAAGCTGTAATTTTATAAAACAGTGAAAGTAAGCTTTTTTTTATTTCCGGACGAATGGGAAAACATAGAA	0	0	0	0	0	0	0	0	0	0	0	0	6.91296	6.90341	6.88426	0	0	0	0	0	0	0	0	0	0	0	0	0	0	0
11778_bclustnum_216_kamer_1_number_1	AAAAACTCGTGTTTTTTAAGAAATCATCTAAACATTCTAGAAGCTGTGATTTTAAAAAAAGGTGGAAGTAAGCTTTTTTTATTTCCGGAGAATGC	0	0	0	0	0	0	0	0	0	0	0	0	6.71377	6.74537	6.75344	0	0	0	0	0	0	0	0	0	0	0	0	1.09861	0	0
11778_bclustnum_344_kamer_1_number_1	GTAAGCTTTTTATTTCCGGACGAATGCGCAAACTATAGAAAGTCGTTGTTACGTAGAATGTGCATACTTTTTTTA	0	0	0	0	0	0	0	0	0	0	0	0	6.54062	6.54021	6.52817	0	0	0	0	0	0	0	0	0	0	0	0	0	0	0
11778_bclustnum_367_kamer_1_number_1	ATTTTAAAAACAGTGGAAGTAAGCTTTTTTTATGAAATCATGTAAACCTTCTATAAGCTGTGATTTTA	0	0	0	0	0	0	0	0	0	0	0	0	6.73017	6.74339	6.69509	0	0	0	0	0	0	0	0	0	0	0	0	0	0	0
11787_bclustnum_93_kamer_1_number_1	CATCGGCAAGTACACACACTTGCGACATTTCCTTATAGAGGAATAACACATATCTTATAAGGGACAATAATATATATGAAATACATAGATGAAAT	0	0	0	0	0	0	0	0	0	0	0	0	6.52389	6.42234	6.49778	0	0	0	0	0	0	0	0	0	0	0	0	0	0	0
1178_bclustnum_5670_kamer_1_number_1	CAGGAGGCTTTGCAACAGAGTTTGAAATGAATGACATGGATTTTATGCACTACTTTCTAGGCATCGAGGTGTGGCAGAAATATGGTGAAGTATTTGTGCCTCAAGGCAAGTATGCCAATGAGAAC	2.64696	2.46385	2.49674	2.78501	2.89541	2.63906	5.72467	5.76936	5.77352	1.91959	2.02094	2.33537	1.09861	1.94591	2.14007	0	0	1.09861	6.80628	6.5951	6.59487	1.09861	0	1.09861	0	0	0	0	1.09861	1.09861
11790_bclustnum_134_kamer_1_number_1	ATTCCTGTTTTTTCAGCTCAATCTAATGAAGATGCTTCTTCTTTCATTCAAGAGTTTAAACGATCTTGTATTTGTAATTTCCTCATAAGAAGGGAACAATGGACTGAATTTTTTCCTACCTTTTTGGATGGACAGCACT	0	0	0	6.58681	6.49259	6.54546	0	0	0	0	0	0	0	0	0	0	0	0	0	0	0	0	0	0	0	0	0	0	0	0
117944_bclustnum_30_kamer_1_number_1	GCCTGCCGAAGGGAGGGCACACGTTCCCAAAGTAGCGCACGCCTGCCAAACGGAGGGGGCAGTCGGAA	0	0	0	0	0	0	0	0	0	0	0	0	0	0	0	0	0	0	0	0	0	0	0	0	0	0	0	6.64292	6.81601	6.73221
117945_bclustnum_164_kamer_1_number_1	TTAGAATCTACACAAGGGTAACCATTTGAACCATTGTGTTTGTTTATCAGAGACAAAGCAACGAA	0	0	0	0	0	0	4.15575	3.88362	3.68051	3.97781	3.93183	3.88362	1.50408	0	0	7.56285	7.54944	7.61612	4.23989	3.60005	3.3673	7.47836	7.54009	7.51225	0	0	0	1.52606	1.43508	1.60944
117_bclustnum_324_kamer_1_number_1	TCGGGAGGGTAGTCGGAACCGAAGAAGACTCAAAGCGAACCAAACAGGCAAAAAATTTAGGGTCGGCATCAAAAGCAATATCAGCACAAACAGAAACAACCTGATAGCGGC	0	0	0	0	0	0	0	0	0	0	0	0	0	0	0	0	0	0	0	0	0	6.85579	6.77547	6.5131	0	0	0	0	0	0
118002_bclustnum_36_kamer_1_number_1	TCCAAATGGAAACTCTGCAAGTACTCAACCGACTTCATATGTCTCTGATTCAATTTTTGTTGACTTCCCAAGTATTGTAAATCTCTATGATAAATATACAACACAAAATCCTTA	6.66984	6.69849	6.78538	0	1.54045	1.09861	1.09861	0	0	1.60944	1.94591	2.19722	0	0	0	0	0	0	1.52606	0	0	0	0	0	0	0	0	0	0	0
118048_bclustnum_142_kamer_1_number_1	TACAACAATGTGTCCATTGATCGTACTTTTGATTCAATGGATTTTTTCCTAGGTTTTTGAGAGTGTGTCATACCACTCTTACTGATCCCATATTCTTAT	0	0	0	0	0	0	6.38519	6.40605	5.7607	0	0	0	1.09861	0	0	0	0	0	6.86589	6.66122	6.71841	0	0	0	0	0	0	0	0	0
118162_bclustnum_27_kamer_1_number_1	ACAAACCTTCCTATGGACGTAGCCCATATTTTGGGTGAACCACATATACCTGGCGAAATAGTCTATGACTGATAACATGCAAGGGCAGAGTAACTAGCTCAATCCCCTTGAAGGCTCCTTGCATGTTATAGATCGGAAGAGCACA	3.44999	3.43399	3.3322	3.11352	2.89037	2.60269	5.83188	5.8076	5.58379	5.83919	5.68358	5.49071	2.5337	2.15176	2.65324	0	0	0	6.71323	6.42781	6.50612	1.09861	1.52606	0	1.09861	1.50408	2.07944	3.59883	3.50988	3.24519
118167_bclustnum_37_kamer_1_number_1	ATACTCTCCAACCAATCAAATCATCCTCGATACTATTAAATCCTTTAATTAATATCAGGCCCGCCCATGTTATCCATCCACCCATGGAATTTACTCATGAGATCGGAAGAGCGTCGTGTAGGGAAAGAGTGTAGATCTCGGTG	1.09861	1.09861	1.09861	1.09861	1.09861	1.60944	4.00369	3.70377	3.92746	6.42527	6.98082	7.03015	0	0	0	0	0	0	3.25037	3.3419	2.78501	0	0	1.09861	0	1.09861	0	1.09861	0	0
118199_bclustnum_116_kamer_1_number_1	AAACTAGCCTAATATCATCACCCCAAACTTCAAAGACAATATCCATCTTTGTACATATTGGAGAGATCCCTCTACGGATTCCGCACGCATCCTCCTCA	0	0	0	0	0	0	0	0	0	6.27476	6.74081	6.72773	0	0	0	0	0	0	0	0	0	0	0	0	0	0	0	0	0	0
118245_bclustnum_26_kamer_1_number_1	GATCTTATAAGCAATTGTCTTACCAAAAAATAACAGGTTTGACATCTGTGACAAAATTGTTGGAAATGATTGAAAAGATCATTGATAGAAGAATGATGGAATTGGTAAAGATGTTTT	6.69804	6.74855	6.6703	0	0	1.60944	0	0	0	0	0	0	0	0	0	0	0	0	0	0	0	0	0	0	0	1.09861	0	0	0	0
11828_bclustnum_132_kamer_1_number_1	AGGGACGTGGGCGTAGGTTTAGTAAAAGATTCTGGTTAACTAGGAACTTTTCCATTTCCTCGAATCCAAGAAGTGTCTTCATTTGCGTCCATTCATATGATTACGTCAGATACCATACTTATAAGATCCTTGGGTTGTCCCTTCCAAATATGAGGTAGACTCA	0	0	0	0	0	0	1.38629	0	1.09861	0	1.09861	1.09861	0	0	0	0	0	0	6.81527	6.62105	6.78589	0	0	0	0	0	0	0	0	0
11828_bclustnum_85_kamer_1_number_1	CTCCAACCACGAAGTGTCTTCATTTGCGTCAATTCATATGATCACATCAGACACCATTGTTTATGACGATCCTTGGATTGTCCCCTCCGAATCTGAGATAGACTCATTTGGTAATGCCATGCCTTTGAGTCCATAT	0	0	0	0	0	0	5.95842	6.09357	6.08695	0	0	0	0	0	0	0	0	0	7.61803	7.53603	7.43915	0	0	0	0	0	0	0	0	0
118290_bclustnum_78_kamer_1_number_1	CTTTCACCACCGAATAGTCCTCTAAGGTTTGTTAAGGCACAACCCTCAAAACCCCCAATATTGGGCTCACTAGCTAGAAGCAGAAACAAAATAAGAT	0	0	0	0	0	0	0	0	0	0	0	0	0	0	0	6.42811	5.95785	6.0599	0	0	0	6.73749	6.7886	6.87144	0	0	0	0	0	0
118322_bclustnum_56_kamer_1_number_1	TAATGATGACTGGGAGGATTATCACACTGATTACTAAGGAAGATGTCATTACACTAACATCCCCCCCTGAATGACCACTTCCCACATTCCTAGCAGG	0	0	0	0	0	0	0	0	0	0	0	0	0	0	0	0	0	0	0	0	0	0	0	0	0	0	0	6.51866	6.61219	6.50412
11839_bclustnum_1248_kamer_1_number_1	AGGCAACACCCTTTGCAGTTTTGAAATCCAACTTACCGCTGTTCCACCAACAGTAAAGACATACCCTGTAGTGCTCCTGCTGC	1.09861	1.09861	0	0	0	0	1.55814	1.81529	1.60944	1.09861	1.09861	0	0	0	1.09861	0	1.55814	0	2.52573	2.83321	2.27727	2.54553	1.09861	1.90954	0	0	0	6.62936	6.68555	6.65897
11839_bclustnum_819_kamer_1_number_1	CCGATGATGGAGACTAGCTTAGGTATCTTCCCTTGGAGGCTCTCATTATTATGTTACATTTATTTATGAAGCAACTAGAAAAGTATGAGTTTATTTC	6.77853	6.84529	6.64336	0	1.09861	0	3.41773	3.53889	3.59731	2.70805	3.3673	2.8184	5.68396	5.69298	5.77282	3.77659	3.56797	3.22772	4.47734	4.29046	4.40807	3.57422	3.50988	3.33616	0	1.09861	0	4.05468	4.1396	4.05082
118476_bclustnum_32_kamer_1_number_1	CATAATAGAAGATTTTGAATAGCAAAATATTCTAAGGTTACTATAAATGGACAACTCAGTGGCAA	0	0	0	0	0	0	1.09861	1.09861	0	0	1.50408	1.09861	7.11648	7.15955	7.07937	0	0	0	0	1.60944	0	0	0	0	0	0	0	0	0	0
118517_bclustnum_162_kamer_1_number_1	GTAGACACACCCGGAATTAGCTCTGCAGCTTGGGTGCTTCATTATCCATTCGGTTAGCTGTT	0	0	0	0	0	0	0	0	0	6.33564	7.25284	7.25174	0	0	0	0	0	0	0	0	0	0	0	0	0	0	0	0	0	0
118521_bclustnum_69_kamer_2_number_2	TGTCATGCATTGCACCAAGCTCTTGGAGCTTATCTCAAACCATACAAGGCTTTCTTCAATCTGTA	1.09861	0	1.38629	2.19722	1.09861	1.94591	4.01458	4.04305	3.94481	0	1.60944	1.60944	6.97448	6.97759	6.93472	2.42775	2.36712	2.30259	3.73767	4.1239	3.82864	3.20275	3.09104	3.56483	0	0	0	4.03719	4.19971	4.10429
118525_bclustnum_94_kamer_25_number_2	ATGATTTTAAATCCCAAAGCCTATAACCAAATTCATCAATGTCATAACCA	7.37638	7.31469	7.4118	1.09861	1.09861	1.82455	0	0	0	0	0	0	0	0	0	0	0	0	0	0	0	0	0	0	0	0	0	0	0	0
118539_bclustnum_57_kamer_1_number_1	TTCAAACTCAAATTTTTCCACATTTTTGTTGGAAAACCCAAATTCTCCATTGGAAACCCCAAAT	0	0	0	0	0	0	0	0	0	0	0	0	0	0	0	0	0	0	0	0	0	0	0	0	0	0	0	6.5935	6.46873	6.62804
11855_bclustnum_260_kamer_1_number_1	GAAGTTACTTAGGAACAACCCTTTTAGTACTTTGAATCTTGGATGCCTCAATGGCAAGTTTCTCACTTCCGGTGATAGGTTTACATCA	0	1.09861	0	2.22462	1.50408	2.22462	9.563	9.57446	9.55593	2.16905	2.2882	2.52573	0	0	0	3.07137	3.18399	2.47293	9.06462	8.99197	8.95325	3.62624	3.7744	4.03803	0	1.70475	1.09861	1.60944	2.3979	2.19722
118600_bclustnum_19_kamer_1_number_1	TATATTTTCTCACTAGATTGCCTAACAGGGGTGAGCACCTGTCTCTATTCGGGCTTAGGCCAGGTGGTCAATCCCTTGCTAGCCTCCGGCTTGAGTGGTGCAACGATCATAACCAGGAGAGTGGA	0	0	0	0	0	0	3.65419	3.31584	3.69567	0	0	0	0	0	0	0	0	0	6.90759	6.86607	6.67245	0	0	0	0	0	0	0	0	0
118648_bclustnum_128_kamer_1_number_1	GTTCCCTCCTTTCGAGGATACAGTCCGATTCCGGAGCAGAGTTCCCTGTCTTGTGCCAAGCTCCTTAAAAAATGAAACAAGGTATCCTAGGATA	0	0	0	0	0	0	5.41101	5.70331	5.48716	6.90188	6.66786	6.68586	1.94591	2.3979	1.94591	1.09861	0	0	6.34939	6.20398	6.17274	1.09861	0	1.7346	0	0	0	2.14007	1.60944	2.14007
118662_bclustnum_108_kamer_1_number_1	AACCCTCCAGCCAAGCCGGTCACTTCAGCAATAAGCTCCTCGTTGACCAAGATCTTCTACCCCCCATATTCCAC	0	0	0	0	0	0	6.70613	6.7525	6.73602	6.02924	6.04121	6.06935	0	0	0	0	0	0	3.88362	3.99514	3.79324	0	0	0	0	0	0	0	0	0
118672_bclustnum_3_kamer_10_number_2	AATCAAAATTAACTTCACACCAGACTGAAATGGAGATGCACATGCTTTACAATCACTCATTTTAAAGCGATCAAGTAAATCTGAAGCATACTTAGGCTGCGAAAGA	1.09861	0	0	0	0	0	0	0	0	0	0	0	0	0	0	0	0	0	0	0	0	0	0	0	0	0	0	6.90975	7.0365	6.99979
1186_bclustnum_74_kamer_1_number_1	CCCATCAGTTACTAGACTAATATCTTTGATCCTAATTGGTCAGCTCACCTCATTGAGAAAATACCTTGAGTCTGACCGGAGAGACCCTTCTCCTTCCTCGTAGGGCTAGCTATGAGGTGTAATGGTTTGA	0	0	0	0	0	0	5.59223	5.48618	5.71428	3.66356	3.78872	3.94739	0	0	0	0	0	0	6.77041	6.66356	6.69291	0	0	0	0	0	0	0	0	0
11872_bclustnum_1772_kamer_1_number_1	GACGAAAATTCTATTTTCAAGAACTACTCTTCGACCACCCACGCACTAATTACGATCTGACTTGTGTGTCGGCCCATATGTCCCAAGCATTGCAGTCAACGCTCTTCCGATCTTAAATGAATCGTATCAAAAGAACT	1.09861	1.09861	0	1.09861	1.09861	1.09861	1.09861	0	0	6.57647	1.09861	0	0	0	0	1.43508	0	0	0	0	0	1.50408	1.94591	1.25276	0	0	0	0	0	0
11881_bclustnum_408_kamer_1_number_1	TTATTCAGTAGCCGAAAGATTCCAGATGCATTGTAAATGGTAGTTGTTTT	0	0	0	0	0	0	0	0	0	0	0	0	6.99233	6.95345	7.02019	0	0	0	0	0	0	0	0	1.09861	0	0	0	0	0	0
118855_bclustnum_25_kamer_1_number_1	AGACAAGCATAGATGAGACATTCTCACCAGACCCCACTCCTAGCATGGTTCCCACCACACCATCATAGCCATTGGAGATTCGAACTGTCCCCCCACT	0	0	0	0	0	0	0	0	0	5.87292	6.79395	6.83595	0	0	0	0	0	0	1.60944	0	1.09861	0	1.09861	1.09861	0	0	0	0	0	0
118857_bclustnum_0_kamer_1_number_1	TATCGCTCTATTCCCACAATCTCACCCGTCACCACCATCCCCCCTATATATGTTGATTGGGTCAGGCCCCCCCAAACCATCCTACACCCTTAAAAATATACGACTGGA	0	0	0	0	0	0	0	0	0	0	0	0	0	0	0	0	0	0	0	0	0	0	0	0	6.34914	6.80617	6.30262	0	0	0
118857_bclustnum_3_kamer_1_number_1	CACCACCATCCCCCCTATATATGTTGATTGGGTCAGGCCCCCCCAAACCATCCTACACCCTTAAAAATATACGTACTGGAGGACTCGCTCTTGAGGGCGATTCGAGT	0	0	0	0	0	0	0	0	0	0	0	0	0	0	0	0	0	0	0	0	0	0	0	0	6.17045	6.59796	6.20334	0	0	0
118900_bclustnum_181_kamer_1_number_1	CACTTCATTTTAGCTTCCATGCCTTTCTTCAAAACTTCCACGCCATCCATTTCATAGATCGGAAGAGCGTCGTGTAGGGAAAGAGTGTAGAT	1.60944	0	1.09861	1.50408	0	0	2.02438	1.8718	2.60269	6.13243	7.53182	7.55486	0	0	0	0	0	0	2.25129	2.30259	2.67415	0	0	0	0	0	1.09861	0	1.09861	1.09861
118900_bclustnum_495_kamer_1_number_1	GCCTTTTTCAAACTGTCCATCTTCACTTCCACGCCATCCATTTTAGCTTCCATGTATTCTTTTAGATCATTCTTCATGTTTTCCATGCCTTTC	0	0	0	0	0	0	2.70805	2.83321	2.4681	6.31937	6.61993	6.62229	0	0	0	0	0	0	2.5123	2.56495	2.52573	0	0	0	0	0	0	0	0	0
118964_bclustnum_206_kamer_1_number_1	ATAAACCACAAAGATTAGTCCAAGCACACAAGAGGGTGCTTCAAACCCTCCTCAACAAGGGAGGAAAACCCAACCAAATCCTTTGCTATATTCTTCGAGAGAAAGACATAAACCCTAGAACTCTAGCGACCAAGAGAGGTCTTGCGATACTAAGATAAAGTTTGATGACAATACTATTCTCTTGTTGCTGAAGTTGAGGAAGGTTGTAGG	0	0	0	0	0	0	0	1.09861	0	0	0	0	0	0	0	6.34036	5.6646	5.65507	0	0	0	6.88262	6.66549	6.6918	0	0	0	0	0	0
118_bclustnum_0_kamer_1_number_1	ATGGTACGCTGCATGAAGTAATCACGTTCTTGGTCAGTATGCAAATTAGCATAAGCAGCTTGCAGACCCATAATGTCAATAGATGTGGTAGAAGTCGTCATTTGGCGAGAAAGC	0	0	0	0	0	0	0	0	0	0	0	0	0	0	0	0	0	0	0	0	0	7.75429	7.63377	7.4178	0	0	0	0	0	0
118_bclustnum_1_kamer_1_number_1	TCTAAGAGTTTTACCTCCAAATGAAGAAATAACATCATGGTAACGCTGCATGAAGTAATCACGTTCTTGGTCAGTATGCAAATTAGCATAAGCAGCTTGCAGACCCATAATGTCAATA	0	0	0	0	0	0	0	0	0	0	0	0	0	0	0	0	0	0	0	0	0	7.60774	7.54755	7.30586	0	0	0	0	0	0
119025_bclustnum_78_kamer_4_number_2	GCAATAAGTAATGTTGAACAGTAATAGTAACAATGCACAAAGATAACTCATAACACCATATTTTGTAAACTAGGG	7.58325	7.5928	7.54682	0	0	0	0	0	0	0	0	0	0	0	0	0	0	0	0	0	0	0	0	0	0	0	0	0	0	0
11904_bclustnum_277_kamer_1_number_1	AGATTTGATTCATATTGGCATGGATCCACAGTGTATGTTTGGTGGCCATGACCTGTCTTATTTGACATGGTTCTTTGCATGTCGGAATTTATGCTTTGAGCCATTTCAATTCTGAGGATGGGAATGCCTACCTCAGCGTTGAATATTA	0	0	0	0	0	0	5.0876	4.93447	4.84103	3.98898	4.38452	4.48864	1.09861	1.09861	1.09861	4.42228	4.45268	4.4257	6.12959	6.38519	6.52844	3.89763	3.92339	3.88597	0	0	0	0	0	0
119086_bclustnum_67_kamer_1_number_1	TGACCAGTTTGTATGCAACATCAACAGCTATGCATGGCATGCTGTTCAATCTGCTGGACTGATAAATTTGGTGAGATAATCCTCACAGCAAAATCTAAGAGGGGTTCTTTGATGGTATCAATTGC	6.61428	6.53621	6.55843	0	1.09861	1.09861	0	0	0	0	0	0	0	0	0	0	0	0	0	0	0	0	0	0	0	0	0	0	0	0
1190_bclustnum_2714_kamer_1_number_1	TAAATTAGAAGTCCATCGAAATTTTCATAGGGGTCTTATCCACAAGAGAAGAGATACCTATTAATCGAGTAAAATGTAGCACCAATTATTTAATTAAAATAATTAATTAGTCATCCTCATAAAATATTCATTACTTTGGACAACTAAATTCCACTATTATATGGAAAATCATTATTAACATACCACTGAAAACAATCGTCTTCAATCAAACACCCATTG	7.02402	6.96076	6.99354	1.60944	1.09861	1.09861	1.60944	0	1.40877	0	1.09861	2.0149	0	1.09861	0	1.50408	0	0	0	0	0	1.335	1.38629	1.38629	0	0	0	1.09861	0	0
1190_bclustnum_977_kamer_1_number_1	AGTATTAGCACTAATCCATCTGCCTTGCACTTATCTCTTCTAGAACTGCTTACATCACCTAGATACCTATTTTACNNN	0	0	0	0	0	0	1.60944	1.09861	1.60944	0	1.09861	1.09861	1.60944	1.79176	0	6.13896	5.90302	5.99894	0	0	0	6.77063	6.77194	6.80192	0	0	0	0	0	0
119105_bclustnum_12_kamer_1_number_1	CCATTTATGAAATAAATCACATTTTCTAAAAACTCATGTTCTTTAAGAAATCATGTAAACCTTCTAGTACCTGTGAATTTAAAAAAAGGGGGAATAAGCTTTATTGTTTCCGGACGCATGCGCAAAGTATTGAAAGTCGTTATTACGTAGAATGT	0	0	0	0	0	0	0	0	0	0	0	0	6.60818	6.6775	6.61731	0	0	0	0	0	0	0	0	0	0	0	0	0	0	0
11911_bclustnum_162_kamer_13_number_2	CACCATTCAGCAAGAGGTAACCACTTGACCCATTAGATCGGAAGAGCGTCGTTCGGGT	1.09861	1.09861	1.09861	0	1.60944	1.09861	4.04305	4.21213	3.82428	7.09782	7.34633	7.11947	0	0	0	0	0	0	3.3322	3.58352	3.8712	0	0	0	1.09861	0	1.09861	1.09861	0	1.09861
11911_bclustnum_88_kamer_1_number_1	TAGGTCTAAAGTGCCTAAGGGACTTTACTAACGCATACGCTTGTTTTTCCGTGTGTGCTTGTCCCACCCATCCTTTTTTTTCTCCCCCGCAATGTGTTTC	0	0	0	0	0	0	4.88172	4.90527	4.9158	0	0	0	0	0	0	0	0	0	6.71457	6.5811	6.49778	0	0	0	0	0	0	0	1.60944	1.09861
119184_bclustnum_183_kamer_1_number_1	GAGAAGGTATTTCATCCTCACCACACATAGTTTTCTCCTATTTTATCTATGATATAAGAAAATTTCAGAACTGGATGATCCACAATTACAGAGACACATCAGATTCAATATCAGGCTTCTATA	0	0	1.09861	1.09861	1.09861	1.09861	7.02402	7.14711	6.98031	1.09861	0	0	0	0	0	0	0	0	5.32161	5.26121	5.25675	0	0	0	0	0	0	0	0	0
119189_bclustnum_234_kamer_1_number_1	CTAATACAATGGTGAGAAAGTATTAGGTAAAATAAACCTGATCTATTACAATCCTAGATTGCTGAATGAAGGCACTTGATTTGCTCTATCTATCTTG	6.7051	6.74746	6.70292	0	0	0	0	0	0	0	0	0	0	0	0	0	0	0	0	0	0	0	0	0	0	0	0	0	0	0
11924_bclustnum_357_kamer_1_number_1	AACAGAGTTTTGGGTTCCGGGGGGAGAATGGTCGCAAGGCTGAAACTTAAAGGAATTGACGGAAGGGCACCACCAGGAGTGG	5.35541	5.42935	5.42935	6.2106	6.21461	6.21311	6.2171	6.28553	6.25575	6.81783	7.11558	7.18463	7.00443	6.92682	7.03351	6.88474	7.04947	6.96201	7.23526	7.00056	6.9719	7.17127	7.09133	7.12689	7.12769	7.29285	7.23778	6.55855	6.5385	6.45441
119275_bclustnum_394_kamer_1_number_1	GATCTACACTCTTTCCCTACACGACGCTCTTCCGATCTGTTAATTCCCAACATTTAGCTTTTGTTTATTGACATAGTGTATTCGAACGAATGAAAAATGGGATTCTCTCCTCACAAGGACTTCTATTTTGGTCTTTCTAATCCATAGATACCTGTTATTAGGATATTG	1.09861	1.335	1.09861	1.60944	0	0	1.335	0	0	11.2915	0	0	1.09861	0	0	0	0	0	0	0	0	1.09861	0	0	3.29584	2.09714	2.64795	0	0	1.09861
11935_bclustnum_151_kamer_1_number_1	GAGCCTTGAAGCAGCGATGAAGAATCACAACATCAATTTGGAGCACTCTTCACCTTCATCTTCAGGCATGGCACTTTATTCTTGTGGTTGTCAAGCAT	0	0	0	0	0	0	1.60944	1.84583	2.17222	6.60168	5.56877	5.66796	0	0	0	2.5123	2.75154	2.70805	4.62388	4.80129	4.73912	3.06805	3.19867	3.02042	0	0	0	0	0	0
11939_bclustnum_3531_kamer_1_number_1	CTAGATTCATTGAATCCATCTTCTTTTGTAGTTCATTTATGTCCCTACACATTTCTTCACCTTCAGCAAGAGTCCAAGTAGGATTTTCTGGAGGCTTATTTGGTGGAGAAGTTCCCTTTTTGGGTGGCATGTTGGCAAAGTATCACTT	0	0	0	0	0	0	0	0	0	0	0	0	0	0	0	6.20485	6.54924	6.32051	0	0	0	7.03489	6.99458	7.02681	0	0	0	0	0	0
1193_bclustnum_1118_kamer_31_number_2	AAGATTCCACCCCGATGGAAGGAAAACATCCTGGAAGTCAGGACCCAATCC	0	0	0	0	0	0	0	0	0	5.56605	6.4599	6.5335	0	0	0	0	0	0	1.09861	0	0	0	0	0	0	0	0	0	0	0
119428_bclustnum_42_kamer_1_number_1	TTTTCATGAAGCATTATTCCTTTAAAGATCCATGCTTCATTTGGAATACCACAACCGAAGGTTTTGAGAAAAGAATAACTCACCTTCTTAAAGA	7.2721	7.29331	7.25347	0	1.60944	0	0	0	0	0	0	0	0	0	0	0	0	0	0	0	0	0	0	0	0	0	0	0	0	0
119495_bclustnum_3_kamer_1_number_1	ATCCTTCATGAACTTAATCCACTGTTCACCATAAACGTGACGATGAGGGACATAAAAAGTAAAAATGTCTACAGTAAAGTCAATAGCAAGGCCACGACGCAATGAGAAAG	0	0	0	0	0	0	0	0	0	0	0	0	0	0	0	0	0	0	0	0	0	6.82806	6.77582	6.5647	0	0	0	0	0	0
119542_bclustnum_11_kamer_1_number_1	AAATATTCAATTTTATTATTTTAATTAATAATTTCTCTGTAAATGACTTTTCAGAGAAAATATTAATTATGAGGCTGAATCGACATCCGAAGTCGGG	0	0	0	0	0	0	0	0	1.09861	0	0	0	6.5506	6.41473	6.42595	0	0	0	0	0	0	0	0	0	1.09861	0	0	0	1.09861	0
11959_bclustnum_78_kamer_1_number_1	TCGGTGGTTGTCTCGCGTTGGTTAACAGGATACATCATTGCCCGATAATCCAACGATTTCTCACATGGTAGACTTCAGCTCATTTATTCCCATTATGT	0	0	0	0	0	0	2.06546	2.06142	2.22162	6.11932	7.07355	7.0898	0	0	0	0	0	1.09861	2.8462	2.19722	2.5123	0	0	0	0	0	0	0	0	0
1195_bclustnum_160_kamer_1_number_1	TATGGGTTATGAAAATAACAAAATCATCAGGAGAAGAGATGTGATATTCAATGA	0	0	0	0	0	0	2.19722	1.94591	2.10413	1.94591	1.60944	1.09861	6.86129	6.77924	6.88121	2.15176	1.94591	1.60944	1.94591	1.94591	1.94591	2.36085	3.35341	3.06339	0	0	0	0	1.94591	1.09861
11960_bclustnum_597_kamer_19_number_2	CCTTTGTCACAATGTGATGTTGGACCATGGTTGATTTTCAATTAAGCAATATTTGTC	0	0	0	1.09861	1.09861	0	6.52356	6.61114	6.61294	5.761	6.11073	6.03708	0	0	0	0	0	0	6.22588	6.4552	6.22851	0	0	0	1.09861	0	0	0	0	0
11965_bclustnum_568_kamer_1_number_1	TATTTTTTCCGCCTTGCCGTCCATCTATTTTTAGACTGGAAATCTAAAAATAGATTCCGCCCAGTATGTCTAAACCTTGCCCAGCCAAGATCGGAAGAGCGTCGTTAGGGAAGAGTGTAGATC	0	0	0	1.09861	0	0	1.09861	1.09861	1.09861	6.5174	7.42516	7.43701	0	0	0	0	0	0	0	0	0	0	0	0	0	0	0	0	0	0
11965_bclustnum_940_kamer_1_number_1	AGCAGCAAAGCTCCAAAGGAGAAATCAGAAAAGACGCAAACCCAAATATCCTTGTCTAATATGTGAACAACATCATGACACCAGGGATTGCCCGCATCGGGCTGAGGTTGTGAAAATCGTAAAAGGTTCCGAGACTCCTGTAGTTTTGAAAGATACCTTTACAAAGCAAGCGTCTAAAAATATAGGTTA	0	0	0	0	0	0	2.17853	2.76362	2.47293	1.88707	1.09861	1.60944	0	0	0	0	0	0	6.79284	6.65872	6.68239	0	0	0	0	0	0	0	0	0
119692_bclustnum_38_kamer_1_number_1	ATTTCTTAACCTTAACACCTTCCAAAAGAAGTCTAAGGGTCTTGAACTTCGACAAAAAATATTCAACGGAAGAAAATTTATTTGGGTCCAACATAAGCATCAATAAATCGTCTATAGCAGAATCAAGTAGGTGGAGAGCTACTGAGAGAAGGACAATAACAGGAGATTTTATCCTAGGCTTTTACACTAG	0	1.09861	0	0	0	1.09861	7.09622	7.05755	7.12673	3.67489	3.27924	3.20275	0	0	0	0	0	1.09861	7.28083	7.3983	7.37676	0	0	0	0	0	0	0	1.09861	1.09861
119704_bclustnum_171_kamer_6_number_2	TGACAAAGTGACAAAATAATGATTGAAACACATTTATCATACTTGTATCAATTTGTTTTAAACA	6.54439	6.51075	6.53766	0	0	0	0	0	0	0	0	0	0	0	0	0	0	0	0	0	0	0	0	0	0	0	0	0	0	0
11972_bclustnum_185_kamer_1_number_1	AAGTTGAAGGTGAAGATAGAGAGAGTGAAGAGAGGTAGGGAAAGAGATATGAATATGGAGAGGGAGAGAGGGGGGGCGGAGAGA	0	0	0	0	1.09861	0	2.02438	1.60944	1.66501	5.50939	6.88806	6.75635	0	0	0	0	0	1.09861	0	1.09861	1.46634	1.60944	1.09861	0	0	0	0	1.38629	1.5506	0
119853_bclustnum_44_kamer_1_number_1	TCTGCACGGCAGCTACAAATGGACAAGATTGTGGAGGAGTACAAAGACATCTTCACCTCCCCGGCAAGGGTTCCCTGCACG	0	0	0	0	0	0	6.41836	6.35828	6.40935	1.98591	1.60944	1.09861	0	0	0	0	1.09861	1.09861	6.72833	6.47543	6.38519	1.09861	1.09861	1.09861	0	0	0	0	0	0
11_bclustnum_31327_kamer_1_number_1	TGTTGGAGCTTGGCCATGTATTTGTATTAGGTGGATCATGTATGGTGATATGTATCATGT	0	0	0	0	0	0	0	0	0	0	0	0	6.63568	6.48362	6.66823	0	0	0	0	0	0	0	0	0	0	0	0	0	0	0
11_bclustnum_82728_kamer_1_number_1	TATGTATATGCATCATATTTGATGCTTGGACCATGTATCTATATATGTATCAGGTGGATACATTGTATGATTAGGTAGATCATGTATGTTGAATAGAT	0	0	0	0	0	0	0	0	0	0	0	0	6.622	6.57601	6.60259	0	0	0	0	0	0	0	0	0	0	0	0	0	0	0
120007_bclustnum_3_kamer_1_number_1	ATTATGCTTGGAATGTATTGTAAGATCATTTGTGATCGGGAGAGAGACTGAGAGAG	0	0	0	0	0	0	0	0	0	0	0	0	0	0	0	0	0	0	0	0	0	0	0	0	0	0	0	6.9924	7.00699	6.92984
120014_bclustnum_4_kamer_8_number_2	TTCAATTCAGAAAAATCAGAAGCAAAAAGACAAGGGAAAAGAACATTCCATACAAGAAGGAAGGGTACACCAAGCCCTTCAATGAG	0	0	0	0	0	0	5.36714	5.43481	5.45104	0	0	0	0	0	0	0	0	1.09861	6.69363	6.55571	6.61238	0	0	1.60944	0	0	0	0	0	0
120091_bclustnum_44_kamer_1_number_1	ATTCGCTCCATTATTTGTTCTTAACTTTTGAATTTGATGTCCAGATTGTTTTCCTACAAGAGCCTTGTAGGCCAAAAACATGTCAAAATACACTCTTAAGTTTAAGAATTAA	0	0	0	0	0	0	6.27305	6.341	6.43279	4.25135	4.72028	4.60717	2.7554	2.56495	2.77825	3.43983	3.43399	3.41623	6.78374	6.78271	6.8619	3.26853	3.21888	3.41623	0	0	0	1.09861	1.09861	0
120156_bclustnum_26_kamer_1_number_1	GTATCAGATGTCGAACCAGTAAGACAACGACTTCGACAGGTGCACCCTAAGAAAGCTGCCGCCATTAAAGCAGAAGTTGAAAAACTTCTCCATGCTGGATTCATC	0	0	0	0	0	0	6.54045	6.56667	6.61473	2.66259	2.96527	3.44316	1.98591	2.19722	2.19722	0	0	0	4.81543	4.7484	4.97259	0	0	1.09861	0	0	0	0	1.09861	0
120191_bclustnum_81_kamer_1_number_1	AAATGGCTTTCAAGTCAAACATCCTGCTGATGGAAGTATTGAGAAATATAAAGCAAGGTTTGTCGCTCGTGGCTTTTCTCAAGAGGAAGGCATTGACTATGAAGAGACATTGGGTGCTTTGGCGCGGTACACTTGCAGCAGAACCATT	2.30259	2.00148	1.38629	2.19722	1.8718	0	2.80672	2.3979	3.18635	2.54273	3.13549	2.97893	2.68102	2.92316	2.83321	6.86901	6.5315	6.60935	3.31054	2.96527	2.97041	7.07991	7.19476	7.17807	0	0	0	1.29928	1.09861	1.60944
12023_bclustnum_110_kamer_1_number_1	GCACAGTATGTAAAATAATTTGTGCACAGACACTCATTTCTCATATGAGCAAGAATGATACATGGATTATAGACAGTGGTTGCTCTCATCACATGACTGGTGATAAAAGCAAGCATCCATGCGACGGCACTCAT	6.64365	6.63638	6.6936	1.29928	1.09861	0	1.52606	1.09861	1.09861	1.94591	1.75786	2.00148	0	0	0	0	0	0	0	0	1.09861	0	0	0	0	0	0	0	0	0
120283_bclustnum_81_kamer_1_number_1	AAATTTATGGTTTACATGCGGCACCCTAAATTTTGGGTTTCGACCCGGCGACCAAAATTTGGGGTTTTCACTCGACGCCCTACCCTTAGTGTTTCCACCAGCGC	0	0	0	0	0	0	3.62286	3.4692	3.49651	0	0	0	0	0	0	0	0	0	6.69481	6.30737	6.57256	0	0	0	0	0	0	0	0	0
12029_bclustnum_1714_kamer_9_number_2	GGGGGGGGAAGAGGGGAGGTGTTGGGGGGGCCCGGGGAGTTACAAAAAAGCAAGAAGAGAAACAGCAGATAAC	0	0	0	0	0	0	0	0	0	6.79555	0	1.09861	0	0	0	0	0	0	0	0	0	0	0	0	0	0	0	0	0	0
120353_bclustnum_152_kamer_1_number_1	TCCACTATCAAGCTCCAAAAGGTGGAACCCGAAGATCCAGAGGAGGGAGATCGTTTCTTCCATTCACAGATGTAAGTGAAGGGTTCATCGCTACAATTCATTTCGCCA	0	0	0	0	0	0	6.21341	6.14504	6.13383	2.69463	3.4012	3.16125	0	0	0	1.09861	1.09861	0	6.89142	6.60746	6.49919	1.94591	1.29928	0	0	0	0	0	0	0
120420_bclustnum_20_kamer_1_number_1	CTATCCTAGAAAATACGGCTGGGGCGTTCTTTAAGCCAAAAGGCATAACTCTATAAGCAAAAAAACAAATGTTGAGATCGAAGAG	0	0	0	6.54334	6.33741	6.67582	0	0	0	0	0	0	0	1.09861	0	0	0	0	0	0	0	1.09861	0	0	0	0	0	2.78148	3.23024	2.9139
120442_bclustnum_4_kamer_1_number_1	CTTTGCGGGAGTGCAGCGTTTCATGTGGCTACTGGTTCCTAGATGTGCATTGCAGTAGACTATTTTTGAGGCACCATTTTCAACTGGTGCGAAGCTGCATTGGCCAAGTAAAA	0	0	0	0	0	0	4.16313	4.50456	4.26268	4.44051	5.02088	5.00028	0	0	0	0	0	0	7.23372	7.06685	6.97788	0	0	0	0	0	0	0	0	0
120582_bclustnum_56_kamer_1_number_1	GTTTTTTGTACATCATCTTCATGAATTTATAAAGATTTCCACGTTCTACAGCTAGTTTTTATATTTTGGTTCAAAAAGTGCCTGATGTATGCATTTTTATCTTAA	1.09861	0	0	0	0	0	0	0	0	0	0	0	2.54945	2.61496	0	0	0	0	0	0	0	0	0	0	0	0	0	6.66058	6.6733	6.66466
120597_bclustnum_120_kamer_1_number_1	ATGCAGCCGTTTGAGCATGTTATAGAAGATTGTCTTGTTCTGCTAGCTAAGCTTCAGGAGAGAAGAGGATCTCAGTAGAACTTGCGAGTACAAATACAATAAAGTACAACTGACGACACTTCCAATCAGAGGAATAATACATCTCCATTGGGGATACAAT	0	0	0	0	0	0	0	1.09861	0	0	1.60944	0	6.45273	6.42949	6.51217	1.52606	0	1.09861	0	0	0	1.09861	1.56398	1.60944	0	0	0	0	0	0
12059_bclustnum_216_kamer_31_number_2	GGCGGTTGAATCATTTTTTCTACAAGGGCAAAGGTTTCATTATAGTCAATTCCTTCAAC	0	0	0	1.09861	1.09861	1.09861	1.60944	1.50408	0	1.60944	1.09861	1.09861	2.99573	2.98568	3.09104	5.83481	6.14847	6.17309	1.79176	1.7346	2.36085	6.45415	6.46355	6.52844	0	0	0	1.50408	1.09861	0
120686_bclustnum_177_kamer_1_number_1	CTAGCCTAAAGTAGGCTCTTCCAAAGACAAAGATCAAACCCTAGAAGCAAACCC	0	0	0	0	0	0	0	0	0	0	0	0	0	0	0	0	0	0	0	0	0	0	0	0	0	0	0	6.73602	6.71925	7.00397
120717_bclustnum_388_kamer_1_number_1	GTATATATATACATATATATACACATGTACATATTTATGTAACTTCAAGCCTCTAACCTCTTAAGGCAATATATCATATATGAGCCAATAGATGTTTCCATCCAATTAGC	7.00624	7.41998	7.29596	5.07517	5.09375	5.22575	3.9982	4.03424	3.90197	1.8563	2.68102	3.77276	2.99573	3.38439	3.43399	0	0	0	1.09861	0	0	1.09861	1.09861	2.0149	1.60944	0	1.94591	4.74927	4.89035	4.76899
120732_bclustnum_58_kamer_1_number_1	AATATGATTTAAATCATTAATTGCAAAATAACTGTAATGACTTGGTTCAAACGTTATATAAGATAATTTTTTCACATGCATA	0	0	0	0	0	0	0	0	0	0	0	0	0	0	0	0	0	0	0	0	0	0	0	0	0	0	0	6.57368	6.57053	6.61103
120765_bclustnum_22_kamer_1_number_1	CCCAGTATAGAATGTTGACCAAGTATGAAGGCACTTAGGCATGGGGGCTCCCAGTCCCTCGTCCACAAAAGTCGCCAAATTGCAGGGAACCCGGGGATTCCATGTCTCACCTTGTCGAAAGCATCCCATGTGTGGGAA	0	0	0	2.56495	2.5337	2.94444	2.34181	2.26176	2.24071	0	0	0	0	0	0	0	0	0	6.81058	6.6738	6.57981	0	0	0	0	0	0	0	1.09861	0
120789_bclustnum_24_kamer_1_number_1	TCCCTCTTTCATCTATTTGATTGTAAGCAACTCTGCATGTTTCCTGTTGTTCACTATGATTTCTCCCATTACCACTACCAGGCTGAATCCGGATCGGA	0	0	0	0	0	0	0	0	0	6.9154	7.59806	7.56407	0	0	0	0	0	0	0	0	0	0	0	0	0	0	0	0	0	0
120840_bclustnum_225_kamer_1_number_1	ATATATCAGTGAAGCCCGGAATTGAGGAGAACATTCATATAGGTGCCGCTTGTACTGAAGAAGAAATCCAAACTTACAAGGCCATATTCCAAGAATTTTGCGATGTGTTTGCCTGGTTTACGAGAAATGCCAGTAATC	0	0	0	0	0	0	6.80402	6.80145	6.83129	1.09861	0	1.09861	0	0	0	0	0	1.60944	5.43103	5.27221	5.16742	1.94591	1.09861	1.09861	0	0	0	1.09861	0	0
120872_bclustnum_5_kamer_1_number_1	ATTGTTGCTAAAGTAGAGACTACAACAGCACCTTTGGTCCAGAATCCAAAACCACTCCCGGTGAGCACAAATATTCTCCAGTACATCTACTGAGTATGAAGATTTTCT	0	0	0	6.75134	6.78649	6.79212	0	0	0	0	0	0	0	0	0	0	0	0	0	0	0	0	0	0	0	0	0	0	0	0
12094_bclustnum_375_kamer_1_number_1	AAAATTTTTTGGTCGGAACCTCAACAGAAGGTGTTCAAAGAATTGAAAAATCGCCTCTGTTCTGCCCCAGTGCTCACCTTACCGGACTTGCAGCAGCCATTTGAGATCG	0	0	0	0	0	0	0	1.09861	0	6.11986	6.62566	6.57535	0	0	0	1.09861	0	0	1.71765	0	1.09861	0	1.09861	0	0	0	0	0	0	0
121100_bclustnum_106_kamer_3_number_2	CTCTTTTCACACCTCTCCTATCCCAAGCTCAAAATTTCATTTAAACCACACATGACTTTTGGTGTTTCACCTCCTAGGGTTAGGTTTTGGAATTCATGGTAATACAATAAG	0	0	0	0	0	0	6.06379	6.08677	6.0742	0	0	0	0	0	0	1.17007	1.67398	1.09861	6.57786	6.61874	6.26492	2.62467	2.14007	2.3979	0	1.09861	0	0	0	0
121106_bclustnum_179_kamer_1_number_1	ATCCTCTCATGCATTCCCATGGATTCAATCTAGGGTTACAATAAAATGACCATAGTTCTTATGCCACTTGTAAGGAAACTTGCAAGAAAAATATACC	6.51504	6.43276	6.44024	0	0	0	0	0	0	0	0	0	0	0	0	0	0	0	0	0	0	0	0	0	0	0	1.09861	0	0	0
121106_bclustnum_1920_kamer_1_number_1	GCCTTCCCCCAACATACGTCCATATCGCCACCCCTTTGCCCAGAAAAATGAAATTGAAAAAATGGTCG	0	0	0	0	0	0	0	1.09861	0	0	0	0	1.09861	0	0	7.19411	7.06854	6.92938	0	0	0	6.94271	7.02019	6.99589	0	0	0	1.09861	1.09861	0
121149_bclustnum_38_kamer_1_number_1	CTCTAGATGATGTTCCTATTAGATTACAGCGCTATGTAGTTGGGGTCCCAAGACCATTTAGGAGATTTTTTTAGAGTAGCGCGTGCAGTAGTGTCATATAGAGATCACCACCAGTGATTGGACGATCACTTTTGTAGACTTCT	0	0	0	0	0	0	1.09861	1.7346	2.06142	1.09861	0	1.09861	0	0	0	0	0	0	6.76628	6.96928	6.85622	0	0	0	0	0	0	0	0	0
121189_bclustnum_78_kamer_1_number_1	TCATCTGGTTGATAGTGCCAGCACCCGCAACTTTATTCATCGCCCAAGAAACCCATTGCTATATCCATGCTGTTAATAATTTTCAAATCATGATTGCCAATGGGGGCTCTATGAAATGTGGAGGGCGCTGTGAAAATGTG	0	0	0	0	0	0	0	0	0	0	0	0	0	0	0	7.07892	6.80742	6.80214	0	0	0	6.57293	6.60758	6.62896	0	0	0	0	0	1.09861
12121_bclustnum_681_kamer_1_number_1	TGACTGCTCAGGAAAAACTAGGCACAAAGGGTGTACCAAATATCCGTGAACTGCAATATACACCTGCTTTAATAATGAAACAAAAATCGACCAAGAACT	0	0	0	0	0	0	3.34404	2.73003	2.85263	6.55219	6.87924	6.85751	0	0	0	0	0	0	3.39749	3.28757	3.03389	0	0	0	0	0	0	0	0	0
121237_bclustnum_180_kamer_1_number_1	AAGGATTCATTTGTCAAAGAACACAAATTATGTGTGTAAATTAACGAAGGCCTTGTATTGTCTAAAACAAGCCCCTAGAGCATGGTACTCTAGATTGGAAAAGTATCTGCAGCAGGAAGGGTTCAGAAAAGAAAGTGCAGACAACAACCTCTACATCAAGGCTAACCAA	6.53922	6.34548	6.54283	2.63906	2.76562	2.53017	1.43508	1.60944	2.70805	3.78872	4.13677	3.78244	1.60944	1.09861	1.94591	4.80811	4.81927	4.7611	1.7346	1.50408	1.99243	4.96842	4.7185	4.74493	1.60944	1.09861	1.60944	1.09861	1.38629	1.35812
121260_bclustnum_120_kamer_1_number_1	AAAAGGATCTTCCTCTAGATGCTTCTTTTTAGTAAAAAAAAGGGTCGAAGGGATTGAGACCCCTACTTTGGATATTATTGAAATAGAGATCGGCTCAACTGGAGGTCGCCCCCTGAACATTGATTTCAATTAAAG	0	0	0	0	0	0	0	0	0	0	0	0	0	0	0	6.2224	6.76839	6.6071	0	0	0	5.9108	5.98645	5.94437	0	0	0	0	0	0
121263_bclustnum_94_kamer_1_number_1	CAAGAGAGGATTTCTCAACTTCAATGTTGAGCCCAACTAATCCCTTCACCTCAAGACTTCTCTTCCCTCCCAAGGGTGAGTGAAGCCTTCAC	6.47406	6.52844	6.41473	0	0	0	0	0	0	0	0	0	0	0	0	0	0	0	0	0	0	0	0	0	0	0	0	0	0	0
121311_bclustnum_97_kamer_1_number_1	GTCATGTGCATATTGTTCTATGTAACTCTCATGTACAATAGAATCACTAATGACTGGTCTCGAAAGCAAGTACTTAGAGGATAACCCTTGAAATTA	0	0	0	0	0	1.09861	4.07754	4.25135	3.97781	5.90989	6.58064	6.2779	0	0	0	1.09861	1.09861	0	3.49651	2.92316	3.11795	2.19722	0	0	0	0	0	0	0	0
121469_bclustnum_763_kamer_3_number_2	CGCCGGTACGCTGTGACGTTTCTCCTGTAACGTCGCTTTTTCCAATGCCACCGCCGG	0	0	0	0	0	0	0	0	0	5.29498	6.76696	6.79272	0	0	0	0	0	0	0	0	0	0	0	0	0	0	0	0	0	0
121475_bclustnum_45_kamer_1_number_1	CTCTTAAATGGTTTAAGAAGGACAAAATCCCAGGCCCTAATGGTTGGCCTATTAAATTCTACCTCATCGGCAAGGATCAATATTGTGATATGAATATCAGGATTTAACTGTGTGATTTTGAGTCAAACTCATTGACCCATGTTTCATGAGTAGTGATTCAA	6.43903	6.55877	6.58218	0	0	0	1.20397	1.94591	1.09861	2.74084	2.61496	2.33537	0	0	1.09861	0	0	0	2.53898	1.94591	2.53898	1.09861	1.09861	1.09861	0	0	0	1.09861	1.09861	0
121543_bclustnum_22_kamer_1_number_1	CTCATTCAAAGCAGTCAGAGTCCCATGTAATTGAACAATAGTAAGAGTTTGCAGATCTTGCCTTTCTTCAATAGCGGAGACTTTAGAGTCAAATTTTGGAGTCAAGGATCTTAAGACT	0	0	0	0	0	0	1.09861	0	0	6.52516	6.23779	6.22779	0	0	0	0	0	0	0	0	1.41369	0	0	0	0	0	0	0	0	0
12162_bclustnum_37_kamer_1_number_1	CTATTCCTCTTTCTGAGAGAAGCCACGAGCTATGAATCTTGCTTTGTATTTCTTTATGCTGCCATTTACAGCATGCTTGATCTTGATAGATCCATATGGAAGTCATAACAAACTTCCCTTCAGGTCTTGG	0	0	0	0	0	0	1.60944	0	1.43508	1.25276	1.09861	1.43508	6.89585	6.82093	6.8441	1.60944	0	1.09861	1.54045	1.15268	1.60944	1.09861	0	1.09861	0	0	0	2.48491	2.22162	1.94591
121641_bclustnum_233_kamer_1_number_1	GTCCTGTTGCCATTGGTGTGCTGATAGGTTTCAAATCTTCTAGACCAAATGTCTTGAGTATCTCTTTGATATACTTTGATTGGTCAAAATATACCATGTTTTAGTTGATGTACTTGCAATCTAACAAA	6.57345	6.59236	6.53112	0	0	0	0	0	0	0	0	0	0	0	0	0	0	0	0	0	0	0	0	0	0	0	0	0	0	0
121696_bclustnum_65_kamer_1_number_1	AGTCGCGACCCACATACGACCCACGCCCATTGTTCCTGTGAACACGGGATAACACATCTATCTCCAAG	0	0	0	0	0	0	7.03589	7.18967	7.2823	7.92769	8.82001	8.77534	0	0	0	0	0	0	8.54955	8.10587	8.32862	0	0	0	2.60269	2.34455	2.0149	0	0	0
1217_bclustnum_3162_kamer_1_number_1	AAATCTTGCTTTTATTTCCAATACTTCCATCAGCAACATGTTTTATTTTG	0	1.09861	0	0	0	0	0	0	0	0	0	0	0	0	0	6.41083	5.94699	6.13079	0	0	0	6.73245	6.75577	6.79705	0	0	0	0	0	0
1217_bclustnum_496_kamer_1_number_1	AGCTTCAGGGCAACCTCCCCACCAATTCGCGCTTGTTGAAGAAGTCTTCTCCACCTGTAAAAAGATATGGCAAATATGCAAGATAGCTACAATAGAT	0	0	0	0	0	0	0	0	0	0	0	0	6.7676	6.67161	6.69964	0	0	0	0	0	0	0	0	0	0	0	0	0	0	0
1218_bclustnum_1037_kamer_1_number_1	CTCTAAAATGGAACCTCTGAAGGCAAGACCGGTTCAACTGTCGCCTGAACCTTTTGACTTTCGTCTGGTATGGGTTCAGATGGTTTGTCTTCAATGAAAAATGCTTCGACTAAACACAATGGCGTGTCA	0	0	0	1.09861	0	0	6.61114	6.61562	6.53983	0	0	0	0	0	0	0	0	0	5.71263	5.45603	5.7414	0	0	0	0	0	0	0	0	0
121932_bclustnum_88_kamer_1_number_1	AACATTATTTTGTTCCCATCATGAGTTTCCTCTACTATCTTTTTGCCATTAGGAATCCTGTCTTGTATCAACTTTGTCAAAACATTCCTTCAAACCTTAGATCGGAAGAGCGTCGTGTAGGGACAGAGGGT	0	1.09861	0	1.09861	0	0	4.77539	4.79579	4.9445	6.74935	6.90595	7.05589	0	0	0	0	0	0	4.68316	4.78916	4.42365	0	0	1.50408	0	0	1.09861	0	0	0
121976_bclustnum_94_kamer_1_number_1	GAAGGTCCTCGCGGTAGACCTGGGCCAAATCCCTTGGAAGGGTCCAAGGAGGAAGGGGACGCCTGAGAGGGTGATTTCCCCGTCAGGCCGGGACCCTGCCGCATCACGAGGCATTGTCGACGAGTCAGGTTGTTTGGGAA	0	0	0	0	0	0	4.59062	4.61292	4.77539	5.81678	7.20849	7.50885	1.09861	0	0	0	1.60944	1.09861	6.01176	5.49748	5.52484	1.09861	0	0	0	0	0	0	0	0
12198_bclustnum_9782_kamer_1_number_1	GGTCTGCACCCAGTCTTCAATGTGGATCGCCTTCGTCCTTGCTTCCCACCTCTACTGGACACTACAGACAGGGCAGAACAATTCACACCAACAGAGATAAACCTAGACTGCATGGAACAGGCCAACATAGAAGATCGGAAGAGCGTCGTGTAGGGAAAGATGTAGA	1.50408	0	1.09861	1.09861	1.09861	1.09861	3.22552	3.90533	3.31678	5.44242	6.51792	6.45284	0	0	0	2.21557	2.05839	2.25129	3.88841	4.27898	3.63759	2.47092	2.47092	1.99655	0	0	1.09861	0	0	0
122185_bclustnum_15_kamer_3_number_2	TAACAAGGTAAGACCTAATAGTCTTTTTAAGCTTTAATAGGAAAACCTTTCATAGGGTAGATCATGTTTCATGAT	6.6271	6.63501	6.57627	0	0	0	0	0	0	0	0	0	0	0	0	0	0	0	0	0	0	0	0	0	0	0	0	0	0	0
122225_bclustnum_93_kamer_1_number_1	TGCAATGTGAGGGTGATTTCGAGTGAGATCTTCAGTACGATCTCCAGTGCGATCTCGACGGCGATATCGAGTGCGCTCTCGAGTG	1.09861	1.09861	1.79176	0	0	0	0	0	0	0	0	0	0	0	0	0	0	0	0	0	0	0	0	0	7.48099	7.96111	7.39771	0	0	0
12222_bclustnum_685_kamer_1_number_1	TGATCTTCTCACAGTTGGAGTTTGTGGCTTTTCCTCTTCTGAGTCTTCTTCTGTTGTAGAGTATGATTCCTCCTCATTTAGCTAAAACTGTATATTACATACTAAACACCTTATTTTATAGTAATAATCTAATA	0	0	0	0	0	0	3.49651	3.92746	4.1396	6.5626	6.76119	6.78835	0	0	0	0	0	0	4.4786	4.37785	4.59512	0	0	0	0	0	0	0	1.09861	0
122341_bclustnum_65_kamer_15_number_2	GTTGATGGTGGTCGTACATTTCAGTTAAATGTGACCAAACCTTAAGGCAAGTGAAGGACAATGCCAATATCAAGTCA	0	0	0	0	0	0	6.46748	6.62369	6.60181	0	0	0	0	0	0	0	0	0	5.56889	5.72685	5.56998	0	0	0	0	0	0	0	0	0
122351_bclustnum_107_kamer_7_number_2	GAATTCTCCCATCACCTTGAATCGGTTGTCACTCTATTAGAGGAGGAAAACCCATCCGTTGACAACTTGGCCAATAGAGGGCT	0	0	0	6.48806	6.51841	6.45598	0	0	0	0	0	0	0	0	0	0	0	0	0	0	0	0	0	0	0	0	0	0	0	0
122383_bclustnum_24_kamer_1_number_1	ACATAGTTGCTACAAAGACCCTAACTTGTCCCACAAAGCCTTTACTCTCACTTCCCCACATACATTCAAAAAAACAGAATCTGAGATACACAACCATATTGTGGTCTTTTCTTTCTGATCCAACTTCA	0	0	0	0	0	0	6.88244	6.85804	6.89078	4.09712	4.43675	3.94481	0	0	0	0	0	0	7.54618	7.57891	7.47364	0	0	0	0	0	0	0	0	0
122414_bclustnum_152_kamer_1_number_1	ATGCACCAGGTTCACTATATACCAAGTCGCGTATATTGTACACACGCACTTTCATATAAGGAAAGGTATACATAGGTTCCTTATATAC	0	0	0	1.09861	1.09861	1.09861	6.89602	6.6536	6.53886	1.09861	0	0	0	0	0	0	0	0	6.06727	6.05812	6.1334	0	0	0	1.09861	0	0	0	0	0
122416_bclustnum_97_kamer_1_number_1	AACTCTTAAACCTGTCAAAGACTTCATATTTCTTCTTGAGGAAATATATCCAAGT	0	0	0	0	0	0	6.43903	6.43004	6.47912	2.96527	3.96272	3.97029	0	0	0	5.0814	5.34425	5.23325	6.88735	6.79995	7.03298	5.53969	5.43197	5.50126	0	0	0	2.56495	2.90142	2.62467
122491_bclustnum_124_kamer_5_number_2	ATATGATCTGCTCTTGTTTCATTCAATTTTGTGCCAAATTTAGGTTATCCTTTAAG	2.94444	2.94444	2.94444	0	0	0	2.33537	3.42318	2.42775	7.55398	7.64699	7.66027	0	0	0	0	0	0	2.89037	3.07578	2.90872	0	0	0	0	0	0	0	0	0
122507_bclustnum_62_kamer_1_number_1	TTTTCATTCTTTGATTAATAAATTGTCTGTACCCACGTTGGGACAGGCCGTGGACTGTTTCCCTCCTTGCACTCTGAGGGGTTTAAACACGTCTTTTAGGGGATGAGGAGTGGTCCTACAACAGTATG	0	0	0	1.23676	1.38629	1.09861	7.06619	7.07242	6.9558	2.46385	2.87168	3.42318	0	0	0	0	0	0	7.0074	7.12707	7.08739	0	0	0	0	0	0	1.82455	2.37158	2.47561
122559_bclustnum_107_kamer_1_number_1	CCAGCTCCCAGCTCTTTGCTCTCCAAGCAGATCCAGCTACACACAAGACCTGCACAACAAGAGAGAGCAAACTAACAGATACAAGCCTCAAG	0	0	0	0	1.09861	0	6.52291	6.53782	6.61696	0	0	0	0	0	0	0	0	0	0	0	0	0	0	0	0	0	0	0	0	0
122574_bclustnum_37_kamer_1_number_1	GGGGGAGAATTTCTGATGCCTGCCAAGTGTGTCAATGATGCAAGAGAGATATTGCGGCAGAGTTTGAGATGAAGGACATCGGCTTGATGCATTACTTTTTGGGTTTGGAGGTGTAGCA	0	0	0	1.4816	1.29928	0	5.91889	5.98331	5.99956	6.43093	7.0193	6.9824	2.2882	2.5123	1.99243	1.34993	1.09861	1.60944	6.88295	6.61473	6.806	2.07944	0	2.48491	0	0	0	2.42354	2.46385	2.65676
1225_bclustnum_1815_kamer_1_number_1	GATACAAATGAACAAAACCTCCTTCTATATATAAGAGTCCATGGGGCCACAATATAACCTAGCG	0	0	0	0	0	0	1.89712	1.54045	1.09861	7.10085	7.81224	7.81467	0	0	0	0	0	0	1.94591	2.03688	1.09861	0	0	0	0	0	0	0	0	0
1225_bclustnum_3416_kamer_9_number_2	ATGTATGGGGCATATAAAAAGGATAGAGACTCCCTGCGAGGCGCATGTGGCTGGTTT	0	0	0	1.09861	0	0	6.91307	6.99118	6.91307	0	0	0	0	0	0	0	0	0	6.98995	6.90375	6.91639	0	0	0	0	0	0	0	0	0
122626_bclustnum_875_kamer_1_number_1	ATGGTGATGTAAACAGCTTTCCGTTATAGGTTCTGGAAATGTTAATGTTTCTAATGGTACCTTGGAAAGTGTTTTTCATGTTAA	0	0	0	0	0	0	0	0	0	0	0	0	0	0	0	0	0	0	0	0	0	0	0	0	0	0	0	6.65093	6.52173	6.56843
12263_bclustnum_188_kamer_1_number_1	AAATATAAATATTTAATATCATGAAATGATTATATTTCTATTACTAAATATGCTAACCTAGGTATATACTTTAGGTTAAATAGATCG	0	0	0	6.49753	6.48043	6.54679	0	1.09861	0	0	0	0	0	0	0	0	0	0	0	0	0	0	0	0	0	0	0	0	0	0
122653_bclustnum_519_kamer_1_number_1	ACATTTCTCCAGGGTAATCAACCTGCAACACAATGAATCACACCGTCTTGCAATTCCTACTGTTATGAAATTAGTCAATAATAACCATTGCATTCACAAATTCATATCTGCATTC	0	0	0	0	0	0	0	0	0	0	0	0	0	0	0	0	0	0	0	0	0	0	0	0	0	0	0	6.65684	6.63797	6.67628
122688_bclustnum_222_kamer_1_number_1	TCTTCCCTTGGTGACTTGACTCAAGGGCCAGTGATAGAGAGAATCCCAACACAAACTTGCG	0	0	0	0	0	0	6.68253	6.67624	6.60439	5.96956	6.47286	6.41072	2.73003	3.09104	2.70805	5.59223	5.4161	5.53864	7.16369	7.06476	7.03556	5.74086	5.586	5.59223	0	0	0	0	0	0
122710_bclustnum_5_kamer_1_number_1	CGCTCTCGAGTGCGCTCTCAAGGGTGGGTGCCGTCCAGAGCGCTCTTGAGTACGCAACCTAGAGACGCCTCCAAAGAAAGCGTTCTCGAGCCTGATCTCGAGAACGCTCTATAGTGCGCGCAAATGG	1.09861	1.60944	1.09861	0	0	0	0	0	0	0	0	0	0	0	0	0	0	0	0	0	0	0	0	0	7.06872	7.33983	7.1175	0	0	0
122832_bclustnum_109_kamer_1_number_1	GGCCGCCTCACACGGCACGACCGAACGATCCGACCCGAACGGACGCCCTC	0	0	0	0	0	0	0	0	0	5.71637	7.59095	7.65681	0	0	0	0	0	0	0	0	0	0	0	0	0	0	0	0	0	0
122838_bclustnum_262_kamer_1_number_1	AGTATCAACACCCATGCAAGCACTATGGCACTATCCACATTCTGTCCAATCCTGGTCTTCCTTGGTAGCACAAACCATA	0	0	0	0	0	1.09861	6.80683	6.80757	6.77878	4.22829	4.47734	4.73092	0	0	0	2.66259	3.31054	1.94591	7.38337	7.29528	7.17217	3.16969	3.03082	3.52046	0	0	0	0	0	0
122892_bclustnum_287_kamer_1_number_1	CACCTTATTTTGTTGGCAAACCAAACATTCTGCCACAACCTTTAACATCAGTTTTAAGGCCATCCCAAAAAAAATCCTTCTTGACTC	0	1.09861	0	2.8622	2.70805	2.5123	7.47022	7.53929	7.5868	5.87493	5.11048	5.39021	3.61765	3.82319	3.4889	7.84326	8.13146	8.13439	7.15011	7.22694	7.2677	8.51879	8.51814	8.51404	0	1.09861	0	4.68444	4.76217	4.84024
122893_bclustnum_104_kamer_1_number_1	TATATAAGATCATATCATCGCTGAGATAGGCATTTCCATACTCAGATTGAAAACTTTAACTAATTGACTATCTACTGTTCTGATACAGGATGCTTCG	0	0	0	0	0	0	6.81259	6.70836	6.75292	1.09861	2.36712	2.4681	0	0	0	0	0	0	5.84868	5.68698	5.94046	0	0	0	0	0	0	0	0	0
122982_bclustnum_46_kamer_1_number_1	TATCTGAAAATGCACATTAAATGAACATATAAGCTAACAGGACCTAACAATATACACATCATGATGATCACCGACAGGTAAATTAAGTACAACTGCAACATGAAGATAAAATAAATGGACTATATATAACTGAATAATGTTAAAAATA	0	0	0	0	0	0	3.18498	3.10009	3.68387	6.35809	6.93787	7.04653	1.34993	2.37158	2.19722	1.94591	1.29928	1.09861	2.31677	2.53658	1.60944	2.72275	2.26868	2.8792	0	0	0	2.76001	3.04452	2.75154
12299_bclustnum_162_kamer_1_number_1	CGAATGCTCCCACAACCTTCATGGGGATTATGGACGACATCTTGCGGCCATTCACTAACTCATTCGTAGTGGTGTACTTGACTCTATCGGTAAGACTC	0	0	0	0	0	0	3.51898	4.13517	4.03866	6.12176	6.7546	6.76849	1.34993	2.16905	2.42037	2.584	2.78809	1.55814	4.02535	4.21213	4.05612	1.83258	2.67415	2.42037	0	0	0	0	0	0
123013_bclustnum_90_kamer_1_number_1	CCACATCTCAACCTTGAGACAAGGCTGTTTTTAAGGCGGCGGACATGTTAAGGTCCTAACCCGCACATAGGTAGATCAATGTATTCGGATGTAA	0	0	0	0	0	0	0	0	0	0	0	0	0	0	0	6.26382	6.50079	6.4324	0	0	0	5.86521	5.95957	6.02075	0	0	0	0	0	0
123084_bclustnum_114_kamer_1_number_1	CATATTTCTTCCTCATGAAATATATCCATGTCTTTTTGAAAATCATCTATGAATGAAACATAATACAGAGATCCACCTAGTGAAGGGACCGATACAAGCCCAAACACGTCATTATGTATCAATTCTAGGATCCCTTTTTCCCTTGTAGCTTCATATGAAAATCTAACTTGATTT	0	0	0	0	0	0	0	1.60944	1.43508	3.86223	4.51286	4.04305	3.77893	3.63149	3.55535	6.70671	6.6857	6.85462	0	1.42139	1.09861	6.3571	6.36238	6.48092	0	0	0	3.41225	3.55094	3.69463
123085_bclustnum_67_kamer_1_number_1	AAAATTGCCAGAAAATTGTTTTGAACCAGTTGGAAAAGGTCAGTGGCCATCGATATCCACCTGTATTAGGTTCATATGACATACACTCTTGTCCCCACACATACGTTCTATGCAGTAGATGGAAGAGCGG	0	0	0	0	0	0	0	0	0	0	0	0	2.87168	3.34404	3.61861	6.49174	6.9095	6.94547	0	0	0	6.21993	6.3744	6.49979	0	0	0	4.06617	4.04305	4.02535
12308_bclustnum_197_kamer_2_number_2	ACCCACTATCAATGTACCATTGATTTTCTCACCTTTGCAAATAACGCTATCCCACAATTTTCAACCGGCGGTTCTTT	0	0	0	2.19722	2.56495	2.19722	3.51651	3.29584	3.21888	6.26937	6.56667	6.59519	0	1.60944	1.09861	1.60944	1.94591	2.19722	4.27203	4.26736	4.29826	1.94591	2.3979	2.3979	0	0	0	0	1.09861	0
123146_bclustnum_59_kamer_1_number_1	CTTTTATCACTAAACAGTGATGGAACATCCACTGCCAATGATCCATCTAGATCGGAA	6.71188	6.76849	6.80572	0	1.60944	1.09861	0	0	0	0	0	0	0	0	0	0	0	0	0	0	0	0	0	0	0	0	0	0	0	0
12316_bclustnum_210_kamer_1_number_1	AAGAAGGATTTGGGATTCCAAATGATTTTCTATATTAGTTTACACCGGGCAGGTTCGTCCCCAAGTTATCATGTCATAAGATAAAAGATGTGGAGGATAGGATGAAACAAAAATGT	0	0	0	0	0	0	0	0	0	0	0	0	0	0	0	0	0	0	0	0	0	0	0	0	0	0	0	6.63678	6.59491	6.52008
123192_bclustnum_3_kamer_3_number_2	AACGAGACATGGTGGAGAACGCTTTCTTTGGAGGCGTCTCCCCTTGCGCACTCAAGAGCGTCCTCTTGAGCTCTCTCTTCGGAGGCATCTTTGGTTGTGTACTTGAGAGCGT	0	0	0	0	0	0	0	0	0	0	0	0	0	0	0	0	0	0	0	0	0	0	0	0	7.0897	7.24637	7.18683	0	0	0
123192_bclustnum_78_kamer_1_number_1	GGAGGCTCTCCCCTTGCGCATTCAAGAGTGACCTCTTGAGCTCTCTCTTCGGAGGCATCTTTGGTTGTGTACTTGAGAGCGTCTTTGAGCT	1.09861	1.09861	1.09861	0	0	0	0	0	0	0	0	0	0	0	0	0	0	0	0	0	0	0	0	0	7.30167	7.40035	7.25064	0	0	0
1231_bclustnum_3118_kamer_1_number_1	TCTCATCCTTGCAGAAAGAGATCATCGTCATACAATAATGGTATGATAGGTTCATCATCCACAACCTTAAGGTAAAAGTTAGGAACAACTTTATTTCTGG	0	0	0	0	0	0	0	0	0	0	0	0	6.88674	6.89447	6.88837	0	0	0	0	1.09861	1.82455	0	0	0	0	0	0	0	0	0
12328_bclustnum_177_kamer_1_number_1	ACTTCGTATCTAATTCTCCTTCTTACAGTTCTGTGACTAATCCTGTCATGAGTTTACCTTCTTCAAGTATTCCTCCTGACATTTGTGAAGATAATAGTGTGGTTCCCTCCACT	0	0	0	0	0	0	0	0	0	0	0	0	0	0	0	0	0	0	0	0	0	0	0	0	0	0	0	6.70608	6.7794	6.83509
1232_bclustnum_2433_kamer_2_number_2	ATTGTGGATTATTATCATTATGTACATGACTCACTGATTGGATGGCTGCGGCCTACCTGGTCTTTTT	0	0	0	0	0	0	0	0	0	5.81328	6.90475	6.81924	0	0	0	0	0	0	0	0	0	0	0	0	0	0	0	0	0	0
123359_bclustnum_36_kamer_1_number_1	CCTTGTTATAAAGGTAACTAATATGCCTAGGAGTCATACAAGAGATAAGCATAACAACTAAGTACATGTCCACCAATAGTGGATTATCCTCCATTGTGCATGAATGTACGTGCAACA	6.5241	6.56974	6.56052	0	0	0	0	0	0	0	0	0	0	0	0	0	0	0	0	0	0	0	0	0	0	0	0	0	0	0
123432_bclustnum_99_kamer_16_number_7	AGAAAACTAAGACAAAATGATGGAGAAAAGGACGGAAGACATGATTCATGAGGCTTTGGAAGGGGAATTCACAGGCAAAGA	0	0	0	0	0	0	0	0	0	0	0	0	0	0	0	7.13261	7.15047	7.06757	0	0	0	7.21008	7.28021	7.23304	0	0	0	0	0	0
123482_bclustnum_101_kamer_9_number_2	GCAAACAAAAATTTCCCCCCTTGGCCTTGTGATAGGTTTTCAAAAATCCCGAGTGCCCTCCTACCGGA	0	0	0	1.09861	0	0	5.00841	4.78868	4.9116	2.53898	2.59525	2.44235	0	0	0	7.31617	7.77599	7.78649	5.39059	4.9158	5.3505	7.82787	7.89799	7.85394	0	0	0	2.83321	2.60269	3.39451
1234_bclustnum_3908_kamer_1_number_1	GACACCTGTCTGACCATTTCCCCTACCCGTTATGCATTTAATCCCCTAGAAAATTACTCTTGTATTATCACAAAACATGACAACTGGTTCTTTGATTTCAACCTTCATACCTTCCAATAACTGTTTAAACCAACCAATGTTAAACAAT	6.79772	6.72167	6.69332	0	0	0	1.60944	1.09861	1.09861	0	0	0	0	0	0	0	0	0	0	0	1.09861	0	0	0	0	0	0	0	0	0
12350_bclustnum_6550_kamer_1_number_1	CCTATGATTAATAACACTTTGGTAATTTTAATATTGTAAATTGATTACAAATTATAGTCATTGAAGTGGAGGG	0	0	1.60944	0	0	1.09861	6.54933	6.6548	6.60834	6.32794	5.8865	5.86889	1.60944	1.09861	2.19722	2.3979	2.56495	3.13549	7.64731	7.72974	7.28262	3.45947	3.18635	3.15274	0	0	1.09861	0	0	0
123582_bclustnum_38_kamer_1_number_1	AAACACTTCAAATATCTTATTATTCTTTTGATTGCCATCATGTGATTTTCTCTTGGTTTTTCTAAAAATCTTG	6.8301	6.80667	6.76141	0	0	0	0	0	0	0	0	0	1.09861	1.09861	0	0	0	0	0	0	0	0	0	0	0	0	0	0	0	0
12360_bclustnum_241_kamer_8_number_2	GACAAGGCAATAAGCAAATATATAATGAAGATCAACCCAAGAACAAAAAGCAAAGAACA	0	0	1.09861	0	0	0	0	0	0	0	0	0	0	0	0	0	0	0	0	0	0	0	0	0	0	0	0	7.33346	7.34084	7.34343
12360_bclustnum_745_kamer_1_number_1	TTCATTTAAGATTTTATTCCTATGCTCAAAAACCTTGGAGAGAAGCCTCCGGAGCTCACTATAATTTTGACATATTAAAAGGTTAGGAAGGTAGTATT	0	0	0	1.09861	0	1.09861	7.08961	7.13454	7.08087	5.53163	5.28433	5.3799	3.04452	2.80672	2.89653	0	0	0	6.37085	6.7921	6.4459	1.60944	0	0	0	0	0	2.93268	3.22772	2.83321
12360_bclustnum_836_kamer_1_number_1	ACATAAGCAAATGCAAAGAACAAGAGACACAAAATGCACAATGAAGATCAACCCAATAACAAAATTTATCCTGGACACCT	0	0	0	0	0	0	1.09861	0	0	0	0	0	0	0	0	0	0	0	0	0	0	0	0	0	0	0	0	6.81783	6.75188	6.81892
123716_bclustnum_5_kamer_1_number_1	ACTCTCAAATTTTATACATTGTGTCTCTCCATGTTGGGTGCCCGCCCTGGCTGCAGCCCTTGCGCCGCTCGCACCGCCCCCCCTTGGGAGCTGGTTCCTAGACCACAGGCTAAGAATGTTATA	0	0	0	0	0	0	6.81235	6.76688	6.85835	0	0	0	1.94591	2.36085	1.94591	0	0	0	3.83298	4.09767	3.36038	0	0	0	0	0	0	0	0	1.09861
12376_bclustnum_1160_kamer_1_number_1	AATCGAGGTATGAGGTATTCCAAAGGCCCTAACACCCACAGACTAAGCACCTGGTCATAGCCCTCGAGCACACGA	0	0	0	1.94591	2.03688	2.30259	6.57662	6.5157	6.48667	0	0	0	0	0	0	0	0	0	3.97029	4.81399	4.61732	0	0	0	2.3979	1.94591	2.19722	0	0	0
123771_bclustnum_12_kamer_1_number_1	CACATTTTCTAAAAAGTCGTGTATTTTAAGAAATCGTGTAAACCTTATAGAAGCTGTGATTTTTAAAAATGTCGGAAGTAAGCTATCAACTCAAAGA	0	0	0	0	0	0	0	0	0	0	0	0	6.87987	6.88013	6.89264	0	0	0	0	0	0	0	0	0	0	0	0	0	0	0
1237_bclustnum_5321_kamer_1_number_1	GTGAAGGCAAAAACAGGTGGGTCTCGCATGCTCCTCTTGCCAATTGACCAGCAGTGAGTGCCAA	0	0	0	0	0	0	0	0	0	0	0	0	0	0	0	7.38776	7.28874	7.25399	0	0	0	7.36143	7.41189	7.3819	0	0	0	0	0	0
123805_bclustnum_35_kamer_1_number_1	CAAGTGCCCGCCCCGACTTGGCAAGTGCGCGCCCAGAATCGGGAAGGGGGCCCCCACACTTTCCAAAGACCGGGCG	0	0	0	0	0	0	0	0	0	0	0	0	0	0	0	0	0	0	0	0	0	0	0	0	0	0	0	6.70389	6.76339	6.68978
123848_bclustnum_42_kamer_1_number_1	ATAAGGTGACATGCAAGTGGTCAAAAATTCAAAGTTTGCTCACACATGTGTGAGCAAACTTGAGAAGAAGAGTAGGAGACAAGAGTGCAAGGGAGAG	6.6936	6.66029	6.67554	0	0	0	0	0	0	0	0	0	0	0	0	0	0	0	0	0	0	0	0	0	0	0	0	0	0	0
12385_bclustnum_352_kamer_1_number_1	GGTACCTGATGTCGATGTGTTTGGAACTATAATGAAATAATGGATTAACCGAGAGCTTAATGCAGATCGGAAGAGCGTCGAATAGGGAAAGATGTAGA	0	1.09861	0	0	1.09861	0	1.09861	0	0	5.65638	6.50493	6.47631	0	0	0	0	0	0	2.48491	2.07944	2.94444	0	0	1.09861	0	0	0	0	1.09861	0
123908_bclustnum_9_kamer_1_number_1	AGCACCTAGAGAGCGCACTCGAGAGCATTCTTGAGATCGCACTAGAGAACGATCTCTTCGGAGACGTCTCTGGTTGCGTACTCGAGCGCGCTCTGGAGAGCACCCTCG	0	0	1.09861	0	0	0	0	0	0	0	0	0	0	0	0	0	0	0	0	0	0	0	0	0	6.32257	6.59469	6.3081	0	0	0
123917_bclustnum_48_kamer_1_number_1	ATGAATTCCTAGAGCTAAATTATCAATATTTTCTTTCAAAGTATCTATGTTAGGTCCCTATATTACTATTATAGTCCCTTATTGTTGTTAGTGTAACCCCCTTAA	1.09861	0	0	0	0	0	1.67398	1.34993	1.09861	6.69679	7.05384	7.04516	0	0	0	0	0	0	0	1.09861	1.60944	0	0	0	0	0	0	0	0	0
123917_bclustnum_60_kamer_1_number_1	TCAACTATATCCCATGCCTCATTCTTACCAAGGATCCATTTCTTCAACCATGGCCTGGTTC	0	0	0	0	0	0	0	1.09861	0	0	1.09861	0	0	0	0	6.53282	6.54679	6.50279	0	0	0	6.77878	6.8222	6.84268	0	0	0	0	1.09861	0
123923_bclustnum_46_kamer_1_number_1	CCATTTAATCAAATACAATTGCTACTGCATTTACGGAAACAATTCAAAAGCTACATTGAAACCCAAAGATTATTGTCAGTGACAGAGATCCTATTTTCACAGGAAATTTTTGGACA	0	0	0	1.09861	1.09861	1.22378	7.90942	7.86735	7.87076	6.80229	6.82802	6.79479	3.00928	3.11598	3.21888	3.18935	3.054	3.62555	7.39828	7.59456	7.55719	3.0869	3.11149	3.57592	0	0	0	2.41591	1.81011	1.91365
123_bclustnum_0_kamer_1_number_1	GGGTTAATCGGCCAAGAAAGCGGCATGGTCAATATAACCAGTAGTGTTAACAGTCGGGAGAGGAGTGGCATTAACACCATCCTTCATGAACTTAATCCACTGTTCACCATAAACGTGACGATGAGGGAC	0	0	0	0	0	0	0	0	0	0	0	0	0	0	0	0	0	0	0	0	0	7.37827	7.19618	6.9643	0	0	0	0	0	0
123_bclustnum_4792_kamer_1_number_1	GCAGTGTAACAGTCGGGAGAGGAGTGGCATTAACACCATCCTTCATGAACTTAATCCACTGTTCACCATAAACGTGACGATGAGGGACATAGAAAGTAAAAATGTCTACAGTAGAGTC	0	0	0	0	0	0	0	0	0	0	0	0	0	0	0	0	0	0	0	0	0	7.77145	7.6907	7.42031	0	0	0	0	0	0
124004_bclustnum_29_kamer_1_number_1	ACCTTCGTCTATTTGCTACCTGTCCTGGGGGTAGGAAGTCCTTAGTTTATACAATTAAGATGTTGAGATCGGGAGAGCACACGTCTGCACTCCAGTCACCGATGCATCT	3.2581	3.38099	3.77276	2.8094	6.86554	6.52893	2.98568	3.06339	2.28238	1.29928	3.69387	3.8416	0	0	0	0	0	0	0	1.09861	0	0	0	0	2.15176	5.41075	3.02529	1.94591	2.07944	1.50408
124014_bclustnum_72_kamer_1_number_1	GTAAGGGATTGGCCACCCCGCCTAGTCCCGAATAGAGACAGGTGTTCGCCTCTGTTAGGCAAACTAGCAAGGAAGTATATGTCGGAAGCCTCAATCTCGAGTTGAAGGCCTCCAATATAGAAACACGATCCTAACATGCCACCTCTCGACCT	0	0	0	0	0	0	1.50408	0	1.50408	0	0	0	0	0	0	0	0	0	6.72812	6.68622	6.53876	0	0	0	0	0	0	0	0	0
12402_bclustnum_124_kamer_1_number_1	ATATAGTCATATTATATGAGTTGCGGGATGCTATTTGTGGATGGTTGTTCAAGTTGGAAAAATAGATGGACTTATATTTTTAGACATGTCGATCATA	0	0	0	0	0	0	4.61264	4.9158	4.7185	6.36781	6.6047	6.55156	0	0	0	0	0	0	5.35422	5.337	5.37167	0	0	0	0	0	0	0	0	0
124065_bclustnum_42_kamer_3_number_2	TGTGAAGTAAGCAAATTCAAGAAAGTAAGAGGCATTCCTAACATAAAGAAACCTGAG	7.07242	7.09064	7.0507	0	0	0	0	0	0	0	0	0	0	0	0	0	0	0	0	0	0	0	0	0	0	0	0	0	0	0
12406_bclustnum_978_kamer_1_number_1	CAAACAAAGATAATTTTTCTTCCTTTAATGTCATGAAAATCATGACTTATAAAATACAAACATGATGAACATGCTGGGAAAAGGGGATATATCCAAGGAACCGTATGATGTAATTGTCAACTTATGCAAAAGATGTTCAAGGGGAGCTGCAAGAAACAAATCGAATAGCA	0	0	0	1.09861	0	0	2.12823	2.30259	2.12823	1.38629	1.09861	1.09861	0	0	1.09861	6.39465	6.45808	6.55173	2.99906	2.66616	3.33545	6.66717	6.75873	6.81235	1.09861	0	0	0	0	0
124116_bclustnum_4_kamer_1_number_1	ATAAGTTCAACTGTGTGATAAATTTATATCTTGCATTATTAACGTGTTGATATTTTTAGGTTCATCCTATGTGTTGTAGGGAAAAGTATCCGATTCGGATGACCCTATCCCACTCTAAGTGTGACCAGACAATCATACTAAAGTGCTACAGAAGGAAGGAGAGAACGTCTATTGCCCA	0	0	0	0	0	0	6.53233	6.57428	6.58262	0	0	0	0	0	0	0	0	0	0	0	0	0	0	0	3.43399	3.52215	3.84405	0	0	0
124153_bclustnum_332_kamer_1_number_1	TGGAACATGGTTCGATGTTGAATCCATACAACATGGGGGATACCCAAGTTGATACATGTGGGCGAAGATAGTTTTCAAATTCATTAGTTGTATATTCTCTTCCATTGTTAGTACAAAGAGTGCCAATATGTGATTGTGCTTCATTTTGAATC	0	0	0	0	0	0	6.02972	5.88888	5.8659	3.32504	2.70805	3.11795	3.53612	3.21888	3.24259	2.35138	3.50255	3.21084	6.31355	6.36681	6.51678	2.61007	2.99573	2.8792	0	0	0	2.93268	2.8792	2.73437
124156_bclustnum_46_kamer_1_number_1	AATTCCAAGATTGACTACAATTCTACTACCATTGAAGAAATGATGATCAGTCAACTCTTGGAAAAGAAGGCTAGGAAGAAGCAGCTTAGATCTGAAAGAG	7.0007	6.85414	6.9464	0	0	0	1.09861	0	1.09861	0	0	0	0	0	0	0	0	0	0	0	0	0	0	0	0	0	0	0	0	0
124190_bclustnum_143_kamer_1_number_1	CCTTAATAATTGGGAAAACCTTAAGGATGACTCAAGGAATTATTATGAAGATATGGTATAAAGGAAAATGTTTTCCTTAA	6.85435	6.86223	6.89467	0	0	0	0	0	0	0	0	0	0	0	0	0	0	0	0	0	0	0	0	0	0	0	0	0	0	0
124222_bclustnum_4_kamer_1_number_1	GTTAAAGCGCTGAATTGTTCGCGTTTACCTTGCGTGTACGCGCAGGAAACGCTGACGTTCTTACTGACGCAGAAGAAAACGTGCGTCAAAAATTACGTGCAGAAGGAGTGATGTAATGTCTAAAGGGAAAAAACGT	0	0	0	0	0	0	0	0	0	0	0	0	0	0	0	0	0	0	0	0	0	7.69729	7.65273	7.38794	0	0	0	0	0	0
12424_bclustnum_1415_kamer_1_number_1	AATGACCATTTTTGGGTTATTACATTTTCCCCTCTTTGACTAATGTGTGATTGGTCTAGGAACATAAATCCCTGCAAAAATGATTTATATTTTTCAGAATTTAAAATAATA	6.34689	6.46124	6.53185	0	0	0	0	0	0	0	0	0	0	1.09861	0	0	0	0	0	0	0	0	0	0	0	1.09861	0	0	0	0
124250_bclustnum_47_kamer_18_number_2	CTAGCTCCGAACTTCCCCCTTACCCGAATTTCCAACTTAGTTGCAGCTACCTTCTTGGCTTCTCGCCTTAGCTTTTTTA	0	0	0	0	0	0	0	0	0	0	0	0	6.51693	6.48387	6.53959	0	0	0	0	0	0	0	0	0	0	0	0	0	0	0
124283_bclustnum_25_kamer_1_number_1	TCATTACGTGAACAATGGGATCGCGATACCGTGGTCAGGGACAGACATCCGTGGGGGGGAAAACCACGTATCGCTCTATTCCCACAATCTCACCCGTCACCACCATCCCCCCTATATATGTTGATTGGGTCAGG	1.46634	0	0	0	0	0	0	0	0	0	0	0	0	0	0	0	0	0	0	0	0	0	0	0	7.57838	7.91135	7.52315	0	0	0
124298_bclustnum_144_kamer_1_number_1	CAACTAATGGAATAAAGCCGACATAAATAAAATAACACACTAATTAATATGCCTTAATTAATGGGTAATGAGCCAATATTAGGGATTAACATGCCCCTCCCCTTGACACAAGTGTTGTCTGCAACACTTGAGTAACTTTGGATGCTTTTGTATAAAAGACGCATCTTTCCAAGTGGAATCTTCAA	0	0	0	0	0	0	2.74727	2.45101	3.51453	2.8006	2.22462	2.5819	0	1.38629	0	6.14683	6.52993	6.5612	3.22684	3.10009	2.91235	6.14077	6.14532	6.25823	0	0	0	4.08429	3.68387	3.07269
124326_bclustnum_20_kamer_19_number_2	CGGGAAACCCAACAGACAGAAAGAGCACATAAGGGGGGATCTTAGTATCGATCTACAACTG	0	0	0	0	0	0	4.67594	4.48864	4.50351	5.82502	6.5333	6.58617	0	0	0	3.93834	3.80666	3.72167	4.2485	4.36522	4.36522	3.57422	3.70541	3.885	0	0	0	0	0	0
124341_bclustnum_119_kamer_1_number_1	TGGCACGTGAGTGACTGGCAATGTTTGATGAAATGGTCGAATGGTGTATTGACA	0	0	0	0	0	0	6.10776	6.13988	6.02345	2.32239	2.5123	2.68102	0	0	0	0	0	0	6.93049	6.85154	6.64991	0	0	0	0	0	0	0	0	0
124353_bclustnum_90_kamer_1_number_1	GACTCTCTGATTCAAATAGGGATTTCGCGTTTCGCAAATCCTTGGAACTCCGCCTATCGACTCT	0	0	0	0	0	0	6.33997	6.51545	6.51175	0	1.60944	1.60944	0	0	0	1.09861	0	0	4.03424	4.16278	4.28435	0	0	0	0	0	0	0	0	0
124357_bclustnum_47_kamer_1_number_1	TACGGCATCTCCTTAAACCCAAAGAAGTCCATTTTCGCAGTAGAACAGGGTAAACTACTGGTTTTTTGTGTCTA	0	0	0	0	1.09861	1.79176	6.31536	6.24514	6.36087	4.59006	4.96109	5.13727	2.56495	1.79176	2.22462	6.52978	6.40026	6.30124	6.45205	6.50728	6.39735	7.28225	7.23183	7.26944	0	0	0	2.61496	1.90424	2.56495
124584_bclustnum_64_kamer_1_number_1	GTCAAAATGACGCGTCTTAGATTAGTTAAAAACGTGTATAAAATAGGCACCTTTTATGTGATTCGCTTGTTGCTCGTTGTATGGCTGTTGCGATAGTTATCATACCATTGTATTTTCTCAACAAGAAGGCATTGACTACACTGAAACCTTTTCCCGTGTTGCAAAAATGAACTATGTTCGATTGATTCTTTCGCTT	0	0	0	0	0	0	6.61458	6.50966	6.81427	1.67398	1.09861	0	2.16496	1.76766	2.04769	2.00747	1.60944	2.54771	6.68503	5.89072	6.71901	1.46634	1.09861	1.38629	0	0	0	2.11021	2.31677	1.54045
1245_bclustnum_2403_kamer_1_number_1	AAAGAGGATATAGTAACAGAGTTGAAGAGAGATAGAGTGATGGGGGAAGAGA	0	0	0	0	0	0	2.00148	1.75786	2.00148	5.43372	6.63568	6.68286	0	0	0	0	0	0	1.09861	1.82455	1.6864	0	0	0	0	0	0	0	0	0
124677_bclustnum_7_kamer_1_number_1	AGAGTTTATTCATGGAAGTATAAGACTCTGATAAAGAAGACTCCGAAGAAGA	0	0	0	0	0	0	0	0	0	0	0	0	0	0	0	6.27702	6.07351	6.20617	0	0	0	6.63621	6.59167	6.608	0	0	0	0	0	0
124702_bclustnum_20_kamer_1_number_1	CTTTATATGATAAGTAATAGTTACATTCTTTACATTACCAACTGTACGATATGCTGAATGAGTGAGCCCAGGAATCAGGAAT	0	0	0	0	0	0	0	0	0	0	0	0	0	0	0	6.49254	5.68188	5.82821	0	0	0	6.68399	6.70686	6.15326	0	0	0	0	0	0
124722_bclustnum_350_kamer_3_number_2	TTCTTCTCCTTCTTCTTCAAGTTCAAAATCTAATGGGAAAAGAATGTACTAAACATAAA	0	0	0	0	0	0	0	0	0	0	0	0	0	0	0	5.85603	5.80814	5.92069	0	0	0	6.56995	6.60665	6.61517	0	0	0	0	0	0
124723_bclustnum_117_kamer_1_number_1	CTAATGCTCCTTCCCTATTTTTGACATAAACCTTATCAATACTCCCACTGCATGTGCATTGTTTGATTTATTATAGACCATCCCATACATCGGCTAT	0	0	0	1.60944	1.09861	0	6.92897	6.95283	6.85938	6.50777	7.19302	7.11883	1.7346	2.24071	1.79176	2.69313	1.41369	1.46634	7.80778	7.83382	7.76486	2.45674	2.12026	2.09323	0	0	0	1.09861	0	0
124753_bclustnum_67_kamer_1_number_1	TCACAGTATCAGTGTATATTCCCGACAGTCGCAAGACTGTTGTGCGATGGGATATCAAGTTTCAGGGGGAGGAAGGAATCGGGAGAGCGTCGTGTAGGGAAAGAGTG	0	0	0	0	0	0	3.24147	3.3373	3.49651	6.06935	7.16858	7.18083	0	0	0	0	0	0	5.08605	4.84222	4.72345	0	0	0	0	0	0	1.43508	0	0
12476_bclustnum_208_kamer_6_number_2	CCATATATGGAAAACTTGAAGGCGATTTTATCAATAATATAACACGTATATATA	0	0	0	0	0	0	7.3433	7.39498	7.24551	1.82455	2.8792	1.88707	5.83305	5.67057	5.8189	0	0	0	5.74236	6.17254	6.3675	0	0	0	0	0	0	4.35927	3.92395	3.91602
12477_bclustnum_71_kamer_1_number_1	GATAACGAGGAGAATTCAATGAGGATTGTAAGCAGGCAGGGATTAAGAGGGAGTTAACCTCTCCTTACAACCCTCAGCA	0	0	0	0	0	0	0	0	0	0	0	0	0	0	1.09861	0	0	0	0	0	0	0	0	0	0	0	0	7.36344	7.30888	7.35068
124867_bclustnum_79_kamer_1_number_1	AGACATATTTGATAGTATGAAATGTATTTATGATGGTCTTTTAAAATTTTGAAAAATGGCAATGTTTATGTTGAAGTGGTGACTTTAAGCTTTTGAACAATGACAATATTTACGCAAAATTGAAATTGCAATTTGAGATTTCAATTGAATTTCAA	0	0	0	0	0	0	1.09861	1.09861	1.70475	1.60944	0	1.09861	0	0	0	0	0	0	1.56398	1.09861	1.09861	0	0	0	0	0	0	7.6014	7.601	7.32075
12489_bclustnum_47_kamer_1_number_1	ATCTCACACTAGTAATGATTCAACAAAATTAGAGAAGCTCCTTATGATTATGAAGACGATCAAATGATGT	0	0	0	0	0	0	0	0	0	0	0	0	6.59285	6.6536	6.65065	0	0	0	0	0	0	0	0	0	0	0	0	0	0	0
124958_bclustnum_139_kamer_1_number_1	GGTTAAAAGGTTTTTCTATCGGGGGACATGAGACAACGACCTACTTGTGTGTTTGTCCCCTAGGGTTTTGATTCAACAATATTTATAAATAGATGCAAGAAATTAACTACACCATTCAATCAAGCAGTTTTGCAGAAAAATACTTACAAATCATCAAGAA	1.09861	0	0	0	0	0	0	0	0	0	0	0	0	0	0	5.46242	6.87475	6.30103	0	0	0	6.04579	6.12001	6.02345	0	0	0	0	0	0
12498_bclustnum_21_kamer_1_number_1	CATCACTCTAACATCAAAATCATGTATACATCTAGCATGTATTCTTACTAATACATC	0	0	0	0	0	0	0	0	0	0	0	0	6.56386	6.63726	6.55203	0	0	0	0	0	0	0	0	0	0	0	1.09861	0	0	0
124_bclustnum_2824_kamer_1_number_1	TCCATAATCTTTGTTCTACTTACGAGGTATGTTGTACATAACCAAGTAGGTATACTAATCCAGTGGTACAGAATGAATAGAAGTTCAAAAGACATACAGAGATCA	0	0	0	0	0	0	0	0	0	0	0	0	6.56131	6.56752	7.0775	0	0	0	0	0	0	0	0	0	0	0	0	0	0	0
125026_bclustnum_46_kamer_1_number_1	GAAGTTCAAAAAATTTGGCATTAGAAGAGTTGGTTACAAAGGCTTAAACATCCCAAACCCTATCATGTTTCATGGATCAATATGAGAT	6.61941	6.65351	6.60462	0	0	0	0	0	0	0	0	0	0	0	0	0	0	0	0	0	0	0	0	0	0	0	0	0	0	0
125056_bclustnum_18_kamer_1_number_1	AGAGATCATGGACCAATCCGGTGTTAAGCCACGGATCAAGGTTAGGTTTGATCTAAGAGAATTTGAGCCGTCGAATCACTCTATGTCGAAAATATCG	0	0	0	0	0	0	3.23475	2.30259	2.8622	3.41773	2.48491	2.83321	6.50212	6.46994	6.53427	2.12026	2.56495	2.64696	2.82006	2.89037	3.01694	2.64696	2.22162	2.56495	0	0	0	1.94591	1.09861	1.09861
12511_bclustnum_1838_kamer_1_number_1	GATTCGTGCAATAAAGAACTCTCATGTTGTTCTGCATTACTCGGCTCCTAAGTCAATACTGATGCTCAGAACTTGATGTTTTCTGTGTAACTCGCACCTGT	6.56357	6.5442	6.58452	0	0	0	0	0	0	0	0	0	0	0	0	0	0	0	0	0	0	0	0	0	0	0	0	0	0	0
125152_bclustnum_44_kamer_1_number_1	TTATGATTAACCTTGACTAACTTAGTTCATAGAATGAAATAAATAGCATGAACACAAGTGACACCAATATTTAATGTGGAAACCCA	6.80073	6.78841	6.76331	0	0	0	1.09861	2.19722	1.94591	1.20397	1.94591	1.60944	0	1.60944	0	0	1.09861	0	1.09861	1.09861	1.09861	0	0	0	0	0	0	0	0	0
125174_bclustnum_119_kamer_1_number_1	GCATTTTCTGTACTTAAGGAAAGTTGGGCTTGTATACATCTTTTAAGTACCTTCTCAAGGTTTTCCAGTGCTTCCTGAAAAGAAACACCATAAGGAGT	0	0	0	0	0	0	1.09861	0	0	1.09861	0	0	0	0	1.09861	6.16238	6.4349	6.29465	0	0	0	6.54583	6.49945	6.52291	0	0	0	0	1.09861	0
1252_bclustnum_3215_kamer_1_number_1	AATACATTAACAGAGGCGCTAGCTAACTATGTGTTAGATAGACATTTGAACAATTTATAAATCAAACACACGTACACAAATGTAAAGTAAGCCGGTAAAAACCATGTATATATAACGATCAAATTTTTTTGTTACAAAATGTGTCCGAAGACTAAAAATATAAAAAATGGAAGCTCATGGATTCTACATACAATA	0	0	0	1.60944	0	0	6.64991	6.61377	6.60877	0	1.09861	0	0	0	0	3.26236	3.38627	3.43399	4.53567	4.76704	4.85091	2.99573	3.06027	3.16407	0	0	0	1.60944	0	1.52606
12533_bclustnum_2862_kamer_1_number_1	AACCCGCGGAAGCTGCACACAAAAATCCAACAAATATCATGACATATTTCAAAACCCAAGGCAGGCATA	0	0	0	0	0	0	0	0	0	0	0	0	0	0	0	6.8542	6.61607	6.66532	0	0	0	6.80128	6.78397	6.83718	0	0	0	0	0	0
1253_bclustnum_1227_kamer_1_number_1	TCTCAAGACGATCTCCAATGCGCTCTCAAGGGTGCTATCCAGAGCGCTCT	1.09861	0	1.94591	0	0	0	0	0	0	0	0	0	0	0	0	0	0	0	0	0	0	0	0	0	7.88239	7.95262	7.81577	0	0	0
1253_bclustnum_2195_kamer_3_number_2	GCCAGACACACGGAAGATCCATCTTATGCTAAGCAATCAGAAGTAGATGCAAC	6.71198	6.69283	6.69777	0	0	0	0	0	0	0	0	0	0	0	0	0	0	0	0	0	0	0	0	0	0	0	0	0	0	0
1253_bclustnum_8567_kamer_1_number_1	GTACGGTCAGTTGTCCTTTAAAATTTGGAGAATTTGTTGTTGATTCTCGATGTGATCTTCCACTGCCTGAACCT	0	0	0	0	0	0	3.86822	3.71357	3.46126	3.80029	3.99689	4.13859	0	0	0	6.71988	6.61185	6.62823	3.61861	3.62624	3.24147	7.00657	6.938	6.89322	0	0	0	0	0	0
125416_bclustnum_46_kamer_1_number_1	CAAAGGGTGCTAACTCTGGCCAAAGCACATGGGCACATCCCCCGACGGTTTTTAACAACGCAGAGCCCCTGGCGGCGGCCCCTTATAGCAAGAGCATAA	0	0	0	0	0	0	0	0	0	0	0	0	6.95219	7.00337	7.01959	0	0	0	0	0	0	0	0	0	0	0	0	0	0	0
125469_bclustnum_161_kamer_1_number_1	ACATTACTTCTCCCTCTACAACATTACAGATGACCTGGCCAAACTTCGGTATGGTGTTCTCCATCTTGATCAAGAGCGCTGGCAATGGAGAAAAGCTTCCCGTCAAGGATATATTGCTTAGACCCAATTGTTGCTAG	0	0	0	0	0	0	0	0	0	0	0	0	0	0	0	6.65247	6.63463	6.48134	0	0	0	5.76808	5.57973	5.54668	0	0	0	0	0	0
125603_bclustnum_62_kamer_1_number_1	CAGTTGAGAAAGACTCATTCAAAACTCCCTATGAATTATGGTATGGCTACAAACCCCATGTAAGTTATCTAAAAGTATTTGGAAGCAAATGTTATATTTTGA	6.83238	6.87461	6.84033	1.09861	1.09861	1.09861	1.60944	1.94591	0	1.09861	1.60944	0	1.09861	0	0	0	0	1.32176	0	0	1.09861	0	2.19722	2.3979	1.60944	0	0	2.94444	3.66356	3.04452
125606_bclustnum_18_kamer_1_number_1	CCAGCTACAGAGAACTGTCTTTTTATGCCATTTTGTTCACACCATTCCCGCAATTCATCTGATGTATATTCTCCTCCTCGACCAGATCTGAGACACTTGATTTTAGA	0	0	0	0	0	1.09861	1.35812	1.35812	1.4816	6.36956	6.65929	6.54908	0	0	0	3.49043	3.31054	3.17805	1.09861	1.09861	1.09861	3.70868	3.47816	3.85862	0	0	0	0	0	0
125662_bclustnum_98_kamer_1_number_1	TTATAGGTTTTTTGGGTGAATTAGTTCATTTTTTACCATGAAAAGATGTTTTTCGATGAATTTTTGCCTATTTTAAGCAGGTATGAGCAATCTTGATCCGAAACTGATCAAGTGCAAAATCAGTTCGAAAGGGATAAAAAGACAAAGTTTGCTAAGCATGTGGATGGGCCAGAAAAAGGACTATGTTTGCTGGTTCAA	0	0	0	0	0	0	6.51767	6.42234	6.41546	0	1.09861	0	0	0	0	1.76359	1.09861	1.09861	0	0	0	0	0	0	0	0	0	1.09861	1.09861	0
12578_bclustnum_1432_kamer_4_number_2	GCTGTGTCTTTCCGTGCAGAATCTGTACAGTCCGTACATGCAGTTCTGGCACATTTAGATCG	0	0	0	0	0	0	2.19722	1.60944	2.43361	6.85048	7.00579	7.0298	0	0	0	4.65776	4.96004	5.04343	2.4681	1.75786	2.32239	4.77238	4.91998	4.95159	0	0	0	0	0	0
12578_bclustnum_1984_kamer_1_number_1	ATCATATAATTGTCGCAGTAGAAGATGATACGTTGATAGGAGGGAAAGGAAAACTGTCCAGTCAGCCAGAATCTTTAACTAACCTTACACCAACATCCCGATAATGGATC	0	0	0	0	0	0	0	0	1.50408	0	0	0	0	0	0	0	0	0	6.50069	6.3889	6.3956	0	0	0	0	0	0	0	0	0
1257_bclustnum_4716_kamer_1_number_1	TATAGATCAAGCATGGATCTGATGGAAGTGCTGAAAAGATCTAGGCAAGATTCGTTGCCTGAGGCTTCTCTCAAAAGGAAGGCATAGACTAGATGATT	2.46385	1.7492	2.44235	0	0	1.09861	4.63041	4.48614	4.69947	6.18461	6.43988	6.5604	2.05412	2.56495	2.8792	0	0	0	5.18241	5.04772	5.03911	0	0	0	0	0	0	1.50408	1.09861	1.09861
125829_bclustnum_96_kamer_1_number_1	ACGGATTTGTAGTTTGGTGCGGCGCTACTGGCTGTTGGATCGAAACGGCAGGCATTGTGGAGGGC	0	0	0	0	1.09861	0	0	0	0	0	0	0	0	0	0	0	0	0	0	0	0	0	0	0	0	0	0	6.98749	7.07713	6.92284
12583_bclustnum_769_kamer_1_number_1	GCATTGGCTAGTTGACAATCTGTCTATTTCGGTATGAGTTTTAGAATTTTATATAAATCATTTTGTGCGGGGCACGCTATA	0	0	0	0	0	0	0	0	0	0	0	0	0	2.25129	1.09861	5.95404	6.61256	6.54214	0	0	0	6.0665	5.95244	6.07955	0	0	0	1.09861	0	1.09861
125946_bclustnum_44_kamer_5_number_2	GGTTTGTGTTAGAACCAAATACCAATATAGCATAGAAAATCCTCAGAAAAAGTACTCA	0	0	0	0	0	0	0	0	0	0	0	0	0	0	0	6.1978	6.53524	6.53621	0	0	0	6.2634	6.31476	6.37559	0	0	0	0	0	0
12605_bclustnum_1160_kamer_1_number_1	AAAGAATAAAAATGCCTAGAAGTTATTAAGTCTACTTAGGAATGGGAAAGGGTAACCGTAGAGGTACTTCCTAGTGGTACTAGGTAGCCCCAAGTCACTTGGTCAACAACTTGTTAACA	0	0	0	0	0	0	0	0	0	0	0	0	0	0	0	0	0	0	0	0	0	0	0	0	0	0	0	6.55406	6.56206	6.54835
126073_bclustnum_30_kamer_1_number_1	AATACATAAAAATAAATATAACTTAGTTCACCTTTCACCTCCCAAAAGTAACGAGATCG	6.50698	6.35321	6.43562	0	0	0	0	0	0	0	0	0	0	0	0	0	0	0	0	0	0	0	0	0	0	0	0	0	0	0
126093_bclustnum_67_kamer_12_number_2	ACTCTTTATGCAAAGAACACCAGCTGAAATAGCACACGATTGTCTGTCCTATGTACATA	0	0	0	1.09861	0	0	6.58018	6.57088	6.59942	0	0	0	0	0	0	0	0	0	3.92527	3.94481	4.32634	0	0	0	0	0	0	0	0	0
1260_bclustnum_2994_kamer_1_number_1	TTCTACGATGTGGAAGTCTGAGTTCAATGTCCCTTCATCGAACGCCATGCTCCTTACTTATACGCATCCTTTCTATGTTTGTCTCATAGTGCAAACACTAGTAACCAAGACGGAAAACCCCATAACTTTCTCCCAAGGACATGCTTTCGGGGATAACAAGGGTCGGCTCCGTCAACATGCAT	0	0	0	0	0	0	3.885	3.85015	3.93538	0	0	0	0	0	0	0	0	0	6.53569	6.10015	5.65303	0	0	0	0	0	0	1.81529	2.19722	2.26868
12612_bclustnum_233_kamer_1_number_1	TCGAAGTCTATTTTTAGACTGCCTGTCTAAAAATAGGTCAGTCAAATATTATTAGCCATTAATAATATTTGGACTCTAACTTCATTTATTCTCTTACAACACTTCAG	0	0	0	0	0	0	2.45674	3.20883	2.90417	6.1506	6.62619	6.6526	0	0	0	0	0	0	2.36085	2.61007	2.36085	0	1.09861	0	0	0	0	0	0	0
12613_bclustnum_582_kamer_2_number_2	AAAAGTCACATGTAAACATTGTTCAAAAGATGGCCATGATGAAGACCATTGTTGGAAGCTTCATCCTGAAAGAAGACCCAAA	0	0	0	1.09861	0	0	5.115	5.02059	4.95934	5.30455	5.86007	5.81189	0	0	0	7.53556	7.45095	7.46193	4.93267	5.1165	5.3095	7.60527	7.5654	7.59727	0	0	0	3.46574	3.13549	3.3322
126151_bclustnum_25_kamer_1_number_1	TCCTTAATACCTTTCTTTTTGGGGTAATTATACTCATCGCGAATATCCTTAAGAGGGCGTTCAGCAGCCAGCTTGCGGGAAAACTGCGTAACCGTCTTCTCGTTCTCTAAAAACCATTTTTCGTCCCCTCGGGGC	0	0	0	0	0	0	0	0	0	0	0	0	0	0	0	0	0	0	0	0	0	6.53233	6.38882	6.26625	0	0	0	0	0	0
126151_bclustnum_84_kamer_1_number_1	CGCGAATATCCTTAAGAGGGCGTTCAGCAGCCAGCTTGCGGGAAAACTGCGTAACCGTCTTCTCGTTCTCTAAAAACCATTTTTCGTCCCCTTCGGGGCGGTGGTCTATAGTGTTATTAAATCAAGA	0	0	0	0	0	0	0	0	0	0	0	0	0	0	0	0	0	0	0	0	0	6.6869	6.61696	6.36676	0	0	0	0	0	0
126252_bclustnum_73_kamer_1_number_1	GGTGTGTTCCATATTCTTCATGGCATGCCTGGTCCCAACACGACGAAGAGGAGTTGACCTGGGATAGAGCAGGCTCTCGGGGCAAGTGGTGCTCCATGTAAGGAGAGTGCTTCCAACGCGAGCTGCGGCGTGCTCCCAATGCGAGCT	0	0	0	0	0	0	4.95647	5.15749	5.01366	4.74176	6.03352	5.68944	1.09861	1.09861	0	0	0	0	7.19293	7.02116	7.14541	0	0	0	0	0	0	0	0	0
126282_bclustnum_110_kamer_1_number_1	AAAGACCCCCCAGAGGCTCCTCTGGTGTCTTATTCCCTTGCTTAGAGTACTCAACAAGGTGCTGCAGAT	0	0	0	0	0	0	3.62878	3.44113	3.54898	6.58002	6.57693	6.51504	0	0	0	0	0	0	3.59273	3.27924	3.70267	0	0	0	0	0	0	0	0	0
126286_bclustnum_278_kamer_1_number_1	TTGCAGAATAAGCAAGAAACAACTTCAAGTTCAAAGGAGAAATCAAATTATTGAAGAATCGGAGCTAAACAGAGGAGTAAAGCGGTCTTCGTAGGAAAAGTGTTTTCGTGTGGGCT	0	0	1.09861	0	0	0	1.7346	1.09861	1.60944	0	0	0	0	0	0	0	0	0	1.52606	1.09861	1.60944	0	0	0	6.91523	6.8809	6.91597	0	0	0
126286_bclustnum_59_kamer_1_number_1	CTTGTACTGCACTTTCTCTTAACATTGCCTATGTTCCGACCTATTTGTTCTAAATCATGCGGAG	6.79682	6.93828	6.82492	0	0	0	0	0	0	0	1.09861	0	0	0	0	1.09861	1.46634	0	0	0	0	1.60944	1.09861	1.09861	1.09861	0	0	0	0	0
126298_bclustnum_18_kamer_1_number_1	AACACAGTATGTATGGGGAAAGATTATAGCTGAAAACCCTGAAGACCCACCT	0	0	0	0	0	0	0	0	0	6.22654	6.93495	6.72713	0	0	0	0	0	0	0	0	0	0	0	0	0	0	0	0	0	0
126321_bclustnum_47_kamer_1_number_1	ATTTGGATGAGGAAGATCCTCGCAGGATTGTTCAGGTTGCATTTGGAGCCTACAATGATCTACTATGATAACCAGAGCTGCATCAAGCTCTCGGCAATCCATAT	1.09861	2.83321	2.19722	0	0	0	1.09861	0	1.88707	6.29453	6.84822	6.94928	0	0	0	1.09861	1.09861	1.52606	2.19722	1.79176	1.79176	0	1.09861	1.46634	0	0	0	0	0	1.09861
126323_bclustnum_84_kamer_1_number_1	GATCGCCTGCGGACACCCCCCCACGGAGCTAAGAGGCGAGAGCGTTCCACCTCCTCACCGAGCTAGCCCTTTTTCATGCAACCGTCACTCTCCGAGTGCATCACTCTACCGAG	0	0	0	0	0	0	0	0	0	0	0	0	0	0	0	0	0	0	0	0	0	0	0	0	0	0	0	6.60854	6.55222	6.58865
126378_bclustnum_13_kamer_21_number_3	TCAGGTGCCACATAAGTTTTAGGTGGGCGACAAAGTTTGGTTCACTTGAGAAAGAACACCTTACAGGACCCCAT	0	0	0	0	0	0	5.33823	5.39298	5.38253	2.8824	3.54715	3.17208	3.85015	3.7744	3.51367	5.09199	4.80986	5.10074	6.53773	6.409	6.29816	4.68345	4.85091	4.62917	0	0	0	1.48808	1.42139	1.09861
12638_bclustnum_1880_kamer_1_number_1	CCTTCGAGAGCGCTCTGGAGAGCACCCTTGCGAGCGCATTGGAGATCGTCTTTCAGAGCGTTCTTGAATCGCATCGAGAACGCTCTCCCTGTAGGTGTCTCTGGTTTCGT	0	1.09861	1.09861	0	0	0	0	0	0	0	0	0	0	0	0	0	0	0	0	0	0	0	0	0	6.68611	6.80838	6.65878	0	0	0
12638_bclustnum_1_kamer_1_number_1	CCCACCTTGCGAGCGCACTAGAGAGCATCCTTCGAGAGCGCTCTGGAGAGCACCCTT	0	1.7346	0	0	0	0	0	0	0	0	0	0	0	0	0	0	0	0	0	0	0	0	0	0	7.4063	7.45972	7.43838	0	0	0
12638_bclustnum_357_kamer_1_number_1	GAGCGACTGGAGAGCACCCTTGCGAGCGCACTCTAGAGCGTTCTCGAGGTCGCATTCTAGAACGCTCTCTTTGGAGACGTCTCTGGTTGCGTACTCGAGAGCGCTCTGGAG	1.09861	0	0	0	0	0	0	0	0	0	0	0	0	0	0	0	0	0	0	0	0	0	0	0	6.42546	6.51012	6.33554	0	0	0
126399_bclustnum_25_kamer_1_number_1	TGTTGCGTTGGGGTATGAAGTTGCGCTGGGCGGCTTTATTTCACCGGTATTGCTACTGTTGC	0	0	0	0	0	0	7.25927	7.21008	7.16438	5.2546	5.34233	5.34446	0	0	0	0	0	0	7.58302	7.56291	7.47199	0	0	0	0	0	1.09861	0	0	0
1263_bclustnum_3233_kamer_1_number_1	TTTTGTTGGAAGGTGTGCTATGAAGAAGAATGAACCATGTGCTGCAAGAAGATAATCCTCCTCATGCTTGGAAACCCAAG	0	0	0	0	1.09861	0	1.09861	1.09861	1.90424	6.5045	6.72194	6.6287	0	0	0	0	0	0	1.09861	0	1.09861	0	0	0	0	0	0	0	0	0
126650_bclustnum_15_kamer_7_number_2	TTTGGTCCAACCTTTGGTCAATGCGACACCAGTCCACAACTTTCCATCCCCAAACTGATGGCCA	0	0	1.09861	0	0	0	6.1717	6.19032	6.24222	6.10479	6.67876	6.64942	3.60187	3.45527	3.57422	4.21951	3.56483	3.56483	6.35611	6.04342	5.93666	3.87812	3.95763	3.62878	0	0	0	1.09861	0	1.09861
126654_bclustnum_32_kamer_21_number_2	ATAGTCTTCTTGTTTATGGTTCCAAAGCTTATAACCTTTCACACCATCTTTATAAC	1.09861	1.60944	1.09861	0	0	0	3.48431	3.4012	3.35574	2.00148	1.88707	2.63906	3.20545	3.3673	3.37872	7.24803	7.39572	7.38295	2.8792	3.15274	3.18635	7.49979	7.50071	7.52958	0	0	1.09861	1.52606	1.43508	1.60944
126675_bclustnum_239_kamer_1_number_1	NAGCTNGCATGGACACCCCCAATTTTGGGCGCCGGGTGGAAACCCCAAATTTTG	0	0	0	0	0	1.60944	7.29533	7.29016	7.24208	0	0	0	0	0	0	0	0	0	8.05191	7.64348	7.92797	0	0	0	0	0	0	0	0	0
1266_bclustnum_362_kamer_1_number_1	GGGATTTTGAGGGAATGGAACTAATGGGATGACATGTGAACAGATCATTATTACAAGACTTGACAAAATTGGTGTTCATGACAACAAGGGAGACCACCTTATTAC	0	0	0	0	0	0	0	0	0	0	0	0	0	0	0	0	0	0	0	0	0	0	0	0	6.42811	6.55108	6.3956	0	0	0
12670_bclustnum_106_kamer_1_number_1	CTAGAAGCAGTGATTTTAAAAAACTGGCGGAAGTAACCTTTTCTTATTTCCGGACCCATGCGTAAACTTTAGAAAGTCGTTATGATGTAGATGTGCA	0	0	0	0	0	0	0	0	0	0	0	0	6.7229	6.68141	6.68281	0	0	0	0	0	0	0	0	0	0	0	0	0	0	0
12670_bclustnum_47_kamer_1_number_1	AATGGGCAAGTAAGCTTTTCTTATTTCCGGACCCATGCGCAAACTATAGAAAGTCTTTATGATTTAGAATGTGCATACTTTGTTGATTCTATTTATG	0	0	0	0	0	0	0	0	0	0	0	0	6.95135	6.86751	6.92504	0	0	0	0	0	0	0	0	0	0	0	0	0	0	0
126744_bclustnum_284_kamer_1_number_1	CGGAACGGAAGGAAGAGAAGGACGCGGGCAAGAGGGCGCACCCGGGGGGCGGAACATACCAGTCATGGGAACACTTGATGGACTGGTTGCATTGGAAGATAATGTTTGTAAGCTA	0	0	0	0	0	1.09861	5.45959	5.53864	5.34506	2.15948	1.7346	1.86075	0	0	0	0	0	0	6.90475	6.35957	6.24804	0	0	0	0	0	0	0	0	0
1267_bclustnum_2356_kamer_1_number_1	TGATCGCCTTTCCAAAATTGTCTTTTTGTGCATTATCACATCCATTCACTC	0	0	0	1.60944	0	1.94591	6.92067	6.91175	6.9594	2.70805	1.94591	2.56495	0	0	0	0	0	0	3.31419	2.80336	2.89037	0	0	0	1.09861	0	0	3.77963	3.32504	3.20275
1267_bclustnum_8984_kamer_1_number_1	ATCCAGACAAAATAAACCTTGATTAGTTAAATTTTTAGAAATGTGTGATAGGCTAG	0	0	0	0	0	0	0	0	0	0	0	0	0	0	0	0	0	0	0	0	0	0	0	0	0	0	0	6.73863	6.76596	6.85478
126821_bclustnum_57_kamer_1_number_1	TCTATAATACCAAGCCCGGGGGCCCTGTTTTAGTCTATAAAATGCCTTCTTCAGCTTACAAACATAATTTGGGATGTCTGTCAATGAGAATCCTTCAGGTTGCTCCATACATACTTCTTCCTCTAGATCTCCATTAAGAAACGTGACTT	1.09861	1.09861	0	0	0	0	1.09861	0	1.09861	3.61861	3.91488	3.63099	1.97155	2.1347	1.76766	6.50792	6.19061	6.25685	1.38629	1.09861	0	6.60877	6.6488	6.57945	0	0	0	3.02042	2.89037	3.30811
126864_bclustnum_37_kamer_1_number_1	TACCTTTCAATGCATCACGAGTCCTTTAAGAAGGTGTTGTTATTGACATAA	0	0	0	0	0	0	1.88707	1.43508	1.43508	0	1.09861	1.09861	0	0	0	5.81413	5.8999	5.81754	1.88707	1.09861	1.43508	6.66313	6.57667	6.65249	0	0	0	0	0	0
126874_bclustnum_124_kamer_1_number_1	GAATAATGCAAGATACCAGATAATAGAAATGCAGAACAAAAACGAAATGCTAGAAATGACA	0	0	0	0	0	0	0	0	0	0	0	0	0	0	1.09861	6.33801	6.5662	6.50728	0	0	0	6.25894	6.26657	6.34681	0	0	0	0	0	0
12688_bclustnum_740_kamer_1_number_1	TCATTTTTCGTCCCTAGGTGTCGGGAATGGTAATTTGGTTGAAAGATTAGTTTCATTTCATA	1.60944	2.19722	1.94591	0	1.09861	0	4.28703	4.29955	4.53021	5.96717	7.37432	7.23265	1.09861	0	1.09861	0	1.09861	0	2.27727	2.58669	1.86075	0	1.09861	0	0	1.60944	0	1.09861	1.60944	0
12688_bclustnum_824_kamer_1_number_1	GGTAGCACAATCTATAGCTAGCAGTGCCACACAAATACTTGAAAACTCTTTTTACTAATGACCAATGCTCTTTCCCTGGTTTTGACATATACCTGCTAAAAACTCCCACGGATGTTAATGTATGGTCCAGTACAGACTATCGCATACATAAGGCTACCGACTGCACTTGCATATGTAACACATGACATGTCCTCTTCCT	2.3979	2.19722	2.56495	0	1.60944	0	5.85235	5.78673	5.94363	2.67233	3.26415	3.08865	2.53017	2.46385	2.04769	5.26323	5.10147	5.01518	6.94205	6.86983	6.80933	5.43469	5.3911	5.50126	0	0	0	2.48491	2.19722	1.52606
126891_bclustnum_192_kamer_1_number_1	GCCTTAGCAAGCCATGGTCACATGGTGTCAAATGGTGTCAAGGAGGTCAAA	6.59783	6.5903	6.55429	0	0	0	0	0	0	0	0	0	0	0	0	0	0	0	0	0	0	0	0	0	0	1.09861	0	0	0	0
12692_bclustnum_469_kamer_1_number_1	TTACAAGGGTACAATAATAACAATCAGGGGGTTACACTAACAACAATAAGGGACTATATTAGTAATGTAGGGACCTAACATAATATGCATATGCGCCT	0	0	0	0	0	0	0	1.50408	0	7.67606	8.00737	7.85438	0	0	0	0	0	0	0	0	0	0	0	0	0	0	0	0	0	0
12693_bclustnum_1414_kamer_1_number_1	ACCCACTCAGTCTGAAGTCATGATCTCCATCATAATTGAGACCACAATCTAATGTACCCTTAAGGTACCTCATCACATTTTTGCGCA	0	0	0	0	0	0	0	0	0	0	0	0	0	0	0	6.76273	6.44651	6.46886	0	0	0	6.75256	6.71508	6.69549	0	0	0	0	0	0
127008_bclustnum_14_kamer_10_number_3	AGAAAACAATCGAGTACACATGCACTTCATCAGAAAGCTCATTCATGATCAAGT	0	0	0	0	0	0	7.17488	7.19609	7.24008	5.57215	5.6113	5.43721	0	1.60944	0	6.80351	6.63621	6.58783	7.32739	7.20919	7.19098	6.63095	6.65852	6.74876	0	0	0	0	0	0
127023_bclustnum_8_kamer_1_number_1	TTTCTGAAGGGTGGCTTTGAACCCATGAGAAGAGAAAGGAGGTCCTCCATCTGTAACTAACTCTCTTGGCATTCCAAATCTGATAAAGATGTCTGTGAATAAGAATTTTATAACCGCTTCTTCAGTTGCTCTGGGAGTG	0	0	0	0	0	0	2.83321	2.76212	2.64696	4.17746	4.24563	4.31214	0	0	0	6.64609	6.42736	6.68586	3.01553	2.64696	2.7213	6.8769	6.82913	6.88669	0	0	0	0	0	0
127123_bclustnum_45_kamer_2_number_2	CAAGAAAATACTCAAGAGGAAAGGTAATATAAAGGTAAGGTGCCACTTATTTTCTTTTCTTGTGAAGAAGTAGGTCATATTGCTTC	6.60969	6.55678	6.49753	0	0	0	0	0	0	0	0	0	0	0	0	0	0	0	0	0	0	0	0	0	0	0	0	0	0	0
12712_bclustnum_179_kamer_1_number_1	CCACATCTGCTACTATAAATAGACTGCTCCCTTGAAGGACAGCTATACACAGTCAGCCTTTATCAGAAGCTTCTTACCTTGGTCCTTGACTTGGCTGCAGGAAAGCCACAAAAGACTTGAATCGCGAAAGGATCCACAACCACACGTTCTAGGCCATGTATATCCCAATTATTTCTTTAACTTTATGCCA	0	0	0	6.64736	6.67866	6.66185	0	0	0	0	0	0	0	0	0	0	1.09861	0	0	0	0	0	0	0	0	0	0	0	0	0
127167_bclustnum_22_kamer_1_number_1	GGGGAAATGTTTCCCATAATCTAGTCCTTCTTCTTGTGATCTCACCATTCTCATCTAGCTTGTTCCTAAATACCCACTTGGTACCAATCACATTC	6.70264	6.58893	6.66879	1.09861	1.09861	0	0	0	0	1.09861	0	0	0	0	0	0	0	0	0	0	0	0	0	0	0	0	0	1.09861	1.09861	1.75786
127238_bclustnum_86_kamer_1_number_1	AATCCCACGGCAATGCTCTCGTTAGTTACCTCCCTTGGAGCTTAATTGAGATCGG	0	0	0	0	0	0	1.09861	0	1.09861	6.08095	6.61016	6.608	0	0	0	2.67415	2.81626	2.94444	0	1.09861	0	2.50144	3.00568	3.02042	0	0	1.09861	0	0	1.09861
1272_bclustnum_458_kamer_1_number_1	ATGGATAAAGGATAAAAGCCTAGTGGGGTCTCCCTATATACGCGACGGTACGTGGGAGCTCAGTCCGTGTTAGACCATATCGATCACAGAAGGAGGAATCAC	0	0	0	0	0	1.09861	6.62698	6.66415	6.61607	1.66501	1.94591	2.37158	0	0	0	0	0	0	6.81146	6.67759	6.55735	0	0	0	0	0	0	0	1.09861	1.52606
127303_bclustnum_89_kamer_1_number_1	ACTGTCGGGTATTCCAAATCTTTCAGCCACTTCTGAGCGTTGTCGTTTTTTCTTGTGCAACGGAGACTTTTGATCT	1.09861	0	1.09861	0	0	1.09861	0	0	1.09861	10.945	0	0	0	1.09861	0	0	1.09861	1.44238	0	0	0	1.09861	1.09861	0	0	0	1.09861	1.09861	1.09861	1.50408
127330_bclustnum_45_kamer_6_number_2	GGATGTTCATCATCCACTGTACATCTCACAGGGTATGAAAGGCTTAAAAGAATATACATA	6.82979	6.83518	6.83015	0	0	0	0	0	0	0	0	0	0	0	0	0	0	0	0	0	0	0	0	0	0	0	0	0	0	0
127338_bclustnum_113_kamer_1_number_1	AAGCATGCTCTTCAGAGCGCTCTGAAGTGCGATCTCGAAAACGCTCTCAAGTACGCAACCAAAGACGCCTCAAGAGAGAGCGTTATCCGGTGCGTCTATTACGATCGGAAGTAGGAACATCTAGACATGTATTTTCACAGGG	0	0	1.09861	0	0	0	0	0	0	0	0	0	0	0	0	0	0	0	0	0	1.09861	0	0	0	6.73565	6.79508	6.79533	0	0	0
127375_bclustnum_48_kamer_1_number_1	ACCTAAAGCGGTCATGGAAACAAGAACACGACAACTACGAAATCGAGCAATTTCAGAGTATCTCATCAAATGGAAGCACTTACCCACTGAATAAGATCGGAAGAGCGTCGTGTAGGGAAAGAGGGTAGATCCGGTGGCGCCGTATC	0	0	0	1.09861	0	1.09861	6.04474	6.11393	5.99595	6.54435	6.75833	6.80276	0	0	0	0	0	0	5.82008	6.19554	6.00608	0	0	0	0	0	0	4.3108	4.35028	4.23732
127398_bclustnum_226_kamer_1_number_1	CAGGATGTATCAAGGAGGTGAAATCGCAGCTATCCTCCAAATTTGACATGAAGGATCTCGGTGCT	0	0	0	0	0	0	4.8828	4.7362	4.73912	4.85203	5.72359	5.33594	4.83892	4.73912	4.77912	6.90442	6.78408	6.85822	4.43872	4.32192	5.01064	7.39408	7.4309	7.50732	0	0	0	2.96183	3.16407	2.87168
127413_bclustnum_26_kamer_1_number_1	TACAGCTTGAGCAAAGATCAAGGACAATGGAGATGTTCAAACTTGACAAATCTATTGAGATGCGAATTAGATCTGAGTCCAAAATCGAACATCGGACAGAAGGGAACTCAGACATCAGGACATCA	7.13671	7.02096	7.10274	0	0	0	0	0	0	0	0	0	0	0	0	0	0	0	0	0	0	0	0	0	0	0	0	1.09861	0	0
1274_bclustnum_8294_kamer_1_number_1	CTTCTTATTTTTTGACCGATTGAGGTGCTGAAAGAGCCTAGACAGGGGTTTTGGGATGCTGGGAAGCCATTGGAGCAGTCGGTTTGCTGAGCAAGGGTGCGATTTGTAGAACCAGAGACAACAAAGTTGAAGAGGGAGACTTCAAGGAGGCTATCTTCTT	0	0	0	0	0	0	0	0	0	0	0	0	0	0	0	5.67418	6.59198	5.761	0	0	0	5.44626	5.15081	5.54126	0	0	0	0	2.13163	2.16496
127509_bclustnum_72_kamer_1_number_1	ATTGGTTTTCAACTGGTCATTCTCGGCCCTTTGCTCTTGGATGATTTCTCTCAGCTTCGAGCTAGGAGAGCCCGTATCAACATCAATAACTGTCATATCTGTGTCCCGGCCTC	0	0	0	0	0	0	0	1.09861	0	5.16893	6.51713	6.34707	0	0	0	0	0	0	1.60944	1.90424	1.5506	0	0	0	0	0	0	0	0	0
127589_bclustnum_37_kamer_1_number_1	TGGAGCATGGTATGAAAGACTGCATAACTATCTTATTCAGATTGGTTTTCAAAGAACTAACGATAACAGTAGCATTTATTACACTACATTCACTGGGTGCTTGGGTTCT	6.69703	6.69394	6.64086	0	0	0	0	0	0	0	0	0	0	0	0	1.09861	0	0	0	0	0	0	1.09861	0	0	0	0	0	0	0
127687_bclustnum_75_kamer_1_number_1	AATACATGAAACGTGTTGAGCATACTTTTATCACTTTTTCGGGCTCAACAAGGTTATACGAAAAAGGAACCCCC	0	0	0	0	0	0	2.07944	3.1209	3.41773	4.56643	3.94158	3.62434	1.81529	1.50408	0	5.85179	6.56707	6.27045	2.3979	2.66259	2.26868	5.99752	6.15789	5.98105	0	0	0	0	0	0
12769_bclustnum_128_kamer_49_number_2	CAACAGACAGAGAGTCAGGAGTTCAGGCTACTGATGGGATGAGAGGAGTAACCTTGAGAGATGCCACATCTGTT	0	0	0	0	0	0	5.62608	5.65249	5.52773	3.72052	4.36219	4.46919	0	0	0	0	0	0	6.75444	6.53067	6.45811	0	0	0	0	0	0	0	0	0
127741_bclustnum_127_kamer_1_number_1	TACTTCTAACTTTTATTGATGATTTTTCTAGACACACTTGGTTATACTTCTTAAAACTCAAGAGTGAATTTTTTAACATGTTCTTAGATCGGAAGAGCGTCGTGTAGGG	1.79176	1.94591	1.5506	1.7346	1.94591	1.35812	7.05263	7.03517	7.08386	5.9496	6.49543	6.62969	1.5506	1.09861	1.09861	4.23411	3.40489	3.98898	7.2163	7.32317	7.20638	4.10264	4.09017	4.11451	1.09861	0	1.38629	1.09861	1.88031	1.88707
1277_bclustnum_520_kamer_1_number_1	AGCCTTAGCTGCCCAGCAGAAAGATAAACCCAAGCATCCCAAGAAGCAACATCCTCGCTACAACAACAAACAGCCAAGGGTCC	0	0	0	0	0	0	0	1.09861	0	0	0	0	1.09861	1.50408	2.05412	6.59817	6.53015	6.57821	0	0	0	6.61036	6.60564	6.64931	0	0	0	0	0	0
12780_bclustnum_965_kamer_1_number_1	TCTTCGCCCTGCTAACTAGTAGCAGCAGTTTCAATGGAAATAAATAACAATAAACTAATTAAACAAGACTATTCATGGATCTAAGCAAATATATTAAG	0	0	0	0	0	0	0	0	0	0	0	0	7.09902	7.09681	7.1163	0	0	0	0	0	0	0	0	0	0	0	0	0	0	0
127832_bclustnum_42_kamer_1_number_1	TCGGCACTTCATCTTCGTCATCATATGATCATGGTCACGATCATCACTGTCTTTAGTCATCTT	0	0	0	0	0	0	0	0	0	0	0	0	6.68545	6.70482	6.65071	0	0	0	0	0	0	0	0	0	0	1.09861	0	0	0	0
127840_bclustnum_30_kamer_1_number_1	GCTACCGAGTGGGGATGGATGTCGACGACCCTACAAATGACCCAAGGCCACTCTTCAGGCACACCGGAACAAGCAACTCAGTTACAACCC	0	0	0	0	0	0	0	0	0	6.98749	8.17767	8.19457	0	0	0	0	0	0	0	1.09861	0	0	0	0	0	0	0	0	0	0
12784_bclustnum_1244_kamer_1_number_1	GTTCTTGTTTCTGTGACTGCTTCCGGTTCCAATATAATTTTCCTTCTCGTCAAGTTCTGGCAATATTGTTTGAACTGGGAGTTGTCGC	0	0	0	1.09861	1.09861	1.09861	9.0146	9.01557	9.03041	7.68788	7.88024	7.91279	0	0	0	2.46385	2.16905	1.94591	8.9866	9.01116	8.98516	2.72458	2.32728	2.77259	0	0	0	2.32728	2.37491	1.94591
127859_bclustnum_259_kamer_1_number_1	AGAAAATTATAAAGAAAAATAACAAGAAATGGAAAACATATTAAGAAATTCGAAATGTTTGGACGAAATAGCAAAATGATACGCAATAGTCAAGAATAAAGTGTTGGAGATTTGGAAATAAATTCTCAGGCTCAAAACCAACCAATACTTGAAAATA	0	0	1.09861	0	0	1.09861	1.09861	1.09861	1.83258	0	0	0	0	0	0	0	0	0	1.29928	0	0	0	0	0	8.18189	8.14451	8.18384	0	0	0
12786_bclustnum_3615_kamer_1_number_1	GATCACACTCTTCCCTACACGACGCTCTTCCGATCTCCTTACTACGCTAGGGTACTAGCTCTGTGTGAGCACCATTAACCACACGGTACCC	1.09861	0	0	0	0	1.09861	0	0	0	10.2536	0	0	0	1.60944	0	0	0	0	0	0	0	0	1.94591	0	0	1.75786	0	0	0	0
127877_bclustnum_82_kamer_1_number_1	CTGGCGTCCTTTGTCACATGCATGTAGACATGTGAGCCAAAAATCCTCAAATGGGAAATGTCAGGCCTCTTGCCAGAAAACACCTCCTCCGGTTACTCA	0	0	0	0	0	0	3.64632	3.85956	3.61691	5.83578	6.55883	6.59259	0	0	0	0	0	0	5.37476	5.15842	5.3143	0	0	0	0	0	0	1.09861	0	0
12788_bclustnum_360_kamer_1_number_1	TACTTCATATAATATCTTCACTTTCATGGACTGTTTTACTTCACTATTGTAGGGTTTTGGGTACTTTAATTTGTATTTGGAACAATGGACTCAGATGGA	0	0	0	0	0	0	0	0	0	6.12663	7.57061	7.53113	0	0	0	0	0	0	0	0	0	0	0	0	0	0	0	0	0	0
128080_bclustnum_27_kamer_1_number_1	GGATGATTGTGGATAAATACCATGGATGAAGAGTTGGATCAGATAGAGAAGAATG	1.09861	1.79176	1.09861	0	0	0	5.60947	5.78909	5.775	0	1.09861	0	0	1.09861	0	2.8824	2.79902	2.94444	6.87272	6.82577	6.83779	3.09752	3.19575	3.32709	0	0	0	1.89712	1.09861	0
128113_bclustnum_45_kamer_1_number_1	TAGTTCATTCAAATGTTCACCAAACGCTGATGAAAAGAGACAGAAAATACAGCATTTAGGACCATATGAT	0	0	0	0	0	0	6.53015	6.4951	6.33249	0	0	0	0	0	0	0	0	0	6.00608	6.15391	6.24546	0	0	0	0	0	0	0	1.09861	0
1281_bclustnum_294_kamer_1_number_1	TTTCCGGTTGAGTAAAGATCTTTCTTTTTCTGAAATTGTTTTCTTTGTCAAGAATCTCGCTCTTTTGATCTGTTTCACT	0	0	0	4.01251	4.13859	4.14313	0	0	0	0	0	1.09861	0	0	1.09861	6.83442	6.86708	6.80335	1.69459	1.46634	0	6.80857	6.74993	6.80208	0	0	0	0	0	0
12820_bclustnum_1310_kamer_33_number_2	AAGATGTTGAAAAACATAGTGCAGGAAATGGTTGATGCAGGGGATATAACTCCGATAACCTAATGCCACC	0	0	0	6.65691	6.63125	6.67834	1.09861	0	0	0	0	0	0	0	0	0	0	0	0	0	0	0	0	0	0	0	0	0	0	0
12821_bclustnum_1224_kamer_10_number_2	CAGAATAGGCATTTTAGTCTCACTGGAGGTCCATCGGAGTGTAAGGTAGTAAAGAAACACACTTTACCTAA	0	0	0	0	1.94591	0	8.73512	8.53248	9.00319	7.32581	7.53956	7.51371	2.13163	1.71765	1.90424	0	1.09861	0	7.87112	7.71343	7.80609	1.09861	0	0	0	0	0	0	0	0
12821_bclustnum_163_kamer_1_number_1	TAAAACAAAAAAACAGATCAGATCTTTTGCGTATCCCATGCAACCTGCATGCAGCCAATAACTGAATAGGGAGAAGGCATGCA	6.58029	6.50391	6.39275	0	0	0	0	0	0	0	1.09861	0	0	0	0	0	0	0	0	0	0	0	0	0	0	0	0	0	0	0
12823_bclustnum_3213_kamer_3_number_2	GTCGAATATGATGTTTGTACGATGGTTATCATGATCGTGATGTATAGCATCGGAAGATCGTCGTGTAGAGAAAAGAGCAGTA	0	0	0	0	0	0	0	0	0	5.64809	6.55867	6.7618	0	0	0	0	0	0	0	0	0	0	0	0	0	0	0	0	0	0
12835_bclustnum_282_kamer_1_number_1	CCCAAATGAGCCAGCCCATAAATGTTCGTGCTCCGGGTCAAAGAGAGGGCATCCATCGCTTAATTAGTACTGGCGCAAGCTGAATTTGCATATAATAATTCTATGAATAGAAGTAGAGGGAAGACACCATTTGAGATTGTTACCGGAATGCATCCTAGAGGA	6.7966	6.94196	6.86024	0	0	0	1.09861	0	0	0	0	0	0	0	0	0	0	0	1.09861	0	1.09861	1.09861	0	0	0	0	0	0	0	0
128376_bclustnum_48_kamer_1_number_1	GTCCCACAAATTTTGATAGGTGAAGACTAAGCAAAAATTTGTTGAGAAAGCAAAGCATCTTAAGGAACCCGATCCATG	0	0	0	0	0	0	4.30856	3.94297	4.02535	0	0	0	0	0	0	2.94444	3.13549	3.11352	6.49577	6.68808	6.43097	2.19722	2.35138	1.94591	0	0	0	0	0	0
128427_bclustnum_11_kamer_1_number_1	CAACATCATCACGCAGAGCCCCCCCCCGGCACGGCGCCGACCCAGTCACCGCTGAATACCGATGGCTCTTGGTTCCTCCTTGAGGATTTCACGAATCTATCCTATGAACCCTGGTCGTCGATTCTCCTCCTGCGCCTAAGGGTTAAACCCCTCGGCACTTCTCCCAGATCTGACGGTCAGCGGGATTTCT	0	0	0	3.82137	6.23245	6.20658	0	0	0	0	0	0	0	0	0	2.66921	1.64516	1.09861	0	0	0	2.02438	1.67964	1.42139	4.86497	7.08657	4.80129	0	0	0
128467_bclustnum_240_kamer_1_number_1	GATATTCAGTAAGACTAAGGAAGAACATCTTGAGCATATTAGACAAGTATTGCAGAGGTTGAAAGAGGAGAAGTTGATGATTAATCTGCAGACACGTAGTCTGATATG	7.47579	7.56648	7.55608	1.09861	1.09861	1.09861	0	0	0	0	0	0	0	0	0	0	0	0	0	0	0	1.09861	0	0	0	0	0	0	1.09861	1.09861
12846_bclustnum_195_kamer_3_number_3	TGCAATTTTTTGCCAACTTAACACTGATAAAGTTATGCTTGCAACTAGGATTTATAGAAACAATGA	0	0	0	0	0	0	6.37275	6.52698	6.40853	1.09861	1.7346	0	1.94591	1.60944	2.0149	0	1.09861	0	6.73142	6.84304	6.95113	1.09861	1.09861	0	0	0	0	0	0	0
128473_bclustnum_16_kamer_1_number_1	AGAGGTTTCATGATTTTTAAAAAAAACGAGTTTTTAGAAAATGTATTTTATTTAATAAGTGGAATCAACAAAGTATGCACATGCTACGTCATAACGAATTCCTATCGTT	0	0	1.09861	0	0	1.09861	0	0	0	0	0	0	7.20845	7.18326	7.15602	0	0	0	0	0	0	0	0	0	0	0	0	0	0	0
128473_bclustnum_31_kamer_1_number_1	ACATGATTTCTTAAAAAATACGAGTTTCTGGAAAATGCGATTTATTTTATAAATGGAATAAAAAAAGTATGCACATGCTACGTATAACGCTTTCTAAAGTTTGCGCATTCGTCCGGAAATAAGAAAAGCTTACTTCCACTGTTTTTT	0	0	0	0	0	0	0	0	0	0	0	0	6.42139	6.46303	6.50983	0	0	0	0	0	0	0	0	0	1.09861	0	0	0	0	0
128473_bclustnum_35_kamer_1_number_1	ATCTACAAAGTATGCATATGCTACGTCATAACGACTTTATATAGTTTGCGCATGCATTTGGAAATAAGAAAAGCTTACTTCCCCGTTTTTAAAATCACAGC	0	0	0	0	0	0	0	0	0	0	0	0	7.2117	7.23114	7.19188	0	0	0	0	0	0	0	0	0	0	0	0	0	0	0
128473_bclustnum_9_kamer_1_number_1	ATGATTCTTAAAAAACACGAGCTTTTAGAAAATGTGATTTATATCATAAATGGAATCAACAAACTAAGCACATGCTACGTCATAACGAATTTCTATAGTTTGCGCATGCGTCTGGAAATAAGAAAAGCTTACTTCCACCGTTTT	0	0	0	0	0	0	0	0	0	0	0	0	7.08062	7.02757	6.91898	0	0	0	0	0	0	0	0	0	0	0	0	0	1.09861	0
12849_bclustnum_2313_kamer_1_number_1	TATGCAGAGCCAAAAGATATTGTGCGTTGGCTACTTCTGGCTGTCCTTATTTAAAGATCGTATTATTGCGGTCCGGAAATTCCACAACTGTCAAGTGTTTGATCGCAAGATGCGC	0	0	0	1.09861	1.09861	1.09861	6.87457	6.94619	6.78538	1.91959	1.09861	1.981	0	0	0	0	0	0	4.13735	3.92467	4.22617	0	0	0	0	0	0	0	0	0
12849_bclustnum_284_kamer_1_number_1	AATGACTTCACTCTAGAGTGTGTGGCGGTCATATGTCTGGGTATGCCACAGCCCAAAATATATTGCGCGTTGGCTACTTCTGGTCATCTATGTTTAAATATTGTATTATTGCGGTCCAAAAATGCCAC	0	0	0	0	0	0	6.29311	6.14275	6.27977	5.13482	5.1985	5.24878	0	0	0	4.13517	3.89182	3.83945	6.90908	6.7972	6.80922	3.07578	3.63038	3.50255	0	0	0	1.52606	1.09861	1.09861
12849_bclustnum_3251_kamer_1_number_1	GTGAAAAATAAAGTACCTCTGTCATCCCATTTTTCTCCCTGTGGGAGGAATCCGATTTGGGGGTCCTGGGAGGTCGTTTTTGCCATTTAAATGCATATATACCTGTGGACGACACATTGCCCGATCACCTAGAAAAGCTCCTACAGCCTGCGGCAACACGT	0	0	0	0	0	0	6.51885	6.17309	6.43133	0	0	0	3.30636	2.94444	3.69718	0	0	0	2.70805	2.50144	2.94444	0	0	0	0	0	0	0	0	0
1284_bclustnum_1238_kamer_1_number_1	GTAGTGATTTTCCGAAGCCCATTTATGAATATTTACACACTGTTTTTTACGTAACAACTTAGAATTTAATGAGTCATTAATTTTGAATTTTG	0	0	0	0	0	0	0	0	0	0	0	0	0	0	0	0	0	0	0	0	0	0	0	0	0	0	0	7.74573	7.80525	7.80107
1284_bclustnum_2131_kamer_1_number_1	TTTTTTTCACAACCTGCACTTTTTGAACCGAAATTGAAAAATAAAATGTTTAGGAATGTGGAAAATAGTAAAAAATACCATTTCCAACTAAAATCACACAAAAAGACCCAAT	0	0	0	0	0	0	0	0	0	0	0	0	1.60944	1.48808	1.31568	0	0	0	0	0	0	0	0	0	0	0	0	6.85483	6.87851	6.88653
1284_bclustnum_4403_kamer_1_number_1	TTTTCATGGAAGGAAAAGAAATTGAGTTAAGAGGTATCACAGAGAAAACCCGGTAAGGTGATA	0	0	0	0	0	0	0	0	1.09861	0	0	0	1.60944	1.60944	0	7.49628	7.5989	7.6462	1.09861	0	0	7.96543	7.9332	7.92925	0	0	0	0	0	0
128525_bclustnum_150_kamer_1_number_1	ATCTGTATGATTGAATTCTCTGTTGCTTCTTATTATCTTATAATTTTGGCATTATAAAGTGTATGGTACCTAACTGTACAAGGATTAGCAAACTAATCCTGAAATTGGGAGAGTCTA	0	0	0	0	0	0	6.55607	6.51693	6.56456	0	0	0	0	0	0	0	0	0	7.31655	7.01076	6.97401	0	0	0	3.81159	3.55535	3.82622	0	0	0
12855_bclustnum_321_kamer_1_number_1	GTGCGCGGGGTGCGGGGCTGCCCGATCCCTCCTGTTCGGATATGTGTCCCTGTATTGTCTAGCGACCCTTTGATTGCATTTGTCTCCTTCCTTTGCCTTCGCATCGTAGTTTGCAGCAGAGGTGCA	0	0	0	0	0	0	6.79775	6.6563	6.69909	0	0	0	0	0	0	0	0	0	6.72783	6.75499	6.50703	0	0	0	0	0	0	0	0	0
12871_bclustnum_150_kamer_2_number_2	TGAGAGCGTACTGGAGGTCTCACTTGAGAGCTCACTCAAGCATGTTTGCGAGAATTCATCTGCCTCTATACCAGCTTATTTTTGTAAAGGA	2.36085	3.00568	3.08191	0	1.09861	0	0	0	0	0	0	0	0	0	0	0	0	0	0	0	0	0	0	0	9.35525	9.46408	9.35689	0	1.09861	0
12875_bclustnum_16_kamer_1_number_1	TTAATTAGACTTAATTAATAGAAAATTCATCAAAGACATCATAAAACAACATACGCACAAAAGACTCACGGGTTTTCAAAAAGGTAGACAGTCTATTACGAGTCCTCCTTGCAGGACAAGTATTATAGGCTTTGGTTGGGATTGGACCGATCATA	7.00288	6.97595	7.04963	0	0	0	0	0	0	0	0	0	0	0	0	0	0	0	0	0	0	0	0	0	0	0	0	0	0	0
128795_bclustnum_315_kamer_1_number_1	TCCAGTTTCAAGTGTCGAGGGATATCAAGTGCCGAGTGATACAGAGTCTATCAAG	7.56372	7.57343	7.6006	0	0	0	0	0	0	0	0	0	0	0	0	0	0	0	0	0	0	0	0	0	0	0	0	0	0	0
12886_bclustnum_7_kamer_6_number_2	TGCAGCAGATACAACCATTCGATGGTTTAGTACAAGAAGTCGATGGAATTGAACATC	0	0	0	0	0	0	6.57554	6.50529	6.53136	0	0	0	0	0	0	0	0	0	0	1.09861	0	0	0	0	0	0	0	0	0	0
128878_bclustnum_259_kamer_1_number_1	ACATGTAACCTTCTACAAGCTGTGATTTTAAAAAATGGTGGAAGTAAGCTTTTCTTATTTCCGGATGCATGCGCCAACTATAGAAAGTCGTTATGACATAGAATATGCATACTTTGTTGATTCTATTTATGAAATAAAAAACATTTTCTAAA	0	0	0	0	0	0	0	0	0	0	0	0	7.29204	7.29738	7.30816	0	0	0	0	0	0	0	0	0	0	0	0	0	0	0
12887_bclustnum_346_kamer_3_number_2	GCGCGCTCGTCCTCGACCACCGCACCGGCAAACCGACAGGAGGTACTCCACC	0	0	0	0	0	0	0	0	0	6.00092	7.51262	7.51545	0	0	0	0	0	0	1.09861	0	0	0	0	0	0	0	0	0	0	0
128895_bclustnum_360_kamer_1_number_1	ATGTACCAATTACCCAAACGGGGCCCACAATTGATCTATCACTAGGATCATGATAGGTAGGTAT	0	0	0	0	0	1.09861	6.66058	6.38688	6.37161	3.21888	3.13549	3.21888	0	0	0	1.09861	1.09861	1.60944	5.98394	6.12468	5.8522	1.20397	1.20397	0	0	0	0	0	0	0
12891_bclustnum_2625_kamer_1_number_1	TGGGGTTGACTGGCTACTACCGCAAGTTTGTCAAGGATTATGGGAAGATTGCAGCTCCATTAAATGCTCTTTGNNN	1.84583	1.79176	0	0	0	0	0	0	0	0	0	0	7.27942	7.25307	7.33106	0	0	0	0	0	0	0	0	0	0	0	0	0	0	0
128932_bclustnum_23_kamer_1_number_1	GGCTTCGCAAAAGCGCGTGTCTATGGAAAAGTACCTTTGGTCCATGGCAGTTAATCCTTGGAAGTTGTGCCTATGGTTTCGGACCATTGTGTCTCGACGGACGT	0	0	0	0	0	1.09861	6.96697	7.01157	6.91533	0	0	0	0	0	0	0	0	0	6.06285	5.80212	5.88332	0	0	0	0	0	0	0	0	0
128946_bclustnum_24_kamer_1_number_1	TAATACCTATGTGCTCATGGTGACTGCATATTTCATTGGAGTTGTAAATCCTCACTCAAGCGTAGGTAATACCAAGGAGAGAATGAACCTTCAGATCACTTTATGTCTAGAACATATCATGACCGTTAGATTGTAAGTACAAAATACATAGTAAAGAAACACACTAGACCAAGTTAT	0	0	0	1.82455	1.29928	1.09861	6.37218	6.29824	6.52543	3.85015	4.10814	4.3281	2.3979	2.84781	2.44235	1.77307	1.79176	2.59525	6.70896	6.76537	6.71226	2.06546	2.63109	2.07944	0	0	0	0	0	0
12897_bclustnum_92_kamer_1_number_1	GATTGTACAGTGTCCAGTTAGTCCTGATTCTAAGGACTACGAGAGCAGCAGTGATGAAGCGCGGGATGATAATTTTCAAAAGATTGGAGTATCACAATGTCCTCTTAGTCC	0	0	0	0	0	1.09861	7.54323	7.55994	7.53724	1.09861	0	0	1.09861	1.94591	1.09861	0	0	0	6.6129	6.4325	6.48685	0	0	0	0	0	0	0	0	0
12907_bclustnum_394_kamer_1_number_1	CCTTGCATTCATAAAAAAAATTTCCCAGGCCCAGTATGTATGTGGGATTTCACTGGGATTCATTATCATTTTTTTACCTAGCTCATGTACTCAGATATTATTGTATAAGTATTAGTTGCTATCCCAGG	0	0	0	0	0	0	2.83321	2.83321	3.13549	5.73765	6.36441	6.6117	0	0	0	0	0	0	3.55535	3.13549	3.55535	0	0	0	0	0	0	0	0	0
1290_bclustnum_3409_kamer_1_number_1	TTTAGGGCACAAGCCCATAGTGGGAGACGACAAAGTTTTGGAAGCCGAATACCCAACAATGGCGGAAATGTATC	0	0	0	0	0	0	7.07242	7.12448	7.15657	0	0	0	0	0	0	1.09861	0	1.09861	0	0	0	0	1.09861	1.09861	0	0	0	0	0	0
1290_bclustnum_507_kamer_1_number_1	ATAGGGCAATCATTGTTTCCAGGCTTGCAGCCTATAACCAGTACTTCCCGGAGGTCACCATAGTGAGCATCACGCATTCCAACTAGTGTTACGACTACCTCTCATGGAAATGGCC	0	0	0	0	0	0	7.65444	7.6702	7.63434	5.50274	5.95555	5.67519	0	0	0	0	0	0	7.95314	7.91972	7.90212	0	0	0	0	0	0	0	0	0
129168_bclustnum_32_kamer_1_number_1	TGAAGGAGTAGCAAAGGATAGAAATTGTATGTAATAGGAGCATCAATGATGATGTATACGCTATATTAGTATGTTAGAAACACTAAATTAAAACAATCAAAAGCATTTGCATACTAATTTAACATAACTTCATGAGAGACAAA	6.94623	6.67743	7.01661	0	0	0	0	0	0	1.38629	1.20397	1.09861	0	0	0	0	0	0	0	0	0	0	0	0	0	0	0	0	0	0
129184_bclustnum_83_kamer_1_number_1	GATAAGACTGATTCAAATCCTCAAATGCTTGCTATTGTGATTTGGCCCAAACAAACGTGGCCTTAGATCCACCTTTGGTCACTTGGCTGAGGGACCAAGTGATATTAGAGAAACCCAACACAAACCTGTGATAAAAA	0	0	0	0	0	0	0	0	1.42139	1.29928	2.00148	1.8718	0	1.09861	1.09861	1.09861	1.54045	1.50408	1.86075	1.09861	1.46634	1.60944	1.09861	1.5506	0	0	0	6.64609	6.52942	6.51426
129209_bclustnum_49_kamer_1_number_1	AGGTTAATGCCGTCCAGTCCACCACGTCGGATAAATCCTCGAAAGGGAAAGAGTGTAGATCTCGGTGGTCGCCGCATCATTAAAAAAAAAACACGATCTGAACAGCCCAGATTAAATTTCGAACCCCCCCGTCCGTTCTACA	0	0	0	0	0	0	0	1.88707	1.60944	7.18496	0	0	0	0	0	0	0	0	2.10413	2.90142	2.10413	0	0	0	0	0	0	0	0	0
129268_bclustnum_6_kamer_1_number_1	ATTTTCGTGTGAAAGGTGGGTTGGCAACTGAGTTGCTTGTTCGGGTGTGCCTGAAGAGTGGCCTTGGGTCATTTGTAGGGTCGTCGACATTATCTTCC	0	0	0	0	0	0	1.60944	1.09861	0	3.39749	4.04305	4.05853	0	0	0	0	0	0	6.662	6.34153	6.64104	0	0	0	0	0	0	0	0	0
129268_bclustnum_7_kamer_1_number_1	TGCCTGAGAGTGGCCTTGGGTCATTTGTAGGGTCGTCGACATTCATCTTCTCTCCATCCCCACTAGATCGGAAGAGCGTCGTGTAGGG	1.60944	0	0	0	1.09861	0	5.93829	5.81114	5.83919	5.7589	6.44004	6.28493	0	0	0	0	0	0	6.81097	6.56878	6.6695	0	0	0	0	0	0	0	0	0
12929_bclustnum_4245_kamer_1_number_1	AAAGAGAATTATCGCAGGCTCACACTAAATGCTGGATAAATCCATGGACCAAAAATACACTAATGGTGTAATGTCACACCCCCTTATCTTATAAGATATATGATATTGATGGAAAACTAATTGGAAAAGGTGACCAAACTAGAGGTAATCTATTCTACCTTGATATGGATGATGTGTAAT	6.5932	6.61755	6.26973	0	0	0	0	0	0	0	1.38629	0	0	0	0	0	0	0	0	0	0	0	0	0	0	0	0	0	0	0
129307_bclustnum_31_kamer_1_number_1	GAACAGAAAGGCTTGCCATTGCAACAATATACTTGATATCTCCAGATGAAAAGGAATACATAGGCGGCTATACGAGAGAAAAT	0	0	0	0	0	0	2.83321	2.74084	2.8184	6.47372	6.46692	6.52613	0	0	0	0	1.09861	1.83258	2.83321	2.84781	2.54771	2.19722	2.76362	1.90954	0	0	0	0	0	0
129326_bclustnum_48_kamer_1_number_1	GGATTATGATGCTTTACGGACTATATTTTCTGCTCAATTCACATCCAGAGT	0	0	0	0	0	0	4.77912	4.9102	4.97826	5.71006	6.0384	6.11491	2.92929	2.68882	3.29584	2.97041	2.62104	1.46634	4.77726	4.89368	4.65396	3.19575	3.12299	3.13549	0	1.09861	0	6.65487	6.68586	6.68085
129412_bclustnum_93_kamer_1_number_1	GTTTGGGAAAGTTGATACAAGAAATGTTTCCAATGGTAAAAGATAGTAGAGGAAACTCATGATGAGAACAAAA	0	0	0	0	0	0	8.09031	8.08099	8.08249	7.05999	7.27784	7.30105	0	0	0	0	0	0	7.88978	7.9955	7.85748	0	0	0	0	0	0	1.09861	0	0
129478_bclustnum_44_kamer_1_number_1	GCTACGGGACATAAATCCAATGGCTAGGCTAGACCTTCTCAAATCCATGACCTACTTGTGTGTTGGCTCTCTAGGGTTTGAAGGTTAAGCAAATAACAACAAGATAACAA	0	0	0	0	0	1.60944	0	0	0	0	0	0	0	0	0	6.41229	6.79331	6.65948	0	0	0	6.7571	6.49611	6.51075	0	0	0	0	0	0
129575_bclustnum_551_kamer_1_number_1	GTTTCACTCCTGACTGACTGTTTCACCTCCGATTGACCTCCCGTTCGATTAGGTGCCTTGTTCTGACTCCAGTTAGCCTCCCATGCGCCCCCACTGAGCGCCAGA	0	0	0	0	0	0	0	0	0	0	0	0	6.55222	6.47296	6.48768	0	0	0	0	0	0	0	0	0	0	0	0	0	0	0
12958_bclustnum_268_kamer_1_number_1	TTGTGACATTGTGTATATGGTAAACAAAATCAGGTAATATTTCCATTAGATCTTGATTTCTGTGAAAATTGTGTGTATGGTA	2.02438	1.71765	1.38629	1.09861	1.09861	0	6.39726	6.48035	6.40457	2.05412	1.09861	1.09861	1.60944	1.09861	1.43508	1.09861	0	1.52606	7.22853	6.83932	6.84634	1.42139	1.60944	1.09861	0	1.09861	0	1.94591	2.4681	2.15176
129613_bclustnum_6_kamer_1_number_1	AACCATGCAGAGCATTAGCCTTTGGAAAGGTTTGGATTTGGCTTTTGACAAAGCGCATTCTAAGCTCAC	0	0	0	0	0	0	6.58801	6.56323	6.58954	0	0	0	0	0	0	0	0	0	5.21795	5.42983	5.27641	0	0	0	0	0	0	0	0	0
12965_bclustnum_214_kamer_1_number_1	AAATCTAATCAATTGTTTATTCTCCCTACTCAACTGTTCATGAACATTCATTTTTCTCTTAAACAATTAAAGTAGAAGGAACAATATGACCTATACAAAGATATAAGG	6.76273	6.6995	6.72359	0	0	0	0	0	0	0	0	0	0	0	0	0	0	0	0	0	0	0	1.09861	0	0	0	0	0	0	0
129712_bclustnum_137_kamer_1_number_1	AATGACAAAGGGGGAGATTGTTGGCATTATTGATTATGTGTTTTCATTGATGGTAGCATGAGTCCAACATGTACAGTAATCGGAATATATGTGTATA	5.65948	5.62834	5.63978	3.78872	3.47197	3.33932	7.40469	7.46489	7.44561	4.02892	4.34381	4.30856	2.68558	2.43361	2.99573	3.90197	3.82319	3.86598	7.78752	7.72724	7.75961	4.54063	4.54063	4.39136	0	0	0	4.63473	4.35414	4.89035
12973_bclustnum_2284_kamer_1_number_1	CTTCCTCGCTATGGATACTGTGTAATGAAATAACTTGCACAATAGAAGGAATAATAAGAAATATTATATAAATGCTTGATAATAGCTGAGATTTATAGGCCAC	6.78649	6.76296	6.75499	0	0	0	0	0	0	0	0	0	0	0	1.09861	0	0	0	0	0	0	0	0	0	0	0	0	0	0	0
12975_bclustnum_767_kamer_3_number_3	CTCAATTGGCTCATAGCTCATCCTATCATCCTCAATCTGATGGACAAACTGAGATAGTGAACAAATGTCTAGAAGGATACCTTCGTGCNNNN	1.88707	1.60944	1.76766	0	1.66501	0	4.483	4.54595	4.59764	3.43399	3.09104	3.26767	2.70805	2.50553	3.03255	6.98657	6.94962	7.02041	4.17053	4.27319	3.95604	7.83142	7.79729	7.81147	1.09861	0	1.09861	5.21085	5.20812	5.24042
129797_bclustnum_48_kamer_1_number_1	TGGACAATTCATGATGCTCCCAAGTTAACACATTTTTGTGGTATGTAACTTTATTTTAAAGAAAAATGTAATAATTTTTTTATTATTTAAAAAATGGAGTAATTATTCTAA	1.09861	1.09861	1.09861	0	1.09861	0	1.09861	1.09861	0	1.60944	1.60944	1.94591	1.46634	2.06546	2.31363	2.03688	2.85647	2.5177	0	0	0	2.09323	1.81529	1.94591	1.09861	0	1.09861	6.1525	6.68877	6.64726
129810_bclustnum_37_kamer_2_number_2	TCTACAGCTCACTGGCTGATCTAGGGCCAAAATAATGACTGAACACTCGGGTGGGGTATGTTCCTTGAGAGACAATGATGAAGGTGTCTATAAATCTTGGTCCGCCAGCATTG	1.09861	0	0	0	1.09861	0	6.73986	6.74432	6.75913	5.65774	5.53339	5.82674	0	0	0	0	0	0	6.77372	6.92198	6.83793	0	0	0	0	0	0	0	0	0
12982_bclustnum_590_kamer_1_number_1	TTCAAACACATTAAGCACATTCAAATTTCCACATTTCTCATGATCACCAT	0	0	0	0	0	0	0	0	0	0	0	0	6.49798	6.57284	6.46303	0	0	0	0	0	0	0	0	0	0	0	0	0	0	0
129861_bclustnum_65_kamer_1_number_1	TCAGTCTATGTGAGTAATCATTCAGTTAGTCATTATTAATGTCACATGTAAGTAATC	0	0	0	0	0	0	0	0	0	0	0	0	0	0	0	0	0	0	0	0	0	0	0	0	0	0	0	6.72167	6.57953	6.72263
129864_bclustnum_151_kamer_1_number_1	AAAACCATAGTTCCTCATTAACTTACGAAAAAGTCAATTTAGGAACTAGTGAAAA	1.09861	0	0	0	0	0	0	0	0	0	0	0	0	0	0	5.32496	6.55877	6.37434	0	0	0	6.24106	6.27476	6.22693	0	0	0	0	0	0
129876_bclustnum_37_kamer_1_number_1	GACGCCCGATCCTTTAAAAAAAACTATTACCAGAGAAAGTGTAAAAGTAGGAC	0	0	0	0	0	0	3.16758	3.03082	3.45789	7.48431	7.16074	7.1417	0	0	0	0	0	0	2.86627	3.11034	3.42473	0	0	0	0	0	0	0	0	0
129979_bclustnum_55_kamer_1_number_1	TGTGATTTTGAAAAACGGGGGCAGTAAGCTTTTCTATTTCGGACGAATGTGCAAACTATATAAAGTCGTTGTGACGTAGAATGTG	0	0	0	0	0	0	0	0	0	0	0	0	6.56174	6.51767	6.62705	0	0	0	0	0	0	0	0	0	0	0	0	0	0	0
129979_bclustnum_91_kamer_1_number_1	AAAACTAGTGTTTTTAAAGAAATCATGTAAGCCTTCTAGAAGCTGTCATTTTAAAAACGGGGCAGTAAGCTTTTCTTATTTCCAAACGCATGCGCAA	0	0	0	0	0	0	0	0	0	0	0	0	6.69607	6.6878	6.70319	0	0	0	0	0	0	0	0	0	0	0	0	0	0	0
129994_bclustnum_96_kamer_1_number_1	CTTCTTCATCATTAGGTGGTTGTGTCACAGTTGGGGTTATGGACTAGTGTGTCTTCTTCTTATACATCATTCTATATCATTGTAAAGTGGACCATTTTCACTGGTACGGAGTCAG	0	0	1.09861	0	0	0	5.20551	5.35358	5.35186	7.42183	7.75724	7.74567	0	0	0	0	0	0	5.41448	5.53339	5.39816	0	0	0	0	0	0	0	0	0
12_bclustnum_0_kamer_1_number_1	AACTTCGGGATGAAAATGCTCACAATGACAAATCTGTCCACGGAGTGCTTAATCCAACTTACCAAGCTGGGTTACGACGCGACGCCGTTCAACCAGATATTGAAGCAGAACGCAAAAAGAGAGAGAGATT	0	0	0	0	0	0	0	0	0	0	0	0	0	0	0	0	0	0	0	0	0	8.05118	8.03889	7.74832	0	0	0	0	0	0
12_bclustnum_290_kamer_1_number_1	AGCTGTCGCTACTTCCCAAGAAGCTGTTCAGAATCAGAATGAGCCGCAACTTCGGGATGAGAATGCTCACAATGACAAATCTGTCCACGGAGTGCTTAATCCAACTTACAAGCT	0	0	0	0	0	0	0	0	0	0	0	0	0	0	0	0	0	0	0	0	0	6.57432	6.4965	6.27476	0	0	0	0	0	0
130053_bclustnum_417_kamer_2_number_2	TGAAGAGTCTGAAGGTGGGTCTGTTGCTGACCATTTAAATGAATTTAATACGGTTACAAGTCAGCTA	1.09861	0	0	0	0	0	1.46634	0	1.09861	1.52606	1.71765	1.46634	3.27445	2.60796	3.04452	1.09861	1.5506	1.84583	0	2.12026	1.5506	1.09861	1.94591	1.89712	0	0	0	6.4414	6.55169	6.55332
13008_bclustnum_4755_kamer_1_number_1	CCATACAATGATGCAAAGGGACTCAACTTCAAAGATGCCTGATACCCATTGTTGTAGGTAACTTTCCAGGTATAAGTAGT	1.09861	1.335	1.70475	0	1.60944	1.60944	0	0	0	11.457	0	0	0	0	1.09861	0	0	0	0	0	0	1.09861	0	1.09861	2.48491	3.02313	3.04452	0	0	1.09861
13014_bclustnum_214_kamer_1_number_1	ATCATGTCTGCAGTATCGTCATCACGTGATCATCAATACAAGTATCCACACTGATACAAG	0	0	0	0	0	0	0	0	0	0	0	0	6.80039	7.02554	7.08548	0	0	0	0	0	0	0	0	0	0	0	0	0	0	0
13014_bclustnum_98_kamer_1_number_1	GTATCCCATCAATATAAGTATCCACACCAATACAAGTATACATTATCAATACA	0	0	0	0	0	0	0	0	0	0	0	0	7.10972	7.10316	7.09589	0	0	0	0	0	0	0	0	0	0	0	0	0	0	0
13016_bclustnum_3311_kamer_1_number_1	AACTTGACAAGCTTAGAAAGAACTTGGTCAGAACTACAACTTTGCAATACAAAATTGTTAACCTAGAGAGCTAGG	0	0	0	6.66483	6.63609	6.69607	0	0	0	0	0	0	0	0	0	0	0	0	0	0	0	0	0	1.09861	0	0	0	0	2.13163	1.09861
130174_bclustnum_932_kamer_1_number_1	CGCGACACTTGGAGCAGTTTATTAATGCAAAGAAAAAGATTACAGAGAGATTTTACAAG	0	0	0	0	0	0	0	0	0	0	0	0	0	0	0	6.44466	6.27162	6.40798	0	0	0	6.80276	6.77079	6.67414	0	0	0	0	0	0
130198_bclustnum_27_kamer_1_number_1	CTTCTTAATGTGTTGCATATAAAACCATCATGACAAGAGAAGAAAGAAAAGGATTGATATTGAAACAAAGAAG	0	0	0	0	0	0	1.09861	1.43508	1.52606	6.05007	6.56908	6.48114	0	0	0	0	0	0	1.60944	1.94591	1.09861	0	0	0	0	0	0	0	0	0
130214_bclustnum_27_kamer_1_number_1	TCTAGGAAAAACATTAAGGGAGCACTAAGTAAAAATTCATGAAATTTAATGA	0	0	0	0	0	0	1.60944	1.38629	2.63906	5.64721	6.59987	6.57856	0	0	0	0	0	0	2.11021	1.83258	1.09861	0	0	0	0	0	0	0	0	0
13024_bclustnum_238_kamer_1_number_1	AAAATCTTCCCAATTTGCTCCAAGAATGAATAGAAGCTATAATCGGTTGGATGATAGATCTGATTACCGCAGAAATTTCTTTAATGGCCAATGTTTTCT	0	0	0	0	0	0	6.46234	6.52029	6.51702	0	0	0	0	0	0	0	0	0	4.70953	5.07587	4.92484	0	0	0	0	0	0	0	0	0
130281_bclustnum_9_kamer_1_number_1	AAGAACTTCTCCATATCTAAGATCCAATATAACATAGCATTGGTATCCAATTTTCCATCATAGGAACACTT	6.82948	6.7872	6.82048	0	0	1.09861	0	0	0	0	0	0	0	0	0	0	0	0	0	0	0	0	0	0	0	0	0	0	0	0
130334_bclustnum_36_kamer_1_number_1	GAAGAACTAGGGTTACATGGTAGGAAGCGACAAAATGGGTCAGAGCTGTTGAGCAAGCCAGATTTCTAAGCATTTCCAAATAAAAATTCATTCAAACATACAAATTTCAATGAATACACAATATATATCAAACA	6.90023	6.77372	6.97961	0	1.88707	1.22378	1.60944	0	0	0	0	0	0	0	0	0	0	0	0	0	0	0	0	0	0	0	0	0	0	0
130349_bclustnum_89_kamer_1_number_1	GTGATGAAGTAGTAATGTGATAGGAGTTGTAGTAAGTCATGAAGGTAAACATGTTGCTTTTTTTAGTGCAAATTTGAATGATGCTAAAAGGAAGTATTTTGTGTATGATCAATAATTTTATGCTAT	6.87334	6.94537	6.94184	0	0	1.7346	0	0	0	1.09861	0	0	0	1.94591	0	0	0	1.7492	0	1.09861	1.60944	1.09861	1.09861	1.90424	0	0	0	0	0	0
130385_bclustnum_253_kamer_1_number_1	GAGGGCGCCCATGTGAACTCGTTCAGGCGGGTCGTTTGAGGGCGGCCGACGTCCTCATTCTGGAAAAGGTCGCGTCGGGCGAATGAGCAAGTATAGATCGGAGAGCA	0	0	0	0	0	0	5.82836	5.57215	5.65529	1.09861	0	0	0	0	0	0	0	0	7.3696	7.2083	7.06219	1.09861	0	0	0	0	0	0	0	0
130404_bclustnum_60_kamer_1_number_1	TAGATTACTCACATAAATACACATCCAACTCTGTTACAACTAGTACAACTGAGTTAATCTACTTCACAACTCACTTAACTGAGCTTAACT	0	0	0	0	0	0	0	0	0	5.57384	6.58984	6.53427	0	0	0	3.48124	3.55535	3.62878	0	0	0	4.75359	4.53689	4.13916	0	0	0	0	0	0
13041_bclustnum_150_kamer_1_number_1	TCCATGTTAACATCATAATTGAGTCTAATGGAGATGTACTAGGCCCCCATAGGTTTATTTTCAGTTTTTGTAATAATTAAAAAATCCCGCAAAAATGGATTTTTTAATTAA	0	0	0	0	0	0	0	0	0	0	0	1.09861	0	0	0	0	0	0	0	0	0	0	0	0	0	0	0	6.73113	6.67674	6.72525
130444_bclustnum_66_kamer_1_number_1	ATTTGCCAACATAAATATTCTCTACAAAATCTGTTTTAGTCGAGATATTTATGGCTATAGTCTCTTCAATGTTGGATAAGTTTCGCTCAGAATCCTCGTAT	1.09861	0	0	1.09861	0	0	6.83389	6.83733	6.77056	0	1.09861	0	0	0	0	0	0	0	2.8792	2.75154	2.97893	0	0	0	0	0	0	0	0	0
13046_bclustnum_1734_kamer_1_number_1	ACCGGTCTTGGGACAATCTCCCATGCAGTGTTCCTGACGATCGAATCATATTCTTCGATCATGGCATCAACTTCTTCATCAGTGTCCTTCTCTTCCAGCATCTGCCCATTGAATGATACGCA	0	0	0	4.32192	4.32634	4.32192	4.44935	4.25053	4.16111	6.13773	6.51851	6.53483	0	0	0	0	0	0	5.86241	5.63224	5.65048	0	0	0	0	0	0	0	1.09861	1.09861
130586_bclustnum_126_kamer_5_number_2	ATTATGGCGACAAGGTACCTACCCTCACTTCTCTAAAGAAGGAAGTGTTGCTACGCCTAGATAGATCGG	0	0	0	0	0	0	0	0	0	5.98033	6.86554	6.80091	0	0	0	0	0	0	0	0	1.09861	0	0	0	0	0	0	0	0	0
13058_bclustnum_712_kamer_25_number_2	GTCCAATTGGGGAACCACGTATATTCTGTGTCTCTTGTGTATTTGTATATCTTTTTTGTATTATTTGC	0	0	0	0	0	0	0	0	0	0	0	0	0	0	0	0	0	0	0	0	0	0	0	0	0	0	0	7.79276	7.77504	7.75906
13059_bclustnum_487_kamer_5_number_3	CTATCTCAATTGGATATCGAATTCTTGCAATAATAGTAGCCATCTGGTGAC	1.09861	0	1.09861	0	0	0	1.09861	1.52606	1.52606	1.09861	0	1.09861	0	0	0	6.23793	6.16584	6.37024	0	1.60944	1.88707	6.77377	6.85076	6.83969	0	0	0	0	0	0
130617_bclustnum_82_kamer_6_number_2	AGATTATAGATTATTCATAAGCCTCTTCCCAAAGAGACTTTTGAGTATTTGTGAGGTATGCTTGGGGTTGTGCCCCTTCCT	6.50166	6.56702	6.49828	0	0	0	0	0	0	0	0	0	0	0	0	0	0	0	0	0	0	0	0	0	0	0	0	0	0	0
130619_bclustnum_17_kamer_1_number_1	TTGCAGGCTTTGCATCTTTTGTTGCGGAATCGATCGAATGTGGGGCGAGACTTCAGATTCAAATCGTGCGAAGGGAGGTGTGTTAAACGATCTTGTTTGTCGGGTCCACTTGAAGAATGGC	0	0	0	0	0	0	0	0	0	0	0	0	0	0	0	0	0	0	0	0	0	0	0	0	0	0	0	7.0076	7.00629	6.93511
130619_bclustnum_25_kamer_1_number_1	GCATGTTGCGCATTTACGGAATTGGAGATTCAAATCGTGCGAAGGGAGGTGTGTTAAACGATCTTGCTTGTCGGGTCCACTCGAAGAATGGCCTAGGG	0	0	0	0	0	0	0	0	0	0	0	0	0	0	0	0	0	0	0	0	0	0	0	0	0	0	0	6.86031	6.78559	6.82907
130619_bclustnum_52_kamer_1_number_1	TGTGGCTCCCTTGCAGGGCTTTGCATCTTCTGTTGCGGAATCGATCGAATGTGCGGGGAGACTTTAGATTCAAATCGTGCGAAGGGAGTGTGTAAACGATCTTGTTTGT	0	0	0	0	0	0	0	0	0	0	0	0	0	0	0	0	0	0	0	0	0	0	0	0	0	0	0	7.10052	7.05047	7.04386
130650_bclustnum_33_kamer_1_number_1	TTCAAAGGATATTTATGGTTTTTACAACTCACCAGTAGGAACTTCCAGTATGCAAGAATA	6.62167	6.62061	6.66364	0	0	0	0	0	0	0	0	0	0	0	0	0	0	0	0	0	0	0	0	0	0	0	0	0	0	0
130651_bclustnum_39_kamer_1_number_1	TAACCTTATGCTTTTGTTACATTTTTGTTTTCGCTAAAGCATTTGTTCCGGTTGAAGTAATCCACCTTTTTACGCTTGTTGCAGATGTCAAATCCATTGGAACC	0	0	0	0	0	0	5.48563	5.64545	5.66712	0	0	0	0	0	0	0	0	0	6.52971	6.40092	6.44413	0	0	0	0	0	0	0	0	0
13065_bclustnum_47_kamer_1_number_1	TCATCAAACACAAACATCAAATATACACATCATGATGATCACCAACATGTAAATTAACATATCTAACATGACTTAACAATATAC	0	0	0	0	0	0	2.67415	1.79176	1.8718	6.26435	6.80711	6.93634	1.94591	0	0	0	0	0	1.79176	1.79176	1.94591	0	0	0	0	0	0	1.60944	1.09861	1.09861
130674_bclustnum_63_kamer_1_number_1	CTTCGATGGAATCAACATGAATCTGCATTGTCTGTTTACAGGCTTATGATTAAGCAG	0	0	0	0	0	0	0	0	0	0	0	0	6.83745	6.89174	6.86473	0	0	0	0	0	0	0	0	0	0	0	0	0	0	0
130704_bclustnum_52_kamer_1_number_1	ACCTATCACTGAAACTGTCATCAAAGCAATCTGACCACTTCAAGACCTCCCTGCTATAAGTGCGCCCTCCTCCAAGCAAGAACAACTCCCACAAATAAATGAGGTCTTATTATAATTAATTGGGAAAGCCTCCAGGCTAACTCAAAGAATTATTTTGATGATATGGTATAAAGGAAGGTTATTTT	6.89151	6.9344	6.7372	0	0	0	0	0	0	0	0	0	0	0	1.09861	3.24259	2.43361	2.74727	0	0	0	2.69463	3.32504	2.77259	1.60944	0	1.09861	0	0	0
13070_bclustnum_135_kamer_1_number_1	CACCCACACTCCACTCAAATCACTCCTCCATCTTCCGCAACTCTTCCTCCACAATCGTCAAAGA	0	0	0	0	1.60944	0	0	0	0	0	0	0	7.62594	7.72065	7.72722	0	0	0	0	0	0	0	0	0	0	0	0	0	0	0
13073_bclustnum_329_kamer_1_number_1	TAACGAGCCTAGCGATAGGGAAAGTCGTTCTCGTCTAAAGACAAGTTTGTCGCTATTTAATAAATTTAACGAGTCTAACGACAAGGATAACTCGATCTTTTCA	0	0	0	1.09861	1.09861	0	7.65188	7.66772	7.57219	0	0	0	0	0	0	0	0	0	2.79728	2.84491	2.63906	0	0	0	0	0	0	0	0	0
13076_bclustnum_119_kamer_1_number_1	GGGAAGGGCTCAAGAAGTACCCAAAGCCCCCCGGAGCTCCCAGAGCTCAATGTCCATATCATATAGGACCCTAGATCCAAGCCACAAGGGTCATTGTATTTACA	0	0	0	0	0	0	5.95621	5.88412	5.95399	3.76782	4.35488	4.34751	0	0	0	0	0	0	6.58755	6.58617	6.55941	0	0	0	0	0	0	0	0	0
13087_bclustnum_517_kamer_23_number_2	TGTGGTTGTTCACGAAGATATCCTTCCAAACATTGTTAATACCCATTTTTCCCATCAAATTAAGGACAATAAGATGCGC	0	1.09861	0	1.09861	1.09861	0	7.34843	7.324	7.39664	6.5475	6.74759	6.75693	2.3979	2.94444	2.87168	0	0	0	6.77022	6.69115	6.84694	0	1.09861	0	1.09861	0	1.09861	0	0	0
130936_bclustnum_59_kamer_1_number_1	ATCCTTCATGTAAAATTTAGAGGGAAAATGAGTTTTCACATCCTGGATAATCTCCTTACCGTTTCCTTCAACACATGTCATCCACATATAAGACCAAATAAATCAAATGATCACTAATTAATTTAAAATACACACAATGATCCTCTTTGC	0	1.09861	1.09861	0	0	0	6.34964	6.32128	6.33657	4.5326	5.03788	4.92622	0	0	0	6.17379	6.06412	6.12155	7.07762	7.04104	7.11848	6.22569	6.23076	6.19295	0	0	0	1.09861	0	0
130970_bclustnum_94_kamer_1_number_1	ATCTGACCTTGTGTAGGAGGTTAACAAGTGTGTTTATGTCATGATAGCACTTCGAATTAAACATTGCATCCAAATTTGATAATAAAGGTTGTTAAAATGTTATTCATATGGATATGATAG	6.76872	6.76227	6.72175	0	0	0	0	0	0	0	0	0	0	0	0	0	0	0	0	0	0	0	0	0	0	0	0	0	0	0
1309_bclustnum_6885_kamer_1_number_1	AGAAATGACAAATGGCAGTGTCATTCCGCGAGGTGGAGAGGCAATGGAAGCTTCCAAAATCTTCTCCTGTGACACTTGCCTCACTGAATTCGAACAAGGATGAGTAAAGACCA	0	0	0	1.09861	0	0	7.20361	7.27082	7.16261	0	0	0	0	0	0	0	0	0	5.85559	5.71613	5.79771	0	0	0	0	0	0	0	0	0
130_bclustnum_144_kamer_1_number_1	CACAACCACATAGAATGGAGTTGCAAATATTCAGAGGGAGTCCACCCAACAAACAAAGATAACTATTTGAATTGTCATTACTTGCATATTTTATTGTTT	0	0	0	0	0	0	0	0	0	0	0	0	6.75887	6.75084	6.81941	0	0	0	0	0	0	0	0	0	0	0	0	0	0	0
130_bclustnum_7462_kamer_1_number_1	AGGAGCAAACCTCAGAGGGAGTCCACCCAATGAACAAACAAAGATAAGTATTTTAATTATCATTTCTTACATATTTGTTTGTT	0	0	0	0	0	0	0	0	0	0	0	0	7.29097	7.29641	7.30971	0	0	0	0	0	0	0	0	0	0	0	0	0	0	0
13101_bclustnum_1343_kamer_1_number_1	ATTATTCTTCCATGATTATTATTCCATTAGCATCATTGAATAATCATACATTGAAAATATCAGCCATAGGTACGAGAAGTAAATCAATGCAATCACACCATGAACAAGAGTTTTCCTAG	0	0	0	0	1.09861	0	0	0	0	0	0	0	0	0	0	0	0	0	0	0	0	0	0	0	0	0	0	6.77216	6.66466	6.69782
13108_bclustnum_1158_kamer_1_number_1	TTTTGATAATTATTTGTTTACAATCTAAACATGGCATGTTGGAGCTTTGTATTTTTCCTTTCTAGCAGCCTAGATGAGGCAAATGATGCAATCAAAGAACTCCTAGAAAAGAATGGTTCTCTGCAAGAAGAAGTTAGAAAA	6.7269	6.71269	6.7285	0	0	0	1.60944	1.60944	0	0	0	0	0	0	0	0	0	0	1.42139	1.09861	0	0	0	0	0	0	0	0	0	0
131093_bclustnum_29_kamer_1_number_1	AAGTCATACTATCACTTATCGACATGGGCCAAATACCATGGGACAAATTAATATTGAAAGAGAGTCACTTTTACATCAGGGACGA	0	0	0	0	0	0	4.29046	4.23411	4.36945	5.59916	6.14204	6.67456	0	2.19722	1.09861	0	0	0	2.19722	1.79176	2.56495	0	0	0	0	0	0	0	0	0
13116_bclustnum_305_kamer_1_number_1	TCCATGGAATGGGACCCAAGGTTCTGAGCCATTCGGCACCCAACACAATGTCACAACCTCCCATGTCAATAGCA	0	0	0	0	0	0	0	0	0	0	0	0	0	0	0	7.02376	6.80762	6.84725	0	0	0	6.70983	6.76306	6.57388	0	0	0	0	0	0
131195_bclustnum_5_kamer_1_number_1	AGTGCCCACCCCGTCCATAGCACGGTTGAAAGGTCACCGAAGGTCTAGGGGCGTGACAGGTTTCCTCGCCCCGCCGTGACGACAGTCGCCCAACTGTGCGAAATGTAAGGTTTC	0	0	0	0	0	0	0	0	0	5.7944	7.49327	7.54918	0	0	0	0	0	0	0	0	0	0	0	0	0	0	0	0	0	0
13121_bclustnum_2379_kamer_1_number_1	AGGGGTCGCACCTTCCCCTTTACATACAGAGCATATAAGTACGTAGATACCTTGAACAAAAAAAACTTTGCAGCTACAAGCGTTATAGGCTTTTCGCAGGAAAAAGTAAGAAAAAGCTAAACATGCGATTGTCTAGT	0	0	0	0	0	0	3.93964	3.44681	3.50856	0	0	0	1.56398	1.60944	0	0	0	0	6.58571	6.50728	6.63944	0	0	0	0	0	0	0	0	0
13124_bclustnum_39_kamer_1_number_1	GTGGAAATCTAGATGTAGCCACACTTCCTTCTTTATAGAATTGAGTATGAAATAAATCTGTTAACTAATGAACCCAAACCTATGACAGAATTAGCAAG	0	0	0	0	0	0	0	0	0	6.70401	7.20299	7.21385	0	0	0	0	0	0	0	0	0	0	0	0	0	0	0	0	0	0
131268_bclustnum_17_kamer_1_number_1	TTTTAAACATAGCAAGTCACTCTTGAACATGGCACTCTGTCACACTCACGTCTGGGTTGGGAAATACATTTTCATTTTACATTTGTCTTACAGTTAGTCAAACCTCATTTTTTAA	0	0	0	0	1.09861	0	6.40286	6.30445	6.55536	3.77963	2.77259	3.21888	0	0	0	1.60944	1.09861	0	3.41623	3.80261	3.93964	1.09861	1.60944	1.60944	0	0	0	1.60944	1.09861	0
13127_bclustnum_111_kamer_1_number_1	ACCTTTTTCTTTTTCATATATCCTTCGATATTGAGGGTTTGAGGAGTGTTAATTCCAACCAATGCATTACACGATATCATGGGAGTCATATCTTCACTTGAGT	0	0	0	2.14007	2.0149	2.52573	5.07864	5.35081	5.26039	4.38895	4.49113	4.27512	3.19185	3.16407	3.34404	6.63358	6.36061	6.56216	4.94561	5.28545	5.09511	6.84204	6.87997	6.88408	0	0	0	2.76562	1.94591	2.03688
131289_bclustnum_29_kamer_1_number_1	TTTTAAAGTATTTCAAATTGTTTTTAAACCATTTTAAATTATTCTGAACTGTTTATAGGGCGTAATATCTTTTTATAGAGCATAGCAAGGGGTTCTTAGGCATAGTGAGGTTTTACCATGCATTCATTGATCGATCCCATCCAGTTCAGTTAGTTCCATAGC	0	0	0	1.09861	0	1.09861	6.72323	6.93828	6.71417	0	0	0	0	0	0	1.60944	1.46634	1.09861	0	0	1.09861	1.09861	1.60944	1.94591	0	0	0	0	0	0
131317_bclustnum_76_kamer_1_number_1	ATTTGTCTTTTTATTTTTTGTTTACGTCCCTAAGGGTTAGGTATTCAAGGGTTTTCCCTATGCTATAAATCTCTAATATACGTGTCAGGTCCAACAGTAGTACTCCGCC	0	0	1.09861	0	0	0	0	0	0	0	0	0	0	0	0	6.25229	5.59694	5.61386	0	0	0	6.52649	6.56273	6.55336	0	0	0	0	0	0
131380_bclustnum_37_kamer_1_number_1	TAAATGTAAAAGAGATAGGTCTCTTCACTTTAGAGCTCCTCCTTGGGTCACGTAGTTGGCCCCCCCTTGACCATGGGTATTCCCGCCTCAGCATGAGTTGACTCTCTGGTTTCTTTCATTGGTTTTTGGC	0	0	0	0	0	0	0	0	0	5.62916	6.73736	6.52062	0	0	0	0	0	0	0	0	0	0	0	0	0	0	0	1.09861	0	0
13139_bclustnum_1477_kamer_1_number_1	GAAGCCTCTTCCCTCAAAGCCATCCTTGACACTTTTGCAGAAGCTTCAGGTACCTCTATCAATGCTACGAAGTCCCAGATCTTTTTCTTCAATACTGCGCCTTACATTCAAGCTCGAATCGCTCGATCAGACGGA	0	0	0	0	0	0	5.75732	6.5582	5.73738	2.55305	2.99573	2.75154	0	0	0	0	0	0	5.87633	5.89597	5.82937	1.09861	0	0	0	0	0	1.09861	0	1.94591
131413_bclustnum_66_kamer_1_number_1	TGTTAACCATGATTGGTTAGGGACTGGATATTGGTCCGAGGTGTCATGCAGAGATAGAATACATCACACAAGTAATAAACACTTTCCTATGCAGAGAAGAACCTCAGACGAACAAGTACAAGCCCC	0	0	0	0	0	0	0	0	0	0	0	0	0	0	0	0	0	0	0	0	0	0	0	0	0	0	0	6.86154	6.83554	6.86206
13145_bclustnum_2183_kamer_1_number_1	GGAATTTTAAGGGAGGTTGCAGGAATGGTCGTTCTTGTTTTATTTCCGTCCTTTTGCATCGAGGGTGCCGCAGGCGATCAAACGATCGAGG	0	0	0	0	0	0	0	0	0	6.63171	6.79259	6.79185	0	0	0	0	0	0	0	0	0	0	0	0	0	0	0	0	0	0
131521_bclustnum_66_kamer_1_number_1	ACTAACCATAAGAACCACGTATTTCCTTCATGCAATTGCATGTGCCACATCCGTAGCTCGATCTGAAGTGCTGAGGACTTCAGATCGGAAGAGCGTCGTGTAGGGAAAGAGAG	0	0	0	0	1.09861	0	6.34338	6.29764	6.36032	4.45962	5.0635	5.0635	0	0	0	0	0	0	7.61713	7.74679	7.78709	0	0	0	0	0	0	1.54045	1.54045	2.48491
131522_bclustnum_8_kamer_1_number_1	AGAAGAGAGGAAAGGCCTCAAAAGAAAAGATCTAAAGTAGAGGAAGAAGATGCAGAAGA	0	0	0	0	0	0	0	0	0	0	0	0	6.66738	6.67792	6.62936	0	0	0	0	1.09861	0	0	0	0	0	0	0	0	0	0
131614_bclustnum_135_kamer_1_number_1	AAACATCACGGGACAAACTATTAACTCAACAAAGGTCCATGATCATAACAAGGAGAGATCAACACATCGCAAGGTGGATACATCATCTTTGCCAATACAACAATCATTAAAAGAAGCCGAGGCAAA	0	0	1.09861	0	0	0	0	0	0	0	0	0	0	0	0	0	0	0	0	0	0	0	0	0	7.3739	7.40812	7.43318	0	0	0
131621_bclustnum_202_kamer_1_number_1	CTATTTTACCCGAAACACCTGCTTGAAGATCAGTGTTGATGCTTGAGACCAGTTATAGGACTTGTAACATCCCCAACCTTAGACTTCTGGGCTATGCCACCGAAAA	0	0	0	0	0	0	0	0	0	0	0	0	0	0	0	1.09861	0	0	0	0	0	0	1.09861	1.60944	0	0	0	6.632	6.53452	6.63463
13168_bclustnum_263_kamer_1_number_1	TATTAATCCGGTATGTTTTCCTATATCAAGTCAAAATCCTACCTTGTGTTAGGATATCTTATATAAGTATACTTGGCATGATTGATTATGATTAT	0	0	0	0	0	0	0	0	0	0	0	0	6.76324	6.84292	6.70781	0	0	0	0	0	0	0	0	0	0	0	0	0	0	0
131766_bclustnum_36_kamer_1_number_1	AGAAGCATCTTCATTAGATTGAGCTGAAAAAATAGGAATCTTTCCCATTTTCAAAAGTAACCACCGTGAACTACCAACCCACAATTACAATCAACAAGACTTATGTGCACAAATATTGGAA	0	0	0	7.03775	7.02489	7.04395	0	0	0	0	0	0	0	0	0	0	0	0	0	0	0	0	0	0	0	0	0	0	0	0
13179_bclustnum_326_kamer_1_number_1	GGAGAGCTAGTTAGTGTGCCGTTGTATCCAATTTTGCCATTTTCGAGCTTTCCAGGAACGAAACGGACCGTTTCTAGGGCAT	0	0	0	0	0	0	3.59731	3.6064	3.7612	1.09861	1.94591	1.09861	0	0	0	0	0	1.60944	6.63966	5.65249	5.44817	0	0	0	0	0	0	0	0	0
1317_bclustnum_1078_kamer_1_number_1	TATTTTTATTCCCTTTTTAATATTTTTGGGAATTCTGGACCGTTTTTGAGGAAAATA	0	0	0	0	0	0	0	0	0	0	0	0	6.76734	6.67077	6.7678	0	0	0	0	0	0	0	0	0	0	0	0	0	0	0
13180_bclustnum_940_kamer_1_number_1	TATTTCTTGTATGTTTATAAATCCTTTAACAAGGTAGACCTAATAGTCTTACGTAAATCTCTTTACCGGGTGCATATTTTTTTAAGAAAAGTAAAAATATACCTAGTTTTGCTAAAGAAAGTACT	6.58858	6.54535	6.61271	0	0	0	0	0	0	0	0	0	0	0	0	0	0	0	0	1.09861	1.09861	0	0	0	0	0	0	0	0	0
13183_bclustnum_28_kamer_1_number_1	TCCTCTTCATCATTTTCATCTCCCCCTTCCTCATCAACATCTCCATCATCATCTGTTTACATCGAACTGAGCTGGGGATATTCGAAACTGCG	0	0	0	0	0	0	0	0	0	0	0	0	6.69001	6.68085	6.73776	0	0	0	0	0	0	0	0	0	0	0	0	0	0	0
131849_bclustnum_25_kamer_1_number_1	ATTCAGTGTGAAGAGACTTAGAAGGAAAAAGAGCAGTTGACAATCAGTTAATCAGAATGAAGAAAAGGAGAACATCAGATATCAGATCACAGAGGATCAAATCAGAGCG	6.6495	6.68411	6.70539	0	0	0	0	0	0	0	0	0	1.09861	0	0	0	0	0	0	0	0	0	0	0	0	0	0	0	0	0
131904_bclustnum_303_kamer_1_number_1	CAGCTATTCTTTAATGCTTGTTGACAATTTTAGTAGACTATGAAGGCACCGATATAAAGTCTACCTGTCGTTTTTGTGGAAAGAAGGGACATACATCTAATGTCTGTAGAAGTAGAAATGCACATCAGCATGATAAGCCTAAAATTGCA	6.79615	6.70964	6.83948	0	0	0	0	0	0	0	0	0	1.09861	0	1.09861	0	0	0	0	0	0	0	0	0	0	0	0	0	0	0
131984_bclustnum_42_kamer_1_number_1	GCATCCAGAACCATGTGCGAAAATCATTCACAAAACCATAGGTAGGTCCAACTTTTTTTTCTGCCTGGGGCCGCCC	0	0	0	0	0	0	6.61016	6.66721	6.62194	3.52046	3.39451	3.421	0	0	0	0	0	0	6.93362	7.07446	6.96016	0	0	0	0	0	0	0	0	0
132005_bclustnum_23_kamer_1_number_1	GGAAGGAAAGGAAGTCGAATCACGGGGTATCATAGGGAAGCCGGGAAGGATAATAAGCTCTAATGTCATGACAAAGCTTCTGAATCAAGAATCCAAGTGGATGGGGAGGATGTGACAGCCAGCAAAACATGACCATTGCGAGAACTTCCTCTTCCTTCGAACATTTTT	1.09861	0	0	0	0	0	1.94591	1.46634	1.7492	6.93374	6.89489	6.89377	0	0	0	0	1.09861	0	2.65676	1.09861	1.60944	0	0	0	0	0	0	2.85647	2.68102	2.82006
132145_bclustnum_28_kamer_4_number_2	TAATGTACAAACTATGTTATATTAGTTCTTTGAAATCCAATCTGAATAAGATAGTTATGCAATCTTTCATACCATGCAGATCG	6.72833	6.63889	6.69642	0	0	0	0	0	0	0	0	0	0	0	0	0	0	0	0	0	0	0	0	0	0	0	0	0	0	0
132170_bclustnum_119_kamer_1_number_1	CTAACACAATTCGAATTGAAACAGCTTTTCACTGGTGAAAAAATCTCATGAAAGTCAA	0	0	0	2.15948	2.12026	1.89712	5.52279	5.41165	5.64427	5.6204	5.35973	5.49853	3.91867	3.77659	3.51651	5.82206	5.61434	5.55425	6.94666	6.99851	7.0992	5.9428	6.08298	5.98561	0	0	0	2.45674	2.19722	1.60944
13217_bclustnum_52_kamer_20_number_2	ATATTTTGTCATTATTTTTGCCACTTCATTCTCCTGTGGAGTTCAGAAGTGTGCTCTTCCG	8.00936	8.07184	8.01467	5.73979	6.22719	6.09282	4.55388	4.59512	4.34381	0	4.17439	4.23411	0	0	0	0	0	0	1.60944	0	0	0	0	0	4.84419	6.04263	4.74493	4.61512	4.77912	4.77912
132180_bclustnum_22_kamer_1_number_1	GCCTTTCCTTTATACTTTTCTCGTTGGGAAATCAACGACCATGATCTAATCTTGAATAAATGGCTAAGATTAAAAGAAAGCTTGATCCGTGTGACTAAGACAATTCATCACATGTTTAATTAACTTT	0	0	0	0	0	0	2.80336	1.94591	2.74544	6.33417	6.65308	6.68253	1.09861	0	1.09861	0	0	0	3.26358	2.52	2.59856	0	0	1.38629	0	0	0	0	0	0
132219_bclustnum_83_kamer_1_number_1	CAGAGATGTGTTCAGTATGGGGTTAGCACAGGAAGCTATAAGGATAGACTGTGACAGCCAAAGTGCAATGTGTGGATTCCTTGGACATATGGGG	0	0	0	1.97716	2.85647	2.80336	7.43964	7.4558	7.32449	4.19182	4.39797	4.34381	1.09861	1.60944	1.09861	1.09861	0	0	8.22703	8.18475	8.17345	1.09861	0	0	0	0	0	0	0	0
13228_bclustnum_74_kamer_1_number_1	AAAGCGCACGGTGCACGATTGTAGTATAACGCATCAGGAGCCTATTGACAAAAAACATAGTTTGAGATCGGAAGAG	0	0	0	0	0	0	0	0	0	6.51708	0	1.60944	0	0	0	0	0	0	0	0	0	0	0	0	0	0	0	0	0	0
132291_bclustnum_22_kamer_1_number_1	TATTATAGCTGACTTTGTCTGCTTTAGCACGCCGGTTGTTTAGTCGGTCTGCAGCACTACTTAGTGCACGAGTGTCTCCGGTCGGAGATCTCACCCTTAGCCTCGGGGGGCT	0	0	0	0	0	0	2.99016	3.25381	2.5819	6.4813	7.14326	7.09619	0	0	0	0	0	0	3.70267	3.88728	3.74557	0	0	0	0	0	0	0	0	0
13232_bclustnum_1184_kamer_1_number_1	TGATCCCTACTACCATGATAACAATATTTCCTTCTAACTTTGGAAAACCTGTGATAAAATCCATTTAGACCACTTCACAATGCTGGCTTAGTATGGCTAGCAACTGAAGGATGCCCAATGTATTTATTGTCTCTCACTTATTTTTTTGGCATACCACAAAAATTTTCACATATTCTTTATGACCTTCCAAAAA	0	0	0	1.09861	0	0	6.85311	6.67291	6.82365	6.68486	6.74824	6.6925	3.24519	3.31216	3.34404	1.34993	1.50408	2.19722	5.76449	5.90318	5.92086	2.09323	1.5724	1.99243	0	0	0	4.92322	4.53021	4.81939
132393_bclustnum_38_kamer_1_number_1	GGGTGCTTCCCAATAATGCAACCGGTGCATACTCCCTTCGAGGACGGAGTGTGGAAGCCCATCTACCATGGATTTATTTGATAGCAGCAAATACTTATAATT	0	0	0	0	0	0	0	0	0	0	0	0	6.69233	6.55735	6.58175	0	0	0	0	0	0	0	0	0	0	0	0	0	0	0
132428_bclustnum_495_kamer_1_number_1	GGGTGGGGGTGAAAACCCCAAATTTTGAGCGCCACATGGAAACACCAAAATTTGGGCACCGGTGCGCCGCATGTGTCGGGTGGAAACCCCTAATTTTGGGCGCCGTTTGGAAAC	0	0	0	0	0	0	4.49475	4.62586	4.49678	0	0	0	0	0	0	0	0	0	6.70006	6.34292	6.56539	1.09861	0	0	0	0	0	0	0	0
132482_bclustnum_266_kamer_1_number_1	CATGACTCCAAATTTTTGATGTATGGTATACTTAAGTGACCCCACCAACTGTCGATAGACAGTGGCATCCACTACCTCCAGATCGGAAGAGCGTCGTGTAGGGAAAGAGTGTAGTCTCGG	0	1.09861	1.09861	0	0	0	3.56483	3.23024	3.69718	6.57609	7.57712	7.43981	0	0	0	0	0	0	4.87265	4.61182	4.91265	0	0	1.09861	0	1.09861	1.09861	0	0	1.09861
1324_bclustnum_2712_kamer_1_number_1	GTTTCCTGCTAAAATTAAATTTTTATCATTAAAAGTAACTACACAACCCTCATCACTGAGTTTTCCTACTGAAATTAA	6.96724	6.93718	6.73519	1.09861	0	1.09861	1.09861	0	0	0	0	0	0	0	0	0	0	0	0	0	0	0	0	0	0	0	0	0	0	0
132528_bclustnum_77_kamer_1_number_1	TTCCTACACGGTGCACATGTTTTTGAAACGCATGCGCAAACTATAGAAAGTCGCTATGACATAGAATGTGCATACTTTGATGATTCCATTTACGAAATAAA	0	0	0	0	0	0	0	0	0	0	0	0	7.44911	7.49016	7.4059	0	0	0	0	0	0	0	1.09861	0	0	0	0	1.09861	0	2.10413
132558_bclustnum_11_kamer_1_number_1	ATTATTTAGAATTAGAATGTTTTGATAATATTGAGAATATACTATGAATT	0	0	0	0	0	0	0	0	0	0	0	0	7.18735	7.19609	7.12882	0	0	0	0	0	0	0	0	0	0	0	0	0	0	0
132570_bclustnum_122_kamer_1_number_1	GAGCATCATATAAATCAGAAGCCCTCATCTCGGCCACTAGCGACTACTTAGATCGGAAGAGCGTCGTGTAGGGAAAGAGTGTAGATCTCGG	0	0	0	0	0	0	1.60944	1.09861	1.60944	6.00004	6.67834	6.63568	0	0	0	0	1.09861	1.50408	0	1.09861	0	1.82455	1.335	0	0	0	0	0	0	0
132585_bclustnum_22_kamer_1_number_1	GAGAAGATGTATTTGTTTAACATCTAAATAAAGCTGAATATGTATGTTGATTTGAGTTACGATAATAATAAGAATGTTTGTGTTTTGAAAAAGGATAAAGAGGAATTGATTA	0	0	0	6.81114	6.83195	6.79194	0	0	0	0	0	0	0	0	0	0	0	0	0	0	0	0	0	0	0	0	0	0	1.09861	0
132586_bclustnum_261_kamer_1_number_1	CAACTTGTCCTTCGTATAGATGGGTGAAATGTCCACCGAAAATTGGGATTGTGGAATACGTCATGGCCTATTGAAGTGAT	0	0	0	0	0	0	0	0	0	0	1.09861	0	0	0	0	6.35338	6.20571	6.26449	0	0	0	6.8644	6.84329	6.78784	0	0	0	0	0	0
132654_bclustnum_52_kamer_1_number_1	ATGCCTTCATGCCTCTTACAACTTTGTCCCCCTTCACACGGGAATAAAGTTGTCTCACACATGTGTGAGAAGCCATGCTTCTCACA	6.57228	6.64509	6.72293	0	0	0	0	0	0	0	0	0	0	0	0	0	0	0	0	0	0	0	0	0	0	0	0	0	0	0
13265_bclustnum_3598_kamer_1_number_1	GAGGTAATACTTTTGCATGGCACACATTAAACGAGTAATTTCTCTCTTCCAATATTTAATATCTTCCTTATG	2.60796	1.98591	2.34455	0	0	0	0	0	0	0	0	1.09861	0	0	0	1.76766	1.42139	2.09714	0	0	0	2.2882	2.16496	2.13163	0	0	0	6.61912	6.51344	6.52146
132727_bclustnum_329_kamer_41_number_7	GATACATACTGTGTTAATGTGTGAATGCTCTTAATGTTTTATGTTATTAT	0	0	0	0	0	1.52606	7.98201	7.95486	7.96423	0	0	0	0	0	0	0	0	0	8.86398	8.76546	8.80553	0	0	0	0	1.09861	0	0	0	0
132782_bclustnum_86_kamer_1_number_1	AATCCAACGAGGATCTTCCTCATCCAAATGCCTCGATGCAGCCAAGCTTGCTGCCATGTACTCGGCCTTTGCTGAA	0	0	0	0	0	0	1.89712	1.09861	1.09861	5.7847	6.76075	6.72675	0	0	0	0	0	1.09861	1.76766	0	1.71765	0	0	0	0	0	0	0	0	0
13279_bclustnum_644_kamer_1_number_1	ATGCTTAAAATGATGGATGGAGAAATTTTTAGATAGGTTAGATTTCCTTTCTAGCTAGCAAGTGTGTTTCTCCCATGCTTCATCTGTGTGATCCAAATAAGCCTAAGATCCTCAAAACTTATGGG	0	0	0	2.83321	1.8068	2.60796	6.71226	6.6855	6.65544	0	0	0	1.09861	0	0	0	0	0	0	1.09861	2.07944	0	0	0	0	0	0	0	0	0
13280_bclustnum_107_kamer_1_number_1	CAGGCCCAATATGTGCCCCAGGGTCAACCCCAGTATTCTTGTAATTCTGACAATAACTCTAGAGGACGTTCCATCCATAGATCTTTGATTTATTGTCATTGAC	0	0	0	0	0	0	1.09861	0	1.60944	0	0	0	0	1.09861	0	0	0	0	8.6315	8.41538	8.44204	0	0	0	0	0	0	0	0	0
132825_bclustnum_272_kamer_1_number_1	ATGTAAATTATGGCGACAAGGAAGCTTACCACTCACTTCTATAATGATGGCAGTATTGCTACTCCCCAGTGGCATCCATTGTGTTCTCCCCTAGGAGGTTGCTTGGATG	0	0	0	0	0	0	2.07944	2.73003	2.15948	7.14362	7.78471	7.89395	0	0	0	0	0	1.84583	2.66259	2.24071	1.38629	1.09861	1.09861	0	0	0	0	0	0	0
132843_bclustnum_26_kamer_7_number_2	TGTTGATTCTCTTTGAGGACAAGATCACCAACCTTAAAGGTACGCTCATGAAGTCGCTTATCATAAGCACGCTTGATGAGTTTTTGATAGATTTGAAGGTGATCAAGAATGTAAA	0	0	0	6.68473	6.70296	6.7072	0	0	0	0	0	0	0	0	0	0	0	0	0	0	0	0	0	0	0	0	0	0	0	0
13284_bclustnum_4331_kamer_1_number_1	AGCCTCATAAACCCTACAAAGTGTGTCTTTGGATGTTCTAAAGGCGTCTTGTTAGGGCATGTTGTATCCAGAGATGGTATTGGAACTGATCCTGATAAAGTTTCAAAAATCAAAGATTTACCATTTCCTATGAATAGAAGTAAGTTGAGATCATTTTTAGGCCATGTG	0	0	0	6.66902	6.77608	6.72982	0	0	0	0	0	0	0	0	0	0	0	0	0	0	0	0	0	0	0	0	0	0	0	0
132862_bclustnum_355_kamer_1_number_1	GTATTTTTAAGAATACATCAAATGGGTAACAAATTAACACTTGAGAAACAGGTCCAAGTACAAGGGGTTAAATCTTACATGTAGGGTCCTACACGATTCACACCAAATAAGCCGCCAGAGAATGCTAGTTGCCCTCTTGACGAAGGTGAAGAAATGCGTAGGGT	0	0	0	0	0	0	0	0	0	0	0	0	0	0	0	7.20266	7.36382	7.20095	0	0	0	7.00657	6.96966	6.95314	0	0	0	0	1.09861	0
1328_bclustnum_462_kamer_1_number_1	AGCCTAGCCCATCCAAGCCTATCCTAGCCTACTCTCCCTAGACAGTCTAC	0	0	0	0	0	0	0	0	0	0	0	0	0	0	0	6.67985	6.70221	6.74547	0	0	0	4.89335	5.03044	4.83469	0	0	0	0	0	0
132965_bclustnum_19_kamer_1_number_1	AATGTGTCAAAAACAATTTCATCCCCTTAGTTATACCAGAAAATTACATTTGGAAACCACGTAAGCAAAAGAGGAGTCGACATTATAATCTTCCGGGGACATGTTCTTTCAATAATTAACATCACATGGAAATAAGTAAATCTATTAAGGCAAGTAGTAGATATAC	0	0	0	0	0	0	0	0	0	0	0	0	0	0	0	0	0	0	0	0	0	0	0	0	6.58156	6.51412	6.4889	0	0	0
13297_bclustnum_918_kamer_1_number_1	GGTAGCGTGAAGACACACGAGGACCTGGAGCAGTGTTGATGCTTGGATACCAGATGGCAGTGT	0	0	0	0	0	0	0	0	0	0	0	0	0	0	0	0	0	0	0	0	0	0	0	0	0	0	0	7.20638	7.2118	7.19269
132981_bclustnum_229_kamer_16_number_3	TTTCCTTGGACTGCTCAAGCTGCTCTCTTCAAACTGTACAAATTCCCATATGTGCTCCAATTCCTCTCGCAACAAGAGGATGGAGT	0	0	0	0	1.09861	1.83258	5.65774	5.62852	5.67761	5.76676	6.59646	6.59064	5.00897	5.0073	4.85593	5.05943	4.97328	5.02223	6.28693	6.10368	6.08051	5.23378	5.3483	5.26139	0	0	0	4.46303	4.22318	4.48582
132993_bclustnum_34_kamer_1_number_1	CACCACTTTTCCTTTGTGACCTCCAACTTCACATCCGGAACCATCATATCAGAGATTGTGTTCAGCGGAGAATCATGTGTTTCATGATAGGTCCAAAAAACT	0	0	1.09861	0	0	0	5.42621	5.74833	5.49541	6.40109	7.18831	7.07097	0	0	0	0	1.09861	0	6.81924	6.85506	6.68711	0	0	0	0	0	0	1.60944	1.25276	1.52606
13304_bclustnum_1187_kamer_1_number_1	GATTTTAAAATGGGGGGTGCTAAGCGATTATTCTTGTCGAAGGCATGCGAAATGATAAAAAGTTGTTATGACATAGGATGTGCATACTTTGTTGATTTCATTTATGAAATCATGTAAACCTTCTAAA	0	0	0	0	0	0	0	0	0	0	0	0	6.64379	6.65844	6.5662	0	0	0	0	0	0	0	0	0	0	0	0	0	0	0
133061_bclustnum_573_kamer_1_number_1	TCGCTTAGAGGGAGCTAAAATTTCAGGAGGAGAAAGCCATGAAGAGTTCGCTT	1.09861	0	0	0	0	0	6.54736	6.66772	6.59058	7.10349	8.21419	8.15588	0	0	0	0	0	0	7.81383	7.53145	7.58365	0	0	0	0	0	0	1.09861	1.09861	2.19722
13314_bclustnum_3252_kamer_1_number_1	ATGATGAAGATGGTGATGATGATATTAGATGCAGTGATCATAATCATCCCGGGGAGAATTTTTTTATCAAATGCCACACAATCAAGTTGT	1.09861	0	2.19722	0	0	0	1.09861	0	0	0	1.09861	0	6.58678	6.54103	6.68808	0	0	0	0	0	0	0	0	1.09861	0	0	0	1.60944	1.60944	1.94591
13318_bclustnum_836_kamer_1_number_1	TAGTTGATATTTTTCCTCGCACATACCGCGAAACACTTTCATTCATTCTTGGCCAGTAACAAAATCTTTGCAAATTTGCCACTGTCTTGCCAACACCAAAATGACCAGCAATAAGCGAAGAATGTGCTTCTCTTATGATGTTGATT	0	0	0	1.50408	1.09861	0	2.61496	2.53898	2.63254	2.42037	2.76001	2.35665	0	0	1.09861	6.62038	6.62284	6.59104	2.68351	2.92512	2.94444	7.03126	7.06127	6.99626	0	0	0	2.12026	2.62467	2.95317
133210_bclustnum_166_kamer_1_number_1	GTAGCTAACTTCATAAGCATTACCACTGTCAAACTTCTTCAAGATTTTACAAGGTCCAAATTTCTTCATCTTCAGTTTACTGTATGTTCCAACTGGAGATCGGAAGAG	6.52386	6.51797	6.48647	0	0	0	0	0	0	0	0	0	0	0	0	0	0	0	0	0	0	0	0	1.09861	0	0	0	0	0	0
133222_bclustnum_4_kamer_1_number_1	AATGGTTTCTTTATCTTGTTCATCAATTGATTACTTCACTACATACCCTATAGCTTGGTGGAGTTCAAAAACTTTAACAGATTTTACGCAAGATCGCAAGAGAACAGCTACTTGCGACAAGAGAGCAGCTAC	0	1.09861	0	0	0	0	6.51669	6.49426	6.43455	0	0	0	0	0	0	0	0	1.09861	0	0	0	0	1.09861	1.09861	0	0	0	0	0	0
133291_bclustnum_39_kamer_1_number_1	GATTTGATCTTCAGTTTTAATGTGAACTCTCTTAAGAGCAAATAAATCTGCAACAGGATCAGTGAGTAGGGCTGAAATCGCCAGCATGCTGGATGAATTTAAAACTGACATCCTCGGGATGCTATATTCACAATTGGATCTGTTACAAGCTAAAAAAAATTAAAGGCTGAGAGGCACT	0	1.09861	0	0	0	0	6.75704	6.71296	6.70408	0	1.09861	1.09861	0	0	0	1.09861	0	0	5.92113	5.99215	5.92211	0	1.09861	1.09861	0	0	0	0	0	0
133303_bclustnum_13_kamer_1_number_1	GACACTTAAGTGTGATTACACAAGGGCATGATAGGTTGAAACCTGCTTTGGGGAGGACCCACTCGTGTAATTTTGTAATCTTTATTAATTCTCTAGCTTGAACACATAATTTCTTACCCTCA	0	0	0	0	0	0	0	0	0	0	0	0	0	0	0	0	0	0	0	0	0	0	0	0	6.6427	6.64401	6.63813	0	0	0
1333_bclustnum_628_kamer_1_number_1	ATAACGGATAAGGAAGAAGGAGGGAGAACGGCAAGGTTATACCTTCCCCTACTCCTCTACTA	0	0	0	1.5506	1.94591	1.38629	1.09861	0	0	0	0	1.09861	7.70165	7.72028	7.67703	3.07269	2.69463	2.8792	0	1.09861	0	2.83321	3.00568	3.34639	0	0	0	6.01567	5.9496	5.8966
1333_bclustnum_644_kamer_1_number_1	AGTTACCTCTTGTCTTTCTCTCCATTATCTTCACTTTTGTTTGCGAATCTG	0	0	0	0	0	0	0	0	0	5.75469	6.62936	6.55108	0	1.09861	1.09861	0	0	0	0	0	0	0	0	0	0	0	0	0	0	0
133401_bclustnum_93_kamer_1_number_1	ATACAGAATCAATACTATATACCCCTGCTCATCACATTTGATATATAGATTTGGATCACTCTTGCTCCTCATAAATCCCGGTTGAATAAAGAAAGAGTCTATCTTCTCATACCATGACCTAGGTGCCTGTTTTAGTCC	1.6864	1.94591	1.09861	0	0	1.09861	1.91365	2.56495	2.57884	1.60944	1.34993	1.64866	3.25513	3.24918	3.19395	6.51722	6.41585	6.46351	1.89712	1.88031	2.48491	6.40039	6.34199	6.49072	0	0	0	3.23111	3.32945	2.86
133439_bclustnum_80_kamer_1_number_1	GCTATACTCTTTGTTACACAGTAATTCGTCACCGTCCCTACCATTCCCCATCCCGCACAATGGAGGACCCATTTTGTGACCTGTGAACATTGTCATGCCTT	0	0	0	0	0	0	0	0	0	6.50578	7.24208	7.24122	0	0	0	0	0	0	0	0	1.38629	0	0	0	0	0	0	0	0	0
133452_bclustnum_110_kamer_1_number_1	AGCACAAATTTAACTAGATGATATATTGATCTTTAGTAAGACATTAGAGTAGAATTTGATTCATATTCGTAATGTGTTTGATAAGTTGAGGGAAGAAAAATTGCTAAT	6.51915	6.46116	6.37605	0	1.60944	0	0	0	0	0	0	0	0	0	0	0	0	0	0	0	0	0	0	0	0	0	0	0	0	0
133453_bclustnum_177_kamer_1_number_1	TGCTTGTTCCACTCTTGTGTCGCATATCATGACCTTCAGCCCCACTGTCCCCTATCCCTTCCGATATT	0	0	0	0	0	0	0	0	0	5.48361	6.7417	6.69827	0	0	0	0	0	0	0	0	0	0	0	0	0	0	0	0	0	0
1334_bclustnum_3527_kamer_1_number_1	TGATTTGAAAATTGTTACGACAAAATATAGAGATTGGTTTCCTGAGGAAT	0	0	0	0	0	0	6.13556	6.51397	6.85541	3.63759	3.29584	3.29584	1.09861	0	0	4.95442	5.03565	4.88432	6.56667	5.78306	6.13686	4.96004	4.80019	4.85774	0	0	1.09861	0	1.43508	1.60944
13350_bclustnum_1707_kamer_1_number_1	GAGCTCTCTTAGGACACCTGCGTTATATTTTAACAGATGTGCCGCCCCAGACAAACACCCCACCTGACAATGTCTTCCGCCCGGATAGACACGT	5.37064	5.27527	5.11666	5.9428	5.94513	6.02345	5.82797	5.72974	5.97268	6.52095	7.13648	7.05704	7.07656	7.02633	7.18933	6.14633	7.09645	7.00337	6.75835	6.81625	6.72263	7.0818	7.04103	7.00053	4.08504	3.92307	4.11451	6.50678	6.65944	6.608
13354_bclustnum_5567_kamer_1_number_1	TACGCACACTTTTTTCACCTCTTATCCCTTCAAAGCTAGTACAGTTGCCACCACATTCATGGAGACAGTTCAAAAGCTA	0	0	0	0	0	0	1.09861	0	0	0	0	0	0	0	0	6.91523	6.83518	6.9182	0	0	0	7.61616	7.62985	7.6324	0	0	0	3.66356	3.84481	3.92691
1335_bclustnum_294_kamer_1_number_1	TATGTGGATGCAATGCTCGTTGCAGGGTCTAACATGCAGGATATAAATGTACTCAAAAGAATTAGCTAATTCATTTGCGATGAGGATTTGGGTGCTG	0	0	0	0	0	0	3.49651	3.25381	4.15715	4.09988	5.30882	5.09375	6.44871	6.50012	6.47372	3.3825	2.75154	3.31216	3.77148	3.30403	4.06236	3.74031	3.54257	2.94444	0	0	0	5.66257	5.73693	5.72031
133605_bclustnum_16_kamer_1_number_1	CAGCAGGAGGAGCACTGGTGGACACTTCATCATCTTGCTCCTTAATCACGTCCTCATTCTGTCGGTTGAAAACTTGTAAAAACATTCAATGCAAATATATATCATCGCTGAGGTAGGCATTCTCTACTCA	0	0	0	1.46634	0	0	6.54514	6.57707	6.55698	5.93904	6.60568	6.67004	0	0	0	1.99655	1.81916	2.27727	7.51278	7.46123	7.57697	2.25606	2.36428	2.4463	0	0	0	0	0	0
133660_bclustnum_89_kamer_1_number_1	CAATTATATGCAACAACATCCAAATGTTTCTTTGTATTACAAGAGGCAGAATATCTAGGTCATATTTTATCTCACGAGGGTGTTAAGGTAGACCTTAACAAAATTAAAGCTATTAATTAATGGAAAGTCAATCGGAGAGCGTCGTGTAGGGAAAGA	0	0	1.09861	0	0	0	3.97343	4.11904	4.04597	6.87296	7.44122	7.4689	2.29345	1.8718	2.15948	1.91959	2.19722	2.4463	3.87812	3.87812	3.97343	2.8648	2.7554	1.52606	0	0	0	1.53393	1.60944	2.36428
133674_bclustnum_44_kamer_1_number_1	TAATGAAGAATAAAGCATCTTGTAACACATCACCTGCTACATTTGCTTCTTG	0	0	0	0	0	0	2.33537	2.77259	1.89712	2.80336	2.80336	1.94591	0	0	1.60944	2.70805	2.56495	2.85647	2.26868	1.7346	2.87168	3.40784	3.04452	2.56495	0	0	0	7.05841	7.1048	7.05324
133757_bclustnum_137_kamer_1_number_1	AAATATACCTTTATTTAATGTCATCTTTTATTGAATGAATGTGTTGACTGAATGA	0	0	1.09861	0	0	0	0	0	0	0	0	0	6.53698	6.5706	6.38722	0	0	0	0	0	0	0	0	0	0	0	0	0	0	0
1337_bclustnum_2201_kamer_1_number_1	AAGCAAGATTATTGCCCGGGGCTTCTCACAGATTGAGGGGATTGACTATGAGGAAACCTTTGCACCTGTCGCAAGGTATTATTCCATACGGAGCATCCTATCTCTCTCAGCGCAGATGGGTTGGCACATT	1.09861	0	0	0	0	0	5.63895	5.84258	5.86316	6.7944	7.18184	7.11828	1.34993	0	0	4.26033	4.09712	3.91867	6.18484	6.04263	6.11147	4.01938	3.66821	4.05468	0	1.60944	0	1.09861	1.09861	1.09861
133966_bclustnum_11_kamer_1_number_1	AGATCCCATTTTTACTGGAAATTTTTGGACGGAGTTATTTTCTTGTTTGGGTACTGAATTAGTCATAG	0	0	0	0	0	0	2.09714	3.03082	3.03082	7.59668	7.61502	7.59309	1.09861	1.09861	1.79176	1.09861	1.38629	1.34993	3.38681	2.98856	3.76782	1.5506	2.22848	1.42139	0	0	0	1.09861	1.09861	1.09861
[truncated: 8,098 more rows]
