# Supplementary figures and images for: Comparative Genomics Analysis of Repetitive Elements in Ten Gymnosperm Species: “Dark Repeatome” and Its Abundance in Conifer and Gnetum Species
Source: MDPI journal article supplement (doi:10.3390/life11111234), 2021-11-15

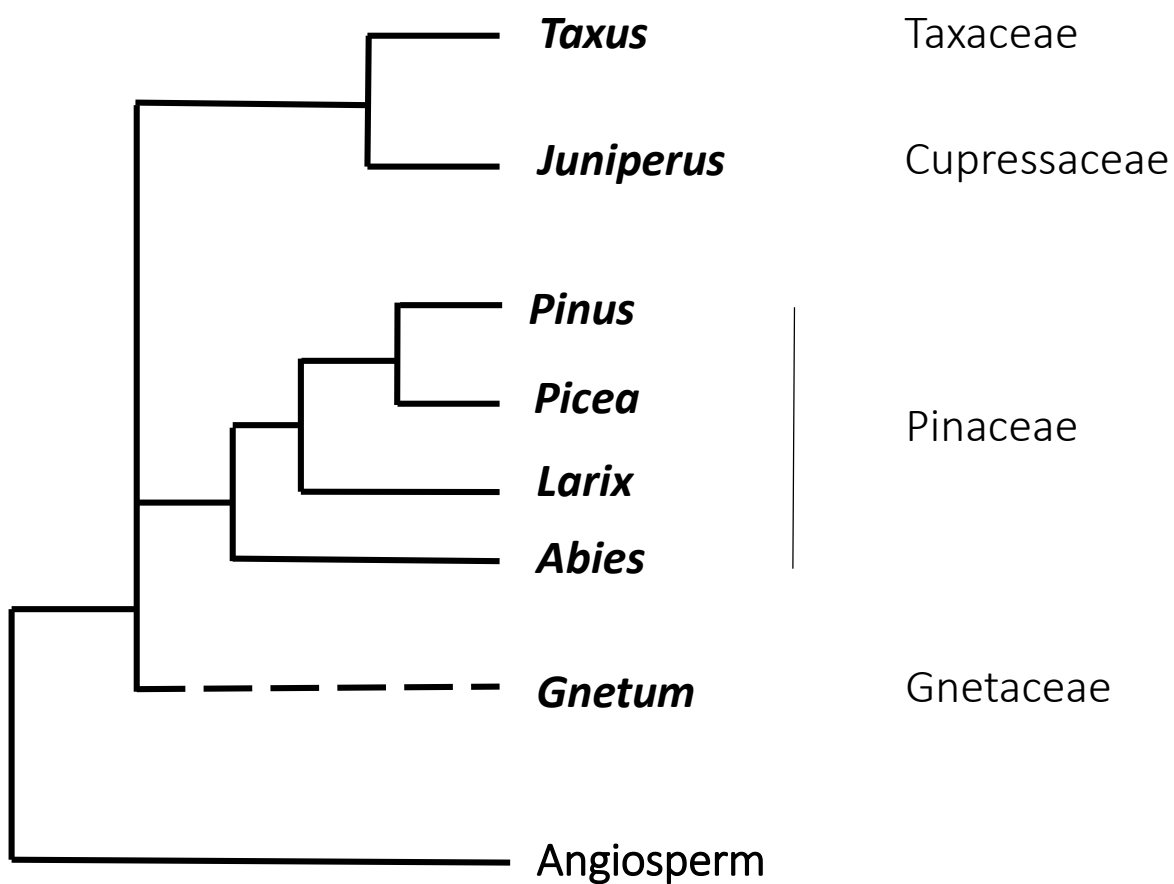

**FigureS2.** A simplified depiction of studied plant phylogeny adapted from Uddenberg et al, 2015 [39].

Supplement: s1 [file s1]
